# Supplementary material for: Data mining reveals tissue-specific expression and host lineage-associated forms of Apis mellifera filamentous virus
Source: PeerJ. 2023 Nov 14;11:e16455. doi: 10.7717/peerj.16455 (PMC10655722; doi:10.7717/peerj.16455)
Supplement: Supplemental Information 12 — Runs are discrete sequencing sets produced by a sequencing platform and are grouped with related runs under a BioProject. BioSamples are accessions linking metadata for a biological sample that was sequenced; only a subset of user-provided metadata are shown that are relevant to the analyses performed in this study. Run and sample metadata are as provided by the National Center for Biotechnology Information (NCBI), see www.ncbi.nih.nlm.gov for more information. Derived metadata are sample metadata reassigned to simplified categories for this study, and are therefore subject to error or alternative interpretation. Count data are raw counts of kmer abundances in a subsample of reads (see text for details). Note that the column headers are not the same for each page. [file peerj-11-16455-s012.xlsx]

## Sheet: Honey bee DNA
Supplemental File S1: Metadata and count data for scanned Sequence Read Archive (SRA) run accessions. Runs are discrete sequencing sets produced by a sequencing platform and are grouped with related runs under a BioProject. BioSamples are accessions linking metadata for a biological sample that was sequenced; only a subset of user-provided metadata are shown that are relevant to the analyses perf…
Run metadata												Sample metadata													Derived metadata							Count data
Run accession	Spots	Bases	Average read length	Library Name	Library Strategy	Library Selection	Library source	Library layout	Platform	Model	BioProject	BioSample	Sample name	Isolate	Isolation source	Collection date	Geographic location	Tissue	Development stage	Latitude and longitude	Sex	Age	Caste	Host tissue sampled	Inferred developmental stage	Inferred sex	Inferred tissue	Inferred queen status	Latitude	Longitude	Country	Detection status	Clade1 AmFV	Clade2 AmFV	Clade3 AmFV	Kmers shared among clades	A. mellifera CDS kmers	A. mellifera 18S kmer (E-form)	A. mellifera 18S kmer (A-form)
SRR11038104	27814938	8400111276	302	Sample 36	WGS	RANDOM PCR	GENOMIC	PAIRED	ILLUMINA	Illumina HiSeq 4000	PRJNA605407	SAMN14056754	Italian2_12	Honey Bee	Colony	2018-03	USA:Louisiana	Whole body	NA	NA	female	NA	NA	NA	NA	female	whole body		NA	NA	USA	Positive	19203	2806	1105	33695	9053	118	0
SRR11038106	25505237	7702581574	302	Sample 34	WGS	RANDOM PCR	GENOMIC	PAIRED	ILLUMINA	Illumina HiSeq 4000	PRJNA605407	SAMN14056752	Italian2_10	Honey Bee	Colony	2018-03	USA:Louisiana	Whole body	NA	NA	female	NA	NA	NA	NA	female	whole body		NA	NA	USA	Positive	61655	9065	4298	110772	7734	112	0
SRR11038109	23664112	7146561824	302	Sample 31	WGS	RANDOM PCR	GENOMIC	PAIRED	ILLUMINA	Illumina HiSeq 4000	PRJNA605407	SAMN14056749	Italian2_7	Honey Bee	Colony	2018-03	USA:Louisiana	Whole body	NA	NA	female	NA	NA	NA	NA	female	whole body		NA	NA	USA	Positive	190063	25443	12226	328039	7382	90	0
SRR11038113	30532681	9220869662	302	Sample 28	WGS	RANDOM PCR	GENOMIC	PAIRED	ILLUMINA	Illumina HiSeq 4000	PRJNA605407	SAMN14056746	Italian2_4	Honey Bee	Colony	2018-03	USA:Louisiana	Whole body	NA	NA	female	NA	NA	NA	NA	female	whole body		NA	NA	USA	Positive	98493	13554	6081	171282	8460	178	2
SRR11038117	27516262	8309911124	302	Sample 24	WGS	RANDOM PCR	GENOMIC	PAIRED	ILLUMINA	Illumina HiSeq 4000	PRJNA605407	SAMN14056742	Italian1_12	Honey Bee	Colony	2018-03	USA:Louisiana	Whole body	NA	NA	female	NA	NA	NA	NA	female	whole body		NA	NA	USA	Positive	31141	3402	1722	53215	10295	106	5
SRR12726878	96921907	24230476750	250	POOL_12_CTTGTA_L004_	WGS	RANDOM	GENOMIC	PAIRED	ILLUMINA	Illumina HiSeq 2500	PRJNA666033	SAMN16277084	POOL_12	NA	hive	2015	Cyprus	head	NA	NA	female	NA	NA	NA	NA	female	head		NA	NA	Cyprus	Positive	4766	579	197	8395	7968	85	2
SRR5580780	24410492	2441049200	100	ap45_rep1	WGS	RANDOM	GENOMIC	SINGLE	ILLUMINA	Illumina HiSeq 2000	PRJNA385500	SAMN06921451	ap45	worker bee	Placerita Canyon Natural Area	1999	USA:CA, LA Co. Placerita Cyn. Nat. Area, replicate 4	whole body	NA	NA	female	adult	NA	NA	adult	female	whole body		NA	NA	USA	Positive	496	70	25	814	518	7	0
SRR5580783	30277954	3027795400	100	ap48_rep1	WGS	RANDOM	GENOMIC	SINGLE	ILLUMINA	Illumina HiSeq 2000	PRJNA385500	SAMN06921452	ap48	worker bee	Placerita Canyon Natural Area	1999	USA:CA, LA Co. Placerita Cyn. Nat. Area, replicate 5	whole body	NA	NA	female	adult	NA	NA	adult	female	whole body		NA	NA	USA	Positive	23398	2816	916	35482	2297	20	8
SRR5580787	33647600	3364760000	100	ap41_rep1	WGS	RANDOM	GENOMIC	SINGLE	ILLUMINA	Illumina HiSeq 2000	PRJNA385500	SAMN06921448	ap41	worker bee	Placerita Canyon Natural Area	1999	USA:CA, LA Co. Placerita Cyn. Nat. Area, replicate 1	whole body	NA	NA	female	adult	NA	NA	adult	female	whole body		NA	NA	USA	Positive	717	78	45	1311	15	2	0
SRR5580801	27023326	2702332600	100	ap38_rep1	WGS	RANDOM	GENOMIC	SINGLE	ILLUMINA	Illumina HiSeq 2000	PRJNA385500	SAMN06921468	ap38	worker bee	San Jacinto Mountains	1983	USA:CA, Riverside Co. San Jacinto Mnt., replicate 1	whole body	NA	NA	female	adult	NA	NA	adult	female	whole body		NA	NA	USA	Positive	1487	213	65	2121	2063	54	0
SRR5580831	86165112	8616511200	100	SRCD11C	WGS	RANDOM	GENOMIC	SINGLE	ILLUMINA	Illumina HiSeq 2000	PRJNA385500	SAMN06921488	SRCD11C	worker bee	Stanislaus County	2014	USA:CA, Stanislaus County, replicate 2	whole body	NA	NA	female	adult	NA	NA	adult	female	whole body		NA	NA	USA	Positive	29951	3272	1686	55122	6654	10	0
SRR5580834	25006309	1900479484	76	ap11_rep1	WGS	RANDOM	GENOMIC	SINGLE	ILLUMINA	Illumina HiSeq 2000	PRJNA385500	SAMN06921493	ap11	worker bee	University Campus	2010	USA:CA, UC Berkeley Campus	whole body	NA	NA	female	adult	NA	NA	adult	female	whole body		NA	NA	USA	Positive	24698	3253	1189	43202	2877	27	0
SRR7442297	128838600	38582682986	299	riz-lr-tw	WGS	PCR	GENOMIC	PAIRED	ILLUMINA	HiSeq X Ten	PRJNA478213	SAMN09501441	CBS_Apismelliferacarnica_D945-R08	NA	NA	NA	NA	thorax	worker bee 1	NA	female	NA	NA	NA	adult	female	thorax		NA	NA	NA	Positive	6929	926	317	11498	8104	188	0
SRR7442303	127768176	38279303026	299	riz-hr-ly	WGS	PCR	GENOMIC	PAIRED	ILLUMINA	HiSeq X Ten	PRJNA478213	SAMN09501435	CBS_Apismelliferaligustica_D945-R02	NA	NA	NA	NA	thorax	worker bee 1	NA	female	NA	NA	NA	adult	female	thorax		NA	NA	NA	Positive	14037	1475	631	24594	8359	224	0
SRR15173571	35574877	10672463100	300	POR2_GTGAAA_merged	WGS	size fractionation	GENOMIC	PAIRED	ILLUMINA	Illumina HiSeq 2500	PRJNA311274	SAMN20257339	POR2	POR2	Hive	2014	France: Porquerolles	thorax	NA	NA	male	NA	NA	NA	NA	male	thorax		NA	NA	France	Positive	8578	860444	4074	946716	4256	0	0
ERR5665174	15966631	4312243653	270	unspecified	WGS	other	GENOMIC	PAIRED	ILLUMINA	Illumina HiSeq 3000	PRJEB34590	SAMEA7109110	SAMEA7109110	NA	NA	1947	Switzerland	NA	NA	NA	worker	NA	NA	NA	NA	female	NA		NA	NA	Switzerland	Positive	12934	157307	4324	151357	7241	0	0
ERR5665177	30675145	8851306864	288	unspecified	WGS	other	GENOMIC	PAIRED	ILLUMINA	Illumina HiSeq 3000	PRJEB34590	SAMEA7109117	SAMEA7109117	NA	NA	1941	Switzerland	NA	NA	NA	worker	NA	NA	NA	NA	female	NA		NA	NA	Switzerland	Positive	79063	1187669	38198	1178520	4794	0	0
SRR12726920	94586847	23646711750	250	POOL_0_GCCAAT_L004_	WGS	RANDOM	GENOMIC	PAIRED	ILLUMINA	Illumina HiSeq 2500	PRJNA666033	SAMN16277072	POOL_0	NA	hive	2015	Spain: Basque country	head	NA	NA	female	NA	NA	NA	NA	female	head		NA	NA	Spain	Positive	1107	14493	491	18314	7126	108	0
SRR15173450	13289895	3986968500	300	NCA37_GGCTAC_L002	WGS	size fractionation	GENOMIC	PAIRED	ILLUMINA	Illumina HiSeq 2500	PRJNA311274	SAMN20257448	NCA37	NCA37	Hive	2014	New Caledonia	thorax	NA	NA	male	NA	NA	NA	NA	male	thorax		NA	NA	New Caledonia	Positive	728	7163	352	9894	7804	239	0
SRR15173486	14593498	4378049400	300	YC7_GTTTCG_L002	WGS	size fractionation	GENOMIC	PAIRED	ILLUMINA	Illumina HiSeq 2500	PRJNA311274	SAMN20257415	YC7	YC7	Hive	2014	France	thorax	NA	NA	male	NA	NA	NA	NA	male	thorax		NA	NA	France	Positive	8036	46562	1252	109116	9329	253	0
SRR15173770	9362799	2808839700	300	ESP15_GGCTAC_L007	WGS	size fractionation	GENOMIC	PAIRED	ILLUMINA	Illumina HiSeq 2500	PRJNA311274	SAMN20257109	ESP15	ESP15	Hive	2014	Spain: Central Transect 1	thorax	NA	NA	male	NA	NA	NA	NA	male	thorax		NA	NA	Spain	Positive	620	5171	452	10174	5999	211	0
SRR15173784	15437862	4631358600	300	CIReine-M-Durapi-5_ATCCACTG-ACGCACCT-AH2TG7BBXY_L005	WGS	size fractionation	GENOMIC	PAIRED	ILLUMINA	Illumina HiSeq 2500	PRJNA311274	SAMN20257096	CIReine-M-Durapi-5	CIReine-M-Durapi-5	Hive	2014	France: Vaucluse	thorax	NA	NA	male	NA	NA	NA	NA	male	thorax		NA	NA	France	Positive	2321	17124	598	26756	7622	175	0
SRR5580819	16098493	1223485468	76	ap20_rep1	WGS	RANDOM	GENOMIC	SINGLE	ILLUMINA	Illumina HiSeq 2000	PRJNA385500	SAMN06921431	ap20	worker bee	Blue Lake	1966	USA:CA, Humboldt Co., Blue lake, replicate 1	whole body	NA	NA	female	adult	NA	NA	adult	female	whole body		NA	NA	USA	Positive	194	2098	93	3022	2314	28	0
SRR5580854	58393405	5839340500	100	ap31_rep2	WGS	RANDOM	GENOMIC	SINGLE	ILLUMINA	Illumina HiSeq 2000	PRJNA385500	SAMN06921436	SRCD3A	worker bee	Blue Lake	1966	USA:CA, Humboldt Co., Blue lake, replicate 5A	whole body	NA	NA	female	adult	NA	NA	adult	female	whole body		NA	NA	USA	Positive	368	3905	252	5381	4607	15	0
SRR5580855	49640255	4964025500	100	ap20_rep2	WGS	RANDOM	GENOMIC	SINGLE	ILLUMINA	Illumina HiSeq 2000	PRJNA385500	SAMN06921437	SRCD5A	worker bee	Blue Lake	1966	USA:CA, Humboldt Co., Blue lake, replicate 1A	whole body	NA	NA	female	adult	NA	NA	adult	female	whole body		NA	NA	USA	Positive	338	3911	182	5088	4209	21	0
SRR5580859	60689220	6068922000	100	AP84	WGS	RANDOM	GENOMIC	SINGLE	ILLUMINA	Illumina HiSeq 2000	PRJNA385500	SAMN06921441	SRCD53C	worker bee	Blue Lake	1966	USA:CA, Humboldt Co., Blue lake, replicate 6	whole body	NA	NA	female	adult	NA	NA	adult	female	whole body		NA	NA	USA	Positive	5461	52849	2782	76648	4055	11	0
SRR11471417	8035882	2410764600	300	AR0504	WGS	RANDOM	GENOMIC	PAIRED	ILLUMINA	Illumina HiSeq 4000	PRJNA622776	SAMN14526541	AR0504	NA	foraging on vegetation	1/23/2018	Argentina	wing muscle	adult	35.4514 S 60.9022 W	female	NA	NA	NA	adult	female	thorax		-35.4514	-60.9022	Argentina	Positive	8786	14696	1531711	1513297	4825	19	0
SRR11471641	6534237	1960271100	300	CA0914	WGS	RANDOM	GENOMIC	PAIRED	ILLUMINA	Illumina HiSeq 4000	PRJNA622776	SAMN14526751	CA0914	NA	foraging on vegetation	6/25/2018	USA: California	wing muscle	adult	34.7411 N 120.2942 W	female	NA	NA	NA	adult	female	thorax		34.7411	-120.294	USA	Positive	22670	10990	180386	232479	8044	2	38
SRR11471659	5084164	1525249200	300	CA0502	WGS	RANDOM	GENOMIC	PAIRED	ILLUMINA	Illumina HiSeq 4000	PRJNA622776	SAMN14526734	CA0502	NA	foraging on vegetation	6/18/2018	USA: California	wing muscle	adult	34.0744 N 117.8728 W	female	NA	NA	NA	adult	female	thorax		34.0744	-117.873	USA	Positive	712	845	6879	8487	8285	12	28
SRR11471661	6369279	1910783700	300	AR0509	WGS	RANDOM	GENOMIC	PAIRED	ILLUMINA	Illumina HiSeq 4000	PRJNA622776	SAMN14526544	AR0509	NA	foraging on vegetation	1/23/2018	Argentina	wing muscle	adult	35.4083 S 60.9289 W	female	NA	NA	NA	adult	female	thorax		-35.4083	-60.9289	Argentina	Positive	17414	13181	1341730	1416510	5320	14	0
SRR14703899	69676137	21042193374	302	Ascu_RSA272	WGS	RANDOM	GENOMIC	PAIRED	ILLUMINA	HiSeq X Five	PRJNA729035	SAMN19109699	Ascu_RSA272	Apis_mellifera_Ascu_RSA272	Not Applicable	Not Collected	South Africa	1/2 Thorax	Adult	NA	male	NA	NA	NA	adult	male	thorax		NA	NA	South Africa	Positive	760	1660	41386	52612	8416	48	146
SRR5580778	35760657	3576065700	100	ap35_rep2	WGS	RANDOM	GENOMIC	SINGLE	ILLUMINA	Illumina HiSeq 2000	PRJNA385500	SAMN06921455	SRCD3C	worker bee	Coastal Sage	2002	USA:CA, LA Co. San Pedro, replicate 3	whole body	NA	NA	female	adult	NA	NA	adult	female	whole body		NA	NA	USA	Positive	31596	16785	242089	346494	1289	3	0
SRR5580782	26794686	2679468600	100	ap35_rep1	WGS	RANDOM	GENOMIC	SINGLE	ILLUMINA	Illumina HiSeq 2000	PRJNA385500	SAMN06921453	ap35	worker bee	Coastal Sage	2002	USA:CA, LA Co. San Pedro, replicate 1	whole body	NA	NA	female	adult	NA	NA	adult	female	whole body		NA	NA	USA	Positive	12702	8419	107293	136357	1617	13	0
SRR5580805	84266349	8426634900	100	SRCD49A	WGS	RANDOM	GENOMIC	SINGLE	ILLUMINA	Illumina HiSeq 2000	PRJNA385500	SAMN06921472	SRCD49A	worker bee	San Jacinto Mountains	2014	USA:CA, Riverside Co. San Jacinto Mnt. Idyllwild, Roadside corner Hwy 243 ad Marion Ridge Dr. next to Fire Station, replicate 3	whole body	NA	NA	female	adult	NA	NA	adult	female	whole body		NA	NA	USA	Positive	24267	16888	221644	311807	4534	3	7
SRR5580850	30372356	3037235600	100	SRCD54B	WGS	RANDOM	GENOMIC	SINGLE	ILLUMINA	Illumina HiSeq 2000	PRJNA385500	SAMN06921500	SRCD54B	worker bee	University Campus	1968	USA:CA, Yolo County, University of California, Davis, replicate 2	whole body	NA	NA	female	adult	NA	NA	adult	female	whole body		NA	NA	USA	Positive	160121	83834	1020460	1521567	5612	59	0
SRR5580862	58965121	5896512100	100	SRCD54A	WGS	RANDOM	GENOMIC	SINGLE	ILLUMINA	Illumina HiSeq 2000	PRJNA385500	SAMN06921444	SRCD54A	worker bee	Nature Center	2014	USA:CA, LA Co. Placeria Cyn. about .5 miles past the nature center, replicate 3	whole body	NA	NA	female	adult	NA	NA	adult	female	whole body		NA	NA	USA	Positive	87370	51534	643112	948324	2913	3	0
SRR3157131	11874013	2374802600	200	JFM25_ACAGTG_L004	WGS	unspecified	GENOMIC	PAIRED	ILLUMINA	Illumina HiSeq 2500	PRJNA311274	SAMN04481226	HN17	HN17	Hive	2014	France: Tarn	Thorax	Puape/Larvae	NA	male	NA	NA	NA	larval/pupal	male	thorax		NA	NA	France	Positive	117492	25134	5937	210625	1841	77	0
SRR12726879	71257981	17814495250	250	POOL_20_CAGATC_L008_	WGS	RANDOM	GENOMIC	PAIRED	ILLUMINA	Illumina HiSeq 2500	PRJNA666033	SAMN16277092	POOL_20	NA	hive	2015	Armenia	head	NA	NA	female	NA	NA	NA	NA	female	head		NA	NA	Armenia	Positive	349	703	2584	6921	6723	147	0
SRR12726913	71119191	17779797750	250	POOL_20_CAGATC_L006_	WGS	RANDOM	GENOMIC	PAIRED	ILLUMINA	Illumina HiSeq 2500	PRJNA666033	SAMN16277092	POOL_20	NA	hive	2015	Armenia	head	NA	NA	female	NA	NA	NA	NA	female	head		NA	NA	Armenia	Positive	362	732	2687	6843	6940	132	0
SRR12726890	71529746	17882436500	250	POOL_21_CCGTCC_L005_	WGS	RANDOM	GENOMIC	PAIRED	ILLUMINA	Illumina HiSeq 2500	PRJNA666033	SAMN16277093	POOL_21	NA	hive	2015	Malta	head	NA	NA	female	NA	NA	NA	NA	female	head		NA	NA	Malta	Positive	343	729	2649	6954	7045	127	0
SRR12726914	71344553	17836138250	250	POOL_20_CAGATC_L007_	WGS	RANDOM	GENOMIC	PAIRED	ILLUMINA	Illumina HiSeq 2500	PRJNA666033	SAMN16277092	POOL_20	NA	hive	2015	Armenia	head	NA	NA	female	NA	NA	NA	NA	female	head		NA	NA	Armenia	Positive	349	724	2671	6638	6905	137	0
SRR3157126	8837019	1767403800	200	JFM20_GTTTCG_L001	WGS	unspecified	GENOMIC	PAIRED	ILLUMINA	Illumina HiSeq 2500	PRJNA311274	SAMN04481221	HN12	HN12	Hive	2014	France: Tarn	Thorax	Puape/Larvae	NA	male	NA	NA	NA	larval/pupal	male	thorax		NA	NA	France	Positive	1315	528	100	3662	4011	104	0
SRR10571959	66988156	20096446800	300	9_P1_E12	WGS	unspecified	GENOMIC	PAIRED	ILLUMINA	Illumina NovaSeq 6000	PRJNA592197	SAMN13415887	Backcross_offspring#9	RSA2017_248_3	RSA2017_248	1/29/2018	South Africa: Stellenbosch	larva	NA	NA	female	NA	NA	NA	larval/pupal	female	NA		NA	NA	South Africa	Positive	63	517	4464	6021	8917	89	283
SRR3157129	13653042	2730608400	200	JFM23_TTAGGC_L004	WGS	unspecified	GENOMIC	PAIRED	ILLUMINA	Illumina HiSeq 2500	PRJNA311274	SAMN04481224	HN15	HN15	Hive	2014	France: Tarn	Thorax	Puape/Larvae	NA	male	NA	NA	NA	larval/pupal	male	thorax		NA	NA	France	Positive	607	327	137	1898	2426	0	0
SRR5580827	21897226	2189722600	100	ap31_rep1	WGS	RANDOM	GENOMIC	SINGLE	ILLUMINA	Illumina HiSeq 2000	PRJNA385500	SAMN06921435	ap31	worker bee	Blue Lake	1966	USA:CA, Humboldt Co., Blue lake, replicate 5	whole body	NA	NA	female	adult	NA	NA	adult	female	whole body		NA	NA	USA	Positive	152	1553	63	1739	3379	50	0
SRR14703834	54316083	16403457066	302	Aint_916	WGS	RANDOM	GENOMIC	PAIRED	ILLUMINA	HiSeq X Five	PRJNA729035	SAMN19109575	Aint_916	Apis_mellifera_Aint_916	Not Applicable	Not Collected	Morocco: Asilah	Previously Extracted DNA	Adult	35.470011 N 6.029983 W	female	NA	NA	NA	adult	female	NA		35.47	-6.02998	Morocco	Positive	302	668	1868	5416	8044	66	19
SRR11038162	30747109	9285626918	302	Sample 5	WGS	RANDOM PCR	GENOMIC	PAIRED	ILLUMINA	Illumina HiSeq 4000	PRJNA605407	SAMN14056723	Carniolan15	Honey Bee	Colony	2018-03	USA:Louisiana	Whole body	NA	NA	female	NA	NA	NA	NA	female	whole body		NA	NA	USA	Positive	2765	549	134	4532	10201	79	0
SRR11038090	39059187	11795874474	302	HILO_Sb01	WGS	RANDOM PCR	GENOMIC	PAIRED	ILLUMINA	Illumina HiSeq 4000	PRJNA605407	SAMN14056809	Hilo7	Honey Bee	Colony	2019-11	USA:Louisiana	Whole body	NA	NA	female	NA	NA	NA	NA	female	whole body		NA	NA	USA	Positive	1627	840	85	3590	7361	0	0
ERR5665181	13554386	3414587274	251	unspecified	WGS	other	GENOMIC	PAIRED	ILLUMINA	Illumina HiSeq 3000	PRJEB34590	SAMEA7109121	SAMEA7109121	NA	NA	1959	Switzerland	NA	NA	NA	worker	NA	NA	NA	NA	female	NA		NA	NA	Switzerland	Positive	148	3174	64	2221	7355	0	0
SRR5580857	14170519	1417051900	100	ap29_rep2	WGS	RANDOM	GENOMIC	SINGLE	ILLUMINA	Illumina HiSeq 2000	PRJNA385500	SAMN06921439	SRCD52B	worker bee	Blue Lake	1966	USA:CA, Humboldt Co., Blue lake, replicate 3A	whole body	NA	NA	female	adult	NA	NA	adult	female	whole body		NA	NA	USA	Positive	111	1377	62	1318	4373	5	0
SRR12726902	76376133	19094033250	250	POOL_17_GTGAAA_L001_	WGS	RANDOM	GENOMIC	PAIRED	ILLUMINA	Illumina HiSeq 2500	PRJNA666033	SAMN16277089	POOL_17	NA	hive	2015	Romania: Moldova	head	NA	NA	female	NA	NA	NA	NA	female	head		NA	NA	Romania	Positive	2068	372	66	2928	8578	90	0
SRR12726900	76358010	19089502500	250	POOL_16_CTTGTA_L004_	WGS	RANDOM	GENOMIC	PAIRED	ILLUMINA	Illumina HiSeq 2500	PRJNA666033	SAMN16277088	POOL_16	NA	hive	2015	Bulgaria	head	NA	NA	female	NA	NA	NA	NA	female	head		NA	NA	Bulgaria	Positive	2141	322	59	2860	8523	90	0
SRR12726898	77197598	19299399500	250	POOL_16_CTTGTA_L002_	WGS	RANDOM	GENOMIC	PAIRED	ILLUMINA	Illumina HiSeq 2500	PRJNA666033	SAMN16277088	POOL_16	NA	hive	2015	Bulgaria	head	NA	NA	female	NA	NA	NA	NA	female	head		NA	NA	Bulgaria	Positive	2010	341	74	2726	8501	74	0
SRR12726899	76659726	19164931500	250	POOL_16_CTTGTA_L003_	WGS	RANDOM	GENOMIC	PAIRED	ILLUMINA	Illumina HiSeq 2500	PRJNA666033	SAMN16277088	POOL_16	NA	hive	2015	Bulgaria	head	NA	NA	female	NA	NA	NA	NA	female	head		NA	NA	Bulgaria	Positive	2005	377	60	2674	8497	80	0
SRR12726915	73766548	18441637000	250	Pool2_CTTGTA_L004_	WGS	RANDOM	GENOMIC	PAIRED	ILLUMINA	Illumina HiSeq 2500	PRJNA666033	SAMN16277074	POOL_2	NA	hive	2015	Spain: north	head	NA	NA	female	NA	NA	NA	NA	female	head		NA	NA	Spain	Positive	28	354	1880	2097	7351	84	2
SRR11038105	29327572	8856926744	302	Sample 35	WGS	RANDOM PCR	GENOMIC	PAIRED	ILLUMINA	Illumina HiSeq 4000	PRJNA605407	SAMN14056753	Italian2_11	Honey Bee	Colony	2018-03	USA:Louisiana	Whole body	NA	NA	female	NA	NA	NA	NA	female	whole body		NA	NA	USA	Positive	1239	861	93	2220	8371	124	0
ERR5665173	13929875	3670707485	263	unspecified	WGS	other	GENOMIC	PAIRED	ILLUMINA	Illumina HiSeq 3000	PRJEB34590	SAMEA7109125	SAMEA7109125	NA	NA	1954	Switzerland	NA	NA	NA	worker	NA	NA	NA	NA	female	NA		NA	NA	Switzerland	Positive	93	1140	49	1634	6056	0	0
SRR5580863	72847934	7284793400	100	SRCD6B	WGS	RANDOM	GENOMIC	SINGLE	ILLUMINA	Illumina HiSeq 2000	PRJNA385500	SAMN06921445	SRCD6B	worker bee	Residential Area	2014	USA:CA, LA Co. Placeria Cyn. Residential area 25227 Running Horse Rd., replicate 1	whole body	NA	NA	female	adult	NA	NA	adult	female	whole body		NA	NA	USA	Positive	113	248	813	1223	5216	9	2
ERR5665175	9908767	2301848264	232	unspecified	WGS	other	GENOMIC	PAIRED	ILLUMINA	Illumina HiSeq 3000	PRJEB34590	SAMEA7109119	SAMEA7109119	NA	NA	1947	Switzerland	NA	NA	NA	worker	NA	NA	NA	NA	female	NA		NA	NA	Switzerland	Positive	70	850	30	969	4837	0	0
SRR5580821	22641490	2264149000	100	ap29_rep1	WGS	RANDOM	GENOMIC	SINGLE	ILLUMINA	Illumina HiSeq 2000	PRJNA385500	SAMN06921433	ap29	worker bee	Blue Lake	1966	USA:CA, Humboldt Co., Blue lake, replicate 3	whole body	NA	NA	female	adult	NA	NA	adult	female	whole body		NA	NA	USA	Positive	46	697	27	566	3422	33	0
SRR15173728	14788661	4436598300	300	ITA16A_CCGTCC_L004	WGS	size fractionation	GENOMIC	PAIRED	ILLUMINA	Illumina HiSeq 2500	PRJNA311274	SAMN20257147	ITA16A	ITA16A	Hive	2014	Italy	thorax	NA	NA	male	NA	NA	NA	NA	male	thorax		NA	NA	Italy	Positive	1065	315	26	1795	8583	205	0
ERR5665168	11629276	2872687324	247	unspecified	WGS	other	GENOMIC	PAIRED	ILLUMINA	Illumina HiSeq 3000	PRJEB34590	SAMEA7109122	SAMEA7109122	NA	NA	1947	Switzerland	NA	NA	NA	worker	NA	NA	NA	NA	female	NA		NA	NA	Switzerland	Positive	41	660	28	804	4163	0	0
SRR5115500	14391936	3626767872	252	P1862_108_MKF_13	WGS	RANDOM	GENOMIC	PAIRED	ILLUMINA	Illumina HiSeq 2500	PRJNA357367	SAMN06142958	MKF 13	Apis mellifera monticola	forest colonies	9/1/2009	Kenya: Mt Kenya forest highland	thorax	adult	0.20088 S 37.48970 E	female	NA	NA	NA	adult	female	thorax		-0.20088	37.4897	Kenya	Positive	24	192	900	1163	6229	32	67
ERR5665187	15712650	4181072271	266	unspecified	WGS	other	GENOMIC	PAIRED	ILLUMINA	Illumina HiSeq 3000	PRJEB34590	SAMEA7109115	SAMEA7109115	NA	NA		Switzerland	NA	NA	NA	worker	NA	NA	NA	NA	female	NA		NA	NA	Switzerland	Positive	22	1955	17	247	6386	0	0
ERR5665183	12380324	3140778171	253	unspecified	WGS	other	GENOMIC	PAIRED	ILLUMINA	Illumina HiSeq 3000	PRJEB34590	SAMEA7109116	SAMEA7109116	NA	NA	1958	Switzerland	NA	NA	NA	worker	NA	NA	NA	NA	female	NA		NA	NA	Switzerland	Positive	88	1230	42	1419	8101	0	0
SRR13312552	32157763	6495749044	201	S2825Nr5	WGS	RANDOM	METAGENOMIC	PAIRED	ILLUMINA	Illumina NovaSeq 6000	PRJNA688214	SAMN17170463	prepupa	Honeybee prepupa	Comb	2020-07	Poland: Lubin	Intestine	prepupa	NA	female	NA	NA	Intestine	NA	female	abdomen		NA	NA	Poland	Positive	639	318	50	1080	6145	82	0
ERR5665172	18364539	5027548462	273	unspecified	WGS	other	GENOMIC	PAIRED	ILLUMINA	Illumina HiSeq 3000	PRJEB34590	SAMEA7109118	SAMEA7109118	NA	NA	1954	Switzerland	NA	NA	NA	worker	NA	NA	NA	NA	female	NA		NA	NA	Switzerland	Positive	82	1046	14	990	6490	0	0
ERR5665171	16873978	4544909955	269	unspecified	WGS	other	GENOMIC	PAIRED	ILLUMINA	Illumina HiSeq 3000	PRJEB34590	SAMEA7109112	SAMEA7109112	NA	NA	1950	Switzerland	NA	NA	NA	worker	NA	NA	NA	NA	female	NA		NA	NA	Switzerland	Positive	0	1779	6	110	6368	0	0
ERR5665185	14333403	3773350341	263	unspecified	WGS	other	GENOMIC	PAIRED	ILLUMINA	Illumina HiSeq 3000	PRJEB34590	SAMEA7109109	SAMEA7109109	NA	NA	1950	Switzerland	NA	NA	NA	worker	NA	NA	NA	NA	female	NA		NA	NA	Switzerland	Positive	86	1092	28	1113	7869	0	0
SRR5580802	39105681	3910568100	100	SRCD54C	WGS	RANDOM	GENOMIC	SINGLE	ILLUMINA	Illumina HiSeq 2000	PRJNA385500	SAMN06921467	SRCD54C	worker bee	Riverside County	2014	USA:CA, Riverside Co. Riverside County Fire Station23, replicate 1	whole body	NA	NA	female	adult	NA	NA	adult	female	whole body		NA	NA	USA	Positive	53	304	498	578	5072	8	3
SRR11471401	6560217	1968065100	300	CA0220	WGS	RANDOM	GENOMIC	PAIRED	ILLUMINA	Illumina HiSeq 4000	PRJNA622776	SAMN14526717	CA0220	NA	foraging on vegetation	8/4/2018	USA: California	wing muscle	adult	33.2511 N 117.1306 W	female	NA	NA	NA	adult	female	thorax		33.2511	-117.131	USA	Positive	96	509	1027	1338	10852	14	23
ERR5665176	10823818	2663099538	246	unspecified	WGS	other	GENOMIC	PAIRED	ILLUMINA	Illumina HiSeq 3000	PRJEB34590	SAMEA7109120	SAMEA7109120	NA	NA	1958	Switzerland	NA	NA	NA	worker	NA	NA	NA	NA	female	NA		NA	NA	Switzerland	Positive	752	59	28	1037	7453	0	0
ERR5665170	13964940	3519751425	252	unspecified	WGS	other	GENOMIC	PAIRED	ILLUMINA	Illumina HiSeq 3000	PRJEB34590	SAMEA7109126	SAMEA7109126	NA	NA	1949	Switzerland	NA	NA	NA	worker	NA	NA	NA	NA	female	NA		NA	NA	Switzerland	Positive	52	565	32	443	4625	0	0
SRR3157095	6537780	1307556000	200	NM1_ATCACG_L007	WGS	unspecified	GENOMIC	PAIRED	ILLUMINA	Illumina HiSeq 2000	PRJNA311274	SAMN04481190	RJ11	RJ11	Hive	2014	France	Thorax	Puape/Larvae	NA	male	NA	NA	NA	larval/pupal	male	thorax		NA	NA	France	Positive	248	190	14	532	4220	295	0
ERR5665180	17491837	4752362779	271	unspecified	WGS	other	GENOMIC	PAIRED	ILLUMINA	Illumina HiSeq 3000	PRJEB34590	SAMEA7109113	SAMEA7109113	NA	NA	1959	Switzerland	NA	NA	NA	worker	NA	NA	NA	NA	female	NA		NA	NA	Switzerland	Positive	10	1661	0	161	8152	0	0
ERR5665182	14598973	3782525625	259	unspecified	WGS	other	GENOMIC	PAIRED	ILLUMINA	Illumina HiSeq 3000	PRJEB34590	SAMEA7109123	SAMEA7109123	NA	NA	1959	Switzerland	NA	NA	NA	worker	NA	NA	NA	NA	female	NA		NA	NA	Switzerland	Positive	14	1492	6	144	7399	0	0
SRR11471566	6541423	1962426900	300	AR0907	WGS	RANDOM	GENOMIC	PAIRED	ILLUMINA	Illumina HiSeq 4000	PRJNA622776	SAMN14526567	AR0907	NA	foraging on vegetation	1/22/2018	Argentina	wing muscle	adult	34.1978 S 60.7224 W	female	NA	NA	NA	adult	female	thorax		-34.1978	-60.7224	Argentina	Positive	9	418	976	948	10953	28	0
SRR11038107	34206247	10330286594	302	Sample 33	WGS	RANDOM PCR	GENOMIC	PAIRED	ILLUMINA	Illumina HiSeq 4000	PRJNA605407	SAMN14056751	Italian2_9	Honey Bee	Colony	2018-03	USA:Louisiana	Whole body	NA	NA	female	NA	NA	NA	NA	female	whole body		NA	NA	USA	Positive	316	770	16	469	7635	169	0
SRR14703930	47742151	14418129602	302	Apom_KyrgB2	WGS	RANDOM	GENOMIC	PAIRED	ILLUMINA	HiSeq X Five	PRJNA729035	SAMN19109613	Apom_KyrgB2	Apis_mellifera_Apom_KyrgB2	Not Applicable	2008	Kyrgyzstan: Dshuukn Valley	1/2 Thorax	Adult	NA	female	NA	NA	NA	adult	female	thorax		NA	NA	Kyrgyzstan	Positive	17	883	0	71	4906	120	0
SRR5580781	26013735	2601373500	100	ap43_rep1	WGS	RANDOM	GENOMIC	SINGLE	ILLUMINA	Illumina HiSeq 2000	PRJNA385500	SAMN06921450	ap43	worker bee	Placerita Canyon Natural Area	1999	USA:CA, LA Co. Placerita Cyn. Nat. Area, replicate 3	whole body	NA	NA	female	adult	NA	NA	adult	female	whole body		NA	NA	USA	Positive	88	58	5	176	1705	41	0
SRR5580816	48096605	4809660500	100	ap53_rep2	WGS	RANDOM	GENOMIC	SINGLE	ILLUMINA	Illumina HiSeq 2000	PRJNA385500	SAMN06921484	SRCD5D	worker bee	Nature Reserve	1996	USA:CA, Solano Co. Stebbins Cold Cyn. Reserve 38 30'N 122 08'W 11 km W. Winters, replicate 2B	whole body	NA	NA	female	adult	NA	NA	adult	female	whole body		NA	NA	USA	Positive	25	527	12	347	4939	6	0
ERR5665167	25686977	7200027035	280	unspecified	WGS	other	GENOMIC	PAIRED	ILLUMINA	Illumina HiSeq 3000	PRJEB34590	SAMEA7109107	SAMEA7109107	NA	NA	1947	Switzerland	NA	NA	NA	worker	NA	NA	NA	NA	female	NA		NA	NA	Switzerland	Positive	74	679	37	769	8901	0	0
SRR11471409	7054248	2116274400	300	CA0230	WGS	RANDOM	GENOMIC	PAIRED	ILLUMINA	Illumina HiSeq 4000	PRJNA622776	SAMN14526710	CA0230	NA	foraging on vegetation	8/4/2018	USA: California	wing muscle	adult	33.1072 N 117.1661 W	female	NA	NA	NA	adult	female	thorax		33.1072	-117.166	USA	Positive	3	385	734	667	10465	26	2
SRR6281804	10549631	3164889300	300	xj2	WGS	RANDOM	GENOMIC	PAIRED	ILLUMINA	HiSeq X Ten	PRJNA418015	SAMN08013130	XJHF-2	worker bee	not applicable	2016-04	China: Xinjiang, replicate 2	whole body	NA	NA	female	NA	NA	NA	NA	female	whole body		NA	NA	China	Positive	502	411	18	800	10165	131	0
SRR10571979	57813902	17344170600	300	39_P4_F8	WGS	unspecified	GENOMIC	PAIRED	ILLUMINA	Illumina NovaSeq 6000	PRJNA592197	SAMN13415916	Backcross_offspring#39	RSA2017_248_32	RSA2017_248	1/29/2018	South Africa: Stellenbosch	larva	NA	NA	female	NA	NA	NA	larval/pupal	female	NA		NA	NA	South Africa	Positive	8	339	482	551	8112	76	211
ERR5665179	11391781	2735246331	240	unspecified	WGS	other	GENOMIC	PAIRED	ILLUMINA	Illumina HiSeq 3000	PRJEB34590	SAMEA7109124	SAMEA7109124	NA	NA	1951	Switzerland	NA	NA	NA	worker	NA	NA	NA	NA	female	NA		NA	NA	Switzerland	Positive	42	320	10	422	4823	0	0
SRR14703837	59811858	18063181116	302	Aint_908	WGS	RANDOM	GENOMIC	PAIRED	ILLUMINA	HiSeq X Five	PRJNA729035	SAMN19109572	Aint_908	Apis_mellifera_Aint_908	Not Applicable	Not Collected	Morocco: Asilah	Previously Extracted DNA	Adult	35.470011 N 6.029983 W	female	NA	NA	NA	adult	female	NA		35.47	-6.02998	Morocco	Positive	37	384	213	648	7915	72	70
SRR14703835	64245597	19402170294	302	Aint_915	WGS	RANDOM	GENOMIC	PAIRED	ILLUMINA	HiSeq X Five	PRJNA729035	SAMN19109574	Aint_915	Apis_mellifera_Aint_915	Not Applicable	Not Collected	Morocco: Asilah	Previously Extracted DNA	Adult	35.470011 N 6.029983 W	female	NA	NA	NA	adult	female	NA		35.47	-6.02998	Morocco	Positive	59	316	263	737	8725	82	36
SRR11038114	25334299	7650958298	302	Sample 27	WGS	RANDOM PCR	GENOMIC	PAIRED	ILLUMINA	Illumina HiSeq 4000	PRJNA605407	SAMN14056745	Italian2_3	Honey Bee	Colony	2018-03	USA:Louisiana	Whole body	NA	NA	female	NA	NA	NA	NA	female	whole body		NA	NA	USA	Positive	358	362	15	628	8885	190	2
SRR3157122	8242975	1648595000	200	JFM17_GTCCGC_L001	WGS	unspecified	GENOMIC	PAIRED	ILLUMINA	Illumina HiSeq 2500	PRJNA311274	SAMN04481217	HN8	HN8	Hive	2014	France: Tarn	Thorax	Puape/Larvae	NA	male	NA	NA	NA	larval/pupal	male	thorax		NA	NA	France	Positive	106	105	13	320	3694	0	0
SRR1425440	30791532	6158306400	200	A20	WGS	RANDOM	GENOMIC	PAIRED	ILLUMINA	Illumina HiSeq 2000	PRJNA252997	SAMN02865970	A20	NA	NA	NA	NA	upper-body	NA	NA	male	1	NA	NA	NA	male	NA		NA	NA	NA	Positive	66	234	5	166	5416	9	0
SRR5580846	39749565	3974956500	100	SRCD49C	WGS	RANDOM	GENOMIC	SINGLE	ILLUMINA	Illumina HiSeq 2000	PRJNA385500	SAMN06921496	SRCD49C	worker bee	Campus Garden	2014	USA:CA, Yolo County, University of California, Davis, replicate 2 modern	whole body	NA	NA	female	adult	NA	NA	adult	female	whole body		NA	NA	USA	Positive	2	282	23	27	5211	3	0
SRR11471439	9143323	2742996900	300	AR0305	WGS	RANDOM	GENOMIC	PAIRED	ILLUMINA	Illumina HiSeq 4000	PRJNA622776	SAMN14526539	AR0305	NA	foraging on vegetation	1/23/2018	Argentina	wing muscle	adult	35.7203 S 60.8742 W	female	NA	NA	NA	adult	female	thorax		-35.7203	-60.8742	Argentina	Positive	2	286	135	121	9166	20	0
SRR11038118	25459934	7688900068	302	Sample 66	WGS	RANDOM PCR	GENOMIC	PAIRED	ILLUMINA	Illumina HiSeq 4000	PRJNA605407	SAMN14056784	Russian6	Honey Bee	Colony	2018-03	USA:Louisiana	Whole body	NA	NA	female	NA	NA	NA	NA	female	whole body		NA	NA	USA	Positive	12	288	2	28	9817	171	3
SRR11038157	29439414	8890703028	302	Sample 45	WGS	RANDOM PCR	GENOMIC	PAIRED	ILLUMINA	Illumina HiSeq 4000	PRJNA605407	SAMN14056763	MNHyg9	Honey Bee	Colony	2018-03	USA:Louisiana	Whole body	NA	NA	female	NA	NA	NA	NA	female	whole body		NA	NA	USA	Positive	43	291	9	74	8561	110	17
SRR14703803	70416944	21265917088	302	Alamark979	WGS	RANDOM	GENOMIC	PAIRED	ILLUMINA	HiSeq X Five	PRJNA729035	SAMN19109584	Alamark979	Apis_mellifera_Alamark979	Not Applicable	1993	Egypt: Assiut	Previously Extracted DNA	Adult	27.180744 N 31.183397 E	female	NA	NA	NA	adult	female	NA		27.1807	31.1834	Egypt	Positive	14	314	116	322	8711	22	60
SRR12726911	72238899	18059724750	250	POOL_19_TGACCA_L008_	WGS	RANDOM	GENOMIC	PAIRED	ILLUMINA	Illumina HiSeq 2500	PRJNA666033	SAMN16277091	POOL_19	NA	hive	2015	Isle of Man	head	NA	NA	female	NA	NA	NA	NA	female	head		NA	NA	Great Britain	Positive	4	324	2	40	8094	90	0
SRR11471588	7332840	2199852000	300	CA1416	WGS	RANDOM	GENOMIC	PAIRED	ILLUMINA	Illumina HiSeq 4000	PRJNA622776	SAMN14526797	CA1416	NA	foraging on vegetation	6/27/2018	USA: California	wing muscle	adult	36.6178 N 121.5247 W	female	NA	NA	NA	adult	female	thorax		36.6178	-121.525	USA	Positive	2	347	31	55	11173	34	0
SRR11038141	32645009	9858792718	302	Sample 74	WGS	RANDOM PCR	GENOMIC	PAIRED	ILLUMINA	Illumina HiSeq 4000	PRJNA605407	SAMN14056792	Italian3_2	Honey Bee	Colony	2018-03	USA:Louisiana	Whole body	NA	NA	female	NA	NA	NA	NA	female	whole body		NA	NA	USA	Positive	91	351	5	176	9488	119	2
SRR12726897	48466462	12116615500	250	POOL_16_CTTGTA_L001_	WGS	RANDOM	GENOMIC	PAIRED	ILLUMINA	Illumina HiSeq 2500	PRJNA666033	SAMN16277088	POOL_16	NA	hive	2015	Bulgaria	head	NA	NA	female	NA	NA	NA	NA	female	head		NA	NA	Bulgaria	Positive	5	352	0	33	8119	114	0
SRR12726912	72588480	18147120000	250	POOL_20_CAGATC_L005_	WGS	RANDOM	GENOMIC	PAIRED	ILLUMINA	Illumina HiSeq 2500	PRJNA666033	SAMN16277092	POOL_20	NA	hive	2015	Armenia	head	NA	NA	female	NA	NA	NA	NA	female	head		NA	NA	Armenia	Positive	6	355	0	35	8227	94	0
SRR11471640	6114644	1834393200	300	CA0912	WGS	RANDOM	GENOMIC	PAIRED	ILLUMINA	Illumina HiSeq 4000	PRJNA622776	SAMN14526752	CA0912	NA	foraging on vegetation	6/25/2018	USA: California	wing muscle	adult	34.7553 N 120.3572 W	female	NA	NA	NA	adult	female	thorax		34.7553	-120.357	USA	Positive	2	369	85	80	10777	32	0
SRR11471416	6770221	2031066300	300	CA0112	WGS	RANDOM	GENOMIC	PAIRED	ILLUMINA	Illumina HiSeq 4000	PRJNA622776	SAMN14526703	CA0112	NA	foraging on vegetation	6/17/2018	USA: California	wing muscle	adult	32.7614 N 116.9175 W	female	NA	NA	NA	adult	female	thorax		32.7614	-116.918	USA	Positive	2	375	125	85	10473	14	25
SRR11471633	6066616	1819984800	300	CA0902	WGS	RANDOM	GENOMIC	PAIRED	ILLUMINA	Illumina HiSeq 4000	PRJNA622776	SAMN14526758	CA0902	NA	foraging on vegetation	6/25/2018	USA: California	wing muscle	adult	34.9533 N 120.4522 W	female	NA	NA	NA	adult	female	thorax		34.9533	-120.452	USA	Positive	4	377	116	176	10392	30	2
SRR11471515	9270391	2781117300	300	AR1409	WGS	RANDOM	GENOMIC	PAIRED	ILLUMINA	Illumina HiSeq 4000	PRJNA622776	SAMN14526613	AR1409	NA	foraging on vegetation	1/16/2018	Argentina	wing muscle	adult	32.2506 S 60.9867 W	female	NA	NA	NA	adult	female	thorax		-32.2506	-60.9867	Argentina	Positive	2	379	78	61	10222	36	0
SRR11471494	7066269	2119880700	300	AR1906	WGS	RANDOM	GENOMIC	PAIRED	ILLUMINA	Illumina HiSeq 4000	PRJNA622776	SAMN14526636	AR1906	NA	foraging on vegetation	1/18/2018	Argentina	wing muscle	adult	31.2003 S 60.16 W	female	NA	NA	NA	adult	female	thorax		-31.2003	-60.16	Argentina	Positive	7	405	64	52	10969	20	19
SRR14703867	70963861	21431086022	302	Ayem_eth4	WGS	RANDOM	GENOMIC	PAIRED	ILLUMINA	HiSeq X Five	PRJNA729035	SAMN19109602	Ayem_eth4	Apis_mellifera_Ayem_eth4	Not Applicable	2006	Ethiopia: Daba	1/2 thorax	Adult	9.383214 N 41.965539 E	female	NA	NA	NA	adult	female	thorax		9.38321	41.9655	Ethiopia	Positive	4	418	41	83	8789	38	138
SRR11471653	5720677	1716203100	300	CA0519	WGS	RANDOM	GENOMIC	PAIRED	ILLUMINA	Illumina HiSeq 4000	PRJNA622776	SAMN14526740	CA0519	NA	foraging on vegetation	6/18/2018	USA: California	wing muscle	adult	34.1469 N 118.1308 W	female	NA	NA	NA	adult	female	thorax		34.1469	-118.131	USA	Positive	2	426	42	72	11290	37	0
SRR11471438	6145591	1843677300	300	AR2615	WGS	RANDOM	GENOMIC	PAIRED	ILLUMINA	Illumina HiSeq 4000	PRJNA622776	SAMN14526683	AR2615	NA	foraging on vegetation	1/19/2018	Argentina	wing muscle	adult	29.0525 S 59.6019 W	female	NA	NA	NA	adult	female	thorax		-29.0525	-59.6019	Argentina	Positive	2	444	55	58	11017	17	45
SRR14703872	45257602	13667795804	302	Auni_mad17	WGS	RANDOM	GENOMIC	PAIRED	ILLUMINA	HiSeq X Five	PRJNA729035	SAMN19109639	Auni_mad17	Apis_mellifera_Auni_mad17	Not Applicable	2009	Madagascar	1/2 head	Adult	NA	female	NA	NA	NA	adult	female	head		NA	NA	Madagascar	Positive	7	448	162	199	7522	24	20
SRR11471590	5506807	1652042100	300	CA1408	WGS	RANDOM	GENOMIC	PAIRED	ILLUMINA	Illumina HiSeq 4000	PRJNA622776	SAMN14526795	CA1408	NA	foraging on vegetation	6/24/2018	USA: California	wing muscle	adult	36.5611 N 121.5078 W	female	NA	NA	NA	adult	female	thorax		36.5611	-121.508	USA	Positive	6	465	68	72	11251	35	0
SRR14703796	77629405	23444080310	302	Aada_se401	WGS	RANDOM	GENOMIC	PAIRED	ILLUMINA	HiSeq X Five	PRJNA729035	SAMN19109689	Aada_se401	Apis_mellifera_Aada_se401	Not Applicable	Not Collected	Senegal	1/2 thorax	Adult	NA	female	NA	NA	NA	adult	female	thorax		NA	NA	Senegal	Positive	3	473	87	95	8402	0	345
SRR11038111	36234772	10942901144	302	Sample 30	WGS	RANDOM PCR	GENOMIC	PAIRED	ILLUMINA	Illumina HiSeq 4000	PRJNA605407	SAMN14056748	Italian2_6	Honey Bee	Colony	2018-03	USA:Louisiana	Whole body	NA	NA	female	NA	NA	NA	NA	female	whole body		NA	NA	USA	Positive	158	643	13	249	8470	118	0
SRR11038137	26073645	7874240790	302	Sample 78	WGS	RANDOM PCR	GENOMIC	PAIRED	ILLUMINA	Illumina HiSeq 4000	PRJNA605407	SAMN14056796	Italian3_6	Honey Bee	Colony	2018-03	USA:Louisiana	Whole body	NA	NA	female	NA	NA	NA	NA	female	whole body		NA	NA	USA	Positive	403	383	20	644	9861	131	0
SRR14703833	71986541	21739935382	302	Aint_918	WGS	RANDOM	GENOMIC	PAIRED	ILLUMINA	HiSeq X Five	PRJNA729035	SAMN19109576	Aint_918	Apis_mellifera_Aint_918	Not Applicable	Not Collected	Morocco: Asilah	Previously Extracted DNA	Adult	35.470011 N 6.029983 W	female	NA	NA	NA	adult	female	NA		35.47	-6.02998	Morocco	Positive	7	344	16	66	8324	56	56
ERR1700789	9860779	2465194750	250	WGS	WGS	unspecified	GENOMIC	PAIRED	ILLUMINA	Illumina HiSeq 2500	PRJEB16533	SAMEA4521207	SAMEA4521207	NA	NA	Spring/Summer 2014	Switzerland	NA	pupae or larvae	NA	male	NA	NA	NA	larval/pupal	male	NA		NA	NA	Switzerland	Positive	25	1412	0	53	10465	215	0
ERR5665184	11056116	2561969722	231	unspecified	WGS	other	GENOMIC	PAIRED	ILLUMINA	Illumina HiSeq 3000	PRJEB34590	SAMEA7109127	SAMEA7109127	NA	NA		Switzerland	NA	NA	NA	worker	NA	NA	NA	NA	female	NA		NA	NA	Switzerland	Positive	24	314	9	252	4439	445	0
SRR5580790	78916717	7891671700	100	SRCD49B	WGS	RANDOM	GENOMIC	SINGLE	ILLUMINA	Illumina HiSeq 2000	PRJNA385500	SAMN06921462	SRCD49B	worker bee	Catalina Island	2014	USA:CA, Los Angeles Co., Catalina Is. Avalon; 236 Catalina Ave, replicate 4	whole body	NA	NA	female	adult	NA	NA	adult	female	whole body		NA	NA	USA	Positive	6	478	123	156	5929	3	3
SRR15173564	14770190	4431057000	300	POR9_ATCACG_L007	WGS	size fractionation	GENOMIC	PAIRED	ILLUMINA	Illumina HiSeq 2500	PRJNA311274	SAMN20257345	POR9	POR9	Hive	2014	France: Porquerolles	thorax	NA	NA	male	NA	NA	NA	NA	male	thorax		NA	NA	France	Positive	14	496	6	396	7563	0	0
SRR15173378	18344242	5503272600	300	BR21_GTCCGC_L001	WGS	size fractionation	GENOMIC	PAIRED	ILLUMINA	Illumina HiSeq 2500	PRJNA311274	SAMN20257027	BR21	BR21	Hive158	2014	France: Ariege	thorax	NA	NA	male	NA	NA	NA	NA	male	thorax		NA	NA	France	Positive	29	39	4	84	1295	71	0
SRR10571961	69671368	20901410400	300	7_P1_D7	WGS	unspecified	GENOMIC	PAIRED	ILLUMINA	Illumina NovaSeq 6000	PRJNA592197	SAMN13415885	Backcross_offspring#7	RSA2017_248_1	RSA2017_248	1/29/2018	South Africa: Stellenbosch	larva	NA	NA	female	NA	NA	NA	larval/pupal	female	NA		NA	NA	South Africa	Positive	10	445	268	326	8812	151	244
SRR10571993	73708827	22112648100	300	26_P4_A1	WGS	unspecified	GENOMIC	PAIRED	ILLUMINA	Illumina NovaSeq 6000	PRJNA592197	SAMN13415903	Backcross_offspring#26	RSA2017_248_19	RSA2017_248	1/29/2018	South Africa: Stellenbosch	larva	NA	NA	female	NA	NA	NA	larval/pupal	female	NA		NA	NA	South Africa	Positive	2	485	204	344	9027	170	248
SRR5580803	45150574	4515057400	100	ap34_rep2	WGS	RANDOM	GENOMIC	SINGLE	ILLUMINA	Illumina HiSeq 2000	PRJNA385500	SAMN06921466	SRCD3B	worker bee	Nature Preserve	1999	USA:CA, Riverside Co. 1000 Palms Oasis, replicate 3	whole body	NA	NA	female	adult	NA	NA	adult	female	whole body		NA	NA	USA	Positive	13	278	102	201	5253	15	0
SRR10571995	50896775	15269032500	300	24_P3_G2	WGS	unspecified	GENOMIC	PAIRED	ILLUMINA	Illumina NovaSeq 6000	PRJNA592197	SAMN13415901	Backcross_offspring#24	RSA2017_248_17	RSA2017_248	1/29/2018	South Africa: Stellenbosch	larva	NA	NA	female	NA	NA	NA	larval/pupal	female	NA		NA	NA	South Africa	Positive	4	397	262	345	8996	0	0
SRR15173946	16189780	4856934000	300	KF21_CGTACG_L002	WGS	size fractionation	GENOMIC	PAIRED	ILLUMINA	Illumina HiSeq 2500	PRJNA311274	SAMN20257286	KF21	KF21	Hive	2014	France: Tarn	thorax	NA	NA	male	NA	NA	NA	NA	male	thorax		NA	NA	France	Positive	81	250	14	404	7469	136	0
SRR15173492	11816921	3545076300	300	YC2_ATGTCA_L002	WGS	size fractionation	GENOMIC	PAIRED	ILLUMINA	Illumina HiSeq 2500	PRJNA311274	SAMN20257410	YC2	YC2	Hive	2014	France	thorax	NA	NA	male	NA	NA	NA	NA	male	thorax		NA	NA	France	Positive	196	312	10	400	9365	307	0
SRR15173775	10663063	3198918900	300	ESP10_GCCAAT_L007	WGS	size fractionation	GENOMIC	PAIRED	ILLUMINA	Illumina HiSeq 2500	PRJNA311274	SAMN20257104	ESP10	ESP10	Hive	2014	Spain: Central Transect 1	thorax	NA	NA	male	NA	NA	NA	NA	male	thorax		NA	NA	Spain	Positive	12	509	10	230	8345	0	0
SRR6347763	21899852	4379970400	200	WHAIPI005556-13	WGS	size fractionation	GENOMIC	PAIRED	ILLUMINA	Illumina HiSeq 2000	PRJNA381313	SAMN08132921	W22_WHAIPI005556-13_EHB	NA	NA	2013	USA	thorax	NA	NA	male	NA	NA	NA	NA	male	thorax		NA	NA	USA	Positive	2	157	81	94	3930	31	53
SRR12726885	109014866	27253716500	250	POOL_8_ACAGTG_L008_	WGS	RANDOM	GENOMIC	PAIRED	ILLUMINA	Illumina HiSeq 2500	PRJNA666033	SAMN16277080	POOL_8	NA	hive	2015	Slovenia: Croatia	head	NA	NA	female	NA	NA	NA	NA	female	head		NA	NA	Slovenia	Positive	120	274	2	154	6481	127	0
SRR5580786	29341707	2934170700	100	ap42_rep1	WGS	RANDOM	GENOMIC	SINGLE	ILLUMINA	Illumina HiSeq 2000	PRJNA385500	SAMN06921449	ap42	worker bee	Placerita Canyon Natural Area	1999	USA:CA, LA Co. Placerita Cyn. Nat. Area, replicate 2	whole body	NA	NA	female	adult	NA	NA	adult	female	whole body		NA	NA	USA	Positive	18	28	2	59	1266	20	8
ERR5665166	15186977	4039679441	265	unspecified	WGS	other	GENOMIC	PAIRED	ILLUMINA	Illumina HiSeq 3000	PRJEB34590	SAMEA7109114	SAMEA7109114	NA	NA	1955	Switzerland	NA	NA	NA	worker	NA	NA	NA	NA	female	NA		NA	NA	Switzerland	Positive	14	214	6	255	6218	2	0
SRR10571978	58215534	17464660200	300	40_P4_G6	WGS	unspecified	GENOMIC	PAIRED	ILLUMINA	Illumina NovaSeq 6000	PRJNA592197	SAMN13415917	Backcross_offspring#40	RSA2017_248_33	RSA2017_248	1/29/2018	South Africa: Stellenbosch	larva	NA	NA	female	NA	NA	NA	larval/pupal	female	NA		NA	NA	South Africa	Positive	2	290	178	250	9183	0	0
SRR11038115	29817537	9004896174	302	Sample 26	WGS	RANDOM PCR	GENOMIC	PAIRED	ILLUMINA	Illumina HiSeq 4000	PRJNA605407	SAMN14056744	Italian2_2	Honey Bee	Colony	2018-03	USA:Louisiana	Whole body	NA	NA	female	NA	NA	NA	NA	female	whole body		NA	NA	USA	Positive	74	406	6	172	8477	227	6
SRR11471606	6332615	1899784500	300	AR0110	WGS	RANDOM	GENOMIC	PAIRED	ILLUMINA	Illumina HiSeq 4000	PRJNA622776	SAMN14526524	AR0110	NA	foraging on vegetation	1/23/2018	Argentina	wing muscle	adult	36.2375 S 61.1325 W	female	NA	NA	NA	adult	female	thorax		-36.2375	-61.1325	Argentina	Positive	8	403	148	119	8913	63	0
SRR6281805	12719815	3815944500	300	xj3	WGS	RANDOM	GENOMIC	PAIRED	ILLUMINA	HiSeq X Ten	PRJNA418015	SAMN08013131	XJHF-3	worker bee	not applicable	2016-04	China: Xinjiang, replicate 3	whole body	NA	NA	female	NA	NA	NA	NA	female	whole body		NA	NA	China	Positive	112	320	9	212	8866	88	0
SRR11471543	6893950	2068185000	300	AR1101	WGS	RANDOM	GENOMIC	PAIRED	ILLUMINA	Illumina HiSeq 4000	PRJNA622776	SAMN14526588	AR1101	NA	foraging on vegetation	1/21/2018	Argentina	wing muscle	adult	33.2528 S 60.3461 W	female	NA	NA	NA	adult	female	thorax		-33.2528	-60.3461	Argentina	Positive	2	466	156	139	10454	11	8
SRR10571996	59279663	17783898900	300	23_P3_F6	WGS	unspecified	GENOMIC	PAIRED	ILLUMINA	Illumina NovaSeq 6000	PRJNA592197	SAMN13415900	Backcross_offspring#23	RSA2017_248_16	RSA2017_248	1/29/2018	South Africa: Stellenbosch	larva	NA	NA	female	NA	NA	NA	larval/pupal	female	NA		NA	NA	South Africa	Positive	6	385	108	160	9062	52	270
SRR5270369	89632963	8963296300	100	Kenya_S3	WGS	RANDOM	GENOMIC	SINGLE	ILLUMINA	Illumina HiSeq 2000	PRJNA294105	SAMN06342757	Kenya_S3	worker bee	not applicable	1995	Kenya: Africa replicate 3	whole body	NA	NA	female	adult	NA	NA	adult	female	whole body		NA	NA	Kenya	Positive	3	156	33	42	3380	0	17
SRR10305325	11234801	3392909902	302	UDHB003	WGS	unspecified	GENOMIC	PAIRED	ILLUMINA	Illumina HiSeq 2500	PRJNA578233	SAMN13053290	Urals Dark Honey Bee 3	Iglinsky district, Vladimir Kugeiko's apiary	Hive	7/26/2019	Russia:Bashkortostan	Thorax	Adult	54.7049917 N 56.6510389 E	male	1	NA	NA	adult	male	thorax		54.705	56.651	Russia	Positive	2	578	4	72	9679	157	0
SRR3157094	5025008	1005001600	200	FL9_GTCCGC_L004	WGS	unspecified	GENOMIC	PAIRED	ILLUMINA	Illumina HiSeq 2500	PRJNA311274	SAMN04481189	RJ10	RJ10	Hive	2014	France	Thorax	Puape/Larvae	NA	male	NA	NA	NA	larval/pupal	male	thorax		NA	NA	France	Positive	28	180	4	57	3983	168	0
SRR14703875	56318402	17008157404	302	Auni_mad13	WGS	RANDOM	GENOMIC	PAIRED	ILLUMINA	HiSeq X Five	PRJNA729035	SAMN19109636	Auni_mad13	Apis_mellifera_Auni_mad13	Not Applicable	2009	Madagascar	1/2 head	Adult	NA	female	NA	NA	NA	adult	female	head		NA	NA	Madagascar	Positive	4	421	31	72	7879	4	42
SRR15173569	29345775	8803732500	300	POR4_GTTTCG_merged	WGS	size fractionation	GENOMIC	PAIRED	ILLUMINA	Illumina HiSeq 2500	PRJNA311274	SAMN20257341	POR4	POR4	Hive	2014	France: Porquerolles	thorax	NA	NA	male	NA	NA	NA	NA	male	thorax		NA	NA	France	Positive	2	415	2	98	8281	136	0
SRR11471466	6659418	1997825400	300	AR2303	WGS	RANDOM	GENOMIC	PAIRED	ILLUMINA	Illumina HiSeq 4000	PRJNA622776	SAMN14526658	AR2303	NA	foraging on vegetation	1/18/2018	Argentina	wing muscle	adult	29.9094 S 59.8233 W	female	NA	NA	NA	adult	female	thorax		-29.9094	-59.8233	Argentina	Positive	4	427	99	97	10109	18	21
SRR15173774	12769691	3830907300	300	ESP11_CAGATC_L007	WGS	size fractionation	GENOMIC	PAIRED	ILLUMINA	Illumina HiSeq 2500	PRJNA311274	SAMN20257105	ESP11	ESP11	Hive	2014	Spain: Central Transect 1	thorax	NA	NA	male	NA	NA	NA	NA	male	thorax		NA	NA	Spain	Positive	2	424	8	84	8524	0	0
SRR6281803	10547645	3164293500	300	xj1	WGS	RANDOM	GENOMIC	PAIRED	ILLUMINA	HiSeq X Ten	PRJNA418015	SAMN08013129	XJHF-1	worker bee	not applicable	2016-04	China: Xinjiang, replicate 1	whole body	NA	NA	female	NA	NA	NA	NA	female	whole body		NA	NA	China	Positive	76	289	0	127	8206	138	2
SRR11038149	28794998	8696089396	302	Sample 67	WGS	RANDOM PCR	GENOMIC	PAIRED	ILLUMINA	Illumina HiSeq 4000	PRJNA605407	SAMN14056785	Russian7	Honey Bee	Colony	2018-03	USA:Louisiana	Whole body	NA	NA	female	NA	NA	NA	NA	female	whole body		NA	NA	USA	Positive	56	416	5	99	9699	201	0
SRR6236903	8752993	2625897900	300	MAD34_CAGATC_L005	WGS	size fractionation	GENOMIC	PAIRED	ILLUMINA	Illumina HiSeq 2500	PRJNA311274	SAMN07956285	MAD34	MAD34	Hive	2014	Madagascar	Thorax	Puape/Larvae	NA	male	NA	NA	NA	larval/pupal	male	thorax		NA	NA	Madagascar	Positive	6	262	59	89	7291	30	20
SRR11471601	6012108	1803632400	300	CA1305	WGS	RANDOM	GENOMIC	PAIRED	ILLUMINA	Illumina HiSeq 4000	PRJNA622776	SAMN14526785	CA1305	NA	foraging on vegetation	6/26/2018	USA: California	wing muscle	adult	36.1653 N 120.8856 W	female	NA	NA	NA	adult	female	thorax		36.1653	-120.886	USA	Positive	3	351	116	167	11437	49	0
SRR11471559	6451731	1935519300	300	AR0901	WGS	RANDOM	GENOMIC	PAIRED	ILLUMINA	Illumina HiSeq 4000	PRJNA622776	SAMN14526573	AR0901	NA	foraging on vegetation	1/22/2018	Argentina	wing muscle	adult	34.1315 S 60.6625 W	female	NA	NA	NA	adult	female	thorax		-34.1315	-60.6625	Argentina	Positive	3	500	44	40	10786	7	32
SRR15173572	17557890	5267367000	300	POR14_GCCAAT_L007	WGS	size fractionation	GENOMIC	PAIRED	ILLUMINA	Illumina HiSeq 2500	PRJNA311274	SAMN20257338	POR14	POR14	Hive	2014	France: Porquerolles	thorax	NA	NA	male	NA	NA	NA	NA	male	thorax		NA	NA	France	Positive	10	341	0	70	8014	174	0
SRR15173914	13341604	4002481200	300	POL12_AGTCAA_L005	WGS	size fractionation	GENOMIC	PAIRED	ILLUMINA	Illumina HiSeq 2500	PRJNA311274	SAMN20257315	POL12	POL12	Hive	2014	Poland	thorax	NA	NA	male	NA	NA	NA	NA	male	thorax		NA	NA	Poland	Positive	37	145	5	61	4757	175	0
SRR11471517	6013455	1804036500	300	AR1407	WGS	RANDOM	GENOMIC	PAIRED	ILLUMINA	Illumina HiSeq 4000	PRJNA622776	SAMN14526612	AR1407	NA	foraging on vegetation	1/16/2018	Argentina	wing muscle	adult	32.2789 S 60.9828 W	female	NA	NA	NA	adult	female	thorax		-32.2789	-60.9828	Argentina	Positive	2	457	49	44	10864	6	26
SRR11471634	6029054	1808716200	300	CA0904	WGS	RANDOM	GENOMIC	PAIRED	ILLUMINA	Illumina HiSeq 4000	PRJNA622776	SAMN14526757	CA0904	NA	foraging on vegetation	6/25/2018	USA: California	wing muscle	adult	34.9078 N 120.4536 W	female	NA	NA	NA	adult	female	thorax		34.9078	-120.454	USA	Positive	7	394	64	95	11069	48	0
SRR15173570	43457625	13037287500	300	POR3_GTGGCC_merged	WGS	size fractionation	GENOMIC	PAIRED	ILLUMINA	Illumina HiSeq 2500	PRJNA311274	SAMN20257340	POR3	POR3	Hive	2014	France: Porquerolles	thorax	NA	NA	male	NA	NA	NA	NA	male	thorax		NA	NA	France	Positive	6	362	0	62	8662	153	0
ERR5665178	12450638	3112929247	250	unspecified	WGS	other	GENOMIC	PAIRED	ILLUMINA	Illumina HiSeq 3000	PRJEB34590	SAMEA7109106	SAMEA7109106	NA	NA	1948	Switzerland	NA	NA	NA	worker	NA	NA	NA	NA	female	NA		NA	NA	Switzerland	Positive	8	172	2	238	8514	0	0
SRR11471403	7045888	2113766400	300	CA0225	WGS	RANDOM	GENOMIC	PAIRED	ILLUMINA	Illumina HiSeq 4000	PRJNA622776	SAMN14526715	CA0225	NA	foraging on vegetation	8/4/2018	USA: California	wing muscle	adult	33.1819 N 116.9719 W	female	NA	NA	NA	adult	female	thorax		33.1819	-116.972	USA	Positive	2	415	61	56	11256	23	24
SRR11471612	5542356	1662706800	300	CA1218	WGS	RANDOM	GENOMIC	PAIRED	ILLUMINA	Illumina HiSeq 4000	PRJNA622776	SAMN14526777	CA1218	NA	foraging on vegetation	6/24/2018	USA: California	wing muscle	adult	35.7808 N 120.8867 W	female	NA	NA	NA	adult	female	thorax		35.7808	-120.887	USA	Positive	7	390	56	50	10696	43	0
SRR11038166	32596469	9844133638	302	Sample 23	WGS	RANDOM PCR	GENOMIC	PAIRED	ILLUMINA	Illumina HiSeq 4000	PRJNA605407	SAMN14056741	Italian1_11	Honey Bee	Colony	2018-03	USA:Louisiana	Whole body	NA	NA	female	NA	NA	NA	NA	female	whole body		NA	NA	USA	Positive	55	313	2	93	10425	113	9
SRR11471595	8551220	2565366000	300	CA1313	WGS	RANDOM	GENOMIC	PAIRED	ILLUMINA	Illumina HiSeq 4000	PRJNA622776	SAMN14526791	CA1313	NA	foraging on vegetation	6/26/2018	USA: California	wing muscle	adult	36.2656 N 120.9953 W	female	NA	NA	NA	adult	female	thorax		36.2656	-120.995	USA	Positive	5	370	42	62	10943	30	5
SRR12726895	48667115	12166778750	250	POOL_15_GCCAAT_L003_	WGS	RANDOM	GENOMIC	PAIRED	ILLUMINA	Illumina HiSeq 2500	PRJNA666033	SAMN16277087	POOL_15	NA	hive	2015	Switzerland	head	NA	NA	female	NA	NA	NA	NA	female	head		NA	NA	Switzerland	Positive	10	295	0	34	8106	110	0
SRR6236943	15851968	4755590400	300	CAU21_CAGATC_L001	WGS	size fractionation	GENOMIC	PAIRED	ILLUMINA	Illumina HiSeq 2500	PRJNA311274	SAMN07956269	CAU21	CAU21	Hive	2014	France	Thorax	Puape/Larvae	NA	male	NA	NA	NA	larval/pupal	male	thorax		NA	NA	France	Positive	2	242	0	67	7579	228	0
SRR11471618	8196335	2458900500	300	CA1109	WGS	RANDOM	GENOMIC	PAIRED	ILLUMINA	Illumina HiSeq 4000	PRJNA622776	SAMN14526772	CA1109	NA	foraging on vegetation	6/24/2018	USA: California	wing muscle	adult	35.5083 N 120.6942 W	female	NA	NA	NA	adult	female	thorax		35.5083	-120.694	USA	Positive	12	329	28	64	10764	16	0
SRR11038177	26495870	8001752740	302	Sample 13	WGS	RANDOM PCR	GENOMIC	PAIRED	ILLUMINA	Illumina HiSeq 4000	PRJNA605407	SAMN14056731	Italian1_1	Honey Bee	Colony	2018-03	USA:Louisiana	Whole body	NA	NA	female	NA	NA	NA	NA	female	whole body		NA	NA	USA	Positive	24	356	0	51	10741	96	11
SRR11038174	26974434	8146279068	302	Sample 16	WGS	RANDOM PCR	GENOMIC	PAIRED	ILLUMINA	Illumina HiSeq 4000	PRJNA605407	SAMN14056734	Italian1_4	Honey Bee	Colony	2018-03	USA:Louisiana	Whole body	NA	NA	female	NA	NA	NA	NA	female	whole body		NA	NA	USA	Positive	32	343	2	44	10731	86	11
SRR11471573	5579268	1673780400	300	AR0813	WGS	RANDOM	GENOMIC	PAIRED	ILLUMINA	Illumina HiSeq 4000	PRJNA622776	SAMN14526561	AR0813	NA	foraging on vegetation	1/22/2018	Argentina	wing muscle	adult	34.5639 S 60.8842 W	female	NA	NA	NA	adult	female	thorax		-34.5639	-60.8842	Argentina	Positive	2	369	33	41	11888	42	0
ERR1700845	10733908	2683477000	250	WGS	WGS	unspecified	GENOMIC	PAIRED	ILLUMINA	Illumina HiSeq 2500	PRJEB16533	SAMEA4521151	SAMEA4521151	NA	NA	Spring/Summer 2014	Switzerland	NA	pupae or larvae	NA	male	NA	NA	NA	larval/pupal	male	NA		NA	NA	Switzerland	Positive	58	2	6	215	7873	35	0
SRR11038103	29448826	8893545452	302	Sample 37	WGS	RANDOM PCR	GENOMIC	PAIRED	ILLUMINA	Illumina HiSeq 4000	PRJNA605407	SAMN14056755	MNHyg1	Honey Bee	Colony	2018-03	USA:Louisiana	Whole body	NA	NA	female	NA	NA	NA	NA	female	whole body		NA	NA	USA	Positive	22	272	2	51	10491	108	11
SRR10714367	57556757	11276714804	195	Sample_S73	WGS	RANDOM	GENOMIC	PAIRED	ILLUMINA	Illumina HiSeq 2500	PRJNA596071	SAMN13611968	S73	NA	drone	7/31/2014	Austria: Salvator	flight muscle	NA	NA	male	NA	NA	NA	NA	male	thorax		NA	NA	Austria	Positive	2	2	0	61	5338	0	0
SRR14654189	69633140	20750675720	298	G3_S1	WGS	unspecified	GENOMIC	PAIRED	ILLUMINA	NextSeq 550	PRJNA732718	SAMN19338889	G3 Drone	EHB G3 Drone	Langstroth hive	2020-10	USA: Texas	Abdomen	NA	NA	NA	NA	NA	NA	NA	NA	abdomen		NA	NA	USA	Positive	10	312	151	135	8377	606	0
SRR11471495	6409667	1922900100	300	AR1905	WGS	RANDOM	GENOMIC	PAIRED	ILLUMINA	Illumina HiSeq 4000	PRJNA622776	SAMN14526635	AR1905	NA	foraging on vegetation	1/18/2018	Argentina	wing muscle	adult	31.2003 S 60.1592 W	female	NA	NA	NA	adult	female	thorax		-31.2003	-60.1592	Argentina	Positive	4	474	119	102	9980	28	4
SRR10305326	9067655	2738431810	302	UDHB002	WGS	unspecified	GENOMIC	PAIRED	ILLUMINA	Illumina HiSeq 2500	PRJNA578233	SAMN13053289	Urals Dark Honey Bee 2	Chishminsky district, Rafael Valeev's apiary	Hive	7/25/2019	Russia:Bashkortostan	Thorax	Adult	54.6710583 N 55.1600917 E	male	1	NA	NA	adult	male	thorax		54.6711	55.1601	Russia	Positive	12	483	0	52	8981	150	0
SRR11038154	29790999	8996881698	302	Sample 48	WGS	RANDOM PCR	GENOMIC	PAIRED	ILLUMINA	Illumina HiSeq 4000	PRJNA605407	SAMN14056766	MNHyg12	Honey Bee	Colony	2018-03	USA:Louisiana	Whole body	NA	NA	female	NA	NA	NA	NA	female	whole body		NA	NA	USA	Positive	73	425	2	60	9836	181	0
SRR11471388	5989405	1796821500	300	CA0411	WGS	RANDOM	GENOMIC	PAIRED	ILLUMINA	Illumina HiSeq 4000	PRJNA622776	SAMN14526728	CA0411	NA	foraging on vegetation	6/18/2018	USA: California	wing muscle	adult	33.8181 N 117.4239 W	female	NA	NA	NA	adult	female	thorax		33.8181	-117.424	USA	Positive	5	499	45	55	11120	14	27
SRR11038156	32581990	9839760980	302	Sample 46	WGS	RANDOM PCR	GENOMIC	PAIRED	ILLUMINA	Illumina HiSeq 4000	PRJNA605407	SAMN14056764	MNHyg10	Honey Bee	Colony	2018-03	USA:Louisiana	Whole body	NA	NA	female	NA	NA	NA	NA	female	whole body		NA	NA	USA	Positive	18	332	3	37	9677	108	12
SRR11038147	27941121	8438218542	302	Sample 69	WGS	RANDOM PCR	GENOMIC	PAIRED	ILLUMINA	Illumina HiSeq 4000	PRJNA605407	SAMN14056787	Russian9	Honey Bee	Colony	2018-03	USA:Louisiana	Whole body	NA	NA	female	NA	NA	NA	NA	female	whole body		NA	NA	USA	Positive	206	546	13	349	8386	95	2
SRR11038108	29031744	8767586688	302	Sample 32	WGS	RANDOM PCR	GENOMIC	PAIRED	ILLUMINA	Illumina HiSeq 4000	PRJNA605407	SAMN14056750	Italian2_8	Honey Bee	Colony	2018-03	USA:Louisiana	Whole body	NA	NA	female	NA	NA	NA	NA	female	whole body		NA	NA	USA	Positive	193	544	14	382	8338	90	0
SRR11038175	27170350	8205445700	302	Sample 15	WGS	RANDOM PCR	GENOMIC	PAIRED	ILLUMINA	Illumina HiSeq 4000	PRJNA605407	SAMN14056733	Italian1_3	Honey Bee	Colony	2018-03	USA:Louisiana	Whole body	NA	NA	female	NA	NA	NA	NA	female	whole body		NA	NA	USA	Positive	108	356	4	117	10930	98	10
SRR6281806	10385658	3115697400	300	xj4	WGS	RANDOM	GENOMIC	PAIRED	ILLUMINA	HiSeq X Ten	PRJNA418015	SAMN08013132	XJHF-4	worker bee	not applicable	2016-04	China: Xinjiang, replicate 4	whole body	NA	NA	female	NA	NA	NA	NA	female	whole body		NA	NA	China	Positive	138	283	7	291	9826	105	0
SRR11038099	30748162	9285944924	302	Sample 83	WGS	RANDOM PCR	GENOMIC	PAIRED	ILLUMINA	Illumina HiSeq 4000	PRJNA605407	SAMN14056801	Italian3_11	Honey Bee	Colony	2018-03	USA:Louisiana	Whole body	NA	NA	female	NA	NA	NA	NA	female	whole body		NA	NA	USA	Positive	79	370	2	123	9572	118	0
SRR11038100	26626212	8041116024	302	Sample 82	WGS	RANDOM PCR	GENOMIC	PAIRED	ILLUMINA	Illumina HiSeq 4000	PRJNA605407	SAMN14056800	Italian3_10	Honey Bee	Colony	2018-03	USA:Louisiana	Whole body	NA	NA	female	NA	NA	NA	NA	female	whole body		NA	NA	USA	Positive	77	366	12	193	9857	138	2
SRR12726886	56095589	14023897250	250	POOL_9_GTGAAA_L005_	WGS	RANDOM	GENOMIC	PAIRED	ILLUMINA	Illumina HiSeq 2500	PRJNA666033	SAMN16277081	POOL_9	NA	hive	2015	Italy	head	NA	NA	female	NA	NA	NA	NA	female	head		NA	NA	Italy	Positive	87	226	3	153	6699	123	0
SRR6281802	21825054	6547516200	300	xj5	WGS	RANDOM	GENOMIC	PAIRED	ILLUMINA	HiSeq X Ten	PRJNA418015	SAMN08013133	XJHF-5	worker bee	not applicable	2016-04	China: Xinjiang, replicate 5	whole body	NA	NA	female	NA	NA	NA	NA	female	whole body		NA	NA	China	Positive	67	300	10	64	9236	121	0
SRR11038112	32933327	9945864754	302	Sample 29	WGS	RANDOM PCR	GENOMIC	PAIRED	ILLUMINA	Illumina HiSeq 4000	PRJNA605407	SAMN14056747	Italian2_5	Honey Bee	Colony	2018-03	USA:Louisiana	Whole body	NA	NA	female	NA	NA	NA	NA	female	whole body		NA	NA	USA	Positive	79	517	6	147	9644	164	0
SRR11038155	28546020	8620898040	302	Sample 47	WGS	RANDOM PCR	GENOMIC	PAIRED	ILLUMINA	Illumina HiSeq 4000	PRJNA605407	SAMN14056765	MNHyg11	Honey Bee	Colony	2018-03	USA:Louisiana	Whole body	NA	NA	female	NA	NA	NA	NA	female	whole body		NA	NA	USA	Positive	70	330	6	92	9171	110	19
SRR11038121	37544341	11338390982	302	Sample 63	WGS	RANDOM PCR	GENOMIC	PAIRED	ILLUMINA	Illumina HiSeq 4000	PRJNA605407	SAMN14056781	Russian3	Honey Bee	Colony	2018-03	USA:Louisiana	Whole body	NA	NA	female	NA	NA	NA	NA	female	whole body		NA	NA	USA	Positive	62	479	5	127	8840	69	26
SRR5580809	13207516	1320751600	100	ap54_rep1	WGS	RANDOM	GENOMIC	SINGLE	ILLUMINA	Illumina HiSeq 2000	PRJNA385500	SAMN06921481	ap54	worker bee	Nature Reserve	1996	USA:CA, Solano Co. Stebbins Cold Cyn. Reserve 38 30'N 122 08'W 11 km W. Winters, replicate 4	whole body	NA	NA	female	adult	NA	NA	adult	female	whole body		NA	NA	USA	Positive	53	121	2	65	3624	25	0
SRR11038142	37169993	11225337886	302	Sample 73	WGS	RANDOM PCR	GENOMIC	PAIRED	ILLUMINA	Illumina HiSeq 4000	PRJNA605407	SAMN14056791	Italian3_1	Honey Bee	Colony	2018-03	USA:Louisiana	Whole body	NA	NA	female	NA	NA	NA	NA	female	whole body		NA	NA	USA	Positive	37	383	3	71	10089	85	21
SRR11038176	28114817	8490674734	302	Sample 14	WGS	RANDOM PCR	GENOMIC	PAIRED	ILLUMINA	Illumina HiSeq 4000	PRJNA605407	SAMN14056732	Italian1_2	Honey Bee	Colony	2018-03	USA:Louisiana	Whole body	NA	NA	female	NA	NA	NA	NA	female	whole body		NA	NA	USA	Positive	31	304	5	35	10631	76	17
SRR11038138	26781646	8088057092	302	Sample 77	WGS	RANDOM PCR	GENOMIC	PAIRED	ILLUMINA	Illumina HiSeq 4000	PRJNA605407	SAMN14056795	Italian3_5	Honey Bee	Colony	2018-03	USA:Louisiana	Whole body	NA	NA	female	NA	NA	NA	NA	female	whole body		NA	NA	USA	Positive	24	400	2	37	10116	138	2
SRR11038135	26785090	8089097180	302	Sample 80	WGS	RANDOM PCR	GENOMIC	PAIRED	ILLUMINA	Illumina HiSeq 4000	PRJNA605407	SAMN14056798	Italian3_8	Honey Bee	Colony	2018-03	USA:Louisiana	Whole body	NA	NA	female	NA	NA	NA	NA	female	whole body		NA	NA	USA	Positive	19	349	2	38	9884	112	2
SRR12726880	101595030	25398757500	250	POOL_12_CTTGTA_L008_	WGS	RANDOM	GENOMIC	PAIRED	ILLUMINA	Illumina HiSeq 2500	PRJNA666033	SAMN16277084	POOL_12	NA	hive	2015	Cyprus	head	NA	NA	female	NA	NA	NA	NA	female	head		NA	NA	Cyprus	Positive	17	188	137	338	6560	86	2
SRR12726881	49615260	12403815000	250	POOL_13_ACAGTG_L007_	WGS	RANDOM	GENOMIC	PAIRED	ILLUMINA	Illumina HiSeq 2500	PRJNA666033	SAMN16277085	POOL_13	NA	hive	2015	Austria: Hungary	head	NA	NA	female	NA	NA	NA	NA	female	head		NA	NA	Austria	Positive	17	211	151	420	7036	93	0
SRR11038171	26978094	8147384388	302	Sample 19	WGS	RANDOM PCR	GENOMIC	PAIRED	ILLUMINA	Illumina HiSeq 4000	PRJNA605407	SAMN14056737	Italian1_7	Honey Bee	Colony	2018-03	USA:Louisiana	Whole body	NA	NA	female	NA	NA	NA	NA	female	whole body		NA	NA	USA	Positive	16	385	23	58	9638	86	11
SRR12726918	101717129	25429282250	250	Pool7_ACTGAT_L006_	WGS	RANDOM	GENOMIC	PAIRED	ILLUMINA	Illumina HiSeq 2500	PRJNA666033	SAMN16277079	POOL_7	NA	hive	2015	Greece	head	NA	NA	female	NA	NA	NA	NA	female	head		NA	NA	Greece	Positive	14	336	5	92	7569	97	0
SRR5580820	18328115	1392936740	76	ap22_rep1	WGS	RANDOM	GENOMIC	SINGLE	ILLUMINA	Illumina HiSeq 2000	PRJNA385500	SAMN06921432	ap22	worker bee	Blue Lake	1966	USA:CA, Humboldt Co., Blue lake, replicate 2	whole body	NA	NA	female	adult	NA	NA	adult	female	whole body		NA	NA	USA	Positive	13	206	2	57	2547	24	0
SRR12726910	72328840	18082210000	250	POOL_19_TGACCA_L007_	WGS	RANDOM	GENOMIC	PAIRED	ILLUMINA	Illumina HiSeq 2500	PRJNA666033	SAMN16277091	POOL_19	NA	hive	2015	Isle of Man	head	NA	NA	female	NA	NA	NA	NA	female	head		NA	NA	Great Britain	Positive	12	353	2	55	8063	103	0
SRR5580796	42555259	4255525900	100	ap36_rep2	WGS	RANDOM	GENOMIC	SINGLE	ILLUMINA	Illumina HiSeq 2000	PRJNA385500	SAMN06921456	SRCD3D	worker bee	Coastal Sage	2002	USA:CA, LA Co. San Pedro, replicate 4	whole body	NA	NA	female	adult	NA	NA	adult	female	whole body		NA	NA	USA	Positive	10	157	81	133	3159	2	6
SRR11471528	7039847	2111954100	300	AR1306	WGS	RANDOM	GENOMIC	PAIRED	ILLUMINA	Illumina HiSeq 4000	PRJNA622776	SAMN14526602	AR1306	NA	foraging on vegetation	1/16/2018	Argentina	wing muscle	adult	32.7072 S 60.7792 W	female	NA	NA	NA	adult	female	thorax		-32.7072	-60.7792	Argentina	Positive	8	356	146	137	10463	8	8
SRR2163120	47838421	9567684200	200	Scout_1	WGS	RANDOM	GENOMIC	PAIRED	ILLUMINA	Illumina HiSeq 2000	PRJNA292680	SAMN03983474	Scout_1	S1	NA	2011	USA: University of Illinois Bee Research Facility, Urbana, IL	whole body	forager	NA	female	adult	NA	NA	adult	female	whole body		NA	NA	USA	Positive	6	180	15	35	4363	11	0
SRR11471540	5018501	1505550300	300	AR1218	WGS	RANDOM	GENOMIC	PAIRED	ILLUMINA	Illumina HiSeq 4000	PRJNA622776	SAMN14526591	AR1218	NA	foraging on vegetation	1/21/2018	Argentina	wing muscle	adult	32.9719 S 60.7194 W	female	NA	NA	NA	adult	female	thorax		-32.9719	-60.7194	Argentina	Positive	6	467	57	40	10810	22	12
SRR11471646	5036090	1510827000	300	CA0822	WGS	RANDOM	GENOMIC	PAIRED	ILLUMINA	Illumina HiSeq 4000	PRJNA622776	SAMN14526746	CA0822	NA	foraging on vegetation	8/3/2018	USA: California	wing muscle	adult	34.4331 N 118.6592 W	female	NA	NA	NA	adult	female	thorax		34.4331	-118.659	USA	Positive	5	374	89	111	10472	29	0
SRR14703824	63700007	19237402114	302	Alamark1	WGS	RANDOM	GENOMIC	PAIRED	ILLUMINA	HiSeq X Five	PRJNA729035	SAMN19109619	Alamark1	Apis_mellifera_Alamark1	Not Applicable	2010	Kenya: Gede Ruins	1/2 Thorax	Adult	3.306498 S 40.017988 E	female	NA	NA	NA	adult	female	thorax		-3.3065	40.018	Kenya	Positive	5	425	97	99	7318	46	166
SRR11471432	8867571	2660271300	300	AR2703	WGS	RANDOM	GENOMIC	PAIRED	ILLUMINA	Illumina HiSeq 4000	PRJNA622776	SAMN14526689	AR2703	NA	foraging on vegetation	1/19/2018	Argentina	wing muscle	adult	28.6078 S 59.3989 W	female	NA	NA	NA	adult	female	thorax		-28.6078	-59.3989	Argentina	Positive	5	521	120	122	10480	3	41
SRR11471550	13215122	3964536600	300	AR1006	WGS	RANDOM	GENOMIC	PAIRED	ILLUMINA	Illumina HiSeq 4000	PRJNA622776	SAMN14526582	AR1006	NA	foraging on vegetation	1/22/2018	Argentina	wing muscle	adult	33.5919 S 60.3544 W	female	NA	NA	NA	adult	female	thorax		-33.5919	-60.3544	Argentina	Positive	5	422	536	449	10799	16	0
SRR11471610	5752989	1725896700	300	CA1213	WGS	RANDOM	GENOMIC	PAIRED	ILLUMINA	Illumina HiSeq 4000	PRJNA622776	SAMN14526779	CA1213	NA	foraging on vegetation	6/24/2018	USA: California	wing muscle	adult	35.8364 N 120.8444 W	female	NA	NA	NA	adult	female	thorax		35.8364	-120.844	USA	Positive	5	352	30	54	11494	43	0
SRR11471504	5558428	1667528400	300	AR1601	WGS	RANDOM	GENOMIC	PAIRED	ILLUMINA	Illumina HiSeq 4000	PRJNA622776	SAMN14526627	AR1601	NA	foraging on vegetation	1/17/2018	Argentina	wing muscle	adult	31.6806 S 60.7736 W	female	NA	NA	NA	adult	female	thorax		-31.6806	-60.7736	Argentina	Positive	5	527	160	127	10268	15	17
SRR11471532	6511948	1953584400	300	AR1215	WGS	RANDOM	GENOMIC	PAIRED	ILLUMINA	Illumina HiSeq 4000	PRJNA622776	SAMN14526598	AR1215	NA	foraging on vegetation	1/16/2018	Argentina	wing muscle	adult	32.8853 S 60.695 W	female	NA	NA	NA	adult	female	thorax		-32.8853	-60.695	Argentina	Positive	5	557	90	102	10189	25	4
SRR11471442	5882692	1764807600	300	AR2613	WGS	RANDOM	GENOMIC	PAIRED	ILLUMINA	Illumina HiSeq 4000	PRJNA622776	SAMN14526680	AR2613	NA	foraging on vegetation	1/19/2018	Argentina	wing muscle	adult	29.1133 S 59.6361 W	female	NA	NA	NA	adult	female	thorax		-29.1133	-59.6361	Argentina	Positive	5	390	110	120	10073	15	0
SRR11471560	7411917	2223575100	300	AR0111	WGS	RANDOM	GENOMIC	PAIRED	ILLUMINA	Illumina HiSeq 4000	PRJNA622776	SAMN14526528	AR0111	NA	foraging on vegetation	1/24/2018	Argentina	wing muscle	adult	36.2244 S 61.1233 W	female	NA	NA	NA	adult	female	thorax		-36.2244	-61.1233	Argentina	Positive	5	531	57	51	10800	20	10
SRR11471411	6301349	1890404700	300	CA0128	WGS	RANDOM	GENOMIC	PAIRED	ILLUMINA	Illumina HiSeq 4000	PRJNA622776	SAMN14526708	CA0128	NA	foraging on vegetation	8/4/2018	USA: California	wing muscle	adult	32.8222 N 116.8319 W	female	NA	NA	NA	adult	female	thorax		32.8222	-116.832	USA	Positive	5	402	33	46	11216	10	8
SRR12726894	49035844	12258961000	250	POOL_15_GCCAAT_L002_	WGS	RANDOM	GENOMIC	PAIRED	ILLUMINA	Illumina HiSeq 2500	PRJNA666033	SAMN16277087	POOL_15	NA	hive	2015	Switzerland	head	NA	NA	female	NA	NA	NA	NA	female	head		NA	NA	Switzerland	Positive	5	304	0	32	8066	105	0
SRR12726875	72148679	18037169750	250	POOL_19_TGACCA_L006_	WGS	RANDOM	GENOMIC	PAIRED	ILLUMINA	Illumina HiSeq 2500	PRJNA666033	SAMN16277091	POOL_19	NA	hive	2015	Isle of Man	head	NA	NA	female	NA	NA	NA	NA	female	head		NA	NA	Great Britain	Positive	4	398	2	36	8192	105	0
SRR5580828	53390155	5339015500	100	SRCD8A	WGS	RANDOM	GENOMIC	SINGLE	ILLUMINA	Illumina HiSeq 2000	PRJNA385500	SAMN06921487	SRCD8A	worker bee	Stanislaus County	2014	USA:CA, Stanislaus County, replicate 1	whole body	NA	NA	female	adult	NA	NA	adult	female	whole body		NA	NA	USA	Positive	4	184	30	59	5258	14	0
SRR11471632	9739706	2921911800	300	CA1010	WGS	RANDOM	GENOMIC	PAIRED	ILLUMINA	Illumina HiSeq 4000	PRJNA622776	SAMN14526759	CA1010	NA	foraging on vegetation	6/25/2018	USA: California	wing muscle	adult	35.1222 N 120.5572 W	female	NA	NA	NA	adult	female	thorax		35.1222	-120.557	USA	Positive	3	306	125	115	10599	23	17
SRR11471454	5895967	1768790100	300	AR2511	WGS	RANDOM	GENOMIC	PAIRED	ILLUMINA	Illumina HiSeq 4000	PRJNA622776	SAMN14526669	AR2511	NA	foraging on vegetation	1/19/2018	Argentina	wing muscle	adult	29.5128 S 59.7414 W	female	NA	NA	NA	adult	female	thorax		-29.5128	-59.7414	Argentina	Positive	3	518	38	47	10991	3	18
SRR11471446	9848705	2954611500	300	AR2601	WGS	RANDOM	GENOMIC	PAIRED	ILLUMINA	Illumina HiSeq 4000	PRJNA622776	SAMN14526676	AR2601	NA	foraging on vegetation	1/19/2018	Argentina	wing muscle	adult	29.1456 S 59.6558 W	female	NA	NA	NA	adult	female	thorax		-29.1456	-59.6558	Argentina	Positive	3	417	537	503	9992	12	10
SRR11471581	7181146	2154343800	300	AR0605	WGS	RANDOM	GENOMIC	PAIRED	ILLUMINA	Illumina HiSeq 4000	PRJNA622776	SAMN14526553	AR0605	NA	foraging on vegetation	1/23/2018	Argentina	wing muscle	adult	34.9178 S 61.0147 W	female	NA	NA	NA	adult	female	thorax		-34.9178	-61.0147	Argentina	Positive	3	383	109	123	10774	32	12
SRR11471398	5130788	1539236400	300	CA0306	WGS	RANDOM	GENOMIC	PAIRED	ILLUMINA	Illumina HiSeq 4000	PRJNA622776	SAMN14526720	CA0306	NA	foraging on vegetation	6/17/2018	USA: California	wing muscle	adult	33.47 N 117.0947 W	female	NA	NA	NA	adult	female	thorax		33.47	-117.095	USA	Positive	2	418	126	116	10568	15	19
SRR11471577	11706119	3511835700	300	AR0818	WGS	RANDOM	GENOMIC	PAIRED	ILLUMINA	Illumina HiSeq 4000	PRJNA622776	SAMN14526557	AR0818	NA	foraging on vegetation	1/22/2018	Argentina	wing muscle	adult	34.5761 S 60.9114 W	female	NA	NA	NA	adult	female	thorax		-34.5761	-60.9114	Argentina	Positive	2	405	122	105	10566	32	0
SRR11471526	5743141	1722942300	300	AR1305	WGS	RANDOM	GENOMIC	PAIRED	ILLUMINA	Illumina HiSeq 4000	PRJNA622776	SAMN14526603	AR1305	NA	foraging on vegetation	1/16/2018	Argentina	wing muscle	adult	32.7017 S 60.7681 W	female	NA	NA	NA	adult	female	thorax		-32.7017	-60.7681	Argentina	Positive	2	480	57	59	10878	9	9
SRR14703858	52040049	15716094798	302	Ayem_SN2	WGS	RANDOM	GENOMIC	PAIRED	ILLUMINA	HiSeq X Five	PRJNA729035	SAMN19109687	Ayem_SN2	Apis_mellifera_Ayem_SN2	Not Applicable	Not Collected	Yemen: Sanaa	Full Thorax	Adult	NA	female	NA	NA	NA	adult	female	thorax		NA	NA	Yemen	Positive	2	362	4	29	7249	378	0
SRR11471434	5929076	1778722800	300	AR2716	WGS	RANDOM	GENOMIC	PAIRED	ILLUMINA	Illumina HiSeq 4000	PRJNA622776	SAMN14526687	AR2716	NA	foraging on vegetation	1/20/2018	Argentina	wing muscle	adult	28.7267 S 59.4778 W	female	NA	NA	NA	adult	female	thorax		-28.7267	-59.4778	Argentina	Positive	2	375	45	54	10369	2	21
SRR11471481	10596503	3178950900	300	AR2007	WGS	RANDOM	GENOMIC	PAIRED	ILLUMINA	Illumina HiSeq 4000	PRJNA622776	SAMN14526644	AR2007	NA	foraging on vegetation	1/18/2018	Argentina	wing muscle	adult	30.7447 S 59.9958 W	female	NA	NA	NA	adult	female	thorax		-30.7447	-59.9958	Argentina	Positive	2	321	129	147	10439	29	17
SRR11471493	6727884	2018365200	300	AR1503	WGS	RANDOM	GENOMIC	PAIRED	ILLUMINA	Illumina HiSeq 4000	PRJNA622776	SAMN14526619	AR1503	NA	foraging on vegetation	1/17/2018	Argentina	wing muscle	adult	31.9825 S 60.9167 W	female	NA	NA	NA	adult	female	thorax		-31.9825	-60.9167	Argentina	Positive	2	367	124	101	9886	21	0
SRR11471583	6238784	1871635200	300	AR0606	WGS	RANDOM	GENOMIC	PAIRED	ILLUMINA	Illumina HiSeq 4000	PRJNA622776	SAMN14526552	AR0606	NA	foraging on vegetation	1/23/2018	Argentina	wing muscle	adult	34.9942 S 61.0117 W	female	NA	NA	NA	adult	female	thorax		-34.9942	-61.0117	Argentina	Positive	2	375	37	51	8723	30	0
SRR11471574	7939572	2381871600	300	AR0811	WGS	RANDOM	GENOMIC	PAIRED	ILLUMINA	Illumina HiSeq 4000	PRJNA622776	SAMN14526560	AR0811	NA	foraging on vegetation	1/22/2018	Argentina	wing muscle	adult	34.5686 S 60.905 W	female	NA	NA	NA	adult	female	thorax		-34.5686	-60.905	Argentina	Positive	2	420	133	117	10520	30	0
SRR11471400	9674474	2902342200	300	CA0330	WGS	RANDOM	GENOMIC	PAIRED	ILLUMINA	Illumina HiSeq 4000	PRJNA622776	SAMN14526718	CA0330	NA	foraging on vegetation	8/4/2018	USA: California	wing muscle	adult	33.4464 N 117.2503 W	female	NA	NA	NA	adult	female	thorax		33.4464	-117.25	USA	Positive	2	422	196	140	10525	22	16
SRR14703873	63852352	19283410304	302	Auni_mad15	WGS	RANDOM	GENOMIC	PAIRED	ILLUMINA	HiSeq X Five	PRJNA729035	SAMN19109638	Auni_mad15	Apis_mellifera_Auni_mad15	Not Applicable	2009	Madagascar	1/2 head	Adult	NA	female	NA	NA	NA	adult	female	head		NA	NA	Madagascar	Positive	2	475	30	66	7975	11	2
SRR11471655	5857834	1757350200	300	CA0522	WGS	RANDOM	GENOMIC	PAIRED	ILLUMINA	Illumina HiSeq 4000	PRJNA622776	SAMN14526738	CA0522	NA	foraging on vegetation	8/5/2018	USA: California	wing muscle	adult	34.1267 N 117.8633 W	female	NA	NA	NA	adult	female	thorax		34.1267	-117.863	USA	Positive	2	477	54	50	11114	31	12
SRR11471551	11916084	3574825200	300	AR1005	WGS	RANDOM	GENOMIC	PAIRED	ILLUMINA	Illumina HiSeq 4000	PRJNA622776	SAMN14526581	AR1005	NA	foraging on vegetation	1/22/2018	Argentina	wing muscle	adult	33.5989 S 60.3583 W	female	NA	NA	NA	adult	female	thorax		-33.5989	-60.3583	Argentina	Positive	2	576	129	154	10511	58	0
SRR11471425	10413879	3124163700	300	AR2915	WGS	RANDOM	GENOMIC	PAIRED	ILLUMINA	Illumina HiSeq 4000	PRJNA622776	SAMN14526695	AR2915	NA	foraging on vegetation	1/20/2018	Argentina	wing muscle	adult	28.3533 S 59.2614 W	female	NA	NA	NA	adult	female	thorax		-28.3533	-59.2614	Argentina	Positive	2	453	173	147	10037	9	13
SRR11471505	6128795	1838638500	300	AR1605	WGS	RANDOM	GENOMIC	PAIRED	ILLUMINA	Illumina HiSeq 4000	PRJNA622776	SAMN14526626	AR1605	NA	foraging on vegetation	1/17/2018	Argentina	wing muscle	adult	31.6836 S 60.7772 W	female	NA	NA	NA	adult	female	thorax		-31.6836	-60.7772	Argentina	Positive	2	446	126	132	10530	4	19
SRR11471518	8040712	2412213600	300	AR1406	WGS	RANDOM	GENOMIC	PAIRED	ILLUMINA	Illumina HiSeq 4000	PRJNA622776	SAMN14526611	AR1406	NA	foraging on vegetation	1/16/2018	Argentina	wing muscle	adult	32.2944 S 60.9647 W	female	NA	NA	NA	adult	female	thorax		-32.2944	-60.9647	Argentina	Positive	2	450	122	98	10612	15	8
SRR11471509	6162553	1848765900	300	AR0312	WGS	RANDOM	GENOMIC	PAIRED	ILLUMINA	Illumina HiSeq 4000	PRJNA622776	SAMN14526533	AR0312	NA	foraging on vegetation	1/23/2018	Argentina	wing muscle	adult	35.8114 S 60.8972 W	female	NA	NA	NA	adult	female	thorax		-35.8114	-60.8972	Argentina	Positive	2	391	126	132	10382	19	9
SRR11471549	7252409	2175722700	300	AR0105	WGS	RANDOM	GENOMIC	PAIRED	ILLUMINA	Illumina HiSeq 4000	PRJNA622776	SAMN14526529	AR0105	NA	foraging on vegetation	1/23/2018	Argentina	wing muscle	adult	36.1983 S 61.1361 W	female	NA	NA	NA	adult	female	thorax		-36.1983	-61.1361	Argentina	Positive	2	395	144	115	10594	29	0
SRR11471602	9718704	2915611200	300	CA1302	WGS	RANDOM	GENOMIC	PAIRED	ILLUMINA	Illumina HiSeq 4000	PRJNA622776	SAMN14526784	CA1302	NA	foraging on vegetation	6/26/2018	USA: California	wing muscle	adult	36.1444 N 121.0075 W	female	NA	NA	NA	adult	female	thorax		36.1444	-121.007	USA	Positive	2	396	143	88	10546	38	0
SRR11471483	6061422	1818426600	300	AR0309	WGS	RANDOM	GENOMIC	PAIRED	ILLUMINA	Illumina HiSeq 4000	PRJNA622776	SAMN14526535	AR0309	NA	foraging on vegetation	1/23/2018	Argentina	wing muscle	adult	35.7811 S 60.9194 W	female	NA	NA	NA	adult	female	thorax		-35.7811	-60.9194	Argentina	Positive	2	525	61	47	11024	24	0
SRR11471405	5549103	1664730900	300	CA0217	WGS	RANDOM	GENOMIC	PAIRED	ILLUMINA	Illumina HiSeq 4000	PRJNA622776	SAMN14526713	CA0217	NA	foraging on vegetation	6/17/2018	USA: California	wing muscle	adult	33.1472 N 117.0806 W	female	NA	NA	NA	adult	female	thorax		33.1472	-117.081	USA	Positive	2	482	59	52	10603	10	7
SRR11471603	5643061	1692918300	300	CA1201	WGS	RANDOM	GENOMIC	PAIRED	ILLUMINA	Illumina HiSeq 4000	PRJNA622776	SAMN14526783	CA1201	NA	foraging on vegetation	6/24/2018	USA: California	wing muscle	adult	35.9861 N 120.8792 W	female	NA	NA	NA	adult	female	thorax		35.9861	-120.879	USA	Positive	2	379	104	106	10551	23	12
SRR11471447	6511559	1953467700	300	AR2608	WGS	RANDOM	GENOMIC	PAIRED	ILLUMINA	Illumina HiSeq 4000	PRJNA622776	SAMN14526675	AR2608	NA	foraging on vegetation	1/19/2018	Argentina	wing muscle	adult	29.1528 S 59.6742 W	female	NA	NA	NA	adult	female	thorax		-29.1528	-59.6742	Argentina	Positive	2	376	57	35	11004	22	17
SRR14703839	65114443	19664561786	302	Aint_903	WGS	RANDOM	GENOMIC	PAIRED	ILLUMINA	HiSeq X Five	PRJNA729035	SAMN19109570	Aint_903	Apis_mellifera_Aint_903	Not Applicable	Not Collected	Morocco: Asilah	Previously Extracted DNA	Adult	35.470011 N 6.029983 W	female	NA	NA	NA	adult	female	NA		35.47	-6.02998	Morocco	Positive	2	315	7	32	8467	49	36
SRR11471597	5664996	1699498800	300	CA1314	WGS	RANDOM	GENOMIC	PAIRED	ILLUMINA	Illumina HiSeq 4000	PRJNA622776	SAMN14526789	CA1314	NA	foraging on vegetation	6/26/2018	USA: California	wing muscle	adult	36.245 N 121.0358 W	female	NA	NA	NA	adult	female	thorax		36.245	-121.036	USA	Positive	2	386	28	32	11018	33	0
SRR11471625	5536743	1661022900	300	CA1005	WGS	RANDOM	GENOMIC	PAIRED	ILLUMINA	Illumina HiSeq 4000	PRJNA622776	SAMN14526765	CA1005	NA	foraging on vegetation	6/25/2018	USA: California	wing muscle	adult	35.2242 N 120.5986 W	female	NA	NA	NA	adult	female	thorax		35.2242	-120.599	USA	Positive	2	340	42	68	11235	42	0
SRR11471594	6398380	1919514000	300	CA1319	WGS	RANDOM	GENOMIC	PAIRED	ILLUMINA	Illumina HiSeq 4000	PRJNA622776	SAMN14526792	CA1319	NA	foraging on vegetation	6/26/2018	USA: California	wing muscle	adult	36.2675 N 121.1469 W	female	NA	NA	NA	adult	female	thorax		36.2675	-121.147	USA	Positive	2	345	33	33	10909	46	2
SRR11471616	5357008	1607102400	300	CA1122	WGS	RANDOM	GENOMIC	PAIRED	ILLUMINA	Illumina HiSeq 4000	PRJNA622776	SAMN14526773	CA1122	NA	foraging on vegetation	6/25/2018	USA: California	wing muscle	adult	35.5344 N 120.5519 W	female	NA	NA	NA	adult	female	thorax		35.5344	-120.552	USA	Positive	2	417	53	52	11389	24	8
SRR5270367	136495552	13649555200	100	Kenya_S5	WGS	RANDOM	GENOMIC	SINGLE	ILLUMINA	Illumina HiSeq 2000	PRJNA294105	SAMN06342759	Kenya_S5	worker bee	not applicable	1995	Kenya: Africa replicate 5	whole body	NA	NA	female	adult	NA	NA	NA	female	whole body		NA	NA	Kenya	Positive	0	69	82	103	1933	0	86
SRR11471467	8081478	2424443400	300	AR2215	WGS	RANDOM	GENOMIC	PAIRED	ILLUMINA	Illumina HiSeq 4000	PRJNA622776	SAMN14526657	AR2215	NA	foraging on vegetation	1/18/2018	Argentina	wing muscle	adult	30.2517 S 59.9703 W	female	NA	NA	NA	adult	female	thorax		-30.2517	-59.9703	Argentina	Positive	0	451	276	289	10113	16	30
SRR14703870	77223273	23321428446	302	Ayem_eth1	WGS	RANDOM	GENOMIC	PAIRED	ILLUMINA	HiSeq X Five	PRJNA729035	SAMN19109599	Ayem_eth1	Apis_mellifera_Ayem_eth1	Not Applicable	2006	Ethiopia: Daba	1/2 thorax	Adult	9.383214 N 41.965539 E	female	NA	NA	NA	adult	female	thorax		9.38321	41.9655	Ethiopia	Positive	0	546	41	67	7509	44	124
SRR3157091	7136133	1427226600	200	FL3_ATGTCA_L004	WGS	unspecified	GENOMIC	PAIRED	ILLUMINA	Illumina HiSeq 2500	PRJNA311274	SAMN04481186	RJ7	RJ7	Hive	2014	France	Thorax	Puape/Larvae	NA	male	NA	NA	NA	larval/pupal	male	thorax		NA	NA	France	Positive	360	0	0	0	4167	78	0
SRR14703868	64255022	19405016644	302	Ayem_eth3	WGS	RANDOM	GENOMIC	PAIRED	ILLUMINA	HiSeq X Five	PRJNA729035	SAMN19109601	Ayem_eth3	Apis_mellifera_Ayem_eth3	Not Applicable	2006	Ethiopia: Daba	1/2 thorax	Adult	9.383214 N 41.965539 E	female	NA	NA	NA	adult	female	thorax		9.38321	41.9655	Ethiopia	Positive	0	545	47	86	8107	202	93
SRR15173759	11719824	3515947200	300	ESP24_GTTTCG_L007	WGS	size fractionation	GENOMIC	PAIRED	ILLUMINA	Illumina HiSeq 2500	PRJNA311274	SAMN20257119	ESP24	ESP24	Hive	2014	Spain: Central Transect 9	thorax	NA	NA	male	NA	NA	NA	NA	male	thorax		NA	NA	Spain	Positive	0	291	104	136	6744	258	0
SRR11471531	7781739	2334521700	300	AR1302	WGS	RANDOM	GENOMIC	PAIRED	ILLUMINA	Illumina HiSeq 4000	PRJNA622776	SAMN14526599	AR1302	NA	foraging on vegetation	1/16/2018	Argentina	wing muscle	adult	32.7425 S 60.7531 W	female	NA	NA	NA	adult	female	thorax		-32.7425	-60.7531	Argentina	Positive	0	561	99	110	10429	14	23
SRR11471658	6965757	2089727100	300	CA0505	WGS	RANDOM	GENOMIC	PAIRED	ILLUMINA	Illumina HiSeq 4000	PRJNA622776	SAMN14526735	CA0505	NA	foraging on vegetation	6/18/2018	USA: California	wing muscle	adult	34.0792 N 117.9231 W	female	NA	NA	NA	adult	female	thorax		34.0792	-117.923	USA	Positive	0	315	120	104	7351	13	16
SRR10572005	49931867	14979560100	300	15_P2_H7	WGS	unspecified	GENOMIC	PAIRED	ILLUMINA	Illumina NovaSeq 6000	PRJNA592197	SAMN13415892	Backcross_offspring#15	RSA2017_248_8	RSA2017_248	1/29/2018	South Africa: Stellenbosch	larva	NA	NA	female	NA	NA	NA	larval/pupal	female	NA		NA	NA	South Africa	Positive	0	323	147	169	8773	106	277
SRR11471477	9308266	2792479800	300	AR2016	WGS	RANDOM	GENOMIC	PAIRED	ILLUMINA	Illumina HiSeq 4000	PRJNA622776	SAMN14526648	AR2016	NA	foraging on vegetation	1/18/2018	Argentina	wing muscle	adult	30.6569 S 59.9706 W	female	NA	NA	NA	adult	female	thorax		-30.6569	-59.9706	Argentina	Positive	0	384	175	156	10051	9	13
SRR10571965	51930152	15579045600	300	6_P1_D4	WGS	unspecified	GENOMIC	PAIRED	ILLUMINA	Illumina NovaSeq 6000	PRJNA592197	SAMN13415884	Backcross_offspring#6	RSA2017_247_2	RSA2017_247	1/29/2018	South Africa: Stellenbosch	larva	NA	NA	female	NA	NA	NA	larval/pupal	female	NA		NA	NA	South Africa	Positive	0	408	54	162	8862	157	240
SRR11471480	5419083	1625724900	300	AR2008	WGS	RANDOM	GENOMIC	PAIRED	ILLUMINA	Illumina HiSeq 4000	PRJNA622776	SAMN14526645	AR2008	NA	foraging on vegetation	1/18/2018	Argentina	wing muscle	adult	30.7392 S 59.9958 W	female	NA	NA	NA	adult	female	thorax		-30.7392	-59.9958	Argentina	Positive	0	607	59	55	10609	9	18
SRR11471614	6546253	1963875900	300	CA1103	WGS	RANDOM	GENOMIC	PAIRED	ILLUMINA	Illumina HiSeq 4000	PRJNA622776	SAMN14526775	CA1103	NA	foraging on vegetation	6/24/2018	USA: California	wing muscle	adult	35.6308 N 120.69 W	female	NA	NA	NA	adult	female	thorax		35.6308	-120.69	USA	Positive	0	472	113	109	10313	29	10
SRR11471452	6827067	2048120100	300	AR2513	WGS	RANDOM	GENOMIC	PAIRED	ILLUMINA	Illumina HiSeq 4000	PRJNA622776	SAMN14526671	AR2513	NA	foraging on vegetation	1/19/2018	Argentina	wing muscle	adult	29.4942 S 59.7617 W	female	NA	NA	NA	adult	female	thorax		-29.4942	-59.7617	Argentina	Positive	0	456	92	109	9781	10	13
SRR11471455	7207443	2162232900	300	AR2504	WGS	RANDOM	GENOMIC	PAIRED	ILLUMINA	Illumina HiSeq 4000	PRJNA622776	SAMN14526668	AR2504	NA	foraging on vegetation	1/19/2018	Argentina	wing muscle	adult	29.5167 S 59.7689 W	female	NA	NA	NA	adult	female	thorax		-29.5167	-59.7689	Argentina	Positive	0	489	108	87	10319	5	43
SRR11471628	6074330	1822299000	300	AR0510	WGS	RANDOM	GENOMIC	PAIRED	ILLUMINA	Illumina HiSeq 4000	PRJNA622776	SAMN14526547	AR0510	NA	foraging on vegetation	1/23/2018	Argentina	wing muscle	adult	35.3867 S 60.9508 W	female	NA	NA	NA	adult	female	thorax		-35.3867	-60.9508	Argentina	Positive	0	431	139	114	10523	8	18
SRR10572004	55369931	16610979300	300	16_P3_A8	WGS	unspecified	GENOMIC	PAIRED	ILLUMINA	Illumina NovaSeq 6000	PRJNA592197	SAMN13415893	Backcross_offspring#16	RSA2017_248_9	RSA2017_248	1/29/2018	South Africa: Stellenbosch	larva	NA	NA	female	NA	NA	NA	larval/pupal	female	NA		NA	NA	South Africa	Positive	0	400	81	93	9085	161	237
SRR11471386	7759893	2327967900	300	CA0416	WGS	RANDOM	GENOMIC	PAIRED	ILLUMINA	Illumina HiSeq 4000	PRJNA622776	SAMN14526730	CA0416	NA	foraging on vegetation	6/18/2018	USA: California	wing muscle	adult	33.845 N 117.5358 W	female	NA	NA	NA	adult	female	thorax		33.845	-117.536	USA	Positive	0	438	99	88	10235	22	13
SRR10571988	66266833	19880049900	300	31_P4_B9	WGS	unspecified	GENOMIC	PAIRED	ILLUMINA	Illumina NovaSeq 6000	PRJNA592197	SAMN13415908	Backcross_offspring#31	RSA2017_248_24	RSA2017_248	1/29/2018	South Africa: Stellenbosch	larva	NA	NA	female	NA	NA	NA	larval/pupal	female	NA		NA	NA	South Africa	Positive	0	391	75	78	9119	105	272
SRR5580849	70432353	7043235300	100	SRCD12C	WGS	RANDOM	GENOMIC	SINGLE	ILLUMINA	Illumina HiSeq 2000	PRJNA385500	SAMN06921503	SRCD12C	worker bee	Arcata, Residential	2014	USA:CA,Humboldt County, Union Street, Arcata, California, replicate 3	whole body	NA	NA	female	adult	NA	NA	adult	female	whole body		NA	NA	USA	Positive	280	2	0	0	4783	16	0
SRR14703874	59478554	17962523308	302	Auni_mad14	WGS	RANDOM	GENOMIC	PAIRED	ILLUMINA	HiSeq X Five	PRJNA729035	SAMN19109637	Auni_mad14	Apis_mellifera_Auni_mad14	Not Applicable	2009	Madagascar	1/2 head	Adult	NA	female	NA	NA	NA	adult	female	head		NA	NA	Madagascar	Positive	0	427	50	37	9087	11	39
SRR11471626	12033733	3610119900	300	CA1020	WGS	RANDOM	GENOMIC	PAIRED	ILLUMINA	Illumina HiSeq 4000	PRJNA622776	SAMN14526764	CA1020	NA	foraging on vegetation	6/25/2018	USA: California	wing muscle	adult	35.1878 N 120.4956 W	female	NA	NA	NA	adult	female	thorax		35.1878	-120.496	USA	Positive	0	374	110	107	10609	33	0
SRR11471542	5775366	1732609800	300	AR1106	WGS	RANDOM	GENOMIC	PAIRED	ILLUMINA	Illumina HiSeq 4000	PRJNA622776	SAMN14526589	AR1106	NA	foraging on vegetation	1/21/2018	Argentina	wing muscle	adult	33.2514 S 60.3072 W	female	NA	NA	NA	adult	female	thorax		-33.2514	-60.3072	Argentina	Positive	0	503	44	54	10869	34	2
SRR11471473	14427392	4328217600	300	AR2203	WGS	RANDOM	GENOMIC	PAIRED	ILLUMINA	Illumina HiSeq 4000	PRJNA622776	SAMN14526652	AR2203	NA	foraging on vegetation	1/18/2018	Argentina	wing muscle	adult	30.3708 S 59.9664 W	female	NA	NA	NA	adult	female	thorax		-30.3708	-59.9664	Argentina	Positive	0	361	108	101	10382	21	0
SRR11471622	7336857	2201057100	300	CA1115	WGS	RANDOM	GENOMIC	PAIRED	ILLUMINA	Illumina HiSeq 4000	PRJNA622776	SAMN14526768	CA1115	NA	foraging on vegetation	6/25/2018	USA: California	wing muscle	adult	35.3908 N 120.5897 W	female	NA	NA	NA	adult	female	thorax		35.3908	-120.59	USA	Positive	0	479	49	55	10772	27	17
SRR10571960	65679859	19703957700	300	8_P1_D8	WGS	unspecified	GENOMIC	PAIRED	ILLUMINA	Illumina NovaSeq 6000	PRJNA592197	SAMN13415886	Backcross_offspring#8	RSA2017_248_2	RSA2017_248	1/29/2018	South Africa: Stellenbosch	larva	NA	NA	female	NA	NA	NA	larval/pupal	female	NA		NA	NA	South Africa	Positive	0	377	20	55	8632	0	0
SRR14703854	82384204	24880029608	302	Acap_RSA307	WGS	RANDOM	GENOMIC	PAIRED	ILLUMINA	HiSeq X Five	PRJNA729035	SAMN19109695	Acap_RSA307	Apis_mellifera_Acap_RSA307	Not Applicable	Not Collected	South Africa	1/2 Thorax	Adult	NA	male	NA	NA	NA	adult	male	thorax		NA	NA	South Africa	Positive	0	358	25	41	8389	0	132
SRR11471536	5314583	1594374900	300	AR1208	WGS	RANDOM	GENOMIC	PAIRED	ILLUMINA	Illumina HiSeq 4000	PRJNA622776	SAMN14526594	AR1208	NA	foraging on vegetation	1/15/2018	Argentina	wing muscle	adult	32.9486 S 60.6269 W	female	NA	NA	NA	adult	female	thorax		-32.9486	-60.6269	Argentina	Positive	0	385	89	87	11117	15	12
SRR11471554	6691246	2007373800	300	AR1008	WGS	RANDOM	GENOMIC	PAIRED	ILLUMINA	Illumina HiSeq 4000	PRJNA622776	SAMN14526578	AR1008	NA	foraging on vegetation	1/22/2018	Argentina	wing muscle	adult	33.6764 S 60.3981 W	female	NA	NA	NA	adult	female	thorax		-33.6764	-60.3981	Argentina	Positive	0	445	37	39	10846	11	14
SRR14703871	67791330	20472981660	302	Auni_mad18	WGS	RANDOM	GENOMIC	PAIRED	ILLUMINA	HiSeq X Five	PRJNA729035	SAMN19109640	Auni_mad18	Apis_mellifera_Auni_mad18	Not Applicable	2009	Madagascar	1/2 head	Adult	NA	female	NA	NA	NA	adult	female	head		NA	NA	Madagascar	Positive	0	387	6	36	9109	8	2
SRR11471502	5354808	1606442400	300	AR1606	WGS	RANDOM	GENOMIC	PAIRED	ILLUMINA	Illumina HiSeq 4000	PRJNA622776	SAMN14526629	AR1606	NA	foraging on vegetation	1/17/2018	Argentina	wing muscle	adult	31.6644 S 60.7628 W	female	NA	NA	NA	adult	female	thorax		-31.6644	-60.7628	Argentina	Positive	0	405	40	61	10822	19	2
SRR11471456	5730912	1719273600	300	AR2502	WGS	RANDOM	GENOMIC	PAIRED	ILLUMINA	Illumina HiSeq 4000	PRJNA622776	SAMN14526667	AR2502	NA	foraging on vegetation	1/19/2018	Argentina	wing muscle	adult	29.5894 S 59.7711 W	female	NA	NA	NA	adult	female	thorax		-29.5894	-59.7711	Argentina	Positive	0	331	20	36	8302	16	20
SRR1425486	38203225	7640645000	200	ED18	WGS	RANDOM	GENOMIC	PAIRED	ILLUMINA	Illumina HiSeq 2000	PRJNA252997	SAMN02866008	ED18	NA	NA	NA	NA	upper-body	NA	NA	male	1	NA	NA	NA	male	NA		NA	NA	NA	Positive	219	0	0	0	4716	13	0
SRR3037352	123885463	25024863526	202	888Queen	WGS	unspecified	GENOMIC	PAIRED	ILLUMINA	Illumina HiSeq 2500	PRJNA306271	SAMN04348930	AM-Q-888-3	Queen	colony 888	2013	USA: Fallbrook, CA	abdomen	NA	NA	NA	NA	NA	NA	NA	NA	abdomen	y	NA	NA	USA	Positive	290	0	0	2	6387	2	8
SRR11471558	6514645	1954393500	300	AR1019	WGS	RANDOM	GENOMIC	PAIRED	ILLUMINA	Illumina HiSeq 4000	PRJNA622776	SAMN14526574	AR1019	NA	foraging on vegetation	1/22/2018	Argentina	wing muscle	adult	33.7536 S 60.4401 W	female	NA	NA	NA	adult	female	thorax		-33.7536	-60.4401	Argentina	Positive	0	409	47	50	11296	36	0
SRR10572010	74747829	22424348700	300	2_GF_112	WGS	unspecified	GENOMIC	PAIRED	ILLUMINA	Illumina NovaSeq 6000	PRJNA592197	SAMN13415879	Scut_grandfather	RSA2016_509_1	RSA2016_509	1/29/2018	South Africa: Stellenbosch	thorax muscles	NA	NA	male	NA	NA	NA	adult	male	thorax		NA	NA	South Africa	Positive	391	0	0	0	8792	194	84
SRR11471662	5568000	1670400000	300	CA0427	WGS	RANDOM	GENOMIC	PAIRED	ILLUMINA	Illumina HiSeq 4000	PRJNA622776	SAMN14526732	CA0427	NA	foraging on vegetation	8/5/2018	USA: California	wing muscle	adult	33.9447 N 117.4969 W	female	NA	NA	NA	adult	female	thorax		33.9447	-117.497	USA	Positive	0	393	57	44	11138	18	8
SRR10055251	11668538	2940471576	252	Cap-SB-2-3	WGS	RANDOM	GENOMIC	PAIRED	ILLUMINA	Illumina HiSeq 2500	PRJNA516678	SAMN12671495	cap_sb_2_3	not applicable	not applicable	missing	South Africa	whole individual	larval/pupal	NA	male	NA	drone	NA	larval/pupal	male	whole body		NA	NA	South Africa	Positive	276	0	0	0	6487	53	134
SRR3037357	100070976	20214337152	202	894Drone	WGS	unspecified	GENOMIC	PAIRED	ILLUMINA	Illumina HiSeq 2500	PRJNA306271	SAMN04348935	AM-D-894-8	Drone	colony 894	2013	USA: Fallbrook, CA	abdomen	NA	NA	NA	NA	NA	NA	NA	NA	abdomen		NA	NA	USA	Positive	206	12	18	25	6137	4	0
SRR3037354	51712861	10445997922	202	882Queen	WGS	unspecified	GENOMIC	PAIRED	ILLUMINA	Illumina HiSeq 2500	PRJNA306271	SAMN04348932	AM-Q-882-5	Queen	colony 882	2013	USA: Fallbrook, CA	abdomen	NA	NA	NA	NA	NA	NA	NA	NA	abdomen	y	NA	NA	USA	Positive	278	2	0	0	6636	4	0
SRR14703841	61477961	18566344222	302	Aint_902	WGS	RANDOM	GENOMIC	PAIRED	ILLUMINA	HiSeq X Five	PRJNA729035	SAMN19109569	Aint_902	Apis_mellifera_Aint_902	Not Applicable	Not Collected	Morocco: Asilah	Previously Extracted DNA	Adult	35.470011 N 6.029983 W	female	NA	NA	NA	adult	female	NA		35.47	-6.02998	Morocco	Positive	0	300	4	32	8273	2	147
SRR15173819	31183254	9354976200	300	BS16-8-M4_ATTACTCG-GGCTCTGA-BHCFFJDSXX_L003	WGS	size fractionation	GENOMIC	PAIRED	ILLUMINA	Illumina NovaSeq 6000	PRJNA311274	SAMN20257611	BS16-8-M4	BS16-8-M4	Hive	2014	France: Vaucluse	thorax	NA	NA	male	NA	NA	NA	NA	male	thorax		NA	NA	France	Positive	355	0	0	0	8777	92	0
SRR6347786	19980902	3996180400	200	RSZAIPI005400-135	WGS	size fractionation	GENOMIC	PAIRED	ILLUMINA	Illumina HiSeq 2000	PRJNA381313	SAMN08132940	b238_RSZAIPI005400-135_gAHB	NA	NA	2013	Puerto Rico	thorax	NA	NA	male	NA	NA	NA	NA	male	thorax		NA	NA	USA	Positive	188	0	0	0	4751	31	0
SRR15173516	19598682	5879604600	300	UK18A_TAGCTT_L006	WGS	size fractionation	GENOMIC	PAIRED	ILLUMINA	Illumina HiSeq 2500	PRJNA311274	SAMN20257388	UK18A	UK18A	Hive	2014	United Kingdom: Scotland	thorax	NA	NA	male	NA	NA	NA	NA	male	thorax		NA	NA	United Kingdom	Positive	347	2	0	0	8902	203	0
SRR11471644	7573461	2272038300	300	CA0819	WGS	RANDOM	GENOMIC	PAIRED	ILLUMINA	Illumina HiSeq 4000	PRJNA622776	SAMN14526748	CA0819	NA	foraging on vegetation	8/3/2018	USA: California	wing muscle	adult	34.4436 N 118.7597 W	female	NA	NA	NA	adult	female	thorax		34.4436	-118.76	USA	Positive	0	352	29	62	11362	21	8
SRR10055305	13523256	3407860512	252	Cap-SB-4-5	WGS	RANDOM	GENOMIC	PAIRED	ILLUMINA	Illumina HiSeq 2500	PRJNA516678	SAMN12671508	cap_sb_4_5	not applicable	not applicable	missing	South Africa	whole individual	larval/pupal	NA	male	NA	drone	NA	larval/pupal	male	whole body		NA	NA	South Africa	Positive	249	0	0	0	6406	37	63
SRR15173350	23065204	6919561200	300	BS16-312-M3_GAATTCGT-CAGGACGT-BHCFFJDSXX_L003	WGS	size fractionation	GENOMIC	PAIRED	ILLUMINA	Illumina NovaSeq 6000	PRJNA311274	SAMN20257538	BS16-312-M3	BS16-312-M3	Hive	2014	France: Vaucluse	thorax	NA	NA	male	NA	NA	NA	NA	male	thorax		NA	NA	France	Positive	335	0	0	0	9033	97	0
SRR15173541	35703448	10711034400	300	SOL11_AGTCAA_merged	WGS	size fractionation	GENOMIC	PAIRED	ILLUMINA	Illumina HiSeq 2500	PRJNA311274	SAMN20257366	SOL11	SOL11	Hive	2014	France: Sollies	thorax	NA	NA	male	NA	NA	NA	NA	male	thorax		NA	NA	France	Positive	284	0	0	10	8612	94	0
SRR15173556	11895545	2962679200	249	BER16_CGATGT_merged	WGS	size fractionation	GENOMIC	PAIRED	ILLUMINA	Illumina HiSeq 2500	PRJNA311274	SAMN20257011	BER16	BER16	Hive	2014	Germany	thorax	NA	NA	male	NA	NA	NA	NA	male	thorax		NA	NA	Germany	Positive	200	0	0	0	6127	65	0
SRR10055373	13625175	3433544100	252	Cap-SB-4-9	WGS	RANDOM	GENOMIC	PAIRED	ILLUMINA	Illumina HiSeq 2500	PRJNA516678	SAMN12671502	cap_sb_4_9	not applicable	not applicable	missing	South Africa	whole individual	larval/pupal	NA	male	NA	drone	NA	larval/pupal	male	whole body		NA	NA	South Africa	Positive	195	0	0	0	6242	42	59
SRR15173668	17636069	5290820700	300	ITSAP40_AGTCAA_L003	WGS	size fractionation	GENOMIC	PAIRED	ILLUMINA	Illumina HiSeq 2500	PRJNA311274	SAMN20257201	ITSAP40	ITSAP40	Hive	2014	France: Tarn	thorax	NA	NA	male	NA	NA	NA	NA	male	thorax		NA	NA	France	Positive	234	2	0	0	7799	69	0
SRR15173901	16521957	4956587100	300	BR39_GTGAAA_L002	WGS	size fractionation	GENOMIC	PAIRED	ILLUMINA	Illumina HiSeq 2500	PRJNA311274	SAMN20257045	BR39	BR39	Hive34	2014	France: Ariege	thorax	NA	NA	male	NA	NA	NA	NA	male	thorax		NA	NA	France	Positive	242	0	0	0	8184	47	0
SRR14703848	63583816	19202312432	302	Acauca_821	WGS	RANDOM	GENOMIC	PAIRED	ILLUMINA	HiSeq X Five	PRJNA729035	SAMN19109568	Acauca_821	Apis_mellifera_Acauca_821	Not Applicable	1995	Turkey: Ardahan	Previously Extracted DNA	Adult	41.112222 N 42.702222 E	female	NA	NA	NA	adult	female	NA		41.1122	42.7022	Turkey	Positive	0	192	17	32	8177	91	0
SRR15173388	34593908	10378172400	300	BS16-301-M2_GAGATTCC-ATAGAGGC-BHCFFJDSXX_L003	WGS	size fractionation	GENOMIC	PAIRED	ILLUMINA	Illumina NovaSeq 6000	PRJNA311274	SAMN20257503	BS16-301-M2	BS16-301-M2	Hive	2014	France: Vaucluse	thorax	NA	NA	male	NA	NA	NA	NA	male	thorax		NA	NA	France	Positive	249	0	0	0	8927	107	0
SRR10714377	59111188	11571612646	195	Sample_S63	WGS	RANDOM	GENOMIC	PAIRED	ILLUMINA	Illumina HiSeq 2500	PRJNA596071	SAMN13611959	S63	NA	drone	7/29/2014	Germany: Werdau	flight muscle	NA	NA	male	NA	NA	NA	NA	male	thorax		NA	NA	Germany	Positive	81	0	2	77	5756	2250	0
SRR6236958	19853889	5956166700	300	RUN2_AGTCAA_L005	WGS	size fractionation	GENOMIC	PAIRED	ILLUMINA	Illumina HiSeq 2500	PRJNA311274	SAMN07956297	REUh2	REUh2	Hive	2014	France: Reunion	Thorax	Puape/Larvae	NA	male	NA	NA	NA	larval/pupal	male	thorax		NA	NA	France	Positive	195	0	0	8	7440	67	0
SRR15173703	19358357	5807507100	300	ITSAP105_CGTACG_L005	WGS	size fractionation	GENOMIC	PAIRED	ILLUMINA	Illumina HiSeq 2500	PRJNA311274	SAMN20257170	ITSAP105	ITSAP105	Hive	2014	France: Isere	thorax	NA	NA	male	NA	NA	NA	NA	male	thorax		NA	NA	France	Positive	211	0	0	0	7815	113	0
SRR15173701	15457239	4637171700	300	ITSAP11_CCGTCC_L002	WGS	size fractionation	GENOMIC	PAIRED	ILLUMINA	Illumina HiSeq 2500	PRJNA311274	SAMN20257172	ITSAP11	ITSAP11	Hive	2014	France	thorax	NA	NA	male	NA	NA	NA	NA	male	thorax		NA	NA	France	Positive	178	0	0	0	8287	141	0
SRR15173586	22247104	6674131200	300	POL27_GAGTGG_L005	WGS	size fractionation	GENOMIC	PAIRED	ILLUMINA	Illumina HiSeq 2500	PRJNA311274	SAMN20257325	POL27	POL27	Hive	2014	Poland	thorax	NA	NA	male	NA	NA	NA	NA	male	thorax		NA	NA	Poland	Positive	149	0	0	0	7443	117	0
SRR15173934	20232750	6069825000	300	KF43_ACAGTG_L002	WGS	size fractionation	GENOMIC	PAIRED	ILLUMINA	Illumina HiSeq 2500	PRJNA311274	SAMN20257297	KF43	KF43	Hive	2014	France: Tarn	thorax	NA	NA	male	NA	NA	NA	NA	male	thorax		NA	NA	France	Positive	136	0	0	0	7980	189	0
SRR10714365	32137417	6246826538	194	Sample_S75	WGS	RANDOM	GENOMIC	PAIRED	ILLUMINA	Illumina HiSeq 2500	PRJNA596071	SAMN13611970	S75	NA	drone	8/5/2014	Germany: Luebbecke	flight muscle	NA	NA	male	NA	NA	NA	NA	male	thorax		NA	NA	Germany	Positive	48	0	0	66	7002	0	0
SRR10714401	47561546	9298707758	195	Sample_S37	WGS	RANDOM	GENOMIC	PAIRED	ILLUMINA	Illumina HiSeq 2500	PRJNA596071	SAMN13611937	S37	11	drone	2014	Slovenia: Ljubljana	flight muscle	NA	NA	male	NA	NA	NA	NA	male	thorax		NA	NA	Slovenia	Positive	0	0	0	27	2527	12	0
SRR5580800	31660482	3166048200	100	ap39_rep1	WGS	RANDOM	GENOMIC	SINGLE	ILLUMINA	Illumina HiSeq 2000	PRJNA385500	SAMN06921469	ap39	worker bee	San Jacinto Mountains	1983	USA:CA, Riverside Co. San Jacinto Mnt., replicate 2	whole body	NA	NA	female	adult	NA	NA	adult	female	whole body		NA	NA	USA	Positive	0	0	0	15	1737	34	0
SRR15173730	15026530	4507959000	300	ITA14A_AGTTCC_L004	WGS	size fractionation	GENOMIC	PAIRED	ILLUMINA	Illumina HiSeq 2500	PRJNA311274	SAMN20257145	ITA14A	ITA14A	Hive	2014	Italy	thorax	NA	NA	male	NA	NA	NA	NA	male	thorax		NA	NA	Italy	Positive	0	0	0	41	7317	163	0
SRR5580788	26261068	2626106800	100	ap34_rep1	WGS	RANDOM	GENOMIC	SINGLE	ILLUMINA	Illumina HiSeq 2000	PRJNA385500	SAMN06921464	ap34	worker bee	Nature Preserve	1999	USA:CA, Riverside Co. 1000 Palms Oasis, replicate 1	whole body	NA	NA	female	adult	NA	NA	adult	female	whole body		NA	NA	USA	Positive	0	0	0	18	3337	28	0
ERR5665186	15706697	4181900740	266	unspecified	WGS	other	GENOMIC	PAIRED	ILLUMINA	Illumina HiSeq 3000	PRJEB34590	SAMEA7109108	SAMEA7109108	NA	NA	1947	Switzerland	NA	NA	NA	worker	NA	NA	NA	NA	female	NA		NA	NA	Switzerland	Positive	0	0	0	48	9594	0	0
SRR11471474	6464861	1939458300	300	AR2202	WGS	RANDOM	GENOMIC	PAIRED	ILLUMINA	Illumina HiSeq 4000	PRJNA622776	SAMN14526651	AR2202	NA	foraging on vegetation	1/18/2018	Argentina	wing muscle	adult	30.3928 S 59.9469 W	female	NA	NA	NA	adult	female	thorax		-30.3928	-59.9469	Argentina	Positive	0	0	0	12	2477	2	8
SRR10572002	56430904	16929271200	300	18_P3_C5	WGS	unspecified	GENOMIC	PAIRED	ILLUMINA	Illumina NovaSeq 6000	PRJNA592197	SAMN13415895	Backcross_offspring#18	RSA2017_248_11	RSA2017_248	1/29/2018	South Africa: Stellenbosch	larva	NA	NA	female	NA	NA	NA	larval/pupal	female	NA		NA	NA	South Africa	Positive	0	0	0	43	8966	100	252
SRR10571977	59932153	17979645900	300	41_P4_G8	WGS	unspecified	GENOMIC	PAIRED	ILLUMINA	Illumina NovaSeq 6000	PRJNA592197	SAMN13415918	Backcross_offspring#41	RSA2017_248_34	RSA2017_248	1/29/2018	South Africa: Stellenbosch	larva	NA	NA	female	NA	NA	NA	larval/pupal	female	NA		NA	NA	South Africa	Positive	0	0	0	46	9593	110	271
SRR15173768	8801668	2640500400	300	ESP17_AGTCAA_L007	WGS	size fractionation	GENOMIC	PAIRED	ILLUMINA	Illumina HiSeq 2500	PRJNA311274	SAMN20257111	ESP17	ESP17	Hive	2014	Spain: Central Transect 1	thorax	NA	NA	male	NA	NA	NA	NA	male	thorax		NA	NA	Spain	Positive	0	0	0	40	8826	0	0
ERR5665169	21039452	5741156278	272	unspecified	WGS	other	GENOMIC	PAIRED	ILLUMINA	Illumina HiSeq 3000	PRJEB34590	SAMEA7109111	SAMEA7109111	NA	NA	1948	Switzerland	NA	NA	NA	worker	NA	NA	NA	NA	female	NA		NA	NA	Switzerland	Positive	0	0	0	33	7453	0	0
SRR6236917	19538449	5861534700	300	SE12-m2_GGCTAC_L005	WGS	size fractionation	GENOMIC	PAIRED	ILLUMINA	Illumina HiSeq 2500	PRJNA311274	SAMN07956301	SEY12	SEY12	Hive	2014	Seychelles	Thorax	Puape/Larvae	NA	male	NA	NA	NA	larval/pupal	male	thorax		NA	NA	Seychelles	Positive	0	0	0	30	6788	95	0
SRR2163184	16925909	3283626346	194	Scout_12	WGS	RANDOM	GENOMIC	PAIRED	ILLUMINA	Illumina HiSeq 2000	PRJNA292680	SAMN03983485	Scout_12	S12	NA	2011	USA: University of Illinois Bee Research Facility, Urbana, IL	whole body	forager	NA	female	adult	NA	NA	adult	female	whole body		NA	NA	USA	Positive	0	0	0	16	3767	14	0
SRR15173773	13499456	4049836800	300	ESP12_ACTTGA_L007	WGS	size fractionation	GENOMIC	PAIRED	ILLUMINA	Illumina HiSeq 2500	PRJNA311274	SAMN20257106	ESP12	ESP12	Hive	2014	Spain: Central Transect 1	thorax	NA	NA	male	NA	NA	NA	NA	male	thorax		NA	NA	Spain	Positive	0	0	0	12	2924	111	0
SRR5580843	16863445	1686344500	100	SRCD53B	WGS	RANDOM	GENOMIC	SINGLE	ILLUMINA	Illumina HiSeq 2000	PRJNA385500	SAMN06921506	SRCD53B	worker bee	Arcata, Residential	2014	USA:CA,Humboldt County, Union Street, Arcata, California, replicate 6	whole body	NA	NA	female	adult	NA	NA	adult	female	whole body		NA	NA	USA	Positive	0	0	0	18	4428	40	0
SRR5580789	33071799	3307179900	100	ap50_rep1	WGS	RANDOM	GENOMIC	SINGLE	ILLUMINA	Illumina HiSeq 2000	PRJNA385500	SAMN06921465	ap50	worker bee	Nature Preserve	1999	USA:CA, Riverside Co. 1000 Palms Oasis, replicate 2	whole body	NA	NA	female	adult	NA	NA	adult	female	whole body		NA	NA	USA	Positive	0	0	0	16	3944	38	0
SRR14654187	21449670	6392001660	298	A5_S19	WGS	unspecified	GENOMIC	PAIRED	ILLUMINA	NextSeq 550	PRJNA732718	SAMN19338891	A5 Drone	AHB A5 Drone	Langstroth hive	2020-10	USA: Texas	Abdomen	NA	NA	NA	NA	NA	NA	NA	NA	abdomen		NA	NA	USA	Positive	0	0	0	33	8205	122	140
SRR18662667	33158044	9691672776	292	2AD	WGS	PCR	GENOMIC	PAIRED	ILLUMINA	NextSeq 2000	PRJNA824063	SAMN27386756	2AD	Reciprocal cross colony A cross 2 drone	Langstroth hive	2020-10	USA: Pennsylvania	Brain	NA	NA	NA	NA	NA	NA	NA	NA	head		NA	NA	USA	Positive	0	0	0	30	8118	198	0
SRR10571986	60891182	18267354600	300	32_P4_C7	WGS	unspecified	GENOMIC	PAIRED	ILLUMINA	Illumina NovaSeq 6000	PRJNA592197	SAMN13415909	Backcross_offspring#32	RSA2017_248_25	RSA2017_248	1/29/2018	South Africa: Stellenbosch	larva	NA	NA	female	NA	NA	NA	larval/pupal	female	NA		NA	NA	South Africa	Positive	0	0	0	34	9246	83	262
SRR10572007	51062833	15318849900	300	13_P2_E8	WGS	unspecified	GENOMIC	PAIRED	ILLUMINA	Illumina NovaSeq 6000	PRJNA592197	SAMN13415890	Backcross_offspring#13	RSA2017_248_6	RSA2017_248	1/29/2018	South Africa: Stellenbosch	larva	NA	NA	female	NA	NA	NA	larval/pupal	female	NA		NA	NA	South Africa	Positive	0	0	0	32	9062	87	207
SRR10571984	60599664	18179899200	300	34_P4_D3	WGS	unspecified	GENOMIC	PAIRED	ILLUMINA	Illumina NovaSeq 6000	PRJNA592197	SAMN13415911	Backcross_offspring#34	RSA2017_248_27	RSA2017_248	1/29/2018	South Africa: Stellenbosch	larva	NA	NA	female	NA	NA	NA	larval/pupal	female	NA		NA	NA	South Africa	Positive	0	0	0	29	9067	85	270
SRR14703842	46752593	14119283086	302	AiberLugo1_2	WGS	RANDOM	GENOMIC	PAIRED	ILLUMINA	HiSeq X Five	PRJNA729035	SAMN19109632	AiberLugo1_2	Apis_mellifera_AiberLugo1_2	Not Applicable	1984	Spain: Lugo	Previously Extracted DNA	Adult	43.000000 N 7.566667 W	female	NA	NA	NA	adult	female	NA		43	-7.56667	Spain	Positive	0	0	0	19	6423	120	2
SRR10572008	61945409	18583622700	300	12_P2_E1	WGS	unspecified	GENOMIC	PAIRED	ILLUMINA	Illumina NovaSeq 6000	PRJNA592197	SAMN13415889	Backcross_offspring#12	RSA2017_248_5	RSA2017_248	1/29/2018	South Africa: Stellenbosch	larva	NA	NA	female	NA	NA	NA	larval/pupal	female	NA		NA	NA	South Africa	Positive	0	0	0	26	8902	143	274
SRR15173750	15576710	4673013000	300	ESP4_ATTCCT_L006	WGS	size fractionation	GENOMIC	PAIRED	ILLUMINA	Illumina HiSeq 2500	PRJNA311274	SAMN20257127	ESP4	ESP4	Hive	2014	Spain: Mediterranean Transect 1	thorax	NA	NA	male	NA	NA	NA	NA	male	thorax		NA	NA	Spain	Positive	0	0	0	22	7568	212	0
SRR15173448	13660690	4098207000	300	NCA39_AGTCAA_L002	WGS	size fractionation	GENOMIC	PAIRED	ILLUMINA	Illumina HiSeq 2500	PRJNA311274	SAMN20257450	NCA39	NCA39	Hive	2014	New Caledonia	thorax	NA	NA	male	NA	NA	NA	NA	male	thorax		NA	NA	New Caledonia	Positive	0	0	0	22	7876	270	0
SRR10571983	52088474	15626542200	300	35_P4_D6	WGS	unspecified	GENOMIC	PAIRED	ILLUMINA	Illumina NovaSeq 6000	PRJNA592197	SAMN13415912	Backcross_offspring#35	RSA2017_248_28	RSA2017_248	1/29/2018	South Africa: Stellenbosch	larva	NA	NA	female	NA	NA	NA	larval/pupal	female	NA		NA	NA	South Africa	Positive	0	0	0	24	9108	0	0
SRR6236908	15998535	4799560500	300	ITA6A-GCCAAT-L004	WGS	size fractionation	GENOMIC	PAIRED	ILLUMINA	Illumina HiSeq 2500	PRJNA311274	SAMN07956282	ITA6A	ITA6A	Hive	2014	Italy	Thorax	Puape/Larvae	NA	male	NA	NA	NA	larval/pupal	male	thorax		NA	NA	Italy	Positive	0	0	0	23	8800	239	0
SRR10571997	59020773	17706231900	300	22_P3_E7	WGS	unspecified	GENOMIC	PAIRED	ILLUMINA	Illumina NovaSeq 6000	PRJNA592197	SAMN13415899	Backcross_offspring#22	RSA2017_248_15	RSA2017_248	1/29/2018	South Africa: Stellenbosch	larva	NA	NA	female	NA	NA	NA	larval/pupal	female	NA		NA	NA	South Africa	Positive	0	0	0	24	9300	0	0
SRR15173327	28758019	8627405700	300	BS16-319-M4_CGCTCATT-TATAGCCT-BHCFFJDSXX_L004	WGS	size fractionation	GENOMIC	PAIRED	ILLUMINA	Illumina NovaSeq 6000	PRJNA311274	SAMN20257559	BS16-319-M4	BS16-319-M4	Hive	2014	France: Vaucluse	thorax	NA	NA	male	NA	NA	NA	NA	male	thorax		NA	NA	France	Positive	0	0	0	22	8657	120	0
SRR11038136	26580751	8027386802	302	Sample 79	WGS	RANDOM PCR	GENOMIC	PAIRED	ILLUMINA	Illumina HiSeq 4000	PRJNA605407	SAMN14056797	Italian3_7	Honey Bee	Colony	2018-03	USA:Louisiana	Whole body	NA	NA	female	NA	NA	NA	NA	female	whole body		NA	NA	USA	Positive	0	0	0	24	9679	99	0
SRR15173466	15066345	4519903500	300	NCA23_CGTACG_L003	WGS	size fractionation	GENOMIC	PAIRED	ILLUMINA	Illumina HiSeq 2500	PRJNA311274	SAMN20257433	NCA23	NCA23	Hive	2014	New Caledonia	thorax	NA	NA	male	NA	NA	NA	NA	male	thorax		NA	NA	New Caledonia	Positive	0	0	0	20	8072	147	0
SRR7442296	128000732	38333965086	299	riz-lr-id	WGS	PCR	GENOMIC	PAIRED	ILLUMINA	HiSeq X Ten	PRJNA478213	SAMN09501440	CBS_Apismelliferacarnica_D945-R07	NA	NA	NA	NA	thorax	worker bee 1	NA	female	NA	NA	NA	adult	female	thorax		NA	NA	NA	Positive	0	0	0	18	7287	199	0
SRR10548566	60147207	18044162100	300	Fdrone	WGS	unspecified	GENOMIC	PAIRED	ILLUMINA	Illumina NovaSeq 6000	PRJNA592273	SAMN13419549	Father	RSA2016-14	SC 5	11/10/2016	South Africa: Stellenbosch	thorax muscles	NA	NA	male	NA	NA	NA	NA	male	thorax		NA	NA	South Africa	Positive	0	0	0	20	8330	0	0
SRR10571991	55055288	16516586400	300	28_P4_A3	WGS	unspecified	GENOMIC	PAIRED	ILLUMINA	Illumina NovaSeq 6000	PRJNA592197	SAMN13415905	Backcross_offspring#28	RSA2017_248_21	RSA2017_248	1/29/2018	South Africa: Stellenbosch	larva	NA	NA	female	NA	NA	NA	larval/pupal	female	NA		NA	NA	South Africa	Positive	0	0	0	22	9195	87	252
SRR5580811	42451731	4245173100	100	ap52_rep2	WGS	RANDOM	GENOMIC	SINGLE	ILLUMINA	Illumina HiSeq 2000	PRJNA385500	SAMN06921483	SRCD5C	worker bee	Nature Reserve	1996	USA:CA, Solano Co. Stebbins Cold Cyn. Reserve 38 30'N 122 08'W 11 km W. Winters, replicate 2A	whole body	NA	NA	female	adult	NA	NA	adult	female	whole body		NA	NA	USA	Positive	0	0	0	12	5171	19	0
SRR15173727	17528452	5258535600	300	ITA17A_GTCCGC_L004	WGS	size fractionation	GENOMIC	PAIRED	ILLUMINA	Illumina HiSeq 2500	PRJNA311274	SAMN20257148	ITA17A	ITA17A	Hive	2014	Italy	thorax	NA	NA	male	NA	NA	NA	NA	male	thorax		NA	NA	Italy	Positive	0	0	0	18	7860	174	0
SRR14703838	68208497	20598966094	302	Aint_907	WGS	RANDOM	GENOMIC	PAIRED	ILLUMINA	HiSeq X Five	PRJNA729035	SAMN19109571	Aint_907	Apis_mellifera_Aint_907	Not Applicable	Not Collected	Morocco: Asilah	Previously Extracted DNA	Adult	35.470011 N 6.029983 W	female	NA	NA	NA	adult	female	NA		35.47	-6.02998	Morocco	Positive	0	0	0	18	7921	131	10
SRR15173732	18148049	5444414700	300	ITA10A_TAGCTT_L004	WGS	size fractionation	GENOMIC	PAIRED	ILLUMINA	Illumina HiSeq 2500	PRJNA311274	SAMN20257143	ITA10A	ITA10A	Hive	2014	Italy	thorax	NA	NA	male	NA	NA	NA	NA	male	thorax		NA	NA	Italy	Positive	0	0	0	20	8957	243	0
SRR12726896	48462660	12115665000	250	POOL_15_GCCAAT_L004_	WGS	RANDOM	GENOMIC	PAIRED	ILLUMINA	Illumina HiSeq 2500	PRJNA666033	SAMN16277087	POOL_15	NA	hive	2015	Switzerland	head	NA	NA	female	NA	NA	NA	NA	female	head		NA	NA	Switzerland	Positive	0	0	0	18	8180	98	0
SRR10571999	54903663	16471098900	300	21_P3_E4	WGS	unspecified	GENOMIC	PAIRED	ILLUMINA	Illumina NovaSeq 6000	PRJNA592197	SAMN13415898	Backcross_offspring#21	RSA2017_248_14	RSA2017_248	1/29/2018	South Africa: Stellenbosch	larva	NA	NA	female	NA	NA	NA	larval/pupal	female	NA		NA	NA	South Africa	Positive	0	0	0	20	9293	0	0
SRR11471569	9492020	2847606000	300	AR0804	WGS	RANDOM	GENOMIC	PAIRED	ILLUMINA	Illumina HiSeq 4000	PRJNA622776	SAMN14526564	AR0804	NA	foraging on vegetation	1/22/2018	Argentina	wing muscle	adult	34.5581 S 60.9294 W	female	NA	NA	NA	adult	female	thorax		-34.5581	-60.9294	Argentina	Positive	0	0	0	18	8478	25	0
SRR14703795	57698038	17424807476	302	Amel_470	WGS	RANDOM	GENOMIC	PAIRED	ILLUMINA	HiSeq X Five	PRJNA729035	SAMN19109629	Amel_470	Apis_mellifera_Amel_470	Not Applicable	Not Collected	France: Ille Sur Tet	Previously Extracted DNA	Adult	42.670311 N 2.619786 E	female	NA	NA	NA	adult	female	NA		42.6703	2.61979	France	Positive	0	0	0	18	8505	143	0
SRR3037351	104919725	21193784450	202	875Drone	WGS	unspecified	GENOMIC	PAIRED	ILLUMINA	Illumina HiSeq 2500	PRJNA306271	SAMN04348929	AM-D-875-2	Drone	colony 875	2013	USA: Fallbrook, CA	abdomen	NA	NA	NA	NA	NA	NA	NA	NA	abdomen		NA	NA	USA	Positive	0	0	0	14	6915	0	0
SRR11038170	28749525	8682356550	302	Sample 20	WGS	RANDOM PCR	GENOMIC	PAIRED	ILLUMINA	Illumina HiSeq 4000	PRJNA605407	SAMN14056738	Italian1_8	Honey Bee	Colony	2018-03	USA:Louisiana	Whole body	NA	NA	female	NA	NA	NA	NA	female	whole body		NA	NA	USA	Positive	0	0	0	19	9657	147	14
SRR11038165	28771705	8689054910	302	Sample 39	WGS	RANDOM PCR	GENOMIC	PAIRED	ILLUMINA	Illumina HiSeq 4000	PRJNA605407	SAMN14056757	MNHyg3	Honey Bee	Colony	2018-03	USA:Louisiana	Whole body	NA	NA	female	NA	NA	NA	NA	female	whole body		NA	NA	USA	Positive	0	0	0	20	10403	111	5
SRR15173530	45957530	13787259000	300	SOL8_TAGCTT_merged	WGS	size fractionation	GENOMIC	PAIRED	ILLUMINA	Illumina HiSeq 2500	PRJNA311274	SAMN20257375	SOL8	SOL8	Hive	2014	France: Sollies	thorax	NA	NA	male	NA	NA	NA	NA	male	thorax		NA	NA	France	Positive	0	0	0	18	9450	212	0
SRR15173506	15306784	4592035200	300	UK27A_GTGAAA_L006	WGS	size fractionation	GENOMIC	PAIRED	ILLUMINA	Illumina HiSeq 2500	PRJNA311274	SAMN20257397	UK27A	UK27A	Hive	2014	United Kingdom: Scotland	thorax	NA	NA	male	NA	NA	NA	NA	male	thorax		NA	NA	United Kingdom	Positive	0	0	0	16	8425	126	0
SRR11471592	5130329	1539098700	300	CA1410	WGS	RANDOM	GENOMIC	PAIRED	ILLUMINA	Illumina HiSeq 4000	PRJNA622776	SAMN14526793	CA1410	NA	foraging on vegetation	6/24/2018	USA: California	wing muscle	adult	36.5017 N 121.5047 W	female	NA	NA	NA	adult	female	thorax		36.5017	-121.505	USA	Positive	0	0	0	16	8499	35	0
SRR11471591	6179972	1853991600	300	CA1414	WGS	RANDOM	GENOMIC	PAIRED	ILLUMINA	Illumina HiSeq 4000	PRJNA622776	SAMN14526794	CA1414	NA	foraging on vegetation	6/27/2018	USA: California	wing muscle	adult	36.5261 N 121.4478 W	female	NA	NA	NA	adult	female	thorax		36.5261	-121.448	USA	Positive	0	0	0	21	11258	26	0
SRR15173568	33453866	10036159800	300	POR5_CGTACG_merged	WGS	size fractionation	GENOMIC	PAIRED	ILLUMINA	Illumina HiSeq 2500	PRJNA311274	SAMN20257342	POR5	POR5	Hive	2014	France: Porquerolles	thorax	NA	NA	male	NA	NA	NA	NA	male	thorax		NA	NA	France	Positive	0	0	0	16	8613	248	0
SRR11038168	30923514	9338901228	302	Sample 21	WGS	RANDOM PCR	GENOMIC	PAIRED	ILLUMINA	Illumina HiSeq 4000	PRJNA605407	SAMN14056739	Italian1_9	Honey Bee	Colony	2018-03	USA:Louisiana	Whole body	NA	NA	female	NA	NA	NA	NA	female	whole body		NA	NA	USA	Positive	0	0	0	19	10267	97	3
SRR15173753	11392742	3417822600	300	ESP29_GCCAAT_L002	WGS	size fractionation	GENOMIC	PAIRED	ILLUMINA	Illumina HiSeq 2500	PRJNA311274	SAMN20257124	ESP29	ESP29	Hive	2014	Spain: Central Transect 9	thorax	NA	NA	male	NA	NA	NA	NA	male	thorax		NA	NA	Spain	Positive	0	0	0	16	8776	0	0
SRR10548555	66836635	20050990500	300	Larv04	WGS	unspecified	GENOMIC	PAIRED	ILLUMINA	Illumina NovaSeq 6000	PRJNA592273	SAMN13419554	Offspring_#04	RSA2017-286_4	SC 5	2/11/2018	South Africa: Stellenbosch	larva	NA	NA	female	NA	NA	NA	larval/pupal	female	NA		NA	NA	South Africa	Positive	0	0	0	14	8319	0	363
SRR15173566	47429166	14228749800	300	POR6_GAGTGG_merged	WGS	size fractionation	GENOMIC	PAIRED	ILLUMINA	Illumina HiSeq 2500	PRJNA311274	SAMN20257343	POR6	POR6	Hive	2014	France: Porquerolles	thorax	NA	NA	male	NA	NA	NA	NA	male	thorax		NA	NA	France	Positive	0	0	0	14	8319	312	0
SRR11471630	8778287	2633486100	300	CA1015	WGS	RANDOM	GENOMIC	PAIRED	ILLUMINA	Illumina HiSeq 4000	PRJNA622776	SAMN14526761	CA1015	NA	foraging on vegetation	6/25/2018	USA: California	wing muscle	adult	35.1267 N 120.4028 W	female	NA	NA	NA	adult	female	thorax		35.1267	-120.403	USA	Positive	0	0	0	18	10768	27	2
SRR11038159	34356407	10375634914	302	Sample 43	WGS	RANDOM PCR	GENOMIC	PAIRED	ILLUMINA	Illumina HiSeq 4000	PRJNA605407	SAMN14056761	MNHyg7	Honey Bee	Colony	2018-03	USA:Louisiana	Whole body	NA	NA	female	NA	NA	NA	NA	female	whole body		NA	NA	USA	Positive	0	0	0	16	9866	140	18
SRR14703855	66968637	20224528374	302	Acap_RSA261	WGS	RANDOM	GENOMIC	PAIRED	ILLUMINA	HiSeq X Five	PRJNA729035	SAMN19109694	Acap_RSA261	Apis_mellifera_Acap_RSA261	Not Applicable	Not Collected	South Africa	1/2 Thorax	Adult	NA	male	NA	NA	NA	adult	male	thorax		NA	NA	South Africa	Positive	0	0	0	13	8251	113	70
SRR11038167	31674308	9565641016	302	Sample 22	WGS	RANDOM PCR	GENOMIC	PAIRED	ILLUMINA	Illumina HiSeq 4000	PRJNA605407	SAMN14056740	Italian1_10	Honey Bee	Colony	2018-03	USA:Louisiana	Whole body	NA	NA	female	NA	NA	NA	NA	female	whole body		NA	NA	USA	Positive	0	0	0	16	10451	71	17
SRR15173540	45403993	13621197900	300	SOL12_AGTTCC_merged	WGS	size fractionation	GENOMIC	PAIRED	ILLUMINA	Illumina HiSeq 2500	PRJNA311274	SAMN20257367	SOL12	SOL12	Hive	2014	France: Sollies	thorax	NA	NA	male	NA	NA	NA	NA	male	thorax		NA	NA	France	Positive	0	0	0	14	9220	322	0
SRR3037355	95135568	19217384736	202	882Drone	WGS	unspecified	GENOMIC	PAIRED	ILLUMINA	Illumina HiSeq 2500	PRJNA306271	SAMN04348933	AM-D-882-6	Drone	colony 882	2013	USA: Fallbrook, CA	abdomen	NA	NA	NA	NA	NA	NA	NA	NA	abdomen		NA	NA	USA	Positive	0	0	0	10	6637	65	2
SRR6236970	33698414	10109524200	300	SOL1-TTAGGC	WGS	size fractionation	GENOMIC	PAIRED	ILLUMINA	Illumina HiSeq 2500	PRJNA311274	SAMN07956303	SOL1	SOL1	Hive	2014	France: Sollies	Thorax	Puape/Larvae	NA	male	NA	NA	NA	larval/pupal	male	thorax		NA	NA	France	Positive	0	0	0	12	8151	273	0
SRR10548557	62352341	18705702300	300	Larv02	WGS	unspecified	GENOMIC	PAIRED	ILLUMINA	Illumina NovaSeq 6000	PRJNA592273	SAMN13419552	Offspring_#02	RSA2017-286_2	SC 5	2/11/2018	South Africa: Stellenbosch	larva	NA	NA	female	NA	NA	NA	larval/pupal	female	NA		NA	NA	South Africa	Positive	0	0	0	12	8172	0	319
SRR11038102	30610196	9244279192	302	Sample 38	WGS	RANDOM PCR	GENOMIC	PAIRED	ILLUMINA	Illumina HiSeq 4000	PRJNA605407	SAMN14056756	MNHyg2	Honey Bee	Colony	2018-03	USA:Louisiana	Whole body	NA	NA	female	NA	NA	NA	NA	female	whole body		NA	NA	USA	Positive	0	0	0	15	10407	92	17
SRR11471529	9735470	2920641000	300	AR1303	WGS	RANDOM	GENOMIC	PAIRED	ILLUMINA	Illumina HiSeq 4000	PRJNA622776	SAMN14526601	AR1303	NA	foraging on vegetation	1/16/2018	Argentina	wing muscle	adult	32.7092 S 60.7478 W	female	NA	NA	NA	adult	female	thorax		-32.7092	-60.7478	Argentina	Positive	0	0	0	12	8435	25	23
SRR11038172	29937557	9041142214	302	Sample 18	WGS	RANDOM PCR	GENOMIC	PAIRED	ILLUMINA	Illumina HiSeq 4000	PRJNA605407	SAMN14056736	Italian1_6	Honey Bee	Colony	2018-03	USA:Louisiana	Whole body	NA	NA	female	NA	NA	NA	NA	female	whole body		NA	NA	USA	Positive	0	0	0	14	9877	150	59
SRR15173485	12638658	3791597400	300	YC8_CGTACG_L002	WGS	size fractionation	GENOMIC	PAIRED	ILLUMINA	Illumina HiSeq 2500	PRJNA311274	SAMN20257416	YC8	YC8	Hive	2014	France	thorax	NA	NA	male	NA	NA	NA	NA	male	thorax		NA	NA	France	Positive	0	0	0	13	9348	0	0
SRR11471565	6081664	1824499200	300	AR0910	WGS	RANDOM	GENOMIC	PAIRED	ILLUMINA	Illumina HiSeq 4000	PRJNA622776	SAMN14526568	AR0910	NA	foraging on vegetation	1/22/2018	Argentina	wing muscle	adult	34.1942 S 60.7271 W	female	NA	NA	NA	adult	female	thorax		-34.1942	-60.7271	Argentina	Positive	0	0	0	12	8703	36	2
SRR15173577	37642005	11292601500	300	POR1_GTCCGC_merged	WGS	size fractionation	GENOMIC	PAIRED	ILLUMINA	Illumina HiSeq 2500	PRJNA311274	SAMN20257333	POR1	POR1	Hive	2014	France: Porquerolles	thorax	NA	NA	male	NA	NA	NA	NA	male	thorax		NA	NA	France	Positive	0	0	0	11	8051	339	0
SRR10572006	58323975	17497192500	300	14_P2_G11	WGS	unspecified	GENOMIC	PAIRED	ILLUMINA	Illumina NovaSeq 6000	PRJNA592197	SAMN13415891	Backcross_offspring#14	RSA2017_248_7	RSA2017_248	1/29/2018	South Africa: Stellenbosch	larva	NA	NA	female	NA	NA	NA	larval/pupal	female	NA		NA	NA	South Africa	Positive	0	0	0	12	8827	100	222
SRR3037353	89289869	18036553538	202	888Drone	WGS	unspecified	GENOMIC	PAIRED	ILLUMINA	Illumina HiSeq 2500	PRJNA306271	SAMN04348931	AM-D-888-4	Drone	colony 888	2013	USA: Fallbrook, CA	abdomen	NA	NA	NA	NA	NA	NA	NA	NA	abdomen		NA	NA	USA	Positive	0	0	0	10	7376	82	0
SRR11471479	5029490	1508847000	300	AR2009	WGS	RANDOM	GENOMIC	PAIRED	ILLUMINA	Illumina HiSeq 4000	PRJNA622776	SAMN14526646	AR2009	NA	foraging on vegetation	1/18/2018	Argentina	wing muscle	adult	30.6711 S 59.9772 W	female	NA	NA	NA	adult	female	thorax		-30.6711	-59.9772	Argentina	Positive	0	0	0	11	8153	29	2
SRR10572003	63200904	18960271200	300	17_P3_B8	WGS	unspecified	GENOMIC	PAIRED	ILLUMINA	Illumina NovaSeq 6000	PRJNA592197	SAMN13415894	Backcross_offspring#17	RSA2017_248_10	RSA2017_248	1/29/2018	South Africa: Stellenbosch	larva	NA	NA	female	NA	NA	NA	larval/pupal	female	NA		NA	NA	South Africa	Positive	0	0	0	12	9076	134	241
SRR15173532	35581744	10674523200	300	SOL6_ACTTGA_merged	WGS	size fractionation	GENOMIC	PAIRED	ILLUMINA	Illumina HiSeq 2500	PRJNA311274	SAMN20257373	SOL6	SOL6	Hive	2014	France: Sollies	thorax	NA	NA	male	NA	NA	NA	NA	male	thorax		NA	NA	France	Positive	0	0	0	10	7653	165	0
SRR12726907	54594609	13648652250	250	POOL_18_CGATGT_L006_	WGS	RANDOM	GENOMIC	PAIRED	ILLUMINA	Illumina HiSeq 2500	PRJNA666033	SAMN16277090	POOL_18	NA	hive	2015	Turkey	head	NA	NA	female	NA	NA	NA	NA	female	head		NA	NA	Turkey	Positive	0	0	0	10	7683	147	0
SRR11471444	10851525	3255457500	300	AR2603	WGS	RANDOM	GENOMIC	PAIRED	ILLUMINA	Illumina HiSeq 4000	PRJNA622776	SAMN14526678	AR2603	NA	at entrance of a feral colony in a utility pole	1/19/2018	Argentina	wing muscle	adult	29.1386 S 59.6386 W	female	NA	NA	NA	adult	female	thorax		-29.1386	-59.6386	Argentina	Positive	0	0	0	10	7792	12	38
SRR10571992	52321387	15696416100	300	27_P4_A2	WGS	unspecified	GENOMIC	PAIRED	ILLUMINA	Illumina NovaSeq 6000	PRJNA592197	SAMN13415904	Backcross_offspring#27	RSA2017_248_20	RSA2017_248	1/29/2018	South Africa: Stellenbosch	larva	NA	NA	female	NA	NA	NA	larval/pupal	female	NA		NA	NA	South Africa	Positive	0	0	0	12	9420	117	264
SRR14703849	79479378	24002772156	302	Acauca_819	WGS	RANDOM	GENOMIC	PAIRED	ILLUMINA	HiSeq X Five	PRJNA729035	SAMN19109567	Acauca_819	Apis_mellifera_Acauca_819	Not Applicable	1995	Turkey: Ardahan	Previously Extracted DNA	Adult	NA	female	NA	NA	NA	adult	female	NA		NA	NA	Turkey	Positive	0	0	0	10	7869	137	0
SRR11038146	26949169	8138649038	302	Sample 70	WGS	RANDOM PCR	GENOMIC	PAIRED	ILLUMINA	Illumina HiSeq 4000	PRJNA605407	SAMN14056788	Russian10	Honey Bee	Colony	2018-03	USA:Louisiana	Whole body	NA	NA	female	NA	NA	NA	NA	female	whole body		NA	NA	USA	Positive	0	0	0	12	9609	145	0
SRR11038173	32715699	9880141098	302	Sample 17	WGS	RANDOM PCR	GENOMIC	PAIRED	ILLUMINA	Illumina HiSeq 4000	PRJNA605407	SAMN14056735	Italian1_5	Honey Bee	Colony	2018-03	USA:Louisiana	Whole body	NA	NA	female	NA	NA	NA	NA	female	whole body		NA	NA	USA	Positive	0	0	0	12	9695	192	3
SRR6236948	9950234	2985070200	300	ITA11A-GGCTAC-L004	WGS	size fractionation	GENOMIC	PAIRED	ILLUMINA	Illumina HiSeq 2500	PRJNA311274	SAMN07956273	ITA11A	ITA11A	Hive	2014	Italy	Thorax	Puape/Larvae	NA	male	NA	NA	NA	larval/pupal	male	thorax		NA	NA	Italy	Positive	0	0	0	10	8177	216	0
SRR15173444	16070169	4821050700	300	NCA5_TTAGGC_L003	WGS	size fractionation	GENOMIC	PAIRED	ILLUMINA	Illumina HiSeq 2500	PRJNA311274	SAMN20257453	NCA5	NCA5	Hive	2014	New Caledonia	thorax	NA	NA	male	NA	NA	NA	NA	male	thorax		NA	NA	New Caledonia	Positive	0	0	0	10	8183	121	0
SRR7442300	141656447	42437358486	299	riz-lr-jll	WGS	PCR	GENOMIC	PAIRED	ILLUMINA	HiSeq X Ten	PRJNA478213	SAMN09501436	CBS_Apismelliferaligustica_D945-R03	NA	NA	NA	NA	thorax	worker bee 1	NA	female	NA	NA	NA	adult	female	thorax		NA	NA	NA	Positive	0	0	0	10	8272	154	0
SRR15173418	29790145	8937043500	300	BS16-197-M3_CGCTCATT-CCTATCCT-BHCFFJDSXX_L003	WGS	size fractionation	GENOMIC	PAIRED	ILLUMINA	Illumina NovaSeq 6000	PRJNA311274	SAMN20257476	BS16-197-M3	BS16-197-M3	Hive	2014	France: Vaucluse	thorax	NA	NA	male	NA	NA	NA	NA	male	thorax		NA	NA	France	Positive	0	0	0	10	8291	221	0
SRR11471514	7550602	2265180600	300	AR1413	WGS	RANDOM	GENOMIC	PAIRED	ILLUMINA	Illumina HiSeq 4000	PRJNA622776	SAMN14526614	AR1413	NA	foraging on vegetation	1/16/2018	Argentina	wing muscle	adult	32.2333 S 60.985 W	female	NA	NA	NA	adult	female	thorax		-32.2333	-60.985	Argentina	Positive	0	0	0	13	10886	22	7
SRR11471389	5796901	1739070300	300	CA0401	WGS	RANDOM	GENOMIC	PAIRED	ILLUMINA	Illumina HiSeq 4000	PRJNA622776	SAMN14526727	CA0401	NA	foraging on vegetation	6/18/2018	USA: California	wing muscle	adult	33.8065 N 117.5054 W	female	NA	NA	NA	adult	female	thorax		33.8065	-117.505	USA	Positive	0	0	0	10	8495	19	17
SRR11471598	5824775	1747432500	300	CA1315	WGS	RANDOM	GENOMIC	PAIRED	ILLUMINA	Illumina HiSeq 4000	PRJNA622776	SAMN14526788	CA1315	NA	foraging on vegetation	6/26/2018	USA: California	wing muscle	adult	36.2269 N 121.0639 W	female	NA	NA	NA	adult	female	thorax		36.2269	-121.064	USA	Positive	0	0	0	10	8592	44	0
SRR15173529	35451723	10635516900	300	SOL9_GGCTAC_merged	WGS	size fractionation	GENOMIC	PAIRED	ILLUMINA	Illumina HiSeq 2500	PRJNA311274	SAMN20257376	SOL9	SOL9	Hive	2014	France: Sollies	thorax	NA	NA	male	NA	NA	NA	NA	male	thorax		NA	NA	France	Positive	0	0	0	10	8633	216	0
SRR11471399	5762886	1728865800	300	CA0303	WGS	RANDOM	GENOMIC	PAIRED	ILLUMINA	Illumina HiSeq 4000	PRJNA622776	SAMN14526719	CA0303	NA	foraging on vegetation	6/17/2018	USA: California	wing muscle	adult	33.4503 N 117.1306 W	female	NA	NA	NA	adult	female	thorax		33.4503	-117.131	USA	Positive	0	0	0	10	8824	11	31
SRR11038139	27957223	8443081346	302	Sample 76	WGS	RANDOM PCR	GENOMIC	PAIRED	ILLUMINA	Illumina HiSeq 4000	PRJNA605407	SAMN14056794	Italian3_4	Honey Bee	Colony	2018-03	USA:Louisiana	Whole body	NA	NA	female	NA	NA	NA	NA	female	whole body		NA	NA	USA	Positive	0	0	0	11	10067	143	0
SRR10572001	63665415	19099624500	300	19_P3_D4	WGS	unspecified	GENOMIC	PAIRED	ILLUMINA	Illumina NovaSeq 6000	PRJNA592197	SAMN13415896	Backcross_offspring#19	RSA2017_248_12	RSA2017_248	1/29/2018	South Africa: Stellenbosch	larva	NA	NA	female	NA	NA	NA	larval/pupal	female	NA		NA	NA	South Africa	Positive	0	0	0	10	9161	144	223
SRR11038144	27931377	8435275854	302	Sample 71	WGS	RANDOM PCR	GENOMIC	PAIRED	ILLUMINA	Illumina HiSeq 4000	PRJNA605407	SAMN14056789	Russian11	Honey Bee	Colony	2018-03	USA:Louisiana	Whole body	NA	NA	female	NA	NA	NA	NA	female	whole body		NA	NA	USA	Positive	0	0	0	10	10138	159	0
SRR5115505	9674653	2438012556	252	P1862_106_MKF_7	WGS	RANDOM	GENOMIC	PAIRED	ILLUMINA	Illumina HiSeq 2500	PRJNA357367	SAMN06142956	MKF 7	Apis mellifera monticola	forest colonies	9/1/2009	Kenya: Mt Kenya forest highland	thorax	adult	0.19688 S 37.48215 E	female	NA	NA	NA	adult	female	thorax		-0.19688	37.4821	Kenya	Negative	0	0	0	0	0	20	108
SRR5115497	11152472	2810422944	252	P1862_107_MKF_11	WGS	RANDOM	GENOMIC	PAIRED	ILLUMINA	Illumina HiSeq 2500	PRJNA357367	SAMN06142957	MKF 11	Apis mellifera monticola	forest colonies	9/1/2009	Kenya: Mt Kenya forest highland	thorax	adult	0.19880 S 37.48618 E	female	NA	NA	NA	adult	female	thorax		-0.1988	37.4862	Kenya	Negative	0	0	0	0	0	0	234
SRR5115495	16504577	4159153404	252	P1862_109_MKF_108	WGS	RANDOM	GENOMIC	PAIRED	ILLUMINA	Illumina HiSeq 2500	PRJNA357367	SAMN06142959	MKF 108	Apis mellifera monticola	forest colonies	9/1/2009	Kenya: Mt Kenya forest highland	thorax	adult	0.20698 S 37.49225 E	female	NA	NA	NA	adult	female	thorax		-0.20698	37.4922	Kenya	Negative	0	0	0	0	0	28	147
SRR5115514	8649872	2179767744	252	P1862_110_MKF_113	WGS	RANDOM	GENOMIC	PAIRED	ILLUMINA	Illumina HiSeq 2500	PRJNA357367	SAMN06142960	MKF 113	Apis mellifera monticola	forest colonies	9/1/2009	Kenya: Mt Kenya forest highland	thorax	adult	0.21928 S 37.51155 E	female	NA	NA	NA	adult	female	thorax		-0.21928	37.5115	Kenya	Negative	0	0	0	0	0	53	78
SRR5115488	9136348	2302359696	252	P1862_104_MKF_5	WGS	RANDOM	GENOMIC	PAIRED	ILLUMINA	Illumina HiSeq 2500	PRJNA357367	SAMN06142954	MKF 5	Apis mellifera monticola	forest colonies	9/1/2009	Kenya: Mt Kenya forest highland	thorax	adult	0.21957 S 37.51238 E	female	NA	NA	NA	adult	female	thorax		-0.21957	37.5124	Kenya	Negative	0	0	0	0	0	52	99
SRR5115510	9850328	2482282656	252	P1862_112_MKS_16	WGS	RANDOM	GENOMIC	PAIRED	ILLUMINA	Illumina HiSeq 2500	PRJNA357367	SAMN06142943	MKS 16	Apis mellifera scutellata	savannah colonies	9/1/2009	Kenya: Mt Kenya savannah lowland	thorax	adult	0.23427 S 37.73815 E	female	NA	NA	NA	adult	female	thorax		-0.23427	37.7381	Kenya	Negative	0	0	0	0	0	59	97
SRR5115508	10906708	2748490416	252	P1862_111_MKS_14	WGS	RANDOM	GENOMIC	PAIRED	ILLUMINA	Illumina HiSeq 2500	PRJNA357367	SAMN06142942	MKS 14	Apis mellifera scutellata	savannah colonies	9/1/2009	Kenya: Mt Kenya savannah lowland	thorax	adult	0.23553 S 37.74567 E	female	NA	NA	NA	adult	female	thorax		-0.23553	37.7457	Kenya	Negative	0	0	0	0	0	3	147
SRR5115518	18555037	4675869324	252	P1862_116_MKS_66	WGS	RANDOM	GENOMIC	PAIRED	ILLUMINA	Illumina HiSeq 2500	PRJNA357367	SAMN06142947	MKS 66	Apis mellifera scutellata	savannah colonies	9/1/2009	Kenya: Mt Kenya savannah lowland	thorax	adult	0.24003 S 37.77653 E	female	NA	NA	NA	adult	female	thorax		-0.24003	37.7765	Kenya	Negative	0	0	0	0	0	2	98
SRR5115509	11429157	2880147564	252	P1862_119_MKS_70	WGS	RANDOM	GENOMIC	PAIRED	ILLUMINA	Illumina HiSeq 2500	PRJNA357367	SAMN06142950	MKS 70	Apis mellifera scutellata	savannah colonies	9/1/2009	Kenya: Mt Kenya savannah lowland	thorax	adult	0.24118 S 37.73608 E	female	NA	NA	NA	adult	female	thorax		-0.24118	37.7361	Kenya	Negative	0	0	0	0	0	9	243
SRR5115512	10022465	2525661180	252	P1862_118_MKS_68	WGS	RANDOM	GENOMIC	PAIRED	ILLUMINA	Illumina HiSeq 2500	PRJNA357367	SAMN06142949	MKS 68	Apis mellifera scutellata	savannah colonies	9/1/2009	Kenya: Mt Kenya savannah lowland	thorax	adult	0.24240 S 37.73665 E	female	NA	NA	NA	adult	female	thorax		-0.2424	37.7366	Kenya	Negative	0	0	0	0	0	29	111
SRR5115498	14249257	3590812764	252	P1862_114_MKS_55	WGS	RANDOM	GENOMIC	PAIRED	ILLUMINA	Illumina HiSeq 2500	PRJNA357367	SAMN06142945	MKS 55	Apis mellifera scutellata	savannah colonies	9/1/2009	Kenya: Mt Kenya savannah lowland	thorax	adult	0.24415 S 37.74720 E	female	NA	NA	NA	adult	female	thorax		-0.24415	37.7472	Kenya	Negative	0	0	0	0	0	31	57
SRR5115494	12450993	3137650236	252	P1862_115_MKS_58	WGS	RANDOM	GENOMIC	PAIRED	ILLUMINA	Illumina HiSeq 2500	PRJNA357367	SAMN06142946	MKS 58	Apis mellifera scutellata	savannah colonies	9/1/2009	Kenya: Mt Kenya savannah lowland	thorax	adult	0.24740 S 37.74923 E	female	NA	NA	NA	adult	female	thorax		-0.2474	37.7492	Kenya	Negative	0	0	0	0	0	0	207
SRR5115502	10549771	2658542292	252	P1862_113_MKS_54	WGS	RANDOM	GENOMIC	PAIRED	ILLUMINA	Illumina HiSeq 2500	PRJNA357367	SAMN06142944	MKS 54	Apis mellifera scutellata	savannah colonies	9/1/2009	Kenya: Mt Kenya savannah lowland	thorax	adult	0.24753 S 37.74918 E	female	NA	NA	NA	adult	female	thorax		-0.24753	37.7492	Kenya	Negative	0	0	0	0	0	0	146
SRR14703915	59511592	17972500784	302	Ascu_B4	WGS	RANDOM	GENOMIC	PAIRED	ILLUMINA	HiSeq X Five	PRJNA729035	SAMN19109627	Ascu_B4	Apis_mellifera_Ascu_B4	Not Applicable	2010	Kenya: Ichiara	1/2 Thorax	Adult	0.467300 N 37.717283 E	female	NA	NA	NA	adult	female	thorax		0.4673	37.7173	Kenya	Negative	0	0	0	0	0	23	149
SRR14703914	59046605	17832074710	302	Ascu_B5	WGS	RANDOM	GENOMIC	PAIRED	ILLUMINA	HiSeq X Five	PRJNA729035	SAMN19109628	Ascu_B5	Apis_mellifera_Ascu_B5	Not Applicable	2010	Kenya: Ichiara	1/2 Thorax	Adult	0.467300 N 37.717283 E	female	NA	NA	NA	adult	female	thorax		0.4673	37.7173	Kenya	Negative	0	0	0	0	0	27	105
SRR5115524	12246406	3086094312	252	P1862_129_MF_90	WGS	RANDOM	GENOMIC	PAIRED	ILLUMINA	Illumina HiSeq 2500	PRJNA357367	SAMN06142941	MF 90	Apis mellifera monticola	forest colonies	9/1/2009	Kenya: Mau forest highland	thorax	adult	0.49445 S 35.88282 E	female	NA	NA	NA	adult	female	thorax		-0.49445	35.8828	Kenya	Negative	0	0	0	0	0	5	194
SRR5115507	14596880	3678413760	252	P1862_123_MF_79	WGS	RANDOM	GENOMIC	PAIRED	ILLUMINA	Illumina HiSeq 2500	PRJNA357367	SAMN06142935	MF 79	Apis mellifera monticola	forest colonies	9/1/2009	Kenya: Mau forest highland	thorax	adult	0.49877 S 35.88600 E	female	NA	NA	NA	adult	female	thorax		-0.49877	35.886	Kenya	Negative	0	0	0	0	0	106	90
SRR5115496	15881647	4002175044	252	P1862_128_MF_89	WGS	RANDOM	GENOMIC	PAIRED	ILLUMINA	Illumina HiSeq 2500	PRJNA357367	SAMN06142940	MF 89	Apis mellifera monticola	forest colonies	9/1/2009	Kenya: Mau forest highland	thorax	adult	0.49905 S 35.87735 E	female	NA	NA	NA	adult	female	thorax		-0.49905	35.8773	Kenya	Negative	0	0	0	0	0	47	83
SRR14703790	67078659	20257755018	302	Amont_1	WGS	RANDOM	GENOMIC	PAIRED	ILLUMINA	HiSeq X Five	PRJNA729035	SAMN19109656	Amont_1	Apis_mellifera_Amont_1	Not Applicable	2010	Kenya: Marchorwe	1/2 Thorax	Adult	0.500832 S 36.545570 E	female	NA	NA	NA	adult	female	thorax		-0.500832	36.5456	Kenya	Negative	0	0	0	0	0	103	136
SRR14703927	63818360	19273144720	302	Ascu_A1	WGS	RANDOM	GENOMIC	PAIRED	ILLUMINA	HiSeq X Five	PRJNA729035	SAMN19109658	Ascu_A1	Apis_mellifera_Ascu_A1	Not Applicable	2010	Kenya: Marchorwe	1/2 Thorax	Adult	0.500832 S 36.545570 E	female	NA	NA	NA	adult	female	thorax		-0.500832	36.5456	Kenya	Negative	0	0	0	0	0	0	185
SRR14703789	62475767	18867681634	302	Amont_2	WGS	RANDOM	GENOMIC	PAIRED	ILLUMINA	HiSeq X Five	PRJNA729035	SAMN19109657	Amont_2	Apis_mellifera_Amont_2	Not Applicable	2010	Kenya: Marchorwe	1/2 Thorax	Adult	0.500832 S 36.545570 E	female	NA	NA	NA	adult	female	thorax		-0.500832	36.5456	Kenya	Negative	0	0	0	0	0	42	201
SRR14703916	61219050	18488153100	302	Ascu_B1	WGS	RANDOM	GENOMIC	PAIRED	ILLUMINA	HiSeq X Five	PRJNA729035	SAMN19109660	Ascu_B1	Apis_mellifera_Ascu_B1	Not Applicable	2010	Kenya: Marchorwe	1/2 Thorax	Adult	0.500832 S 36.545570 E	female	NA	NA	NA	adult	female	thorax		-0.500832	36.5456	Kenya	Negative	0	0	0	0	0	69	130
SRR14703924	58137744	17557598688	302	Ascu_A2	WGS	RANDOM	GENOMIC	PAIRED	ILLUMINA	HiSeq X Five	PRJNA729035	SAMN19109659	Ascu_A2	Apis_mellifera_Ascu_A2	Not Applicable	2010	Kenya: Marchorwe	1/2 Thorax	Adult	0.500832 S 36.545570 E	female	NA	NA	NA	adult	female	thorax		-0.500832	36.5456	Kenya	Negative	0	0	0	0	0	6	147
SRR5115525	12107535	3051098820	252	P1862_124_MF_81	WGS	RANDOM	GENOMIC	PAIRED	ILLUMINA	Illumina HiSeq 2500	PRJNA357367	SAMN06142936	MF 81	Apis mellifera monticola	forest colonies	9/1/2009	Kenya: Mau forest highland	thorax	adult	0.50145 S 35.88152 E	female	NA	NA	NA	adult	female	thorax		-0.50145	35.8815	Kenya	Negative	0	0	0	0	0	47	210
SRR5115491	11564360	2914218720	252	P1862_120_MF_71	WGS	RANDOM	GENOMIC	PAIRED	ILLUMINA	Illumina HiSeq 2500	PRJNA357367	SAMN06142932	MF 71	Apis mellifera monticola	forest colonies	9/1/2009	Kenya: Mau forest highland	thorax	adult	0.50300 S 35.88547 E	female	NA	NA	NA	adult	female	thorax		-0.503	35.8855	Kenya	Negative	0	0	0	0	0	17	110
SRR5115499	10292729	2593767708	252	P1862_125_MF_82	WGS	RANDOM	GENOMIC	PAIRED	ILLUMINA	Illumina HiSeq 2500	PRJNA357367	SAMN06142937	MF 82	Apis mellifera monticola	forest colonies	9/1/2009	Kenya: Mau forest highland	thorax	adult	0.50402 S 35.88445 E	female	NA	NA	NA	adult	female	thorax		-0.50402	35.8845	Kenya	Negative	0	0	0	0	0	0	133
SRR5115493	11997852	3023458704	252	P1862_127_MF_87	WGS	RANDOM	GENOMIC	PAIRED	ILLUMINA	Illumina HiSeq 2500	PRJNA357367	SAMN06142939	MF 87	Apis mellifera monticola	forest colonies	9/1/2009	Kenya: Mau forest highland	thorax	adult	0.50595 S 35.87712 E	female	NA	NA	NA	adult	female	thorax		-0.50595	35.8771	Kenya	Negative	0	0	0	0	0	17	128
SRR5115503	12426180	3131397360	252	P1862_121_MF_72	WGS	RANDOM	GENOMIC	PAIRED	ILLUMINA	Illumina HiSeq 2500	PRJNA357367	SAMN06142933	MF 72	Apis mellifera monticola	forest colonies	9/1/2009	Kenya: Mau forest highland	thorax	adult	0.50605 S 35.88450 E	female	NA	NA	NA	adult	female	thorax		-0.50605	35.8845	Kenya	Negative	0	0	0	0	0	0	130
SRR5115517	13377119	3371033988	252	P1862_122_MF_74	WGS	RANDOM	GENOMIC	PAIRED	ILLUMINA	Illumina HiSeq 2500	PRJNA357367	SAMN06142934	MF 74	Apis mellifera monticola	forest colonies	9/1/2009	Kenya: Mau forest highland	thorax	adult	0.50618 S 35.88663 E	female	NA	NA	NA	adult	female	thorax		-0.50618	35.8866	Kenya	Negative	0	0	0	0	0	0	123
SRR5115492	10558569	2660759388	252	P1862_126_MF_85	WGS	RANDOM	GENOMIC	PAIRED	ILLUMINA	Illumina HiSeq 2500	PRJNA357367	SAMN06142938	MF 85	Apis mellifera monticola	forest colonies	9/1/2009	Kenya: Mau forest highland	thorax	adult	0.51213 S 35.88048 E	female	NA	NA	NA	adult	female	thorax		-0.51213	35.8805	Kenya	Negative	0	0	0	0	0	64	87
SRR5115522	7309334	1841952168	252	P1862_132_MS_94	WGS	RANDOM	GENOMIC	PAIRED	ILLUMINA	Illumina HiSeq 2500	PRJNA357367	SAMN06142924	MS 94	Apis mellifera scutellata	savannah colonies	9/1/2009	Kenya: Mau savannah lowland	thorax	adult	0.51765 S 36.09663 E	female	NA	NA	NA	adult	female	thorax		-0.51765	36.0966	Kenya	Negative	0	0	0	0	0	65	56
SRR5115515	15072127	3798176004	252	P1862_133_MS_95	WGS	RANDOM	GENOMIC	PAIRED	ILLUMINA	Illumina HiSeq 2500	PRJNA357367	SAMN06142925	MS 95	Apis mellifera scutellata	savannah colonies	9/1/2009	Kenya: Mau savannah lowland	thorax	adult	0.51817 S 36.09700 E	female	NA	NA	NA	adult	female	thorax		-0.51817	36.097	Kenya	Negative	0	0	0	0	0	23	115
SRR5115489	16737627	4217882004	252	P1862_131_MS_92	WGS	RANDOM	GENOMIC	PAIRED	ILLUMINA	Illumina HiSeq 2500	PRJNA357367	SAMN06142923	MS 92	Apis mellifera scutellata	savannah colonies	9/1/2009	Kenya: Mau savannah lowland	thorax	adult	0.52118 S 36.08995 E	female	NA	NA	NA	adult	female	thorax		-0.52118	36.09	Kenya	Negative	0	0	0	0	0	126	26
SRR5115527	10849514	2734077528	252	P1862_134_MS_97	WGS	RANDOM	GENOMIC	PAIRED	ILLUMINA	Illumina HiSeq 2500	PRJNA357367	SAMN06142926	MS 97	Apis mellifera scutellata	savannah colonies	9/1/2009	Kenya: Mau savannah lowland	thorax	adult	0.52128 S 36.09048 E	female	NA	NA	NA	adult	female	thorax		-0.52128	36.0905	Kenya	Negative	0	0	0	0	0	45	40
SRR14703921	64590164	19506229528	302	Ascu_A5	WGS	RANDOM	GENOMIC	PAIRED	ILLUMINA	HiSeq X Five	PRJNA729035	SAMN19109643	Ascu_A5	Apis_mellifera_Ascu_A5	Not Applicable	2010	Kenya: Malewa	1/2 Thorax	Adult	0.525040 S 36.403282 E	female	NA	NA	NA	adult	female	thorax		-0.52504	36.4033	Kenya	Negative	0	0	0	0	0	0	135
SRR14703922	58473485	17658992470	302	Ascu_A4	WGS	RANDOM	GENOMIC	PAIRED	ILLUMINA	HiSeq X Five	PRJNA729035	SAMN19109642	Ascu_A4	Apis_mellifera_Ascu_A4	Not Applicable	2010	Kenya: Malewa	1/2 Thorax	Adult	0.525040 S 36.403282 E	female	NA	NA	NA	adult	female	thorax		-0.52504	36.4033	Kenya	Negative	0	0	0	0	0	61	101
SRR5115501	11973593	3017345436	252	P1862_139_MS_107	WGS	RANDOM	GENOMIC	PAIRED	ILLUMINA	Illumina HiSeq 2500	PRJNA357367	SAMN06142931	MS 107	Apis mellifera scutellata	savannah colonies	9/1/2009	Kenya: Mau savannah lowland	thorax	adult	0.52607 S 36.07708 E	female	NA	NA	NA	adult	female	thorax		-0.52607	36.0771	Kenya	Negative	0	0	0	0	0	38	98
SRR5115521	13843937	3488672124	252	P1862_138_MS_104	WGS	RANDOM	GENOMIC	PAIRED	ILLUMINA	Illumina HiSeq 2500	PRJNA357367	SAMN06142930	MS 104	Apis mellifera scutellata	savannah colonies	9/1/2009	Kenya: Mau savannah lowland	thorax	adult	0.53327 S 36.07513 E	female	NA	NA	NA	adult	female	thorax		-0.53327	36.0751	Kenya	Negative	0	0	0	0	0	32	99
SRR5115520	11769410	2965891320	252	P1862_130_MS_91	WGS	RANDOM	GENOMIC	PAIRED	ILLUMINA	Illumina HiSeq 2500	PRJNA357367	SAMN06142922	MS 91	Apis mellifera scutellata	savannah colonies	9/1/2009	Kenya: Mau savannah lowland	thorax	adult	0.53540 S 36.10112 E	female	NA	NA	NA	adult	female	thorax		-0.5354	36.1011	Kenya	Negative	0	0	0	0	0	61	83
SRR5115506	14421249	3634154748	252	P1862_137_MS_101	WGS	RANDOM	GENOMIC	PAIRED	ILLUMINA	Illumina HiSeq 2500	PRJNA357367	SAMN06142929	MS 101	Apis mellifera scutellata	savannah colonies	9/1/2009	Kenya: Mau savannah lowland	thorax	adult	0.54068 S 36.09582 E	female	NA	NA	NA	adult	female	thorax		-0.54068	36.0958	Kenya	Negative	0	0	0	0	0	6	160
SRR5115516	11585352	2919508704	252	P1862_135_MS_99	WGS	RANDOM	GENOMIC	PAIRED	ILLUMINA	Illumina HiSeq 2500	PRJNA357367	SAMN06142927	MS 99	Apis mellifera scutellata	savannah colonies	9/1/2009	Kenya: Mau savannah lowland	thorax	adult	0.54127 S 36.09573 E	female	NA	NA	NA	adult	female	thorax		-0.54127	36.0957	Kenya	Negative	0	0	0	0	0	73	88
SRR5115490	17077431	4303512612	252	P1862_136_MS_100	WGS	RANDOM	GENOMIC	PAIRED	ILLUMINA	Illumina HiSeq 2500	PRJNA357367	SAMN06142928	MS 100	Apis mellifera scutellata	savannah colonies	9/1/2009	Kenya: Mau savannah lowland	thorax	adult	0.54250 S 36.09502 E	female	NA	NA	NA	adult	female	thorax		-0.5425	36.095	Kenya	Negative	0	0	0	0	0	0	119
SRR14703787	62222323	18791141546	302	Amont_4	WGS	RANDOM	GENOMIC	PAIRED	ILLUMINA	HiSeq X Five	PRJNA729035	SAMN19109675	Amont_4	Apis_mellifera_Amont_4	Not Applicable	2010	Kenya: Moorland at Mt. Elgon	1/2 Thorax	Adult	0.954100 N 34.604767 E	female	NA	NA	NA	adult	female	thorax		0.9541	34.6048	Kenya	Negative	0	0	0	0	0	22	237
SRR14703926	61005526	18423668852	302	Ascu_A10	WGS	RANDOM	GENOMIC	PAIRED	ILLUMINA	HiSeq X Five	PRJNA729035	SAMN19109678	Ascu_A10	Apis_mellifera_Ascu_A10	Not Applicable	2010	Kenya: Moorland at Mt. Elgon	1/2 Thorax	Adult	0.954100 N 34.604767 E	female	NA	NA	NA	adult	female	thorax		0.9541	34.6048	Kenya	Negative	0	0	0	0	0	157	54
SRR14703786	59272966	17900435732	302	Amont_5	WGS	RANDOM	GENOMIC	PAIRED	ILLUMINA	HiSeq X Five	PRJNA729035	SAMN19109676	Amont_5	Apis_mellifera_Amont_5	Not Applicable	2010	Kenya: Moorland at Mt. Elgon	1/2 Thorax	Adult	0.954100 N 34.604767 E	female	NA	NA	NA	adult	female	thorax		0.9541	34.6048	Kenya	Negative	0	0	0	0	0	43	140
SRR14703784	57182755	17269192010	302	Amont_6	WGS	RANDOM	GENOMIC	PAIRED	ILLUMINA	HiSeq X Five	PRJNA729035	SAMN19109677	Amont_6	Apis_mellifera_Amont_6	Not Applicable	2010	Kenya: Moorland at Mt. Elgon	1/2 Thorax	Adult	0.954100 N 34.604767 E	female	NA	NA	NA	adult	female	thorax		0.9541	34.6048	Kenya	Negative	0	0	0	0	0	86	93
SRR14703788	56802955	17154492410	302	Amont_3	WGS	RANDOM	GENOMIC	PAIRED	ILLUMINA	HiSeq X Five	PRJNA729035	SAMN19109674	Amont_3	Apis_mellifera_Amont_3	Not Applicable	2010	Kenya: Moorland at Mt. Elgon	1/2 Thorax	Adult	0.954100 N 34.604767 E	female	NA	NA	NA	adult	female	thorax		0.9541	34.6048	Kenya	Negative	0	0	0	0	0	0	127
SRR14703925	56499801	17062939902	302	Ascu_A11	WGS	RANDOM	GENOMIC	PAIRED	ILLUMINA	HiSeq X Five	PRJNA729035	SAMN19109679	Ascu_A11	Apis_mellifera_Ascu_A11	Not Applicable	2010	Kenya: Moorland at Mt. Elgon	1/2 Thorax	Adult	0.954100 N 34.604767 E	female	NA	NA	NA	adult	female	thorax		0.9541	34.6048	Kenya	Negative	0	0	0	0	0	35	130
SRR14703809	66761799	20162063298	302	Alamark972	WGS	RANDOM	GENOMIC	PAIRED	ILLUMINA	HiSeq X Five	PRJNA729035	SAMN19109579	Alamark972	Apis_mellifera_Alamark972	Not Applicable	1993	Egypt: Assiut	Previously Extracted DNA	Adult	27.180744 N 31.183397 E	female	NA	NA	NA	adult	female	NA		27.1807	31.1834	Egypt	Negative	0	0	0	0	0	0	167
SRR14703810	66192788	19990221976	302	Alamark971	WGS	RANDOM	GENOMIC	PAIRED	ILLUMINA	HiSeq X Five	PRJNA729035	SAMN19109578	Alamark971	Apis_mellifera_Alamark971	Not Applicable	1993	Egypt: Assiut	Previously Extracted DNA	Adult	27.180744 N 31.183397 E	female	NA	NA	NA	adult	female	NA		27.1807	31.1834	Egypt	Negative	0	0	0	0	0	0	150
SRR14703804	65683877	19836530854	302	Alamark976	WGS	RANDOM	GENOMIC	PAIRED	ILLUMINA	HiSeq X Five	PRJNA729035	SAMN19109583	Alamark976	Apis_mellifera_Alamark976	Not Applicable	1993	Egypt: Assiut	Previously Extracted DNA	Adult	27.180744 N 31.183397 E	female	NA	NA	NA	adult	female	NA		27.1807	31.1834	Egypt	Negative	0	0	0	0	0	0	174
SRR11471421	6434517	1930355100	300	AR2903	WGS	RANDOM	GENOMIC	PAIRED	ILLUMINA	Illumina HiSeq 4000	PRJNA622776	SAMN14526699	AR2903	NA	foraging on vegetation	1/20/2018	Argentina	wing muscle	adult	28.3389 S 59.2631 W	female	NA	NA	NA	adult	female	thorax		-28.3389	-59.2631	Argentina	Negative	0	0	0	0	0	13	31
SRR11471427	8361175	2508352500	300	AR2909	WGS	RANDOM	GENOMIC	PAIRED	ILLUMINA	Illumina HiSeq 4000	PRJNA622776	SAMN14526693	AR2909	NA	foraging on vegetation	1/20/2018	Argentina	wing muscle	adult	28.4883 S 59.3461 W	female	NA	NA	NA	adult	female	thorax		-28.4883	-59.3461	Argentina	Negative	0	0	0	0	0	17	28
SRR11471429	5359785	1607935500	300	AR2912	WGS	RANDOM	GENOMIC	PAIRED	ILLUMINA	Illumina HiSeq 4000	PRJNA622776	SAMN14526692	AR2912	NA	foraging on vegetation	1/20/2018	Argentina	wing muscle	adult	28.4897 S 59.3528 W	female	NA	NA	NA	adult	female	thorax		-28.4897	-59.3528	Argentina	Negative	0	0	0	0	0	16	13
SRR11471430	6139547	1841864100	300	AR2706	WGS	RANDOM	GENOMIC	PAIRED	ILLUMINA	Illumina HiSeq 4000	PRJNA622776	SAMN14526691	AR2706	NA	foraging on vegetation	1/20/2018	Argentina	wing muscle	adult	28.5625 S 59.3614 W	female	NA	NA	NA	adult	female	thorax		-28.5625	-59.3614	Argentina	Negative	0	0	0	0	0	16	16
SRR11471433	7868208	2360462400	300	AR2701	WGS	RANDOM	GENOMIC	PAIRED	ILLUMINA	Illumina HiSeq 4000	PRJNA622776	SAMN14526688	AR2701	NA	foraging on vegetation	1/19/2018	Argentina	wing muscle	adult	28.6408 S 59.4236 W	female	NA	NA	NA	adult	female	thorax		-28.6408	-59.4236	Argentina	Negative	0	0	0	0	0	9	31
SRR11471441	5551620	1665486000	300	AR2612	WGS	RANDOM	GENOMIC	PAIRED	ILLUMINA	Illumina HiSeq 4000	PRJNA622776	SAMN14526681	AR2612	NA	foraging on vegetation	1/19/2018	Argentina	wing muscle	adult	29.1039 S 59.6508 W	female	NA	NA	NA	adult	female	thorax		-29.1039	-59.6508	Argentina	Negative	0	0	0	0	0	19	12
SRR11471443	6348241	1904472300	300	AR2611	WGS	RANDOM	GENOMIC	PAIRED	ILLUMINA	Illumina HiSeq 4000	PRJNA622776	SAMN14526679	AR2611	NA	foraging on vegetation	1/19/2018	Argentina	wing muscle	adult	29.1267 S 59.6483 W	female	NA	NA	NA	adult	female	thorax		-29.1267	-59.6483	Argentina	Negative	0	0	0	0	0	12	32
SRR11471448	6665440	1999632000	300	AR2515	WGS	RANDOM	GENOMIC	PAIRED	ILLUMINA	Illumina HiSeq 4000	PRJNA622776	SAMN14526674	AR2515	NA	foraging on vegetation	1/19/2018	Argentina	wing muscle	adult	29.4661 S 59.7578 W	female	NA	NA	NA	adult	female	thorax		-29.4661	-59.7578	Argentina	Negative	0	0	0	0	0	15	17
SRR11471449	7946820	2384046000	300	AR2506	WGS	RANDOM	GENOMIC	PAIRED	ILLUMINA	Illumina HiSeq 4000	PRJNA622776	SAMN14526673	AR2506	NA	foraging on vegetation	1/19/2018	Argentina	wing muscle	adult	29.4839 S 59.7592 W	female	NA	NA	NA	adult	female	thorax		-29.4839	-59.7592	Argentina	Negative	0	0	0	0	0	10	12
SRR11471451	6041183	1812354900	300	AR2509	WGS	RANDOM	GENOMIC	PAIRED	ILLUMINA	Illumina HiSeq 4000	PRJNA622776	SAMN14526672	AR2509	NA	foraging on vegetation	1/19/2018	Argentina	wing muscle	adult	29.4886 S 59.7478 W	female	NA	NA	NA	adult	female	thorax		-29.4886	-59.7478	Argentina	Negative	0	0	0	0	0	9	30
SRR11471460	10050505	3015151500	300	AR2314	WGS	RANDOM	GENOMIC	PAIRED	ILLUMINA	Illumina HiSeq 4000	PRJNA622776	SAMN14526663	AR2314	NA	foraging on vegetation	1/19/2018	Argentina	wing muscle	adult	29.8906 S 59.8225 W	female	NA	NA	NA	adult	female	thorax		-29.8906	-59.8225	Argentina	Negative	0	0	0	0	0	17	6
SRR11471464	5620737	1686221100	300	AR2302	WGS	RANDOM	GENOMIC	PAIRED	ILLUMINA	Illumina HiSeq 4000	PRJNA622776	SAMN14526660	AR2302	NA	foraging on vegetation	1/18/2018	Argentina	wing muscle	adult	29.9075 S 59.8311 W	female	NA	NA	NA	adult	female	thorax		-29.9075	-59.8311	Argentina	Negative	0	0	0	0	0	15	12
SRR14703912	59820790	18065878580	302	Ascu_B6	WGS	RANDOM	GENOMIC	PAIRED	ILLUMINA	HiSeq X Five	PRJNA729035	SAMN19109618	Ascu_B6	Apis_mellifera_Ascu_B6	Not Applicable	2010	Kenya: Gede Ruins	1/2 Thorax	Adult	3.306498 S 40.017988 E	female	NA	NA	NA	adult	female	thorax		-3.3065	40.018	Kenya	Negative	0	0	0	0	0	110	88
SRR14703821	59722745	18036268990	302	Alamark2	WGS	RANDOM	GENOMIC	PAIRED	ILLUMINA	HiSeq X Five	PRJNA729035	SAMN19109620	Alamark2	Apis_mellifera_Alamark2	Not Applicable	2010	Kenya: Gede Ruins	1/2 Thorax	Adult	3.306498 S 40.017988 E	female	NA	NA	NA	adult	female	thorax		-3.3065	40.018	Kenya	Negative	0	0	0	0	0	40	71
SRR14703920	58778363	17751065626	302	Ascu_A6	WGS	RANDOM	GENOMIC	PAIRED	ILLUMINA	HiSeq X Five	PRJNA729035	SAMN19109617	Ascu_A6	Apis_mellifera_Ascu_A6	Not Applicable	2010	Kenya: Gede Ruins	1/2 Thorax	Adult	3.306498 S 40.017988 E	female	NA	NA	NA	adult	female	thorax		-3.3065	40.018	Kenya	Negative	0	0	0	0	0	185	98
SRR14703893	61801158	18663949716	302	Asim_yem2	WGS	RANDOM	GENOMIC	PAIRED	ILLUMINA	HiSeq X Five	PRJNA729035	SAMN19109653	Asim_yem2	Apis_mellifera_Asim_yem2	Not Applicable	2010	Kenya: Mandera	1/2 Thorax	Adult	3.889650 N 40.267400 E	female	NA	NA	NA	adult	female	thorax		3.88965	40.2674	Kenya	Negative	0	0	0	0	0	0	246
SRR14703892	59582264	17993843728	302	Asim_yem3	WGS	RANDOM	GENOMIC	PAIRED	ILLUMINA	HiSeq X Five	PRJNA729035	SAMN19109654	Asim_yem3	Apis_mellifera_Asim_yem3	Not Applicable	2010	Kenya: Mandera	1/2 Thorax	Adult	3.889650 N 40.267400 E	female	NA	NA	NA	adult	female	thorax		3.88965	40.2674	Kenya	Negative	0	0	0	0	0	84	179
SRR14703918	58636692	17708280984	302	Ascu_A8	WGS	RANDOM	GENOMIC	PAIRED	ILLUMINA	HiSeq X Five	PRJNA729035	SAMN19109651	Ascu_A8	Apis_mellifera_Ascu_A8	Not Applicable	2010	Kenya: Mandera	1/2 Thorax	Adult	3.889650 N 40.267400 E	female	NA	NA	NA	adult	female	thorax		3.88965	40.2674	Kenya	Negative	0	0	0	0	0	98	106
SRR14703917	58153888	17562474176	302	Ascu_A9	WGS	RANDOM	GENOMIC	PAIRED	ILLUMINA	HiSeq X Five	PRJNA729035	SAMN19109652	Ascu_A9	Apis_mellifera_Ascu_A9	Not Applicable	2010	Kenya: Mandera	1/2 Thorax	Adult	3.889650 N 40.267400 E	female	NA	NA	NA	adult	female	thorax		3.88965	40.2674	Kenya	Negative	0	0	0	0	0	89	102
SRR14703891	56356126	17019550052	302	Asim_yem6	WGS	RANDOM	GENOMIC	PAIRED	ILLUMINA	HiSeq X Five	PRJNA729035	SAMN19109655	Asim_yem6	Apis_mellifera_Asim_yem6	Not Applicable	2010	Kenya: Mandera	1/2 Thorax	Adult	3.889650 N 40.267400 E	female	NA	NA	NA	adult	female	thorax		3.88965	40.2674	Kenya	Negative	0	0	0	0	0	92	203
SRR14703813	73138702	22087888004	302	Alamark5	WGS	RANDOM	GENOMIC	PAIRED	ILLUMINA	HiSeq X Five	PRJNA729035	SAMN19109645	Alamark5	Apis_mellifera_Alamark5	Not Applicable	2010	Kenya: Mandera	1/2 Thorax	Adult	3.936617 N 41.868033 E	female	NA	NA	NA	adult	female	thorax		3.93662	41.868	Kenya	Negative	0	0	0	0	0	2	186
SRR14703814	71466443	21582865786	302	Alamark4	WGS	RANDOM	GENOMIC	PAIRED	ILLUMINA	HiSeq X Five	PRJNA729035	SAMN19109644	Alamark4	Apis_mellifera_Alamark4	Not Applicable	2010	Kenya: Mandera	1/2 Thorax	Adult	3.936617 N 41.868033 E	female	NA	NA	NA	adult	female	thorax		3.93662	41.868	Kenya	Negative	0	0	0	0	0	22	109
SRR14703812	61799221	18663364742	302	Alamark6	WGS	RANDOM	GENOMIC	PAIRED	ILLUMINA	HiSeq X Five	PRJNA729035	SAMN19109646	Alamark6	Apis_mellifera_Alamark6	Not Applicable	2010	Kenya: Mandera	1/2 Thorax	Adult	3.936617 N 41.868033 E	female	NA	NA	NA	adult	female	thorax		3.93662	41.868	Kenya	Negative	0	0	0	0	0	2	218
SRR14703906	66267423	20012761746	302	Ascu_lamark2	WGS	RANDOM	GENOMIC	PAIRED	ILLUMINA	HiSeq X Five	PRJNA729035	SAMN19109648	Ascu_lamark2	Apis_mellifera_Ascu_lamark2	Not Applicable	2010	Kenya: Mandera	1/2 Thorax	Adult	3.936750 N 41.868167 E	female	NA	NA	NA	adult	female	thorax		3.93675	41.8682	Kenya	Negative	0	0	0	0	0	25	170
SRR14703905	63288006	19112977812	302	Ascu_lamark3	WGS	RANDOM	GENOMIC	PAIRED	ILLUMINA	HiSeq X Five	PRJNA729035	SAMN19109649	Ascu_lamark3	Apis_mellifera_Ascu_lamark3	Not Applicable	2010	Kenya: Mandera	1/2 Thorax	Adult	3.936750 N 41.868167 E	female	NA	NA	NA	adult	female	thorax		3.93675	41.8682	Kenya	Negative	0	0	0	0	0	3	142
SRR14703907	59508085	17971441670	302	Ascu_lamark1	WGS	RANDOM	GENOMIC	PAIRED	ILLUMINA	HiSeq X Five	PRJNA729035	SAMN19109647	Ascu_lamark1	Apis_mellifera_Ascu_lamark1	Not Applicable	2010	Kenya: Mandera	1/2 Thorax	Adult	3.936750 N 41.868167 E	female	NA	NA	NA	adult	female	thorax		3.93675	41.8682	Kenya	Negative	0	0	0	0	0	4	78
SRR11471468	5224512	1567353600	300	AR2213	WGS	RANDOM	GENOMIC	PAIRED	ILLUMINA	Illumina HiSeq 4000	PRJNA622776	SAMN14526656	AR2213	NA	foraging on vegetation	1/18/2018	Argentina	wing muscle	adult	30.2667 S 59.9744 W	female	NA	NA	NA	adult	female	thorax		-30.2667	-59.9744	Argentina	Negative	0	0	0	0	0	15	3
SRR11471471	5966911	1790073300	300	AR2206	WGS	RANDOM	GENOMIC	PAIRED	ILLUMINA	Illumina HiSeq 4000	PRJNA622776	SAMN14526653	AR2206	NA	foraging on vegetation	1/18/2018	Argentina	wing muscle	adult	30.3458 S 59.9722 W	female	NA	NA	NA	adult	female	thorax		-30.3458	-59.9722	Argentina	Negative	0	0	0	0	0	6	23
SRR11471475	7110287	2133086100	300	AR2201	WGS	RANDOM	GENOMIC	PAIRED	ILLUMINA	Illumina HiSeq 4000	PRJNA622776	SAMN14526650	AR2201	NA	at entrance of a feral colony in a utility pole	1/18/2018	Argentina	wing muscle	adult	30.3944 S 59.9483 W	female	NA	NA	NA	adult	female	thorax		-30.3944	-59.9483	Argentina	Negative	0	0	0	0	0	7	9
SRR11471476	5299891	1589967300	300	AR2019	WGS	RANDOM	GENOMIC	PAIRED	ILLUMINA	Illumina HiSeq 4000	PRJNA622776	SAMN14526649	AR2019	NA	foraging on vegetation	1/18/2018	Argentina	wing muscle	adult	30.6472 S 59.9653 W	female	NA	NA	NA	adult	female	thorax		-30.6472	-59.9653	Argentina	Negative	0	0	0	0	0	13	11
SRR11471478	9076698	2723009400	300	AR2012	WGS	RANDOM	GENOMIC	PAIRED	ILLUMINA	Illumina HiSeq 4000	PRJNA622776	SAMN14526647	AR2012	NA	foraging on vegetation	1/18/2018	Argentina	wing muscle	adult	30.6708 S 59.9742 W	female	NA	NA	NA	adult	female	thorax		-30.6708	-59.9742	Argentina	Negative	0	0	0	0	0	10	21
SRR11471484	6897999	2069399700	300	AR2004	WGS	RANDOM	GENOMIC	PAIRED	ILLUMINA	Illumina HiSeq 4000	PRJNA622776	SAMN14526642	AR2004	NA	foraging on vegetation	1/18/2018	Argentina	wing muscle	adult	30.7769 S 60.0003 W	female	NA	NA	NA	adult	female	thorax		-30.7769	-60.0003	Argentina	Negative	0	0	0	0	0	0	26
SRR11471487	9864508	2959352400	300	AR1913	WGS	RANDOM	GENOMIC	PAIRED	ILLUMINA	Illumina HiSeq 4000	PRJNA622776	SAMN14526639	AR1913	NA	foraging on vegetation	1/18/2018	Argentina	wing muscle	adult	31.14 S 60.1322 W	female	NA	NA	NA	adult	female	thorax		-31.14	-60.1322	Argentina	Negative	0	0	0	0	0	11	37
SRR11471489	5940147	1782044100	300	AR1908	WGS	RANDOM	GENOMIC	PAIRED	ILLUMINA	Illumina HiSeq 4000	PRJNA622776	SAMN14526637	AR1908	NA	foraging on vegetation	1/18/2018	Argentina	wing muscle	adult	31.1839 S 60.1508 W	female	NA	NA	NA	adult	female	thorax		-31.1839	-60.1508	Argentina	Negative	0	0	0	0	0	25	6
SRR11471496	9034165	2710249500	300	AR1907	WGS	RANDOM	GENOMIC	PAIRED	ILLUMINA	Illumina HiSeq 4000	PRJNA622776	SAMN14526634	AR1907	NA	foraging on vegetation	1/18/2018	Argentina	wing muscle	adult	31.2022 S 60.16 W	female	NA	NA	NA	adult	female	thorax		-31.2022	-60.16	Argentina	Negative	0	0	0	0	0	34	23
SRR14703828	61413160	18546774320	302	Aint_mo43	WGS	RANDOM	GENOMIC	PAIRED	ILLUMINA	HiSeq X Five	PRJNA729035	SAMN19109670	Aint_mo43	Apis_mellifera_Aint_mo43	Not Applicable	2004	Morocco	1/2 thorax	Adult	31.252633 N 6.130111 W	female	NA	NA	NA	adult	female	thorax		31.2526	-6.13011	Morocco	Negative	0	0	0	0	0	7	121
SRR14703827	57277252	17297730104	302	Aint_mo46	WGS	RANDOM	GENOMIC	PAIRED	ILLUMINA	HiSeq X Five	PRJNA729035	SAMN19109671	Aint_mo46	Apis_mellifera_Aint_mo46	Not Applicable	2004	Morocco	1/2 thorax	Adult	31.252633 N 6.130111 W	female	NA	NA	NA	adult	female	thorax		31.2526	-6.13011	Morocco	Negative	0	0	0	0	0	0	160
SRR14703830	49160305	14846412110	302	Aint_mo42	WGS	RANDOM	GENOMIC	PAIRED	ILLUMINA	HiSeq X Five	PRJNA729035	SAMN19109669	Aint_mo42	Apis_mellifera_Aint_mo42	Not Applicable	2004	Morocco	1/2 thorax	Adult	31.252633 N 6.130111 W	female	NA	NA	NA	adult	female	thorax		31.2526	-6.13011	Morocco	Negative	0	0	0	0	0	38	103
SRR14703826	53716288	16222318976	302	Aint_mo82	WGS	RANDOM	GENOMIC	PAIRED	ILLUMINA	HiSeq X Five	PRJNA729035	SAMN19109672	Aint_mo82	Apis_mellifera_Aint_mo82	Not Applicable	2004	Morocco	1/2 head	Adult	31.252633 N 6.130111 W	female	NA	NA	NA	adult	female	head		31.2526	-6.13011	Morocco	Negative	0	0	0	0	0	88	49
SRR14703832	47744801	14418929902	302	Aint_mo29	WGS	RANDOM	GENOMIC	PAIRED	ILLUMINA	HiSeq X Five	PRJNA729035	SAMN19109667	Aint_mo29	Apis_mellifera_Aint_mo29	Not Applicable	2004	Morocco	1/2 thorax	Adult	31.525597 N 5.542800 W	female	NA	NA	NA	adult	female	thorax		31.5256	-5.5428	Morocco	Negative	0	0	0	0	0	188	126
SRR11471499	8581069	2574320700	300	AR1614	WGS	RANDOM	GENOMIC	PAIRED	ILLUMINA	Illumina HiSeq 4000	PRJNA622776	SAMN14526632	AR1614	NA	foraging on vegetation	1/17/2018	Argentina	wing muscle	adult	31.6222 S 60.6975 W	female	NA	NA	NA	adult	female	thorax		-31.6222	-60.6975	Argentina	Negative	0	0	0	0	0	14	29
SRR11471503	7917676	2375302800	300	AR1609	WGS	RANDOM	GENOMIC	PAIRED	ILLUMINA	Illumina HiSeq 4000	PRJNA622776	SAMN14526628	AR1609	NA	foraging on vegetation	1/17/2018	Argentina	wing muscle	adult	31.6678 S 60.7525 W	female	NA	NA	NA	adult	female	thorax		-31.6678	-60.7525	Argentina	Negative	0	0	0	0	0	12	34
SRR11471507	11419773	3425931900	300	AR1604	WGS	RANDOM	GENOMIC	PAIRED	ILLUMINA	Illumina HiSeq 4000	PRJNA622776	SAMN14526624	AR1604	NA	foraging on vegetation	1/17/2018	Argentina	wing muscle	adult	31.6936 S 60.7636 W	female	NA	NA	NA	adult	female	thorax		-31.6936	-60.7636	Argentina	Negative	0	0	0	0	0	12	14
SRR11471519	7401150	2220345000	300	AR1402	WGS	RANDOM	GENOMIC	PAIRED	ILLUMINA	Illumina HiSeq 4000	PRJNA622776	SAMN14526610	AR1402	NA	foraging on vegetation	1/16/2018	Argentina	wing muscle	adult	32.3514 S 60.9403 W	female	NA	NA	NA	adult	female	thorax		-32.3514	-60.9403	Argentina	Negative	0	0	0	0	0	24	3
SRR11471521	8731874	2619562200	300	AR1405	WGS	RANDOM	GENOMIC	PAIRED	ILLUMINA	Illumina HiSeq 4000	PRJNA622776	SAMN14526608	AR1405	NA	foraging on vegetation	1/16/2018	Argentina	wing muscle	adult	32.3606 S 60.9447 W	female	NA	NA	NA	adult	female	thorax		-32.3606	-60.9447	Argentina	Negative	0	0	0	0	0	33	10
SRR11471524	6531483	1959444900	300	AR1311	WGS	RANDOM	GENOMIC	PAIRED	ILLUMINA	Illumina HiSeq 4000	PRJNA622776	SAMN14526605	AR1311	NA	foraging on vegetation	1/16/2018	Argentina	wing muscle	adult	32.6597 S 60.7875 W	female	NA	NA	NA	adult	female	thorax		-32.6597	-60.7875	Argentina	Negative	0	0	0	0	0	25	18
SRR11471530	6923437	2077031100	300	AR1301	WGS	RANDOM	GENOMIC	PAIRED	ILLUMINA	Illumina HiSeq 4000	PRJNA622776	SAMN14526600	AR1301	NA	foraging on vegetation	1/16/2018	Argentina	wing muscle	adult	32.7336 S 60.7425 W	female	NA	NA	NA	adult	female	thorax		-32.7336	-60.7425	Argentina	Negative	0	0	0	0	0	25	10
SRR11471418	9827262	2948178600	300	CA0121	WGS	RANDOM	GENOMIC	PAIRED	ILLUMINA	Illumina HiSeq 4000	PRJNA622776	SAMN14526702	CA0121	NA	foraging on vegetation	8/4/2018	USA: California	wing muscle	adult	32.745 N 117.0575 W	female	NA	NA	NA	adult	female	thorax		32.745	-117.058	USA	Negative	0	0	0	0	0	23	6
SRR11471415	6489467	1946840100	300	CA0126	WGS	RANDOM	GENOMIC	PAIRED	ILLUMINA	Illumina HiSeq 4000	PRJNA622776	SAMN14526704	CA0126	NA	foraging on vegetation	8/4/2018	USA: California	wing muscle	adult	32.7806 N 116.8733 W	female	NA	NA	NA	adult	female	thorax		32.7806	-116.873	USA	Negative	0	0	0	0	0	17	17
SRR11471413	5541320	1662396000	300	CA0119	WGS	RANDOM	GENOMIC	PAIRED	ILLUMINA	Illumina HiSeq 4000	PRJNA622776	SAMN14526706	CA0119	NA	foraging on vegetation	8/4/2018	USA: California	wing muscle	adult	32.7967 N 117.0944 W	female	NA	NA	NA	adult	female	thorax		32.7967	-117.094	USA	Negative	0	0	0	0	0	36	0
SRR11471534	10680067	3204020100	300	AR1214	WGS	RANDOM	GENOMIC	PAIRED	ILLUMINA	Illumina HiSeq 4000	PRJNA622776	SAMN14526596	AR1214	NA	foraging on vegetation	1/16/2018	Argentina	wing muscle	adult	32.9097 S 60.6878 W	female	NA	NA	NA	adult	female	thorax		-32.9097	-60.6878	Argentina	Negative	0	0	0	0	0	21	0
SRR11471404	5737712	1721313600	300	CA0226	WGS	RANDOM	GENOMIC	PAIRED	ILLUMINA	Illumina HiSeq 4000	PRJNA622776	SAMN14526714	CA0226	NA	foraging on vegetation	8/4/2018	USA: California	wing muscle	adult	33.1653 N 117.0147 W	female	NA	NA	NA	adult	female	thorax		33.1653	-117.015	USA	Negative	0	0	0	0	0	27	35
SRR11471544	6675701	2002710300	300	AR1107	WGS	RANDOM	GENOMIC	PAIRED	ILLUMINA	Illumina HiSeq 4000	PRJNA622776	SAMN14526587	AR1107	NA	foraging on vegetation	1/21/2018	Argentina	wing muscle	adult	33.2681 S 60.2889 W	female	NA	NA	NA	adult	female	thorax		-33.2681	-60.2889	Argentina	Negative	0	0	0	0	0	31	11
SRR11471546	13124229	3937268700	300	AR1112	WGS	RANDOM	GENOMIC	PAIRED	ILLUMINA	Illumina HiSeq 4000	PRJNA622776	SAMN14526585	AR1112	NA	foraging on vegetation	1/21/2018	Argentina	wing muscle	adult	33.3022 S 60.2514 W	female	NA	NA	NA	adult	female	thorax		-33.3022	-60.2514	Argentina	Negative	0	0	0	0	0	16	15
SRR11471393	5517769	1655330700	300	CA0317	WGS	RANDOM	GENOMIC	PAIRED	ILLUMINA	Illumina HiSeq 4000	PRJNA622776	SAMN14526723	CA0317	NA	foraging on vegetation	6/18/2018	USA: California	wing muscle	adult	33.5217 N 117.1514 W	female	NA	NA	NA	adult	female	thorax		33.5217	-117.151	USA	Negative	0	0	0	0	0	24	0
SRR11471552	7135325	2140597500	300	AR1007	WGS	RANDOM	GENOMIC	PAIRED	ILLUMINA	Illumina HiSeq 4000	PRJNA622776	SAMN14526580	AR1007	NA	foraging on vegetation	1/22/2018	Argentina	wing muscle	adult	33.6608 S 60.3961 W	female	NA	NA	NA	adult	female	thorax		-33.6608	-60.3961	Argentina	Negative	0	0	0	0	0	20	0
SRR11471557	5633476	1690042800	300	AR1017	WGS	RANDOM	GENOMIC	PAIRED	ILLUMINA	Illumina HiSeq 4000	PRJNA622776	SAMN14526575	AR1017	NA	foraging on vegetation	1/22/2018	Argentina	wing muscle	adult	33.7525 S 60.442 W	female	NA	NA	NA	adult	female	thorax		-33.7525	-60.442	Argentina	Negative	0	0	0	0	0	29	12
SRR11471657	8912408	2673722400	300	CA0527	WGS	RANDOM	GENOMIC	PAIRED	ILLUMINA	Illumina HiSeq 4000	PRJNA622776	SAMN14526736	CA0527	NA	foraging on vegetation	8/5/2018	USA: California	wing muscle	adult	34.0972 N 118.1058 W	female	NA	NA	NA	adult	female	thorax		34.0972	-118.106	USA	Negative	0	0	0	0	0	19	18
SRR11471654	5192051	1557615300	300	CA0524	WGS	RANDOM	GENOMIC	PAIRED	ILLUMINA	Illumina HiSeq 4000	PRJNA622776	SAMN14526739	CA0524	NA	foraging on vegetation	8/5/2018	USA: California	wing muscle	adult	34.1453 N 117.8958 W	female	NA	NA	NA	adult	female	thorax		34.1453	-117.896	USA	Negative	0	0	0	0	0	30	6
SRR11471567	5775706	1732711800	300	AR0915	WGS	RANDOM	GENOMIC	PAIRED	ILLUMINA	Illumina HiSeq 4000	PRJNA622776	SAMN14526566	AR0915	NA	foraging on vegetation	1/22/2018	Argentina	wing muscle	adult	34.2031 S 60.7356 W	female	NA	NA	NA	adult	female	thorax		-34.2031	-60.7356	Argentina	Negative	0	0	0	0	0	22	0
SRR11471642	7020916	2106274800	300	CA0801	WGS	RANDOM	GENOMIC	PAIRED	ILLUMINA	Illumina HiSeq 4000	PRJNA622776	SAMN14526750	CA0801	NA	foraging on vegetation	6/16/2018	USA: California	wing muscle	adult	34.4972 N 118.6256 W	female	NA	NA	NA	adult	female	thorax		34.4972	-118.626	USA	Negative	0	0	0	0	0	20	13
SRR11471570	5307180	1592154000	300	AR0815	WGS	RANDOM	GENOMIC	PAIRED	ILLUMINA	Illumina HiSeq 4000	PRJNA622776	SAMN14526563	AR0815	NA	foraging on vegetation	1/22/2018	Argentina	wing muscle	adult	34.5614 S 60.8719 W	female	NA	NA	NA	adult	female	thorax		-34.5614	-60.8719	Argentina	Negative	0	0	0	0	0	46	0
SRR11471576	7031878	2109563400	300	AR0816	WGS	RANDOM	GENOMIC	PAIRED	ILLUMINA	Illumina HiSeq 4000	PRJNA622776	SAMN14526558	AR0816	NA	foraging on vegetation	1/22/2018	Argentina	wing muscle	adult	34.5731 S 60.9075 W	female	NA	NA	NA	adult	female	thorax		-34.5731	-60.9075	Argentina	Negative	0	0	0	0	0	34	0
SRR11471580	7274587	2182376100	300	AR0604	WGS	RANDOM	GENOMIC	PAIRED	ILLUMINA	Illumina HiSeq 4000	PRJNA622776	SAMN14526554	AR0604	NA	foraging on vegetation	1/23/2018	Argentina	wing muscle	adult	34.9078 S 61.0161 W	female	NA	NA	NA	adult	female	thorax		-34.9078	-61.0161	Argentina	Negative	0	0	0	0	0	15	10
SRR11471584	8190203	2457060900	300	AR0611	WGS	RANDOM	GENOMIC	PAIRED	ILLUMINA	Illumina HiSeq 4000	PRJNA622776	SAMN14526551	AR0611	NA	foraging on vegetation	1/23/2018	Argentina	wing muscle	adult	34.9969 S 61.0356 W	female	NA	NA	NA	adult	female	thorax		-34.9969	-61.0356	Argentina	Negative	0	0	0	0	0	35	8
SRR11471629	5997601	1799280300	300	CA1012	WGS	RANDOM	GENOMIC	PAIRED	ILLUMINA	Illumina HiSeq 4000	PRJNA622776	SAMN14526762	CA1012	NA	foraging on vegetation	6/25/2018	USA: California	wing muscle	adult	35.1347 N 120.5056 W	female	NA	NA	NA	adult	female	thorax		35.1347	-120.506	USA	Negative	0	0	0	0	0	19	5
SRR11471650	10542093	3162627900	300	AR0515	WGS	RANDOM	GENOMIC	PAIRED	ILLUMINA	Illumina HiSeq 4000	PRJNA622776	SAMN14526545	AR0515	NA	foraging on vegetation	1/23/2018	Argentina	wing muscle	adult	35.3886 S 61.0097 W	female	NA	NA	NA	adult	female	thorax		-35.3886	-61.0097	Argentina	Negative	0	0	0	0	0	48	9
SRR11471621	7992770	2397831000	300	CA1118	WGS	RANDOM	GENOMIC	PAIRED	ILLUMINA	Illumina HiSeq 4000	PRJNA622776	SAMN14526769	CA1118	NA	foraging on vegetation	6/25/2018	USA: California	wing muscle	adult	35.4381 N 120.5433 W	female	NA	NA	NA	adult	female	thorax		35.4381	-120.543	USA	Negative	0	0	0	0	0	36	7
SRR11471406	7141990	2142597000	300	AR0506	WGS	RANDOM	GENOMIC	PAIRED	ILLUMINA	Illumina HiSeq 4000	PRJNA622776	SAMN14526542	AR0506	NA	foraging on vegetation	1/23/2018	Argentina	wing muscle	adult	35.4397 S 60.9022 W	female	NA	NA	NA	adult	female	thorax		-35.4397	-60.9022	Argentina	Negative	0	0	0	0	0	34	0
SRR11471461	7583611	2275083300	300	AR0306	WGS	RANDOM	GENOMIC	PAIRED	ILLUMINA	Illumina HiSeq 4000	PRJNA622776	SAMN14526537	AR0306	NA	foraging on vegetation	1/23/2018	Argentina	wing muscle	adult	35.7597 S 60.8853 W	female	NA	NA	NA	adult	female	thorax		-35.7597	-60.8853	Argentina	Negative	0	0	0	0	0	29	0
SRR11471472	5193106	1557931800	300	AR0308	WGS	RANDOM	GENOMIC	PAIRED	ILLUMINA	Illumina HiSeq 4000	PRJNA622776	SAMN14526536	AR0308	NA	foraging on vegetation	1/23/2018	Argentina	wing muscle	adult	35.7711 S 60.9061 W	female	NA	NA	NA	adult	female	thorax		-35.7711	-60.9061	Argentina	Negative	0	0	0	0	0	25	0
SRR11471611	5024372	1507311600	300	CA1216	WGS	RANDOM	GENOMIC	PAIRED	ILLUMINA	Illumina HiSeq 4000	PRJNA622776	SAMN14526778	CA1216	NA	foraging on vegetation	6/24/2018	USA: California	wing muscle	adult	35.8017 N 120.8556 W	female	NA	NA	NA	adult	female	thorax		35.8017	-120.856	USA	Negative	0	0	0	0	0	13	8
SRR11471527	9670519	2901155700	300	AR0101	WGS	RANDOM	GENOMIC	PAIRED	ILLUMINA	Illumina HiSeq 4000	PRJNA622776	SAMN14526531	AR0101	NA	foraging on vegetation	1/23/2018	Argentina	wing muscle	adult	36.1528 S 61.0769 W	female	NA	NA	NA	adult	female	thorax		-36.1528	-61.0769	Argentina	Negative	0	0	0	0	0	31	0
SRR11471538	6596200	1978860000	300	AR0103	WGS	RANDOM	GENOMIC	PAIRED	ILLUMINA	Illumina HiSeq 4000	PRJNA622776	SAMN14526530	AR0103	NA	foraging on vegetation	1/23/2018	Argentina	wing muscle	adult	36.1822 S 61.1158 W	female	NA	NA	NA	adult	female	thorax		-36.1822	-61.1158	Argentina	Negative	0	0	0	0	0	29	0
SRR11471571	6250451	1875135300	300	AR0113	WGS	RANDOM	GENOMIC	PAIRED	ILLUMINA	Illumina HiSeq 4000	PRJNA622776	SAMN14526527	AR0113	NA	foraging on vegetation	1/24/2018	Argentina	wing muscle	adult	36.2256 S 61.1053 W	female	NA	NA	NA	adult	female	thorax		-36.2256	-61.1053	Argentina	Negative	0	0	0	0	0	30	0
SRR11471607	10688999	3206699700	300	AR0115	WGS	RANDOM	GENOMIC	PAIRED	ILLUMINA	Illumina HiSeq 4000	PRJNA622776	SAMN14526523	AR0115	NA	foraging on vegetation	1/24/2018	Argentina	wing muscle	adult	36.2433 S 61.1128 W	female	NA	NA	NA	adult	female	thorax		-36.2433	-61.1128	Argentina	Negative	0	0	0	0	0	25	11
SRR14703890	25379034	7664468268	302	Asyr_485	WGS	RANDOM	GENOMIC	PAIRED	ILLUMINA	HiSeq X Five	PRJNA729035	SAMN19109625	Asyr_485	Apis_mellifera_Asyr_485	Not Applicable	1997	Turkey: Hatay	Previously Extracted DNA	Adult	36.283333 N 36.300000 E	female	NA	NA	NA	adult	female	NA		36.2833	36.3	Turkey	Negative	0	0	0	0	0	141	0
SRR14703781	120040991	36252379282	302	Anatoli_498	WGS	RANDOM	GENOMIC	PAIRED	ILLUMINA	HiSeq X Five	PRJNA729035	SAMN19109724	Anatoli_498	Apis_mellifera_Anatoli_498	Not Applicable	1995	Turkey: Fethiye	Previously Extracted DNA	Adult	36.621667 N 29.116389 E	female	NA	NA	NA	adult	female	NA		36.6217	29.1164	Turkey	Negative	0	0	0	0	0	98	0
SRR14703780	54005183	16309565266	302	Anatoli_500	WGS	RANDOM	GENOMIC	PAIRED	ILLUMINA	HiSeq X Five	PRJNA729035	SAMN19109718	Anatoli_500	Apis_mellifera_Anatoli_500	Not Applicable	1995	Turkey: Fethiye	Previously Extracted DNA	Adult	36.621667 N 29.116389 E	female	NA	NA	NA	adult	female	NA		36.6217	29.1164	Turkey	Negative	0	0	0	0	0	124	0
SRR11471585	6190998	1857299400	300	CA1419	WGS	RANDOM	GENOMIC	PAIRED	ILLUMINA	Illumina HiSeq 4000	PRJNA622776	SAMN14526800	CA1419	NA	foraging on vegetation	6/27/2018	USA: California	wing muscle	adult	36.6728 N 121.5997 W	female	NA	NA	NA	adult	female	thorax		36.6728	-121.6	USA	Negative	0	0	0	0	0	20	0
SRR14703845	99785381	30135185062	302	AiberCord1_4	WGS	RANDOM	GENOMIC	PAIRED	ILLUMINA	HiSeq X Five	PRJNA729035	SAMN19109596	AiberCord1_4	Apis_mellifera_AiberCord1_4	Not Applicable	1988	Spain: Cordoba	Previously Extracted DNA	Adult	37.883333 N 4.766667 W	female	NA	NA	NA	adult	female	NA		37.8833	-4.76667	Spain	Negative	0	0	0	0	0	94	0
SRR14703844	69057788	20855451976	302	AiberCord2_1	WGS	RANDOM	GENOMIC	PAIRED	ILLUMINA	HiSeq X Five	PRJNA729035	SAMN19109597	AiberCord2_1	Apis_mellifera_AiberCord2_1	Not Applicable	1988	Spain: Cordoba	Previously Extracted DNA	Adult	37.883333 N 4.766667 W	female	NA	NA	NA	adult	female	NA		37.8833	-4.76667	Spain	Negative	0	0	0	0	0	125	0
SRR17712916	11029750	2228009500	202	C5EL9ACXX	WGS	RANDOM	GENOMIC	PAIRED	ILLUMINA	Illumina HiSeq 2500	PRJNA799756	SAMN25208295	3512	not applicable	From an apiary	2013	Italy: Sicily	entire bee	NA	37.960106 N 13.722925 E	NA	NA	NA	NA	NA	NA	whole body		37.9601	13.7229	Italy	Negative	0	0	0	0	0	175	100
SRR14703783	45922158	13868491716	302	Anatoli_493	WGS	RANDOM	GENOMIC	PAIRED	ILLUMINA	HiSeq X Five	PRJNA729035	SAMN19109722	Anatoli_493	Apis_mellifera_Anatoli_493	Not Applicable	1995	Turkey: Menemen	Previously Extracted DNA	Adult	38.606667 N 27.070000 E	female	NA	NA	NA	adult	female	NA		38.6067	27.07	Turkey	Negative	0	0	0	0	0	100	0
SRR14703910	69912077	21113447254	302	Ascu_B8	WGS	RANDOM	GENOMIC	PAIRED	ILLUMINA	HiSeq X Five	PRJNA729035	SAMN19109712	Ascu_B8	Apis_mellifera_Ascu_B8	Not Applicable	2010	Kenya: Tanzania border	1/2 Thorax	Adult	4.528990 S 39.153618 E	female	NA	NA	NA	adult	female	thorax		-4.52899	39.1536	Kenya	Negative	0	0	0	0	0	107	212
SRR14703909	66293729	20020706158	302	Ascu_B9	WGS	RANDOM	GENOMIC	PAIRED	ILLUMINA	HiSeq X Five	PRJNA729035	SAMN19109713	Ascu_B9	Apis_mellifera_Ascu_B9	Not Applicable	2010	Kenya: Tanzania border	1/2 Thorax	Adult	4.528990 S 39.153618 E	female	NA	NA	NA	adult	female	thorax		-4.52899	39.1536	Kenya	Negative	0	0	0	0	0	87	215
SRR14703778	78449705	23691810910	302	Anatoli_713	WGS	RANDOM	GENOMIC	PAIRED	ILLUMINA	HiSeq X Five	PRJNA729035	SAMN19109720	Anatoli_713	Apis_mellifera_Anatoli_713	Not Applicable	1995	Turkey: Fethiye	Previously Extracted DNA	Adult	40.290278 N 29.448333 E	female	NA	NA	NA	adult	female	NA		40.2903	29.4483	Turkey	Negative	0	0	0	0	0	141	0
SRR14703847	49460732	14937141064	302	Acauca527	WGS	RANDOM	GENOMIC	PAIRED	ILLUMINA	HiSeq X Five	PRJNA729035	SAMN19109681	Acauca527	Apis_mellifera_Acauca527	Not Applicable	1995	Turkey: Posov	Previously Extracted DNA	Adult	41.241944 N 42.364444 E	female	NA	NA	NA	adult	female	NA		41.2419	42.3644	Turkey	Negative	0	0	0	0	0	121	0
SRR14703793	66593077	20111109254	302	Amel_715	WGS	RANDOM	GENOMIC	PAIRED	ILLUMINA	HiSeq X Five	PRJNA729035	SAMN19109585	Amel_715	Apis_mellifera_Amel_715	Not Applicable	1988	France: Avignon	Previously Extracted DNA	Adult	43.933333 N 4.800000 E	female	NA	NA	NA	adult	female	NA		43.9333	4.8	France	Negative	0	0	0	0	0	93	0
SRR14703791	68842119	20790319938	302	Amel_720	WGS	RANDOM	GENOMIC	PAIRED	ILLUMINA	HiSeq X Five	PRJNA729035	SAMN19109631	Amel_720	Apis_mellifera_Amel_720	Not Applicable	1988	France: Landes	Previously Extracted DNA	Adult	44.000000 N 1.000000 E	female	NA	NA	NA	adult	female	NA		44	1	France	Negative	0	0	0	0	0	149	0
SRR14703797	86894057	26242005214	302	Aligui_793	WGS	RANDOM	GENOMIC	PAIRED	ILLUMINA	HiSeq X Five	PRJNA729035	SAMN19109666	Aligui_793	Apis_mellifera_Aligui_793	Not Applicable	1988	Italy: Bolongna	Previously Extracted DNA	Adult	44.500000 N 11.350000 E	female	NA	NA	NA	adult	female	NA		44.5	11.35	Italy	Negative	0	0	0	0	0	217	0
SRR14703798	45035913	13600845726	302	Aligui_792	WGS	RANDOM	GENOMIC	PAIRED	ILLUMINA	HiSeq X Five	PRJNA729035	SAMN19109665	Aligui_792	Apis_mellifera_Aligui_792	Not Applicable	1988	Italy: Bolongna	Previously Extracted DNA	Adult	44.500000 N 11.350000 E	female	NA	NA	NA	adult	female	NA		44.5	11.35	Italy	Negative	0	0	0	0	0	111	0
SRR14703802	67113886	20268393572	302	Aligui_782	WGS	RANDOM	GENOMIC	PAIRED	ILLUMINA	HiSeq X Five	PRJNA729035	SAMN19109661	Aligui_782	Apis_mellifera_Aligui_782	Not Applicable	1988	Italy: Milano	Previously Extracted DNA	Adult	45.466667 N 9.200000 E	female	NA	NA	NA	adult	female	NA		45.4667	9.2	Italy	Negative	0	0	0	0	0	135	0
SRR14703800	64247283	19402679466	302	Aligui_788	WGS	RANDOM	GENOMIC	PAIRED	ILLUMINA	HiSeq X Five	PRJNA729035	SAMN19109663	Aligui_788	Apis_mellifera_Aligui_788	Not Applicable	1988	Italy: Milano	Previously Extracted DNA	Adult	45.466667 N 9.200000 E	female	NA	NA	NA	adult	female	NA		45.4667	9.2	Italy	Negative	0	0	0	0	0	125	0
SRR14703801	58013310	17520019620	302	Aligui_784	WGS	RANDOM	GENOMIC	PAIRED	ILLUMINA	HiSeq X Five	PRJNA729035	SAMN19109662	Aligui_784	Apis_mellifera_Aligui_784	Not Applicable	1988	Italy: Milano	Previously Extracted DNA	Adult	45.466667 N 9.200000 E	female	NA	NA	NA	adult	female	NA		45.4667	9.2	Italy	Negative	0	0	0	0	0	89	0
SRR14703869	60027604	18128336408	302	Ayem_eth10	WGS	RANDOM	GENOMIC	PAIRED	ILLUMINA	HiSeq X Five	PRJNA729035	SAMN19109600	Ayem_eth10	Apis_mellifera_Ayem_eth10	Not Applicable	2006	Ethiopia: Daba	1/2 thorax	Adult	9.383214 N 41.965539 E	female	NA	NA	NA	adult	female	thorax		9.38321	41.9655	Ethiopia	Negative	0	0	0	0	0	110	48
SRR14703863	59060253	17836196406	302	Ayem_eth9	WGS	RANDOM	GENOMIC	PAIRED	ILLUMINA	HiSeq X Five	PRJNA729035	SAMN19109605	Ayem_eth9	Apis_mellifera_Ayem_eth9	Not Applicable	2006	Ethiopia: Daba	1/2 thorax	Adult	9.383214 N 41.965539 E	female	NA	NA	NA	adult	female	thorax		9.38321	41.9655	Ethiopia	Negative	0	0	0	0	0	55	137
SRR14703865	57942700	17498695400	302	Ayem_eth7	WGS	RANDOM	GENOMIC	PAIRED	ILLUMINA	HiSeq X Five	PRJNA729035	SAMN19109603	Ayem_eth7	Apis_mellifera_Ayem_eth7	Not Applicable	2006	Ethiopia: Daba	1/2 thorax	Adult	9.383214 N 41.965539 E	female	NA	NA	NA	adult	female	thorax		9.38321	41.9655	Ethiopia	Negative	0	0	0	0	0	223	51
SRR14703864	51748359	15628004418	302	Ayem_eth8	WGS	RANDOM	GENOMIC	PAIRED	ILLUMINA	HiSeq X Five	PRJNA729035	SAMN19109604	Ayem_eth8	Apis_mellifera_Ayem_eth8	Not Applicable	2006	Ethiopia: Daba	1/2 thorax	Adult	9.383214 N 41.965539 E	female	NA	NA	NA	adult	female	thorax		9.38321	41.9655	Ethiopia	Negative	0	0	0	0	0	112	120
SRR8468942	100494016	30198609730	300	705506.Apis65.P03.AR.core	WGS	RANDOM	GENOMIC	PAIRED	ILLUMINA	Illumina HiSeq 4000	PRJNA507348	SAMN10784738	705506_Apis65_P03_AR_core	705506.Apis65.P03.AR.core	Beehive, offspring of a naturally mated Cape Honeybee queen from the Cape of Good Hope peninsula	2016	South Africa: Cape of Good Hope region	whole body	NA	NA	female	NA	NA	NA	NA	female	whole body		NA	NA	South Africa	Negative	0	0	0	0	0	40	55
SRR5580806	98994789	9899478900	100	SRCD9A	WGS	RANDOM	GENOMIC	SINGLE	ILLUMINA	Illumina HiSeq 2000	PRJNA385500	SAMN06921471	SRCD9A	worker bee	San Jacinto Mountains	2014	USA:CA, Riverside Co. San Jacinto Mnt. Idyllwild, Roadside corner Hwy 243 ad Marion Ridge Dr. next to Fire Station, replicate 2	whole body	NA	NA	female	adult	NA	NA	adult	female	whole body		NA	NA	USA	Negative	0	0	0	0	0	3	4
SRR5580833	83772940	8377294000	100	SRCD47C	WGS	RANDOM	GENOMIC	SINGLE	ILLUMINA	Illumina HiSeq 2000	PRJNA385500	SAMN06921490	SRCD47C	worker bee	Stanislaus County	2014	USA:CA, Stanislaus County, replicate 4	whole body	NA	NA	female	adult	NA	NA	adult	female	whole body		NA	NA	USA	Negative	0	0	0	0	0	7	0
SRR5580791	82352311	8235231100	100	SRCD52A	WGS	RANDOM	GENOMIC	SINGLE	ILLUMINA	Illumina HiSeq 2000	PRJNA385500	SAMN06921463	SRCD52A	worker bee	Catalina Island	2014	USA:CA, Los Angeles Co., Catalina Is. Avalon; 236 Catalina Ave, replicate 5	whole body	NA	NA	female	adult	NA	NA	adult	female	whole body		NA	NA	USA	Negative	0	0	0	0	0	10	5
SRR5580807	74886692	7488669200	100	SRCD6A	WGS	RANDOM	GENOMIC	SINGLE	ILLUMINA	Illumina HiSeq 2000	PRJNA385500	SAMN06921470	SRCD6A	worker bee	San Jacinto Mountains	2014	USA:CA, Riverside Co. San Jacinto Mnt. Idyllwild, Roadside corner Hwy 243 ad Marion Ridge Dr. next to Fire Station, replicate 1	whole body	NA	NA	female	adult	NA	NA	adult	female	whole body		NA	NA	USA	Negative	0	0	0	0	0	6	0
SRR5580798	72391964	7239196400	100	SRCD10B	WGS	RANDOM	GENOMIC	SINGLE	ILLUMINA	Illumina HiSeq 2000	PRJNA385500	SAMN06921475	SRCD10B	worker bee	Nature Preserve	2014	USA:CA, Riverside Co., NEAR 1000 Palms Oasis, in Sky Valley at 77810 Las Montanas Rd, Plam Desert 92211, replicate 1	whole body	NA	NA	female	adult	NA	NA	adult	female	whole body		NA	NA	USA	Negative	0	0	0	0	0	8	0
SRR8468989	70604643	21216848378	300	707506.Apis67.P23.TH.core-extended	WGS	RANDOM	GENOMIC	PAIRED	ILLUMINA	Illumina HiSeq 4000	PRJNA507348	SAMN10784761	707506_Apis67_P23_TH_core-extended	707506.Apis67.P23.TH.core-extended	Beehive, offspring of a naturally mated Cape Honeybee queen from the Cape of Good Hope peninsula	2016	South Africa: Cape of Good Hope region	whole body	NA	NA	female	NA	NA	NA	NA	female	whole body		NA	NA	South Africa	Negative	0	0	0	0	0	27	76
SRR5580784	69505644	6950564400	100	SRCD11A	WGS	RANDOM	GENOMIC	SINGLE	ILLUMINA	Illumina HiSeq 2000	PRJNA385500	SAMN06921447	SRCD11A	worker bee	Residential Area	2014	USA:CA, LA Co. Placeria Cyn. Residential area 25227 Running Horse Rd., replicate 3	whole body	NA	NA	female	adult	NA	NA	adult	female	whole body		NA	NA	USA	Negative	0	0	0	0	0	21	0
SRR8468954	68884023	20699896710	300	710506.Apis70.P19.TH.core-extended	WGS	RANDOM	GENOMIC	PAIRED	ILLUMINA	Illumina HiSeq 4000	PRJNA507348	SAMN10784765	710506_Apis70_P19_TH_core-extended	710506.Apis70.P19.TH.core-extended	Beehive, offspring of a naturally mated Cape Honeybee queen from the Cape of Good Hope peninsula	2016	South Africa: Cape of Good Hope region	whole body	NA	NA	female	NA	NA	NA	NA	female	whole body		NA	NA	South Africa	Negative	0	0	0	0	0	46	144
SRR5580851	68715765	6871576500	100	SRCD12A	WGS	RANDOM	GENOMIC	SINGLE	ILLUMINA	Illumina HiSeq 2000	PRJNA385500	SAMN06921501	SRCD12A	worker bee	Arcata, Residential	2014	USA:CA,Humboldt County, Union Street, Arcata, California, replicate 1	whole body	NA	NA	female	adult	NA	NA	adult	female	whole body		NA	NA	USA	Negative	0	0	0	0	0	10	0
SRR5580848	68383856	6838385600	100	SRCD12B	WGS	RANDOM	GENOMIC	SINGLE	ILLUMINA	Illumina HiSeq 2000	PRJNA385500	SAMN06921502	SRCD12B	worker bee	Arcata, Residential	2014	USA:CA,Humboldt County, Union Street, Arcata, California, replicate 2	whole body	NA	NA	female	adult	NA	NA	adult	female	whole body		NA	NA	USA	Negative	0	0	0	0	0	34	0
SRR5580852	66477380	6647738000	100	SRCD45A	WGS	RANDOM	GENOMIC	SINGLE	ILLUMINA	Illumina HiSeq 2000	PRJNA385500	SAMN06921504	SRCD45A	worker bee	Arcata, Residential	2014	USA:CA,Humboldt County, Union Street, Arcata, California, replicate 4	whole body	NA	NA	female	adult	NA	NA	adult	female	whole body		NA	NA	USA	Negative	0	0	0	0	0	8	0
SRR5580795	65571137	6557113700	100	SRCD8C	WGS	RANDOM	GENOMIC	SINGLE	ILLUMINA	Illumina HiSeq 2000	PRJNA385500	SAMN06921459	SRCD8C	worker bee	Catalina Island	2014	USA:CA, Los Angeles Co., Catalina Is. Avalon; 236 Catalina Ave, replicate 1	whole body	NA	NA	female	adult	NA	NA	adult	female	whole body		NA	NA	USA	Negative	0	0	0	0	0	5	0
SRR5580860	64096083	6409608300	100	SRCD10C	WGS	RANDOM	GENOMIC	SINGLE	ILLUMINA	Illumina HiSeq 2000	PRJNA385500	SAMN06921442	SRCD10C	worker bee	Nature Center	2014	USA:CA, LA Co. Placeria Cyn. about .5 miles past the nature center, replicate 1	whole body	NA	NA	female	adult	NA	NA	adult	female	whole body		NA	NA	USA	Negative	0	0	0	0	0	6	6
SRR5580785	63025684	6302568400	100	SRCD6C	WGS	RANDOM	GENOMIC	SINGLE	ILLUMINA	Illumina HiSeq 2000	PRJNA385500	SAMN06921446	SRCD6C	worker bee	Residential Area	2014	USA:CA, LA Co. Placeria Cyn. Residential area 25227 Running Horse Rd., replicate 2	whole body	NA	NA	female	adult	NA	NA	adult	female	whole body		NA	NA	USA	Negative	0	0	0	0	0	7	5
SRR5580830	62645097	6264509700	100	SRCD46B	WGS	RANDOM	GENOMIC	SINGLE	ILLUMINA	Illumina HiSeq 2000	PRJNA385500	SAMN06921489	SRCD46B	worker bee	Stanislaus County	2014	USA:CA, Stanislaus County, replicate 3	whole body	NA	NA	female	adult	NA	NA	adult	female	whole body		NA	NA	USA	Negative	0	0	0	0	0	12	8
SRR5580835	62374545	6237454500	100	SRCD51A	WGS	RANDOM	GENOMIC	SINGLE	ILLUMINA	Illumina HiSeq 2000	PRJNA385500	SAMN06921492	SRCD51A	worker bee	Stanislaus County	2014	USA:CA, Stanislaus County, replicate 6	whole body	NA	NA	female	adult	NA	NA	adult	female	whole body		NA	NA	USA	Negative	0	0	0	0	0	5	3
SRR5580861	61769642	6176964200	100	SRCD11B	WGS	RANDOM	GENOMIC	SINGLE	ILLUMINA	Illumina HiSeq 2000	PRJNA385500	SAMN06921443	SRCD11B	worker bee	Nature Center	2014	USA:CA, LA Co. Placeria Cyn. about .5 miles past the nature center, replicate 2	whole body	NA	NA	female	adult	NA	NA	adult	female	whole body		NA	NA	USA	Negative	0	0	0	0	0	14	0
SRR5580853	61516703	6151670300	100	SRCD45B	WGS	RANDOM	GENOMIC	SINGLE	ILLUMINA	Illumina HiSeq 2000	PRJNA385500	SAMN06921505	SRCD45B	worker bee	Arcata, Residential	2014	USA:CA,Humboldt County, Union Street, Arcata, California, replicate 5	whole body	NA	NA	female	adult	NA	NA	adult	female	whole body		NA	NA	USA	Negative	0	0	0	0	0	13	0
SRR5580841	59656514	5965651400	100	SRCD46C	WGS	RANDOM	GENOMIC	SINGLE	ILLUMINA	Illumina HiSeq 2000	PRJNA385500	SAMN06921508	SRCD46C	worker bee	Nature Reserve	2014	USA:CA,Stebbins Cold Cyn, Solano County, replicate 2	whole body	NA	NA	female	adult	NA	NA	adult	female	whole body		NA	NA	USA	Negative	0	0	0	0	0	4	0
SRR5580804	58964815	5896481500	100	SRCD51B	WGS	RANDOM	GENOMIC	SINGLE	ILLUMINA	Illumina HiSeq 2000	PRJNA385500	SAMN06921473	SRCD51B	worker bee	San Jacinto Mountains	2014	USA:CA, Riverside Co. San Jacinto Mnt. Idyllwild, Roadside corner Hwy 243 ad Marion Ridge Dr. next to Fire Station, replicate 4	whole body	NA	NA	female	adult	NA	NA	adult	female	whole body		NA	NA	USA	Negative	0	0	0	0	0	2	3
SRR5580847	57897993	5789799300	100	SRCD50B	WGS	RANDOM	GENOMIC	SINGLE	ILLUMINA	Illumina HiSeq 2000	PRJNA385500	SAMN06921497	SRCD50B	worker bee	Campus Garden	2014	USA:CA, Yolo County, University of California, Davis, replicate 3 modern	whole body	NA	NA	female	adult	NA	NA	adult	female	whole body		NA	NA	USA	Negative	0	0	0	0	0	11	0
SRR5580842	55696726	5569672600	100	SRCD45C	WGS	RANDOM	GENOMIC	SINGLE	ILLUMINA	Illumina HiSeq 2000	PRJNA385500	SAMN06921507	SRCD45C	worker bee	Nature Reserve	2014	USA:CA,Stebbins Cold Cyn, Solano County, replicate 1	whole body	NA	NA	female	adult	NA	NA	adult	female	whole body		NA	NA	USA	Negative	0	0	0	0	0	6	0
SRR5580844	52449756	5244975600	100	SRCD50C	WGS	RANDOM	GENOMIC	SINGLE	ILLUMINA	Illumina HiSeq 2000	PRJNA385500	SAMN06921498	SRCD50C	worker bee	Campus Garden	2014	USA:CA, Yolo County, University of California, Davis, replicate 4 modern	whole body	NA	NA	female	adult	NA	NA	adult	female	whole body		NA	NA	USA	Negative	0	0	0	0	0	4	0
SRR5580792	52358914	5235891400	100	SRCD9B	WGS	RANDOM	GENOMIC	SINGLE	ILLUMINA	Illumina HiSeq 2000	PRJNA385500	SAMN06921460	SRCD9B	worker bee	Catalina Island	2014	USA:CA, Los Angeles Co., Catalina Is. Avalon; 236 Catalina Ave, replicate 2	whole body	NA	NA	female	adult	NA	NA	adult	female	whole body		NA	NA	USA	Negative	0	0	0	0	0	18	5
SRR5580840	51853462	5185346200	100	SRCD48A	WGS	RANDOM	GENOMIC	SINGLE	ILLUMINA	Illumina HiSeq 2000	PRJNA385500	SAMN06921509	SRCD48A	worker bee	Nature Reserve	2014	USA:CA,Stebbins Cold Cyn, Solano County, replicate 3	whole body	NA	NA	female	adult	NA	NA	adult	female	whole body		NA	NA	USA	Negative	0	0	0	0	0	8	0
SRR5580837	51519569	5151956900	100	SRCD8B	WGS	RANDOM	GENOMIC	SINGLE	ILLUMINA	Illumina HiSeq 2000	PRJNA385500	SAMN06921494	SRCD8B	worker bee	University Campus	1968	USA:CA, Yolo County, University of California, Davis, replicate 1	whole body	NA	NA	female	adult	NA	NA	adult	female	whole body		NA	NA	USA	Negative	0	0	0	0	0	9	0
SRR5580832	51311123	5131112300	100	SRCD50A	WGS	RANDOM	GENOMIC	SINGLE	ILLUMINA	Illumina HiSeq 2000	PRJNA385500	SAMN06921491	SRCD50A	worker bee	Stanislaus County	2014	USA:CA, Stanislaus County, replicate 5	whole body	NA	NA	female	adult	NA	NA	adult	female	whole body		NA	NA	USA	Negative	0	0	0	0	0	17	0
SRR5580856	47517292	4751729200	100	ap22_rep2	WGS	RANDOM	GENOMIC	SINGLE	ILLUMINA	Illumina HiSeq 2000	PRJNA385500	SAMN06921438	SRCD5B	worker bee	Blue Lake	1966	USA:CA, Humboldt Co., Blue lake, replicate 2A	whole body	NA	NA	female	adult	NA	NA	adult	female	whole body		NA	NA	USA	Negative	0	0	0	0	0	14	0
SRR5580793	45201399	4520139900	100	SRCD9C	WGS	RANDOM	GENOMIC	SINGLE	ILLUMINA	Illumina HiSeq 2000	PRJNA385500	SAMN06921461	SRCD9C	worker bee	Catalina Island	2014	USA:CA, Los Angeles Co., Catalina Is. Avalon; 236 Catalina Ave, replicate 3	whole body	NA	NA	female	adult	NA	NA	adult	female	whole body		NA	NA	USA	Negative	0	0	0	0	0	14	6
SRR8468979	45141164	13564086800	300	703506.Apis63.P19.TH	WGS	RANDOM	GENOMIC	PAIRED	ILLUMINA	Illumina HiSeq 4000	PRJNA507348	SAMN10784775	703506_Apis63_P19_TH	703506.Apis63.P19.TH	Beehive, offspring of a naturally mated Cape Honeybee queen from the Cape of Good Hope peninsula	2016	South Africa: Cape of Good Hope region	whole body	NA	NA	female	NA	NA	NA	NA	female	whole body		NA	NA	South Africa	Negative	0	0	0	0	0	24	93
SRR8468936	43075800	12944114610	300	704506.Apis64.P28.AR.core	WGS	RANDOM	GENOMIC	PAIRED	ILLUMINA	Illumina HiSeq 4000	PRJNA507348	SAMN10784734	704506_Apis64_P28_AR_core	704506.Apis64.P28.AR.core	Beehive, offspring of a naturally mated Cape Honeybee queen from the Cape of Good Hope peninsula	2016	South Africa: Cape of Good Hope region	whole body	NA	NA	female	NA	NA	NA	NA	female	whole body		NA	NA	South Africa	Negative	0	0	0	0	0	20	124
SRR5580812	41852676	4185267600	100	SRCD47A	WGS	RANDOM	GENOMIC	SINGLE	ILLUMINA	Illumina HiSeq 2000	PRJNA385500	SAMN06921476	SRCD47A	worker bee	Nature Preserve	2014	USA:CA, Riverside Co., NEAR 1000 Palms Oasis, in Sky Valley at 77810 Las Montanas Rd, Plam Desert 92211, replicate 2	whole body	NA	NA	female	adult	NA	NA	adult	female	whole body		NA	NA	USA	Negative	0	0	0	0	0	6	0
SRR8468928	41122656	12357933686	300	708506.Apis68.P05.AR	WGS	RANDOM	GENOMIC	PAIRED	ILLUMINA	Illumina HiSeq 4000	PRJNA507348	SAMN10784784	708506_Apis68_P05_AR	708506.Apis68.P05.AR	Beehive, offspring of a naturally mated Cape Honeybee queen from the Cape of Good Hope peninsula	2016	South Africa: Cape of Good Hope region	whole body	NA	NA	female	NA	NA	NA	NA	female	whole body		NA	NA	South Africa	Negative	0	0	0	0	0	5	140
SRR5580822	40918920	4091892000	100	SRCD55A	WGS	RANDOM	GENOMIC	SINGLE	ILLUMINA	Illumina HiSeq 2000	PRJNA385500	SAMN06921426	SRCD55A	drone	Apiary	2014	USA:CA, Glenn replicate 1	whole body	NA	NA	male	adult	NA	NA	adult	male	whole body		NA	NA	USA	Negative	0	0	0	0	0	26	0
SRR2157935	38903473	7780694600	200	R1	WGS	RANDOM	GENOMIC	PAIRED	ILLUMINA	Illumina HiSeq 2000	PRJNA292680	SAMN03983452	Recruit_1	R1	NA	2011	USA: University of Illinois Bee Research Facility, Urbana, IL	whole body	forager	NA	female	adult	NA	NA	adult	female	whole body		NA	NA	USA	Negative	0	0	0	0	0	2	0
SRR5580815	38902546	3890254600	100	ap52_rep1	WGS	RANDOM	GENOMIC	SINGLE	ILLUMINA	Illumina HiSeq 2000	PRJNA385500	SAMN06921479	ap52	worker bee	Nature Reserve	1996	USA:CA, Solano Co. Stebbins Cold Cyn. Reserve 38 30'N 122 08'W 11 km W. Winters, replicate 2	whole body	NA	NA	female	adult	NA	NA	adult	female	whole body		NA	NA	USA	Negative	0	0	0	0	0	48	0
SRR5580818	38640647	3864064700	100	SRCD55E	WGS	RANDOM	GENOMIC	SINGLE	ILLUMINA	Illumina HiSeq 2000	PRJNA385500	SAMN06921430	SRCD55E	drone	Apiary	2014	USA:CA, Dixon, Noble Apiaries, replicate 3	whole body	NA	NA	male	adult	NA	NA	adult	male	whole body		NA	NA	USA	Negative	0	0	0	0	0	50	0
SRR11038133	38397362	11596003324	302	HILO_Sx11	WGS	RANDOM PCR	GENOMIC	PAIRED	ILLUMINA	Illumina HiSeq 4000	PRJNA605407	SAMN14056814	Hilo12	Honey Bee	Colony	2019-11	USA:Louisiana	Whole body	NA	NA	female	NA	NA	NA	NA	female	whole body		NA	NA	USA	Negative	0	0	0	0	0	110	13
SRR5580824	38383085	3838308500	100	SRC55C	WGS	RANDOM	GENOMIC	SINGLE	ILLUMINA	Illumina HiSeq 2000	PRJNA385500	SAMN06921428	SRCD55C	drone	Apiary	2014	USA:CA, Dixon, Noble Apiaries, replicate 1	whole body	NA	NA	male	adult	NA	NA	adult	male	whole body		NA	NA	USA	Negative	0	0	0	0	0	33	0
SRR5580839	38041488	3804148800	100	SRCD48B	WGS	RANDOM	GENOMIC	SINGLE	ILLUMINA	Illumina HiSeq 2000	PRJNA385500	SAMN06921510	SRCD48B	worker bee	Nature Reserve	2014	USA:CA,Stebbins Cold Cyn, Solano County, replicate 4	whole body	NA	NA	female	adult	NA	NA	adult	female	whole body		NA	NA	USA	Negative	0	0	0	0	0	10	0
SRR11038086	37460211	11312983722	302	HILO_Sx04	WGS	RANDOM PCR	GENOMIC	PAIRED	ILLUMINA	Illumina HiSeq 4000	PRJNA605407	SAMN14056813	Hilo11	Honey Bee	Colony	2019-11	USA:Louisiana	Whole body	NA	NA	female	NA	NA	NA	NA	female	whole body		NA	NA	USA	Negative	0	0	0	0	0	161	0
SRR2157941	36909173	7160379562	194	Recruit_7	WGS	RANDOM	GENOMIC	PAIRED	ILLUMINA	Illumina HiSeq 2000	PRJNA292680	SAMN03983458	Recruit_7	R7	NA	2011	USA: University of Illinois Bee Research Facility, Urbana, IL	whole body	forager	NA	female	adult	NA	NA	adult	female	whole body		NA	NA	USA	Negative	0	0	0	0	0	49	0
SRR8468931	36356343	10925117832	300	702506.Apis62.P35.AR.core	WGS	RANDOM	GENOMIC	PAIRED	ILLUMINA	Illumina HiSeq 4000	PRJNA507348	SAMN10784730	702506_Apis62_P35_AR_core	702506.Apis62.P35.AR.core	Beehive, offspring of a naturally mated Cape Honeybee queen from the Cape of Good Hope peninsula	2016	South Africa: Cape of Good Hope region	whole body	NA	NA	female	NA	NA	NA	NA	female	whole body		NA	NA	South Africa	Negative	0	0	0	0	0	65	60
SRR8468967	35858217	10764764296	300	708504.Apis44.P12.TH	WGS	RANDOM	GENOMIC	PAIRED	ILLUMINA	Illumina HiSeq 4000	PRJNA507348	SAMN10784783	708504_Apis44_P12_TH	708504.Apis44.P12.TH	Beehive, offspring of a naturally mated Cape Honeybee queen from the Cape of Good Hope peninsula	2016	South Africa: Cape of Good Hope region	whole body	NA	NA	female	NA	NA	NA	NA	female	whole body		NA	NA	South Africa	Negative	0	0	0	0	0	23	116
SRR8468986	34331028	10308880586	300	710502.Apis22.P18.AR	WGS	RANDOM	GENOMIC	PAIRED	ILLUMINA	Illumina HiSeq 4000	PRJNA507348	SAMN10784788	710502_Apis22_P18_AR	710502.Apis22.P18.AR	Beehive, offspring of a naturally mated Cape Honeybee queen from the Cape of Good Hope peninsula	2016	South Africa: Cape of Good Hope region	whole body	NA	NA	female	NA	NA	NA	NA	female	whole body		NA	NA	South Africa	Negative	0	0	0	0	0	28	74
SRR11038123	34045436	10281721672	302	Sample 7	WGS	RANDOM PCR	GENOMIC	PAIRED	ILLUMINA	Illumina HiSeq 4000	PRJNA605407	SAMN14056725	Carniolan17	Honey Bee	Colony	2018-03	USA:Louisiana	Whole body	NA	NA	female	NA	NA	NA	NA	female	whole body		NA	NA	USA	Negative	0	0	0	0	0	127	4
SRR11038145	34007971	10211254379	300	Sample 8	WGS	RANDOM PCR	GENOMIC	PAIRED	ILLUMINA	Illumina HiSeq 4000	PRJNA605407	SAMN14056726	Carniolan20	Honey Bee	Colony	2018-03	USA:Louisiana	Whole body	NA	NA	female	NA	NA	NA	NA	female	whole body		NA	NA	USA	Negative	0	0	0	0	0	127	4
SRR8468952	33460372	10054894002	300	706506.Apis66.P23.TH.core-extended	WGS	RANDOM	GENOMIC	PAIRED	ILLUMINA	Illumina HiSeq 4000	PRJNA507348	SAMN10784759	706506_Apis66_P23_TH_core-extended	706506.Apis66.P23.TH.core-extended	Beehive, offspring of a naturally mated Cape Honeybee queen from the Cape of Good Hope peninsula	2016	South Africa: Cape of Good Hope region	whole body	NA	NA	female	NA	NA	NA	NA	female	whole body		NA	NA	South Africa	Negative	0	0	0	0	0	68	88
SRR11038152	32882083	9930389066	302	Sample 50	WGS	RANDOM PCR	GENOMIC	PAIRED	ILLUMINA	Illumina HiSeq 4000	PRJNA605407	SAMN14056768	Pol2	Honey Bee	Colony	2018-03	USA:Louisiana	Whole body	NA	NA	female	NA	NA	NA	NA	female	whole body		NA	NA	USA	Negative	0	0	0	0	0	146	4
SRR2163210	31915713	6191648322	194	Scout_14	WGS	RANDOM	GENOMIC	PAIRED	ILLUMINA	Illumina HiSeq 2000	PRJNA292680	SAMN03983487	Scout_14	S14	NA	2011	USA: University of Illinois Bee Research Facility, Urbana, IL	whole body	forager	NA	female	adult	NA	NA	adult	female	whole body		NA	NA	USA	Negative	0	0	0	0	0	14	0
SRR11038093	31758892	9591185384	302	HILO_Hu24	WGS	RANDOM PCR	GENOMIC	PAIRED	ILLUMINA	Illumina HiSeq 4000	PRJNA605407	SAMN14056807	Hilo5	Honey Bee	Colony	2019-11	USA:Louisiana	Whole body	NA	NA	female	NA	NA	NA	NA	female	whole body		NA	NA	USA	Negative	0	0	0	0	0	120	10
SRR5580779	31063123	3106312300	100	ap36_rep1	WGS	RANDOM	GENOMIC	SINGLE	ILLUMINA	Illumina HiSeq 2000	PRJNA385500	SAMN06921454	ap36	worker bee	Coastal Sage	2002	USA:CA, LA Co. San Pedro, replicate 2	whole body	NA	NA	female	adult	NA	NA	adult	female	whole body		NA	NA	USA	Negative	0	0	0	0	0	5	16
SRR11038094	30647150	9255439300	302	HILO_Hu18	WGS	RANDOM PCR	GENOMIC	PAIRED	ILLUMINA	Illumina HiSeq 4000	PRJNA605407	SAMN14056806	Hilo4	Honey Bee	Colony	2019-11	USA:Louisiana	Whole body	NA	NA	female	NA	NA	NA	NA	female	whole body		NA	NA	USA	Negative	0	0	0	0	0	124	9
SRR11038153	30644599	9254668898	302	Sample 49	WGS	RANDOM PCR	GENOMIC	PAIRED	ILLUMINA	Illumina HiSeq 4000	PRJNA605407	SAMN14056767	Pol1	Honey Bee	Colony	2018-03	USA:Louisiana	Whole body	NA	NA	female	NA	NA	NA	NA	female	whole body		NA	NA	USA	Negative	0	0	0	0	0	173	5
SRR11038097	30573564	9233216328	302	HILO_Hu04	WGS	RANDOM PCR	GENOMIC	PAIRED	ILLUMINA	Illumina HiSeq 4000	PRJNA605407	SAMN14056803	Hilo1	Honey Bee	Colony	2019-11	USA:Louisiana	Whole body	NA	NA	female	NA	NA	NA	NA	female	whole body		NA	NA	USA	Negative	0	0	0	0	0	131	0
SRR11038126	30372105	9172375710	302	Sample 58	WGS	RANDOM PCR	GENOMIC	PAIRED	ILLUMINA	Illumina HiSeq 4000	PRJNA605407	SAMN14056776	Pol10	Honey Bee	Colony	2018-03	USA:Louisiana	Whole body	NA	NA	female	NA	NA	NA	NA	female	whole body		NA	NA	USA	Negative	0	0	0	0	0	127	0
SRR10312486	30113313	8978906783	298	Apis_capensis_clone_2016_3	WGS	RANDOM	GENOMIC	PAIRED	ILLUMINA	Illumina HiSeq 4000	PRJNA507349	SAMN13057259	Apis_capensis_clone_2016_3	2016_individual3	Apis scutellata beehives in Pretoria region	2016	South Africa: Gauteng, Pretoria	whole body	NA	NA	female	NA	NA	NA	NA	female	whole body		NA	NA	South Africa	Negative	0	0	0	0	0	173	93
SRR11038161	29871922	9021320444	302	Sample 41	WGS	RANDOM PCR	GENOMIC	PAIRED	ILLUMINA	Illumina HiSeq 4000	PRJNA605407	SAMN14056759	MNHyg5	Honey Bee	Colony	2018-03	USA:Louisiana	Whole body	NA	NA	female	NA	NA	NA	NA	female	whole body		NA	NA	USA	Negative	0	0	0	0	0	156	0
SRR5580814	29826087	2982608700	100	ap51_rep1	WGS	RANDOM	GENOMIC	SINGLE	ILLUMINA	Illumina HiSeq 2000	PRJNA385500	SAMN06921478	ap51	worker bee	Nature Reserve	1996	USA:CA, Solano Co. Stebbins Cold Cyn. Reserve 38 30'N 122 08'W 11 km W. Winters, replicate 1	whole body	NA	NA	female	adult	NA	NA	adult	female	whole body		NA	NA	USA	Negative	0	0	0	0	0	33	0
SRR11038127	29253494	8834555188	302	Sample 57	WGS	RANDOM PCR	GENOMIC	PAIRED	ILLUMINA	Illumina HiSeq 4000	PRJNA605407	SAMN14056775	Pol9	Honey Bee	Colony	2018-03	USA:Louisiana	Whole body	NA	NA	female	NA	NA	NA	NA	female	whole body		NA	NA	USA	Negative	0	0	0	0	0	142	4
SRR5580799	29017841	2901784100	100	SRCD51C	WGS	RANDOM	GENOMIC	SINGLE	ILLUMINA	Illumina HiSeq 2000	PRJNA385500	SAMN06921474	SRCD51C	worker bee	San Jacinto Mountains	2014	USA:CA, Riverside Co. San Jacinto Mnt. Idyllwild, Roadside corner Hwy 243 ad Marion Ridge Dr. next to Fire Station, replicate 5	whole body	NA	NA	female	adult	NA	NA	adult	female	whole body		NA	NA	USA	Negative	0	0	0	0	0	5	2
SRR8468938	29014397	8712757374	300	707502.Apis19.P23.TH	WGS	RANDOM	GENOMIC	PAIRED	ILLUMINA	Illumina HiSeq 4000	PRJNA507348	SAMN10784781	707502_Apis19_P23_TH	707502.Apis19.P23.TH	Beehive, offspring of a naturally mated Cape Honeybee queen from the Cape of Good Hope peninsula	2016	South Africa: Cape of Good Hope region	whole body	NA	NA	female	NA	NA	NA	NA	female	whole body		NA	NA	South Africa	Negative	0	0	0	0	0	77	97
SRR8468966	28698090	8619136032	300	711502.Apis23.P32.TH.core-extended	WGS	RANDOM	GENOMIC	PAIRED	ILLUMINA	Illumina HiSeq 4000	PRJNA507348	SAMN10784766	711502_Apis23_P32_TH_core-extended	711502.Apis23.P32.TH.core-extended	Beehive, offspring of a naturally mated Cape Honeybee queen from the Cape of Good Hope peninsula	2016	South Africa: Cape of Good Hope region	whole body	NA	NA	female	NA	NA	NA	NA	female	whole body		NA	NA	South Africa	Negative	0	0	0	0	0	29	109
SRR2157959	28594998	5547429612	194	Recruit_17	WGS	RANDOM	GENOMIC	PAIRED	ILLUMINA	Illumina HiSeq 2000	PRJNA292680	SAMN03983468	Recruit_17	R17	NA	2011	USA: University of Illinois Bee Research Facility, Urbana, IL	whole body	forager	NA	female	adult	NA	NA	adult	female	whole body		NA	NA	USA	Negative	0	0	0	0	0	18	0
SRR11038151	28293718	8544702836	302	Sample 6	WGS	RANDOM PCR	GENOMIC	PAIRED	ILLUMINA	Illumina HiSeq 4000	PRJNA605407	SAMN14056724	Carniolan16	Honey Bee	Colony	2018-03	USA:Louisiana	Whole body	NA	NA	female	NA	NA	NA	NA	female	whole body		NA	NA	USA	Negative	0	0	0	0	0	135	0
SRR11038125	28220622	8522627844	302	Sample 59	WGS	RANDOM PCR	GENOMIC	PAIRED	ILLUMINA	Illumina HiSeq 4000	PRJNA605407	SAMN14056777	Pol11	Honey Bee	Colony	2018-03	USA:Louisiana	Whole body	NA	NA	female	NA	NA	NA	NA	female	whole body		NA	NA	USA	Negative	0	0	0	0	0	129	15
SRR2157937	27954419	5423157286	194	Recruit_3	WGS	RANDOM	GENOMIC	PAIRED	ILLUMINA	Illumina HiSeq 2000	PRJNA292680	SAMN03983454	Recruit_3	R3	NA	2011	USA: University of Illinois Bee Research Facility, Urbana, IL	whole body	forager	NA	female	adult	NA	NA	adult	female	whole body		NA	NA	USA	Negative	0	0	0	0	0	40	0
SRR11038098	27629072	8343979744	302	Sample 84	WGS	RANDOM PCR	GENOMIC	PAIRED	ILLUMINA	Illumina HiSeq 4000	PRJNA605407	SAMN14056802	Italian3_12	Honey Bee	Colony	2018-03	USA:Louisiana	Whole body	NA	NA	female	NA	NA	NA	NA	female	whole body		NA	NA	USA	Negative	0	0	0	0	0	89	0
SRR11038132	27392050	8272399100	302	Sample 52	WGS	RANDOM PCR	GENOMIC	PAIRED	ILLUMINA	Illumina HiSeq 4000	PRJNA605407	SAMN14056770	Pol4	Honey Bee	Colony	2018-03	USA:Louisiana	Whole body	NA	NA	female	NA	NA	NA	NA	female	whole body		NA	NA	USA	Negative	0	0	0	0	0	142	0
SRR11038124	26972152	8145589904	302	Sample 60	WGS	RANDOM PCR	GENOMIC	PAIRED	ILLUMINA	Illumina HiSeq 4000	PRJNA605407	SAMN14056778	Pol12	Honey Bee	Colony	2018-03	USA:Louisiana	Whole body	NA	NA	female	NA	NA	NA	NA	female	whole body		NA	NA	USA	Negative	0	0	0	0	0	152	3
SRR8468933	26848207	8062947632	300	701504.Apis37.P14.AR.core	WGS	RANDOM	GENOMIC	PAIRED	ILLUMINA	Illumina HiSeq 4000	PRJNA507348	SAMN10784728	701504_Apis37_P14_AR_core	701504.Apis37.P14.AR.core	Beehive, offspring of a naturally mated Cape Honeybee queen from the Cape of Good Hope peninsula	2016	South Africa: Cape of Good Hope region	whole body	NA	NA	female	NA	NA	NA	NA	female	whole body		NA	NA	South Africa	Negative	0	0	0	0	0	0	74
SRR8468953	26741613	8028077478	300	704502.Apis16.P08.AR.core-extended	WGS	RANDOM	GENOMIC	PAIRED	ILLUMINA	Illumina HiSeq 4000	PRJNA507348	SAMN10784758	704502_Apis16_P08_AR_core-extended	704502.Apis16.P08.AR.core-extended	Beehive, offspring of a naturally mated Cape Honeybee queen from the Cape of Good Hope peninsula	2016	South Africa: Cape of Good Hope region	whole body	NA	NA	female	NA	NA	NA	NA	female	whole body		NA	NA	South Africa	Negative	0	0	0	0	0	59	76
SRR8468981	26523407	7963080282	300	702504.Apis38.P02.TH	WGS	RANDOM	GENOMIC	PAIRED	ILLUMINA	Illumina HiSeq 4000	PRJNA507348	SAMN10784773	702504_Apis38_P02_TH	702504.Apis38.P02.TH	Beehive, offspring of a naturally mated Cape Honeybee queen from the Cape of Good Hope peninsula	2016	South Africa: Cape of Good Hope region	whole body	NA	NA	female	NA	NA	NA	NA	female	whole body		NA	NA	South Africa	Negative	0	0	0	0	0	21	105
SRR2157962	26385642	5118814548	194	Recruit_20	WGS	RANDOM	GENOMIC	PAIRED	ILLUMINA	Illumina HiSeq 2000	PRJNA292680	SAMN03983471	Recruit_20	R20	NA	2011	USA: University of Illinois Bee Research Facility, Urbana, IL	whole body	forager	NA	female	adult	NA	NA	adult	female	whole body		NA	NA	USA	Negative	0	0	0	0	0	43	0
SRR11038089	26176501	7905303302	302	HILO_Sb34	WGS	RANDOM PCR	GENOMIC	PAIRED	ILLUMINA	Illumina HiSeq 4000	PRJNA605407	SAMN14056810	Hilo8	Honey Bee	Colony	2019-11	USA:Louisiana	Whole body	NA	NA	female	NA	NA	NA	NA	female	whole body		NA	NA	USA	Negative	0	0	0	0	0	186	0
SRR11038131	25658560	7748885120	302	Sample 53	WGS	RANDOM PCR	GENOMIC	PAIRED	ILLUMINA	Illumina HiSeq 4000	PRJNA605407	SAMN14056771	Pol5	Honey Bee	Colony	2018-03	USA:Louisiana	Whole body	NA	NA	female	NA	NA	NA	NA	female	whole body		NA	NA	USA	Negative	0	0	0	0	0	155	5
SRR5580808	25509074	2550907400	100	ap53_rep1	WGS	RANDOM	GENOMIC	SINGLE	ILLUMINA	Illumina HiSeq 2000	PRJNA385500	SAMN06921480	ap53	worker bee	Nature Reserve	1996	USA:CA, Solano Co. Stebbins Cold Cyn. Reserve 38 30'N 122 08'W 11 km W. Winters, replicate 3	whole body	NA	NA	female	adult	NA	NA	adult	female	whole body		NA	NA	USA	Negative	0	0	0	0	0	45	0
SRR11038128	25498388	7700513176	302	Sample 56	WGS	RANDOM PCR	GENOMIC	PAIRED	ILLUMINA	Illumina HiSeq 4000	PRJNA605407	SAMN14056774	Pol8	Honey Bee	Colony	2018-03	USA:Louisiana	Whole body	NA	NA	female	NA	NA	NA	NA	female	whole body		NA	NA	USA	Negative	0	0	0	0	0	149	0
SRR11038120	25242039	7623095778	302	Sample 64	WGS	RANDOM PCR	GENOMIC	PAIRED	ILLUMINA	Illumina HiSeq 4000	PRJNA605407	SAMN14056782	Russian4	Honey Bee	Colony	2018-03	USA:Louisiana	Whole body	NA	NA	female	NA	NA	NA	NA	female	whole body		NA	NA	USA	Negative	0	0	0	0	0	155	0
SRR2163212	25184617	4885815698	194	Scout_15	WGS	RANDOM	GENOMIC	PAIRED	ILLUMINA	Illumina HiSeq 2000	PRJNA292680	SAMN03983488	Scout_15	S15	NA	2011	USA: University of Illinois Bee Research Facility, Urbana, IL	whole body	forager	NA	female	adult	NA	NA	adult	female	whole body		NA	NA	USA	Negative	0	0	0	0	0	13	0
SRR8468969	24964909	7496509490	300	709504.Apis45.P28.TH	WGS	RANDOM	GENOMIC	PAIRED	ILLUMINA	Illumina HiSeq 4000	PRJNA507348	SAMN10784787	709504_Apis45_P28_TH	709504.Apis45.P28.TH	Beehive, offspring of a naturally mated Cape Honeybee queen from the Cape of Good Hope peninsula	2016	South Africa: Cape of Good Hope region	whole body	NA	NA	female	NA	NA	NA	NA	female	whole body		NA	NA	South Africa	Negative	0	0	0	0	0	38	149
SRR11038087	24929653	7528755206	302	HILO_Sx01	WGS	RANDOM PCR	GENOMIC	PAIRED	ILLUMINA	Illumina HiSeq 4000	PRJNA605407	SAMN14056812	Hilo10	Honey Bee	Colony	2019-11	USA:Louisiana	Whole body	NA	NA	female	NA	NA	NA	NA	female	whole body		NA	NA	USA	Negative	0	0	0	0	0	96	0
SRR5580817	24858851	1889272676	76	ap05_rep1	WGS	RANDOM	GENOMIC	SINGLE	ILLUMINA	Illumina HiSeq 2000	PRJNA385500	SAMN06921485	ap05	worker bee	Stanislaus County	1976	USA:CA, Stanislaus Co. PG&amp;E Power plant, 5 miles N of Turlock Lake NW of LaGrange, replicate 1	whole body	NA	NA	female	adult	NA	NA	adult	female	whole body		NA	NA	USA	Negative	0	0	0	0	0	25	0
SRR11038158	24782562	7484333724	302	Sample 44	WGS	RANDOM PCR	GENOMIC	PAIRED	ILLUMINA	Illumina HiSeq 4000	PRJNA605407	SAMN14056762	MNHyg8	Honey Bee	Colony	2018-03	USA:Louisiana	Whole body	NA	NA	female	NA	NA	NA	NA	female	whole body		NA	NA	USA	Negative	0	0	0	0	0	134	7
SRR2157960	24686144	4789111936	194	Recruit_18	WGS	RANDOM	GENOMIC	PAIRED	ILLUMINA	Illumina HiSeq 2000	PRJNA292680	SAMN03983469	Recruit_18	R18	NA	2011	USA: University of Illinois Bee Research Facility, Urbana, IL	whole body	forager	NA	female	adult	NA	NA	adult	female	whole body		NA	NA	USA	Negative	0	0	0	0	0	23	0
SRR2157936	24399618	4879923600	200	R2	WGS	RANDOM	GENOMIC	PAIRED	ILLUMINA	Illumina HiSeq 2000	PRJNA292680	SAMN03983453	Recruit_2	R2	NA	2011	USA: University of Illinois Bee Research Facility, Urbana, IL	whole body	forager	NA	female	adult	NA	NA	adult	female	whole body		NA	NA	USA	Negative	0	0	0	0	0	2	0
SRR2163122	24243389	4703217466	194	Scout_3	WGS	RANDOM	GENOMIC	PAIRED	ILLUMINA	Illumina HiSeq 2000	PRJNA292680	SAMN03983476	Scout_3	S3	NA	2011	USA: University of Illinois Bee Research Facility, Urbana, IL	whole body	forager	NA	female	adult	NA	NA	adult	female	whole body		NA	NA	USA	Negative	0	0	0	0	0	8	0
SRR5580838	24050609	2405060900	100	SRCD48C	WGS	RANDOM	GENOMIC	SINGLE	ILLUMINA	Illumina HiSeq 2000	PRJNA385500	SAMN06921511	SRCD48C	worker bee	Nature Reserve	2014	USA:CA,Stebbins Cold Cyn, Solano County, replicate 5	whole body	NA	NA	female	adult	NA	NA	adult	female	whole body		NA	NA	USA	Negative	0	0	0	0	0	3	5
SRR11038130	24034525	7258426550	302	Sample 54	WGS	RANDOM PCR	GENOMIC	PAIRED	ILLUMINA	Illumina HiSeq 4000	PRJNA605407	SAMN14056772	Pol6	Honey Bee	Colony	2018-03	USA:Louisiana	Whole body	NA	NA	female	NA	NA	NA	NA	female	whole body		NA	NA	USA	Negative	0	0	0	0	0	143	0
SRR2163174	23819659	4621013846	194	Scout_4	WGS	RANDOM	GENOMIC	PAIRED	ILLUMINA	Illumina HiSeq 2000	PRJNA292680	SAMN03983477	Scout_4	S4	NA	2011	USA: University of Illinois Bee Research Facility, Urbana, IL	whole body	forager	NA	female	adult	NA	NA	adult	female	whole body		NA	NA	USA	Negative	0	0	0	0	0	5	0
SRR8468988	23743643	7134584152	300	710504.Apis46.P28.AR	WGS	RANDOM	GENOMIC	PAIRED	ILLUMINA	Illumina HiSeq 4000	PRJNA507348	SAMN10784790	710504_Apis46_P28_AR	710504.Apis46.P28.AR	Beehive, offspring of a naturally mated Cape Honeybee queen from the Cape of Good Hope peninsula	2016	South Africa: Cape of Good Hope region	whole body	NA	NA	female	NA	NA	NA	NA	female	whole body		NA	NA	South Africa	Negative	0	0	0	0	0	28	64
SRR2157953	23327610	4525556340	194	Recruit_14	WGS	RANDOM	GENOMIC	PAIRED	ILLUMINA	Illumina HiSeq 2000	PRJNA292680	SAMN03983465	Recruit_14	R14	NA	2011	USA: University of Illinois Bee Research Facility, Urbana, IL	whole body	forager	NA	female	adult	NA	NA	adult	female	whole body		NA	NA	USA	Negative	0	0	0	0	0	16	0
SRR8468935	23215298	6969634458	300	704504.Apis40.P29.AR.core	WGS	RANDOM	GENOMIC	PAIRED	ILLUMINA	Illumina HiSeq 4000	PRJNA507348	SAMN10784733	704504_Apis40_P29_AR_core	704504.Apis40.P29.AR.core	Beehive, offspring of a naturally mated Cape Honeybee queen from the Cape of Good Hope peninsula	2016	South Africa: Cape of Good Hope region	whole body	NA	NA	female	NA	NA	NA	NA	female	whole body		NA	NA	South Africa	Negative	0	0	0	0	0	20	81
SRR8468962	23208519	6968958654	300	706502.Apis18.P04.AR	WGS	RANDOM	GENOMIC	PAIRED	ILLUMINA	Illumina HiSeq 4000	PRJNA507348	SAMN10784779	706502_Apis18_P04_AR	706502.Apis18.P04.AR	Beehive, offspring of a naturally mated Cape Honeybee queen from the Cape of Good Hope peninsula	2016	South Africa: Cape of Good Hope region	whole body	NA	NA	female	NA	NA	NA	NA	female	whole body		NA	NA	South Africa	Negative	0	0	0	0	0	31	72
SRR2163214	23157475	4492550150	194	Scout_18	WGS	RANDOM	GENOMIC	PAIRED	ILLUMINA	Illumina HiSeq 2000	PRJNA292680	SAMN03983491	Scout_18	S18	NA	2011	USA: University of Illinois Bee Research Facility, Urbana, IL	whole body	forager	NA	female	adult	NA	NA	adult	female	whole body		NA	NA	USA	Negative	0	0	0	0	0	23	0
SRR11038129	23152337	6992005774	302	Sample 55	WGS	RANDOM PCR	GENOMIC	PAIRED	ILLUMINA	Illumina HiSeq 4000	PRJNA605407	SAMN14056773	Pol7	Honey Bee	Colony	2018-03	USA:Louisiana	Whole body	NA	NA	female	NA	NA	NA	NA	female	whole body		NA	NA	USA	Negative	0	0	0	0	0	158	0
SRR11038119	23111428	6979651256	302	Sample 65	WGS	RANDOM PCR	GENOMIC	PAIRED	ILLUMINA	Illumina HiSeq 4000	PRJNA605407	SAMN14056783	Russian5	Honey Bee	Colony	2018-03	USA:Louisiana	Whole body	NA	NA	female	NA	NA	NA	NA	female	whole body		NA	NA	USA	Negative	0	0	0	0	0	161	6
SRR5580825	22572756	2257275600	100	SRCD55D	WGS	RANDOM	GENOMIC	SINGLE	ILLUMINA	Illumina HiSeq 2000	PRJNA385500	SAMN06921429	SRCD55D	drone	Apiary	2014	USA:CA, Dixon, Noble Apiaries, replicate 2	whole body	NA	NA	male	adult	NA	NA	adult	male	whole body		NA	NA	USA	Negative	0	0	0	0	0	7	0
SRR2163213	22493353	4363710482	194	Scout_16	WGS	RANDOM	GENOMIC	PAIRED	ILLUMINA	Illumina HiSeq 2000	PRJNA292680	SAMN03983489	Scout_16	S16	NA	2011	USA: University of Illinois Bee Research Facility, Urbana, IL	whole body	forager	NA	female	adult	NA	NA	adult	female	whole body		NA	NA	USA	Negative	0	0	0	0	0	23	0
SRR2163224	22464743	4358160142	194	Scout_17	WGS	RANDOM	GENOMIC	PAIRED	ILLUMINA	Illumina HiSeq 2000	PRJNA292680	SAMN03983490	Scout_17	S17	NA	2011	USA: University of Illinois Bee Research Facility, Urbana, IL	whole body	forager	NA	female	adult	NA	NA	adult	female	whole body		NA	NA	USA	Negative	0	0	0	0	0	14	0
SRR8468984	22308518	6703849244	300	712504.Apis48.P06.AR.core-extended	WGS	RANDOM	GENOMIC	PAIRED	ILLUMINA	Illumina HiSeq 4000	PRJNA507348	SAMN10784768	712504_Apis48_P06_AR_core-extended	712504.Apis48.P06.AR.core-extended	Beehive, offspring of a naturally mated Cape Honeybee queen from the Cape of Good Hope peninsula	2016	South Africa: Cape of Good Hope region	whole body	NA	NA	female	NA	NA	NA	NA	female	whole body		NA	NA	South Africa	Negative	0	0	0	0	0	34	114
SRR2163225	22248169	4316144786	194	Scout_19	WGS	RANDOM	GENOMIC	PAIRED	ILLUMINA	Illumina HiSeq 2000	PRJNA292680	SAMN03983492	Scout_19	S19	NA	2011	USA: University of Illinois Bee Research Facility, Urbana, IL	whole body	forager	NA	female	adult	NA	NA	adult	female	whole body		NA	NA	USA	Negative	0	0	0	0	0	20	0
SRR8468932	22189888	6668194404	300	701506.Apis61.P15.AR.core	WGS	RANDOM	GENOMIC	PAIRED	ILLUMINA	Illumina HiSeq 4000	PRJNA507348	SAMN10784729	701506_Apis61_P15_AR_core	701506.Apis61.P15.AR.core	Beehive, offspring of a naturally mated Cape Honeybee queen from the Cape of Good Hope peninsula	2016	South Africa: Cape of Good Hope region	whole body	NA	NA	female	NA	NA	NA	NA	female	whole body		NA	NA	South Africa	Negative	0	0	0	0	0	20	62
SRR11038122	22143745	6687410990	302	Sample 61	WGS	RANDOM PCR	GENOMIC	PAIRED	ILLUMINA	Illumina HiSeq 4000	PRJNA605407	SAMN14056779	Russian1	Honey Bee	Colony	2018-03	USA:Louisiana	Whole body	NA	NA	female	NA	NA	NA	NA	female	whole body		NA	NA	USA	Negative	0	0	0	0	0	142	0
SRR5580826	21868057	2186805700	100	ap30_rep1	WGS	RANDOM	GENOMIC	SINGLE	ILLUMINA	Illumina HiSeq 2000	PRJNA385500	SAMN06921434	ap30	worker bee	Blue Lake	1966	USA:CA, Humboldt Co., Blue lake, replicate 4	whole body	NA	NA	female	adult	NA	NA	adult	female	whole body		NA	NA	USA	Negative	0	0	0	0	0	57	0
SRR8468964	21717781	6520323416	300	708502.Apis20.P30.TH	WGS	RANDOM	GENOMIC	PAIRED	ILLUMINA	Illumina HiSeq 4000	PRJNA507348	SAMN10784782	708502_Apis20_P30_TH	708502.Apis20.P30.TH	Beehive, offspring of a naturally mated Cape Honeybee queen from the Cape of Good Hope peninsula	2016	South Africa: Cape of Good Hope region	whole body	NA	NA	female	NA	NA	NA	NA	female	whole body		NA	NA	South Africa	Negative	0	0	0	0	0	64	96
SRR8468968	21664036	6510246490	300	712502.Apis24.P28.AR.core-extended	WGS	RANDOM	GENOMIC	PAIRED	ILLUMINA	Illumina HiSeq 4000	PRJNA507348	SAMN10784797	712502_Apis24_P28_AR_core-extended	712502.Apis24.P28.AR.core-extended	Beehive, offspring of a naturally mated Cape Honeybee queen from the Cape of Good Hope peninsula	2016	South Africa: Cape of Good Hope region	whole body	NA	NA	female	NA	NA	NA	NA	female	whole body		NA	NA	South Africa	Negative	0	0	0	0	0	0	79
SRR8468951	21618220	6491176278	300	706504.Apis42.P24.TH.core	WGS	RANDOM	GENOMIC	PAIRED	ILLUMINA	Illumina HiSeq 4000	PRJNA507348	SAMN10784746	706504_Apis42_P24_TH_core	706504.Apis42.P24.TH.core	Beehive, offspring of a naturally mated Cape Honeybee queen from the Cape of Good Hope peninsula	2016	South Africa: Cape of Good Hope region	whole body	NA	NA	female	NA	NA	NA	NA	female	whole body		NA	NA	South Africa	Negative	0	0	0	0	0	0	202
SRR8468991	21230027	6377939052	300	711504.Apis47.P29.TH	WGS	RANDOM	GENOMIC	PAIRED	ILLUMINA	Illumina HiSeq 4000	PRJNA507348	SAMN10784793	711504_Apis47_P29_TH	711504.Apis47.P29.TH	Beehive, offspring of a naturally mated Cape Honeybee queen from the Cape of Good Hope peninsula	2016	South Africa: Cape of Good Hope region	whole body	NA	NA	female	NA	NA	NA	NA	female	whole body		NA	NA	South Africa	Negative	0	0	0	0	0	44	78
SRR8468948	20905231	6278346698	300	703504.Apis39.P09.TH.core	WGS	RANDOM	GENOMIC	PAIRED	ILLUMINA	Illumina HiSeq 4000	PRJNA507348	SAMN10784742	703504_Apis39_P09_TH_core	703504.Apis39.P09.TH.core	Beehive, offspring of a naturally mated Cape Honeybee queen from the Cape of Good Hope peninsula	2016	South Africa: Cape of Good Hope region	whole body	NA	NA	female	NA	NA	NA	NA	female	whole body		NA	NA	South Africa	Negative	0	0	0	0	0	2	102
SRR2163226	20857122	4046281668	194	Scout_20	WGS	RANDOM	GENOMIC	PAIRED	ILLUMINA	Illumina HiSeq 2000	PRJNA292680	SAMN03983493	Scout_20	S20	NA	2011	USA: University of Illinois Bee Research Facility, Urbana, IL	whole body	forager	NA	female	adult	NA	NA	adult	female	whole body		NA	NA	USA	Negative	0	0	0	0	0	23	0
SRR8468943	20840336	6259105710	300	707504.Apis43.P12.AR.core	WGS	RANDOM	GENOMIC	PAIRED	ILLUMINA	Illumina HiSeq 4000	PRJNA507348	SAMN10784739	707504_Apis43_P12_AR_core	707504.Apis43.P12.AR.core	Beehive, offspring of a naturally mated Cape Honeybee queen from the Cape of Good Hope peninsula	2016	South Africa: Cape of Good Hope region	whole body	NA	NA	female	NA	NA	NA	NA	female	whole body		NA	NA	South Africa	Negative	0	0	0	0	0	2	144
SRR8468995	20733422	6224922394	300	702502.Apis14.P07.TH	WGS	RANDOM	GENOMIC	PAIRED	ILLUMINA	Illumina HiSeq 4000	PRJNA507348	SAMN10784771	702502_Apis14_P07_TH	702502.Apis14.P07.TH	Beehive, offspring of a naturally mated Cape Honeybee queen from the Cape of Good Hope peninsula	2016	South Africa: Cape of Good Hope region	whole body	NA	NA	female	NA	NA	NA	NA	female	whole body		NA	NA	South Africa	Negative	0	0	0	0	0	0	107
SRR8468934	20496236	6153867358	300	705502.Apis17.P08.AR.core	WGS	RANDOM	GENOMIC	PAIRED	ILLUMINA	Illumina HiSeq 4000	PRJNA507348	SAMN10784735	705502_Apis17_P08_AR_core	705502.Apis17.P08.AR.core	Beehive, offspring of a naturally mated Cape Honeybee queen from the Cape of Good Hope peninsula	2016	South Africa: Cape of Good Hope region	whole body	NA	NA	female	NA	NA	NA	NA	female	whole body		NA	NA	South Africa	Negative	0	0	0	0	0	41	29
SRR2157948	20304071	3938989774	194	Recruit_12	WGS	RANDOM	GENOMIC	PAIRED	ILLUMINA	Illumina HiSeq 2000	PRJNA292680	SAMN03983463	Recruit_12	R12	NA	2011	USA: University of Illinois Bee Research Facility, Urbana, IL	whole body	forager	NA	female	adult	NA	NA	adult	female	whole body		NA	NA	USA	Negative	0	0	0	0	0	20	0
SRR2157964	20089743	3897410142	194	Recruit_22	WGS	RANDOM	GENOMIC	PAIRED	ILLUMINA	Illumina HiSeq 2000	PRJNA292680	SAMN03983473	Recruit_22	R22	NA	2011	USA: University of Illinois Bee Research Facility, Urbana, IL	whole body	forager	NA	female	adult	NA	NA	adult	female	whole body		NA	NA	USA	Negative	0	0	0	0	0	18	0
SRR2157938	18851149	3657122906	194	Recruit_4	WGS	RANDOM	GENOMIC	PAIRED	ILLUMINA	Illumina HiSeq 2000	PRJNA292680	SAMN03983455	Recruit_4	R4	NA	2011	USA: University of Illinois Bee Research Facility, Urbana, IL	whole body	forager	NA	female	adult	NA	NA	adult	female	whole body		NA	NA	USA	Negative	0	0	0	0	0	42	0
SRR8468939	18007632	5408060828	300	705504.Apis41.P21.AR.core	WGS	RANDOM	GENOMIC	PAIRED	ILLUMINA	Illumina HiSeq 4000	PRJNA507348	SAMN10784737	705504_Apis41_P21_AR_core	705504.Apis41.P21.AR.core	Beehive, offspring of a naturally mated Cape Honeybee queen from the Cape of Good Hope peninsula	2016	South Africa: Cape of Good Hope region	whole body	NA	NA	female	NA	NA	NA	NA	female	whole body		NA	NA	South Africa	Negative	0	0	0	0	0	0	110
SRR2157961	17679984	3429916896	194	Recruit_19	WGS	RANDOM	GENOMIC	PAIRED	ILLUMINA	Illumina HiSeq 2000	PRJNA292680	SAMN03983470	Recruit_19	R19	NA	2011	USA: University of Illinois Bee Research Facility, Urbana, IL	whole body	forager	NA	female	adult	NA	NA	adult	female	whole body		NA	NA	USA	Negative	0	0	0	0	0	12	0
SRR2163228	17500547	3395106118	194	Scout_22	WGS	RANDOM	GENOMIC	PAIRED	ILLUMINA	Illumina HiSeq 2000	PRJNA292680	SAMN03983495	Scout_22	S22	NA	2011	USA: University of Illinois Bee Research Facility, Urbana, IL	whole body	forager	NA	female	adult	NA	NA	adult	female	whole body		NA	NA	USA	Negative	0	0	0	0	0	16	0
SRR2157939	16506480	3202257120	194	Recruit_5	WGS	RANDOM	GENOMIC	PAIRED	ILLUMINA	Illumina HiSeq 2000	PRJNA292680	SAMN03983456	Recruit_5	R5	NA	2011	USA: University of Illinois Bee Research Facility, Urbana, IL	whole body	forager	NA	female	adult	NA	NA	adult	female	whole body		NA	NA	USA	Negative	0	0	0	0	0	49	0
SRR5580858	16268618	1626861800	100	ap30_rep2	WGS	RANDOM	GENOMIC	SINGLE	ILLUMINA	Illumina HiSeq 2000	PRJNA385500	SAMN06921440	SRCD52C	worker bee	Blue Lake	1966	USA:CA, Humboldt Co., Blue lake, replicate 4A	whole body	NA	NA	female	adult	NA	NA	adult	female	whole body		NA	NA	USA	Negative	0	0	0	0	0	17	0
SRR2163179	15299090	2968023460	194	Scout_8	WGS	RANDOM	GENOMIC	PAIRED	ILLUMINA	Illumina HiSeq 2000	PRJNA292680	SAMN03983481	Scout_8	S8	NA	2011	USA: University of Illinois Bee Research Facility, Urbana, IL	whole body	forager	NA	female	adult	NA	NA	adult	female	whole body		NA	NA	USA	Negative	0	0	0	0	0	7	0
SRR8468982	14761889	4432886976	300	703502.Apis15.P22.TH.core-extended	WGS	RANDOM	GENOMIC	PAIRED	ILLUMINA	Illumina HiSeq 4000	PRJNA507348	SAMN10784756	703502_Apis15_P22_TH_core-extended	703502.Apis15.P22.TH.core-extended	Beehive, offspring of a naturally mated Cape Honeybee queen from the Cape of Good Hope peninsula	2016	South Africa: Cape of Good Hope region	whole body	NA	NA	female	NA	NA	NA	NA	female	whole body		NA	NA	South Africa	Negative	0	0	0	0	0	46	119
SRR2157943	14682176	2848342144	194	Recruit_9	WGS	RANDOM	GENOMIC	PAIRED	ILLUMINA	Illumina HiSeq 2000	PRJNA292680	SAMN03983460	Recruit_9	R9	NA	2011	USA: University of Illinois Bee Research Facility, Urbana, IL	whole body	forager	NA	female	adult	NA	NA	adult	female	whole body		NA	NA	USA	Negative	0	0	0	0	0	19	0
SRR10055127	14026443	3534663636	252	Scu-D-2-2	WGS	RANDOM	GENOMIC	PAIRED	ILLUMINA	Illumina HiSeq 2500	PRJNA516678	SAMN12671533	scu_d_2_2	not applicable	not applicable	missing	South Africa	whole individual	larval/pupal	NA	male	NA	drone	NA	larval/pupal	male	whole body		NA	NA	South Africa	Negative	0	0	0	0	0	36	80
SRR2157954	13518134	2622517996	194	Recruit_15	WGS	RANDOM	GENOMIC	PAIRED	ILLUMINA	Illumina HiSeq 2000	PRJNA292680	SAMN03983466	Recruit_15	R15	NA	2011	USA: University of Illinois Bee Research Facility, Urbana, IL	whole body	forager	NA	female	adult	NA	NA	adult	female	whole body		NA	NA	USA	Negative	0	0	0	0	0	19	0
SRR2157945	13496545	2618329730	194	Recruit_10	WGS	RANDOM	GENOMIC	PAIRED	ILLUMINA	Illumina HiSeq 2000	PRJNA292680	SAMN03983461	Recruit_10	R10	NA	2011	USA: University of Illinois Bee Research Facility, Urbana, IL	whole body	forager	NA	female	adult	NA	NA	adult	female	whole body		NA	NA	USA	Negative	0	0	0	0	0	25	0
SRR10055129	13028055	3283069860	252	Scu-D-2-1	WGS	RANDOM	GENOMIC	PAIRED	ILLUMINA	Illumina HiSeq 2500	PRJNA516678	SAMN12671532	scu_d_2_1	not applicable	not applicable	missing	South Africa	whole individual	larval/pupal	NA	male	NA	drone	NA	larval/pupal	male	whole body		NA	NA	South Africa	Negative	0	0	0	0	0	0	82
SRR8468985	12769031	3833929422	300	701502.Apis13.P13.AR	WGS	RANDOM	GENOMIC	PAIRED	ILLUMINA	Illumina HiSeq 4000	PRJNA507348	SAMN10784769	701502_Apis13_P13_AR	701502.Apis13.P13.AR	Beehive, offspring of a naturally mated Cape Honeybee queen from the Cape of Good Hope peninsula	2016	South Africa: Cape of Good Hope region	whole body	NA	NA	female	NA	NA	NA	NA	female	whole body		NA	NA	South Africa	Negative	0	0	0	0	0	53	86
SRR5580794	12684101	1268410100	100	ap25_rep1	WGS	RANDOM	GENOMIC	SINGLE	ILLUMINA	Illumina HiSeq 2000	PRJNA385500	SAMN06921458	ap25	worker bee	Catalina Island	1910	USA:CA, Los Angeles Co., Catalina Is. Avalon, replicate 2	whole body	NA	NA	female	adult	NA	NA	adult	female	whole body		NA	NA	USA	Negative	0	0	0	0	0	50	0
SRR10055128	12629292	3182581584	252	Cap-SB-2-5	WGS	RANDOM	GENOMIC	PAIRED	ILLUMINA	Illumina HiSeq 2500	PRJNA516678	SAMN12671497	cap_sb_2_5	not applicable	not applicable	missing	South Africa	whole individual	larval/pupal	NA	male	NA	drone	NA	larval/pupal	male	whole body		NA	NA	South Africa	Negative	0	0	0	0	0	58	60
SRR10055137	12606318	3176792136	252	Scu-D-1-4	WGS	RANDOM	GENOMIC	PAIRED	ILLUMINA	Illumina HiSeq 2500	PRJNA516678	SAMN12671524	scu_d_1_4	not applicable	not applicable	missing	South Africa	whole individual	larval/pupal	NA	male	NA	drone	NA	larval/pupal	male	whole body		NA	NA	South Africa	Negative	0	0	0	0	0	10	134
SRR10055363	12492507	3148111764	252	Cap-SB-4-10	WGS	RANDOM	GENOMIC	PAIRED	ILLUMINA	Illumina HiSeq 2500	PRJNA516678	SAMN12671503	cap_sb_4_10	not applicable	not applicable	missing	South Africa	whole individual	larval/pupal	NA	male	NA	drone	NA	larval/pupal	male	whole body		NA	NA	South Africa	Negative	0	0	0	0	0	37	67
SRR8468992	12391143	3723400578	300	711506.Apis71.P25.AR	WGS	RANDOM	GENOMIC	PAIRED	ILLUMINA	Illumina HiSeq 4000	PRJNA507348	SAMN10784794	711506_Apis71_P25_AR	711506.Apis71.P25.AR	Beehive, offspring of a naturally mated Cape Honeybee queen from the Cape of Good Hope peninsula	2016	South Africa: Cape of Good Hope region	whole body	NA	NA	female	NA	NA	NA	NA	female	whole body		NA	NA	South Africa	Negative	0	0	0	0	0	89	77
SRR10055283	12281298	3094887096	252	Cap-SB-4-7	WGS	RANDOM	GENOMIC	PAIRED	ILLUMINA	Illumina HiSeq 2500	PRJNA516678	SAMN12671510	cap_sb_4_7	not applicable	not applicable	missing	South Africa	whole individual	larval/pupal	NA	male	NA	drone	NA	larval/pupal	male	whole body		NA	NA	South Africa	Negative	0	0	0	0	0	0	104
SRR2157963	11879237	2304571978	194	Recruit_21	WGS	RANDOM	GENOMIC	PAIRED	ILLUMINA	Illumina HiSeq 2000	PRJNA292680	SAMN03983472	Recruit_21	R21	NA	2011	USA: University of Illinois Bee Research Facility, Urbana, IL	whole body	forager	NA	female	adult	NA	NA	adult	female	whole body		NA	NA	USA	Negative	0	0	0	0	0	56	0
SRR10055141	11871399	2991592548	252	Scu-D-1-3	WGS	RANDOM	GENOMIC	PAIRED	ILLUMINA	Illumina HiSeq 2500	PRJNA516678	SAMN12671523	scu_d_1_3	not applicable	not applicable	missing	South Africa	whole individual	larval/pupal	NA	male	NA	drone	NA	larval/pupal	male	whole body		NA	NA	South Africa	Negative	0	0	0	0	0	133	31
SRR10055111	11751040	2937760000	250	Scu-LT-5-7	WGS	RANDOM	GENOMIC	PAIRED	ILLUMINA	Illumina HiSeq 2500	PRJNA516678	SAMN12671548	scu_lt_5_7	not applicable	not applicable	missing	South Africa	whole individual	larval/pupal	NA	male	NA	drone	NA	larval/pupal	male	whole body		NA	NA	South Africa	Negative	0	0	0	0	0	0	304
SRR10055121	11652556	2936444112	252	Scu-D-2-8	WGS	RANDOM	GENOMIC	PAIRED	ILLUMINA	Illumina HiSeq 2500	PRJNA516678	SAMN12671539	scu_d_2_8	not applicable	not applicable	missing	South Africa	whole individual	larval/pupal	NA	male	NA	drone	NA	larval/pupal	male	whole body		NA	NA	South Africa	Negative	0	0	0	0	0	30	73
SRR10055122	11096118	2796221736	252	Scu-D-2-6	WGS	RANDOM	GENOMIC	PAIRED	ILLUMINA	Illumina HiSeq 2500	PRJNA516678	SAMN12671537	scu_d_2_6	not applicable	not applicable	missing	South Africa	whole individual	larval/pupal	NA	male	NA	drone	NA	larval/pupal	male	whole body		NA	NA	South Africa	Negative	0	0	0	0	0	0	98
SRR10055383	10964990	2763177480	252	Cap-SB-2-9	WGS	RANDOM	GENOMIC	PAIRED	ILLUMINA	Illumina HiSeq 2500	PRJNA516678	SAMN12671501	cap_sb_2_9	not applicable	not applicable	missing	South Africa	whole individual	larval/pupal	NA	male	NA	drone	NA	larval/pupal	male	whole body		NA	NA	South Africa	Negative	0	0	0	0	0	48	139
SRR10055110	10839222	2709805500	250	Scu-LT-5-8	WGS	RANDOM	GENOMIC	PAIRED	ILLUMINA	Illumina HiSeq 2500	PRJNA516678	SAMN12671549	scu_lt_5_8	not applicable	not applicable	missing	South Africa	whole individual	larval/pupal	NA	male	NA	drone	NA	larval/pupal	male	whole body		NA	NA	South Africa	Negative	0	0	0	0	0	0	279
SRR10055126	10799428	2721455856	252	Scu-D-2-3	WGS	RANDOM	GENOMIC	PAIRED	ILLUMINA	Illumina HiSeq 2500	PRJNA516678	SAMN12671534	scu_d_2_3	not applicable	not applicable	missing	South Africa	whole individual	larval/pupal	NA	male	NA	drone	NA	larval/pupal	male	whole body		NA	NA	South Africa	Negative	0	0	0	0	0	28	72
SRR10055193	10761686	2711944872	252	Cap-SB-2-1	WGS	RANDOM	GENOMIC	PAIRED	ILLUMINA	Illumina HiSeq 2500	PRJNA516678	SAMN12671493	cap_sb_2_1	not applicable	not applicable	missing	South Africa	whole individual	larval/pupal	NA	male	NA	drone	NA	larval/pupal	male	whole body		NA	NA	South Africa	Negative	0	0	0	0	0	2	180
SRR10055250	10609298	2652324500	250	Cap-SOM-1-2	WGS	RANDOM	GENOMIC	PAIRED	ILLUMINA	Illumina HiSeq 2500	PRJNA516678	SAMN12671513	cap_som_1_2	not applicable	not applicable	missing	South Africa	whole individual	larval/pupal	NA	male	NA	drone	NA	larval/pupal	male	whole body		NA	NA	South Africa	Negative	0	0	0	0	0	0	108
SRR8468993	10420756	3131343932	300	709502.Apis21.PXX.TH	WGS	RANDOM	GENOMIC	PAIRED	ILLUMINA	Illumina HiSeq 4000	PRJNA507348	SAMN10784786	709502_Apis21_PXX_TH	709502.Apis21.PXX.TH	Beehive, offspring of a naturally mated Cape Honeybee queen from the Cape of Good Hope peninsula	2016	South Africa: Cape of Good Hope region	whole body	NA	NA	female	NA	NA	NA	NA	female	whole body		NA	NA	South Africa	Negative	0	0	0	0	0	68	73
SRR10055125	10254227	2584065204	252	Scu-D-2-7	WGS	RANDOM	GENOMIC	PAIRED	ILLUMINA	Illumina HiSeq 2500	PRJNA516678	SAMN12671538	scu_d_2_7	not applicable	not applicable	missing	South Africa	whole individual	larval/pupal	NA	male	NA	drone	NA	larval/pupal	male	whole body		NA	NA	South Africa	Negative	0	0	0	0	0	0	68
SRR10055227	10164953	2541238250	250	Cap-SOM-1-4	WGS	RANDOM	GENOMIC	PAIRED	ILLUMINA	Illumina HiSeq 2500	PRJNA516678	SAMN12671515	cap_som_1_4	not applicable	not applicable	missing	South Africa	whole individual	larval/pupal	NA	male	NA	drone	NA	larval/pupal	male	whole body		NA	NA	South Africa	Negative	0	0	0	0	0	0	105
SRR2157942	10095781	1958581514	194	Recruit_8	WGS	RANDOM	GENOMIC	PAIRED	ILLUMINA	Illumina HiSeq 2000	PRJNA292680	SAMN03983459	Recruit_8	R8	NA	2011	USA: University of Illinois Bee Research Facility, Urbana, IL	whole body	forager	NA	female	adult	NA	NA	adult	female	whole body		NA	NA	USA	Negative	0	0	0	0	0	48	0
SRR10055118	10095098	2523774500	250	Scu-LT-5-1	WGS	RANDOM	GENOMIC	PAIRED	ILLUMINA	Illumina HiSeq 2500	PRJNA516678	SAMN12671542	scu_lt_5_1	not applicable	not applicable	missing	South Africa	whole individual	larval/pupal	NA	male	NA	drone	NA	larval/pupal	male	whole body		NA	NA	South Africa	Negative	0	0	0	0	0	2	155
SRR10055160	10000362	2520091224	252	Scu-D-1-10	WGS	RANDOM	GENOMIC	PAIRED	ILLUMINA	Illumina HiSeq 2500	PRJNA516678	SAMN12671521	scu_d_1_10	not applicable	not applicable	missing	South Africa	whole individual	larval/pupal	NA	male	NA	drone	NA	larval/pupal	male	whole body		NA	NA	South Africa	Negative	0	0	0	0	0	8	162
SRR10055205	9930983	2482745750	250	Cap-SOM-1-6	WGS	RANDOM	GENOMIC	PAIRED	ILLUMINA	Illumina HiSeq 2500	PRJNA516678	SAMN12671517	cap_som_1_6	not applicable	not applicable	missing	South Africa	whole individual	larval/pupal	NA	male	NA	drone	NA	larval/pupal	male	whole body		NA	NA	South Africa	Negative	0	0	0	0	0	0	90
SRR10055182	9677427	2419356750	250	Cap-SOM-1-8	WGS	RANDOM	GENOMIC	PAIRED	ILLUMINA	Illumina HiSeq 2500	PRJNA516678	SAMN12671519	cap_som_1_8	not applicable	not applicable	missing	South Africa	whole individual	larval/pupal	NA	male	NA	drone	NA	larval/pupal	male	whole body		NA	NA	South Africa	Negative	0	0	0	0	0	0	129
SRR10055134	9560382	2409216264	252	Scu-D-1-7	WGS	RANDOM	GENOMIC	PAIRED	ILLUMINA	Illumina HiSeq 2500	PRJNA516678	SAMN12671527	scu_d_1_7	not applicable	not applicable	missing	South Africa	whole individual	larval/pupal	NA	male	NA	drone	NA	larval/pupal	male	whole body		NA	NA	South Africa	Negative	0	0	0	0	0	156	33
SRR10055148	9174932	2312082864	252	Scu-D-1-1	WGS	RANDOM	GENOMIC	PAIRED	ILLUMINA	Illumina HiSeq 2500	PRJNA516678	SAMN12671522	scu_d_1_1	not applicable	not applicable	missing	South Africa	whole individual	larval/pupal	NA	male	NA	drone	NA	larval/pupal	male	whole body		NA	NA	South Africa	Negative	0	0	0	0	0	159	31
SRR8468970	9162641	2753343300	300	709506.Apis69.P03.TH.core	WGS	RANDOM	GENOMIC	PAIRED	ILLUMINA	Illumina HiSeq 4000	PRJNA507348	SAMN10784752	709506_Apis69_P03_TH_core	709506.Apis69.P03.TH.core	Beehive, offspring of a naturally mated Cape Honeybee queen from the Cape of Good Hope peninsula	2016	South Africa: Cape of Good Hope region	whole body	NA	NA	female	NA	NA	NA	NA	female	whole body		NA	NA	South Africa	Negative	0	0	0	0	0	43	89
SRR10055329	8831202	2225462904	252	Cap-SB-4-3	WGS	RANDOM	GENOMIC	PAIRED	ILLUMINA	Illumina HiSeq 2500	PRJNA516678	SAMN12671506	cap_sb_4_3	not applicable	not applicable	missing	South Africa	whole individual	larval/pupal	NA	male	NA	drone	NA	larval/pupal	male	whole body		NA	NA	South Africa	Negative	0	0	0	0	0	42	58
SRR2157940	7487729	1452619426	194	Recruit_6	WGS	RANDOM	GENOMIC	PAIRED	ILLUMINA	Illumina HiSeq 2000	PRJNA292680	SAMN03983457	Recruit_6	R6	NA	2011	USA: University of Illinois Bee Research Facility, Urbana, IL	whole body	forager	NA	female	adult	NA	NA	adult	female	whole body		NA	NA	USA	Negative	0	0	0	0	0	44	0
SRR2163227	6511279	1263188126	194	Scout_21	WGS	RANDOM	GENOMIC	PAIRED	ILLUMINA	Illumina HiSeq 2000	PRJNA292680	SAMN03983494	Scout_21	S21	NA	2011	USA: University of Illinois Bee Research Facility, Urbana, IL	whole body	forager	NA	female	adult	NA	NA	adult	female	whole body		NA	NA	USA	Negative	0	0	0	0	0	21	0
SRR10055109	13879317	3497587884	252	Cap-SB-2-7	WGS	RANDOM	GENOMIC	PAIRED	ILLUMINA	Illumina HiSeq 2500	PRJNA516678	SAMN12671499	cap_sb_2_7	not applicable	not applicable	missing	South Africa	whole individual	larval/pupal	NA	male	NA	drone	NA	larval/pupal	male	whole body		NA	NA	South Africa	Negative	0	0	0	0	0	3	107
SRR14703815	77372671	23366546642	302	Alamark32_S30	WGS	RANDOM	GENOMIC	PAIRED	ILLUMINA	HiSeq X Five	PRJNA729035	SAMN19109611	Alamark32_S30	Apis_mellifera_Alamark32_S30	Not Applicable	2016	Egypt: Dairout	Full Thorax	Adult	NA	female	NA	NA	NA	adult	female	thorax		NA	NA	Egypt	Negative	0	0	0	0	0	0	287
SRR14703887	76519026	23108745852	302	Asyr_kov8	WGS	RANDOM	GENOMIC	PAIRED	ILLUMINA	HiSeq X Five	PRJNA729035	SAMN19109703	Asyr_kov8	Apis_mellifera_Asyr_kov8	Not Applicable	Not Collected	Syria	1/2 Thorax	Adult	NA	female	NA	NA	NA	adult	female	thorax		NA	NA	Syria	Negative	0	0	0	0	0	99	48
SRR14703816	73113644	22080320488	302	Alamark31_S29	WGS	RANDOM	GENOMIC	PAIRED	ILLUMINA	HiSeq X Five	PRJNA729035	SAMN19109610	Alamark31_S29	Apis_mellifera_Alamark31_S29	Not Applicable	2016	Egypt: Dairout	Full Thorax	Adult	NA	female	NA	NA	NA	adult	female	thorax		NA	NA	Egypt	Negative	0	0	0	0	0	0	195
SRR14703881	72521678	21901546756	302	Asyr_kov9	WGS	RANDOM	GENOMIC	PAIRED	ILLUMINA	HiSeq X Five	PRJNA729035	SAMN19109709	Asyr_kov9	Apis_mellifera_Asyr_kov9	Not Applicable	Not Collected	Syria	1/2 Thorax	Adult	NA	female	NA	NA	NA	adult	female	thorax		NA	NA	Syria	Negative	0	0	0	0	0	60	63
SRR10572009	71691216	21507364800	300	1_GM_115	WGS	unspecified	GENOMIC	PAIRED	ILLUMINA	Illumina NovaSeq 6000	PRJNA592197	SAMN13415880	Cape_grandmother	RSA2017_47_1	RSA2017_47	1/29/2018	South Africa: Stellenbosch	thorax muscles	NA	NA	female	NA	NA	NA	NA	female	thorax		NA	NA	South Africa	Negative	0	0	0	0	0	78	111
SRR14703880	70955893	21428679686	302	Asyr_kov90	WGS	RANDOM	GENOMIC	PAIRED	ILLUMINA	HiSeq X Five	PRJNA729035	SAMN19109710	Asyr_kov90	Apis_mellifera_Asyr_kov90	Not Applicable	Not Collected	Syria	1/2 Thorax	Adult	NA	female	NA	NA	NA	adult	female	thorax		NA	NA	Syria	Negative	0	0	0	0	0	38	138
SRR14703785	70408944	21263501088	302	Acap_177A	WGS	RANDOM	GENOMIC	PAIRED	ILLUMINA	HiSeq X Five	PRJNA729035	SAMN19109594	Acap_177A	Apis_mellifera_Acap_177A	Not Applicable	2012	South Africa: Cape Point	1/2 Thorax	Adult	NA	female	NA	NA	NA	adult	female	thorax		NA	NA	South Africa	Negative	0	0	0	0	0	78	57
SRR14703857	70100112	21170233824	302	Ayem_SN4	WGS	RANDOM	GENOMIC	PAIRED	ILLUMINA	HiSeq X Five	PRJNA729035	SAMN19109688	Ayem_SN4	Apis_mellifera_Ayem_SN4	Not Applicable	Not Collected	Yemen: Sanaa	Full Thorax	Adult	NA	female	NA	NA	NA	adult	female	thorax		NA	NA	Yemen	Negative	0	0	0	0	0	245	0
SRR14703886	68480299	20681050298	302	Asyr_kov84	WGS	RANDOM	GENOMIC	PAIRED	ILLUMINA	HiSeq X Five	PRJNA729035	SAMN19109704	Asyr_kov84	Apis_mellifera_Asyr_kov84	Not Applicable	Not Collected	Syria	1/2 Thorax	Adult	NA	female	NA	NA	NA	adult	female	thorax		NA	NA	Syria	Negative	0	0	0	0	0	75	100
SRR14703913	66592155	20110830810	302	Acap_188	WGS	RANDOM	GENOMIC	PAIRED	ILLUMINA	HiSeq X Five	PRJNA729035	SAMN19109693	Acap_188	Apis_mellifera_Acap_188	Not Applicable	2012	South Africa: Somerset West	1/2 Thorax	Adult	NA	female	NA	NA	NA	adult	female	thorax		NA	NA	South Africa	Negative	0	0	0	0	0	50	94
SRR14703889	66025654	19939747508	302	Asyr_kov10	WGS	RANDOM	GENOMIC	PAIRED	ILLUMINA	HiSeq X Five	PRJNA729035	SAMN19109702	Asyr_kov10	Apis_mellifera_Asyr_kov10	Not Applicable	Not Collected	Syria	1/2 Thorax	Adult	NA	female	NA	NA	NA	adult	female	thorax		NA	NA	Syria	Negative	0	0	0	0	0	127	30
SRR14703819	63612784	19211060768	302	Alamark22_S28	WGS	RANDOM	GENOMIC	PAIRED	ILLUMINA	HiSeq X Five	PRJNA729035	SAMN19109609	Alamark22_S28	Apis_mellifera_Alamark22_S28	Not Applicable	2016	Egypt: Dairout	Full Thorax	Adult	NA	female	NA	NA	NA	adult	female	thorax		NA	NA	Egypt	Negative	0	0	0	0	0	41	179
SRR14703822	63282348	19111269096	302	Alamark12_S26	WGS	RANDOM	GENOMIC	PAIRED	ILLUMINA	HiSeq X Five	PRJNA729035	SAMN19109607	Alamark12_S26	Apis_mellifera_Alamark12_S26	Not Applicable	2016	Egypt: Dairout	Full Thorax	Adult	NA	female	NA	NA	NA	adult	female	thorax		NA	NA	Egypt	Negative	0	0	0	0	0	0	310
SRR14703820	63054982	19042604564	302	Alamark21_S27	WGS	RANDOM	GENOMIC	PAIRED	ILLUMINA	HiSeq X Five	PRJNA729035	SAMN19109608	Alamark21_S27	Apis_mellifera_Alamark21_S27	Not Applicable	2016	Egypt: Dairout	Full Thorax	Adult	NA	female	NA	NA	NA	adult	female	thorax		NA	NA	Egypt	Negative	0	0	0	0	0	55	134
SRR14703896	59063730	17837246460	302	Acap_182	WGS	RANDOM	GENOMIC	PAIRED	ILLUMINA	HiSeq X Five	PRJNA729035	SAMN19109626	Acap_182	Apis_mellifera_Acap_182	Not Applicable	2012	South Africa: Heidelburg	1/2 Thorax	Adult	NA	female	NA	NA	NA	adult	female	thorax		NA	NA	South Africa	Negative	0	0	0	0	0	25	159
SRR14703901	58833528	17767725456	302	Ascu_litZim3	WGS	RANDOM	GENOMIC	PAIRED	ILLUMINA	HiSeq X Five	PRJNA729035	SAMN19109624	Ascu_litZim3	Apis_mellifera_Ascu_litZim3	Not Applicable	Not Collected	Zimbabwe: Harare	1/2 Thorax	Adult	NA	female	NA	NA	NA	adult	female	thorax		NA	NA	Zimbabwe	Negative	0	0	0	0	0	131	176
SRR14703933	58756644	17744506488	302	Apom_Kyrg3B	WGS	RANDOM	GENOMIC	PAIRED	ILLUMINA	HiSeq X Five	PRJNA729035	SAMN19109716	Apom_Kyrg3B	Apis_mellifera_Apom_Kyrg3B	Not Applicable	2008	Kyrgyzstan: Tjurgon Ak-Suu Valley	1/2 Thorax	Adult	NA	female	NA	NA	NA	adult	female	thorax		NA	NA	Kyrgyzstan	Negative	0	0	0	0	0	116	0
SRR14703903	58607363	17699423626	302	Ascu_litZim2	WGS	RANDOM	GENOMIC	PAIRED	ILLUMINA	HiSeq X Five	PRJNA729035	SAMN19109623	Ascu_litZim2	Apis_mellifera_Ascu_litZim2	Not Applicable	Not Collected	Zimbabwe: Harare	1/2 Thorax	Adult	NA	female	NA	NA	NA	adult	female	thorax		NA	NA	Zimbabwe	Negative	0	0	0	0	0	0	202
SRR14703904	58220843	17582694586	302	Ascu_litZim1	WGS	RANDOM	GENOMIC	PAIRED	ILLUMINA	HiSeq X Five	PRJNA729035	SAMN19109622	Ascu_litZim1	Apis_mellifera_Ascu_litZim1	Not Applicable	Not Collected	Zimbabwe: Harare	1/2 Thorax	Adult	NA	female	NA	NA	NA	adult	female	thorax		NA	NA	Zimbabwe	Negative	0	0	0	0	0	40	167
SRR14703908	57530151	17374105602	302	Ascu_Bot2	WGS	RANDOM	GENOMIC	PAIRED	ILLUMINA	HiSeq X Five	PRJNA729035	SAMN19109616	Ascu_Bot2	Apis_mellifera_Ascu_Bot2	Not Applicable	Not Collected	Botswana: Gaborone	1/2 Thorax	Adult	NA	female	NA	NA	NA	adult	female	thorax		NA	NA	Botswana	Negative	0	0	0	0	0	32	115
SRR14703860	53558901	16174788102	302	Ayem_SI4	WGS	RANDOM	GENOMIC	PAIRED	ILLUMINA	HiSeq X Five	PRJNA729035	SAMN19109692	Ayem_SI4	Apis_mellifera_Ayem_SI4	Not Applicable	Not Collected	Yemen: Socotra Island	Full Thorax	Adult	NA	female	NA	NA	NA	adult	female	thorax		NA	NA	Yemen	Negative	0	0	0	0	0	56	260
SRR10548565	53114914	15934474200	300	Worker	WGS	unspecified	GENOMIC	PAIRED	ILLUMINA	Illumina NovaSeq 6000	PRJNA592273	SAMN13419550	Worker_SuperCape	RSA2017-288	SC 5	2/11/2018	South Africa: Stellenbosch	thorax muscles	NA	NA	female	NA	NA	NA	NA	female	thorax		NA	NA	South Africa	Negative	0	0	0	0	0	0	229
SRR14703932	51868236	15664207272	302	Apom_Kyrg4B	WGS	RANDOM	GENOMIC	PAIRED	ILLUMINA	HiSeq X Five	PRJNA729035	SAMN19109717	Apom_Kyrg4B	Apis_mellifera_Apom_Kyrg4B	Not Applicable	2008	Kyrgyzstan: Tjurgon Ak-Suu Valley	1/2 Thorax	Adult	NA	female	NA	NA	NA	adult	female	thorax		NA	NA	Kyrgyzstan	Negative	0	0	0	0	0	100	0
SRR14703935	47231935	14264044370	302	Apom_Kyrg2B	WGS	RANDOM	GENOMIC	PAIRED	ILLUMINA	HiSeq X Five	PRJNA729035	SAMN19109715	Apom_Kyrg2B	Apis_mellifera_Apom_Kyrg2B	Not Applicable	2008	Kyrgyzstan: Tjurgon Ak-Suu Valley	1/2 Thorax	Adult	NA	female	NA	NA	NA	adult	female	thorax		NA	NA	Kyrgyzstan	Negative	0	0	0	0	0	235	0
SRR8061554	44918395	13475518500	300	HAMWAADXX_AGCTTAT	WGS	other	GENOMIC	PAIRED	ILLUMINA	Illumina HiSeq 2000	PRJNA496560	SAMN10245906	sub-lineage.c	Female honey bee c	Honey bee colony	2010	South Africa	Thorax	NA	NA	NA	NA	NA	NA	NA	female	thorax		NA	NA	South Africa	Negative	0	0	0	0	0	51	138
SRR14703928	41490024	12529987248	302	Apom_KyrgE2	WGS	RANDOM	GENOMIC	PAIRED	ILLUMINA	HiSeq X Five	PRJNA729035	SAMN19109615	Apom_KyrgE2	Apis_mellifera_Apom_KyrgE2	Not Applicable	2008	Kyrgyzstan: Dshuukn Valley	1/2 Thorax	Adult	NA	female	NA	NA	NA	adult	female	thorax		NA	NA	Kyrgyzstan	Negative	0	0	0	0	0	153	0
SRR14703929	41062881	12400990062	302	Apom_KyrgD2	WGS	RANDOM	GENOMIC	PAIRED	ILLUMINA	HiSeq X Five	PRJNA729035	SAMN19109614	Apom_KyrgD2	Apis_mellifera_Apom_KyrgD2	Not Applicable	2008	Kyrgyzstan: Dshuukn Valley	1/2 Thorax	Adult	NA	female	NA	NA	NA	adult	female	thorax		NA	NA	Kyrgyzstan	Negative	0	0	0	0	0	161	0
SRR8061555	40700433	12210129900	300	HAMWAADXX_GTGGCCTT	WGS	other	GENOMIC	PAIRED	ILLUMINA	Illumina HiSeq 2000	PRJNA496560	SAMN10245904	sub-lineage.a	Female honey bee a	Honey bee colony	2010	South Africa	Thorax	NA	NA	NA	NA	NA	NA	NA	female	thorax		NA	NA	South Africa	Negative	0	0	0	0	0	39	98
SRR14703877	28423822	8583994244	302	Acap_69B	WGS	RANDOM	GENOMIC	PAIRED	ILLUMINA	HiSeq X Five	PRJNA729035	SAMN19109684	Acap_69B	Apis_mellifera_Acap_69B	Not Applicable	2012	South Africa	1/2 Thorax	Adult	NA	female	NA	NA	NA	adult	female	thorax		NA	NA	South Africa	Negative	0	0	0	0	0	0	252
SRR7252430	27757540	8327262000	300	K1	WGS	RANDOM	GENOMIC	PAIRED	ILLUMINA	HiSeq X Ten	PRJNA473430	SAMN09273596	K1	Drone	Haute-Garonne	2017-06	France	Thorax	NA	NA	male	Pupa	NA	NA	larval/pupal	male	thorax		NA	NA	France	Negative	0	0	0	0	0	103	0
SRR14703883	26940809	8136124318	302	Asyr_kov88	WGS	RANDOM	GENOMIC	PAIRED	ILLUMINA	HiSeq X Five	PRJNA729035	SAMN19109707	Asyr_kov88	Apis_mellifera_Asyr_kov88	Not Applicable	Not Collected	Syria	1/2 Thorax	Adult	NA	female	NA	NA	NA	adult	female	thorax		NA	NA	Syria	Negative	0	0	0	0	0	46	62
SRR14703888	26833494	8103715188	302	Acap_69A	WGS	RANDOM	GENOMIC	PAIRED	ILLUMINA	HiSeq X Five	PRJNA729035	SAMN19109683	Acap_69A	Apis_mellifera_Acap_69A	Not Applicable	2012	South Africa	1/2 Thorax	Adult	NA	female	NA	NA	NA	adult	female	thorax		NA	NA	South Africa	Negative	0	0	0	0	0	3	91
SRR7252442	26092589	7827776700	300	B5	WGS	RANDOM	GENOMIC	PAIRED	ILLUMINA	HiSeq X Ten	PRJNA473430	SAMN09273573	B5	Drone	Haute-Garonne	2017-06	France	Thorax	NA	NA	male	Pupa	NA	NA	larval/pupal	male	thorax		NA	NA	France	Negative	0	0	0	0	0	73	0
SRR14703866	25383342	7665769284	302	Acap_84	WGS	RANDOM	GENOMIC	PAIRED	ILLUMINA	HiSeq X Five	PRJNA729035	SAMN19109725	Acap_84	Apis_mellifera_Acap_84	Not Applicable	2012	South Africa: West Coast NP	1/2 Thorax	Adult	NA	female	NA	NA	NA	adult	female	thorax		NA	NA	South Africa	Negative	0	0	0	0	0	107	150
SRR7252428	24966433	7489929900	300	K5	WGS	RANDOM	GENOMIC	PAIRED	ILLUMINA	HiSeq X Ten	PRJNA473430	SAMN09273571	K5	Drone	Haute-Garonne	2017-06	France	Thorax	NA	NA	male	Pupa	NA	NA	larval/pupal	male	thorax		NA	NA	France	Negative	0	0	0	0	0	44	0
SRR14703885	24371165	7360091830	302	Asyr_kov85	WGS	RANDOM	GENOMIC	PAIRED	ILLUMINA	HiSeq X Five	PRJNA729035	SAMN19109705	Asyr_kov85	Apis_mellifera_Asyr_kov85	Not Applicable	Not Collected	Syria	1/2 Thorax	Adult	NA	female	NA	NA	NA	adult	female	thorax		NA	NA	Syria	Negative	0	0	0	0	0	113	0
SRR14703884	24213691	7312534682	302	Asyr_kov87	WGS	RANDOM	GENOMIC	PAIRED	ILLUMINA	HiSeq X Five	PRJNA729035	SAMN19109706	Asyr_kov87	Apis_mellifera_Asyr_kov87	Not Applicable	Not Collected	Syria	1/2 Thorax	Adult	NA	female	NA	NA	NA	adult	female	thorax		NA	NA	Syria	Negative	0	0	0	0	0	96	27
SRR7252412	24088625	7226587500	300	G8	WGS	RANDOM	GENOMIC	PAIRED	ILLUMINA	HiSeq X Ten	PRJNA473430	SAMN09273587	G8	Drone	Haute-Garonne	2017-06	France	Thorax	NA	NA	male	Pupa	NA	NA	larval/pupal	male	thorax		NA	NA	France	Negative	0	0	0	0	0	118	0
SRR14703882	23844997	7201189094	302	Asyr_kov89	WGS	RANDOM	GENOMIC	PAIRED	ILLUMINA	HiSeq X Five	PRJNA729035	SAMN19109708	Asyr_kov89	Apis_mellifera_Asyr_kov89	Not Applicable	Not Collected	Syria	1/2 Thorax	Adult	NA	female	NA	NA	NA	adult	female	thorax		NA	NA	Syria	Negative	0	0	0	0	0	124	24
SRR7252437	23805127	7141538100	300	E0	WGS	RANDOM	GENOMIC	PAIRED	ILLUMINA	HiSeq X Ten	PRJNA473430	SAMN09273580	E0	Drone	Haute-Garonne	2017-06	France	Thorax	NA	NA	male	Pupa	NA	NA	larval/pupal	male	thorax		NA	NA	France	Negative	0	0	0	0	0	125	0
SRR7252432	23130435	6939130500	300	I5	WGS	RANDOM	GENOMIC	PAIRED	ILLUMINA	HiSeq X Ten	PRJNA473430	SAMN09273593	I5	Drone	Haute-Garonne	2017-06	France	Thorax	NA	NA	male	Pupa	NA	NA	larval/pupal	male	thorax		NA	NA	France	Negative	0	0	0	0	0	100	0
SRR7252413	22978726	6893617800	300	H5	WGS	RANDOM	GENOMIC	PAIRED	ILLUMINA	HiSeq X Ten	PRJNA473430	SAMN09273590	H5	Drone	Haute-Garonne	2017-06	France	Thorax	NA	NA	male	Pupa	NA	NA	larval/pupal	male	thorax		NA	NA	France	Negative	0	0	0	0	0	107	0
SRR7252425	22508513	6752553900	300	G9	WGS	RANDOM	GENOMIC	PAIRED	ILLUMINA	HiSeq X Ten	PRJNA473430	SAMN09273564	G9	Drone	Haute-Garonne	2017-06	France	Thorax	NA	NA	male	Pupa	NA	NA	larval/pupal	male	thorax		NA	NA	France	Negative	0	0	0	0	0	114	0
SRR14703861	22506288	6796898976	302	Ayem_SI3	WGS	RANDOM	GENOMIC	PAIRED	ILLUMINA	HiSeq X Five	PRJNA729035	SAMN19109691	Ayem_SI3	Apis_mellifera_Ayem_SI3	Not Applicable	Not Collected	Yemen: Socotra Island	Full Thorax	Adult	NA	female	NA	NA	NA	adult	female	thorax		NA	NA	Yemen	Negative	0	0	0	0	0	66	148
SRR7252449	22156895	6647068500	300	B3	WGS	RANDOM	GENOMIC	PAIRED	ILLUMINA	HiSeq X Ten	PRJNA473430	SAMN09273553	B3	Drone	Haute-Garonne	2017-06	France	Thorax	NA	NA	male	Pupa	NA	NA	larval/pupal	male	thorax		NA	NA	France	Negative	0	0	0	0	0	186	0
SRR7252447	21893529	6568058700	300	E3	WGS	RANDOM	GENOMIC	PAIRED	ILLUMINA	HiSeq X Ten	PRJNA473430	SAMN09273559	E3	Drone	Haute-Garonne	2017-06	France	Thorax	NA	NA	male	Pupa	NA	NA	larval/pupal	male	thorax		NA	NA	France	Negative	0	0	0	0	0	93	0
SRR7252414	21323732	6397119600	300	H2	WGS	RANDOM	GENOMIC	PAIRED	ILLUMINA	HiSeq X Ten	PRJNA473430	SAMN09273589	H2	Drone	Haute-Garonne	2017-06	France	Thorax	NA	NA	male	Pupa	NA	NA	larval/pupal	male	thorax		NA	NA	France	Negative	0	0	0	0	0	86	0
SRR7252443	21111702	6333510600	300	B8	WGS	RANDOM	GENOMIC	PAIRED	ILLUMINA	HiSeq X Ten	PRJNA473430	SAMN09273574	B8	Drone	Haute-Garonne	2017-06	France	Thorax	NA	NA	male	Pupa	NA	NA	larval/pupal	male	thorax		NA	NA	France	Negative	0	0	0	0	0	108	0
SRR7252409	20908384	6272515200	300	I0	WGS	RANDOM	GENOMIC	PAIRED	ILLUMINA	HiSeq X Ten	PRJNA473430	SAMN09273592	I0	Drone	Haute-Garonne	2017-06	France	Thorax	NA	NA	male	Pupa	NA	NA	larval/pupal	male	thorax		NA	NA	France	Negative	0	0	0	0	0	55	0
SRR7252433	20729323	6218796900	300	J3	WGS	RANDOM	GENOMIC	PAIRED	ILLUMINA	HiSeq X Ten	PRJNA473430	SAMN09273594	J3	Drone	Haute-Garonne	2017-06	France	Thorax	NA	NA	male	Pupa	NA	NA	larval/pupal	male	thorax		NA	NA	France	Negative	0	0	0	0	0	114	0
SRR7252438	19881863	5964558900	300	D2	WGS	RANDOM	GENOMIC	PAIRED	ILLUMINA	HiSeq X Ten	PRJNA473430	SAMN09273577	D2	Drone	Haute-Garonne	2017-06	France	Thorax	NA	NA	male	Pupa	NA	NA	larval/pupal	male	thorax		NA	NA	France	Negative	0	0	0	0	0	135	0
SRR7252421	19227660	5768298000	300	J1	WGS	RANDOM	GENOMIC	PAIRED	ILLUMINA	HiSeq X Ten	PRJNA473430	SAMN09273568	J1	Drone	Haute-Garonne	2017-06	France	Thorax	NA	NA	male	Pupa	NA	NA	larval/pupal	male	thorax		NA	NA	France	Negative	0	0	0	0	0	116	0
SRR7252415	18854638	5656391400	300	F7	WGS	RANDOM	GENOMIC	PAIRED	ILLUMINA	HiSeq X Ten	PRJNA473430	SAMN09273584	F7	Drone	Haute-Garonne	2017-06	France	Thorax	NA	NA	male	Pupa	NA	NA	larval/pupal	male	thorax		NA	NA	France	Negative	0	0	0	0	0	70	0
SRR7252448	18819442	5645832600	300	C1	WGS	RANDOM	GENOMIC	PAIRED	ILLUMINA	HiSeq X Ten	PRJNA473430	SAMN09273554	C1	Drone	Haute-Garonne	2017-06	France	Thorax	NA	NA	male	Pupa	NA	NA	larval/pupal	male	thorax		NA	NA	France	Negative	0	0	0	0	0	70	0
SRR7252429	18576223	5572866900	300	J5	WGS	RANDOM	GENOMIC	PAIRED	ILLUMINA	HiSeq X Ten	PRJNA473430	SAMN09273595	J5	Drone	Haute-Garonne	2017-06	France	Thorax	NA	NA	male	Pupa	NA	NA	larval/pupal	male	thorax		NA	NA	France	Negative	0	0	0	0	0	89	0
SRR7252431	18111392	5433417600	300	K9	WGS	RANDOM	GENOMIC	PAIRED	ILLUMINA	HiSeq X Ten	PRJNA473430	SAMN09273597	K9	Drone	Haute-Garonne	2017-06	France	Thorax	NA	NA	male	Pupa	NA	NA	larval/pupal	male	thorax		NA	NA	France	Negative	0	0	0	0	0	54	0
SRR7252452	17996521	5398956300	300	F3	WGS	RANDOM	GENOMIC	PAIRED	ILLUMINA	HiSeq X Ten	PRJNA473430	SAMN09273562	F3	Drone	Haute-Garonne	2017-06	France	Thorax	NA	NA	male	Pupa	NA	NA	larval/pupal	male	thorax		NA	NA	France	Negative	0	0	0	0	0	70	0
SRR7252426	17042729	5112818700	300	F6	WGS	RANDOM	GENOMIC	PAIRED	ILLUMINA	HiSeq X Ten	PRJNA473430	SAMN09273563	F6	Drone	Haute-Garonne	2017-06	France	Thorax	NA	NA	male	Pupa	NA	NA	larval/pupal	male	thorax		NA	NA	France	Negative	0	0	0	0	0	57	0
SRR957082	224552567	11227628350	50		WGS	RANDOM	GENOMIC	SINGLE	ILLUMINA	Illumina HiSeq 2000	PRJNA216922	SAMN02324163	C195	NA	NA	NA	Croatia: Novalija, Pag Island	NA	NA	NA	female	NA	NA	NA	NA	female	NA		NA	NA	Croatia	Negative	0	0	0	0	0	26	0
SRR957084	216174397	10808719850	50		WGS	RANDOM	GENOMIC	SINGLE	ILLUMINA	Illumina HiSeq 2000	PRJNA216922	SAMN02324165	C199	NA	NA	NA	Croatia: Baric Draga	NA	NA	NA	female	NA	NA	NA	NA	female	NA		NA	NA	Croatia	Negative	0	0	0	0	0	14	0
SRR957058	209654135	10482706750	50		WGS	RANDOM	GENOMIC	SINGLE	ILLUMINA	Illumina HiSeq 2000	PRJNA216922	SAMN02324172	M218	NA	NA	NA	Poland: Rudawka	NA	NA	NA	female	NA	NA	NA	NA	female	NA		NA	NA	Poland	Negative	0	0	0	0	0	8	0
SRR957090	208163470	10408173500	50		WGS	RANDOM	GENOMIC	SINGLE	ILLUMINA	Illumina HiSeq 2000	PRJNA216922	SAMN02324171	M217	NA	NA	NA	Poland: Rudawka	NA	NA	NA	female	NA	NA	NA	NA	female	NA		NA	NA	Poland	Negative	0	0	0	0	0	24	0
SRR957089	204411030	10220551500	50		WGS	RANDOM	GENOMIC	SINGLE	ILLUMINA	Illumina HiSeq 2000	PRJNA216922	SAMN02324170	M207	NA	NA	NA	Poland: Zalewo	NA	NA	NA	female	NA	NA	NA	NA	female	NA		NA	NA	Poland	Negative	0	0	0	0	0	22	0
SRR957096	198615748	9930787400	50		WGS	RANDOM	GENOMIC	SINGLE	ILLUMINA	Illumina HiSeq 2000	PRJNA216922	SAMN02324198	S301	NA	NA	NA	South Africa: East Cape	NA	NA	NA	female	NA	NA	NA	NA	female	NA		NA	NA	South Africa	Negative	0	0	0	0	0	7	9
SRR957097	197201631	9860081550	50		WGS	RANDOM	GENOMIC	SINGLE	ILLUMINA	Illumina HiSeq 2000	PRJNA216922	SAMN02324199	S302	NA	NA	NA	South Africa: East Cape	NA	NA	NA	female	NA	NA	NA	NA	female	NA		NA	NA	South Africa	Negative	0	0	0	0	0	4	10
SRR957091	196435242	9821762100	50		WGS	RANDOM	GENOMIC	SINGLE	ILLUMINA	Illumina HiSeq 2000	PRJNA216922	SAMN02324193	S286	NA	NA	NA	South Africa: NW. Cape	NA	NA	NA	female	NA	NA	NA	NA	female	NA		NA	NA	South Africa	Negative	0	0	0	0	0	16	11
SRR957076	195965536	9798276800	50		WGS	RANDOM	GENOMIC	SINGLE	ILLUMINA	Illumina HiSeq 2000	PRJNA216922	SAMN02324190	S280	NA	NA	NA	South Africa: East Cape	NA	NA	NA	female	NA	NA	NA	NA	female	NA		NA	NA	South Africa	Negative	0	0	0	0	0	4	11
SRR957088	195863639	9793181950	50		WGS	RANDOM	GENOMIC	SINGLE	ILLUMINA	Illumina HiSeq 2000	PRJNA216922	SAMN02324169	C273	NA	NA	NA	Slovenia	NA	NA	NA	female	NA	NA	NA	NA	female	NA		NA	NA	Slovenia	Negative	0	0	0	0	0	16	0
SRR957087	195829228	9791461400	50		WGS	RANDOM	GENOMIC	SINGLE	ILLUMINA	Illumina HiSeq 2000	PRJNA216922	SAMN02324168	C236	NA	NA	NA	Slovenia	NA	NA	NA	female	NA	NA	NA	NA	female	NA		NA	NA	Slovenia	Negative	0	0	0	0	0	16	0
SRR957095	195798261	9789913050	50		WGS	RANDOM	GENOMIC	SINGLE	ILLUMINA	Illumina HiSeq 2000	PRJNA216922	SAMN02324197	S300	NA	NA	NA	South Africa: NW. Cape	NA	NA	NA	female	NA	NA	NA	NA	female	NA		NA	NA	South Africa	Negative	0	0	0	0	0	3	11
SRR957092	195129385	9756469250	50		WGS	RANDOM	GENOMIC	SINGLE	ILLUMINA	Illumina HiSeq 2000	PRJNA216922	SAMN02324194	S290	NA	NA	NA	South Africa: West Cape	NA	NA	NA	female	NA	NA	NA	NA	female	NA		NA	NA	South Africa	Negative	0	0	0	0	0	8	12
SRR957075	194674341	9733717050	50		WGS	RANDOM	GENOMIC	SINGLE	ILLUMINA	Illumina HiSeq 2000	PRJNA216922	SAMN02324189	S279	NA	NA	NA	South Africa: East Cape	NA	NA	NA	female	NA	NA	NA	NA	female	NA		NA	NA	South Africa	Negative	0	0	0	0	0	21	0
SRR957081	194619878	9730993900	50		WGS	RANDOM	GENOMIC	SINGLE	ILLUMINA	Illumina HiSeq 2000	PRJNA216922	SAMN02324162	C182	NA	NA	NA	Germany: North Rhine-Westphalia	NA	NA	NA	female	NA	NA	NA	NA	female	NA		NA	NA	Germany	Negative	0	0	0	0	0	21	0
SRR957094	191311956	9565597800	50		WGS	RANDOM	GENOMIC	SINGLE	ILLUMINA	Illumina HiSeq 2000	PRJNA216922	SAMN02324196	S299	NA	NA	NA	South Africa: N/NW Cape	NA	NA	NA	female	NA	NA	NA	NA	female	NA		NA	NA	South Africa	Negative	0	0	0	0	0	20	4
SRR957063	190799031	9539951550	50		WGS	RANDOM	GENOMIC	SINGLE	ILLUMINA	Illumina HiSeq 2000	PRJNA216922	SAMN02324177	M248	NA	NA	NA	Spain: Murcia	NA	NA	NA	female	NA	NA	NA	NA	female	NA		NA	NA	Spain	Negative	0	0	0	0	0	17	0
SRR957080	190372609	9518630450	50		WGS	RANDOM	GENOMIC	SINGLE	ILLUMINA	Illumina HiSeq 2000	PRJNA216922	SAMN02324161	C181	NA	NA	NA	Germany: North Rhine-Westphalia	NA	NA	NA	female	NA	NA	NA	NA	female	NA		NA	NA	Germany	Negative	0	0	0	0	0	30	0
SRR957086	190197387	9509869350	50		WGS	RANDOM	GENOMIC	SINGLE	ILLUMINA	Illumina HiSeq 2000	PRJNA216922	SAMN02324167	C235	NA	NA	NA	Slovenia	NA	NA	NA	female	NA	NA	NA	NA	female	NA		NA	NA	Slovenia	Negative	0	0	0	0	0	15	0
SRR957071	189425114	9471255700	50		WGS	RANDOM	GENOMIC	SINGLE	ILLUMINA	Illumina HiSeq 2000	PRJNA216922	SAMN02324185	O346	NA	NA	NA	Saudi Arabia	NA	NA	NA	female	NA	NA	NA	NA	female	NA		NA	NA	Saudi Arabia	Negative	0	0	0	0	0	46	0
SRR957093	187856538	9392826900	50		WGS	RANDOM	GENOMIC	SINGLE	ILLUMINA	Illumina HiSeq 2000	PRJNA216922	SAMN02324195	S296	NA	NA	NA	South Africa: Freestate	NA	NA	NA	female	NA	NA	NA	NA	female	NA		NA	NA	South Africa	Negative	0	0	0	0	0	21	4
SRR957065	187526429	9376321450	50		WGS	RANDOM	GENOMIC	SINGLE	ILLUMINA	Illumina HiSeq 2000	PRJNA216922	SAMN02324179	O340	NA	NA	NA	Saudi Arabia	NA	NA	NA	female	NA	NA	NA	NA	female	NA		NA	NA	Saudi Arabia	Negative	0	0	0	0	0	48	0
SRR957066	186908807	9345440350	50		WGS	RANDOM	GENOMIC	SINGLE	ILLUMINA	Illumina HiSeq 2000	PRJNA216922	SAMN02324180	O341	NA	NA	NA	Saudi Arabia	NA	NA	NA	female	NA	NA	NA	NA	female	NA		NA	NA	Saudi Arabia	Negative	0	0	0	0	0	29	0
SRR957069	185907628	9295381400	50		WGS	RANDOM	GENOMIC	SINGLE	ILLUMINA	Illumina HiSeq 2000	PRJNA216922	SAMN02324183	O344	NA	NA	NA	Saudi Arabia	NA	NA	NA	female	NA	NA	NA	NA	female	NA		NA	NA	Saudi Arabia	Negative	0	0	0	0	0	30	0
SRR957067	185663916	9283195800	50		WGS	RANDOM	GENOMIC	SINGLE	ILLUMINA	Illumina HiSeq 2000	PRJNA216922	SAMN02324181	O342	NA	NA	NA	Saudi Arabia	NA	NA	NA	female	NA	NA	NA	NA	female	NA		NA	NA	Saudi Arabia	Negative	0	0	0	0	0	26	0
SRR957083	185012723	9250636150	50		WGS	RANDOM	GENOMIC	SINGLE	ILLUMINA	Illumina HiSeq 2000	PRJNA216922	SAMN02324164	C196	NA	NA	NA	Croatia: Komorovac, Pag Island	NA	NA	NA	female	NA	NA	NA	NA	female	NA		NA	NA	Croatia	Negative	0	0	0	0	0	15	0
SRR957068	184785706	9239285300	50		WGS	RANDOM	GENOMIC	SINGLE	ILLUMINA	Illumina HiSeq 2000	PRJNA216922	SAMN02324182	O343	NA	NA	NA	Saudi Arabia	NA	NA	NA	female	NA	NA	NA	NA	female	NA		NA	NA	Saudi Arabia	Negative	0	0	0	0	0	33	0
SRR14703856	184028354	9201417700	50	c206	WGS	RANDOM	GENOMIC	SINGLE	ILLUMINA	Illumina HiSeq 2000	PRJNA729035	SAMN19109726	c206	Apis_mellifera_c206	Not Applicable	2009	Poland: Zalewo	Previously Extracted DNA	Adult	NA	female	NA	NA	NA	adult	female	NA		NA	NA	Poland	Negative	0	0	0	0	0	27	0
SRR957077	183984947	9199247350	50		WGS	RANDOM	GENOMIC	SINGLE	ILLUMINA	Illumina HiSeq 2000	PRJNA216922	SAMN02324191	S284	NA	NA	NA	South Africa: NW. Cape	NA	NA	NA	female	NA	NA	NA	NA	female	NA		NA	NA	South Africa	Negative	0	0	0	0	0	14	3
SRR957059	182150555	9107527750	50		WGS	RANDOM	GENOMIC	SINGLE	ILLUMINA	Illumina HiSeq 2000	PRJNA216922	SAMN02324173	M226	NA	NA	NA	Poland: Sucha Rzeczka	NA	NA	NA	female	NA	NA	NA	NA	female	NA		NA	NA	Poland	Negative	0	0	0	0	0	24	0
SRR957064	181740109	9087005450	50		WGS	RANDOM	GENOMIC	SINGLE	ILLUMINA	Illumina HiSeq 2000	PRJNA216922	SAMN02324178	M256	NA	NA	NA	Spain: Cordoba	NA	NA	NA	female	NA	NA	NA	NA	female	NA		NA	NA	Spain	Negative	0	0	0	0	0	30	0
SRR957060	179799711	8989985550	50		WGS	RANDOM	GENOMIC	SINGLE	ILLUMINA	Illumina HiSeq 2000	PRJNA216922	SAMN02324174	M227	NA	NA	NA	Poland: Sucha Rzeczka	NA	NA	NA	female	NA	NA	NA	NA	female	NA		NA	NA	Poland	Negative	0	0	0	0	0	23	0
SRR957070	179115385	8955769250	50		WGS	RANDOM	GENOMIC	SINGLE	ILLUMINA	Illumina HiSeq 2000	PRJNA216922	SAMN02324184	O345	NA	NA	NA	Saudi Arabia	NA	NA	NA	female	NA	NA	NA	NA	female	NA		NA	NA	Saudi Arabia	Negative	0	0	0	0	0	33	0
SRR957072	177654264	8882713200	50		WGS	RANDOM	GENOMIC	SINGLE	ILLUMINA	Illumina HiSeq 2000	PRJNA216922	SAMN02324186	O347	NA	NA	NA	Yemen	NA	NA	NA	female	NA	NA	NA	NA	female	NA		NA	NA	Yemen	Negative	0	0	0	0	0	28	0
SRR957073	168338022	8416901100	50		WGS	RANDOM	GENOMIC	SINGLE	ILLUMINA	Illumina HiSeq 2000	PRJNA216922	SAMN02324187	O348	NA	NA	NA	Yemen	NA	NA	NA	female	NA	NA	NA	NA	female	NA		NA	NA	Yemen	Negative	0	0	0	0	0	28	0
SRR957061	166207695	8310384750	50		WGS	RANDOM	GENOMIC	SINGLE	ILLUMINA	Illumina HiSeq 2000	PRJNA216922	SAMN02324175	M233	NA	NA	NA	Spain: Cordoba	NA	NA	NA	female	NA	NA	NA	NA	female	NA		NA	NA	Spain	Negative	0	0	0	0	0	20	0
SRR957074	146103161	7305158050	50		WGS	RANDOM	GENOMIC	SINGLE	ILLUMINA	Illumina HiSeq 2000	PRJNA216922	SAMN02324188	O349	NA	NA	NA	Yemen	NA	NA	NA	female	NA	NA	NA	NA	female	NA		NA	NA	Yemen	Negative	0	0	0	0	0	25	0
SRR1425457	102346477	20469295400	200	A59	WGS	RANDOM	GENOMIC	PAIRED	ILLUMINA	Illumina HiSeq 2000	PRJNA252997	SAMN02865980	A59	NA	NA	NA	NA	upper-body	NA	NA	male	1	NA	NA	NA	male	NA		NA	NA	NA	Negative	0	0	0	0	0	45	0
SRR1424586	100364723	20072944600	200	AQ	WGS	RANDOM	GENOMIC	PAIRED	ILLUMINA	Illumina HiSeq 2000	PRJNA252997	SAMN02865964	AQ	NA	NA	NA	NA	upper-body	NA	NA	female	1	NA	NA	NA	female	NA		NA	NA	NA	Negative	0	0	0	0	0	15	0
SRR1425476	77111850	15422370000	200	EQ	WGS	RANDOM	GENOMIC	PAIRED	ILLUMINA	Illumina HiSeq 2000	PRJNA252997	SAMN02865999	EQ	NA	NA	NA	NA	upper-body	NA	NA	female	1	NA	NA	NA	female	NA		NA	NA	NA	Negative	0	0	0	0	0	19	0
SRR1425460	75452672	15090534400	200	CQ	WGS	RANDOM	GENOMIC	PAIRED	ILLUMINA	Illumina HiSeq 2000	PRJNA252997	SAMN02865983	CQ	NA	NA	NA	NA	upper-body	NA	NA	female	1	NA	NA	NA	female	NA		NA	NA	NA	Negative	0	0	0	0	0	65	0
SRR10548564	66762702	20028810600	300	Larv09	WGS	unspecified	GENOMIC	PAIRED	ILLUMINA	Illumina NovaSeq 6000	PRJNA592273	SAMN13419559	Offspring_#09	RSA2017-287_2	SC 5	2/11/2018	South Africa: Stellenbosch	larva	NA	NA	female	NA	NA	NA	larval/pupal	female	NA		NA	NA	South Africa	Negative	0	0	0	0	0	0	141
SRR10548554	65949155	19784746500	300	Larv05	WGS	unspecified	GENOMIC	PAIRED	ILLUMINA	Illumina NovaSeq 6000	PRJNA592273	SAMN13419555	Offspring_#05	RSA2017-286_5	SC 5	2/11/2018	South Africa: Stellenbosch	larva	NA	NA	female	NA	NA	NA	larval/pupal	female	NA		NA	NA	South Africa	Negative	0	0	0	0	0	0	168
SRR10548562	63333639	19000091700	300	Larv11	WGS	unspecified	GENOMIC	PAIRED	ILLUMINA	Illumina NovaSeq 6000	PRJNA592273	SAMN13419561	Offspring_#11	RSA2017-287_4	SC 5	2/11/2018	South Africa: Stellenbosch	larva	NA	NA	female	NA	NA	NA	larval/pupal	female	NA		NA	NA	South Africa	Negative	0	0	0	0	0	0	167
SRR10548552	61741651	18522495300	300	Larv07	WGS	unspecified	GENOMIC	PAIRED	ILLUMINA	Illumina NovaSeq 6000	PRJNA592273	SAMN13419557	Offspring_#07	RSA2017-286_7	SC 5	2/11/2018	South Africa: Stellenbosch	larva	NA	NA	female	NA	NA	NA	larval/pupal	female	NA		NA	NA	South Africa	Negative	0	0	0	0	0	0	174
SRR1425454	61278024	12255604800	200	A48	WGS	RANDOM	GENOMIC	PAIRED	ILLUMINA	Illumina HiSeq 2000	PRJNA252997	SAMN02865977	A48	NA	NA	NA	NA	upper-body	NA	NA	male	1	NA	NA	NA	male	NA		NA	NA	NA	Negative	0	0	0	0	0	48	0
SRR10548556	59290292	17787087600	300	Larv03	WGS	unspecified	GENOMIC	PAIRED	ILLUMINA	Illumina NovaSeq 6000	PRJNA592273	SAMN13419553	Offspring_#03	RSA2017-286_3	SC 5	2/11/2018	South Africa: Stellenbosch	larva	NA	NA	female	NA	NA	NA	larval/pupal	female	NA		NA	NA	South Africa	Negative	0	0	0	0	0	0	167
SRR1425447	57797966	11559593200	200	A40	WGS	RANDOM	GENOMIC	PAIRED	ILLUMINA	Illumina HiSeq 2000	PRJNA252997	SAMN02865974	A40	NA	NA	NA	NA	upper-body	NA	NA	male	1	NA	NA	NA	male	NA		NA	NA	NA	Negative	0	0	0	0	0	32	0
SRR1425473	44463787	8892757400	200	C35	WGS	RANDOM	GENOMIC	PAIRED	ILLUMINA	Illumina HiSeq 2000	PRJNA252997	SAMN02865996	C35	NA	NA	NA	NA	upper-body	NA	NA	male	1	NA	NA	NA	male	NA		NA	NA	NA	Negative	0	0	0	0	0	26	0
SRR1425475	44067135	8813427000	200	C38	WGS	RANDOM	GENOMIC	PAIRED	ILLUMINA	Illumina HiSeq 2000	PRJNA252997	SAMN02865998	C38	NA	NA	NA	NA	upper-body	NA	NA	male	1	NA	NA	NA	male	NA		NA	NA	NA	Negative	0	0	0	0	0	57	0
SRR1425465	43941019	8788203800	200	C16	WGS	RANDOM	GENOMIC	PAIRED	ILLUMINA	Illumina HiSeq 2000	PRJNA252997	SAMN02865988	C16	NA	NA	NA	NA	upper-body	NA	NA	male	1	NA	NA	NA	male	NA		NA	NA	NA	Negative	0	0	0	0	0	13	0
SRR1425467	43702729	8740545800	200	C23	WGS	RANDOM	GENOMIC	PAIRED	ILLUMINA	Illumina HiSeq 2000	PRJNA252997	SAMN02865990	C23	NA	NA	NA	NA	upper-body	NA	NA	male	1	NA	NA	NA	male	NA		NA	NA	NA	Negative	0	0	0	0	0	50	0
SRR1425469	43634670	8726934000	200	C26	WGS	RANDOM	GENOMIC	PAIRED	ILLUMINA	Illumina HiSeq 2000	PRJNA252997	SAMN02865992	C26	NA	NA	NA	NA	upper-body	NA	NA	male	1	NA	NA	NA	male	NA		NA	NA	NA	Negative	0	0	0	0	0	55	0
SRR1425471	43530671	8706134200	200	C28	WGS	RANDOM	GENOMIC	PAIRED	ILLUMINA	Illumina HiSeq 2000	PRJNA252997	SAMN02865994	C28	NA	NA	NA	NA	upper-body	NA	NA	male	1	NA	NA	NA	male	NA		NA	NA	NA	Negative	0	0	0	0	0	58	0
SRR1425464	43460750	8692150000	200	C8	WGS	RANDOM	GENOMIC	PAIRED	ILLUMINA	Illumina HiSeq 2000	PRJNA252997	SAMN02865987	C8	NA	NA	NA	NA	upper-body	NA	NA	male	1	NA	NA	NA	male	NA		NA	NA	NA	Negative	0	0	0	0	0	38	0
SRR1425470	43272612	8654522400	200	C27	WGS	RANDOM	GENOMIC	PAIRED	ILLUMINA	Illumina HiSeq 2000	PRJNA252997	SAMN02865993	C27	NA	NA	NA	NA	upper-body	NA	NA	male	1	NA	NA	NA	male	NA		NA	NA	NA	Negative	0	0	0	0	0	56	0
SRR1425468	43095846	8619169200	200	C24	WGS	RANDOM	GENOMIC	PAIRED	ILLUMINA	Illumina HiSeq 2000	PRJNA252997	SAMN02865991	C24	NA	NA	NA	NA	upper-body	NA	NA	male	1	NA	NA	NA	male	NA		NA	NA	NA	Negative	0	0	0	0	0	51	0
SRR1425505	38959908	7791981600	200	EW24	WGS	RANDOM	GENOMIC	PAIRED	ILLUMINA	Illumina HiSeq 2000	PRJNA252997	SAMN02866017	EW24	NA	NA	NA	NA	upper-body	NA	NA	female	1	NA	NA	NA	female	NA		NA	NA	NA	Negative	0	0	0	0	0	42	0
SRR1425488	38485256	7697051200	200	ED21	WGS	RANDOM	GENOMIC	PAIRED	ILLUMINA	Illumina HiSeq 2000	PRJNA252997	SAMN02866009	ED21	NA	NA	NA	NA	upper-body	NA	NA	male	1	NA	NA	NA	male	NA		NA	NA	NA	Negative	0	0	0	0	0	17	0
SRR1425495	38078379	7615675800	200	EW8	WGS	RANDOM	GENOMIC	PAIRED	ILLUMINA	Illumina HiSeq 2000	PRJNA252997	SAMN02866014	EW8	NA	NA	NA	NA	upper-body	NA	NA	female	1	NA	NA	NA	female	NA		NA	NA	NA	Negative	0	0	0	0	0	23	0
SRR1425490	38057560	7611512000	200	ED22	WGS	RANDOM	GENOMIC	PAIRED	ILLUMINA	Illumina HiSeq 2000	PRJNA252997	SAMN02866010	ED22	NA	NA	NA	NA	upper-body	NA	NA	male	1	NA	NA	NA	male	NA		NA	NA	NA	Negative	0	0	0	0	0	27	0
SRR1425485	37841071	7568214200	200	ED17	WGS	RANDOM	GENOMIC	PAIRED	ILLUMINA	Illumina HiSeq 2000	PRJNA252997	SAMN02866007	ED17	NA	NA	NA	NA	upper-body	NA	NA	male	1	NA	NA	NA	male	NA		NA	NA	NA	Negative	0	0	0	0	0	15	0
SRR1425497	37813746	7562749200	200	EW9	WGS	RANDOM	GENOMIC	PAIRED	ILLUMINA	Illumina HiSeq 2000	PRJNA252997	SAMN02866015	EW9	NA	NA	NA	NA	upper-body	NA	NA	female	1	NA	NA	NA	female	NA		NA	NA	NA	Negative	0	0	0	0	0	62	0
SRR1425506	37760302	7552060400	200	EW29	WGS	RANDOM	GENOMIC	PAIRED	ILLUMINA	Illumina HiSeq 2000	PRJNA252997	SAMN02866018	EW29	NA	NA	NA	NA	upper-body	NA	NA	female	1	NA	NA	NA	female	NA		NA	NA	NA	Negative	0	0	0	0	0	32	0
SRR1425494	37756932	7551386400	200	EW2	WGS	RANDOM	GENOMIC	PAIRED	ILLUMINA	Illumina HiSeq 2000	PRJNA252997	SAMN02866013	EW2	NA	NA	NA	NA	upper-body	NA	NA	female	1	NA	NA	NA	female	NA		NA	NA	NA	Negative	0	0	0	0	0	12	0
SRR1425493	37751553	7550310600	200	ED30	WGS	RANDOM	GENOMIC	PAIRED	ILLUMINA	Illumina HiSeq 2000	PRJNA252997	SAMN02866012	ED30	NA	NA	NA	NA	upper-body	NA	NA	male	1	NA	NA	NA	male	NA		NA	NA	NA	Negative	0	0	0	0	0	15	0
SRR1425504	37744677	7548935400	200	EW16	WGS	RANDOM	GENOMIC	PAIRED	ILLUMINA	Illumina HiSeq 2000	PRJNA252997	SAMN02866016	EW16	NA	NA	NA	NA	upper-body	NA	NA	female	1	NA	NA	NA	female	NA		NA	NA	NA	Negative	0	0	0	0	0	24	0
SRR1425480	37651873	7530374600	200	ED6	WGS	RANDOM	GENOMIC	PAIRED	ILLUMINA	Illumina HiSeq 2000	PRJNA252997	SAMN02866003	ED6	NA	NA	NA	NA	upper-body	NA	NA	male	1	NA	NA	NA	male	NA		NA	NA	NA	Negative	0	0	0	0	0	16	0
SRR1425483	37629177	7525835400	200	ED16	WGS	RANDOM	GENOMIC	PAIRED	ILLUMINA	Illumina HiSeq 2000	PRJNA252997	SAMN02866006	ED16	NA	NA	NA	NA	upper-body	NA	NA	male	1	NA	NA	NA	male	NA		NA	NA	NA	Negative	0	0	0	0	0	36	0
SRR1425458	36811774	7362354800	200	A61	WGS	RANDOM	GENOMIC	PAIRED	ILLUMINA	Illumina HiSeq 2000	PRJNA252997	SAMN02865981	A61	NA	NA	NA	NA	upper-body	NA	NA	male	1	NA	NA	NA	male	NA		NA	NA	NA	Negative	0	0	0	0	0	13	0
SRR1425459	29054772	5810954400	200	B61	WGS	RANDOM	GENOMIC	PAIRED	ILLUMINA	Illumina HiSeq 2000	PRJNA252997	SAMN02865982	B61	NA	NA	NA	NA	upper-body	NA	NA	male	1	NA	NA	NA	male	NA		NA	NA	NA	Negative	0	0	0	0	0	14	0
SRR1425444	29014618	5802923600	200	A38	WGS	RANDOM	GENOMIC	PAIRED	ILLUMINA	Illumina HiSeq 2000	PRJNA252997	SAMN02865972	A38	NA	NA	NA	NA	upper-body	NA	NA	male	1	NA	NA	NA	male	NA		NA	NA	NA	Negative	0	0	0	0	0	8	0
SRR13312550	33403080	6747308256	201	S2825Nr7	WGS	RANDOM	METAGENOMIC	PAIRED	ILLUMINA	Illumina NovaSeq 6000	PRJNA688214	SAMN17170465	brw ey	Honeybee brw ey pupa	Comb	2020-07	Poland: Lubin	Intestine	pupa	NA	female	NA	NA	Intestine	larval/pupal	female	abdomen		NA	NA	Poland	Negative	0	0	0	0	0	120	0
SRR13312549	30630419	6187280758	201	S2825Nr8	WGS	RANDOM	METAGENOMIC	PAIRED	ILLUMINA	Illumina NovaSeq 6000	PRJNA688214	SAMN17170466	adult preecl	Honeybee adult, preecl.	Comb	2020-07	Poland: Lubin	Intestine	adult	NA	female	NA	NA	Intestine	adult	female	abdomen		NA	NA	Poland	Negative	0	0	0	0	0	133	0
SRR12097447	46295982	9319262506	201	A	WGS	RANDOM	METAGENOMIC	PAIRED	ILLUMINA	Illumina MiSeq	PRJNA642095	SAMN15376415	A	NA	NA	NA	NA	entire intestine (no crop)	adult	NA	female	2 day old	NA	NA	adult	female	abdomen		NA	NA	NA	Negative	0	0	0	0	0	303	0
SRR12097444	43654220	8784186078	201	D	WGS	RANDOM	METAGENOMIC	PAIRED	ILLUMINA	Illumina MiSeq	PRJNA642095	SAMN15376418	D	NA	NA	NA	NA	entire intestine (no crop)	adult	NA	female	2 day old	NA	NA	adult	female	abdomen		NA	NA	NA	Negative	0	0	0	0	0	236	0
SRR12097446	42221554	8498445770	201	B	WGS	RANDOM	METAGENOMIC	PAIRED	ILLUMINA	Illumina MiSeq	PRJNA642095	SAMN15376416	B	NA	NA	NA	NA	entire intestine (no crop)	adult	NA	female	2 day old	NA	NA	adult	female	abdomen		NA	NA	NA	Negative	0	0	0	0	0	281	0
SRR12097445	40158066	8079077732	201	C	WGS	RANDOM	METAGENOMIC	PAIRED	ILLUMINA	Illumina MiSeq	PRJNA642095	SAMN15376417	C	NA	NA	NA	NA	entire intestine (no crop)	adult	NA	female	2 day old	NA	NA	adult	female	abdomen		NA	NA	NA	Negative	0	0	0	0	0	192	0
SRR12726882	144675306	36168826500	250	POOL_14_GTGAAA_L007_	WGS	RANDOM	GENOMIC	PAIRED	ILLUMINA	Illumina HiSeq 2500	PRJNA666033	SAMN16277086	POOL_14	NA	hive	2015	Georgia: NE-Turkey	head	NA	NA	female	NA	NA	NA	NA	female	head		NA	NA	Georgia	Negative	0	0	0	0	0	82	0
SRR12726884	91709167	22927291750	250	POOL_8_ACAGTG_L005_	WGS	RANDOM	GENOMIC	PAIRED	ILLUMINA	Illumina HiSeq 2500	PRJNA666033	SAMN16277080	POOL_8	NA	hive	2015	Slovenia: Croatia	head	NA	NA	female	NA	NA	NA	NA	female	head		NA	NA	Slovenia	Negative	0	0	0	0	0	81	0
SRR12726887	89331174	22332793500	250	POOL_9_GTGAAA_L008_	WGS	RANDOM	GENOMIC	PAIRED	ILLUMINA	Illumina HiSeq 2500	PRJNA666033	SAMN16277081	POOL_9	NA	hive	2015	Italy	head	NA	NA	female	NA	NA	NA	NA	female	head		NA	NA	Italy	Negative	0	0	0	0	0	111	0
SRR12726921	86344775	21586193750	250	POOL_0_GCCAAT_L008_	WGS	RANDOM	GENOMIC	PAIRED	ILLUMINA	Illumina HiSeq 2500	PRJNA666033	SAMN16277072	POOL_0	NA	hive	2015	Spain: Basque country	head	NA	NA	female	NA	NA	NA	NA	female	head		NA	NA	Spain	Negative	0	0	0	0	0	103	0
SRR12726919	86268019	21567004750	250	Pool4_GTGAAA_L005_	WGS	RANDOM	GENOMIC	PAIRED	ILLUMINA	Illumina HiSeq 2500	PRJNA666033	SAMN16277076	POOL_4	NA	hive	2015	Ireland	head	NA	NA	female	NA	NA	NA	NA	female	head		NA	NA	Ireland	Negative	0	0	0	0	0	79	0
SRR14703829	73833062	22297584724	302	Aada_bur7	WGS	RANDOM	GENOMIC	PAIRED	ILLUMINA	HiSeq X Five	PRJNA729035	SAMN19109591	Aada_bur7	Apis_mellifera_Aada_bur7	Not Applicable	Not Collected	Burkina Faso: Kurkina	1/2 head	Adult	NA	female	NA	NA	NA	adult	female	head		NA	NA	Burkina Faso	Negative	0	0	0	0	0	0	231
SRR14703807	73520076	22203062952	302	Aada_bur9	WGS	RANDOM	GENOMIC	PAIRED	ILLUMINA	HiSeq X Five	PRJNA729035	SAMN19109593	Aada_bur9	Apis_mellifera_Aada_bur9	Not Applicable	Not Collected	Burkina Faso: Kurkina	1/2 head	Adult	NA	female	NA	NA	NA	adult	female	head		NA	NA	Burkina Faso	Negative	0	0	0	0	0	42	89
SRR14703897	72896314	22014686828	302	Aada_bur4	WGS	RANDOM	GENOMIC	PAIRED	ILLUMINA	HiSeq X Five	PRJNA729035	SAMN19109588	Aada_bur4	Apis_mellifera_Aada_bur4	Not Applicable	Not Collected	Burkina Faso: Kurkina	1/2 head	Adult	NA	female	NA	NA	NA	adult	female	head		NA	NA	Burkina Faso	Negative	0	0	0	0	0	0	265
SRR14703898	72479368	21888769136	302	Aada_bur2	WGS	RANDOM	GENOMIC	PAIRED	ILLUMINA	HiSeq X Five	PRJNA729035	SAMN19109587	Aada_bur2	Apis_mellifera_Aada_bur2	Not Applicable	Not Collected	Burkina Faso: Kurkina	1/2 head	Adult	NA	female	NA	NA	NA	adult	female	head		NA	NA	Burkina Faso	Negative	0	0	0	0	0	0	132
SRR14703851	67431947	20364447994	302	Aada_bur5	WGS	RANDOM	GENOMIC	PAIRED	ILLUMINA	HiSeq X Five	PRJNA729035	SAMN19109589	Aada_bur5	Apis_mellifera_Aada_bur5	Not Applicable	Not Collected	Burkina Faso: Kurkina	1/2 head	Adult	NA	female	NA	NA	NA	adult	female	head		NA	NA	Burkina Faso	Negative	0	0	0	0	0	38	272
SRR14703840	63296484	19115538168	302	Aada_bur6	WGS	RANDOM	GENOMIC	PAIRED	ILLUMINA	HiSeq X Five	PRJNA729035	SAMN19109590	Aada_bur6	Apis_mellifera_Aada_bur6	Not Applicable	Not Collected	Burkina Faso: Kurkina	1/2 head	Adult	NA	female	NA	NA	NA	adult	female	head		NA	NA	Burkina Faso	Negative	0	0	0	0	0	75	172
SRR12726877	49077135	12269283750	250	POOL_21_CCGTCC_L008_	WGS	RANDOM	GENOMIC	PAIRED	ILLUMINA	Illumina HiSeq 2500	PRJNA666033	SAMN16277093	POOL_21	NA	hive	2015	Malta	head	NA	NA	female	NA	NA	NA	NA	female	head		NA	NA	Malta	Negative	0	0	0	0	0	57	37
SRR12726889	47713013	11928253250	250	POOL_10_ACAGTG_L002_	WGS	RANDOM	GENOMIC	PAIRED	ILLUMINA	Illumina HiSeq 2500	PRJNA666033	SAMN16277082	POOL_10	NA	hive	2015	Denmark	head	NA	NA	female	NA	NA	NA	NA	female	head		NA	NA	Denmark	Negative	0	0	0	0	0	98	0
SRR12726891	47285956	11821489000	250	POOL_10_ACAGTG_L003_	WGS	RANDOM	GENOMIC	PAIRED	ILLUMINA	Illumina HiSeq 2500	PRJNA666033	SAMN16277082	POOL_10	NA	hive	2015	Denmark	head	NA	NA	female	NA	NA	NA	NA	female	head		NA	NA	Denmark	Negative	0	0	0	0	0	91	0
SRR12726893	47079557	11769889250	250	POOL_15_GCCAAT_L001_	WGS	RANDOM	GENOMIC	PAIRED	ILLUMINA	Illumina HiSeq 2500	PRJNA666033	SAMN16277087	POOL_15	NA	hive	2015	Switzerland	head	NA	NA	female	NA	NA	NA	NA	female	head		NA	NA	Switzerland	Negative	0	0	0	0	0	117	0
SRR12726888	45386895	11346723750	250	POOL_10_ACAGTG_L001_	WGS	RANDOM	GENOMIC	PAIRED	ILLUMINA	Illumina HiSeq 2500	PRJNA666033	SAMN16277082	POOL_10	NA	hive	2015	Denmark	head	NA	NA	female	NA	NA	NA	NA	female	head		NA	NA	Denmark	Negative	0	0	0	0	0	122	0
SRR12726906	44844885	11211221250	250	POOL_18_CGATGT_L005_	WGS	RANDOM	GENOMIC	PAIRED	ILLUMINA	Illumina HiSeq 2500	PRJNA666033	SAMN16277090	POOL_18	NA	hive	2015	Turkey	head	NA	NA	female	NA	NA	NA	NA	female	head		NA	NA	Turkey	Negative	0	0	0	0	0	84	0
SRR12726922	44525398	11131349500	250	POOL_11_GCCAAT_L006_	WGS	RANDOM	GENOMIC	PAIRED	ILLUMINA	Illumina HiSeq 2500	PRJNA666033	SAMN16277083	POOL_11	NA	hive	2015	Greece: Crete	head	NA	NA	female	NA	NA	NA	NA	female	head		NA	NA	Greece	Negative	0	0	0	0	0	114	0
SRR14703878	29014849	8762484398	302	Auni_mad11	WGS	RANDOM	GENOMIC	PAIRED	ILLUMINA	HiSeq X Five	PRJNA729035	SAMN19109634	Auni_mad11	Apis_mellifera_Auni_mad11	Not Applicable	2009	Madagascar	1/2 head	Adult	NA	female	NA	NA	NA	adult	female	head		NA	NA	Madagascar	Negative	0	0	0	0	0	6	28
SRR14703876	25691705	7758894910	302	Auni_mad12	WGS	RANDOM	GENOMIC	PAIRED	ILLUMINA	HiSeq X Five	PRJNA729035	SAMN19109635	Auni_mad12	Apis_mellifera_Auni_mad12	Not Applicable	2009	Madagascar	1/2 head	Adult	NA	female	NA	NA	NA	adult	female	head		NA	NA	Madagascar	Negative	0	0	0	0	0	0	63
SRR14703879	21948520	6628453040	302	Auni_mad10	WGS	RANDOM	GENOMIC	PAIRED	ILLUMINA	HiSeq X Five	PRJNA729035	SAMN19109633	Auni_mad10	Apis_mellifera_Auni_mad10	Not Applicable	2009	Madagascar	1/2 head	Adult	NA	female	NA	NA	NA	adult	female	head		NA	NA	Madagascar	Negative	0	0	0	0	0	22	15
SRR14703818	74702718	22560220836	302	Aada_bur8	WGS	RANDOM	GENOMIC	PAIRED	ILLUMINA	HiSeq X Five	PRJNA729035	SAMN19109592	Aada_bur8	Apis_mellifera_Aada_bur8	Not Applicable	Not Collected	Burkina Faso: Kurkina	1/2 head	Adult	NA	female	NA	NA	NA	adult	female	head		NA	NA	Burkina Faso	Negative	0	0	0	0	0	208	603
SRR10507239	72071804	18017951000	250	CBTAPANXX_GTGAAACG	WGS	PCR	GENOMIC	PAIRED	ILLUMINA	Illumina HiSeq 2500	PRJNA521424	SAMN10887833	Apis mellifera capensis queens	NA	Honey bee colony	2016	South Africa: Stellenbosch	Abdomen	NA	NA	NA	NA	NA	NA	NA	NA	abdomen		NA	NA	South Africa	Negative	0	0	0	0	0	88	114
SRR10507237	70077632	17519408000	250	CBTAPANXX_GTTTCGGA	WGS	PCR	GENOMIC	PAIRED	ILLUMINA	Illumina HiSeq 2500	PRJNA521424	SAMN10887833	Apis mellifera capensis queens	NA	Honey bee colony	2016	South Africa: Stellenbosch	Abdomen	NA	NA	NA	NA	NA	NA	NA	NA	abdomen		NA	NA	South Africa	Negative	0	0	0	0	0	63	99
SRR11485289	85454891	21363722750	250	B4W1	WGS	unspecified	GENOMIC	PAIRED	ILLUMINA	Illumina HiSeq 2500	PRJNA623232	SAMN14542476	Thorax_Patriline1_ColB4	B4W1	ColonyB4	11/22/2017	Australia: Sydney	Thorax	Adult	NA	female	NA	NA	NA	adult	female	thorax		NA	NA	Australia	Negative	0	0	0	0	0	0	0
SRR11485288	85418268	21354567000	250	B4W4	WGS	unspecified	GENOMIC	PAIRED	ILLUMINA	Illumina HiSeq 2500	PRJNA623232	SAMN14542477	Thorax_Patriline4_ColB4	B4W4	ColonyB4	11/22/2017	Australia: Sydney	Thorax	Adult	NA	female	NA	NA	NA	adult	female	thorax		NA	NA	Australia	Negative	0	0	0	0	0	0	0
SRR11485294	41521353	10380338250	250	B1W4	WGS	unspecified	GENOMIC	PAIRED	ILLUMINA	Illumina HiSeq 2500	PRJNA623232	SAMN14542471	Thorax_Patriline4_ColB1	B1W4	ColonyB1	11/22/2017	Australia: Sydney	Thorax	Adult	NA	female	NA	NA	NA	adult	female	thorax		NA	NA	Australia	Negative	0	0	0	0	0	0	0
SRR11485292	41481234	10370308500	250	B2W2	WGS	unspecified	GENOMIC	PAIRED	ILLUMINA	Illumina HiSeq 2500	PRJNA623232	SAMN14542473	Thorax_Patriline2_ColB2	B2W2	ColonyB2	11/22/2017	Australia: Sydney	Thorax	Adult	NA	female	NA	NA	NA	adult	female	thorax		NA	NA	Australia	Negative	0	0	0	0	0	2	0
SRR11485296	38966642	9741660500	250	B1W2	WGS	unspecified	GENOMIC	PAIRED	ILLUMINA	Illumina HiSeq 2500	PRJNA623232	SAMN14542469	Thorax_Patriline2_ColB1	B1W2	ColonyB1	11/22/2017	Australia: Sydney	Thorax	Adult	NA	female	NA	NA	NA	adult	female	thorax		NA	NA	Australia	Negative	0	0	0	0	0	0	0
SRR11485297	38350136	9587534000	250	B1W1	WGS	unspecified	GENOMIC	PAIRED	ILLUMINA	Illumina HiSeq 2500	PRJNA623232	SAMN14542468	Thorax_Patriline1_ColB1	B1W1	ColonyB1	11/22/2017	Australia: Sydney	Thorax	Adult	NA	female	NA	NA	NA	adult	female	thorax		NA	NA	Australia	Negative	0	0	0	0	0	0	0
SRR11485290	37635140	9408785000	250	B2W4	WGS	unspecified	GENOMIC	PAIRED	ILLUMINA	Illumina HiSeq 2500	PRJNA623232	SAMN14542475	Thorax_Patriline4_ColB2	B2W4	ColonyB2	11/22/2017	Australia: Sydney	Thorax	Adult	NA	female	NA	NA	NA	adult	female	thorax		NA	NA	Australia	Negative	0	0	0	0	0	0	0
SRR11485293	37568182	9392045500	250	B2W1	WGS	unspecified	GENOMIC	PAIRED	ILLUMINA	Illumina HiSeq 2500	PRJNA623232	SAMN14542472	Thorax_Patriline1_ColB2	B2W1	ColonyB2	11/22/2017	Australia: Sydney	Thorax	Adult	NA	female	NA	NA	NA	adult	female	thorax		NA	NA	Australia	Negative	0	0	0	0	0	0	0
SRR11485291	37023019	9255754750	250	B2W3	WGS	unspecified	GENOMIC	PAIRED	ILLUMINA	Illumina HiSeq 2500	PRJNA623232	SAMN14542474	Thorax_Patriline3_ColB2	B2W3	ColonyB2	11/22/2017	Australia: Sydney	Thorax	Adult	NA	female	NA	NA	NA	adult	female	thorax		NA	NA	Australia	Negative	0	0	0	0	0	0	0
SRR11485295	36278037	9069509250	250	B1W3	WGS	unspecified	GENOMIC	PAIRED	ILLUMINA	Illumina HiSeq 2500	PRJNA623232	SAMN14542470	Thorax_Patriline3_ColB1	B1W3	ColonyB1	11/22/2017	Australia: Sydney	Thorax	Adult	NA	female	NA	NA	NA	adult	female	thorax		NA	NA	Australia	Negative	0	0	0	0	0	2	0
SRR2032611	211604151	40486581564	191	EA Queen 2	WGS	unspecified	GENOMIC	PAIRED	ILLUMINA	Illumina HiSeq 2000	PRJNA277772	SAMN03396600	EA Queen 2	EA Queen 2	NA	4/17/2008	NA	whole body	adult	NA	female	NA	NA	NA	adult	female	whole body	y	NA	NA	NA	Negative	0	0	0	0	0	237	0
SRR2032609	57474649	11609879098	202	AE_Queen_1	WGS	unspecified	GENOMIC	PAIRED	ILLUMINA	Illumina HiSeq 2000	PRJNA277772	SAMN03396599	AE Queen 1	AE Queen 1	NA	4/17/2008	NA	whole body	adult	NA	female	NA	NA	NA	adult	female	whole body	y	NA	NA	NA	Negative	0	0	0	0	0	0	0
SRR14703895	73034236	22056339272	302	Ascu_RSA281	WGS	RANDOM	GENOMIC	PAIRED	ILLUMINA	HiSeq X Five	PRJNA729035	SAMN19109700	Ascu_RSA281	Apis_mellifera_Ascu_RSA281	Not Applicable	Not Collected	South Africa	1/2 Thorax	Adult	NA	male	NA	NA	NA	adult	male	thorax		NA	NA	South Africa	Negative	0	0	0	0	0	351	0
SRR14703852	69083388	20863183176	302	Acap_RSA331	WGS	RANDOM	GENOMIC	PAIRED	ILLUMINA	HiSeq X Five	PRJNA729035	SAMN19109697	Acap_RSA331	Apis_mellifera_Acap_RSA331	Not Applicable	Not Collected	South Africa	1/2 Thorax	Adult	NA	male	NA	NA	NA	adult	male	thorax		NA	NA	South Africa	Negative	0	0	0	0	0	279	126
SRR11485298	46454574	11613643500	250	B1S3	WGS	unspecified	GENOMIC	PAIRED	ILLUMINA	Illumina HiSeq 2500	PRJNA623232	SAMN14542450	Semen_Drone3_ColB1	B1S3	Wild caught	9/24/2017	Australia: Sydney	Semen	Adult	NA	male	NA	NA	NA	adult	male	NA		NA	NA	Australia	Negative	0	0	0	0	0	0	0
SRR11485310	44611896	11152974000	250	B1S1	WGS	unspecified	GENOMIC	PAIRED	ILLUMINA	Illumina HiSeq 2500	PRJNA623232	SAMN14542448	Semen_Drone1_ColB1	B1S1	Wild caught	9/24/2017	Australia: Sydney	Semen	Adult	NA	male	NA	NA	NA	adult	male	NA		NA	NA	Australia	Negative	0	0	0	0	0	0	0
SRR11485286	44038123	11009530750	250	B2S1	WGS	unspecified	GENOMIC	PAIRED	ILLUMINA	Illumina HiSeq 2500	PRJNA623232	SAMN14542452	Semen_Drone1_ColB2	B2S1	Wild caught	9/24/2017	Australia: Sydney	Semen	Adult	NA	male	NA	NA	NA	adult	male	NA		NA	NA	Australia	Negative	0	0	0	0	0	0	0
SRR11485287	43115707	10778926750	250	B1S4	WGS	unspecified	GENOMIC	PAIRED	ILLUMINA	Illumina HiSeq 2500	PRJNA623232	SAMN14542451	Semen_Drone4_ColB1	B1S4	Wild caught	9/24/2017	Australia: Sydney	Semen	Adult	NA	male	NA	NA	NA	adult	male	NA		NA	NA	Australia	Negative	0	0	0	0	0	0	0
SRR11485309	39252469	9813117250	250	B1S2	WGS	unspecified	GENOMIC	PAIRED	ILLUMINA	Illumina HiSeq 2500	PRJNA623232	SAMN14542449	Semen_Drone2_ColB1	B1S2	Wild caught	9/24/2017	Australia: Sydney	Semen	Adult	NA	male	NA	NA	NA	adult	male	NA		NA	NA	Australia	Negative	0	0	0	0	0	3	0
SRR11485284	39227024	9806756000	250	B2S3	WGS	unspecified	GENOMIC	PAIRED	ILLUMINA	Illumina HiSeq 2500	PRJNA623232	SAMN14542454	Semen_Drone3_ColB2	B2S3	Wild caught	9/24/2017	Australia: Sydney	Semen	Adult	NA	male	NA	NA	NA	adult	male	NA		NA	NA	Australia	Negative	0	0	0	0	0	0	0
SRR11485283	37326856	9331714000	250	B2S4	WGS	unspecified	GENOMIC	PAIRED	ILLUMINA	Illumina HiSeq 2500	PRJNA623232	SAMN14542455	Semen_Drone4_ColB2	B2S4	Wild caught	9/24/2017	Australia: Sydney	Semen	Adult	NA	male	NA	NA	NA	adult	male	NA		NA	NA	Australia	Negative	0	0	0	0	0	0	0
SRR11485285	36663115	9165778750	250	B2S2	WGS	unspecified	GENOMIC	PAIRED	ILLUMINA	Illumina HiSeq 2500	PRJNA623232	SAMN14542453	Semen_Drone2_ColB2	B2S2	Wild caught	9/24/2017	Australia: Sydney	Semen	Adult	NA	male	NA	NA	NA	adult	male	NA		NA	NA	Australia	Negative	0	0	0	0	0	0	0
SRR11485302	36349775	9087443750	250	B4S1	WGS	unspecified	GENOMIC	PAIRED	ILLUMINA	Illumina HiSeq 2500	PRJNA623232	SAMN14542464	Semen_Drone1_ColB4	B4S1	Wild caught	9/24/2017	Australia: Sydney	Semen	Adult	NA	male	NA	NA	NA	adult	male	NA		NA	NA	Australia	Negative	0	0	0	0	0	0	0
SRR11485301	36348773	9087193250	250	B4S4	WGS	unspecified	GENOMIC	PAIRED	ILLUMINA	Illumina HiSeq 2500	PRJNA623232	SAMN14542465	Semen_Drone4_ColB4	B4S4	Wild caught	9/24/2017	Australia: Sydney	Semen	Adult	NA	male	NA	NA	NA	adult	male	NA		NA	NA	Australia	Negative	0	0	0	0	0	0	0
SRR11485307	41460721	10365180250	250	B1D4	WGS	unspecified	GENOMIC	PAIRED	ILLUMINA	Illumina HiSeq 2500	PRJNA623232	SAMN14542459	Thorax_Drone4_ColB1	B1D4	Wild caught	9/24/2017	Australia: Sydney	Thorax	Adult	NA	male	NA	NA	NA	adult	male	thorax		NA	NA	Australia	Negative	0	0	0	0	0	0	0
SRR11485305	41447707	10361926750	250	B2D2	WGS	unspecified	GENOMIC	PAIRED	ILLUMINA	Illumina HiSeq 2500	PRJNA623232	SAMN14542461	Thorax_Drone2_ColB2	B2D2	Wild caught	9/24/2017	Australia: Sydney	Thorax	Adult	NA	male	NA	NA	NA	adult	male	thorax		NA	NA	Australia	Negative	0	0	0	0	0	0	0
SRR11485308	40881990	10220497500	250	B1D3	WGS	unspecified	GENOMIC	PAIRED	ILLUMINA	Illumina HiSeq 2500	PRJNA623232	SAMN14542458	Thorax_Drone3_ColB1	B1D3	Wild caught	9/24/2017	Australia: Sydney	Thorax	Adult	NA	male	NA	NA	NA	adult	male	thorax		NA	NA	Australia	Negative	0	0	0	0	0	0	0
SRR11485304	38687265	9671816250	250	B2D3	WGS	unspecified	GENOMIC	PAIRED	ILLUMINA	Illumina HiSeq 2500	PRJNA623232	SAMN14542462	Thorax_Drone3_ColB2	B2D3	Wild caught	9/24/2017	Australia: Sydney	Thorax	Adult	NA	male	NA	NA	NA	adult	male	thorax		NA	NA	Australia	Negative	0	0	0	0	0	0	0
SRR11485299	38352850	9588212500	250	B4D4	WGS	unspecified	GENOMIC	PAIRED	ILLUMINA	Illumina HiSeq 2500	PRJNA623232	SAMN14542467	Thorax_Drone4_ColB4	B4D4	Wild caught	9/24/2017	Australia: Sydney	Thorax	Adult	NA	male	NA	NA	NA	adult	male	thorax		NA	NA	Australia	Negative	0	0	0	0	0	0	0
SRR11485303	37694667	9423666750	250	B2D4	WGS	unspecified	GENOMIC	PAIRED	ILLUMINA	Illumina HiSeq 2500	PRJNA623232	SAMN14542463	Thorax_Drone4_ColB2	B2D4	Wild caught	9/24/2017	Australia: Sydney	Thorax	Adult	NA	male	NA	NA	NA	adult	male	thorax		NA	NA	Australia	Negative	0	0	0	0	0	2	0
SRR11485306	37491343	9372835750	250	B2D1	WGS	unspecified	GENOMIC	PAIRED	ILLUMINA	Illumina HiSeq 2500	PRJNA623232	SAMN14542460	Thorax_Drone1_ColB2	B2D1	Wild caught	9/24/2017	Australia: Sydney	Thorax	Adult	NA	male	NA	NA	NA	adult	male	thorax		NA	NA	Australia	Negative	0	0	0	0	0	0	0
SRR11485281	35695778	8923944500	250	B1D2	WGS	unspecified	GENOMIC	PAIRED	ILLUMINA	Illumina HiSeq 2500	PRJNA623232	SAMN14542457	Thorax_Drone2_ColB1	B1D2	Wild caught	9/24/2017	Australia: Sydney	Thorax	Adult	NA	male	NA	NA	NA	adult	male	thorax		NA	NA	Australia	Negative	0	0	0	0	0	0	0
SRR11485300	35116039	8779009750	250	B4D1	WGS	unspecified	GENOMIC	PAIRED	ILLUMINA	Illumina HiSeq 2500	PRJNA623232	SAMN14542466	Thorax_Drone1_ColB4	B4D1	Wild caught	9/24/2017	Australia: Sydney	Thorax	Adult	NA	male	NA	NA	NA	adult	male	thorax		NA	NA	Australia	Negative	0	0	0	0	0	0	0
SRR11485282	33701567	8425391750	250	B1D1	WGS	unspecified	GENOMIC	PAIRED	ILLUMINA	Illumina HiSeq 2500	PRJNA623232	SAMN14542456	Thorax_Drone1_ColB1	B1D1	Wild caught	9/24/2017	Australia: Sydney	Thorax	Adult	NA	male	NA	NA	NA	adult	male	thorax		NA	NA	Australia	Negative	0	0	0	0	0	0	0
SRR7528868	20161852	6088879304	302	EF_3.9	WGS	RANDOM	GENOMIC	PAIRED	ILLUMINA	Illumina HiSeq 4000	PRJNA481428	SAMN09667789	EF_3.9	EF_3.9	Mt Elgon, Kenya	2016	Kenya: Africa	Leg	Adult	NA	NA	NA	NA	NA	adult	NA	thorax		NA	NA	Kenya	Negative	0	0	0	0	0	0	0
SRR7528866	19064787	5757565674	302	EF_3.3	WGS	RANDOM	GENOMIC	PAIRED	ILLUMINA	Illumina HiSeq 4000	PRJNA481428	SAMN09667787	EF_3.3	EF_3.3	Mt Elgon, Kenya	2016	Kenya: Africa	Leg	Adult	NA	NA	NA	NA	NA	adult	NA	thorax		NA	NA	Kenya	Negative	0	0	0	0	0	21	86
SRR7528864	15318510	4626190020	302	EF_2.7	WGS	RANDOM	GENOMIC	PAIRED	ILLUMINA	Illumina HiSeq 4000	PRJNA481428	SAMN09667785	EF_2.7	EF_2.7	Mt Elgon, Kenya	2016	Kenya: Africa	Leg	Adult	NA	NA	NA	NA	NA	adult	NA	thorax		NA	NA	Kenya	Negative	0	0	0	0	0	36	170
SRR7528867	13075459	3948788618	302	EF_3.8	WGS	RANDOM	GENOMIC	PAIRED	ILLUMINA	Illumina HiSeq 4000	PRJNA481428	SAMN09667788	EF_3.8	EF_3.8	Mt Elgon, Kenya	2016	Kenya: Africa	Leg	Adult	NA	NA	NA	NA	NA	adult	NA	thorax		NA	NA	Kenya	Negative	0	0	0	0	0	5	119
SRR10548563	71449405	21434821500	300	Larv10	WGS	unspecified	GENOMIC	PAIRED	ILLUMINA	Illumina NovaSeq 6000	PRJNA592273	SAMN13419560	Offspring_#10	RSA2017-287_3	SC 5	2/11/2018	South Africa: Stellenbosch	larva	NA	NA	female	NA	NA	NA	larval/pupal	female	NA		NA	NA	South Africa	Negative	0	0	0	0	0	0	0
SRR10571958	67322066	20196619800	300	10_P1_F9	WGS	unspecified	GENOMIC	PAIRED	ILLUMINA	Illumina NovaSeq 6000	PRJNA592197	SAMN13415888	Backcross_offspring#10	RSA2017_248_4	RSA2017_248	1/29/2018	South Africa: Stellenbosch	larva	NA	NA	female	NA	NA	NA	larval/pupal	female	NA		NA	NA	South Africa	Negative	0	0	0	0	0	0	0
SRR10571994	65679969	19703990700	300	25_P3_G8	WGS	unspecified	GENOMIC	PAIRED	ILLUMINA	Illumina NovaSeq 6000	PRJNA592197	SAMN13415902	Backcross_offspring#25	RSA2017_248_18	RSA2017_248	1/29/2018	South Africa: Stellenbosch	larva	NA	NA	female	NA	NA	NA	larval/pupal	female	NA		NA	NA	South Africa	Negative	0	0	0	0	0	108	257
SRR10571976	61748432	18524529600	300	5_P1_B1	WGS	unspecified	GENOMIC	PAIRED	ILLUMINA	Illumina NovaSeq 6000	PRJNA592197	SAMN13415883	Backcross_offspring#5	RSA2017_247_1	RSA2017_247	1/29/2018	South Africa: Stellenbosch	larva	NA	NA	female	NA	NA	NA	larval/pupal	female	NA		NA	NA	South Africa	Negative	0	0	0	0	0	0	0
SRR10548551	61095810	18328743000	300	Larv08	WGS	unspecified	GENOMIC	PAIRED	ILLUMINA	Illumina NovaSeq 6000	PRJNA592273	SAMN13419558	Offspring_#08	RSA2017-287_1	SC 5	2/11/2018	South Africa: Stellenbosch	larva	NA	NA	female	NA	NA	NA	larval/pupal	female	NA		NA	NA	South Africa	Negative	0	0	0	0	0	0	357
SRR10548559	59799030	17939709000	300	Larv14	WGS	unspecified	GENOMIC	PAIRED	ILLUMINA	Illumina NovaSeq 6000	PRJNA592273	SAMN13419564	Offspring_#14	RSA2017-287_7	SC 5	2/11/2018	South Africa: Stellenbosch	larva	NA	NA	female	NA	NA	NA	larval/pupal	female	NA		NA	NA	South Africa	Negative	0	0	0	0	0	0	339
SRR10548553	58642762	17592828600	300	Larv06	WGS	unspecified	GENOMIC	PAIRED	ILLUMINA	Illumina NovaSeq 6000	PRJNA592273	SAMN13419556	Offspring_#06	RSA2017-286_6	SC 5	2/11/2018	South Africa: Stellenbosch	larva	NA	NA	female	NA	NA	NA	larval/pupal	female	NA		NA	NA	South Africa	Negative	0	0	0	0	0	0	370
SRR10571968	58331087	17499326100	300	49_P5_D3	WGS	unspecified	GENOMIC	PAIRED	ILLUMINA	Illumina NovaSeq 6000	PRJNA592197	SAMN13415926	Backcross_offspring#49	MA June 18_1_6	MA June 18_1	3/3/2018	South Africa: Stellenbosch	larva	NA	NA	female	NA	NA	NA	larval/pupal	female	NA		NA	NA	South Africa	Negative	0	0	0	0	0	104	297
SRR10548561	57848834	17354650200	300	Larv12	WGS	unspecified	GENOMIC	PAIRED	ILLUMINA	Illumina NovaSeq 6000	PRJNA592273	SAMN13419562	Offspring_#12	RSA2017-287_5	SC 5	2/11/2018	South Africa: Stellenbosch	larva	NA	NA	female	NA	NA	NA	larval/pupal	female	NA		NA	NA	South Africa	Negative	0	0	0	0	0	0	337
SRR10571973	57783892	17335167600	300	44_P5_A6	WGS	unspecified	GENOMIC	PAIRED	ILLUMINA	Illumina NovaSeq 6000	PRJNA592197	SAMN13415921	Backcross_offspring#44	MA June 18_1_1	MA June 18_1	3/3/2018	South Africa: Stellenbosch	larva	NA	NA	female	NA	NA	NA	larval/pupal	female	NA		NA	NA	South Africa	Negative	0	0	0	0	0	92	255
SRR10571963	56679930	17003979000	300	53_P5_F6	WGS	unspecified	GENOMIC	PAIRED	ILLUMINA	Illumina NovaSeq 6000	PRJNA592197	SAMN13415930	Backcross_offspring#53	MA June 18_1_10	MA June 18_1	3/3/2018	South Africa: Stellenbosch	larva	NA	NA	female	NA	NA	NA	larval/pupal	female	NA		NA	NA	South Africa	Negative	0	0	0	0	0	92	255
SRR10571967	56669855	17000956500	300	50_P5_D8	WGS	unspecified	GENOMIC	PAIRED	ILLUMINA	Illumina NovaSeq 6000	PRJNA592197	SAMN13415927	Backcross_offspring#50	MA June 18_1_7	MA June 18_1	3/3/2018	South Africa: Stellenbosch	larva	NA	NA	female	NA	NA	NA	larval/pupal	female	NA		NA	NA	South Africa	Negative	0	0	0	0	0	132	297
SRR10571975	56043940	16813182000	300	42_P4_G9	WGS	unspecified	GENOMIC	PAIRED	ILLUMINA	Illumina NovaSeq 6000	PRJNA592197	SAMN13415919	Backcross_offspring#42	RSA2017_248_35	RSA2017_248	1/29/2018	South Africa: Stellenbosch	larva	NA	NA	female	NA	NA	NA	larval/pupal	female	NA		NA	NA	South Africa	Negative	0	0	0	0	0	92	267
SRR10571990	55905921	16771776300	300	29_P4_A8	WGS	unspecified	GENOMIC	PAIRED	ILLUMINA	Illumina NovaSeq 6000	PRJNA592197	SAMN13415906	Backcross_offspring#29	RSA2017_248_22	RSA2017_248	1/29/2018	South Africa: Stellenbosch	larva	NA	NA	female	NA	NA	NA	larval/pupal	female	NA		NA	NA	South Africa	Negative	0	0	0	0	0	0	0
SRR10571970	55876061	16762818300	300	47_P5_B11	WGS	unspecified	GENOMIC	PAIRED	ILLUMINA	Illumina NovaSeq 6000	PRJNA592197	SAMN13415924	Backcross_offspring#47	MA June 18_1_4	MA June 18_1	3/3/2018	South Africa: Stellenbosch	larva	NA	NA	female	NA	NA	NA	larval/pupal	female	NA		NA	NA	South Africa	Negative	0	0	0	0	0	140	228
SRR10571964	54032853	16209855900	300	52_P5_F2	WGS	unspecified	GENOMIC	PAIRED	ILLUMINA	Illumina NovaSeq 6000	PRJNA592197	SAMN13415929	Backcross_offspring#52	MA June 18_1_9	MA June 18_1	3/3/2018	South Africa: Stellenbosch	larva	NA	NA	female	NA	NA	NA	larval/pupal	female	NA		NA	NA	South Africa	Negative	0	0	0	0	0	87	252
SRR10571971	52246767	15674030100	300	46_P5_A8	WGS	unspecified	GENOMIC	PAIRED	ILLUMINA	Illumina NovaSeq 6000	PRJNA592197	SAMN13415923	Backcross_offspring#46	MA June 18_1_3	MA June 18_1	3/3/2018	South Africa: Stellenbosch	larva	NA	NA	female	NA	NA	NA	larval/pupal	female	NA		NA	NA	South Africa	Negative	0	0	0	0	0	107	280
SRR10571982	50971718	15291515400	300	36_P4_D9	WGS	unspecified	GENOMIC	PAIRED	ILLUMINA	Illumina NovaSeq 6000	PRJNA592197	SAMN13415913	Backcross_offspring#36	RSA2017_248_29	RSA2017_248	1/29/2018	South Africa: Stellenbosch	larva	NA	NA	female	NA	NA	NA	larval/pupal	female	NA		NA	NA	South Africa	Negative	0	0	0	0	0	164	254
SRR10571966	50846294	15253888200	300	51_P5_E8	WGS	unspecified	GENOMIC	PAIRED	ILLUMINA	Illumina NovaSeq 6000	PRJNA592197	SAMN13415928	Backcross_offspring#51	MA June 18_1_8	MA June 18_1	3/3/2018	South Africa: Stellenbosch	larva	NA	NA	female	NA	NA	NA	larval/pupal	female	NA		NA	NA	South Africa	Negative	0	0	0	0	0	97	263
SRR10571989	50486296	15145888800	300	30_P4_B4	WGS	unspecified	GENOMIC	PAIRED	ILLUMINA	Illumina NovaSeq 6000	PRJNA592197	SAMN13415907	Backcross_offspring#30	RSA2017_248_23	RSA2017_248	1/29/2018	South Africa: Stellenbosch	larva	NA	NA	female	NA	NA	NA	larval/pupal	female	NA		NA	NA	South Africa	Negative	0	0	0	0	0	97	263
SRR10055130	14963614	3770830728	252	Scu-D-2-9	WGS	RANDOM	GENOMIC	PAIRED	ILLUMINA	Illumina HiSeq 2500	PRJNA516678	SAMN12671530	scu_d_2_9	not applicable	not applicable	missing	South Africa	whole individual	larval/pupal	NA	male	NA	drone	NA	larval/pupal	male	NA		NA	NA	South Africa	Negative	0	0	0	0	0	79	139
SRR10055355	14237548	3587862096	252	P3603_208	WGS	RANDOM	GENOMIC	PAIRED	ILLUMINA	Illumina HiSeq 2500	PRJNA516678	SAMN12671599	KL1_8_bond	not applicable	not applicable	missing	Sweden: Gotland	whole individual	larval/pupal	NA	male	NA	drone	NA	larval/pupal	male	NA		NA	NA	Sweden	Negative	0	0	0	0	0	125	0
SRR10055133	13826260	3484217520	252	Scu-D-2-10	WGS	RANDOM	GENOMIC	PAIRED	ILLUMINA	Illumina HiSeq 2500	PRJNA516678	SAMN12671531	scu_d_2_10	not applicable	not applicable	missing	South Africa	whole individual	larval/pupal	NA	male	NA	drone	NA	larval/pupal	male	NA		NA	NA	South Africa	Negative	0	0	0	0	0	88	214
SRR10055192	13440599	3387030948	252	Cap-SB-2-2	WGS	RANDOM	GENOMIC	PAIRED	ILLUMINA	Illumina HiSeq 2500	PRJNA516678	SAMN12671494	cap_sb_2_2	not applicable	not applicable	missing	South Africa	whole individual	larval/pupal	NA	male	NA	drone	NA	larval/pupal	male	NA		NA	NA	South Africa	Negative	0	0	0	0	0	0	0
SRR10055273	13111853	3304186956	252	Cap-SB-4-8	WGS	RANDOM	GENOMIC	PAIRED	ILLUMINA	Illumina HiSeq 2500	PRJNA516678	SAMN12671511	cap_sb_4_8	not applicable	not applicable	missing	South Africa	whole individual	larval/pupal	NA	male	NA	drone	NA	larval/pupal	male	NA		NA	NA	South Africa	Negative	0	0	0	0	0	83	171
SRR10055317	13043639	3286997028	252	Cap-SB-4-4	WGS	RANDOM	GENOMIC	PAIRED	ILLUMINA	Illumina HiSeq 2500	PRJNA516678	SAMN12671507	cap_sb_4_4	not applicable	not applicable	missing	South Africa	whole individual	larval/pupal	NA	male	NA	drone	NA	larval/pupal	male	NA		NA	NA	South Africa	Negative	0	0	0	0	0	0	0
SRR10055359	12811087	3228393924	252	P3603_203	WGS	RANDOM	GENOMIC	PAIRED	ILLUMINA	Illumina HiSeq 2500	PRJNA516678	SAMN12671594	KL1_3_bond	not applicable	not applicable	missing	Sweden: Gotland	whole individual	larval/pupal	NA	male	NA	drone	NA	larval/pupal	male	NA		NA	NA	Sweden	Negative	0	0	0	0	0	172	0
SRR10055115	12769463	3192365750	250	Scu-LT-5-2	WGS	RANDOM	GENOMIC	PAIRED	ILLUMINA	Illumina HiSeq 2500	PRJNA516678	SAMN12671543	scu_lt_5_2	not applicable	not applicable	missing	South Africa	whole individual	larval/pupal	NA	male	NA	drone	NA	larval/pupal	male	NA		NA	NA	South Africa	Negative	0	0	0	0	0	0	420
SRR10055220	12288299	3072074750	250	Cap-SOM-1-5	WGS	RANDOM	GENOMIC	PAIRED	ILLUMINA	Illumina HiSeq 2500	PRJNA516678	SAMN12671516	cap_som_1_5	not applicable	not applicable	missing	South Africa	whole individual	larval/pupal	NA	male	NA	drone	NA	larval/pupal	male	NA		NA	NA	South Africa	Negative	0	0	0	0	0	0	348
SRR10055195	12217365	3054341250	250	Cap-SOM-1-7	WGS	RANDOM	GENOMIC	PAIRED	ILLUMINA	Illumina HiSeq 2500	PRJNA516678	SAMN12671518	cap_som_1_7	not applicable	not applicable	missing	South Africa	whole individual	larval/pupal	NA	male	NA	drone	NA	larval/pupal	male	NA		NA	NA	South Africa	Negative	0	0	0	0	0	0	253
SRR10055379	12086675	3045842100	252	P3603_136	WGS	RANDOM	GENOMIC	PAIRED	ILLUMINA	Illumina HiSeq 2500	PRJNA516678	SAMN12671577	GF2_6_al	not applicable	not applicable	missing	Finland: Aland	whole individual	larval/pupal	NA	male	NA	drone	NA	larval/pupal	male	NA		NA	NA	Finland	Negative	0	0	0	0	0	107	0
SRR10055124	11938881	3008598012	252	Scu-D-2-4	WGS	RANDOM	GENOMIC	PAIRED	ILLUMINA	Illumina HiSeq 2500	PRJNA516678	SAMN12671535	scu_d_2_4	not applicable	not applicable	missing	South Africa	whole individual	larval/pupal	NA	male	NA	drone	NA	larval/pupal	male	NA		NA	NA	South Africa	Negative	0	0	0	0	0	75	161
SRR10055112	11780899	2945224750	250	Scu-LT-5-6	WGS	RANDOM	GENOMIC	PAIRED	ILLUMINA	Illumina HiSeq 2500	PRJNA516678	SAMN12671547	scu_lt_5_6	not applicable	not applicable	missing	South Africa	whole individual	larval/pupal	NA	male	NA	drone	NA	larval/pupal	male	NA		NA	NA	South Africa	Negative	0	0	0	0	0	0	380
SRR10055119	11714884	2928721000	250	Scu-LT-5-10	WGS	RANDOM	GENOMIC	PAIRED	ILLUMINA	Illumina HiSeq 2500	PRJNA516678	SAMN12671541	scu_lt_5_10	not applicable	not applicable	missing	South Africa	whole individual	larval/pupal	NA	male	NA	drone	NA	larval/pupal	male	NA		NA	NA	South Africa	Negative	0	0	0	0	0	0	548
SRR10055295	11569137	2915422524	252	Cap-SB-4-6	WGS	RANDOM	GENOMIC	PAIRED	ILLUMINA	Illumina HiSeq 2500	PRJNA516678	SAMN12671509	cap_sb_4_6	not applicable	not applicable	missing	South Africa	whole individual	larval/pupal	NA	male	NA	drone	NA	larval/pupal	male	NA		NA	NA	South Africa	Negative	0	0	0	0	0	0	0
SRR10055123	11470527	2890572804	252	Scu-D-2-5	WGS	RANDOM	GENOMIC	PAIRED	ILLUMINA	Illumina HiSeq 2500	PRJNA516678	SAMN12671536	scu_d_2_5	not applicable	not applicable	missing	South Africa	whole individual	larval/pupal	NA	male	NA	drone	NA	larval/pupal	male	NA		NA	NA	South Africa	Negative	0	0	0	0	0	77	149
SRR10055357	11225891	2828924532	252	P3603_205	WGS	RANDOM	GENOMIC	PAIRED	ILLUMINA	Illumina HiSeq 2500	PRJNA516678	SAMN12671596	KL1_5_bond	not applicable	not applicable	missing	Sweden: Gotland	whole individual	larval/pupal	NA	male	NA	drone	NA	larval/pupal	male	NA		NA	NA	Sweden	Negative	0	0	0	0	0	122	0
SRR10055350	11209606	2824820712	252	Cap-SB-4-1	WGS	RANDOM	GENOMIC	PAIRED	ILLUMINA	Illumina HiSeq 2500	PRJNA516678	SAMN12671504	cap_sb_4_1	not applicable	not applicable	missing	South Africa	whole individual	larval/pupal	NA	male	NA	drone	NA	larval/pupal	male	NA		NA	NA	South Africa	Negative	0	0	0	0	0	0	258
SRR10055372	11010255	2774584260	252	P3603_142	WGS	RANDOM	GENOMIC	PAIRED	ILLUMINA	Illumina HiSeq 2500	PRJNA516678	SAMN12671583	K5_2_al	not applicable	not applicable	missing	Finland: Aland	whole individual	larval/pupal	NA	male	NA	drone	NA	larval/pupal	male	NA		NA	NA	Finland	Negative	0	0	0	0	0	181	0
SRR10055120	10946817	2736704250	250	Scu-LT-5-9	WGS	RANDOM	GENOMIC	PAIRED	ILLUMINA	Illumina HiSeq 2500	PRJNA516678	SAMN12671540	scu_lt_5_9	not applicable	not applicable	missing	South Africa	whole individual	larval/pupal	NA	male	NA	drone	NA	larval/pupal	male	NA		NA	NA	South Africa	Negative	0	0	0	0	0	0	626
SRR10055170	10882016	2720504000	250	Cap-SOM-1-9	WGS	RANDOM	GENOMIC	PAIRED	ILLUMINA	Illumina HiSeq 2500	PRJNA516678	SAMN12671520	cap_som_1_9	not applicable	not applicable	missing	South Africa	whole individual	larval/pupal	NA	male	NA	drone	NA	larval/pupal	male	NA		NA	NA	South Africa	Negative	0	0	0	0	0	0	0
SRR10055117	10808574	2702143500	250	Scu-LT-5-4	WGS	RANDOM	GENOMIC	PAIRED	ILLUMINA	Illumina HiSeq 2500	PRJNA516678	SAMN12671545	scu_lt_5_4	not applicable	not applicable	missing	South Africa	whole individual	larval/pupal	NA	male	NA	drone	NA	larval/pupal	male	NA		NA	NA	South Africa	Negative	0	0	0	0	0	0	646
SRR10055138	10792041	2719594332	252	Cap-SB-2-4	WGS	RANDOM	GENOMIC	PAIRED	ILLUMINA	Illumina HiSeq 2500	PRJNA516678	SAMN12671496	cap_sb_2_4	not applicable	not applicable	missing	South Africa	whole individual	larval/pupal	NA	male	NA	drone	NA	larval/pupal	male	NA		NA	NA	South Africa	Negative	0	0	0	0	0	8	434
SRR10055347	10703332	2697239664	252	P3603_215	WGS	RANDOM	GENOMIC	PAIRED	ILLUMINA	Illumina HiSeq 2500	PRJNA516678	SAMN12671606	KL2_5_bond	not applicable	not applicable	missing	Sweden: Gotland	whole individual	larval/pupal	NA	male	NA	drone	NA	larval/pupal	male	NA		NA	NA	Sweden	Negative	0	0	0	0	0	313	0
SRR10055136	10466416	2637536832	252	Scu-D-1-5	WGS	RANDOM	GENOMIC	PAIRED	ILLUMINA	Illumina HiSeq 2500	PRJNA516678	SAMN12671525	scu_d_1_5	not applicable	not applicable	missing	South Africa	whole individual	larval/pupal	NA	male	NA	drone	NA	larval/pupal	male	NA		NA	NA	South Africa	Negative	0	0	0	0	0	0	372
SRR10055263	10399967	2620791684	252	P3603_103	WGS	RANDOM	GENOMIC	PAIRED	ILLUMINA	Illumina HiSeq 2500	PRJNA516678	SAMN12671682	T3_3_al	not applicable	not applicable	missing	Finland: Aland	whole individual	larval/pupal	NA	male	NA	drone	NA	larval/pupal	male	NA		NA	NA	Finland	Negative	0	0	0	0	0	146	0
SRR10055244	10275343	2589386436	252	P3603_129	WGS	RANDOM	GENOMIC	PAIRED	ILLUMINA	Illumina HiSeq 2500	PRJNA516678	SAMN12671698	TC2_9_al	not applicable	not applicable	missing	Finland: Aland	whole individual	larval/pupal	NA	male	NA	drone	NA	larval/pupal	male	NA		NA	NA	Finland	Negative	0	0	0	0	0	0	0
SRR10055349	10240496	2580604992	252	P3603_212	WGS	RANDOM	GENOMIC	PAIRED	ILLUMINA	Illumina HiSeq 2500	PRJNA516678	SAMN12671603	KL2_2_bond	not applicable	not applicable	missing	Sweden: Gotland	whole individual	larval/pupal	NA	male	NA	drone	NA	larval/pupal	male	NA		NA	NA	Sweden	Negative	0	0	0	0	0	228	0
SRR10055306	10197170	2569686840	252	P3603_221	WGS	RANDOM	GENOMIC	PAIRED	ILLUMINA	Illumina HiSeq 2500	PRJNA516678	SAMN12671642	NW1_1_bond	not applicable	not applicable	missing	Sweden: Gotland	whole individual	larval/pupal	NA	male	NA	drone	NA	larval/pupal	male	NA		NA	NA	Sweden	Negative	0	0	0	0	0	223	0
SRR10055322	10184264	2566434528	252	Cap-SB-2-8	WGS	RANDOM	GENOMIC	PAIRED	ILLUMINA	Illumina HiSeq 2500	PRJNA516678	SAMN12671500	cap_sb_2_8	not applicable	not applicable	missing	South Africa	whole individual	larval/pupal	NA	male	NA	drone	NA	larval/pupal	male	NA		NA	NA	South Africa	Negative	0	0	0	0	0	2	373
SRR10055378	10184043	2566378836	252	P3603_137	WGS	RANDOM	GENOMIC	PAIRED	ILLUMINA	Illumina HiSeq 2500	PRJNA516678	SAMN12671578	GF2_7_al	not applicable	not applicable	missing	Finland: Aland	whole individual	larval/pupal	NA	male	NA	drone	NA	larval/pupal	male	NA		NA	NA	Finland	Negative	0	0	0	0	0	299	0
SRR10055262	10167962	2541990500	250	Cap-SOM-1-10	WGS	RANDOM	GENOMIC	PAIRED	ILLUMINA	Illumina HiSeq 2500	PRJNA516678	SAMN12671512	cap_som_1_10	not applicable	not applicable	missing	South Africa	whole individual	larval/pupal	NA	male	NA	drone	NA	larval/pupal	male	NA		NA	NA	South Africa	Negative	0	0	0	0	0	0	0
SRR10055131	10100865	2545417980	252	Scu-D-1-9	WGS	RANDOM	GENOMIC	PAIRED	ILLUMINA	Illumina HiSeq 2500	PRJNA516678	SAMN12671529	scu_d_1_9	not applicable	not applicable	missing	South Africa	whole individual	larval/pupal	NA	male	NA	drone	NA	larval/pupal	male	NA		NA	NA	South Africa	Negative	0	0	0	0	0	405	75
SRR10055135	10011398	2522872296	252	Scu-D-1-6	WGS	RANDOM	GENOMIC	PAIRED	ILLUMINA	Illumina HiSeq 2500	PRJNA516678	SAMN12671526	scu_d_1_6	not applicable	not applicable	missing	South Africa	whole individual	larval/pupal	NA	male	NA	drone	NA	larval/pupal	male	NA		NA	NA	South Africa	Negative	0	0	0	0	0	17	373
SRR10055282	9997804	2519446608	252	P3603_244	WGS	RANDOM	GENOMIC	PAIRED	ILLUMINA	Illumina HiSeq 2500	PRJNA516678	SAMN12671664	NW4_5_bond	not applicable	not applicable	missing	Sweden: Gotland	whole individual	larval/pupal	NA	male	NA	drone	NA	larval/pupal	male	NA		NA	NA	Sweden	Negative	0	0	0	0	0	299	0
SRR10055340	9949626	2507305752	252	Cap-SB-4-2	WGS	RANDOM	GENOMIC	PAIRED	ILLUMINA	Illumina HiSeq 2500	PRJNA516678	SAMN12671505	cap_sb_4_2	not applicable	not applicable	missing	South Africa	whole individual	larval/pupal	NA	male	NA	drone	NA	larval/pupal	male	NA		NA	NA	South Africa	Negative	0	0	0	0	0	91	149
SRR10055256	9789421	2466934092	252	P3603_108	WGS	RANDOM	GENOMIC	PAIRED	ILLUMINA	Illumina HiSeq 2500	PRJNA516678	SAMN12671687	T3_8_al	not applicable	not applicable	missing	Finland: Aland	whole individual	larval/pupal	NA	male	NA	drone	NA	larval/pupal	male	NA		NA	NA	Finland	Negative	0	0	0	0	0	0	0
SRR10055239	9654308	2413577000	250	Cap-SOM-1-3	WGS	RANDOM	GENOMIC	PAIRED	ILLUMINA	Illumina HiSeq 2500	PRJNA516678	SAMN12671514	cap_som_1_3	not applicable	not applicable	missing	South Africa	whole individual	larval/pupal	NA	male	NA	drone	NA	larval/pupal	male	NA		NA	NA	South Africa	Negative	0	0	0	0	0	0	208
SRR10055132	9634590	2427916680	252	Scu-D-1-8	WGS	RANDOM	GENOMIC	PAIRED	ILLUMINA	Illumina HiSeq 2500	PRJNA516678	SAMN12671528	scu_d_1_8	not applicable	not applicable	missing	South Africa	whole individual	larval/pupal	NA	male	NA	drone	NA	larval/pupal	male	NA		NA	NA	South Africa	Negative	0	0	0	0	0	394	78
SRR10055328	9606609	2420865468	252	P3603_162	WGS	RANDOM	GENOMIC	PAIRED	ILLUMINA	Illumina HiSeq 2500	PRJNA516678	SAMN12671623	N4_2_al	not applicable	not applicable	missing	Finland: Aland	whole individual	larval/pupal	NA	male	NA	drone	NA	larval/pupal	male	NA		NA	NA	Finland	Negative	0	0	0	0	0	183	0
SRR10055384	9578902	2413883304	252	P3603_131	WGS	RANDOM	GENOMIC	PAIRED	ILLUMINA	Illumina HiSeq 2500	PRJNA516678	SAMN12671572	GF2_1_al	not applicable	not applicable	missing	Finland: Aland	whole individual	larval/pupal	NA	male	NA	drone	NA	larval/pupal	male	NA		NA	NA	Finland	Negative	0	0	0	0	0	0	0
SRR10055103	9554592	2407757184	252	P3603_263	WGS	RANDOM	GENOMIC	PAIRED	ILLUMINA	Illumina HiSeq 2500	PRJNA516678	SAMN12671555	FB_B12_4_bond	not applicable	not applicable	missing	Sweden: Gotland	whole individual	larval/pupal	NA	male	NA	drone	NA	larval/pupal	male	NA		NA	NA	Sweden	Negative	0	0	0	0	0	243	0
SRR10055367	9511592	2396921184	252	P3603_146	WGS	RANDOM	GENOMIC	PAIRED	ILLUMINA	Illumina HiSeq 2500	PRJNA516678	SAMN12671587	K5_6_al	not applicable	not applicable	missing	Finland: Aland	whole individual	larval/pupal	NA	male	NA	drone	NA	larval/pupal	male	NA		NA	NA	Finland	Negative	0	0	0	0	0	189	0
SRR10055327	9485662	2390386824	252	P3603_163	WGS	RANDOM	GENOMIC	PAIRED	ILLUMINA	Illumina HiSeq 2500	PRJNA516678	SAMN12671624	N4_3_al	not applicable	not applicable	missing	Finland: Aland	whole individual	larval/pupal	NA	male	NA	drone	NA	larval/pupal	male	NA		NA	NA	Finland	Negative	0	0	0	0	0	179	0
SRR10055260	9369510	2361116520	252	P3603_105	WGS	RANDOM	GENOMIC	PAIRED	ILLUMINA	Illumina HiSeq 2500	PRJNA516678	SAMN12671684	T3_5_al	not applicable	not applicable	missing	Finland: Aland	whole individual	larval/pupal	NA	male	NA	drone	NA	larval/pupal	male	NA		NA	NA	Finland	Negative	0	0	0	0	0	144	0
SRR10055388	9339004	2353429008	252	P3603_277	WGS	RANDOM	GENOMIC	PAIRED	ILLUMINA	Illumina HiSeq 2500	PRJNA516678	SAMN12671569	FB_B14_8_bond	not applicable	not applicable	missing	Sweden: Gotland	whole individual	larval/pupal	NA	male	NA	drone	NA	larval/pupal	male	NA		NA	NA	Sweden	Negative	0	0	0	0	0	211	0
SRR10055333	9296420	2342697840	252	P3603_158	WGS	RANDOM	GENOMIC	PAIRED	ILLUMINA	Illumina HiSeq 2500	PRJNA516678	SAMN12671619	N1_8_al	not applicable	not applicable	missing	Finland: Aland	whole individual	larval/pupal	NA	male	NA	drone	NA	larval/pupal	male	NA		NA	NA	Finland	Negative	0	0	0	0	0	114	0
SRR10055114	9292736	2323184000	250	Scu-LT-5-3	WGS	RANDOM	GENOMIC	PAIRED	ILLUMINA	Illumina HiSeq 2500	PRJNA516678	SAMN12671544	scu_lt_5_3	not applicable	not applicable	missing	South Africa	whole individual	larval/pupal	NA	male	NA	drone	NA	larval/pupal	male	NA		NA	NA	South Africa	Negative	0	0	0	0	0	0	604
SRR10055099	9205701	2319836652	252	P3603_266	WGS	RANDOM	GENOMIC	PAIRED	ILLUMINA	Illumina HiSeq 2500	PRJNA516678	SAMN12671558	FB_B12_7_bond	not applicable	not applicable	missing	Sweden: Gotland	whole individual	larval/pupal	NA	male	NA	drone	NA	larval/pupal	male	NA		NA	NA	Sweden	Negative	0	0	0	0	0	0	0
SRR10055360	9193354	2316725208	252	P3603_206	WGS	RANDOM	GENOMIC	PAIRED	ILLUMINA	Illumina HiSeq 2500	PRJNA516678	SAMN12671597	KL1_6_bond	not applicable	not applicable	missing	Sweden: Gotland	whole individual	larval/pupal	NA	male	NA	drone	NA	larval/pupal	male	NA		NA	NA	Sweden	Negative	0	0	0	0	0	184	0
SRR10055356	9184369	2314460988	252	P3603_207	WGS	RANDOM	GENOMIC	PAIRED	ILLUMINA	Illumina HiSeq 2500	PRJNA516678	SAMN12671598	KL1_7_bond	not applicable	not applicable	missing	Sweden: Gotland	whole individual	larval/pupal	NA	male	NA	drone	NA	larval/pupal	male	NA		NA	NA	Sweden	Negative	0	0	0	0	0	150	0
SRR10055365	9104623	2294364996	252	P3603_209	WGS	RANDOM	GENOMIC	PAIRED	ILLUMINA	Illumina HiSeq 2500	PRJNA516678	SAMN12671590	KL1_9_bond	not applicable	not applicable	missing	Sweden: Gotland	whole individual	larval/pupal	NA	male	NA	drone	NA	larval/pupal	male	NA		NA	NA	Sweden	Negative	0	0	0	0	0	0	0
SRR10055248	9082686	2288836872	252	P3603_114	WGS	RANDOM	GENOMIC	PAIRED	ILLUMINA	Illumina HiSeq 2500	PRJNA516678	SAMN12671693	TB1_4_al	not applicable	not applicable	missing	Finland: Aland	whole individual	larval/pupal	NA	male	NA	drone	NA	larval/pupal	male	NA		NA	NA	Finland	Negative	0	0	0	0	0	139	0
SRR10055361	9076733	2287336716	252	P3603_202	WGS	RANDOM	GENOMIC	PAIRED	ILLUMINA	Illumina HiSeq 2500	PRJNA516678	SAMN12671593	KL1_2_bond	not applicable	not applicable	missing	Sweden: Gotland	whole individual	larval/pupal	NA	male	NA	drone	NA	larval/pupal	male	NA		NA	NA	Sweden	Negative	0	0	0	0	0	136	0
SRR10055364	9037200	2277374400	252	P3603_210	WGS	RANDOM	GENOMIC	PAIRED	ILLUMINA	Illumina HiSeq 2500	PRJNA516678	SAMN12671591	KL1_10_bond	not applicable	not applicable	missing	Sweden: Gotland	whole individual	larval/pupal	NA	male	NA	drone	NA	larval/pupal	male	NA		NA	NA	Sweden	Negative	0	0	0	0	0	153	0
SRR10055259	9015972	2272024944	252	P3603_106	WGS	RANDOM	GENOMIC	PAIRED	ILLUMINA	Illumina HiSeq 2500	PRJNA516678	SAMN12671685	T3_6_al	not applicable	not applicable	missing	Finland: Aland	whole individual	larval/pupal	NA	male	NA	drone	NA	larval/pupal	male	NA		NA	NA	Finland	Negative	0	0	0	0	0	124	0
SRR10055385	8992956	2266224912	252	P3603_133	WGS	RANDOM	GENOMIC	PAIRED	ILLUMINA	Illumina HiSeq 2500	PRJNA516678	SAMN12671574	GF2_3_al	not applicable	not applicable	missing	Finland: Aland	whole individual	larval/pupal	NA	male	NA	drone	NA	larval/pupal	male	NA		NA	NA	Finland	Negative	0	0	0	0	0	0	0
SRR10055253	8955716	2256840432	252	P3603_112	WGS	RANDOM	GENOMIC	PAIRED	ILLUMINA	Illumina HiSeq 2500	PRJNA516678	SAMN12671691	TB1_2_al	not applicable	not applicable	missing	Finland: Aland	whole individual	larval/pupal	NA	male	NA	drone	NA	larval/pupal	male	NA		NA	NA	Finland	Negative	0	0	0	0	0	172	0
SRR10055113	8942712	2235678000	250	Scu-LT-5-5	WGS	RANDOM	GENOMIC	PAIRED	ILLUMINA	Illumina HiSeq 2500	PRJNA516678	SAMN12671546	scu_lt_5_5	not applicable	not applicable	missing	South Africa	whole individual	larval/pupal	NA	male	NA	drone	NA	larval/pupal	male	NA		NA	NA	South Africa	Negative	0	0	0	0	0	0	614
SRR10055296	8927770	2249798040	252	P3603_232	WGS	RANDOM	GENOMIC	PAIRED	ILLUMINA	Illumina HiSeq 2500	PRJNA516678	SAMN12671651	NW3_2_bond	not applicable	not applicable	missing	Sweden: Gotland	whole individual	larval/pupal	NA	male	NA	drone	NA	larval/pupal	male	NA		NA	NA	Sweden	Negative	0	0	0	0	0	215	0
SRR10055097	8852438	2230814376	252	P3603_279	WGS	RANDOM	GENOMIC	PAIRED	ILLUMINA	Illumina HiSeq 2500	PRJNA516678	SAMN12671561	FB_B14_10_bond	not applicable	not applicable	missing	Sweden: Gotland	whole individual	larval/pupal	NA	male	NA	drone	NA	larval/pupal	male	NA		NA	NA	Sweden	Negative	0	0	0	0	0	126	0
SRR10055366	8792303	2215660356	252	P3603_147	WGS	RANDOM	GENOMIC	PAIRED	ILLUMINA	Illumina HiSeq 2500	PRJNA516678	SAMN12671588	K5_7_al	not applicable	not applicable	missing	Finland: Aland	whole individual	larval/pupal	NA	male	NA	drone	NA	larval/pupal	male	NA		NA	NA	Finland	Negative	0	0	0	0	0	0	0
SRR10055292	8750046	2205011592	252	P3603_236	WGS	RANDOM	GENOMIC	PAIRED	ILLUMINA	Illumina HiSeq 2500	PRJNA516678	SAMN12671655	NW3_6_bond	not applicable	not applicable	missing	Sweden: Gotland	whole individual	larval/pupal	NA	male	NA	drone	NA	larval/pupal	male	NA		NA	NA	Sweden	Negative	0	0	0	0	0	196	0
SRR10055269	8696731	2191576212	252	P3603_255	WGS	RANDOM	GENOMIC	PAIRED	ILLUMINA	Illumina HiSeq 2500	PRJNA516678	SAMN12671675	NW5_6_bond	not applicable	not applicable	missing	Sweden: Gotland	whole individual	larval/pupal	NA	male	NA	drone	NA	larval/pupal	male	NA		NA	NA	Sweden	Negative	0	0	0	0	0	234	0
SRR10055098	8687366	2189216232	252	P3603_267	WGS	RANDOM	GENOMIC	PAIRED	ILLUMINA	Illumina HiSeq 2500	PRJNA516678	SAMN12671559	FB_B12_8_bond	not applicable	not applicable	missing	Sweden: Gotland	whole individual	larval/pupal	NA	male	NA	drone	NA	larval/pupal	male	NA		NA	NA	Sweden	Negative	0	0	0	0	0	202	0
SRR10055352	8663688	2183249376	252	P3603_213	WGS	RANDOM	GENOMIC	PAIRED	ILLUMINA	Illumina HiSeq 2500	PRJNA516678	SAMN12671604	KL2_3_bond	not applicable	not applicable	missing	Sweden: Gotland	whole individual	larval/pupal	NA	male	NA	drone	NA	larval/pupal	male	NA		NA	NA	Sweden	Negative	0	0	0	0	0	0	0
SRR10055279	8651083	2180072916	252	P3603_247	WGS	RANDOM	GENOMIC	PAIRED	ILLUMINA	Illumina HiSeq 2500	PRJNA516678	SAMN12671667	NW4_8_bond	not applicable	not applicable	missing	Sweden: Gotland	whole individual	larval/pupal	NA	male	NA	drone	NA	larval/pupal	male	NA		NA	NA	Sweden	Negative	0	0	0	0	0	373	0
SRR10055291	8629826	2174716152	252	P3603_238	WGS	RANDOM	GENOMIC	PAIRED	ILLUMINA	Illumina HiSeq 2500	PRJNA516678	SAMN12671656	NW3_8_bond	not applicable	not applicable	missing	Sweden: Gotland	whole individual	larval/pupal	NA	male	NA	drone	NA	larval/pupal	male	NA		NA	NA	Sweden	Negative	0	0	0	0	0	243	0
SRR10055278	8581239	2162472228	252	P3603_251	WGS	RANDOM	GENOMIC	PAIRED	ILLUMINA	Illumina HiSeq 2500	PRJNA516678	SAMN12671671	NW5_2_bond	not applicable	not applicable	missing	Sweden: Gotland	whole individual	larval/pupal	NA	male	NA	drone	NA	larval/pupal	male	NA		NA	NA	Sweden	Negative	0	0	0	0	0	166	0
SRR10055391	8507044	2143775088	252	P3603_273	WGS	RANDOM	GENOMIC	PAIRED	ILLUMINA	Illumina HiSeq 2500	PRJNA516678	SAMN12671565	FB_B14_4_bond	not applicable	not applicable	missing	Sweden: Gotland	whole individual	larval/pupal	NA	male	NA	drone	NA	larval/pupal	male	NA		NA	NA	Sweden	Negative	0	0	0	0	0	258	0
SRR10055290	8488483	2139097716	252	P3603_239	WGS	RANDOM	GENOMIC	PAIRED	ILLUMINA	Illumina HiSeq 2500	PRJNA516678	SAMN12671657	NW3_9_bond	not applicable	not applicable	missing	Sweden: Gotland	whole individual	larval/pupal	NA	male	NA	drone	NA	larval/pupal	male	NA		NA	NA	Sweden	Negative	0	0	0	0	0	0	0
SRR10055348	8464164	2132969328	252	P3603_214	WGS	RANDOM	GENOMIC	PAIRED	ILLUMINA	Illumina HiSeq 2500	PRJNA516678	SAMN12671605	KL2_4_bond	not applicable	not applicable	missing	Sweden: Gotland	whole individual	larval/pupal	NA	male	NA	drone	NA	larval/pupal	male	NA		NA	NA	Sweden	Negative	0	0	0	0	0	201	0
SRR10055289	8450639	2129561028	252	P3603_248	WGS	RANDOM	GENOMIC	PAIRED	ILLUMINA	Illumina HiSeq 2500	PRJNA516678	SAMN12671658	NW4_9_bond	not applicable	not applicable	missing	Sweden: Gotland	whole individual	larval/pupal	NA	male	NA	drone	NA	larval/pupal	male	NA		NA	NA	Sweden	Negative	0	0	0	0	0	243	0
SRR10055331	8441997	2127383244	252	P3603_170	WGS	RANDOM	GENOMIC	PAIRED	ILLUMINA	Illumina HiSeq 2500	PRJNA516678	SAMN12671621	N4_10_al	not applicable	not applicable	missing	Finland: Aland	whole individual	larval/pupal	NA	male	NA	drone	NA	larval/pupal	male	NA		NA	NA	Finland	Negative	0	0	0	0	0	165	0
SRR10055353	8400391	2116898532	252	P3603_220	WGS	RANDOM	GENOMIC	PAIRED	ILLUMINA	Illumina HiSeq 2500	PRJNA516678	SAMN12671601	KL2_10_bond	not applicable	not applicable	missing	Sweden: Gotland	whole individual	larval/pupal	NA	male	NA	drone	NA	larval/pupal	male	NA		NA	NA	Sweden	Negative	0	0	0	0	0	0	0
SRR10055105	8386609	2113425468	252	P3603_261	WGS	RANDOM	GENOMIC	PAIRED	ILLUMINA	Illumina HiSeq 2500	PRJNA516678	SAMN12671553	FB_B12_2_bond	not applicable	not applicable	missing	Sweden: Gotland	whole individual	larval/pupal	NA	male	NA	drone	NA	larval/pupal	male	NA		NA	NA	Sweden	Negative	0	0	0	0	0	186	0
SRR10055358	8381633	2112171516	252	P3603_204	WGS	RANDOM	GENOMIC	PAIRED	ILLUMINA	Illumina HiSeq 2500	PRJNA516678	SAMN12671595	KL1_4_bond	not applicable	not applicable	missing	Sweden: Gotland	whole individual	larval/pupal	NA	male	NA	drone	NA	larval/pupal	male	NA		NA	NA	Sweden	Negative	0	0	0	0	0	108	0
SRR10055387	8290361	2089170972	252	P3603_139	WGS	RANDOM	GENOMIC	PAIRED	ILLUMINA	Illumina HiSeq 2500	PRJNA516678	SAMN12671570	GF2_9_al	not applicable	not applicable	missing	Finland: Aland	whole individual	larval/pupal	NA	male	NA	drone	NA	larval/pupal	male	NA		NA	NA	Finland	Negative	0	0	0	0	0	143	0
SRR10055380	8218801	2071137852	252	P3603_135	WGS	RANDOM	GENOMIC	PAIRED	ILLUMINA	Illumina HiSeq 2500	PRJNA516678	SAMN12671576	GF2_5_al	not applicable	not applicable	missing	Finland: Aland	whole individual	larval/pupal	NA	male	NA	drone	NA	larval/pupal	male	NA		NA	NA	Finland	Negative	0	0	0	0	0	0	0
SRR10055271	8198889	2066120028	252	P3603_254	WGS	RANDOM	GENOMIC	PAIRED	ILLUMINA	Illumina HiSeq 2500	PRJNA516678	SAMN12671674	NW5_5_bond	not applicable	not applicable	missing	Sweden: Gotland	whole individual	larval/pupal	NA	male	NA	drone	NA	larval/pupal	male	NA		NA	NA	Sweden	Negative	0	0	0	0	0	316	0
SRR10055284	8187267	2063191284	252	P3603_242	WGS	RANDOM	GENOMIC	PAIRED	ILLUMINA	Illumina HiSeq 2500	PRJNA516678	SAMN12671662	NW4_3_bond	not applicable	not applicable	missing	Sweden: Gotland	whole individual	larval/pupal	NA	male	NA	drone	NA	larval/pupal	male	NA		NA	NA	Sweden	Negative	0	0	0	0	0	314	0
SRR10055106	8160083	2056340916	252	P3603_260	WGS	RANDOM	GENOMIC	PAIRED	ILLUMINA	Illumina HiSeq 2500	PRJNA516678	SAMN12671552	FB_B12_1_bond	not applicable	not applicable	missing	Sweden: Gotland	whole individual	larval/pupal	NA	male	NA	drone	NA	larval/pupal	male	NA		NA	NA	Sweden	Negative	0	0	0	0	0	246	0
SRR10055275	8149827	2053756404	252	P3603_250	WGS	RANDOM	GENOMIC	PAIRED	ILLUMINA	Illumina HiSeq 2500	PRJNA516678	SAMN12671670	NW5_1_bond	not applicable	not applicable	missing	Sweden: Gotland	whole individual	larval/pupal	NA	male	NA	drone	NA	larval/pupal	male	NA		NA	NA	Sweden	Negative	0	0	0	0	0	237	0
SRR10055287	8070738	2033825976	252	P3603_240	WGS	RANDOM	GENOMIC	PAIRED	ILLUMINA	Illumina HiSeq 2500	PRJNA516678	SAMN12671660	NW4_1_bond	not applicable	not applicable	missing	Sweden: Gotland	whole individual	larval/pupal	NA	male	NA	drone	NA	larval/pupal	male	NA		NA	NA	Sweden	Negative	0	0	0	0	0	332	0
SRR10055368	8068162	2033176824	252	P3603_145	WGS	RANDOM	GENOMIC	PAIRED	ILLUMINA	Illumina HiSeq 2500	PRJNA516678	SAMN12671586	K5_5_al	not applicable	not applicable	missing	Finland: Aland	whole individual	larval/pupal	NA	male	NA	drone	NA	larval/pupal	male	NA		NA	NA	Finland	Negative	0	0	0	0	0	193	0
SRR10055330	8054545	2029745340	252	P3603_161	WGS	RANDOM	GENOMIC	PAIRED	ILLUMINA	Illumina HiSeq 2500	PRJNA516678	SAMN12671622	N4_1_al	not applicable	not applicable	missing	Finland: Aland	whole individual	larval/pupal	NA	male	NA	drone	NA	larval/pupal	male	NA		NA	NA	Finland	Negative	0	0	0	0	0	128	0
SRR10055308	8052934	2029339368	252	P3603_230	WGS	RANDOM	GENOMIC	PAIRED	ILLUMINA	Illumina HiSeq 2500	PRJNA516678	SAMN12671641	NW1_10_bond	not applicable	not applicable	missing	Sweden: Gotland	whole individual	larval/pupal	NA	male	NA	drone	NA	larval/pupal	male	NA		NA	NA	Sweden	Negative	0	0	0	0	0	240	0
SRR10055104	8044322	2027169144	252	P3603_262	WGS	RANDOM	GENOMIC	PAIRED	ILLUMINA	Illumina HiSeq 2500	PRJNA516678	SAMN12671554	FB_B12_3_bond	not applicable	not applicable	missing	Sweden: Gotland	whole individual	larval/pupal	NA	male	NA	drone	NA	larval/pupal	male	NA		NA	NA	Sweden	Negative	0	0	0	0	0	0	0
SRR10055303	8026158	2022591816	252	P3603_224	WGS	RANDOM	GENOMIC	PAIRED	ILLUMINA	Illumina HiSeq 2500	PRJNA516678	SAMN12671645	NW1_4_bond	not applicable	not applicable	missing	Sweden: Gotland	whole individual	larval/pupal	NA	male	NA	drone	NA	larval/pupal	male	NA		NA	NA	Sweden	Negative	0	0	0	0	0	256	0
SRR10055312	8012848	2019237696	252	P3603_175	WGS	RANDOM	GENOMIC	PAIRED	ILLUMINA	Illumina HiSeq 2500	PRJNA516678	SAMN12671636	NB1_5_al	not applicable	not applicable	missing	Finland: Aland	whole individual	larval/pupal	NA	male	NA	drone	NA	larval/pupal	male	NA		NA	NA	Finland	Negative	0	0	0	0	0	287	0
SRR10055100	8010818	2018726136	252	P3603_265	WGS	RANDOM	GENOMIC	PAIRED	ILLUMINA	Illumina HiSeq 2500	PRJNA516678	SAMN12671557	FB_B12_6_bond	not applicable	not applicable	missing	Sweden: Gotland	whole individual	larval/pupal	NA	male	NA	drone	NA	larval/pupal	male	NA		NA	NA	Sweden	Negative	0	0	0	0	0	78	0
SRR10055101	7980423	2011066596	252	P3603_278	WGS	RANDOM	GENOMIC	PAIRED	ILLUMINA	Illumina HiSeq 2500	PRJNA516678	SAMN12671560	FB_B14_9_bond	not applicable	not applicable	missing	Sweden: Gotland	whole individual	larval/pupal	NA	male	NA	drone	NA	larval/pupal	male	NA		NA	NA	Sweden	Negative	0	0	0	0	0	273	0
SRR10055354	7971201	2008742652	252	P3603_219	WGS	RANDOM	GENOMIC	PAIRED	ILLUMINA	Illumina HiSeq 2500	PRJNA516678	SAMN12671600	KL2_9_bond	not applicable	not applicable	missing	Sweden: Gotland	whole individual	larval/pupal	NA	male	NA	drone	NA	larval/pupal	male	NA		NA	NA	Sweden	Negative	0	0	0	0	0	0	0
SRR10055261	7954085	2004429420	252	P3603_104	WGS	RANDOM	GENOMIC	PAIRED	ILLUMINA	Illumina HiSeq 2500	PRJNA516678	SAMN12671683	T3_4_al	not applicable	not applicable	missing	Finland: Aland	whole individual	larval/pupal	NA	male	NA	drone	NA	larval/pupal	male	NA		NA	NA	Finland	Negative	0	0	0	0	0	135	0
SRR10055332	7908834	1993026168	252	P3603_169	WGS	RANDOM	GENOMIC	PAIRED	ILLUMINA	Illumina HiSeq 2500	PRJNA516678	SAMN12671620	N4_9_al	not applicable	not applicable	missing	Finland: Aland	whole individual	larval/pupal	NA	male	NA	drone	NA	larval/pupal	male	NA		NA	NA	Finland	Negative	0	0	0	0	0	241	0
SRR10055371	7883819	1986722388	252	P3603_143	WGS	RANDOM	GENOMIC	PAIRED	ILLUMINA	Illumina HiSeq 2500	PRJNA516678	SAMN12671584	K5_3_al	not applicable	not applicable	missing	Finland: Aland	whole individual	larval/pupal	NA	male	NA	drone	NA	larval/pupal	male	NA		NA	NA	Finland	Negative	0	0	0	0	0	155	0
SRR10055272	7755082	1954280664	252	P3603_253	WGS	RANDOM	GENOMIC	PAIRED	ILLUMINA	Illumina HiSeq 2500	PRJNA516678	SAMN12671673	NW5_4_bond	not applicable	not applicable	missing	Sweden: Gotland	whole individual	larval/pupal	NA	male	NA	drone	NA	larval/pupal	male	NA		NA	NA	Sweden	Negative	0	0	0	0	0	151	0
SRR10055323	7752841	1953715932	252	P3603_167	WGS	RANDOM	GENOMIC	PAIRED	ILLUMINA	Illumina HiSeq 2500	PRJNA516678	SAMN12671628	N4_7_al	not applicable	not applicable	missing	Finland: Aland	whole individual	larval/pupal	NA	male	NA	drone	NA	larval/pupal	male	NA		NA	NA	Finland	Negative	0	0	0	0	0	158	0
SRR10055258	7741127	1950764004	252	P3603_107	WGS	RANDOM	GENOMIC	PAIRED	ILLUMINA	Illumina HiSeq 2500	PRJNA516678	SAMN12671686	T3_7_al	not applicable	not applicable	missing	Finland: Aland	whole individual	larval/pupal	NA	male	NA	drone	NA	larval/pupal	male	NA		NA	NA	Finland	Negative	0	0	0	0	0	0	0
SRR10055108	7729961	1947950172	252	P3603_268	WGS	RANDOM	GENOMIC	PAIRED	ILLUMINA	Illumina HiSeq 2500	PRJNA516678	SAMN12671550	FB_B12_9_bond	not applicable	not applicable	missing	Sweden: Gotland	whole individual	larval/pupal	NA	male	NA	drone	NA	larval/pupal	male	NA		NA	NA	Sweden	Negative	0	0	0	0	0	211	0
SRR10055286	7729029	1947715308	252	P3603_243	WGS	RANDOM	GENOMIC	PAIRED	ILLUMINA	Illumina HiSeq 2500	PRJNA516678	SAMN12671663	NW4_4_bond	not applicable	not applicable	missing	Sweden: Gotland	whole individual	larval/pupal	NA	male	NA	drone	NA	larval/pupal	male	NA		NA	NA	Sweden	Negative	0	0	0	0	0	231	0
SRR10055343	7662600	1930975200	252	P3603_218	WGS	RANDOM	GENOMIC	PAIRED	ILLUMINA	Illumina HiSeq 2500	PRJNA516678	SAMN12671609	KL2_8_bond	not applicable	not applicable	missing	Sweden: Gotland	whole individual	larval/pupal	NA	male	NA	drone	NA	larval/pupal	male	NA		NA	NA	Sweden	Negative	0	0	0	0	0	367	0
SRR10055370	7661667	1930740084	252	P3603_144	WGS	RANDOM	GENOMIC	PAIRED	ILLUMINA	Illumina HiSeq 2500	PRJNA516678	SAMN12671585	K5_4_al	not applicable	not applicable	missing	Finland: Aland	whole individual	larval/pupal	NA	male	NA	drone	NA	larval/pupal	male	NA		NA	NA	Finland	Negative	0	0	0	0	0	243	0
SRR10055257	7606520	1916843040	252	P3603_111	WGS	RANDOM	GENOMIC	PAIRED	ILLUMINA	Illumina HiSeq 2500	PRJNA516678	SAMN12671690	TB1_1_al	not applicable	not applicable	missing	Finland: Aland	whole individual	larval/pupal	NA	male	NA	drone	NA	larval/pupal	male	NA		NA	NA	Finland	Negative	0	0	0	0	0	0	0
SRR10055301	7493142	1888271784	252	P3603_226	WGS	RANDOM	GENOMIC	PAIRED	ILLUMINA	Illumina HiSeq 2500	PRJNA516678	SAMN12671647	NW1_6_bond	not applicable	not applicable	missing	Sweden: Gotland	whole individual	larval/pupal	NA	male	NA	drone	NA	larval/pupal	male	NA		NA	NA	Sweden	Negative	0	0	0	0	0	198	0
SRR10055242	7471960	1882933920	252	P3603_121	WGS	RANDOM	GENOMIC	PAIRED	ILLUMINA	Illumina HiSeq 2500	PRJNA516678	SAMN12671700	TC2_1_al	not applicable	not applicable	missing	Finland: Aland	whole individual	larval/pupal	NA	male	NA	drone	NA	larval/pupal	male	NA		NA	NA	Finland	Negative	0	0	0	0	0	77	0
SRR10055345	7432931	1873098612	252	P3603_217	WGS	RANDOM	GENOMIC	PAIRED	ILLUMINA	Illumina HiSeq 2500	PRJNA516678	SAMN12671608	KL2_7_bond	not applicable	not applicable	missing	Sweden: Gotland	whole individual	larval/pupal	NA	male	NA	drone	NA	larval/pupal	male	NA		NA	NA	Sweden	Negative	0	0	0	0	0	239	0
SRR10055309	7416718	1869012936	252	P3603_229	WGS	RANDOM	GENOMIC	PAIRED	ILLUMINA	Illumina HiSeq 2500	PRJNA516678	SAMN12671640	NW1_9_bond	not applicable	not applicable	missing	Sweden: Gotland	whole individual	larval/pupal	NA	male	NA	drone	NA	larval/pupal	male	NA		NA	NA	Sweden	Negative	0	0	0	0	0	0	0
SRR10055318	7372992	1857993984	252	P3603_171	WGS	RANDOM	GENOMIC	PAIRED	ILLUMINA	Illumina HiSeq 2500	PRJNA516678	SAMN12671632	NB1_1_al	not applicable	not applicable	missing	Finland: Aland	whole individual	larval/pupal	NA	male	NA	drone	NA	larval/pupal	male	NA		NA	NA	Finland	Negative	0	0	0	0	0	162	0
SRR10055276	7324911	1845877572	252	P3603_259	WGS	RANDOM	GENOMIC	PAIRED	ILLUMINA	Illumina HiSeq 2500	PRJNA516678	SAMN12671669	NW5_10_bond	not applicable	not applicable	missing	Sweden: Gotland	whole individual	larval/pupal	NA	male	NA	drone	NA	larval/pupal	male	NA		NA	NA	Sweden	Negative	0	0	0	0	0	338	0
SRR10055265	7278345	1834142940	252	P3603_101	WGS	RANDOM	GENOMIC	PAIRED	ILLUMINA	Illumina HiSeq 2500	PRJNA516678	SAMN12671680	T3_1_al	not applicable	not applicable	missing	Finland: Aland	whole individual	larval/pupal	NA	male	NA	drone	NA	larval/pupal	male	NA		NA	NA	Finland	Negative	0	0	0	0	0	118	0
SRR10055314	7272788	1832742576	252	P3603_173	WGS	RANDOM	GENOMIC	PAIRED	ILLUMINA	Illumina HiSeq 2500	PRJNA516678	SAMN12671634	NB1_3_al	not applicable	not applicable	missing	Finland: Aland	whole individual	larval/pupal	NA	male	NA	drone	NA	larval/pupal	male	NA		NA	NA	Finland	Negative	0	0	0	0	0	178	0
SRR10055277	7269692	1831962384	252	P3603_258	WGS	RANDOM	GENOMIC	PAIRED	ILLUMINA	Illumina HiSeq 2500	PRJNA516678	SAMN12671668	NW5_9_bond	not applicable	not applicable	missing	Sweden: Gotland	whole individual	larval/pupal	NA	male	NA	drone	NA	larval/pupal	male	NA		NA	NA	Sweden	Negative	0	0	0	0	0	0	0
SRR10055288	7245318	1825820136	252	P3603_249	WGS	RANDOM	GENOMIC	PAIRED	ILLUMINA	Illumina HiSeq 2500	PRJNA516678	SAMN12671659	NW4_10_bond	not applicable	not applicable	missing	Sweden: Gotland	whole individual	larval/pupal	NA	male	NA	drone	NA	larval/pupal	male	NA		NA	NA	Sweden	Negative	0	0	0	0	0	371	0
SRR10055344	7239944	1824465888	252	P3603_151	WGS	RANDOM	GENOMIC	PAIRED	ILLUMINA	Illumina HiSeq 2500	PRJNA516678	SAMN12671612	N1_1_al	not applicable	not applicable	missing	Finland: Aland	whole individual	larval/pupal	NA	male	NA	drone	NA	larval/pupal	male	NA		NA	NA	Finland	Negative	0	0	0	0	0	108	0
SRR10055307	7213853	1817890956	252	P3603_223	WGS	RANDOM	GENOMIC	PAIRED	ILLUMINA	Illumina HiSeq 2500	PRJNA516678	SAMN12671644	NW1_3_bond	not applicable	not applicable	missing	Sweden: Gotland	whole individual	larval/pupal	NA	male	NA	drone	NA	larval/pupal	male	NA		NA	NA	Sweden	Negative	0	0	0	0	0	229	0
SRR10055252	7128155	1796295060	252	P3603_113	WGS	RANDOM	GENOMIC	PAIRED	ILLUMINA	Illumina HiSeq 2500	PRJNA516678	SAMN12671692	TB1_3_al	not applicable	not applicable	missing	Finland: Aland	whole individual	larval/pupal	NA	male	NA	drone	NA	larval/pupal	male	NA		NA	NA	Finland	Negative	0	0	0	0	0	0	0
SRR10055311	7124558	1795388616	252	P3603_177	WGS	RANDOM	GENOMIC	PAIRED	ILLUMINA	Illumina HiSeq 2500	PRJNA516678	SAMN12671638	NB1_7_al	not applicable	not applicable	missing	Finland: Aland	whole individual	larval/pupal	NA	male	NA	drone	NA	larval/pupal	male	NA		NA	NA	Finland	Negative	0	0	0	0	0	171	0
SRR10055267	7109417	1791573084	252	P3603_257	WGS	RANDOM	GENOMIC	PAIRED	ILLUMINA	Illumina HiSeq 2500	PRJNA516678	SAMN12671677	NW5_8_bond	not applicable	not applicable	missing	Sweden: Gotland	whole individual	larval/pupal	NA	male	NA	drone	NA	larval/pupal	male	NA		NA	NA	Sweden	Negative	0	0	0	0	0	218	0
SRR10055375	7079374	1784002248	252	P3603_149	WGS	RANDOM	GENOMIC	PAIRED	ILLUMINA	Illumina HiSeq 2500	PRJNA516678	SAMN12671580	K5_9_al	not applicable	not applicable	missing	Finland: Aland	whole individual	larval/pupal	NA	male	NA	drone	NA	larval/pupal	male	NA		NA	NA	Finland	Negative	0	0	0	0	0	184	0
SRR10055235	7076283	1783223316	252	P3603_126	WGS	RANDOM	GENOMIC	PAIRED	ILLUMINA	Illumina HiSeq 2500	PRJNA516678	SAMN12671705	TC2_6_al	not applicable	not applicable	missing	Finland: Aland	whole individual	larval/pupal	NA	male	NA	drone	NA	larval/pupal	male	NA		NA	NA	Finland	Negative	0	0	0	0	0	56	0
SRR10055362	6999161	1763788572	252	P3603_201	WGS	RANDOM	GENOMIC	PAIRED	ILLUMINA	Illumina HiSeq 2500	PRJNA516678	SAMN12671592	KL1_1_bond	not applicable	not applicable	missing	Sweden: Gotland	whole individual	larval/pupal	NA	male	NA	drone	NA	larval/pupal	male	NA		NA	NA	Sweden	Negative	0	0	0	0	0	0	0
SRR10055107	6933771	1747310292	252	P3603_269	WGS	RANDOM	GENOMIC	PAIRED	ILLUMINA	Illumina HiSeq 2500	PRJNA516678	SAMN12671551	FB_B12_10_bond	not applicable	not applicable	missing	Sweden: Gotland	whole individual	larval/pupal	NA	male	NA	drone	NA	larval/pupal	male	NA		NA	NA	Sweden	Negative	0	0	0	0	0	212	0
SRR10055310	6883035	1734524820	252	P3603_178	WGS	RANDOM	GENOMIC	PAIRED	ILLUMINA	Illumina HiSeq 2500	PRJNA516678	SAMN12671639	NB1_8_al	not applicable	not applicable	missing	Finland: Aland	whole individual	larval/pupal	NA	male	NA	drone	NA	larval/pupal	male	NA		NA	NA	Finland	Negative	0	0	0	0	0	246	0
SRR10055264	6877562	1733145624	252	P3603_102	WGS	RANDOM	GENOMIC	PAIRED	ILLUMINA	Illumina HiSeq 2500	PRJNA516678	SAMN12671681	T3_2_al	not applicable	not applicable	missing	Finland: Aland	whole individual	larval/pupal	NA	male	NA	drone	NA	larval/pupal	male	NA		NA	NA	Finland	Negative	0	0	0	0	0	144	0
SRR10055382	6861084	1728993168	252	P3603_132	WGS	RANDOM	GENOMIC	PAIRED	ILLUMINA	Illumina HiSeq 2500	PRJNA516678	SAMN12671573	GF2_2_al	not applicable	not applicable	missing	Finland: Aland	whole individual	larval/pupal	NA	male	NA	drone	NA	larval/pupal	male	NA		NA	NA	Finland	Negative	0	0	0	0	0	0	0
SRR10055337	6856297	1727786844	252	P3603_154	WGS	RANDOM	GENOMIC	PAIRED	ILLUMINA	Illumina HiSeq 2500	PRJNA516678	SAMN12671615	N1_4_al	not applicable	not applicable	missing	Finland: Aland	whole individual	larval/pupal	NA	male	NA	drone	NA	larval/pupal	male	NA		NA	NA	Finland	Negative	0	0	0	0	0	149	0
SRR10055336	6832553	1721803356	252	P3603_155	WGS	RANDOM	GENOMIC	PAIRED	ILLUMINA	Illumina HiSeq 2500	PRJNA516678	SAMN12671616	N1_5_al	not applicable	not applicable	missing	Finland: Aland	whole individual	larval/pupal	NA	male	NA	drone	NA	larval/pupal	male	NA		NA	NA	Finland	Negative	0	0	0	0	0	231	0
SRR10055325	6786542	1710208584	252	P3603_165	WGS	RANDOM	GENOMIC	PAIRED	ILLUMINA	Illumina HiSeq 2500	PRJNA516678	SAMN12671626	N4_5_al	not applicable	not applicable	missing	Finland: Aland	whole individual	larval/pupal	NA	male	NA	drone	NA	larval/pupal	male	NA		NA	NA	Finland	Negative	0	0	0	0	0	136	0
SRR10055377	6774465	1707165180	252	P3603_141	WGS	RANDOM	GENOMIC	PAIRED	ILLUMINA	Illumina HiSeq 2500	PRJNA516678	SAMN12671582	K5_1_al	not applicable	not applicable	missing	Finland: Aland	whole individual	larval/pupal	NA	male	NA	drone	NA	larval/pupal	male	NA		NA	NA	Finland	Negative	0	0	0	0	0	179	0
SRR10055266	6774307	1707125364	252	P3603_110	WGS	RANDOM	GENOMIC	PAIRED	ILLUMINA	Illumina HiSeq 2500	PRJNA516678	SAMN12671679	T3_10_al	not applicable	not applicable	missing	Finland: Aland	whole individual	larval/pupal	NA	male	NA	drone	NA	larval/pupal	male	NA		NA	NA	Finland	Negative	0	0	0	0	0	0	0
SRR10055386	6704179	1689453108	252	P3603_140	WGS	RANDOM	GENOMIC	PAIRED	ILLUMINA	Illumina HiSeq 2500	PRJNA516678	SAMN12671571	GF2_10_al	not applicable	not applicable	missing	Finland: Aland	whole individual	larval/pupal	NA	male	NA	drone	NA	larval/pupal	male	NA		NA	NA	Finland	Negative	0	0	0	0	0	122	0
SRR10055313	6700020	1688405040	252	P3603_174	WGS	RANDOM	GENOMIC	PAIRED	ILLUMINA	Illumina HiSeq 2500	PRJNA516678	SAMN12671635	NB1_4_al	not applicable	not applicable	missing	Finland: Aland	whole individual	larval/pupal	NA	male	NA	drone	NA	larval/pupal	male	NA		NA	NA	Finland	Negative	0	0	0	0	0	286	0
SRR10055369	6699158	1688187816	252	P3603_148	WGS	RANDOM	GENOMIC	PAIRED	ILLUMINA	Illumina HiSeq 2500	PRJNA516678	SAMN12671589	K5_8_al	not applicable	not applicable	missing	Finland: Aland	whole individual	larval/pupal	NA	male	NA	drone	NA	larval/pupal	male	NA		NA	NA	Finland	Negative	0	0	0	0	0	175	0
SRR10055346	6571090	1655914680	252	P3603_216	WGS	RANDOM	GENOMIC	PAIRED	ILLUMINA	Illumina HiSeq 2500	PRJNA516678	SAMN12671607	KL2_6_bond	not applicable	not applicable	missing	Sweden: Gotland	whole individual	larval/pupal	NA	male	NA	drone	NA	larval/pupal	male	NA		NA	NA	Sweden	Negative	0	0	0	0	0	356	0
SRR10055245	6567087	1654905924	252	P3603_118	WGS	RANDOM	GENOMIC	PAIRED	ILLUMINA	Illumina HiSeq 2500	PRJNA516678	SAMN12671697	TB1_8_al	not applicable	not applicable	missing	Finland: Aland	whole individual	larval/pupal	NA	male	NA	drone	NA	larval/pupal	male	NA		NA	NA	Finland	Negative	0	0	0	0	0	0	0
SRR10055381	6538518	1647706536	252	P3603_134	WGS	RANDOM	GENOMIC	PAIRED	ILLUMINA	Illumina HiSeq 2500	PRJNA516678	SAMN12671575	GF2_4_al	not applicable	not applicable	missing	Finland: Aland	whole individual	larval/pupal	NA	male	NA	drone	NA	larval/pupal	male	NA		NA	NA	Finland	Negative	0	0	0	0	0	297	0
SRR10055315	6497016	1637248032	252	P3603_176	WGS	RANDOM	GENOMIC	PAIRED	ILLUMINA	Illumina HiSeq 2500	PRJNA516678	SAMN12671637	NB1_6_al	not applicable	not applicable	missing	Finland: Aland	whole individual	larval/pupal	NA	male	NA	drone	NA	larval/pupal	male	NA		NA	NA	Finland	Negative	0	0	0	0	0	195	0
SRR10055096	6481579	1633357908	252	P3603_270	WGS	RANDOM	GENOMIC	PAIRED	ILLUMINA	Illumina HiSeq 2500	PRJNA516678	SAMN12671562	FB_B14_1_bond	not applicable	not applicable	missing	Sweden: Gotland	whole individual	larval/pupal	NA	male	NA	drone	NA	larval/pupal	male	NA		NA	NA	Sweden	Negative	0	0	0	0	0	263	0
SRR10055341	6469634	1630347768	252	P3603_160	WGS	RANDOM	GENOMIC	PAIRED	ILLUMINA	Illumina HiSeq 2500	PRJNA516678	SAMN12671611	N1_10_al	not applicable	not applicable	missing	Finland: Aland	whole individual	larval/pupal	NA	male	NA	drone	NA	larval/pupal	male	NA		NA	NA	Finland	Negative	0	0	0	0	0	112	0
SRR10055293	6464269	1628995788	252	P3603_235	WGS	RANDOM	GENOMIC	PAIRED	ILLUMINA	Illumina HiSeq 2500	PRJNA516678	SAMN12671654	NW3_5_bond	not applicable	not applicable	missing	Sweden: Gotland	whole individual	larval/pupal	NA	male	NA	drone	NA	larval/pupal	male	NA		NA	NA	Sweden	Negative	0	0	0	0	0	0	0
SRR10055351	6437742	1622310984	252	P3603_211	WGS	RANDOM	GENOMIC	PAIRED	ILLUMINA	Illumina HiSeq 2500	PRJNA516678	SAMN12671602	KL2_1_bond	not applicable	not applicable	missing	Sweden: Gotland	whole individual	larval/pupal	NA	male	NA	drone	NA	larval/pupal	male	NA		NA	NA	Sweden	Negative	0	0	0	0	0	317	0
SRR10055302	6428727	1620039204	252	P3603_225	WGS	RANDOM	GENOMIC	PAIRED	ILLUMINA	Illumina HiSeq 2500	PRJNA516678	SAMN12671646	NW1_5_bond	not applicable	not applicable	missing	Sweden: Gotland	whole individual	larval/pupal	NA	male	NA	drone	NA	larval/pupal	male	NA		NA	NA	Sweden	Negative	0	0	0	0	0	206	0
SRR10055268	6416641	1616993532	252	P3603_256	WGS	RANDOM	GENOMIC	PAIRED	ILLUMINA	Illumina HiSeq 2500	PRJNA516678	SAMN12671676	NW5_7_bond	not applicable	not applicable	missing	Sweden: Gotland	whole individual	larval/pupal	NA	male	NA	drone	NA	larval/pupal	male	NA		NA	NA	Sweden	Negative	0	0	0	0	0	282	0
SRR10055285	6412248	1615886496	252	P3603_241	WGS	RANDOM	GENOMIC	PAIRED	ILLUMINA	Illumina HiSeq 2500	PRJNA516678	SAMN12671661	NW4_2_bond	not applicable	not applicable	missing	Sweden: Gotland	whole individual	larval/pupal	NA	male	NA	drone	NA	larval/pupal	male	NA		NA	NA	Sweden	Negative	0	0	0	0	0	197	0
SRR10055238	6377181	1607049612	252	P3603_124	WGS	RANDOM	GENOMIC	PAIRED	ILLUMINA	Illumina HiSeq 2500	PRJNA516678	SAMN12671703	TC2_4_al	not applicable	not applicable	missing	Finland: Aland	whole individual	larval/pupal	NA	male	NA	drone	NA	larval/pupal	male	NA		NA	NA	Finland	Negative	0	0	0	0	0	0	0
SRR10055300	6331936	1595647872	252	P3603_227	WGS	RANDOM	GENOMIC	PAIRED	ILLUMINA	Illumina HiSeq 2500	PRJNA516678	SAMN12671648	NW1_7_bond	not applicable	not applicable	missing	Sweden: Gotland	whole individual	larval/pupal	NA	male	NA	drone	NA	larval/pupal	male	NA		NA	NA	Sweden	Negative	0	0	0	0	0	157	0
SRR10055342	6216512	1566561024	252	P3603_159	WGS	RANDOM	GENOMIC	PAIRED	ILLUMINA	Illumina HiSeq 2500	PRJNA516678	SAMN12671610	N1_9_al	not applicable	not applicable	missing	Finland: Aland	whole individual	larval/pupal	NA	male	NA	drone	NA	larval/pupal	male	NA		NA	NA	Finland	Negative	0	0	0	0	0	135	0
SRR10055233	6208368	1564508736	252	P3603_128	WGS	RANDOM	GENOMIC	PAIRED	ILLUMINA	Illumina HiSeq 2500	PRJNA516678	SAMN12671707	TC2_8_al	not applicable	not applicable	missing	Finland: Aland	whole individual	larval/pupal	NA	male	NA	drone	NA	larval/pupal	male	NA		NA	NA	Finland	Negative	0	0	0	0	0	17	0
SRR10055374	6197419	1561749588	252	P3603_150	WGS	RANDOM	GENOMIC	PAIRED	ILLUMINA	Illumina HiSeq 2500	PRJNA516678	SAMN12671581	K5_10_al	not applicable	not applicable	missing	Finland: Aland	whole individual	larval/pupal	NA	male	NA	drone	NA	larval/pupal	male	NA		NA	NA	Finland	Negative	0	0	0	0	0	171	0
SRR10055320	6166601	1553983452	252	P3603_179	WGS	RANDOM	GENOMIC	PAIRED	ILLUMINA	Illumina HiSeq 2500	PRJNA516678	SAMN12671630	NB1_9_al	not applicable	not applicable	missing	Finland: Aland	whole individual	larval/pupal	NA	male	NA	drone	NA	larval/pupal	male	NA		NA	NA	Finland	Negative	0	0	0	0	0	0	0
SRR10055326	6028453	1519170156	252	P3603_164	WGS	RANDOM	GENOMIC	PAIRED	ILLUMINA	Illumina HiSeq 2500	PRJNA516678	SAMN12671625	N4_4_al	not applicable	not applicable	missing	Finland: Aland	whole individual	larval/pupal	NA	male	NA	drone	NA	larval/pupal	male	NA		NA	NA	Finland	Negative	0	0	0	0	0	121	0
SRR10055247	5964466	1503045432	252	P3603_115	WGS	RANDOM	GENOMIC	PAIRED	ILLUMINA	Illumina HiSeq 2500	PRJNA516678	SAMN12671694	TB1_5_al	not applicable	not applicable	missing	Finland: Aland	whole individual	larval/pupal	NA	male	NA	drone	NA	larval/pupal	male	NA		NA	NA	Finland	Negative	0	0	0	0	0	124	0
SRR10055390	5956234	1500970968	252	P3603_274	WGS	RANDOM	GENOMIC	PAIRED	ILLUMINA	Illumina HiSeq 2500	PRJNA516678	SAMN12671566	FB_B14_5_bond	not applicable	not applicable	missing	Sweden: Gotland	whole individual	larval/pupal	NA	male	NA	drone	NA	larval/pupal	male	NA		NA	NA	Sweden	Negative	0	0	0	0	0	154	0
SRR10055270	5888956	1484016912	252	P3603_109	WGS	RANDOM	GENOMIC	PAIRED	ILLUMINA	Illumina HiSeq 2500	PRJNA516678	SAMN12671678	T3_9_al	not applicable	not applicable	missing	Finland: Aland	whole individual	larval/pupal	NA	male	NA	drone	NA	larval/pupal	male	NA		NA	NA	Finland	Negative	0	0	0	0	0	129	0
SRR10055274	5888702	1483952904	252	P3603_252	WGS	RANDOM	GENOMIC	PAIRED	ILLUMINA	Illumina HiSeq 2500	PRJNA516678	SAMN12671672	NW5_3_bond	not applicable	not applicable	missing	Sweden: Gotland	whole individual	larval/pupal	NA	male	NA	drone	NA	larval/pupal	male	NA		NA	NA	Sweden	Negative	0	0	0	0	0	0	0
SRR10055316	5886072	1483290144	252	P3603_172	WGS	RANDOM	GENOMIC	PAIRED	ILLUMINA	Illumina HiSeq 2500	PRJNA516678	SAMN12671633	NB1_2_al	not applicable	not applicable	missing	Finland: Aland	whole individual	larval/pupal	NA	male	NA	drone	NA	larval/pupal	male	NA		NA	NA	Finland	Negative	0	0	0	0	0	317	0
SRR10055389	5849637	1474108524	252	P3603_276	WGS	RANDOM	GENOMIC	PAIRED	ILLUMINA	Illumina HiSeq 2500	PRJNA516678	SAMN12671568	FB_B14_7_bond	not applicable	not applicable	missing	Sweden: Gotland	whole individual	larval/pupal	NA	male	NA	drone	NA	larval/pupal	male	NA		NA	NA	Sweden	Negative	0	0	0	0	0	160	0
SRR10055335	5656765	1425504780	252	P3603_156	WGS	RANDOM	GENOMIC	PAIRED	ILLUMINA	Illumina HiSeq 2500	PRJNA516678	SAMN12671617	N1_6_al	not applicable	not applicable	missing	Finland: Aland	whole individual	larval/pupal	NA	male	NA	drone	NA	larval/pupal	male	NA		NA	NA	Finland	Negative	0	0	0	0	0	114	0
SRR10055394	5638856	1420991712	252	P3603_271	WGS	RANDOM	GENOMIC	PAIRED	ILLUMINA	Illumina HiSeq 2500	PRJNA516678	SAMN12671563	FB_B14_2_bond	not applicable	not applicable	missing	Sweden: Gotland	whole individual	larval/pupal	NA	male	NA	drone	NA	larval/pupal	male	NA		NA	NA	Sweden	Negative	0	0	0	0	0	207	0
SRR10055393	5503607	1386908964	252	P3603_275	WGS	RANDOM	GENOMIC	PAIRED	ILLUMINA	Illumina HiSeq 2500	PRJNA516678	SAMN12671567	FB_B14_6_bond	not applicable	not applicable	missing	Sweden: Gotland	whole individual	larval/pupal	NA	male	NA	drone	NA	larval/pupal	male	NA		NA	NA	Sweden	Negative	0	0	0	0	0	0	0
SRR10055249	5497879	1385465508	252	P3603_117	WGS	RANDOM	GENOMIC	PAIRED	ILLUMINA	Illumina HiSeq 2500	PRJNA516678	SAMN12671696	TB1_7_al	not applicable	not applicable	missing	Finland: Aland	whole individual	larval/pupal	NA	male	NA	drone	NA	larval/pupal	male	NA		NA	NA	Finland	Negative	0	0	0	0	0	127	0
SRR10055376	5473002	1379196504	252	P3603_138	WGS	RANDOM	GENOMIC	PAIRED	ILLUMINA	Illumina HiSeq 2500	PRJNA516678	SAMN12671579	GF2_8_al	not applicable	not applicable	missing	Finland: Aland	whole individual	larval/pupal	NA	male	NA	drone	NA	larval/pupal	male	NA		NA	NA	Finland	Negative	0	0	0	0	0	275	0
SRR10055319	5411559	1363712868	252	P3603_180	WGS	RANDOM	GENOMIC	PAIRED	ILLUMINA	Illumina HiSeq 2500	PRJNA516678	SAMN12671631	NB1_10_al	not applicable	not applicable	missing	Finland: Aland	whole individual	larval/pupal	NA	male	NA	drone	NA	larval/pupal	male	NA		NA	NA	Finland	Negative	0	0	0	0	0	170	0
SRR10055334	5384679	1356939108	252	P3603_157	WGS	RANDOM	GENOMIC	PAIRED	ILLUMINA	Illumina HiSeq 2500	PRJNA516678	SAMN12671618	N1_7_al	not applicable	not applicable	missing	Finland: Aland	whole individual	larval/pupal	NA	male	NA	drone	NA	larval/pupal	male	NA		NA	NA	Finland	Negative	0	0	0	0	0	92	0
SRR10055324	5378555	1355395860	252	P3603_166	WGS	RANDOM	GENOMIC	PAIRED	ILLUMINA	Illumina HiSeq 2500	PRJNA516678	SAMN12671627	N4_6_al	not applicable	not applicable	missing	Finland: Aland	whole individual	larval/pupal	NA	male	NA	drone	NA	larval/pupal	male	NA		NA	NA	Finland	Negative	0	0	0	0	0	0	0
SRR10055321	5238303	1320052356	252	P3603_168	WGS	RANDOM	GENOMIC	PAIRED	ILLUMINA	Illumina HiSeq 2500	PRJNA516678	SAMN12671629	N4_8_al	not applicable	not applicable	missing	Finland: Aland	whole individual	larval/pupal	NA	male	NA	drone	NA	larval/pupal	male	NA		NA	NA	Finland	Negative	0	0	0	0	0	132	0
SRR10055299	5217616	1314839232	252	P3603_233	WGS	RANDOM	GENOMIC	PAIRED	ILLUMINA	Illumina HiSeq 2500	PRJNA516678	SAMN12671652	NW3_3_bond	not applicable	not applicable	missing	Sweden: Gotland	whole individual	larval/pupal	NA	male	NA	drone	NA	larval/pupal	male	NA		NA	NA	Sweden	Negative	0	0	0	0	0	183	0
SRR10055246	5128809	1292459868	252	P3603_116	WGS	RANDOM	GENOMIC	PAIRED	ILLUMINA	Illumina HiSeq 2500	PRJNA516678	SAMN12671695	TB1_6_al	not applicable	not applicable	missing	Finland: Aland	whole individual	larval/pupal	NA	male	NA	drone	NA	larval/pupal	male	NA		NA	NA	Finland	Negative	0	0	0	0	0	190	0
SRR10055294	5061128	1275404256	252	P3603_234	WGS	RANDOM	GENOMIC	PAIRED	ILLUMINA	Illumina HiSeq 2500	PRJNA516678	SAMN12671653	NW3_4_bond	not applicable	not applicable	missing	Sweden: Gotland	whole individual	larval/pupal	NA	male	NA	drone	NA	larval/pupal	male	NA		NA	NA	Sweden	Negative	0	0	0	0	0	225	0
SRR10055304	5036100	1269097200	252	P3603_222	WGS	RANDOM	GENOMIC	PAIRED	ILLUMINA	Illumina HiSeq 2500	PRJNA516678	SAMN12671643	NW1_2_bond	not applicable	not applicable	missing	Sweden: Gotland	whole individual	larval/pupal	NA	male	NA	drone	NA	larval/pupal	male	NA		NA	NA	Sweden	Negative	0	0	0	0	0	0	0
SRR2911292	12657618	2531523600	200		WGS	unspecified	GENOMIC	PAIRED	ILLUMINA	Illumina HiSeq 2000	PRJNA301648	SAMN04252026	Xinyuan_002	NA	NA	NA	China: Xinyuan2	muscle	NA	NA	female	&lt;1	NA	NA	NA	female	NA		NA	NA	China	Negative	0	0	0	0	0	156	0
SRR2912416	10536614	2107322800	200		WGS	unspecified	GENOMIC	PAIRED	ILLUMINA	Illumina HiSeq 2000	PRJNA301648	SAMN04252029	Xinyuan_005	NA	NA	NA	China: Xinyuan5	muscle	NA	NA	female	&lt;1	NA	NA	NA	female	NA		NA	NA	China	Negative	0	0	0	0	0	0	0
SRR2912419	9475555	1895111000	200		WGS	unspecified	GENOMIC	PAIRED	ILLUMINA	Illumina HiSeq 2000	PRJNA301648	SAMN04252032	Xinyuan_008	NA	NA	NA	China: Xinyuan8	muscle	NA	NA	female	&lt;1	NA	NA	NA	female	NA		NA	NA	China	Negative	0	0	0	0	0	160	0
SRR2912418	9323129	1864625800	200		WGS	unspecified	GENOMIC	PAIRED	ILLUMINA	Illumina HiSeq 2000	PRJNA301648	SAMN04252031	Xinyuan_007	NA	NA	NA	China: Xinyuan7	muscle	NA	NA	female	&lt;1	NA	NA	NA	female	NA		NA	NA	China	Negative	0	0	0	0	0	78	0
SRR2912414	9204729	1840945800	200		WGS	unspecified	GENOMIC	PAIRED	ILLUMINA	Illumina HiSeq 2000	PRJNA301648	SAMN04252027	Xinyuan_003	NA	NA	NA	China: Xinyuan3	muscle	NA	NA	female	&lt;1	NA	NA	NA	female	NA		NA	NA	China	Negative	0	0	0	0	0	114	0
SRR2912421	9170487	1834097400	200		WGS	unspecified	GENOMIC	PAIRED	ILLUMINA	Illumina HiSeq 2000	PRJNA301648	SAMN04252034	Xinyuan_010	NA	NA	NA	China: Xinyuan10	muscle	NA	NA	female	&lt;1	NA	NA	NA	female	NA		NA	NA	China	Negative	0	0	0	0	0	149	0
SRR2912415	8777544	1755508800	200		WGS	unspecified	GENOMIC	PAIRED	ILLUMINA	Illumina HiSeq 2000	PRJNA301648	SAMN04252028	Xinyuan_004	NA	NA	NA	China: Xinyuan4	muscle	NA	NA	female	&lt;1	NA	NA	NA	female	NA		NA	NA	China	Negative	0	0	0	0	0	95	0
SRR2912417	8297363	1659472600	200		WGS	unspecified	GENOMIC	PAIRED	ILLUMINA	Illumina HiSeq 2000	PRJNA301648	SAMN04252030	Xinyuan_006	NA	NA	NA	China: Xinyuan6	muscle	NA	NA	female	&lt;1	NA	NA	NA	female	NA		NA	NA	China	Negative	0	0	0	0	0	102	0
SRR2912420	8272128	1654425600	200		WGS	unspecified	GENOMIC	PAIRED	ILLUMINA	Illumina HiSeq 2000	PRJNA301648	SAMN04252033	Xinyuan_009	NA	NA	NA	China: Xinyuan9	muscle	NA	NA	female	&lt;1	NA	NA	NA	female	NA		NA	NA	China	Negative	0	0	0	0	0	149	0
SRR2911291	8206005	1641201000	200		WGS	unspecified	GENOMIC	PAIRED	ILLUMINA	Illumina HiSeq 2000	PRJNA301648	SAMN04252025	Xinyuan_001	NA	NA	NA	China: Xinyuan1	muscle	NA	NA	female	&lt;1	NA	NA	NA	female	NA		NA	NA	China	Negative	0	0	0	0	0	83	0
SRR10571998	59541094	17862328200	300	3_M_113	WGS	unspecified	GENOMIC	PAIRED	ILLUMINA	Illumina NovaSeq 6000	PRJNA592197	SAMN13415881	F1_Mother	RSA2017_177_1	RSA2017_177	1/29/2018	South Africa: Stellenbosch	thorax muscles	NA	NA	female	NA	NA	NA	NA	female	thorax		NA	NA	South Africa	Negative	0	0	0	0	0	247	220
SRR11038095	40959648	12369813696	302	HILO_Hu13	WGS	RANDOM PCR	GENOMIC	PAIRED	ILLUMINA	Illumina HiSeq 4000	PRJNA605407	SAMN14056805	Hilo3	Honey Bee	Colony	2019-11	USA:Louisiana	Whole body	NA	NA	female	NA	NA	NA	NA	female	whole body		NA	NA	USA	Negative	0	0	0	0	0	139	4
SRR8468977	101648780	30496243540	300	709503.Apis33.P19.TH.core	WGS	RANDOM	GENOMIC	PAIRED	ILLUMINA	Illumina HiSeq 4000	PRJNA507348	SAMN10784750	709503_Apis33_P19_TH_core	709503.Apis33.P19.TH.core	Beehive, offspring of a naturally mated Cape Honeybee queen from the Cape of Good Hope peninsula	2016	South Africa: Cape of Good Hope region	whole body	NA	NA	female	NA	NA	NA	NA	female	whole body		NA	NA	South Africa	Negative	0	0	0	0	0	66	175
SRR5270368	89840111	8984011100	100	Kenya_S4	WGS	RANDOM	GENOMIC	SINGLE	ILLUMINA	Illumina HiSeq 2000	PRJNA294105	SAMN06342758	Kenya_S4	worker bee	not applicable	1995	Kenya: Africa replicate 4	whole body	NA	NA	female	adult	NA	NA	NA	female	whole body		NA	NA	Kenya	Negative	0	0	0	0	0	6	63
SRR10312485	72054681	21392876607	296	Apis_capensis_clone_2016_4	WGS	RANDOM	GENOMIC	PAIRED	ILLUMINA	Illumina HiSeq 4000	PRJNA507349	SAMN13057260	Apis_capensis_clone_2016_4	2016_individual4	Apis scutellata beehives in Pretoria region	2016	South Africa: Gauteng, Pretoria	whole body	NA	NA	female	NA	NA	NA	NA	female	whole body		NA	NA	South Africa	Negative	0	0	0	0	0	18	22
SRR8468937	65017744	19537909538	300	703505.Apis51.P36.AR.core	WGS	RANDOM	GENOMIC	PAIRED	ILLUMINA	Illumina HiSeq 4000	PRJNA507348	SAMN10784732	703505_Apis51_P36_AR_core	703505.Apis51.P36.AR.core	Beehive, offspring of a naturally mated Cape Honeybee queen from the Cape of Good Hope peninsula	2016	South Africa: Cape of Good Hope region	whole body	NA	NA	female	NA	NA	NA	NA	female	whole body		NA	NA	South Africa	Negative	0	0	0	0	0	219	112
SRR8468957	35122223	10546638622	300	708505.Apis56.P12.AR.core-extended	WGS	RANDOM	GENOMIC	PAIRED	ILLUMINA	Illumina HiSeq 4000	PRJNA507348	SAMN10784762	708505_Apis56_P12_AR_core-extended	708505.Apis56.P12.AR.core-extended	Beehive, offspring of a naturally mated Cape Honeybee queen from the Cape of Good Hope peninsula	2016	South Africa: Cape of Good Hope region	whole body	NA	NA	female	NA	NA	NA	NA	female	whole body		NA	NA	South Africa	Negative	0	0	0	0	0	0	0
SRR8468941	33970647	10200178368	300	706505.Apis54.P09.AR	WGS	RANDOM	GENOMIC	PAIRED	ILLUMINA	Illumina HiSeq 4000	PRJNA507348	SAMN10784780	706505_Apis54_P09_AR	706505.Apis54.P09.AR	Beehive, offspring of a naturally mated Cape Honeybee queen from the Cape of Good Hope peninsula	2016	South Africa: Cape of Good Hope region	whole body	NA	NA	female	NA	NA	NA	NA	female	whole body		NA	NA	South Africa	Negative	0	0	0	0	0	2	268
SRR8468950	31041856	9322218828	300	707501.Apis7.P02.TH.core	WGS	RANDOM	GENOMIC	PAIRED	ILLUMINA	Illumina HiSeq 4000	PRJNA507348	SAMN10784747	707501_Apis7_P02_TH_core	707501.Apis7.P02.TH.core	Beehive, offspring of a naturally mated Cape Honeybee queen from the Cape of Good Hope peninsula	2016	South Africa: Cape of Good Hope region	whole body	NA	NA	female	NA	NA	NA	NA	female	whole body		NA	NA	South Africa	Negative	0	0	0	0	0	92	320
SRR8468978	29869782	8971177432	300	702505.Apis50.P31.TH	WGS	RANDOM	GENOMIC	PAIRED	ILLUMINA	Illumina HiSeq 4000	PRJNA507348	SAMN10784774	702505_Apis50_P31_TH	702505.Apis50.P31.TH	Beehive, offspring of a naturally mated Cape Honeybee queen from the Cape of Good Hope peninsula	2016	South Africa: Cape of Good Hope region	whole body	NA	NA	female	NA	NA	NA	NA	female	whole body		NA	NA	South Africa	Negative	0	0	0	0	0	0	0
SRR8468983	28344190	8512699790	300	704501.Apis4.P22.TH.core-extended	WGS	RANDOM	GENOMIC	PAIRED	ILLUMINA	Illumina HiSeq 4000	PRJNA507348	SAMN10784757	704501_Apis4_P22_TH_core-extended	704501.Apis4.P22.TH.core-extended	Beehive, offspring of a naturally mated Cape Honeybee queen from the Cape of Good Hope peninsula	2016	South Africa: Cape of Good Hope region	whole body	NA	NA	female	NA	NA	NA	NA	female	whole body		NA	NA	South Africa	Negative	0	0	0	0	0	0	0
SRR8468965	27827560	8354584752	300	711505.Apis59.P05.AR.core-extended	WGS	RANDOM	GENOMIC	PAIRED	ILLUMINA	Illumina HiSeq 4000	PRJNA507348	SAMN10784767	711505_Apis59_P05_AR_core-extended	711505.Apis59.P05.AR.core-extended	Beehive, offspring of a naturally mated Cape Honeybee queen from the Cape of Good Hope peninsula	2016	South Africa: Cape of Good Hope region	whole body	NA	NA	female	NA	NA	NA	NA	female	whole body		NA	NA	South Africa	Negative	0	0	0	0	0	138	240
SRR8468973	27747147	8337469152	300	703501.Apis3.P22.TH.core-extended	WGS	RANDOM	GENOMIC	PAIRED	ILLUMINA	Illumina HiSeq 4000	PRJNA507348	SAMN10784755	703501_Apis3_P22_TH_core-extended	703501.Apis3.P22.TH.core-extended	Beehive, offspring of a naturally mated Cape Honeybee queen from the Cape of Good Hope peninsula	2016	South Africa: Cape of Good Hope region	whole body	NA	NA	female	NA	NA	NA	NA	female	whole body		NA	NA	South Africa	Negative	0	0	0	0	0	2	221
SRR8468958	27139908	8151745292	300	704505.Apis52.P29.TH	WGS	RANDOM	GENOMIC	PAIRED	ILLUMINA	Illumina HiSeq 4000	PRJNA507348	SAMN10784776	704505_Apis52_P29_TH	704505.Apis52.P29.TH	Beehive, offspring of a naturally mated Cape Honeybee queen from the Cape of Good Hope peninsula	2016	South Africa: Cape of Good Hope region	whole body	NA	NA	female	NA	NA	NA	NA	female	whole body		NA	NA	South Africa	Negative	0	0	0	0	0	0	0
SRR8468930	24490362	7352017040	300	703503.Apis27.P34.AR.core	WGS	RANDOM	GENOMIC	PAIRED	ILLUMINA	Illumina HiSeq 4000	PRJNA507348	SAMN10784731	703503_Apis27_P34_AR_core	703503.Apis27.P34.AR.core	Beehive, offspring of a naturally mated Cape Honeybee queen from the Cape of Good Hope peninsula	2016	South Africa: Cape of Good Hope region	whole body	NA	NA	female	NA	NA	NA	NA	female	whole body		NA	NA	South Africa	Negative	0	0	0	0	0	70	121
SRR8468975	23533645	7068826538	300	708503.Apis32.P08.TH.core	WGS	RANDOM	GENOMIC	PAIRED	ILLUMINA	Illumina HiSeq 4000	PRJNA507348	SAMN10784749	708503_Apis32_P08_TH_core	708503.Apis32.P08.TH.core	Beehive, offspring of a naturally mated Cape Honeybee queen from the Cape of Good Hope peninsula	2016	South Africa: Cape of Good Hope region	whole body	NA	NA	female	NA	NA	NA	NA	female	whole body		NA	NA	South Africa	Negative	0	0	0	0	0	119	133
SRR8468996	23497537	7060751234	300	707505.Apis55.P21.AR.core-extended	WGS	RANDOM	GENOMIC	PAIRED	ILLUMINA	Illumina HiSeq 4000	PRJNA507348	SAMN10784760	707505_Apis55_P21_AR_core-extended	707505.Apis55.P21.AR.core-extended	Beehive, offspring of a naturally mated Cape Honeybee queen from the Cape of Good Hope peninsula	2016	South Africa: Cape of Good Hope region	whole body	NA	NA	female	NA	NA	NA	NA	female	whole body		NA	NA	South Africa	Negative	0	0	0	0	0	42	182
SRR8468980	22934472	6886282438	300	702503.Apis26.P09.TH	WGS	RANDOM	GENOMIC	PAIRED	ILLUMINA	Illumina HiSeq 4000	PRJNA507348	SAMN10784772	702503_Apis26_P09_TH	702503.Apis26.P09.TH	Beehive, offspring of a naturally mated Cape Honeybee queen from the Cape of Good Hope peninsula	2016	South Africa: Cape of Good Hope region	whole body	NA	NA	female	NA	NA	NA	NA	female	whole body		NA	NA	South Africa	Negative	0	0	0	0	0	87	263
SRR8468956	22188501	6664738968	300	710505.Apis58.P22.TH.core-extended	WGS	RANDOM	GENOMIC	PAIRED	ILLUMINA	Illumina HiSeq 4000	PRJNA507348	SAMN10784764	710505_Apis58_P22_TH_core-extended	710505.Apis58.P22.TH.core-extended	Beehive, offspring of a naturally mated Cape Honeybee queen from the Cape of Good Hope peninsula	2016	South Africa: Cape of Good Hope region	whole body	NA	NA	female	NA	NA	NA	NA	female	whole body		NA	NA	South Africa	Negative	0	0	0	0	0	130	183
SRR8468927	21279105	6394513806	300	705503.Apis29.P11.AR.core	WGS	RANDOM	GENOMIC	PAIRED	ILLUMINA	Illumina HiSeq 4000	PRJNA507348	SAMN10784736	705503_Apis29_P11_AR_core	705503.Apis29.P11.AR.core	Beehive, offspring of a naturally mated Cape Honeybee queen from the Cape of Good Hope peninsula	2016	South Africa: Cape of Good Hope region	whole body	NA	NA	female	NA	NA	NA	NA	female	whole body		NA	NA	South Africa	Negative	0	0	0	0	0	9	223
SRR8468974	21114469	6345024482	300	707503.Apis31.P22.TH.core	WGS	RANDOM	GENOMIC	PAIRED	ILLUMINA	Illumina HiSeq 4000	PRJNA507348	SAMN10784748	707503_Apis31_P22_TH_core	707503.Apis31.P22.TH.core	Beehive, offspring of a naturally mated Cape Honeybee queen from the Cape of Good Hope peninsula	2016	South Africa: Cape of Good Hope region	whole body	NA	NA	female	NA	NA	NA	NA	female	whole body		NA	NA	South Africa	Negative	0	0	0	0	0	0	0
SRR8468971	20385903	6123067826	300	701505.Apis49.P24.TH.core-extended	WGS	RANDOM	GENOMIC	PAIRED	ILLUMINA	Illumina HiSeq 4000	PRJNA507348	SAMN10784754	701505_Apis49_P24_TH_core-extended	701505.Apis49.P24.TH.core-extended	Beehive, offspring of a naturally mated Cape Honeybee queen from the Cape of Good Hope peninsula	2016	South Africa: Cape of Good Hope region	whole body	NA	NA	female	NA	NA	NA	NA	female	whole body		NA	NA	South Africa	Negative	0	0	0	0	0	87	437
SRR8468976	19870202	5967116188	300	709505.Apis57.P23.TH.core	WGS	RANDOM	GENOMIC	PAIRED	ILLUMINA	Illumina HiSeq 4000	PRJNA507348	SAMN10784751	709505_Apis57_P23_TH_core	709505.Apis57.P23.TH.core	Beehive, offspring of a naturally mated Cape Honeybee queen from the Cape of Good Hope peninsula	2016	South Africa: Cape of Good Hope region	whole body	NA	NA	female	NA	NA	NA	NA	female	whole body		NA	NA	South Africa	Negative	0	0	0	0	0	230	196
SRR8468929	19544651	5868661144	300	702501.Apis2.P23.TH	WGS	RANDOM	GENOMIC	PAIRED	ILLUMINA	Illumina HiSeq 4000	PRJNA507348	SAMN10784770	702501_Apis2_P23_TH	702501.Apis2.P23.TH	Beehive, offspring of a naturally mated Cape Honeybee queen from the Cape of Good Hope peninsula	2016	South Africa: Cape of Good Hope region	whole body	NA	NA	female	NA	NA	NA	NA	female	whole body		NA	NA	South Africa	Negative	0	0	0	0	0	110	117
SRR8468994	19101133	5735645198	300	712505.Apis60.P17.TH	WGS	RANDOM	GENOMIC	PAIRED	ILLUMINA	Illumina HiSeq 4000	PRJNA507348	SAMN10784796	712505_Apis60_P17_TH	712505.Apis60.P17.TH	Beehive, offspring of a naturally mated Cape Honeybee queen from the Cape of Good Hope peninsula	2016	South Africa: Cape of Good Hope region	whole body	NA	NA	female	NA	NA	NA	NA	female	whole body		NA	NA	South Africa	Negative	0	0	0	0	0	0	248
SRR10312487	18619264	5550318656	298	Apis_capensis_clone_2016_2	WGS	RANDOM	GENOMIC	PAIRED	ILLUMINA	Illumina HiSeq 4000	PRJNA507349	SAMN13057258	Apis_capensis_clone_2016_2	2016_individual2	Apis scutellata beehives in Pretoria region	2016	South Africa: Gauteng, Pretoria	whole body	NA	NA	female	NA	NA	NA	NA	female	whole body		NA	NA	South Africa	Negative	0	0	0	0	0	138	218
SRR8468940	18374788	5520092986	300	706501.Apis6.P24.TH	WGS	RANDOM	GENOMIC	PAIRED	ILLUMINA	Illumina HiSeq 4000	PRJNA507348	SAMN10784778	706501_Apis6_P24_TH	706501.Apis6.P24.TH	Beehive, offspring of a naturally mated Cape Honeybee queen from the Cape of Good Hope peninsula	2016	South Africa: Cape of Good Hope region	whole body	NA	NA	female	NA	NA	NA	NA	female	whole body		NA	NA	South Africa	Negative	0	0	0	0	0	0	0
SRR8468946	18070729	5426550694	300	704503.Apis28.P16.TH.core	WGS	RANDOM	GENOMIC	PAIRED	ILLUMINA	Illumina HiSeq 4000	PRJNA507348	SAMN10784743	704503_Apis28_P16_TH_core	704503.Apis28.P16.TH.core	Beehive, offspring of a naturally mated Cape Honeybee queen from the Cape of Good Hope peninsula	2016	South Africa: Cape of Good Hope region	whole body	NA	NA	female	NA	NA	NA	NA	female	whole body		NA	NA	South Africa	Negative	0	0	0	0	0	83	160
SRR8468944	17587047	5282132548	300	701501.Apis1.P01.TH.core	WGS	RANDOM	GENOMIC	PAIRED	ILLUMINA	Illumina HiSeq 4000	PRJNA507348	SAMN10784741	701501_Apis1_P01_TH_core	701501.Apis1.P01.TH.core	Beehive, offspring of a naturally mated Cape Honeybee queen from the Cape of Good Hope peninsula	2016	South Africa: Cape of Good Hope region	whole body	NA	NA	female	NA	NA	NA	NA	female	whole body		NA	NA	South Africa	Negative	0	0	0	0	0	73	178
SRR8468961	16628430	4996640428	300	705505.Apis53.P04.AR	WGS	RANDOM	GENOMIC	PAIRED	ILLUMINA	Illumina HiSeq 4000	PRJNA507348	SAMN10784777	705505_Apis53_P04_AR	705505.Apis53.P04.AR	Beehive, offspring of a naturally mated Cape Honeybee queen from the Cape of Good Hope peninsula	2016	South Africa: Cape of Good Hope region	whole body	NA	NA	female	NA	NA	NA	NA	female	whole body		NA	NA	South Africa	Negative	0	0	0	0	0	0	0
SRR8468990	15958916	4795504210	300	711501.Apis11.P13.AR	WGS	RANDOM	GENOMIC	PAIRED	ILLUMINA	Illumina HiSeq 4000	PRJNA507348	SAMN10784791	711501_Apis11_P13_AR	711501.Apis11.P13.AR	Beehive, offspring of a naturally mated Cape Honeybee queen from the Cape of Good Hope peninsula	2016	South Africa: Cape of Good Hope region	whole body	NA	NA	female	NA	NA	NA	NA	female	whole body		NA	NA	South Africa	Negative	0	0	0	0	0	154	232
SRR8468947	15845493	4760161070	300	706503.Apis30.P10.TH.core	WGS	RANDOM	GENOMIC	PAIRED	ILLUMINA	Illumina HiSeq 4000	PRJNA507348	SAMN10784745	706503_Apis30_P10_TH_core	706503.Apis30.P10.TH.core	Beehive, offspring of a naturally mated Cape Honeybee queen from the Cape of Good Hope peninsula	2016	South Africa: Cape of Good Hope region	whole body	NA	NA	female	NA	NA	NA	NA	female	whole body		NA	NA	South Africa	Negative	0	0	0	0	0	0	249
SRR8468926	15029658	4513153004	300	709501.Apis9.P20.TH	WGS	RANDOM	GENOMIC	PAIRED	ILLUMINA	Illumina HiSeq 4000	PRJNA507348	SAMN10784785	709501_Apis9_P20_TH	709501.Apis9.P20.TH	Beehive, offspring of a naturally mated Cape Honeybee queen from the Cape of Good Hope peninsula	2016	South Africa: Cape of Good Hope region	whole body	NA	NA	female	NA	NA	NA	NA	female	whole body		NA	NA	South Africa	Negative	0	0	0	0	0	2	192
SRR8468963	14408874	4326144594	300	712501.Apis12.P24.AR	WGS	RANDOM	GENOMIC	PAIRED	ILLUMINA	Illumina HiSeq 4000	PRJNA507348	SAMN10784795	712501_Apis12_P24_AR	712501.Apis12.P24.AR	Beehive, offspring of a naturally mated Cape Honeybee queen from the Cape of Good Hope peninsula	2016	South Africa: Cape of Good Hope region	whole body	NA	NA	female	NA	NA	NA	NA	female	whole body		NA	NA	South Africa	Negative	0	0	0	0	0	128	351
SRR8468959	12833569	3854297048	300	711503.Apis35.P19.TH	WGS	RANDOM	GENOMIC	PAIRED	ILLUMINA	Illumina HiSeq 4000	PRJNA507348	SAMN10784792	711503_Apis35_P19_TH	711503.Apis35.P19.TH	Beehive, offspring of a naturally mated Cape Honeybee queen from the Cape of Good Hope peninsula	2016	South Africa: Cape of Good Hope region	whole body	NA	NA	female	NA	NA	NA	NA	female	whole body		NA	NA	South Africa	Negative	0	0	0	0	0	5	158
SRR8468955	12709744	3817088616	300	710501.Apis10.P21.AR-core-extended	WGS	RANDOM	GENOMIC	PAIRED	ILLUMINA	Illumina HiSeq 4000	PRJNA507348	SAMN10784763	710501_Apis10_P21_AR-core-extended	710501.Apis10.P21.AR-core-extended	Beehive, offspring of a naturally mated Cape Honeybee queen from the Cape of Good Hope peninsula	2016	South Africa: Cape of Good Hope region	whole body	NA	NA	female	NA	NA	NA	NA	female	whole body		NA	NA	South Africa	Negative	0	0	0	0	0	0	0
SRR8468972	11666780	3506168642	300	712503.Apis36.P25.TH.core	WGS	RANDOM	GENOMIC	PAIRED	ILLUMINA	Illumina HiSeq 4000	PRJNA507348	SAMN10784753	712503_Apis36_P25_TH_core	712503.Apis36.P25.TH.core	Beehive, offspring of a naturally mated Cape Honeybee queen from the Cape of Good Hope peninsula	2016	South Africa: Cape of Good Hope region	whole body	NA	NA	female	NA	NA	NA	NA	female	whole body		NA	NA	South Africa	Negative	0	0	0	0	0	104	138
SRR8468949	10392516	3122650714	300	705501.Apis5.P26.TH.core	WGS	RANDOM	GENOMIC	PAIRED	ILLUMINA	Illumina HiSeq 4000	PRJNA507348	SAMN10784744	705501_Apis5_P26_TH_core	705501.Apis5.P26.TH.core	Beehive, offspring of a naturally mated Cape Honeybee queen from the Cape of Good Hope peninsula	2016	South Africa: Cape of Good Hope region	whole body	NA	NA	female	NA	NA	NA	NA	female	whole body		NA	NA	South Africa	Negative	0	0	0	0	0	61	225
SRR8468987	7879190	2367758252	300	710503.Apis34.P14.AR	WGS	RANDOM	GENOMIC	PAIRED	ILLUMINA	Illumina HiSeq 4000	PRJNA507348	SAMN10784789	710503_Apis34_P14_AR	710503.Apis34.P14.AR	Beehive, offspring of a naturally mated Cape Honeybee queen from the Cape of Good Hope peninsula	2016	South Africa: Cape of Good Hope region	whole body	NA	NA	female	NA	NA	NA	NA	female	whole body		NA	NA	South Africa	Negative	0	0	0	0	0	0	0
SRR8468960	7229517	2172535608	300	701503.Apis25.P33.TH	WGS	RANDOM	GENOMIC	PAIRED	ILLUMINA	Illumina HiSeq 4000	PRJNA507348	SAMN10784798	701503_Apis25_P33_TH	701503.Apis25.P33.TH	Beehive, offspring of a naturally mated Cape Honeybee queen from the Cape of Good Hope peninsula	2016	South Africa: Cape of Good Hope region	whole body	NA	NA	female	NA	NA	NA	NA	female	whole body		NA	NA	South Africa	Negative	0	0	0	0	0	105	209
SRR10714369	86311571	16461595369	190	Sample_S70	WGS	RANDOM	GENOMIC	PAIRED	ILLUMINA	Illumina HiSeq 2500	PRJNA596071	SAMN13611966	S70	7	drone	2014	Slovenia: Ljubljana	flight muscle	NA	NA	male	NA	NA	NA	NA	male	thorax		NA	NA	Slovenia	Negative	0	0	0	0	0	0	0
SRR10714394	85181205	16339082085	191	Sample_S44	WGS	RANDOM	GENOMIC	PAIRED	ILLUMINA	Illumina HiSeq 2500	PRJNA596071	SAMN13611943	S44	2	drone	2014	Germany: Aufhausen	flight muscle	NA	NA	male	NA	NA	NA	NA	male	thorax		NA	NA	Germany	Negative	0	0	0	0	0	0	0
SRR10714399	81490808	15677742411	192	Sample_S40	WGS	RANDOM	GENOMIC	PAIRED	ILLUMINA	Illumina HiSeq 2500	PRJNA596071	SAMN13611939	S40	2	drone	6/25/2014	Germany: Mayen	flight muscle	NA	NA	male	NA	NA	NA	NA	male	thorax		NA	NA	Germany	Negative	0	0	0	0	0	0	0
SRR10714410	76364207	14822537208	194	Sample_S28	WGS	RANDOM	GENOMIC	PAIRED	ILLUMINA	Illumina HiSeq 2500	PRJNA596071	SAMN13611929	S28	2	drone	2014	Germany: LIB	flight muscle	NA	NA	male	NA	NA	NA	NA	male	thorax		NA	NA	Germany	Negative	0	0	0	0	0	0	0
SRR10714362	74907489	14546617342	194	Sample_NL2	WGS	RANDOM	GENOMIC	PAIRED	ILLUMINA	Illumina HiSeq 2500	PRJNA596071	SAMN13611972	NL2	NA	drone	2014	Germany: Brandenburg	flight muscle	NA	NA	male	NA	NA	NA	NA	male	thorax		NA	NA	Germany	Negative	0	0	0	0	0	0	0
SRR10714403	71637916	13999359997	195	Sample_S35	WGS	RANDOM	GENOMIC	PAIRED	ILLUMINA	Illumina HiSeq 2500	PRJNA596071	SAMN13611935	S35	9	drone	2014	Slovenia: Ljubljana	flight muscle	NA	NA	male	NA	NA	NA	NA	male	thorax		NA	NA	Slovenia	Negative	0	0	0	0	0	0	0
SRR10714378	70914812	13837908132	195	Sample_S60	WGS	RANDOM	GENOMIC	PAIRED	ILLUMINA	Illumina HiSeq 2500	PRJNA596071	SAMN13611958	S60	NA	drone	7/16/2014	Germany: Muenchsdorf	flight muscle	NA	NA	male	NA	NA	NA	NA	male	thorax		NA	NA	Germany	Negative	0	0	0	0	0	0	0
SRR10714406	62562218	12180608508	194	Sample_S31	WGS	RANDOM	GENOMIC	PAIRED	ILLUMINA	Illumina HiSeq 2500	PRJNA596071	SAMN13611932	S31	NA	drone	2014	Germany: Sendenhorst	flight muscle	NA	NA	male	NA	NA	NA	NA	male	thorax		NA	NA	Germany	Negative	0	0	0	0	0	0	0
SRR10714389	61143700	11861394515	193	Sample_S49	WGS	RANDOM	GENOMIC	PAIRED	ILLUMINA	Illumina HiSeq 2500	PRJNA596071	SAMN13611948	S49	3	drone	2014	Norway: Vikesa	flight muscle	NA	NA	male	NA	NA	NA	NA	male	thorax		NA	NA	Norway	Negative	0	0	0	0	0	0	0
SRR10714388	60545683	11764025641	194	Sample_S50	WGS	RANDOM	GENOMIC	PAIRED	ILLUMINA	Illumina HiSeq 2500	PRJNA596071	SAMN13611949	S50	4	drone	2014	Norway: Vikesa	flight muscle	NA	NA	male	NA	NA	NA	NA	male	thorax		NA	NA	Norway	Negative	0	0	0	0	0	0	0
SRR10714361	60030855	11755174960	195	Sample_S8	WGS	RANDOM	GENOMIC	PAIRED	ILLUMINA	Illumina HiSeq 2500	PRJNA596071	SAMN13611919	S8	NA	drone	5/22/2014	Austria: Sankt Veit im Pongau	flight muscle	NA	NA	male	NA	NA	NA	NA	male	thorax		NA	NA	Austria	Negative	0	0	0	0	0	0	0
SRR10714400	59526287	11624818812	195	Sample_S39	WGS	RANDOM	GENOMIC	PAIRED	ILLUMINA	Illumina HiSeq 2500	PRJNA596071	SAMN13611938	S39	1	drone	6/25/2014	Germany: Mayen	flight muscle	NA	NA	male	NA	NA	NA	NA	male	thorax		NA	NA	Germany	Negative	0	0	0	0	0	0	0
SRR10714393	59441654	11401631499	191	Sample_S45	WGS	RANDOM	GENOMIC	PAIRED	ILLUMINA	Illumina HiSeq 2500	PRJNA596071	SAMN13611944	S45	3	drone	2014	Germany: Aufhausen	flight muscle	NA	NA	male	NA	NA	NA	NA	male	thorax		NA	NA	Germany	Negative	0	0	0	0	0	0	0
SRR10714398	58306136	11251840647	192	Sample_S41	WGS	RANDOM	GENOMIC	PAIRED	ILLUMINA	Illumina HiSeq 2500	PRJNA596071	SAMN13611940	S41	3	drone	6/25/2014	Germany: Mayen	flight muscle	NA	NA	male	NA	NA	NA	NA	male	thorax		NA	NA	Germany	Negative	0	0	0	0	0	0	0
SRR10714374	58056942	11405582984	196	Sample_S6	WGS	RANDOM	GENOMIC	PAIRED	ILLUMINA	Illumina HiSeq 2500	PRJNA596071	SAMN13611917	S6	3	drone	5/22/2014	Germany: Altshausen	flight muscle	NA	NA	male	NA	NA	NA	NA	male	thorax		NA	NA	Germany	Negative	0	0	0	0	0	0	0
SRR10714366	57382823	11205924514	195	Sample_S74	WGS	RANDOM	GENOMIC	PAIRED	ILLUMINA	Illumina HiSeq 2500	PRJNA596071	SAMN13611969	S74	NA	drone	8/5/2014	Germany: Hamminkeln	flight muscle	NA	NA	male	NA	NA	NA	NA	male	thorax		NA	NA	Germany	Negative	0	0	0	0	0	6	0
SRR10714413	57034040	11178185214	195	Sample_S22	WGS	RANDOM	GENOMIC	PAIRED	ILLUMINA	Illumina HiSeq 2500	PRJNA596071	SAMN13611926	S22	NA	drone	5/27/2014	Germany: Schleiden	flight muscle	NA	NA	male	NA	NA	NA	NA	male	thorax		NA	NA	Germany	Negative	0	0	0	0	0	0	0
SRR10714360	57004427	11170328774	195	Sample_S10	WGS	RANDOM	GENOMIC	PAIRED	ILLUMINA	Illumina HiSeq 2500	PRJNA596071	SAMN13611920	S10	NA	drone	5/23/2014	Germany: Luetjensee	flight muscle	NA	NA	male	NA	NA	NA	NA	male	thorax		NA	NA	Germany	Negative	0	0	0	0	0	0	0
SRR10714381	56864728	11092434836	195	Sample_S57	WGS	RANDOM	GENOMIC	PAIRED	ILLUMINA	Illumina HiSeq 2500	PRJNA596071	SAMN13611955	S57	NA	drone	7/11/2014	Austria: Lunz am See	flight muscle	NA	NA	male	NA	NA	NA	NA	male	thorax		NA	NA	Austria	Negative	0	0	0	0	0	0	0
SRR10714390	56663198	11094907841	195	Sample_S48	WGS	RANDOM	GENOMIC	PAIRED	ILLUMINA	Illumina HiSeq 2500	PRJNA596071	SAMN13611947	S48	2	drone	2014	Norway: Vikesa	flight muscle	NA	NA	male	NA	NA	NA	NA	male	thorax		NA	NA	Norway	Negative	0	0	0	0	0	0	0
SRR10714402	56019914	10944291446	195	Sample_S36	WGS	RANDOM	GENOMIC	PAIRED	ILLUMINA	Illumina HiSeq 2500	PRJNA596071	SAMN13611936	S36	10	drone	2014	Slovenia: Ljubljana	flight muscle	NA	NA	male	NA	NA	NA	NA	male	thorax		NA	NA	Slovenia	Negative	0	0	0	0	0	0	0
SRR10714383	55791245	10905589373	195	Sample_S54	WGS	RANDOM	GENOMIC	PAIRED	ILLUMINA	Illumina HiSeq 2500	PRJNA596071	SAMN13611953	S54	NA	drone	2014	Germany: Steinhagen	flight muscle	NA	NA	male	NA	NA	NA	NA	male	thorax		NA	NA	Germany	Negative	0	0	0	0	0	2	0
SRR10714373	55410928	10871663315	196	Sample_S66	WGS	RANDOM	GENOMIC	PAIRED	ILLUMINA	Illumina HiSeq 2500	PRJNA596071	SAMN13611962	S66	3	drone	2014	Slovenia: Ljubljana	flight muscle	NA	NA	male	NA	NA	NA	NA	male	thorax		NA	NA	Slovenia	Negative	0	0	0	0	0	0	0
SRR10714370	54681367	10555380694	193	Sample_S69	WGS	RANDOM	GENOMIC	PAIRED	ILLUMINA	Illumina HiSeq 2500	PRJNA596071	SAMN13611965	S69	6	drone	2014	Slovenia: Ljubljana	flight muscle	NA	NA	male	NA	NA	NA	NA	male	thorax		NA	NA	Slovenia	Negative	0	0	0	0	0	0	0
SRR10714391	54651348	10634293655	194	Sample_S47	WGS	RANDOM	GENOMIC	PAIRED	ILLUMINA	Illumina HiSeq 2500	PRJNA596071	SAMN13611946	S47	1	drone	2014	Norway: Vikesa	flight muscle	NA	NA	male	NA	NA	NA	NA	male	thorax		NA	NA	Norway	Negative	0	0	0	0	0	26	0
SRR10714407	53759754	10407101286	193	Sample_S3	WGS	RANDOM	GENOMIC	PAIRED	ILLUMINA	Illumina HiSeq 2500	PRJNA596071	SAMN13611914	S3	NA	drone	2014	Germany: Burgoberbach	flight muscle	NA	NA	male	NA	NA	NA	NA	male	thorax		NA	NA	Germany	Negative	0	0	0	0	0	0	0
SRR10714387	53455031	10421911662	194	Sample_S51	WGS	RANDOM	GENOMIC	PAIRED	ILLUMINA	Illumina HiSeq 2500	PRJNA596071	SAMN13611950	S51	NA	drone	7/8/2014	Germany: Hoppegarten	flight muscle	NA	NA	male	NA	NA	NA	NA	male	thorax		NA	NA	Germany	Negative	0	0	0	0	0	5	0
SRR10714376	53069610	10421709012	196	Sample_S64	WGS	RANDOM	GENOMIC	PAIRED	ILLUMINA	Illumina HiSeq 2500	PRJNA596071	SAMN13611960	S64	1	drone	2014	Slovenia: Ljubljana	flight muscle	NA	NA	male	NA	NA	NA	NA	male	thorax		NA	NA	Slovenia	Negative	0	0	0	0	0	1453	0
SRR10714363	52247049	10163094483	194	Sample_S7	WGS	RANDOM	GENOMIC	PAIRED	ILLUMINA	Illumina HiSeq 2500	PRJNA596071	SAMN13611918	S7	NA	drone	5/22/2014	Germany: Flintbek	flight muscle	NA	NA	male	NA	NA	NA	NA	male	thorax		NA	NA	Germany	Negative	0	0	0	0	0	0	0
SRR10714385	51433454	10022326358	194	Sample_S5	WGS	RANDOM	GENOMIC	PAIRED	ILLUMINA	Illumina HiSeq 2500	PRJNA596071	SAMN13611916	S5	2	drone	5/22/2014	Germany: Altshausen	flight muscle	NA	NA	male	NA	NA	NA	NA	male	thorax		NA	NA	Germany	Negative	0	0	0	0	0	0	0
SRR10714397	51395971	9946003432	193	Sample_S42	WGS	RANDOM	GENOMIC	PAIRED	ILLUMINA	Illumina HiSeq 2500	PRJNA596071	SAMN13611941	S42	NA	drone	2014	Switzerland: Azmoos	flight muscle	NA	NA	male	NA	NA	NA	NA	male	thorax		NA	NA	Switzerland	Negative	0	0	0	0	0	4	0
SRR10714405	51231191	10068869689	196	Sample_S33	WGS	RANDOM	GENOMIC	PAIRED	ILLUMINA	Illumina HiSeq 2500	PRJNA596071	SAMN13611933	S33	1	drone	6/24/2014	Germany: Frontenhausen	flight muscle	NA	NA	male	NA	NA	NA	NA	male	thorax		NA	NA	Germany	Negative	0	0	0	0	0	0	0
SRR10714415	49573767	9696878843	195	Sample_S19	WGS	RANDOM	GENOMIC	PAIRED	ILLUMINA	Illumina HiSeq 2500	PRJNA596071	SAMN13611924	S19	NA	drone	5/27/2014	Germany: Nettersheim	flight muscle	NA	NA	male	NA	NA	NA	NA	male	thorax		NA	NA	Germany	Negative	0	0	0	0	0	0	0
SRR10714392	49305784	9621236404	195	Sample_S46	WGS	RANDOM	GENOMIC	PAIRED	ILLUMINA	Illumina HiSeq 2500	PRJNA596071	SAMN13611945	S46	NA	drone	2014	Austria: Hall in Tirol	flight muscle	NA	NA	male	NA	NA	NA	NA	male	thorax		NA	NA	Austria	Negative	0	0	0	0	0	1353	0
SRR10714372	49288770	9654622199	195	Sample_S67	WGS	RANDOM	GENOMIC	PAIRED	ILLUMINA	Illumina HiSeq 2500	PRJNA596071	SAMN13611963	S67	4	drone	2014	Slovenia: Ljubljana	flight muscle	NA	NA	male	NA	NA	NA	NA	male	thorax		NA	NA	Slovenia	Negative	0	0	0	0	0	0	0
SRR10714375	49143805	9602707695	195	Sample_S65	WGS	RANDOM	GENOMIC	PAIRED	ILLUMINA	Illumina HiSeq 2500	PRJNA596071	SAMN13611961	S65	2	drone	2014	Slovenia: Ljubljana	flight muscle	NA	NA	male	NA	NA	NA	NA	male	thorax		NA	NA	Slovenia	Negative	0	0	0	0	0	0	0
SRR10714384	48790813	9545877328	195	Sample_S53	WGS	RANDOM	GENOMIC	PAIRED	ILLUMINA	Illumina HiSeq 2500	PRJNA596071	SAMN13611952	S53	NA	drone	2014	Switzerland: Vitters	flight muscle	NA	NA	male	NA	NA	NA	NA	male	thorax		NA	NA	Switzerland	Negative	0	0	0	0	0	0	0
SRR10714359	48261453	9420245274	195	Sample_S11	WGS	RANDOM	GENOMIC	PAIRED	ILLUMINA	Illumina HiSeq 2500	PRJNA596071	SAMN13611921	S11	NA	drone	5/23/2014	Germany: Kirchhain	flight muscle	NA	NA	male	NA	NA	NA	NA	male	thorax		NA	NA	Germany	Negative	0	0	0	0	0	0	0
SRR10714382	48254072	9499132009	196	Sample_S55	WGS	RANDOM	GENOMIC	PAIRED	ILLUMINA	Illumina HiSeq 2500	PRJNA596071	SAMN13611954	S55	NA	drone	7/9/2014	Austria: Weisskirchen	flight muscle	NA	NA	male	NA	NA	NA	NA	male	thorax		NA	NA	Austria	Negative	0	0	0	0	0	0	0
SRR10714409	47040178	9178244262	195	Sample_S29	WGS	RANDOM	GENOMIC	PAIRED	ILLUMINA	Illumina HiSeq 2500	PRJNA596071	SAMN13611930	S29	NA	drone	6/12/2014	Germany: LIB	flight muscle	NA	NA	male	NA	NA	NA	NA	male	thorax		NA	NA	Germany	Negative	0	0	0	0	0	0	0
SRR10714411	46530468	9110549630	195	Sample_S24	WGS	RANDOM	GENOMIC	PAIRED	ILLUMINA	Illumina HiSeq 2500	PRJNA596071	SAMN13611928	S24	NA	drone	5/27/2014	Germany: Tostedt	flight muscle	NA	NA	male	NA	NA	NA	NA	male	thorax		NA	NA	Germany	Negative	0	0	0	0	0	0	0
SRR10714417	45144555	8848802802	196	Sample_S16	WGS	RANDOM	GENOMIC	PAIRED	ILLUMINA	Illumina HiSeq 2500	PRJNA596071	SAMN13611922	S16	NA	drone	2014	Germany: Hamburg	flight muscle	NA	NA	male	NA	NA	NA	NA	male	thorax		NA	NA	Germany	Negative	0	0	0	0	0	0	0
SRR10714416	44303553	8677272156	195	Sample_S17	WGS	RANDOM	GENOMIC	PAIRED	ILLUMINA	Illumina HiSeq 2500	PRJNA596071	SAMN13611923	S17	NA	drone	5/26/2014	Germany: Veghelde	flight muscle	NA	NA	male	NA	NA	NA	NA	male	thorax		NA	NA	Germany	Negative	0	0	0	0	0	0	0
SRR10714368	44069913	8667249519	196	Sample_S71	WGS	RANDOM	GENOMIC	PAIRED	ILLUMINA	Illumina HiSeq 2500	PRJNA596071	SAMN13611967	S71	8	drone	2014	Slovenia: Ljubljana	flight muscle	NA	NA	male	NA	NA	NA	NA	male	thorax		NA	NA	Slovenia	Negative	0	0	0	0	0	0	0
SRR10714395	43170982	8329768990	192	Sample_S43	WGS	RANDOM	GENOMIC	PAIRED	ILLUMINA	Illumina HiSeq 2500	PRJNA596071	SAMN13611942	S43	1	drone	2014	Germany: Aufhausen	flight muscle	NA	NA	male	NA	NA	NA	NA	male	thorax		NA	NA	Germany	Negative	0	0	0	0	0	0	0
SRR10714404	42769195	8341597870	195	Sample_S34	WGS	RANDOM	GENOMIC	PAIRED	ILLUMINA	Illumina HiSeq 2500	PRJNA596071	SAMN13611934	S34	2	drone	6/24/2014	Germany: Frontenhausen	flight muscle	NA	NA	male	NA	NA	NA	NA	male	thorax		NA	NA	Germany	Negative	0	0	0	0	0	0	0
SRR10714386	42410757	8229119337	194	Sample_S52	WGS	RANDOM	GENOMIC	PAIRED	ILLUMINA	Illumina HiSeq 2500	PRJNA596071	SAMN13611951	S52	NA	drone	7/8/2014	Germany: Crostau	flight muscle	NA	NA	male	NA	NA	NA	NA	male	thorax		NA	NA	Germany	Negative	0	0	0	0	0	195	0
SRR10714412	40291480	7874009826	195	Sample_S23	WGS	RANDOM	GENOMIC	PAIRED	ILLUMINA	Illumina HiSeq 2500	PRJNA596071	SAMN13611927	S23	NA	drone	5/27/2014	Germany: Wittlich	flight muscle	NA	NA	male	NA	NA	NA	NA	male	thorax		NA	NA	Germany	Negative	0	0	0	0	0	2	0
SRR10714364	37538276	7310694447	194	Sample_NL1	WGS	RANDOM	GENOMIC	PAIRED	ILLUMINA	Illumina HiSeq 2500	PRJNA596071	SAMN13611971	NL1	NA	drone	2014	Germany: Ihlow	flight muscle	NA	NA	male	NA	NA	NA	NA	male	thorax		NA	NA	Germany	Negative	0	0	0	0	0	0	0
SRR10714371	37473163	7237615042	193	Sample_S68	WGS	RANDOM	GENOMIC	PAIRED	ILLUMINA	Illumina HiSeq 2500	PRJNA596071	SAMN13611964	S68	5	drone	2014	Slovenia: Ljubljana	flight muscle	NA	NA	male	NA	NA	NA	NA	male	thorax		NA	NA	Slovenia	Negative	0	0	0	0	0	0	0
SRR10714379	36487272	7144285826	195	Sample_S59	WGS	RANDOM	GENOMIC	PAIRED	ILLUMINA	Illumina HiSeq 2500	PRJNA596071	SAMN13611957	S59	2	drone	2014	Austria: Lunz am See	flight muscle	NA	NA	male	NA	NA	NA	NA	male	thorax		NA	NA	Austria	Negative	0	0	0	0	0	0	0
SRR10714419	36449119	7011575900	192	Sample_S1	WGS	RANDOM	GENOMIC	PAIRED	ILLUMINA	Illumina HiSeq 2500	PRJNA596071	SAMN13611912	S1	NA	drone	5/20/2014	Germany: Suedbrookmerland	flight muscle	NA	NA	male	NA	NA	NA	NA	male	thorax		NA	NA	Germany	Negative	0	0	0	0	0	0	0
SRR10714418	35461424	6868220460	193	Sample_S2	WGS	RANDOM	GENOMIC	PAIRED	ILLUMINA	Illumina HiSeq 2500	PRJNA596071	SAMN13611913	S2	NA	drone	2014	Germany: Bayrisch Gmain	flight muscle	NA	NA	male	NA	NA	NA	NA	male	thorax		NA	NA	Germany	Negative	0	0	0	0	0	0	0
SRR10714414	35448709	6924628622	195	Sample_S21	WGS	RANDOM	GENOMIC	PAIRED	ILLUMINA	Illumina HiSeq 2500	PRJNA596071	SAMN13611925	S21	1	drone	5/27/2014	Germany: Tostedt	flight muscle	NA	NA	male	NA	NA	NA	NA	male	thorax		NA	NA	Germany	Negative	0	0	0	0	0	0	0
SRR10714380	31939008	6287616161	196	Sample_S58	WGS	RANDOM	GENOMIC	PAIRED	ILLUMINA	Illumina HiSeq 2500	PRJNA596071	SAMN13611956	S58	1	drone	2014	Austria: Lunz am See	flight muscle	NA	NA	male	NA	NA	NA	NA	male	thorax		NA	NA	Austria	Negative	0	0	0	0	0	8	0
SRR15173429	32039888	9611966400	300	BS16-194-M2_TCCGGAGA-ATAGAGGC-BHCFFJDSXX_L003	WGS	size fractionation	GENOMIC	PAIRED	ILLUMINA	Illumina NovaSeq 6000	PRJNA311274	SAMN20257467	BS16-194-M2	BS16-194-M2	Hive	2014	France: Vaucluse	thorax	NA	NA	male	NA	NA	NA	NA	male	thorax		NA	NA	France	Negative	0	0	0	0	0	125	0
SRR7252446	16456959	4937087700	300	E9	WGS	RANDOM	GENOMIC	PAIRED	ILLUMINA	HiSeq X Ten	PRJNA473430	SAMN09273560	E9	Drone	Haute-Garonne	2017-06	France	Thorax	NA	NA	male	Pupa	NA	NA	NA	male	thorax		NA	NA	France	Negative	0	0	0	0	0	202	0
SRR7252441	15695066	4708519800	300	D1	WGS	RANDOM	GENOMIC	PAIRED	ILLUMINA	HiSeq X Ten	PRJNA473430	SAMN09273576	D1	Drone	Haute-Garonne	2017-06	France	Thorax	NA	NA	male	Pupa	NA	NA	NA	male	thorax		NA	NA	France	Negative	0	0	0	0	0	123	0
SRR15173393	111921467	33800283034	302	BS16-3-M2_CGGCTATG-CAGGACGT-AH3F5KDSXX_L003	WGS	size fractionation	GENOMIC	PAIRED	ILLUMINA	Illumina NovaSeq 6000	PRJNA311274	SAMN20257499	BS16-3-M2	BS16-3-M2	Hive	2014	France: Vaucluse	thorax	NA	NA	male	NA	NA	NA	NA	male	thorax		NA	NA	France	Negative	0	0	0	0	0	323	0
SRR15173361	97245427	29173628100	300	BS16-309-M1_GAATTCGT-TATAGCCT-BHCFFJDSXX_L003	WGS	size fractionation	GENOMIC	PAIRED	ILLUMINA	Illumina NovaSeq 6000	PRJNA311274	SAMN20257528	BS16-309-M1	BS16-309-M1	Hive	2014	France: Vaucluse	thorax	NA	NA	male	NA	NA	NA	NA	male	thorax		NA	NA	France	Negative	0	0	0	0	0	373	0
SRR15173408	54825387	16557266874	302	BS16-2-M4_CGGCTATG-AGGCGAAG-AH3F5KDSXX_L003	WGS	size fractionation	GENOMIC	PAIRED	ILLUMINA	Illumina NovaSeq 6000	PRJNA311274	SAMN20257485	BS16-2-M4	BS16-2-M4	Hive	2014	France: Vaucluse	thorax	NA	NA	male	NA	NA	NA	NA	male	thorax		NA	NA	France	Negative	0	0	0	0	0	229	0
SRR15173918	45579288	13406790400	294	OUE8_CCGTCC_merged	WGS	size fractionation	GENOMIC	PAIRED	ILLUMINA	Illumina HiSeq 2500	PRJNA311274	SAMN20257312	OUE8	OUE8	Hive	2014	France: Ouessant	thorax	NA	NA	male	NA	NA	NA	NA	male	thorax		NA	NA	France	Negative	0	0	0	0	0	0	0
SRR15173438	41856834	12640763868	302	BS16-1-M2_TAATGCGC-CAGGACGT-AH3F5KDSXX_L003	WGS	size fractionation	GENOMIC	PAIRED	ILLUMINA	Illumina NovaSeq 6000	PRJNA311274	SAMN20257459	BS16-1-M2	BS16-1-M2	Hive	2014	France: Vaucluse	thorax	NA	NA	male	NA	NA	NA	NA	male	thorax		NA	NA	France	Negative	0	0	0	0	0	176	88
SRR15173346	41512076	12453622800	300	BS16-314-M3_GAGATTCC-GGCTCTGA-BHCFFJDSXX_L004	WGS	size fractionation	GENOMIC	PAIRED	ILLUMINA	Illumina NovaSeq 6000	PRJNA311274	SAMN20257542	BS16-314-M3	BS16-314-M3	Hive	2014	France: Vaucluse	thorax	NA	NA	male	NA	NA	NA	NA	male	thorax		NA	NA	France	Negative	0	0	0	0	0	503	0
SRR15173391	40671861	12282902022	302	BS16-3-M4_TCCGCGAA-TATAGCCT-AH3F5KDSXX_L003	WGS	size fractionation	GENOMIC	PAIRED	ILLUMINA	Illumina NovaSeq 6000	PRJNA311274	SAMN20257501	BS16-3-M4	BS16-3-M4	Hive	2014	France: Vaucluse	thorax	NA	NA	male	NA	NA	NA	NA	male	thorax		NA	NA	France	Negative	0	0	0	0	0	211	0
SRR15173421	39269426	11780827800	300	BS16-196-M4_TCCGGAGA-GTACTGAC-BHCFFJDSXX_L003	WGS	size fractionation	GENOMIC	PAIRED	ILLUMINA	Illumina NovaSeq 6000	PRJNA311274	SAMN20257473	BS16-196-M4	BS16-196-M4	Hive	2014	France: Vaucluse	thorax	NA	NA	male	NA	NA	NA	NA	male	thorax		NA	NA	France	Negative	0	0	0	0	0	273	0
SRR15173861	39237120	11771136000	300	BS16-333-M4_TAATGCGC-CAGGACGT-BHCFFJDSXX_L004	WGS	size fractionation	GENOMIC	PAIRED	ILLUMINA	Illumina NovaSeq 6000	PRJNA311274	SAMN20257575	BS16-333-M4	BS16-333-M4	Hive	2014	France: Vaucluse	thorax	NA	NA	male	NA	NA	NA	NA	male	thorax		NA	NA	France	Negative	0	0	0	0	0	0	0
SRR15173832	38988691	11774584682	302	BS16-4-M4_TCCGCGAA-AGGCGAAG-AH3F5KDSXX_L003	WGS	size fractionation	GENOMIC	PAIRED	ILLUMINA	Illumina NovaSeq 6000	PRJNA311274	SAMN20257599	BS16-4-M4	BS16-4-M4	Hive	2014	France: Vaucluse	thorax	NA	NA	male	NA	NA	NA	NA	male	thorax		NA	NA	France	Negative	0	0	0	0	0	288	0
SRR15173862	38527035	11558110500	300	BS16-333-M3_TAATGCGC-TAATCTTA-BHCFFJDSXX_L004	WGS	size fractionation	GENOMIC	PAIRED	ILLUMINA	Illumina NovaSeq 6000	PRJNA311274	SAMN20257574	BS16-333-M3	BS16-333-M3	Hive	2014	France: Vaucluse	thorax	NA	NA	male	NA	NA	NA	NA	male	thorax		NA	NA	France	Negative	0	0	0	0	0	313	0
SRR15173821	38322698	11496809400	300	BS16-8-M2_ATTACTCG-ATAGAGGC-BHCFFJDSXX_L003	WGS	size fractionation	GENOMIC	PAIRED	ILLUMINA	Illumina NovaSeq 6000	PRJNA311274	SAMN20257609	BS16-8-M2	BS16-8-M2	Hive	2014	France: Vaucluse	thorax	NA	NA	male	NA	NA	NA	NA	male	thorax		NA	NA	France	Negative	0	0	0	0	0	233	0
SRR15173834	38175923	11529128746	302	BS16-4-M2_TCCGCGAA-CCTATCCT-AH3F5KDSXX_L003	WGS	size fractionation	GENOMIC	PAIRED	ILLUMINA	Illumina NovaSeq 6000	PRJNA311274	SAMN20257597	BS16-4-M2	BS16-4-M2	Hive	2014	France: Vaucluse	thorax	NA	NA	male	NA	NA	NA	NA	male	thorax		NA	NA	France	Negative	0	0	0	0	0	0	0
SRR15173383	37640414	11292124200	300	BS16-302-M3_ATTACTCG-GGCTCTGA-BHCFFJDSXX_L004	WGS	size fractionation	GENOMIC	PAIRED	ILLUMINA	Illumina NovaSeq 6000	PRJNA311274	SAMN20257508	BS16-302-M3	BS16-302-M3	Hive	2014	France: Vaucluse	thorax	NA	NA	male	NA	NA	NA	NA	male	thorax		NA	NA	France	Negative	0	0	0	0	0	166	0
SRR15173854	37564183	11269254900	300	BS16-334-M4_TCCGGAGA-TATAGCCT-BHCFFJDSXX_L004	WGS	size fractionation	GENOMIC	PAIRED	ILLUMINA	Illumina NovaSeq 6000	PRJNA311274	SAMN20257579	BS16-334-M4	BS16-334-M4	Hive	2014	France: Vaucluse	thorax	NA	NA	male	NA	NA	NA	NA	male	thorax		NA	NA	France	Negative	0	0	0	0	0	296	0
SRR15173844	37181981	11154594300	300	BS16-339-M1_CGGCTATG-TATAGCCT-BHCFFJDSXX_L003	WGS	size fractionation	GENOMIC	PAIRED	ILLUMINA	Illumina NovaSeq 6000	PRJNA311274	SAMN20257588	BS16-339-M1	BS16-339-M1	Hive	2014	France: Vaucluse	thorax	NA	NA	male	NA	NA	NA	NA	male	thorax		NA	NA	France	Negative	0	0	0	0	0	176	0
SRR15173833	36947583	11158170066	302	BS16-4-M3_TCCGCGAA-GGCTCTGA-AH3F5KDSXX_L003	WGS	size fractionation	GENOMIC	PAIRED	ILLUMINA	Illumina NovaSeq 6000	PRJNA311274	SAMN20257598	BS16-4-M3	BS16-4-M3	Hive	2014	France: Vaucluse	thorax	NA	NA	male	NA	NA	NA	NA	male	thorax		NA	NA	France	Negative	0	0	0	0	0	0	0
SRR15173863	36945720	11083716000	300	BS16-333-M2_TAATGCGC-AGGCGAAG-BHCFFJDSXX_L004	WGS	size fractionation	GENOMIC	PAIRED	ILLUMINA	Illumina NovaSeq 6000	PRJNA311274	SAMN20257573	BS16-333-M2	BS16-333-M2	Hive	2014	France: Vaucluse	thorax	NA	NA	male	NA	NA	NA	NA	male	thorax		NA	NA	France	Negative	0	0	0	0	0	313	0
SRR15173409	36743979	11096681658	302	BS16-2-M3_CGGCTATG-GGCTCTGA-AH3F5KDSXX_L003	WGS	size fractionation	GENOMIC	PAIRED	ILLUMINA	Illumina NovaSeq 6000	PRJNA311274	SAMN20257484	BS16-2-M3	BS16-2-M3	Hive	2014	France: Vaucluse	thorax	NA	NA	male	NA	NA	NA	NA	male	thorax		NA	NA	France	Negative	0	0	0	0	0	403	0
SRR13347742	35893225	10767967500	300	CLF-H	WGS	PCR	GENOMIC	PAIRED	ILLUMINA	HiSeq X Ten	PRJNA689474	SAMN17208784	CLF-H	NA	missing	2019-07	China: Zhejiang	thorax	NA	NA	male	NA	NA	NA	NA	male	thorax		NA	NA	China	Negative	0	0	0	0	0	0	0
SRR15173385	35811127	10743338100	300	BS16-302-M1_ATTACTCG-ATAGAGGC-BHCFFJDSXX_L004	WGS	size fractionation	GENOMIC	PAIRED	ILLUMINA	Illumina NovaSeq 6000	PRJNA311274	SAMN20257506	BS16-302-M1	BS16-302-M1	Hive	2014	France: Vaucluse	thorax	NA	NA	male	NA	NA	NA	NA	male	thorax		NA	NA	France	Negative	0	0	0	0	0	0	0
SRR15173412	35653522	10767363644	302	BS16-2-M1_CGGCTATG-ATAGAGGC-AH3F5KDSXX_L003	WGS	size fractionation	GENOMIC	PAIRED	ILLUMINA	Illumina NovaSeq 6000	PRJNA311274	SAMN20257482	BS16-2-M1	BS16-2-M1	Hive	2014	France: Vaucluse	thorax	NA	NA	male	NA	NA	NA	NA	male	thorax		NA	NA	France	Negative	0	0	0	0	0	239	0
SRR15173870	35616305	10684891500	300	BS16-332-M1_CGCTCATT-TAATCTTA-BHCFFJDSXX_L004	WGS	size fractionation	GENOMIC	PAIRED	ILLUMINA	Illumina NovaSeq 6000	PRJNA311274	SAMN20257568	BS16-332-M1	BS16-332-M1	Hive	2014	France: Vaucluse	thorax	NA	NA	male	NA	NA	NA	NA	male	thorax		NA	NA	France	Negative	0	0	0	0	0	175	0
SRR15173820	35380014	10614004200	300	BS16-8-M3_ATTACTCG-CCTATCCT-BHCFFJDSXX_L003	WGS	size fractionation	GENOMIC	PAIRED	ILLUMINA	Illumina NovaSeq 6000	PRJNA311274	SAMN20257610	BS16-8-M3	BS16-8-M3	Hive	2014	France: Vaucluse	thorax	NA	NA	male	NA	NA	NA	NA	male	thorax		NA	NA	France	Negative	0	0	0	0	0	206	0
SRR15173436	35213119	10634361938	302	BS16-1-M4_CGGCTATG-TATAGCCT-AH3F5KDSXX_L003	WGS	size fractionation	GENOMIC	PAIRED	ILLUMINA	Illumina NovaSeq 6000	PRJNA311274	SAMN20257461	BS16-1-M4	BS16-1-M4	Hive	2014	France: Vaucluse	thorax	NA	NA	male	NA	NA	NA	NA	male	thorax		NA	NA	France	Negative	0	0	0	0	0	85	51
SRR15173405	35167292	10550187600	300	BS16-20-M3_ATTACTCG-CAGGACGT-BHCFFJDSXX_L003	WGS	size fractionation	GENOMIC	PAIRED	ILLUMINA	Illumina NovaSeq 6000	PRJNA311274	SAMN20257488	BS16-20-M3	BS16-20-M3	Hive	2014	France: Vaucluse	thorax	NA	NA	male	NA	NA	NA	NA	male	thorax		NA	NA	France	Negative	0	0	0	0	0	308	0
SRR15173835	34905737	10541532574	302	BS16-4-M1_TCCGCGAA-ATAGAGGC-AH3F5KDSXX_L003	WGS	size fractionation	GENOMIC	PAIRED	ILLUMINA	Illumina NovaSeq 6000	PRJNA311274	SAMN20257596	BS16-4-M1	BS16-4-M1	Hive	2014	France: Vaucluse	thorax	NA	NA	male	NA	NA	NA	NA	male	thorax		NA	NA	France	Negative	0	0	0	0	0	0	0
SRR15173822	34731990	10419597000	300	BS16-8-M1_ATTACTCG-TATAGCCT-BHCFFJDSXX_L003	WGS	size fractionation	GENOMIC	PAIRED	ILLUMINA	Illumina NovaSeq 6000	PRJNA311274	SAMN20257608	BS16-8-M1	BS16-8-M1	Hive	2014	France: Vaucluse	thorax	NA	NA	male	NA	NA	NA	NA	male	thorax		NA	NA	France	Negative	0	0	0	0	0	171	0
SRR15173407	34441995	10332598500	300	BS16-20-M1_ATTACTCG-AGGCGAAG-BHCFFJDSXX_L003	WGS	size fractionation	GENOMIC	PAIRED	ILLUMINA	Illumina NovaSeq 6000	PRJNA311274	SAMN20257486	BS16-20-M1	BS16-20-M1	Hive	2014	France: Vaucluse	thorax	NA	NA	male	NA	NA	NA	NA	male	thorax		NA	NA	France	Negative	0	0	0	0	0	0	0
SRR15173339	34435723	10330716900	300	BS16-316-M1_TCCGGAGA-ATAGAGGC-BHCFFJDSXX_L004	WGS	size fractionation	GENOMIC	PAIRED	ILLUMINA	Illumina NovaSeq 6000	PRJNA311274	SAMN20257548	BS16-316-M1	BS16-316-M1	Hive	2014	France: Vaucluse	thorax	NA	NA	male	NA	NA	NA	NA	male	thorax		NA	NA	France	Negative	0	0	0	0	0	322	0
SRR15173841	34418224	10325467200	300	BS16-339-M4_CGGCTATG-GGCTCTGA-BHCFFJDSXX_L003	WGS	size fractionation	GENOMIC	PAIRED	ILLUMINA	Illumina NovaSeq 6000	PRJNA311274	SAMN20257591	BS16-339-M4	BS16-339-M4	Hive	2014	France: Vaucluse	thorax	NA	NA	male	NA	NA	NA	NA	male	thorax		NA	NA	France	Negative	0	0	0	0	0	195	0
SRR15173406	34357168	10307150400	300	BS16-20-M2_ATTACTCG-TAATCTTA-BHCFFJDSXX_L003	WGS	size fractionation	GENOMIC	PAIRED	ILLUMINA	Illumina NovaSeq 6000	PRJNA311274	SAMN20257487	BS16-20-M2	BS16-20-M2	Hive	2014	France: Vaucluse	thorax	NA	NA	male	NA	NA	NA	NA	male	thorax		NA	NA	France	Negative	0	0	0	0	0	170	0
SRR15173428	34355339	10306601700	300	BS16-194-M3_TCCGGAGA-CCTATCCT-BHCFFJDSXX_L003	WGS	size fractionation	GENOMIC	PAIRED	ILLUMINA	Illumina NovaSeq 6000	PRJNA311274	SAMN20257468	BS16-194-M3	BS16-194-M3	Hive	2014	France: Vaucluse	thorax	NA	NA	male	NA	NA	NA	NA	male	thorax		NA	NA	France	Negative	0	0	0	0	0	269	0
SRR15173880	34136006	10240801800	300	BRT2_CGGCTATG-AGGCGAAG-BHCFFJDSXX_L004	WGS	size fractionation	GENOMIC	PAIRED	ILLUMINA	Illumina NovaSeq 6000	PRJNA311274	SAMN20257064	BRT2	BRT2	Hive	2014	France: Brittany	thorax	NA	NA	male	NA	NA	NA	NA	male	thorax		NA	NA	France	Negative	0	0	0	0	0	0	0
SRR15173337	33961953	10188585900	300	BS16-316-M3_TCCGGAGA-GGCTCTGA-BHCFFJDSXX_L004	WGS	size fractionation	GENOMIC	PAIRED	ILLUMINA	Illumina NovaSeq 6000	PRJNA311274	SAMN20257550	BS16-316-M3	BS16-316-M3	Hive	2014	France: Vaucluse	thorax	NA	NA	male	NA	NA	NA	NA	male	thorax		NA	NA	France	Negative	0	0	0	0	0	356	0
SRR15173377	33680204	10104061200	300	BS16-303-M4_CTGAAGCT-AGGCGAAG-BHCFFJDSXX_L004	WGS	size fractionation	GENOMIC	PAIRED	ILLUMINA	Illumina NovaSeq 6000	PRJNA311274	SAMN20257513	BS16-303-M4	BS16-303-M4	Hive	2014	France: Vaucluse	thorax	NA	NA	male	NA	NA	NA	NA	male	thorax		NA	NA	France	Negative	0	0	0	0	0	168	0
SRR15173392	33635373	10157882646	302	BS16-3-M3_CGGCTATG-GTACTGAC-AH3F5KDSXX_L003	WGS	size fractionation	GENOMIC	PAIRED	ILLUMINA	Illumina NovaSeq 6000	PRJNA311274	SAMN20257500	BS16-3-M3	BS16-3-M3	Hive	2014	France: Vaucluse	thorax	NA	NA	male	NA	NA	NA	NA	male	thorax		NA	NA	France	Negative	0	0	0	0	0	392	0
SRR15173857	33621148	10086344400	300	BS16-334-M1_ATTACTCG-TAATCTTA-BHCFFJDSXX_L004	WGS	size fractionation	GENOMIC	PAIRED	ILLUMINA	Illumina NovaSeq 6000	PRJNA311274	SAMN20257576	BS16-334-M1	BS16-334-M1	Hive	2014	France: Vaucluse	thorax	NA	NA	male	NA	NA	NA	NA	male	thorax		NA	NA	France	Negative	0	0	0	0	0	0	0
SRR15173823	33570097	10138169294	302	BS16-6-M4_TCTCGCGC-TATAGCCT-AH3F5KDSXX_L003	WGS	size fractionation	GENOMIC	PAIRED	ILLUMINA	Illumina NovaSeq 6000	PRJNA311274	SAMN20257607	BS16-6-M4	BS16-6-M4	Hive	2014	France: Vaucluse	thorax	NA	NA	male	NA	NA	NA	NA	male	thorax		NA	NA	France	Negative	0	0	0	0	0	476	0
SRR15173878	33463792	10039137600	300	BRT3_CGGCTATG-TAATCTTA-BHCFFJDSXX_L004	WGS	size fractionation	GENOMIC	PAIRED	ILLUMINA	Illumina NovaSeq 6000	PRJNA311274	SAMN20257065	BRT3	BRT3	Hive	2014	France: Brittany	thorax	NA	NA	male	NA	NA	NA	NA	male	thorax		NA	NA	France	Negative	0	0	0	0	0	563	0
SRR15173866	33424465	10027339500	300	BS16-333-M1_TAATGCGC-GGCTCTGA-BHCFFJDSXX_L004	WGS	size fractionation	GENOMIC	PAIRED	ILLUMINA	Illumina NovaSeq 6000	PRJNA311274	SAMN20257572	BS16-333-M1	BS16-333-M1	Hive	2014	France: Vaucluse	thorax	NA	NA	male	NA	NA	NA	NA	male	thorax		NA	NA	France	Negative	0	0	0	0	0	253	0
SRR15173360	33370185	10011055500	300	BS16-309-M2_CGGCTATG-CAGGACGT-BHCFFJDSXX_L004	WGS	size fractionation	GENOMIC	PAIRED	ILLUMINA	Illumina NovaSeq 6000	PRJNA311274	SAMN20257529	BS16-309-M2	BS16-309-M2	Hive	2014	France: Vaucluse	thorax	NA	NA	male	NA	NA	NA	NA	male	thorax		NA	NA	France	Negative	0	0	0	0	0	183	0
SRR15173355	33140874	9942262200	300	BS16-310-M2_GAATTCGT-CCTATCCT-BHCFFJDSXX_L004	WGS	size fractionation	GENOMIC	PAIRED	ILLUMINA	Illumina NovaSeq 6000	PRJNA311274	SAMN20257533	BS16-310-M2	BS16-310-M2	Hive	2014	France: Vaucluse	thorax	NA	NA	male	NA	NA	NA	NA	male	thorax		NA	NA	France	Negative	0	0	0	0	0	185	0
SRR15173427	32944377	9883313100	300	BS16-194-M4_TCCGGAGA-GGCTCTGA-BHCFFJDSXX_L003	WGS	size fractionation	GENOMIC	PAIRED	ILLUMINA	Illumina NovaSeq 6000	PRJNA311274	SAMN20257469	BS16-194-M4	BS16-194-M4	Hive	2014	France: Vaucluse	thorax	NA	NA	male	NA	NA	NA	NA	male	thorax		NA	NA	France	Negative	0	0	0	0	0	213	0
SRR15173606	32935817	9251883600	280	JSC12_CGTACG_merged	WGS	size fractionation	GENOMIC	PAIRED	ILLUMINA	Illumina HiSeq 2500	PRJNA311274	SAMN20257257	JSC12	JSC12	Hive	2014	France: Hautes Pyrenees	thorax	NA	NA	male	NA	NA	NA	NA	male	thorax		NA	NA	France	Negative	0	0	0	0	0	187	0
SRR15173328	32884071	9865221300	300	BS16-319-M3_TCCGGAGA-GTACTGAC-BHCFFJDSXX_L004	WGS	size fractionation	GENOMIC	PAIRED	ILLUMINA	Illumina NovaSeq 6000	PRJNA311274	SAMN20257558	BS16-319-M3	BS16-319-M3	Hive	2014	France: Vaucluse	thorax	NA	NA	male	NA	NA	NA	NA	male	thorax		NA	NA	France	Negative	0	0	0	0	0	0	0
SRR15173338	32880308	9864092400	300	BS16-316-M2_TCCGGAGA-CCTATCCT-BHCFFJDSXX_L004	WGS	size fractionation	GENOMIC	PAIRED	ILLUMINA	Illumina NovaSeq 6000	PRJNA311274	SAMN20257549	BS16-316-M2	BS16-316-M2	Hive	2014	France: Vaucluse	thorax	NA	NA	male	NA	NA	NA	NA	male	thorax		NA	NA	France	Negative	0	0	0	0	0	364	0
SRR15173340	32707909	9812372700	300	BS16-315-M4_CGCTCATT-AGGCGAAG-BHCFFJDSXX_L004	WGS	size fractionation	GENOMIC	PAIRED	ILLUMINA	Illumina NovaSeq 6000	PRJNA311274	SAMN20257547	BS16-315-M4	BS16-315-M4	Hive	2014	France: Vaucluse	thorax	NA	NA	male	NA	NA	NA	NA	male	thorax		NA	NA	France	Negative	0	0	0	0	0	344	0
SRR15173380	32699527	9809858100	300	BS16-303-M2_CTGAAGCT-CCTATCCT-BHCFFJDSXX_L004	WGS	size fractionation	GENOMIC	PAIRED	ILLUMINA	Illumina NovaSeq 6000	PRJNA311274	SAMN20257511	BS16-303-M2	BS16-303-M2	Hive	2014	France: Vaucluse	thorax	NA	NA	male	NA	NA	NA	NA	male	thorax		NA	NA	France	Negative	0	0	0	0	0	165	0
SRR15173333	32675275	9802582500	300	BS16-317-M2_CTGAAGCT-ATAGAGGC-BHCFFJDSXX_L003	WGS	size fractionation	GENOMIC	PAIRED	ILLUMINA	Illumina NovaSeq 6000	PRJNA311274	SAMN20257553	BS16-317-M2	BS16-317-M2	Hive	2014	France: Vaucluse	thorax	NA	NA	male	NA	NA	NA	NA	male	thorax		NA	NA	France	Negative	0	0	0	0	0	123	0
SRR15173830	32375330	9712599000	300	BS16-488-M2_CGGCTATG-TATAGCCT-BHCFFJDSXX_L004	WGS	size fractionation	GENOMIC	PAIRED	ILLUMINA	Illumina NovaSeq 6000	PRJNA311274	SAMN20257601	BS16-488-M2	BS16-488-M2	Hive	2014	France: Vaucluse	thorax	NA	NA	male	NA	NA	NA	NA	male	thorax		NA	NA	France	Negative	0	0	0	0	0	294	0
SRR15173881	32310640	9693192000	300	BRT1_CGGCTATG-GGCTCTGA-BHCFFJDSXX_L004	WGS	size fractionation	GENOMIC	PAIRED	ILLUMINA	Illumina NovaSeq 6000	PRJNA311274	SAMN20257063	BRT1	BRT1	Hive	2014	France: Brittany	thorax	NA	NA	male	NA	NA	NA	NA	male	thorax		NA	NA	France	Negative	0	0	0	0	0	239	0
SRR15173410	32305256	9756187312	302	BS16-2-M2_CGGCTATG-CCTATCCT-AH3F5KDSXX_L003	WGS	size fractionation	GENOMIC	PAIRED	ILLUMINA	Illumina NovaSeq 6000	PRJNA311274	SAMN20257483	BS16-2-M2	BS16-2-M2	Hive	2014	France: Vaucluse	thorax	NA	NA	male	NA	NA	NA	NA	male	thorax		NA	NA	France	Negative	0	0	0	0	0	384	0
SRR15173824	32149266	9709078332	302	BS16-6-M3_TCCGCGAA-GTACTGAC-AH3F5KDSXX_L003	WGS	size fractionation	GENOMIC	PAIRED	ILLUMINA	Illumina NovaSeq 6000	PRJNA311274	SAMN20257606	BS16-6-M3	BS16-6-M3	Hive	2014	France: Vaucluse	thorax	NA	NA	male	NA	NA	NA	NA	male	thorax		NA	NA	France	Negative	0	0	0	0	0	0	0
SRR15173396	32135976	9640792800	300	BS16-220-M3_CGGCTATG-CAGGACGT-BHCFFJDSXX_L003	WGS	size fractionation	GENOMIC	PAIRED	ILLUMINA	Illumina NovaSeq 6000	PRJNA311274	SAMN20257496	BS16-220-M3	BS16-220-M3	Hive	2014	France: Vaucluse	thorax	NA	NA	male	NA	NA	NA	NA	male	thorax		NA	NA	France	Negative	0	0	0	0	0	242	0
SRR15173372	32032843	9609852900	300	BS16-306-M1_TAATGCGC-ATAGAGGC-BHCFFJDSXX_L004	WGS	size fractionation	GENOMIC	PAIRED	ILLUMINA	Illumina NovaSeq 6000	PRJNA311274	SAMN20257518	BS16-306-M1	BS16-306-M1	Hive	2014	France: Vaucluse	thorax	NA	NA	male	NA	NA	NA	NA	male	thorax		NA	NA	France	Negative	0	0	0	0	0	167	0
SRR15173419	31987012	9596103600	300	BS16-197-M2_CGCTCATT-ATAGAGGC-BHCFFJDSXX_L003	WGS	size fractionation	GENOMIC	PAIRED	ILLUMINA	Illumina NovaSeq 6000	PRJNA311274	SAMN20257475	BS16-197-M2	BS16-197-M2	Hive	2014	France: Vaucluse	thorax	NA	NA	male	NA	NA	NA	NA	male	thorax		NA	NA	France	Negative	0	0	0	0	0	274	0
SRR6347829	31855370	6371074000	200	WHAIPI005599-64	WGS	size fractionation	GENOMIC	PAIRED	ILLUMINA	Illumina HiSeq 2000	PRJNA381313	SAMN08132896	115MEX_WHAIPI005599-64_AHB	NA	NA	2013	Mexico	thorax	NA	NA	male	NA	NA	NA	NA	male	thorax		NA	NA	Mexico	Negative	0	0	0	0	0	0	0
SRR15173317	31803016	9540904800	300	BS16-329-M4_CTGAAGCT-GTACTGAC-BHCFFJDSXX_L003	WGS	size fractionation	GENOMIC	PAIRED	ILLUMINA	Illumina NovaSeq 6000	PRJNA311274	SAMN20257567	BS16-329-M4	BS16-329-M4	Hive	2014	France: Vaucluse	thorax	NA	NA	male	NA	NA	NA	NA	male	thorax		NA	NA	France	Negative	0	0	0	0	0	121	0
SRR15173926	31717457	6343491400	200	OUE3_GGCTAC_L008	WGS	size fractionation	GENOMIC	PAIRED	ILLUMINA	Illumina HiSeq 2500	PRJNA311274	SAMN20257304	OUE3	OUE3	Hive	2014	France: Ouessant	thorax	NA	NA	male	NA	NA	NA	NA	male	thorax		NA	NA	France	Negative	0	0	0	0	0	203	0
SRR15173843	31676215	9502864500	300	BS16-339-M2_CGGCTATG-ATAGAGGC-BHCFFJDSXX_L003	WGS	size fractionation	GENOMIC	PAIRED	ILLUMINA	Illumina NovaSeq 6000	PRJNA311274	SAMN20257589	BS16-339-M2	BS16-339-M2	Hive	2014	France: Vaucluse	thorax	NA	NA	male	NA	NA	NA	NA	male	thorax		NA	NA	France	Negative	0	0	0	0	0	300	0
SRR15173430	31623532	9487059600	300	BS16-194-M1_TCCGGAGA-TATAGCCT-BHCFFJDSXX_L003	WGS	size fractionation	GENOMIC	PAIRED	ILLUMINA	Illumina NovaSeq 6000	PRJNA311274	SAMN20257466	BS16-194-M1	BS16-194-M1	Hive	2014	France: Vaucluse	thorax	NA	NA	male	NA	NA	NA	NA	male	thorax		NA	NA	France	Negative	0	0	0	0	0	0	0
SRR15173394	31517335	9518235170	302	BS16-3-M1_CGGCTATG-TAATCTTA-AH3F5KDSXX_L003	WGS	size fractionation	GENOMIC	PAIRED	ILLUMINA	Illumina NovaSeq 6000	PRJNA311274	SAMN20257498	BS16-3-M1	BS16-3-M1	Hive	2014	France: Vaucluse	thorax	NA	NA	male	NA	NA	NA	NA	male	thorax		NA	NA	France	Negative	0	0	0	0	0	249	0
SRR15173354	31476890	9443067000	300	BS16-310-M3_GAATTCGT-GGCTCTGA-BHCFFJDSXX_L004	WGS	size fractionation	GENOMIC	PAIRED	ILLUMINA	Illumina NovaSeq 6000	PRJNA311274	SAMN20257534	BS16-310-M3	BS16-310-M3	Hive	2014	France: Vaucluse	thorax	NA	NA	male	NA	NA	NA	NA	male	thorax		NA	NA	France	Negative	0	0	0	0	0	250	0
SRR15173856	31394189	9418256700	300	BS16-334-M2_ATTACTCG-CAGGACGT-BHCFFJDSXX_L004	WGS	size fractionation	GENOMIC	PAIRED	ILLUMINA	Illumina NovaSeq 6000	PRJNA311274	SAMN20257577	BS16-334-M2	BS16-334-M2	Hive	2014	France: Vaucluse	thorax	NA	NA	male	NA	NA	NA	NA	male	thorax		NA	NA	France	Negative	0	0	0	0	0	363	0
SRR15173831	31125176	9337552800	300	BS16-488-M1_TAATGCGC-GTACTGAC-BHCFFJDSXX_L004	WGS	size fractionation	GENOMIC	PAIRED	ILLUMINA	Illumina NovaSeq 6000	PRJNA311274	SAMN20257600	BS16-488-M1	BS16-488-M1	Hive	2014	France: Vaucluse	thorax	NA	NA	male	NA	NA	NA	NA	male	thorax		NA	NA	France	Negative	0	0	0	0	0	0	0
SRR15173416	31058144	9317443200	300	BS16-198-M1_CGCTCATT-AGGCGAAG-BHCFFJDSXX_L003	WGS	size fractionation	GENOMIC	PAIRED	ILLUMINA	Illumina NovaSeq 6000	PRJNA311274	SAMN20257478	BS16-198-M1	BS16-198-M1	Hive	2014	France: Vaucluse	thorax	NA	NA	male	NA	NA	NA	NA	male	thorax		NA	NA	France	Negative	0	0	0	0	0	260	0
SRR15173953	30954497	9286349100	300	KF16_CCGTCC_L001	WGS	size fractionation	GENOMIC	PAIRED	ILLUMINA	Illumina HiSeq 2500	PRJNA311274	SAMN20257280	KF16	KF16	Hive	2014	France: Tarn	thorax	NA	NA	male	NA	NA	NA	NA	male	thorax		NA	NA	France	Negative	0	0	0	0	0	343	0
SRR15173395	30915493	9274647900	300	BS16-220-M4_ATTACTCG-TATAGCCT-BHCFFJDSXX_L004	WGS	size fractionation	GENOMIC	PAIRED	ILLUMINA	Illumina NovaSeq 6000	PRJNA311274	SAMN20257497	BS16-220-M4	BS16-220-M4	Hive	2014	France: Vaucluse	thorax	NA	NA	male	NA	NA	NA	NA	male	thorax		NA	NA	France	Negative	0	0	0	0	0	322	0
SRR15173827	30813227	9243968100	300	BS16-488-M4_CGGCTATG-CCTATCCT-BHCFFJDSXX_L004	WGS	size fractionation	GENOMIC	PAIRED	ILLUMINA	Illumina NovaSeq 6000	PRJNA311274	SAMN20257603	BS16-488-M4	BS16-488-M4	Hive	2014	France: Vaucluse	thorax	NA	NA	male	NA	NA	NA	NA	male	thorax		NA	NA	France	Negative	0	0	0	0	0	0	0
SRR15173381	30808131	9242439300	300	BS16-303-M1_CTGAAGCT-ATAGAGGC-BHCFFJDSXX_L004	WGS	size fractionation	GENOMIC	PAIRED	ILLUMINA	Illumina NovaSeq 6000	PRJNA311274	SAMN20257510	BS16-303-M1	BS16-303-M1	Hive	2014	France: Vaucluse	thorax	NA	NA	male	NA	NA	NA	NA	male	thorax		NA	NA	France	Negative	0	0	0	0	0	164	0
SRR15173549	30801970	8668063900	281	Sar33_ATGTCA_merged	WGS	size fractionation	GENOMIC	PAIRED	ILLUMINA	Illumina HiSeq 2500	PRJNA311274	SAMN20257359	Sar33	Sar33	Hive	2014	France: Sarthe	thorax	NA	NA	male	NA	NA	NA	NA	male	thorax		NA	NA	France	Negative	0	0	0	0	0	235	0
SRR15173357	30745538	9223661400	300	BS16-310-M1_GAATTCGT-ATAGAGGC-BHCFFJDSXX_L004	WGS	size fractionation	GENOMIC	PAIRED	ILLUMINA	Illumina NovaSeq 6000	PRJNA311274	SAMN20257532	BS16-310-M1	BS16-310-M1	Hive	2014	France: Vaucluse	thorax	NA	NA	male	NA	NA	NA	NA	male	thorax		NA	NA	France	Negative	0	0	0	0	0	259	0
SRR15173379	30707694	9212308200	300	BS16-303-M3_CTGAAGCT-GGCTCTGA-BHCFFJDSXX_L004	WGS	size fractionation	GENOMIC	PAIRED	ILLUMINA	Illumina NovaSeq 6000	PRJNA311274	SAMN20257512	BS16-303-M3	BS16-303-M3	Hive	2014	France: Vaucluse	thorax	NA	NA	male	NA	NA	NA	NA	male	thorax		NA	NA	France	Negative	0	0	0	0	0	130	0
SRR15173847	30557205	9167161500	300	BS16-338-M2_TAATGCGC-TAATCTTA-BHCFFJDSXX_L003	WGS	size fractionation	GENOMIC	PAIRED	ILLUMINA	Illumina NovaSeq 6000	PRJNA311274	SAMN20257585	BS16-338-M2	BS16-338-M2	Hive	2014	France: Vaucluse	thorax	NA	NA	male	NA	NA	NA	NA	male	thorax		NA	NA	France	Negative	0	0	0	0	0	0	0
SRR15173398	30531748	9159524400	300	BS16-220-M1_CGGCTATG-AGGCGAAG-BHCFFJDSXX_L003	WGS	size fractionation	GENOMIC	PAIRED	ILLUMINA	Illumina NovaSeq 6000	PRJNA311274	SAMN20257494	BS16-220-M1	BS16-220-M1	Hive	2014	France: Vaucluse	thorax	NA	NA	male	NA	NA	NA	NA	male	thorax		NA	NA	France	Negative	0	0	0	0	0	213	0
SRR15173342	30520353	9156105900	300	BS16-315-M2_CGCTCATT-CCTATCCT-BHCFFJDSXX_L004	WGS	size fractionation	GENOMIC	PAIRED	ILLUMINA	Illumina NovaSeq 6000	PRJNA311274	SAMN20257545	BS16-315-M2	BS16-315-M2	Hive	2014	France: Vaucluse	thorax	NA	NA	male	NA	NA	NA	NA	male	thorax		NA	NA	France	Negative	0	0	0	0	0	151	0
SRR15173855	30454973	9136491900	300	BS16-334-M3_ATTACTCG-GTACTGAC-BHCFFJDSXX_L004	WGS	size fractionation	GENOMIC	PAIRED	ILLUMINA	Illumina NovaSeq 6000	PRJNA311274	SAMN20257578	BS16-334-M3	BS16-334-M3	Hive	2014	France: Vaucluse	thorax	NA	NA	male	NA	NA	NA	NA	male	thorax		NA	NA	France	Negative	0	0	0	0	0	123	0
SRR15173344	30147664	9044299200	300	BS16-314-M4_GAGATTCC-AGGCGAAG-BHCFFJDSXX_L004	WGS	size fractionation	GENOMIC	PAIRED	ILLUMINA	Illumina NovaSeq 6000	PRJNA311274	SAMN20257543	BS16-314-M4	BS16-314-M4	Hive	2014	France: Vaucluse	thorax	NA	NA	male	NA	NA	NA	NA	male	thorax		NA	NA	France	Negative	0	0	0	0	0	287	0
SRR15173336	30054905	9016471500	300	BS16-316-M4_TCCGGAGA-AGGCGAAG-BHCFFJDSXX_L004	WGS	size fractionation	GENOMIC	PAIRED	ILLUMINA	Illumina NovaSeq 6000	PRJNA311274	SAMN20257551	BS16-316-M4	BS16-316-M4	Hive	2014	France: Vaucluse	thorax	NA	NA	male	NA	NA	NA	NA	male	thorax		NA	NA	France	Negative	0	0	0	0	0	0	0
SRR15173365	29970779	8991233700	300	BS16-308-M1_ATTCAGAA-AGGCGAAG-BHCFFJDSXX_L003	WGS	size fractionation	GENOMIC	PAIRED	ILLUMINA	Illumina NovaSeq 6000	PRJNA311274	SAMN20257524	BS16-308-M1	BS16-308-M1	Hive	2014	France: Vaucluse	thorax	NA	NA	male	NA	NA	NA	NA	male	thorax		NA	NA	France	Negative	0	0	0	0	0	234	0
SRR15173364	29893515	8968054500	300	BS16-308-M2_ATTCAGAA-TAATCTTA-BHCFFJDSXX_L003	WGS	size fractionation	GENOMIC	PAIRED	ILLUMINA	Illumina NovaSeq 6000	PRJNA311274	SAMN20257525	BS16-308-M2	BS16-308-M2	Hive	2014	France: Vaucluse	thorax	NA	NA	male	NA	NA	NA	NA	male	thorax		NA	NA	France	Negative	0	0	0	0	0	324	0
SRR15173370	29864562	8959368600	300	BS16-307-M1_ATTCAGAA-TATAGCCT-BHCFFJDSXX_L003	WGS	size fractionation	GENOMIC	PAIRED	ILLUMINA	Illumina NovaSeq 6000	PRJNA311274	SAMN20257520	BS16-307-M1	BS16-307-M1	Hive	2014	France: Vaucluse	thorax	NA	NA	male	NA	NA	NA	NA	male	thorax		NA	NA	France	Negative	0	0	0	0	0	250	0
SRR15173414	29856614	8956984200	300	BS16-198-M3_CGCTCATT-CAGGACGT-BHCFFJDSXX_L003	WGS	size fractionation	GENOMIC	PAIRED	ILLUMINA	Illumina NovaSeq 6000	PRJNA311274	SAMN20257480	BS16-198-M3	BS16-198-M3	Hive	2014	France: Vaucluse	thorax	NA	NA	male	NA	NA	NA	NA	male	thorax		NA	NA	France	Negative	0	0	0	0	0	295	0
SRR15173384	29840641	8952192300	300	BS16-302-M2_ATTACTCG-CCTATCCT-BHCFFJDSXX_L004	WGS	size fractionation	GENOMIC	PAIRED	ILLUMINA	Illumina NovaSeq 6000	PRJNA311274	SAMN20257507	BS16-302-M2	BS16-302-M2	Hive	2014	France: Vaucluse	thorax	NA	NA	male	NA	NA	NA	NA	male	thorax		NA	NA	France	Negative	0	0	0	0	0	0	0
SRR15173382	29602131	8880639300	300	BS16-302-M4_ATTACTCG-AGGCGAAG-BHCFFJDSXX_L004	WGS	size fractionation	GENOMIC	PAIRED	ILLUMINA	Illumina NovaSeq 6000	PRJNA311274	SAMN20257509	BS16-302-M4	BS16-302-M4	Hive	2014	France: Vaucluse	thorax	NA	NA	male	NA	NA	NA	NA	male	thorax		NA	NA	France	Negative	0	0	0	0	0	288	0
SRR6347830	29476699	5895339800	200	WHAIPI005600-66	WGS	size fractionation	GENOMIC	PAIRED	ILLUMINA	Illumina HiSeq 2000	PRJNA381313	SAMN08132895	110MEX_WHAIPI005600-66_AHB	NA	NA	2013	Mexico	thorax	NA	NA	male	NA	NA	NA	NA	male	thorax		NA	NA	Mexico	Negative	0	0	0	0	0	247	0
SRR15173341	28977019	8693105700	300	BS16-315-M3_CGCTCATT-GGCTCTGA-BHCFFJDSXX_L004	WGS	size fractionation	GENOMIC	PAIRED	ILLUMINA	Illumina NovaSeq 6000	PRJNA311274	SAMN20257546	BS16-315-M3	BS16-315-M3	Hive	2014	France: Vaucluse	thorax	NA	NA	male	NA	NA	NA	NA	male	thorax		NA	NA	France	Negative	0	0	0	0	0	0	0
SRR15173371	28912683	8673804900	300	BS16-306-M2_TAATGCGC-CCTATCCT-BHCFFJDSXX_L004	WGS	size fractionation	GENOMIC	PAIRED	ILLUMINA	Illumina NovaSeq 6000	PRJNA311274	SAMN20257519	BS16-306-M2	BS16-306-M2	Hive	2014	France: Vaucluse	thorax	NA	NA	male	NA	NA	NA	NA	male	thorax		NA	NA	France	Negative	0	0	0	0	0	101	0
SRR15173829	28886653	8665995900	300	BS16-488-M3_CGGCTATG-ATAGAGGC-BHCFFJDSXX_L004	WGS	size fractionation	GENOMIC	PAIRED	ILLUMINA	Illumina NovaSeq 6000	PRJNA311274	SAMN20257602	BS16-488-M3	BS16-488-M3	Hive	2014	France: Vaucluse	thorax	NA	NA	male	NA	NA	NA	NA	male	thorax		NA	NA	France	Negative	0	0	0	0	0	331	0
SRR15173417	28860029	8658008700	300	BS16-197-M4_CGCTCATT-GGCTCTGA-BHCFFJDSXX_L003	WGS	size fractionation	GENOMIC	PAIRED	ILLUMINA	Illumina NovaSeq 6000	PRJNA311274	SAMN20257477	BS16-197-M4	BS16-197-M4	Hive	2014	France: Vaucluse	thorax	NA	NA	male	NA	NA	NA	NA	male	thorax		NA	NA	France	Negative	0	0	0	0	0	177	0
SRR15173325	28765192	8629557600	300	BS16-325-M2_ATTCAGAA-CCTATCCT-BHCFFJDSXX_L004	WGS	size fractionation	GENOMIC	PAIRED	ILLUMINA	Illumina NovaSeq 6000	PRJNA311274	SAMN20257561	BS16-325-M2	BS16-325-M2	Hive	2014	France: Vaucluse	thorax	NA	NA	male	NA	NA	NA	NA	male	thorax		NA	NA	France	Negative	0	0	0	0	0	0	0
SRR15173853	28754024	8626207200	300	BS16-337-M1_TAATGCGC-TATAGCCT-BHCFFJDSXX_L003	WGS	size fractionation	GENOMIC	PAIRED	ILLUMINA	Illumina NovaSeq 6000	PRJNA311274	SAMN20257580	BS16-337-M1	BS16-337-M1	Hive	2014	France: Vaucluse	thorax	NA	NA	male	NA	NA	NA	NA	male	thorax		NA	NA	France	Negative	0	0	0	0	0	285	0
SRR15173433	28542423	8562726900	300	BS16-19-M2_GAATTCGT-CAGGACGT-BHCFFJDSXX_L004	WGS	size fractionation	GENOMIC	PAIRED	ILLUMINA	Illumina NovaSeq 6000	PRJNA311274	SAMN20257463	BS16-19-M2	BS16-19-M2	Hive	2014	France: Vaucluse	thorax	NA	NA	male	NA	NA	NA	NA	male	thorax		NA	NA	France	Negative	0	0	0	0	0	144	0
SRR15173404	28536294	8560888200	300	BS16-20-M4_ATTACTCG-GTACTGAC-BHCFFJDSXX_L003	WGS	size fractionation	GENOMIC	PAIRED	ILLUMINA	Illumina NovaSeq 6000	PRJNA311274	SAMN20257489	BS16-20-M4	BS16-20-M4	Hive	2014	France: Vaucluse	thorax	NA	NA	male	NA	NA	NA	NA	male	thorax		NA	NA	France	Negative	0	0	0	0	0	144	88
SRR15173369	28448863	8534658900	300	BS16-307-M2_ATTCAGAA-ATAGAGGC-BHCFFJDSXX_L003	WGS	size fractionation	GENOMIC	PAIRED	ILLUMINA	Illumina NovaSeq 6000	PRJNA311274	SAMN20257521	BS16-307-M2	BS16-307-M2	Hive	2014	France: Vaucluse	thorax	NA	NA	male	NA	NA	NA	NA	male	thorax		NA	NA	France	Negative	0	0	0	0	0	0	0
SRR15173838	28325289	8497586700	300	BS16-341-M2_GAGATTCC-CAGGACGT-BHCFFJDSXX_L004	WGS	size fractionation	GENOMIC	PAIRED	ILLUMINA	Illumina NovaSeq 6000	PRJNA311274	SAMN20257593	BS16-341-M2	BS16-341-M2	Hive	2014	France: Vaucluse	thorax	NA	NA	male	NA	NA	NA	NA	male	thorax		NA	NA	France	Negative	0	0	0	0	0	364	0
SRR15173845	28267443	8480232900	300	BS16-338-M4_TAATGCGC-GTACTGAC-BHCFFJDSXX_L003	WGS	size fractionation	GENOMIC	PAIRED	ILLUMINA	Illumina NovaSeq 6000	PRJNA311274	SAMN20257587	BS16-338-M4	BS16-338-M4	Hive	2014	France: Vaucluse	thorax	NA	NA	male	NA	NA	NA	NA	male	thorax		NA	NA	France	Negative	0	0	0	0	0	380	0
SRR15173869	28205973	8461791900	300	BS16-332-M2_CGCTCATT-CAGGACGT-BHCFFJDSXX_L004	WGS	size fractionation	GENOMIC	PAIRED	ILLUMINA	Illumina NovaSeq 6000	PRJNA311274	SAMN20257569	BS16-332-M2	BS16-332-M2	Hive	2014	France: Vaucluse	thorax	NA	NA	male	NA	NA	NA	NA	male	thorax		NA	NA	France	Negative	0	0	0	0	0	288	0
SRR15173426	28193944	8458183200	300	BS16-196-M1_TCCGGAGA-AGGCGAAG-BHCFFJDSXX_L003	WGS	size fractionation	GENOMIC	PAIRED	ILLUMINA	Illumina NovaSeq 6000	PRJNA311274	SAMN20257470	BS16-196-M1	BS16-196-M1	Hive	2014	France: Vaucluse	thorax	NA	NA	male	NA	NA	NA	NA	male	thorax		NA	NA	France	Negative	0	0	0	0	0	0	0
SRR15173860	28170506	8451151800	300	Ab-PacBio_TCCGCGAA-CCTATCCT-BHCFFJDSXX_L004	WGS	size fractionation	GENOMIC	PAIRED	ILLUMINA	Illumina NovaSeq 6000	PRJNA311274	SAMN20256973	Ab-PacBio	Ab-PacBio	Hive	2014	France: Ouessant	thorax	NA	NA	male	NA	NA	NA	NA	male	thorax		NA	NA	France	Negative	0	0	0	0	0	274	0
SRR15173437	28056904	8473185008	302	BS16-1-M3_TAATGCGC-GTACTGAC-AH3F5KDSXX_L003	WGS	size fractionation	GENOMIC	PAIRED	ILLUMINA	Illumina NovaSeq 6000	PRJNA311274	SAMN20257460	BS16-1-M3	BS16-1-M3	Hive	2014	France: Vaucluse	thorax	NA	NA	male	NA	NA	NA	NA	male	thorax		NA	NA	France	Negative	0	0	0	0	0	185	90
SRR15173818	27968473	8390541900	300	BS16-9-M1_ATTCAGAA-TAATCTTA-BHCFFJDSXX_L004	WGS	size fractionation	GENOMIC	PAIRED	ILLUMINA	Illumina NovaSeq 6000	PRJNA311274	SAMN20257612	BS16-9-M1	BS16-9-M1	Hive	2014	France: Vaucluse	thorax	NA	NA	male	NA	NA	NA	NA	male	thorax		NA	NA	France	Negative	0	0	0	0	0	266	0
SRR15173583	27941745	8382523500	300	POL30_ATTCCT_L005	WGS	size fractionation	GENOMIC	PAIRED	ILLUMINA	Illumina HiSeq 2500	PRJNA311274	SAMN20257328	POL30	POL30	Hive	2014	Poland	thorax	NA	NA	male	NA	NA	NA	NA	male	thorax		NA	NA	Poland	Negative	0	0	0	0	0	156	0
SRR15173387	27906782	8372034600	300	BS16-301-M3_GAGATTCC-CCTATCCT-BHCFFJDSXX_L003	WGS	size fractionation	GENOMIC	PAIRED	ILLUMINA	Illumina NovaSeq 6000	PRJNA311274	SAMN20257504	BS16-301-M3	BS16-301-M3	Hive	2014	France: Vaucluse	thorax	NA	NA	male	NA	NA	NA	NA	male	thorax		NA	NA	France	Negative	0	0	0	0	0	0	0
SRR15173852	27894828	8368448400	300	BS16-337-M2_CGGCTATG-GTACTGAC-BHCFFJDSXX_L004	WGS	size fractionation	GENOMIC	PAIRED	ILLUMINA	Illumina NovaSeq 6000	PRJNA311274	SAMN20257581	BS16-337-M2	BS16-337-M2	Hive	2014	France: Vaucluse	thorax	NA	NA	male	NA	NA	NA	NA	male	thorax		NA	NA	France	Negative	0	0	0	0	0	145	0
SRR6347832	27759408	5551881600	200	WHAIPI005633-80	WGS	size fractionation	GENOMIC	PAIRED	ILLUMINA	Illumina HiSeq 2000	PRJNA381313	SAMN08132897	11PR_WHAIPI005633-80_gAHB	NA	NA	2013	Puerto Rico	thorax	NA	NA	male	NA	NA	NA	NA	male	thorax		NA	NA	USA	Negative	0	0	0	0	0	131	80
SRR15173527	27724052	8317215600	300	TES19_ACTGAT_L005	WGS	size fractionation	GENOMIC	PAIRED	ILLUMINA	Illumina HiSeq 2500	PRJNA311274	SAMN20257378	TES19	TES19	Hive	2014	France: Corsica	thorax	NA	NA	male	NA	NA	NA	NA	male	thorax		NA	NA	France	Negative	0	0	0	0	0	122	0
SRR15173349	27648357	8294507100	300	BS16-312-M4_GAATTCGT-GTACTGAC-BHCFFJDSXX_L003	WGS	size fractionation	GENOMIC	PAIRED	ILLUMINA	Illumina NovaSeq 6000	PRJNA311274	SAMN20257539	BS16-312-M4	BS16-312-M4	Hive	2014	France: Vaucluse	thorax	NA	NA	male	NA	NA	NA	NA	male	thorax		NA	NA	France	Negative	0	0	0	0	0	237	0
SRR15173353	27577363	8273208900	300	BS16-310-M4_GAATTCGT-AGGCGAAG-BHCFFJDSXX_L004	WGS	size fractionation	GENOMIC	PAIRED	ILLUMINA	Illumina NovaSeq 6000	PRJNA311274	SAMN20257535	BS16-310-M4	BS16-310-M4	Hive	2014	France: Vaucluse	thorax	NA	NA	male	NA	NA	NA	NA	male	thorax		NA	NA	France	Negative	0	0	0	0	0	0	0
SRR15173397	27572593	8271777900	300	BS16-220-M2_CGGCTATG-TAATCTTA-BHCFFJDSXX_L003	WGS	size fractionation	GENOMIC	PAIRED	ILLUMINA	Illumina NovaSeq 6000	PRJNA311274	SAMN20257495	BS16-220-M2	BS16-220-M2	Hive	2014	France: Vaucluse	thorax	NA	NA	male	NA	NA	NA	NA	male	thorax		NA	NA	France	Negative	0	0	0	0	0	237	0
SRR15173348	27508568	8252570400	300	BS16-314-M1_GAGATTCC-ATAGAGGC-BHCFFJDSXX_L004	WGS	size fractionation	GENOMIC	PAIRED	ILLUMINA	Illumina NovaSeq 6000	PRJNA311274	SAMN20257540	BS16-314-M1	BS16-314-M1	Hive	2014	France: Vaucluse	thorax	NA	NA	male	NA	NA	NA	NA	male	thorax		NA	NA	France	Negative	0	0	0	0	0	257	0
SRR15173846	27467329	8240198700	300	BS16-338-M3_TAATGCGC-CAGGACGT-BHCFFJDSXX_L003	WGS	size fractionation	GENOMIC	PAIRED	ILLUMINA	Illumina NovaSeq 6000	PRJNA311274	SAMN20257586	BS16-338-M3	BS16-338-M3	Hive	2014	France: Vaucluse	thorax	NA	NA	male	NA	NA	NA	NA	male	thorax		NA	NA	France	Negative	0	0	0	0	0	174	0
[truncated: 1,093 more rows]

## Sheet: Honey bee RNA
Run metadata												Sample metadata																	Derived metadata							Count data
[truncated: 3,175 more rows]

[truncated: 1 more sheets: Varroa DNA]
