# Supplementary material for: Data mining reveals tissue-specific expression and host lineage-associated forms of Apis mellifera filamentous virus
Source: PeerJ. 2023 Nov 14;11:e16455. doi: 10.7717/peerj.16455 (PMC10655722; doi:10.7717/peerj.16455)
Supplement: Supplemental Information 13 — Each page lists a different set of kmers that were used to quantify different classess of sequence. [file peerj-11-16455-s013.xlsx]

## Sheet: AmFV
Supplemental File S2. Kmers of length 31 that were extracted from reference sequences as described in the text that were used to identify exact matches in Sequence Read Archive run accessions. Each page lists a different set of kmers that were used to quantify different classess of sequence.
kmer	classification
CGTAAACGTGACCGAGAGAATCGATAATGGC	shared
CAGCAGCAAATTTTCTCCATTTCGACTCTAC	shared
ATTAGTCGCACTCGTAGTAGAGTTAGAGACT	shared
ATACTTGAAAACGCTCGGTTGATACGAAGTC	shared
CAAGGCCAGCCACGTGTCGGCCGGCTTATCG	shared
AAGTCGTACACCAAGTCGCAGTAGATTTCGT	shared
AGTTCTGCTGCTGCTGCTCCTCGAGTCGACC	shared
CGACTCGGACGCGGAAGAAGATTACTATGCG	shared
AGCTGAACGCGTTCGAACTCGAACAATGGAC	shared
TAAATTCGAATATAGAGTCTGGACCAAATAA	shared
ACGTTTCCGAACATCTTGCTCAACCCGACGC	shared
CGAAACGTAGCCGCTCAACAGCAACGCGGAC	shared
CACCTCCTCACCTAGGTTTGCGAGCAAGCTG	shared
CGATGGACGACGATCCAGCGAATCAGTATAA	shared
AGCTCGCCTTTATTATTTGTACAAACATGTA	shared
ACAACTGGACTCGACCATATCGACGCGTCTA	shared
TGTTCATCTGGTCCTCGGGCACGTTGTTCTC	shared
ACCAGCTTAGCACCGACCTTAGATTCGCGCT	shared
AACAGTCTCTGGACGCCCAACATGTACACGC	shared
ATTTATTTTGTTTCGTTGGTTTAATAGAATC	shared
CAAGATGACGAGCTACGATTCGCGGGCGTAC	shared
CCCGACGCTCGTCGACCGCTTGCGACGCATA	shared
AAAATCTGGCTGGTATGGTGGTAAGTACTCG	shared
ACAGCTTTAACGCACTGACCGACACGAACGA	shared
TACTTGTTCCTCACCAGGTCCGTCTTGATGC	shared
AATATTTTTGTATTACTATCTATATTGGTAA	shared
CATAATCGGCTTGCTGATATGGTGGTTCGTC	shared
ATGTGACGAGCGATTTGTTCGTCGCGCAATA	shared
ACGAAGCGCATTTGGATCGTCGACGTGAAAG	shared
TCTTGTAATAACGTAGCTTTGCTTTCCCACA	shared
CAAACAATAAAGTGTACCAAACGTGGTAACG	shared
CAACGTGTTGGCTAACGTATCCACCAAAACC	shared
TCAGGTATCGTGTTAATGGATGTCGTGTCGA	shared
CATTCGAAACGAAACCAAGTGGCTGTTTTCC	shared
AATGTACCTTCACGTAACTAAACGTAATTAA	shared
ACTGGTATTTGAGTCCGTCGATCAAGTTGAA	shared
AGACGGACAGAGAGTACCACCCGTACGACCA	shared
TGCGTTGGACGAGTGTGACTGGAACATGGAC	shared
ATTCGTTCAACTGGTTGTTGCGGTATCGTGC	shared
ACCGAACACTTGTTTCCCCGCATAGTGAGCG	shared
CAAAACGTTGAAGGTGATCATCGGTGATGCC	shared
CACATTTGGAGCGACCACAACCGAACTGGAC	shared
CTGGAAGCCCTGCTCGTTCTTGTGAAAAACG	shared
ATTCTCCAGCGGCGTCACAGATGCACGTTTG	shared
ACTTGGGTGAGAGCGCGTTCAATCTCCCTGG	shared
AGCGCGCCGAGACGAGCACGAAGGCAGGGGG	shared
AGTCGTAAGCGCTGCGTGTCGAACAAGAACC	shared
TGCCGCACAGCGCGGCCTCGATCGGGACGTC	shared
TTCTACGCCACGTGGTTGTGGGACCGCGTGC	shared
CGACTTTTTGATGGAATCGTCGAACGCCGGA	shared
ACGTCGCGTGACAACGAGCACACTGGTCCGT	shared
AGCCGACGCAAACGACCAGACGGTCAACTAC	shared
CATCCACCTAACGACGCCTCTTTGCAGTGTA	shared
ACGCGTGTTGTTCGATTCCATTATCCCGATG	shared
GACAGTTGTTTAGTCGAATCAGATGCAACAC	shared
CCTTTAGCAACCTGCGCGACGTGTACGCGAC	shared
ATTTTGCTGTCGGTCTCCCCGCGCAAGAACC	shared
CCTCGCTGATTCCTCGCACGAACCGCATCTC	shared
ATTCCATATCGCAATTCCCGTATGTCCGTCG	shared
ACTGGGAGCGCCATCAATCGCACCGCTGATC	shared
AAGACGATCGAGACGAACAAGATGGTCTACG	shared
ATCATTGCAATCAACTCAACCGAACCTTTTC	shared
AATCGGCGAAACATGACGACATGGGTCGCAA	shared
AACACGTCGTCGGAGAGAAGCAGCGCGACCA	shared
CATCGACGTAACCGGCCCAACGTTCCAACAC	shared
AAGTTGACATGAGTTTTGAAGCGCGGATGCT	shared
ACCAAACCGACAGAAACTAATTCAGTACAAC	shared
AACATACACGCGACACGCGCGCCACCGTCCA	shared
GCATACAACCAATTGCCCCTCATCCAGGAAC	shared
CTCGTAAATAGATCGTAACCTAACACGTGTC	shared
GACCAGCGCGCGTGGATTCGTTTCTTCAAGC	shared
TTCGACCATCTGGTCAGTAGTTCAGTTGGTC	shared
CTCAAGGAGAACCACGACCTCTCTGGTGACC	shared
TCGTGTATTGATGAATGGACTGATTGAGTAA	shared
CTCGATTCAATTTTCGAAAAGCTTCATCGCA	shared
ACGCACCGCGCGACGCAATACCTGCGAGACA	shared
TCGTGATCCGTGCGCGCGTGCACATGTCGAC	shared
TATTCGATCCGCGACACATCTGACGCTGTAC	shared
AACGAATCCTGATCTTGTCGAGTGCGACAAA	shared
AAGAGAAAATCGATCAGATCTTGATAACGGC	shared
CCACGGCACAACAGACATTTTGTGGGTACAA	shared
AAATGACGCATGACTCGCAACCTCCGGTGTT	shared
TACACTTGAGCGAGATAGCCCAGAGTTTATC	shared
TAGTGGCTCACATCACGATGAGCGAAGCGAC	shared
TCGATGTGGGTCAAAGTTGTGCGATGAGCCC	shared
TTCGAGGTCGTGTGTCGGTGAAACATTTTCA	shared
CATGAACGCGATTTCTTCAAATGCATCTTGG	shared
ATAGATTTACTCGATTCGATCAATCAAGTCA	shared
CTCATCCTGATCATGATTGAAAACTACATCA	shared
CGAGAGAGCGCGGACGCGAACGAGCGGTGAC	shared
ACCGATGACGATCGGCAAGAAATCACAAACG	shared
TTTGATCACTTCGATTAAAAAGCGACTGAGC	shared
ATACGAGGAAACGTCGTTCGAGGGGTCTCCG	shared
CTCGAGAACAAAAAGTTCGAAAAGACCGAAA	shared
CGTAGTTCGACGTCGTTCAGCTGTCGCTCAA	shared
TAGGTTGCGGGGCCACCTCGAACAAGCGATC	shared
TGGGTCGAGGGTCACGCGGTCACGATGTCGC	shared
ACAACCCGATCAACGGTATGCCGCTGAACAT	shared
CACGACGCGTTGCAGCTGTCCATCTATACCA	shared
GAATACCGGAGTATTCGCTCACAGTCGGACC	shared
CGGACGACGAGGCCGGACGACCGGAAACCGA	shared
GCATCTGGGTCGGTATTGCGGTAAGCATTAC	shared
ACCACGTAACAACGGAACTGTGGCGAAACGA	shared
ACTGCGCACGAGCGTGTTCTCGTTCGGTTGA	shared
CGAACGACGACCTACCGACCCGACGACCCGA	shared
GGCAGCTAACGTCGTATCCGTCTGATTGACC	shared
TAGTACACTGATGCACGAGACAATAGAGAAC	shared
ACTTCATGCGAGTCGGTCGATACTTCGGGTC	shared
CAAGATCGACCACTTGTTTGGCGATTACGGA	shared
AAGGTCGAAACCGACAGTAGATGGATCGCGG	shared
AATTCAACCGCACGATCGTCATCTCGTTCGA	shared
ACATACATCACCAACAAGTGCCGCACGAGTC	shared
AGCGCAAACCCGTGACGATGCGCAGACTCTC	shared
ATCGCGCTGGTTAACCACTTTTGTACTGAGG	shared
ATGGTGCGCGAGCAGCAGCAGCAGCGCGAGC	shared
ACCTCCGCACGACCGCGACGACCACGACCAC	shared
ACCACTAGTTCCGTCGCCAGACTCCCGTCGG	shared
CATCTTGTTTTTCGATATGGTTGTTCAGATC	shared
CCGCAAAATTTTATCTTTGTTCCACACACTC	shared
TAGAGGAAATGACTGAAAAATACAATGCTAC	shared
AATGAGTTTGTGGGGAAAGCAAATCGCGGTA	shared
GAAGTCTTGGTTACACGAAACAAGGTCGACC	shared
AGGTGGCTGCCGAGACGGCCGCGGACATGGC	shared
ACTTCTTAACGAACCCGTATATATACAGAAT	shared
AAGATGCGCGCGTTTCGTCGTAGTCATATTC	shared
AAACCTCGGTCTCTACGTCGCGGAGTGCGAA	shared
TTTATCTGTGCATTGGTCGGCGCGGCTCTCA	shared
ACGAAACCAACACTATATAAGATCGATACAA	shared
CGTCGTCCTCGTAATCGTCGTACGTAATCCA	shared
TGCGTCAAGACGTGCTTCATACCGGAGGACC	shared
CAGTCGATGTCCCAGCTGGTCAAACCGTACA	shared
CGACCGTAGCGATCGTACGCTGACCGATCGA	shared
CCGACGCAAACGACCAGACGGTCAACTACAA	shared
CGCGAGTACTTGGAGATGGTGCGCGAGCAGC	shared
ATTGGACTCGGACTATGCCAACTACATCAGC	shared
CCACGCAACGTGTCGTACGTGAGTCCCGAGA	shared
ATCGATCGTTCGAAGACCGACGACGACGTCG	shared
AACGTATCTACGACACGCTGTTCAAGAACGT	shared
ACCGCGGTAAACAACACGAAGACAAACTAGA	shared
ATATTTTTGTATTACTATCTATATTGGTAAT	shared
AGTAGTGGTAGTACGAGTACTAGCAGTTGCA	shared
CCACAATTGAGCGGGTCAGCATGTGGCGCAA	shared
AGATGAAAAGATTAATAAAACCGACAGGGAG	shared
ACCGCAACTATTTTGCCACTTTTGTACGGAA	shared
CGCACCGGTGTACGCAGGATACCCACCCCGC	shared
CGAGGTATACCGCACGGTATGGGAGATGCCG	shared
TCCATCGACGAGTCCGAGTCGCAGCCGAACC	shared
TGCGGTCGTTCGCCACGAACGCGGCGTCGAC	shared
CCGACCCGCTCCCGGTAGAGTTCTCGTCCGA	shared
TGAAGACGAACCAACTACAACCAACTCGACC	shared
CGCGGTGTTCGGGTCGTCGCACGGGTTCACG	shared
ATTCTCGTTGATGATGCAGCGACGACGAGTG	shared
CGCACTTGTAGTGGTCCGTCTGGAAGAAGAA	shared
CACCGAATCGGAAAACGCTTGGCGTCGAAAA	shared
ACTACCAATATCATCTACCTCGTTCGAGACG	shared
ACGACCGAAGCGTTTTCGTTGTTCATGTTGG	shared
CGCGCCGAGTCGCGTCGTCGATCGCGTCAGC	shared
CGTGTCTATCGTGTTTGCTCGCCGCGCAATA	shared
ACAATTTGAGTAATAGTGTTCGTTTCTACGT	shared
ACGCCGCTCTTGCCATGCGAGCTCCAAATGA	shared
AAGTCCATTCTCGAGGAACTGCTGTGGTTCT	shared
CCAACCCGTGAGCAATCGACATATTCGGTCC	shared
ACTCTTTGTTCGAGTCGGTCGTTCATTTACG	shared
TCCGCGCTCCATCGATGTCAACTCGATCGAC	shared
CGTCGATGTCAAGGTTGTACACGTGCCGACC	shared
ATGTGCGCGACTAGTTCGCCCTTGTGCTCGG	shared
GCGCACCGGACTTTGCACGAGCTGCAGCTAC	shared
CCCGTTAGTCACCACCAAACGCATCAGACGC	shared
ACTGATTCATCAGACCATCTCAAACGCTCTG	shared
ATCCTCACTACTACGAACATTTGTGTCGCTG	shared
ATCGAGCGGCGGCGTGGGACTCAACATCTCC	shared
CTCCTCGTCAGACGAATCGTCGAATCCAAGA	shared
GCGCGTCGACCGAATCGCCAGTTGGAGTTCC	shared
AAATGGAAGGAGTAAGGTAAACACAACAAAA	shared
AGTAATCGGGCATCAGTCTACGACCAGACCG	shared
AGCCGTTTTGCTGACCGGCATCACACGAGCC	shared
ATGGTTGGATCGATCCGAATCGGAATCCGAA	shared
ACGTCGGTCAGCAGATCGTTGCGTTCGGATA	shared
ATCATACACAAATAAGACCGACTGCTCGGTC	shared
CGGTTCAGCAGACTCGCTTTCGACGAGTTCC	shared
CGACGACTCTCCAACTCGTAACGAGACACCA	shared
AACATTGGCGTGTCGTCACTGCTACAATGTG	shared
CGACCGTATAACGCAAACTGTACACACCAAC	shared
AAAGCGTTTTGGTTGCGAGTAGCAAAATATA	shared
TTTGTCTGCGGTGTCGCCGGTGCCGCGCAGC	shared
CAGCAGTCCGAGCGACTTTTTGATGGAATCG	shared
ACATATGGTGTCGGAACGTTCGACATAGGCG	shared
AAGCGCCCGAGGCTGCTGGTCCGCGCGGGGA	shared
CGATCCGACCACGTGCATCGCCTTACCGCCG	shared
TGCTTGTTGAGCGTCGATAACGACGATGCCC	shared
AAATCGTTCGTCTCCACTAAATTTTTGGATT	shared
GACCACATAAACGCACGGTCGAACCAACGCC	shared
CGCCAACCGGCCGTTACCACACTCGATTCCA	shared
AATTTCAAAGATTTCGAGCAGAAAGTCATCG	shared
CAGGACGTCATCGCGAGACATGTCCGCGTCG	shared
CGAAATTTGTTTATCACTATTAAAAAATACA	shared
ACGAGTTGGCCAGCGTGCGTACCGCAAAATA	shared
ACAATGTTGATGCTCGTTTGGTCCTCGCGAG	shared
AGGCGTCGTTGAGAGCGTCAGACTTGTAGAA	shared
CACACAACTTGAATCAATCCCAGTCGATGTC	shared
ATTGTATTTGTCCACGAGCTTCATGTAGGTC	shared
TCGTAGCCACTGCTTCGCGGTTCGATTTTTC	shared
CATCTTGGACGCCAGCGATCGCGAGGACGAC	shared
CGCGGCTTCCGATCATTCCCGCGAGCCAGCA	shared
CGATCGAACTAGATCTTACCGACGCTATTCA	shared
CGTCACAACAGGAGTCGCAGCGACGGTTGAC	shared
CTCCACGTGCCCACTTGGCCACGTGTCGGTC	shared
CAGAACAAGCTTCGAAACCACTCGAGCGCTC	shared
TTCGAGATGAGCAAAACCGCCGGCTCGGGAC	shared
CATAATGACCGGAGTGAACGAGTTGCGAGCG	shared
ATTGGTCACATGGATATCACGCTATCAACTC	shared
CGAAATGCGTCTCGAGCTTGAAAAAAACCTA	shared
CAACGGACGGAACAATGGGTGGAACAGGTAA	shared
AGTACTTTGGTATTCGTCACTATAATTTCAC	shared
CGTTACGGTAGATTATCCGTGGGATTCGGTC	shared
ATACTTCCGATCAATCACATCACCGCTCCAC	shared
AGGATCCGGAACACCCGAAACCACAAAGACC	shared
AGCACTACCGGAAACAAACACAGAATCTCGA	shared
CCACAACGGGACGGCCGTCACGTTGTCGAGG	shared
CCTCAATAACCTGCTACCCGGAATGGTGCCC	shared
ATACTGCATCATGTTGTGTTGGCTGAGCTCA	shared
AAAAAAGAGATCTTTGAGATCATGGTATCGC	shared
CGATTCCACGCAACGTGTCGTACGTGAGTCC	shared
CCCGTACTCCGCTTTCCTGCTGGACTACTCG	shared
CATATATACATATCATCAATCGCATAATCGA	shared
CAGACGAAGCGGCGGAAGCCAATTGCTGTGC	shared
CGATCGGGCCGGTCGTCCCATATTTCGCCTC	shared
GAACCGACGGTCGGCTTCCACATCGCCGGCC	shared
GAAGCTCGTTGATGCGTTGGACGAGTGTGAC	shared
CGATCCGCGAGCACAAGATCGGTAAGTGGTC	shared
TGGCTGTTATAAAATCGAGTGTCCGAAACGC	shared
CTGCGACTTGGTGTACGACTTGTTCCGCGAC	shared
AAACGCGCGCATCTTTATACTCGCGAAACGA	shared
AGTCGACATCGATCTCAGCGACACGTCCTCC	shared
AAACTTGATCGCGAAAGAACGTCTATACCGA	shared
TATCCCTTCGGTTTCTCTTGTTTTGCTAGTC	shared
ATAATACTCCCCAATAATACTCTCAATAATA	shared
CGAAGAACCAAGTCGGTCTACAACCGAAACG	shared
AAGTTGGACAAATCGTTCGTCTCCACTAAAT	shared
CCGACCCAGATGCAAACACACACGACTGCTC	shared
CGCGGCGATCTCGTGGATGCGGATTCGTAAA	shared
GATTGAAGGTGCACGGTATGCGGATGGTAAC	shared
TACTTGGTCTACATTCGGCTCGTTGGGTCGA	shared
CGAAAACCCGCCGCGTACTTGGGCCACGGTA	shared
CGACCCGACGAGGCCTGTCTCCTCATCCTCA	shared
TCTGAAGCGCCAAACCTTGGCCAGCTGCTAC	shared
CGTATCAACAGTTGTCCAATCGGTTTCCCAC	shared
CGCGAACCGAGTGCGACGTCGTGAGATAACG	shared
CATGCCGAACGAGGTGCCGGTTTACCTCACG	shared
GACGCGAAGGTCCGCGAGCGTAAACGACGTC	shared
AGCTTCCTTCATGAGAAAGTAGAGCATGTGG	shared
CGTTACCCATCAAACTGCTGCGAGTCTCGTA	shared
TCGAGCGGTTGGCTAGCGGAAAGATCGTCGC	shared
ACCACTCGAACCGCGCACCACGCGTTATCGC	shared
CCGTACCTCGTTATGGATCCCGCACGCGAAA	shared
TCTTCATTCGACGAGCTAACGTTTCGTCAAC	shared
TCCGTACATTCACCATGCTCAACTAAACGAC	shared
GCGGGTTCGCAGAACGGCTGCGCGGCGTTCC	shared
ATGGTGGTTGGCGTCGTGGTTCTTCAGAATG	shared
CGGTTATACCATGCGAGCCGGTCGGTGAGGA	shared
TTATCCGACGGACAGACTCGCAGATAAAGAC	shared
AGAGTGTAGACGAAAGCGTTTACGAGGAAAC	shared
AGCGACATCGTGGCGCATTCAATGGAAATTC	shared
ATCAACTCAACCGAACCTTTTCATCGACGTA	shared
CTACGCTCTATCTTTCTGTCATGCGACCAAC	shared
CTGTAAAATCTAGTATTATCACTAGCTAAAC	shared
AAGTGTACGTCGGCCTTGACTTTGTACACCT	shared
CTACGTGCTCACCGAGGTGATCGTCGTGCGA	shared
GCGTTACGCTGCACGACTACTTTTTGCAGAC	shared
AAAAGCGATTCGAGGCGGGCAGCGAGATATT	shared
CAATGTACGAGGTTCGAACAATAAACTACAA	shared
AGATTTTTACAAACCATATCAACCAGAAGGA	shared
TCAATCCGTTGTGACACCCATTACGCGTTAC	shared
ACACGTGTCGGTGTTGAGAGAAAAAGACGCA	shared
CGGAACGCGTCGGAGCAGGTCTCTGTTGCCG	shared
AGTCACATCTTGGAGGAAGCCGTTCACGTTA	shared
ACGCCACTCGAAGACTCGCTCTACCGCATTC	shared
AGCAGTATCGCTACGACCGGAGCGACGAACG	shared
AAAAGCTTTTCTTCTCATGCTAAGACGCAGT	shared
CCGATCTGATACGAGCTACAATAACAGCAGA	shared
CATCGTCCAGCTTGAACAACAGTCCGAACGG	shared
ACAGTGGGACTCGAACGCACCCGCCACCCAT	shared
ATCGAAAAGTGTCCGCAATGGCGATTCTTGC	shared
GCACGCGAGTCGCTCGCCCTCGGATCGGTCC	shared
TTGAAACAGGCCACCACGTCGAACGACTTAC	shared
ATGTCGAACAATGTCAAATGTAGGTGGGTGG	shared
ACTCGCTCGTGCACTACGATCCCGATTGCGT	shared
ACGGAGGTCGGAACCTTTACTGTGGGCGAAC	shared
GAGGTGTATCCGTCGACTTTTTATCGCGGAC	shared
GTTTAGTTTGTTGTCGGTTTGAATCAGTACC	shared
TATGTCTAGTCCAAGAAACCAACCCAATATC	shared
ACAATACCGCCCGTAACGTCGAACGTAACGG	shared
CGAGGTACGACCGTTGCTGGACAGAGTGAAC	shared
TTGTTCGCGAGCATCGGGCGCGGCGAGGACC	shared
CCAGCCGGTCCTGATTTTGTTGTTGTTTTCG	shared
CAACCGTGCCCGTTTGCGCGCCGTCCCGTCC	shared
TCGACGGCGACCGTGGTCGGTGCAGCCGCAC	shared
TGGTGGGGGAACCGTGGGAACCGCGGGGCGC	shared
ACTCCGCTTTCCTGCTGGACTACTCGAACGA	shared
CCGCGCGACCACCGACCTGATGAACTGGTAC	shared
GCAGAATCAGAACCGTGAAATTCATGGGACC	shared
CCCGTCGGCATCGTCCCGTCCGAGCTGGCGC	shared
AACGGTGATTCGAGCTCTCGACCAAAACCAC	shared
TGACTTTTCGTTTTTCACGCTTGGTGCATAC	shared
TCGTACAAATAGTTGATGAAAACGATCTCCA	shared
ATGTCGTATAGCACCAAGGAGATTCGTTGCT	shared
AGCACCGAGTGACGTGCATTTGTGTTTGTCG	shared
CATCAAACGTCTCAAACCGAATGAGAACTAA	shared
AGATCGCGAACCCAACACCGAGATCGACAAC	shared
GAAAACGATGGGCGACTCTGGAGGAAACGGC	shared
CTCGTCGAATGAAGAAGGTTCGTGCAAAGTA	shared
ACCAATCTCGTCGAAACGTTTGTCGCACTCG	shared
ATTACGCTTCGGCGACAATCAGTTCTTTGAA	shared
GAGACCAAAGGACGAAACAGCGATACAAGGC	shared
AAGCCCTCATTGTGCAATAACGACTTGTCGG	shared
AGACGAAGACGACACCAACGAGCGAACACTC	shared
CGACCTCGCACCTTTTTGCGGATCGCTTTGA	shared
ATCATGGATCTGACCGACTGGATGCACGGCA	shared
CAAAGGCCTTTTTCCGGTAACGTTCACCGGC	shared
ACGACCGTCGACTTCCCACCGCGTCTCCACT	shared
AACTGACCCACACGGACCAAACGGGTGACAA	shared
CTCTATTTGGAGGCGGTGCGGCGGTAACTTA	shared
ACATGTTTATCCAGCTCTCCGAGTCGCAGTC	shared
CGCTGGAAGAAGAACGCACTCTACTCGCAGC	shared
CGCACAGCCATGTCGCTGCACGCGCGGTCCA	shared
ACAAATCGTTCGTCTCCACTAAATTTTTGGA	shared
TGGCCGACGACGCTGTTGAGGAGAAGCGGGC	shared
AATACCCGACAATAGCACTTGCATTCGATTC	shared
CAAGATGTACGCGTGACGTGACGTCTCGTCG	shared
ATGTACTACTCGGTGGACTTGTTCGACGACG	shared
CAGCGATTCCGAGACGGACCGTTTTTATCGC	shared
CCAACGCACACTTTTACGGGTGGCGAAACGG	shared
CTTCGTAGAGACGCGTCCAATTGATCTGACG	shared
ACGCGTCGCAAGTCGCGTACGACGCACAACG	shared
AGATATCGCCGACAAGGAACATAACAATCTG	shared
GCGTGCAATTGCACACGGGCCGCAAGTAACC	shared
CAAACGTAAACGCAATGCAAACGCGATCACG	shared
CCGTGAGATGTTCAGCGGCATACCGTTGATC	shared
AAACGAACACACGATGCAAACTGAAATATTT	shared
CGTCCCAACCGGAGTCAAGTGTTTCCCGTCC	shared
TCCGTCGCACTCGTGTCCTAGTAGAGTCCTC	shared
AGGTCGACACGGGAGCCCATAGTTTGTTCAC	shared
CTACAGCGACTACAGCGATTACAGCAATCAC	shared
CAACATCTGATACAGCTCGACCTAAACGTGC	shared
CGCGTAGACGGCGGTGAAGACGATTTTGACG	shared
AATTGCGCGTCGAACGGCATCATCAGCACAC	shared
CCAGTCGAGCCGGTCAATCCAGTCGAGCCAG	shared
AAATGTGGCCGAATATACGTCGGTACACCCA	shared
AACAACTCGAACGGATGCTCGTGACGGTGCG	shared
CAACAAAAATACTTGAACAGTTTAACCGCAG	shared
ACAAGAACTGGTTGTGGGAAAAAAGCGTTCG	shared
TGGCGAAAAGGCCGAGATGCAAGAGAAAATC	shared
ATCGTGTTAATGGATGTCGTGTCGACCAGTC	shared
TCGTCCGCACCATCGTCCGCACGCGCGCACC	shared
ACGCAACCGACCGTCTTCGTAGAGACGCGTC	shared
AGTCATTGCGAAAATGAACCACAATTGAGCG	shared
ATTTGTACAAACATGTAAAAGCAACTGCGCG	shared
TTACGACAAACCCGACTAATAAAACCAACAA	shared
AGTGTAACTCTCGTCGCGAATAATAACAAAG	shared
CGGAATTTTCCACGAAACGCTGATTGGCATC	shared
CTCATGGAAGACATTTACAAACTAGCAGTCC	shared
CGCGACTGCCGGGCCATATCAGATCGCTAAC	shared
ATGATGGCGTCGGCTCGCTCGTAATGAGCGG	shared
ACGTGTCGGTGTTGAGAGAAAAAGACGCACC	shared
AGACGCATCCAAAGTTGCGCCGACTGCGTGC	shared
CCAACAGAAGCGAGGTGGTGAGCAGTCTTGG	shared
TCGCTTCTCGTACAAGACTGTGTGGCGCACC	shared
CGACAAAACGTGTCGAAAGAAATCGTTTATC	shared
ATGAGGATATGCTGGACCCGCGGAGGAAGCA	shared
CCAACAAAGCGGACACCGCTACGCTTGACCA	shared
CCGATCCCTCCACCAACTGAACCACCTACGC	shared
CATCATGTTGTGTTGGCTGAGCTCACCGACC	shared
CGAGGCTCGTCGTTGCGCACGGTTACGATCA	shared
CCGGTCGACCGCGCCGCGAGCCACAGAACGA	shared
ACTCTGCGCCGCACACGCTTTTCTCGCAGCA	shared
TTCGAGAGAATGGGATCTTAACGAGCGGTTC	shared
CGTACGTGCGGCTCCACAGCGGCGGGTGACG	shared
ACCGCGCGACGCAATACCTGCGAGACAAACA	shared
ATATCACGCTATCAACTCCCTCTCCAGTTCG	shared
CAAAACGATCAAGACGAATTAGTGGAAGACG	shared
CTTCTTGATCGGACCGCTCTCTATCTCGCCA	shared
CGCTAGCATCTGCATGATTTGTATGCAGTTC	shared
ACACGCCAGTTTCTCATTTTACCCGCCACTG	shared
TCGTACTGGAACTCGAATCCGAAAGCTCACC	shared
TCTCGGTGTTGGGTTCGCGATCTCCGAACGC	shared
ACGAGACGGACGAGACGAGCGCGGGGAACGG	shared
AATCGCATACCCGAGCGCGAGATCGAGAAGG	shared
ACGTGAAACATGCCTCGCGAGAACGACGCGC	shared
TGCTACCACTTATCGAAGACGATTCGATAAC	shared
AACGGTCACGTGGGCGCCCCTCCACGCCGCC	shared
CGACGATCACCTCGGTGAGCACGTAGCGAAC	shared
AGACGTTCGAGCGAGCGGTCGCGGTCAAAAA	shared
TACAAAGCGACATTATTCAGTGACGCGTGAA	shared
AAGTAGAAGACGTGACGATTGTTCGTTTGGT	shared
AACATGCTGCCCGCTCTGAACCGCCGAAGGC	shared
AAGCGCCAAACCTTGGCCAGCTGCTACCTAC	shared
TCCGTCAGTCGCTTCGCCGGGTTAACGTTAC	shared
GAGAGGAAACCGAGGAGAGCGTGGTCGACTC	shared
CCTCTACTTTAACGATTTTTACGAGGACAAA	shared
CAACCAGTTGAACGAATCGATCGTGCCCGAG	shared
AAAGCGGAGTACGGGTCGTAGGGATCGTTGG	shared
CTGTCTTCTCTACACCAAACACATCGTGCAC	shared
TTTCGCTCTCTTCTCCAGTTTCGTCGTTATC	shared
TATATCGCCAACAAGTTATACCCAAGGCCAC	shared
AAGTTACCGGACGCACGATCTTCGATCCGCG	shared
ACAACCATCTGATCAACTTGTACTGCTGCAC	shared
TCTCCGATAATATCGAGGCTCTCGCTTTCGC	shared
TGCCGTGGTGCCCCACGTTGTGAAGGTAGAC	shared
CTACGCGGAAGTACGCGACCCGCAACGGGAA	shared
CGCGACGGGATAGCCAACCGCTTCGCCGAGA	shared
AAAACAAGAGAAACCGAAGGGATAACAGATG	shared
GACCAGTGTCTCGTGCGCAAAGGGTTCCCGC	shared
GTGCCCAACTTTAAACGCTTGACCAACGCAC	shared
TACACGTCGCGCAGGTTGCTAAAGGTATAGA	shared
TGGTCGGGTGCGCAGCAAACCACCGAACCAC	shared
AACAAATACAAGTAGGGCGCACGATACCGCA	shared
CCATCTTCCACAAACTACCATCTTGGTTGAG	shared
CTCGCTGCGCGGTTGATGCGAAAAGACTGCG	shared
CGTCCGCTTCGGCTTTCTCGGCCTTTTCGAC	shared
AACAGCCAATCCTGTACAGCGAGTACGCTCG	shared
ACGATTCTCGACACCGGGGAACAAAAAACTG	shared
ACGACGAGTTGTCCTCCTCGTCAGACGAATC	shared
ATAGTCGCGAGAGACACAGCAACAACGGTCG	shared
AGTTTCTCGCGCTCGATTTCATGTGCATCGA	shared
GTCCAACGCCCAACCGTGCGTATCAAAAGAC	shared
ATCACCTCGACCTGCGGTAACTTGCGCGGTG	shared
CGAACGATCACGCTGGTACGATTCTCGACAC	shared
TCGAGCTACACTTCATTTGTTTCGGATTTGC	shared
CTCAAGTCGGTCAATCAGACACAGAGCAGCA	shared
CGTACGGCGGTGCGCTCGTAAACGCGTATTC	shared
TCTTGCCATGCGAGCTCCAAATGACGCCGTC	shared
CGACGAGACGATAGACGAGGGATACCTCAAC	shared
ATGTTTCGTTCTGTTCCATCAGGTGCCAAGG	shared
CTCTGGTTCATACTCGGCACGCCTGGCACGC	shared
CCGACGACCGCAACAGGAATGAGCAAGTTCA	shared
AAAAATCCGAGACTCGTTGCATACACAAAGC	shared
CGCACAAGCTGTACAGCGAACGCACTGCGCG	shared
ACGCTCTAGAGCCTGGACCATCAAACGCTCT	shared
CGTTCCGTGCGAGGGACGCGCCTCGTAGACC	shared
CTATGGCCGCGAGCTGCTTCCAATCGGTCGC	shared
AAACCGCCGGCTCGGGACACGACTGAAAGAC	shared
CCGAATCCTCGATTGACGTATGGTGCGTTGA	shared
ACTCCGAGGCCGAACTACGTGAGTTTGCCGC	shared
CCAACCAGGTTCCGCCCGATCACCCTTTGTC	shared
ACGACCCATTCGACCTAGATAACCGGCCGTA	shared
CATCTTTGACGCATACGAGTTTTCCGATTAC	shared
AGTGCATTGACACAAATAGATATTCATGAAC	shared
TCTAGCTGCGACAAAAAAGAGATCTTTGAGA	shared
ACGCACAAAGTTGGATTGAGCCGTTTGTCCG	shared
CCACCCGCGGGCGCGCCGACCCCGCGGTTCC	shared
CCGGACCCCGAACTACCGCGAACGATCACGC	shared
ACGTCGAGCGTGGTACACGATGCGACCAATG	shared
CGCGGAGTTCAATACGGTGATACACAGGGAA	shared
CCACGCAACAAGTCATTGCAGGCCGCACGCC	shared
CGTACCGCGTTGAAGAGTATGCAAAACGATA	shared
AACACTAGCTACACACGAGGCGCTCGTTATC	shared
ATCATTGATACAACCATCGATACAGACAACA	shared
AAGAAGTCGATGGTGTTGAACAATCGTCCGT	shared
CGCGACAAAAAGTTGTTCCGCTATATAGACC	shared
ACTATTATTGTAGTTTATTGTTCGAACCTCG	shared
ATCGAAAAACGGGTCGGTCGGTAGATCGCAG	shared
ACAATGTACGAGGTTCGAACAATAAACTACA	shared
AAAGACGGGCTTATCCGACGGACAGACTCGC	shared
ACAGCGAGTCGTACCGTCGCGCGGTAGCTCG	shared
AAAGTGGCTCGGAGCGGTCGGCCCGAAATCC	shared
CGGCGACCTGCTGGCCAACCACGTCCTACCA	shared
CGTGTCGACCAGCACGCACAGAAACAAGCAC	shared
TCCATTCTCGGTCGCCATGCTGCTCTCGCGC	shared
GCCAGCGAGTCGCGCTATCGGCGAATCGGAC	shared
TGCTAGCGCACGTGTGCTCGCGGACCGTCTC	shared
AGTGCTCTCGAAACAGGACACAAGAAAAACC	shared
AATACGATCTACGTACGTACAATCGTGTTAC	shared
CATGCATTTCTATCATCGGGTATACCAGAGC	shared
ATCAACTCGATCGATCATTCGGTGGAACTGG	shared
CGTCGACGCGCAAACGATTGACGTCCCGATC	shared
CAAACTTCTTCTACGGCTTGAACTGCGTAAA	shared
ACGAAACCCATGTCGGTCCACTCGGTACGAA	shared
ATATAATTAAAATATAGTCAAAAATACAAAG	shared
GCAGTAGCGATGGAGCGTCCATCGTCACCGC	shared
ACTCCAGCAACGATGCCGACTCATGTGCGAG	shared
GATCTGTTTACAGCGGTTCGAGTTGAATCGC	shared
CCTCGCCGCGGCGGTTTTTTGTCGCTCCCAC	shared
ACCAAACACAACAGTCACAGACGCAACAATC	shared
CACGGTGCCGTCGATCCCGAGAAACGGCATG	shared
CATTCCCGACTCGCAACGCTCACCGTTTCAA	shared
CGGCGCTGCGGTCGCCGGCGGCGCGTCGGTC	shared
AATGATTGCATCGATGTCTGCGTTTGAGTTG	shared
TGTACCACTCGTGGCAATTCCGACACGTACC	shared
AATGGTCACGATCGAACCAAGTCGGTCAACA	shared
AGTTCGAGGAGCGTTATCCGGGCTACGTAGA	shared
AGTCGGTTCGCTCGTTCGCTATGCGCAACAA	shared
AAAGATGAGTCGGTCGAAAGTGTGTGGACAC	shared
AACACACACGGCCGTTCAGCGAGTCGGCCAA	shared
GCGGGGCGCACAAGCTGTACAGCGAACGCAC	shared
CGCCGCGTGGAAAATGCGACGCGTTCGTTCA	shared
TATCGAAAGGCCAGCAACATCGTGAACGTGA	shared
TCAACCGGGAACGTGGCACCGTAGTCGGGTC	shared
CCCGCGTCGTCCCGCCGTCGTCCGCACCATC	shared
AGTTGCCCAGCTGTTCAGCTTGTTCGACGAG	shared
TTCCAACATATCTGATGGTAGCAACACTATC	shared
TGTTCTTCGTAGCGAAGCGGCATTGGCCGGC	shared
CACACAATATGACATCAATGCAAACCCCGGA	shared
AAATAAAGCGGGCTCGAATTACACGGAGGGT	shared
AATTTGCGGGTCTCGCCGCGCAACGAGGGTC	shared
TCTTGTCTCGAGCTTTGAAACGTGCTCGTTC	shared
ACAAGAACGAGCAGGGCTTCCAGGTTGATCC	shared
AATCCCGTAATCAATACCAGGGTCGCCCGAT	shared
AACTTGTCCGCCGTGTGCATGTCCAATATCA	shared
CAATACGGACGGCCGATCTCGTGCGATCGAA	shared
TAGTACCTTCGTCGGCGAGACGCGCTACGTC	shared
AGCGCAGCGGGAACATCCAACCTTGTGAAAC	shared
ACTCCCTCTCCAGTTCGATTTTCCTTTATAA	shared
ACCTTTGAGTTTCTGTTTGGCCATCTGGTAA	shared
CCACTTTTCCCGACTCGTCTCGTACCACTCG	shared
ACACAGAACCATGATAGATTCCGTCTCCATC	shared
AAACATCTGCTCGCCGTGTTTAACGGTTGTG	shared
CTTTGTAGGGGTGTCAGACGCGAGTGGCTCG	shared
ATTAGGGTACCGTTTTCCGGTCAATCGAACC	shared
ACCTTCAATCTGTACATCGTGTTACCGGTGG	shared
TTCTCGAACGTGAATCGCTATCACCTGCTAC	shared
ACATCTACTACACGATTGACGAAGAGAGTCT	shared
AACTGTTGATACGAACGGTAGTTTTGAGAGT	shared
CCAAGATCGACCACTTGTTTGGCGATTACGG	shared
GAGTCGAAAGTTGGTAGCGCGTCCGTCGGGC	shared
ATGAAGGAAGCTATGACGACGATGAACCGGA	shared
CTCGTATTCGGGATCAAAGAGGGCCAGCAAC	shared
CCTCCATCTCAAGTCGCCACTCTCGCTCCGA	shared
CATCTCGACTTTGCCGCCTACGCTCGACATG	shared
CAAGTCGGTTGTCCGAACGGTGCGACGATGG	shared
AAAAGCGTTCGGCACGAGTGGACGGTCCGCG	shared
CAGATTACTTGCAGCACGCAGTCGGCGCAAC	shared
CACCGTGACGAGCGTGTACGACGATGACGAA	shared
AAAACGACTTGTTGGCGAGCGAGTTGAAAAT	shared
TGATGAAAACGATCTCCACAATGGGTTCCAC	shared
CAATTTGGGCGCTGCTCTCGTACGCAAGGTG	shared
CAACAAGTTGACCAACTCGGAGCGTCTCGAC	shared
CAACAGTAACTCGCATAAATGTACCATCGAC	shared
GCTTCTTGATCGGACCGCTCTCTATCTCGCC	shared
CGGGCCCGCGACGACGACCACGACCTCCGCA	shared
GTTGTCCGACTGACTACGTCGTCTCACTACC	shared
TGCTGCGCAGCTCTTCTATCAGTTTGTTTAC	shared
CGACTCGTGAGTCTCGGCTGGTTGCGGTACA	shared
ATGCAAGGAAATGCGCCAGCAAGTATGCACG	shared
GTCTATGCCACCGTACCTCGTTATGGATCCC	shared
GCATTGACACAAATAGATATTCATGAACTAC	shared
ATGACGGTCAAGGTGGGCAAGCACGCGCAAC	shared
AGTTGGGGTCGTGCGCAGTATTTGCAAGCGA	shared
AACACCATGTGGAACTACTTTTTCCTCGGCG	shared
TTGCGAAAATGAACCACAATTGAGCGGGTCA	shared
CGACGAACGACTGTTTGCGTATCGTGTGCGC	shared
CGTCACGGGCACGTCACGAGCGGCACCTCGC	shared
AATTGAAAATAACAACACACGGGCAAGCGTG	shared
TGTCGCGATTGTAATACGTGTACGCTCTGAC	shared
ACTTGCGCTTCTACGGCGGTGGAGACGAGCG	shared
AGAGGGGTACGCGGACATCGTGCCGGTCGTG	shared
CATTCAAACGCACGACGCTTGTATCGAGACG	shared
AAGTTCGCCCATCACTTGGGTGGAATTCCTT	shared
ATCAATTGGGACGAGCATTTCCCGCCCGGCA	shared
TCCTTCCGTTTACGGCGATACTCTCGCACCA	shared
CAGCGAGACCGAACCAAACAGCGATCCCTAC	shared
TTCGTTTAATCGCAAAAACGACGGTGCGTGC	shared
CTCTTCCGATCCCACGGCCGATCCCTCCACC	shared
CTTTCTAATCGCCTACTTAATAAATGCGCAA	shared
ACAAAATTATCATTTTGTTCTTCCATATCCT	shared
TCTCCACTCTGCCTCCACCGCCGTTTGTGAC	shared
CGTTTCTTCAAGCGCAACCACGACCGCAGTC	shared
ATGCCGCTGAACATCTCACGGTGTCTAAGTG	shared
ACTTGCAGTTCCGCCGCATATGAGGCGTCGC	shared
CAACGGGAGCGCCTTGTAGTCGCCCGCCAGA	shared
AGTGGCCGTTGTGTCGATGTTGTTGGTGCGG	shared
AACCGTAGAGGCAGGTAGACGCGGTTTTGCG	shared
CGGATGAATTGGATCGAACGAATGATGCTCA	shared
AAACCGACCCATGAAGACGCGCAGGGTGTCG	shared
TTCATGTACCAGATGATCGAGTCGTGCGACC	shared
TGCAGATACCGCGCGGCTTGCGGGGAAGACA	shared
GCGGGCGGACCAACACCTCCGTCGGCCGGCC	shared
ATTACGATTACGTGGTGACTCACTGTTGCCG	shared
AATCAATTTCTACCAAGCACACGACCGGGCG	shared
GACGCTCGTCCTGACGCGTCCTGGCGCGTCC	shared
CTACGAAATCTACTGCGACTTGGTGTACGAC	shared
CTTGCGGATCGGGGTCCAAGAACGAGCGACG	shared
ACACTCGTTATACTAGTTATACTCGTTATGC	shared
ATGCTGAGATCGCTGATCGGTAGTGATGTGA	shared
ATTTCCATCGGTGGTAGATAGAAGTCATTCT	shared
CGCGCACAGGTCCGAGAGTACGCGGTTGAAA	shared
ACATGCTCTACTTTCTCATGAAGGAAGCTAT	shared
AACGATTGCACGCGCGATCGCTCGTACGTTA	shared
AGCGAGAACGACGACGCCGACGAAATTTGTG	shared
CCGACGACGCCTACCCCAGTTGGACGAACGC	shared
GCGAGTAGCCGCCCGCGATGCTGGCGAGCGC	shared
TAATTCCTGTTCGCGTTTCTCTTTGAGCATC	shared
TGCCCGAGCCGCACGCCGAGTCGCCCGATCC	shared
AGCGCTTCCACGTACTTGAGGCTACCCTTGG	shared
CTCGTCCAGCGAGCGCAATCGGTACTCGACC	shared
GAGTGCGGGTGCGACTTGTAGTTTTGCGCGC	shared
CTCCAAAGTGGATCGACCGACCGAGCCCATC	shared
ATTTTGCTCGTGCGGACCTCACCGACTTTGC	shared
ACGGGTGACAACTGATGCACCAAAGAAAGGC	shared
AAATCTCGTCCACCAAAGTTCCGACTACGAC	shared
ATTTTGGCTGAACGTCAAAGTGATCGTCCGG	shared
ATCCCGACTCGCCAGTTGCGGAGAACAAACA	shared
GCAAACACGAGCGCTCGAGTGGTTTCGAAGC	shared
ATTATGCGCTTCAACGAGCGCGAGCTGAGCT	shared
ACTAACAGGATCGGTGTTATTTGCTCGGAAA	shared
TAAGTACTCGGTTTGAGATTGATGTGGTTGA	shared
TTGACACCTCCTTCAAACTACTTGTTCCAAC	shared
CGCACGCGCGAGTTTGTACCCTCAAGAATCC	shared
GACGCGCAATACGATGCAATCGAGTCGGAAC	shared
ATGACCGCATAGTCGATGATACCTCATCCGA	shared
TCAACGCGTGATCAATCGGTCGACGTGATCA	shared
GATCGACGAAACTGGTATGAACGCGCACACC	shared
TCAATCTGTCGGAGCGATTTTTGCAAAAGAA	shared
GATCGACGCATACCTCGACAACGTGACGGCC	shared
CTCCAACGACACGGCGTCCATGCCGTACTCC	shared
CAAAGGGTGATCGGGCGGAACCTGGTTGGTG	shared
CCGAGCTCTCCACCGCTATATCTCGAGCCAC	shared
ACGTCAATGATCGCGCTGTCACTCATAGAAC	shared
ACGCGTTGTCGTTCTTCGTGCAAAAATTCCC	shared
AGGAGTGGCACACAAACGCTCTGCAAATTTA	shared
TGATCTCGTTGATCTTGCTGCGCTGGTTCTC	shared
GAACTGGGGAAACGATCGCGCTCCTCGGATC	shared
CGGGGAGGCCGAGGATCCAGACTTGAAAGAC	shared
CGGACCAACAAAAATACTTGAACAGTTTAAC	shared
AGCGGTGCGCGCGACCGGTCGGTGGTCACGC	shared
CTTCGTCGTTCTCGCACAACAAACCTCAACC	shared
CGCGTCGTAATCGTGTTCCGGAGTCGGCGGA	shared
CCAAGCTTCGCTCAGTGTAATCGCACCGCTC	shared
AACGACGAATCTTGACAGCGACATTAAGGAA	shared
AAGGCAAAGACATCGAACACATTCGCGAGTG	shared
CGCAAACTCCATCGACTTCAAGTAATCTCTC	shared
CCGACAGAAACTAATTCAGTACAACTGAATA	shared
CTATCGAAAACGGGCCAGCCTCAACAAGATA	shared
CGCGTCCGACGATCCGGCTGATACAGCGGGC	shared
AAGTTGCACTTGCTCGCCCAAGCGTTCAACG	shared
ACGTTGCGCGACATTCTGAACGAATCGTCGC	shared
ATGAGCAACAGTCGCATCAAACCGCGCGAAC	shared
ATTCGGTAGAGTCAACAGGAAAGAGACCCGA	shared
AAGATGGTCGGTACGTTCTTGCGATCGTAGA	shared
CACGCAAAAAGCGGTACCGAGCGCGATCGGC	shared
CGATCGCGTTCGTCCATCGCGCGAAGGGCCG	shared
CAACGGTTCCGATTCCCAACTCGTGTGGTGG	shared
CCTCGTAGGCTTCGCTGTCATCTGCGAACGC	shared
ACATGTCGGGCATGGCGTCGGGGTTGCCGAC	shared
CATGGTGTTCCGAACGCTTCTGACCATGAAC	shared
CATCATATCTTCGGTACTGTCGAATATCTCC	shared
TTCGGTAGAGTCAACAGGAAAGAGACCCGAA	shared
CAACAAAAAGCTGTGACGAGACTGCTCGGTG	shared
TCCACCCACTCGCTGGCGTCCAGCGCGCGGC	shared
CTCGCTGGACGAGGCTGCAGATTACACAGCG	shared
AATCTACTCGCACATTCTGGACAGCTTGAGC	shared
CGCGTGGATTCGTTTCTTCAAGCGCAACCAC	shared
ACGTTTTCACTGGCGTACTGGCGTGACTGAT	shared
ATCTCATTCGGTAGAGTCAACAGGAAAGAGA	shared
CGTACGCCTCGTGGACGGTCAAGTCTCGATC	shared
TTATCCATCGGTGGCACGAGACGCGCGAGAA	shared
TTCTATCATCGGGTATACCAGAGCATGGTTC	shared
CACGAAGCAAGTTAATGCCAGCTAATGCACG	shared
CGACAGGTTTTTCCGTCGTCGATCTCTCGAC	shared
GCCGCATCACGTTCCGTTTGGCGAGACGAAC	shared
AATGATAAGAAGAAAGCCCGAAAAGAGGAGC	shared
CGTCTCGAGCGCCGAGTGTCTTGCGGAATGC	shared
AGATCCAGCGGGTATCGGTCGACCGTTTCAG	shared
GCTCACCACGAGAATTATGTTGAACTGGAGC	shared
CACGATCGTCATGGCTTGCTTACTTGGGGAA	shared
ACTTGGCTCGTGGTCCCAAACGCTACATTGA	shared
TCACGCGATCGAACTCCACAACGACCTCCGC	shared
CTACCGGAAACAAACACAGAATCTCGACGAC	shared
CCTCCGCGTCGAAACGAACAAACGTGGCGGC	shared
GCAAGTTGCGAAACCATTCGGCGTAAGAGGC	shared
ATCATCGAACTGCGCGACCGACGCATATACA	shared
ACCGGTACGGTGGAGTTTCGGGTCCTCGCTC	shared
CTTGCCACAAGTGCGCAGTGTGACCGAACAG	shared
CGTCGAGTCGAAACGAATCGCGCGCCTCACC	shared
ATTTATGGATCTTTGCGCAGCCTGCAACATG	shared
CTCCTCAACTCGGTCAGACCGCTATAGCGAA	shared
AATCGGACTGAACAACCTTGTTCAAAGAGAG	shared
ACCGGTCGTCCCCGACGCGGACATGTCTCGC	shared
TATCCCGATGAACGCGATCAAGATATCCGGC	shared
AATACACACCTTCGCTCGAGGACTGGGAGTC	shared
ACGATTATCCATAGCGAGCCGTTTCCTCCAG	shared
GTTGAGAGGCGTTGCGCACCACGAACCGCAC	shared
TCCGCAATATTCTGGAGGAATCGCAGAAAAA	shared
ACGTGGAACCGTGCCGGAGTATTATCCATCT	shared
TACACTCAAAACGAAACCCATGTCGGTCCAC	shared
AAAAAGGCTCTCAACACGGTGGATGACATCG	shared
AGCGCGTACCCCGGTACATCGACATGTCGAA	shared
ACAGAACAAACTCACAAAACGAATCTAACCG	shared
AAATAGTGGCTCACATCACGATGAGCGAAGC	shared
TATTGCGGTAAGCATTACTTGGCCGACTTGA	shared
AACGAGCTAGCTGTACGAAAGCGCATCGGTA	shared
CAGTCTGATCGAGTACGGTAGCGACCGACGA	shared
CTGCCGCCGGGCAATCGGAGGAGTCTGAGGA	shared
TCAGAGCGTACACGTATTACAATCGCGACAC	shared
CGCACCGCCATTTGTCGCACCTGCGCCACCA	shared
ACTTTTTCGACCGTTTCGAGACCGAGTACGG	shared
TGAGGAGGTGGTTGGTGGAGCGAGAAGGGCC	shared
ACTCTCGTTCAATTTGAATGTGCGTTCCAGG	shared
CAGAAACTGTTGAGCGTCAACGCACCATACG	shared
TGGGTCGCAATATCGGCACGAAAGTTTTGAC	shared
ACGCCGCCGCGAAAGAATCTGATCGTCCCGA	shared
CGGGGTTCAAGGACTGGCGAACGTGTTTGCC	shared
AAACGTGAACCGCGATTACGCTCGTTTTCTA	shared
ATGAGTAGTCTCGCTAACCAGACGAGCCAAC	shared
ACAGTCGACAGCCATACAATATCCAATATCG	shared
CTGGTCATCCTGTCGGAAGCGAGTCAGAAGA	shared
CGCCGCTCATCGAAAACGCGCGGCTTCGTGC	shared
ACGATCGCCTAAAGAAAACGGATCGATAGAG	shared
GAAAATCGATGAAACGATACGGCGCTCCTAC	shared
ACACTCGCGAATGTGTTCGATGTCTTTGCCT	shared
TGCGTCTTGGTTGCGCCTCGTGCGAAGGGAC	shared
ATGCGGAACGATCGTACTACCGGGCGAGAGC	shared
CAGAAGAAGGTGGGGTACTTTCATCCGACGA	shared
TGTGGTTGTTCTTGCCACGTGGACGAGGGTC	shared
TAAATCTGTTGAACGTTCGAGAAAAGTACGA	shared
AAAAACCAAAATCGTTTTTGGCTGTTATAAA	shared
TCGTGGTTCTCCTTGAGTAACGATTGCACGC	shared
ATCATTTGTACAATTTGGAAATTGTGTTCTG	shared
CATCACGAGTCTCGTTATGCGGTCCTCGTCG	shared
TCAGCATCATCTCGAGCGGCGACAACGGACC	shared
TTTTCCTCGAAGAGTTGTGGGCACTTTTCGC	shared
CGAAAAAGACTATGACGAGGTACGGCGAGGC	shared
ATCATTCAAGATGTTCGATATGGAGTAATTG	shared
TTAACAACAAGCGACAGTCGACCTAACGAAC	shared
CGAATGGACTGCGATCAAAAATGACCTCTTC	shared
CCTCGGTGGTGGCGAGCAGGCGTTTGTTGTC	shared
ACACGAGTCAGCGAAACAAAGTAACAAAAAA	shared
CACACGGCCGTTCAGCGAGTCGGCCAAGTCC	shared
ACAATCCGGTCGCTGACAACGCATCTCGATG	shared
ACCCGTACTTCCACCAACGGTTCGACCGCGA	shared
AGAATCGCGGAGAGCTACGAGACGGTCGAAG	shared
ACGAGCGCCTCGTGTGTAGCTAGTGTTTGCA	shared
AAATGCCAAGAACACCTCATGGCGCGGCGAT	shared
CAGCTCATCACGGTCCTTCCGTTTACGGCGA	shared
AAAAAGACTATTATTGGTTCGTTGGTTCGCT	shared
TCGAAAGGGAACATGTGGAAAGAGAAATCGA	shared
CTTTTGTACTCATTGTTAATAAACCTGTTAA	shared
AAAGAAGCAGACTGGTTCCGCTTCGCTTTCC	shared
CCAGCAAAACCACCAACACGATCAATGTGGC	shared
AACAACCAGTTGAACGAATCGATCGTGCCCG	shared
CGTTGCTAGCCGTCGCGTTTGCTGCTTTGGA	shared
CGGATTTCTACGCGACTTTGGACTCGATGAC	shared
TGACGCTTATCAAAAGCGTAAGACGAGTTTC	shared
AGCAACCGCAGAACGCTGACTCGATCGCCCG	shared
GAATGGAAGTGTCTTCACGCCGTTTTTTCAC	shared
AGCGATCGTCAAAGACGCGTTCGAACGCAAA	shared
GAGCCTCTTTTGTTCTTCGTAGCGAAGCGGC	shared
AAGTGTTGCGATCGCTCGACTCGCGCCGACC	shared
AATCGACCATCGTCGTTTCCGTCGTTCGTCT	shared
ATGGTCGTTTCGTGGTCATAACTGGTCTTAC	shared
AAAACCGATCTACCAAAACTTCGAGAGGAAT	shared
TTACACGGTGGTTAAACGACGTGCTGTCCAC	shared
ATGGGTATCGTTGGAACGCCTCGAAGTCTGC	shared
AATCGTTCGAGTCGCTCGCCTCACCCTCGTC	shared
AAAAATGTGTCGAAGAAGCAGCCAAATCCAC	shared
AACTAATTTCAACTACCAGATCGCCAACAAA	shared
TGCGACACGATGCGACGCCCAGCAATTTCCA	shared
CTTAACTTGGAGCCGCCCGTTATCGGAGAAC	shared
CGGCGACGTAGCCTCGCCGTACCTCGTCATA	shared
CAAACTTGAGCAAAATCGGTACGATCGCCAC	shared
ACGTGCCGTGCGGCCATGTCTTTCAATGCGA	shared
TCTTGTACTGCTCGAACATGGACCACTTACC	shared
ACTATCTACGAGAACATGGACGCGATGTACG	shared
ACACGTAGCAAATGTACTTTGTGTATTTTTC	shared
CTCGACGAGCAGCATGCGCCGCTTTTGAGCC	shared
ACCTCGATTGCACTTGTCCCGAGAACAAAGT	shared
ACCTCGTTATGGATCCCGCACGCGAAATCAA	shared
CGTCGAATCTCGTTTCGTCGGACTGCCGCTC	shared
GCGCTCGACGACTCCGAACTGGACGAGGAAC	shared
ACCGCATCGTCGCGTTCGATATGCAGGTAGT	shared
AGCGATGCGTACAAGAACCCGACGAGCGCAC	shared
ACCCCACCACCGAAATTTCGGCCAAATCCAG	shared
ACTACGATGTTCGTGGGAACATCAAACAGAC	shared
CACCGAAGGTGCTACCCACACTGAACATCTA	shared
TACCGCGGTCGATTCGGACCCACGACTGCCC	shared
ATCAACAAGTGCCGACGCGAGTTCGACGGTC	shared
CGCCGGCGGCGCGTCGGTCAGCCGCCCCCAC	shared
AATGCAAGAAGTACGGGAGTCATAAAACGGA	shared
AGACACTCGGCGCTCGAGACGCGATCGTGAA	shared
ATGCATAACTCGAGGTGTAACGTGGGCGCAC	shared
ATTCGATCGGTCCGATCGATTCGAGTGGTTC	shared
AGAGGCGTCGAGCTGAGCGGTTTGGTGTCGC	shared
CTCAATCATGCTGAACGATGTACGCCACCAC	shared
AACGGCAACAGACGGTTGAGCGCTGGGTCCA	shared
ACCGAATCGGAAAACGCTTGGCGTCGAAAAA	shared
CACGGCGTCCACTGGGGAGATGTCCGGCTCG	shared
AAAGATGGAAATGATTGATACTCGAGTGGTC	shared
CGGTGTTGATGTTGGTCGAGAAACAAATTTC	shared
CAACAGAAGTCCCGCACAAAATAGTATCAGA	shared
ACCTCGCAAGTTTGCAATACCGACCGAGACG	shared
AAACCACTCACGTCTAACGCAACAACGTACG	shared
AATCAGAGTTTGAAGCAAAATTTGAACACAC	shared
TCGTGGCGTAGTTCGACGTCGTTCAGCTGTC	shared
AAGATGAGCAAGCGATCCCGCGAGGACGTGG	shared
CGTCACGACCGCAACCCCGAGAATGATAAGA	shared
AAACGCACGACGCTTGTATCGAGACGTTGTT	shared
ACAACAAGACGATCAAAAAGGTGATGATGTA	shared
TGTGATTTCTTGCCGATCGTCATCGGTAGTC	shared
TGAAGTGTAGCTCGACAGCTCGACCGAGAGC	shared
AGTAGAGGTTGAGGCTTTGCGACTGATCCAC	shared
TGCGCGAAACCTGTTGGTGCGAGAGTATCGC	shared
TAGACGAACATCTTTGCGCATCAGAGTAGCC	shared
CCGCAGCCCGCGGCACCGCGCGACCGCCGAC	shared
ACATCGAACACATTCGCGAGTGTCTCGACCA	shared
ATACACTCGTTCGACGCACACGCAGAGCGTC	shared
GCGCGCCTCGCTCATGATCCAATTTATGGAC	shared
AACTGGCGTGTGTCTTTGGGTTGCTTTTTTG	shared
ACTAAACTGTCGAGAACAGAAACGAGCAAAA	shared
CCAAATCCAGGCCGTGCTCGCGCGACAGCAA	shared
ACTACGTGGACTTTGTGATCGACCGAGCCGA	shared
CAGCCTTAGTAATGAAAGCTTGTGCGGTAAA	shared
CTCTACCAAGATCTTCCACTTGCCGCTCGGC	shared
CACCTTCTCACCTTTGCTCAATCTCACCATC	shared
CGACCTCGAAAGCAAGCGTGCGTATTTCGTC	shared
CTGACCAATTCCGCACGAAGAGACGCATCGA	shared
ACTTCCCGCCCGTTTGACGAGGGTTCAGCGG	shared
AAACTGATTTCATCTTTTTTAGAGTCGGTTC	shared
AAATCGGCGTCCCCGCAGCGCAGAAAGACTT	shared
CTTTTGTTTTGACTGATCGTTCTGCGCGTCG	shared
CCTCTTGTTTTTCGTGTCCGACCACCTCGAG	shared
CAAGTAGACCACGGTCTCGTTGAAAAGAGAC	shared
TCCGGTTTGATCACCGGCATGCGTGGGTCGA	shared
CACGGCGTCCATGCCGTACTCCTCGGCCAAG	shared
CAAGTAGACCAACAAGGCTAGATGCCGTGTG	shared
AGCGCTATATATTTCCCACGTCGATCGACCC	shared
CGTGTTCGTCCTCGTAGCGTAATCGGAAAAC	shared
CGTACACGTCGCGCAGGTTGCTAAAGGTATA	shared
ACGGGAGAAAGTCGACTCGTTGTACTCGATC	shared
TGCGGAGAGTGTGGTGTCGTCGGCGTCGTCC	shared
TGCCTCTTTTTGCGGCTTGTCGTCGCGGAAC	shared
ATCAATACAACATTGGATCGCGATACGAGTG	shared
AATGTACTCTGGGTCTAAAAATGAGCACACG	shared
CGATCCCGCGAGGACGTGGACGACTCGTCCG	shared
CGATCGGTCGTTATCCGGGTGTATAAAACGC	shared
ACGAAACAGCGATACAAGGCGGAGTCGACCA	shared
TACAGCGTGTTGTCCAAGCTCTTGAAAATAC	shared
AGAGTTGGAACACTTTGTCCGGTTAGATTCG	shared
CGAGTAAACCGAATAAAAACGACCTCGAACA	shared
AAACGAGTCGGTACAACACGGATCGTCTCGC	shared
CGCGCGCCGCCACCGTCGTTTTACGTCACCG	shared
ACTTTCGTGCCGATATTGCGACCCATGTCGT	shared
ATGAAGCTGATCTACTTGACGCTCGTCTCTC	shared
CCTGTACATTTATTAGAACAAACAATTATAC	shared
CGACGTACGATACGCACGACATACGAAACGA	shared
AAATCTTGCAGTCGATACTAGCCATGCAAGC	shared
CGACGCGGCGACACACCTTGCGTACGAGAGC	shared
ACGCATCCGAGCCACTGGACCACAAACGATC	shared
ATACGGTCAAGGACGAACCCCGAAGCGTGAG	shared
CTCACCGGGTCCGTAAACCTCGCCGACCAAA	shared
ATCTTAATAGTCTAAGCGAGGAGAAAACCTG	shared
TTACGAGCGCACCGCCGTACGGCTTGTTTAC	shared
CGCTATCACCTGCTACCACTTATCGAAGACG	shared
AACTAACCGGGCGATCAGCACTACCGGAAAC	shared
TCAATTACGAGAGGAAGAGATCTGTATGTTC	shared
ATGATTACAATCGAAACCGGACAACGATGAC	shared
ACATGGCCGCTATGGTAGCCGACTCCTCGCG	shared
AGTTGGGAATCGGAACCGTTGATAAAGTTGA	shared
TTCTTCATGACTCCAAACTACACGCACACAC	shared
TTTCTCGAAAAGCTGGCCGAGCTGCATCGGC	shared
CGACACACATCCGGTCGTTGTTTACGCGGTC	shared
ACTAGTACAAGGTGGAGCGCAGGAAATCTAG	shared
AACGGCAGTACACACCAAACAATTTGTTCGG	shared
CCGCGAGACTCGCGATTAGAACAAGTAGGAC	shared
CACCGAGACCCTCGTCCTCGTCGTCGCTAAA	shared
ATCGGAAGGATCGGGCGACTCGGCGTGCGGC	shared
TTTGGAGCTCGCATGGCAAGAGCGGCGTGTC	shared
AACGACCAACTCGAACAAACGATCGAAATAC	shared
ATGGTCTCGACACCGTTGGGACATCGGGACA	shared
ACACACTACACGCAACGATGAGTGCGAAAAA	shared
ACTACGACAATTACCAACTCTGTTTGGTGGA	shared
ATAACTTGTTGGCGATATAGGGATAGCGACC	shared
TTCGTGAACGACGGGTTCGACTGTTCGAACC	shared
AACAATAAAGTGTACCAAACGTGGTAACGTG	shared
ATGTTTCAACAAGGCAAAGACATCGAACACA	shared
TTTGTCGAATCGCATTCGTGTCACTGGACAC	shared
AACCACATGCTCTACTTTCTCATGAAGGAAG	shared
TCGGTTTCCTCTCGTTTTTCAAGATCATTTC	shared
GATCACGTGTTGTATATCGACCACATTTGAC	shared
CGCAGTAGGCGTTGTAGAGTTCGACGAGGAA	shared
TGACAAAGTTGGTCATGAATTTTACGCGGTC	shared
AATGTTCTGTTGCCTAATGACTACACCGTGT	shared
TCGGAAAGATCGGGATGACGGGCAGACCGAC	shared
TCGTTGCCACACGACTCCCGAATGAATAGTC	shared
TCATGCGGGACGAGTTGCGACTCGAAAACAA	shared
CGCCTTCCTACCTCGATTGCACTTGTCCCGA	shared
TCTCACGTTCACCGAGCTCCTGCAGTTGAAA	shared
AAAATATACTCACTAGACACATATGTGGGGT	shared
ACGAAGACTACCAAGAATTCCGCAGACTCGT	shared
TCTCAGGCCCACACGAAAAGCAGCGTCTTCC	shared
CAACTAGACCGACCTACCCGACCTACCCGAG	shared
ATCGAAATCTGAGCAAAGCCGTTTCCGACAT	shared
CAAAGAAGGCCAAGATGCATTTGAAGAAATC	shared
CGTGCAGCCAAACACTGGTCTACCGTTATTC	shared
TGGGACATCGTCATGATCCAGCGCACGAGCC	shared
GAACGGCGCGCAGAAGTACGACGCGCTCTAC	shared
GACCATATTGTCGAGTCGCGGTCTCGCTTCC	shared
CAAAAGGTTCGGGGGTTATCGCGCAATGTGA	shared
CGACTTCGACGCGCCGCAAGACGCGCAGCGC	shared
AAGCTGGATCGGCTGCACACGCTGTCTCGTC	shared
GCATATCGATCGTATTCACGTTCGTGCGACC	shared
ACCGAGGTGTGGTACGAGTTTCCAAGCGAGT	shared
CGGCGAGCAGATGTTTAACGTGGAACCACAC	shared
CTTCGTCCTCGTCGGAAAGATCCCGCGCAGA	shared
ATCGCCCGGTTAGTTGATACACGAGTGGGTA	shared
CGCCGATCTCGCAAATCAATGCAACGTGGCC	shared
ACGTCATAGAAGGTCTTGAGGTGCGTGAGTA	shared
AACATACAGAGATATCAAGTCCAACTACGCC	shared
CGAATACCGGAGTATTCGCTCACAGTCGGAC	shared
ACAAACTGTTCTCAAAATCTCCACGGTCCAT	shared
CAATCTTGGATTCGACGATTCGTCTGACGAG	shared
TGGTGGCGTACAACCGTATCCCAACTTTAGC	shared
GAGTGGCGAAGACGCGGGCGTTGTGGTCCGC	shared
TCTCCAAATCGGTGAGCCGTTTAGCGGTAGC	shared
CACGTATTCCTGCATTCAGGTGCGGGGCGTC	shared
CAGACAAAATAATTAAAAGTGTGACGAGTCG	shared
TCGAGATGAACGCGCTCGTTTCTTACGATCA	shared
AGCAGCAAACCAAGTTCGTCTCCGCCTCCAA	shared
CAAAAGTGGTTAACCAGCGCGATGGATCGTC	shared
CGTTGGACGCGCGTCTCGCAGTCCGTGCGTA	shared
TCTGAACTACATTGCGTTCACGAGTGACACC	shared
CTTGTTGTACAAGTGATATGATGTGGGCCCA	shared
ATAATGACCCGGATAACGACTTGTTGTACAA	shared
AACCGAGCTCACAGCAGATCCACATCTTGCG	shared
TGTACCCAACTCCGAACGAACGGAGGAGCCC	shared
TCCCGACATCTACGACATGTACAAACGACAA	shared
ATCCTCATCTTGCACCTCATCAACAGCTGAG	shared
CGTCGTCAACCAGCTACTCCGAATCCGAGTC	shared
ACATCTTTGTGAGAAAGCGCCCCCGCGAACT	shared
AGAAAACGAGCGTAATCGCGGTTCACGTTTA	shared
ACGGTTAGCAACATACCCAACGGAAGGAATG	shared
GATCCACGTGAGATTCTGTGTCGCGAGCGGC	shared
ACGCACGTTCTTGACATTGACGGTTTCTACG	shared
CTCGTCGTCCTCGCGATCGCTGGCGTCCAAG	shared
CTCCTCTTTTCGGGCTTTCTTCTTATCATTC	shared
ACCGCACCACGTGACCGCGCCGGATCGTGGG	shared
TCAACATCGGTACCATCATTCAAACTTTGGC	shared
CCGCACGTTTGCGCGTTTGCGCGTCCGCAGC	shared
ATGTCCGTCGTATTCTCGTAGGAGATTAACA	shared
ATCGTTTGAAAATACGACGACGTTCCATGTC	shared
GTGGGTCGGCTCTTGTGCCCGGCGCACCCAC	shared
CACTGATGGTCAGTAGGTAGCAGCTGGCCAA	shared
GCCGGACGCGCGGCGCAAGGTGTTTGCGGCC	shared
AGTAGATTGTAAATTTAATGGAATAAAAACC	shared
CGCCACCCGTAAAAGTGTGCGTTGGTCAAGC	shared
ACCAGCAGACACTCGGTGTAGCGTAGACGAA	shared
ATTACGCAAGTCGCGCCGCGGGATATACAAA	shared
GTAGGACTCTGGAGCGGGGTACACGGCGTCC	shared
CAGAAAGTCATCGGGCTCCTCCGTTCGTTCG	shared
ACCTCGCCGAACAACTCGAACGGATGCTCGT	shared
TGGGCAACTTGAACACCTCGAACAAGTTGTC	shared
TTGTACCATTTTCTCGTTTGGTGAAGCGGAC	shared
CGCCAGCGGGTCGATATCCTCCGCGGTCGGC	shared
TTTAGCGCGGCGACTCTACGCATGCACGAGC	shared
ACCAGCTTACGAACGTCTCCGGCGAACCGCT	shared
ACCGTTTGACTACCTTTATCAATTTTGCCAA	shared
TCGATGCCTGTACTCGGTGGCGCGTCGGTAC	shared
AGCCGAGTCTCGAAAATTGTGCAGCAGACTG	shared
CCATCATTATTTTTGGTATCGTGGTTCATGC	shared
ATTATCAGACGAGCGTTTGTCGGGCGGCAGC	shared
GAGCGCGTCACGTACCGCGGATTGTGTATGC	shared
AGTCGGAACATTGGTCGTAGTCGGAACTTTG	shared
AGCACGAGCAAAAAGACGATCATCCCGACCT	shared
ACGAAACCGACTTTCAGCCCGAATTTGACCG	shared
CGCAAAGAAGCCTCCTCGCTTGCATCAAACG	shared
TGCTTACCGTCGCCTACGACTCAATCCAATC	shared
ATCTCAGCGACACGTCCTCCGAGTCGGGATC	shared
AGTCGTTCGCGGGATCCACCTCCTAAGAGAG	shared
GAACAAATACAAGTAGGGCGCACGATACCGC	shared
TGTGTCGAACGAACTTTAGTGTTCACCGAGC	shared
GAGGTCATTTTTGATCGCAGTCCATTCGCCC	shared
ATCGATCACTAATTTAGAGGGACGAAAGCTC	shared
CGCGTAAAGCCGCGCGCAAGATGGTCGGTAC	shared
TTTCACGGTTCTGATTCTGCTCGGTCTTCTC	shared
GTAGGGAACGCCGCGCAGCCGTTCTGCGAAC	shared
TGGTCGAGAAGAACGTGAGGTAAACCGGCAC	shared
CCAACGCGGCGATCTCGTGGATGCGGATTCG	shared
AACGCCTACGAAAACAACAACAAAATCAGGA	shared
CGTTCCCAAGTCGAGGCGGTCCACCGAGTAC	shared
TTCGACCGCGAGGACGTGTACGACTACGACC	shared
CACCAACTTGACCTAGTTGATGGTGTTGTCC	shared
AAAACAAGTCGTTGTCGCGATGGGACAAAGT	shared
TGTTTTTACTCCTCTAAATTTACAAACTAAC	shared
CCCCGTCAAATACAACTGCAACAACAAAACC	shared
ATCTCTTTGATCCGCTTCGTCGACTGGTACT	shared
ATGCTGTTCTCCAAACGATCCGCTTGACCCG	shared
CGTGTCAAAAGGGAATGCGGTCAGCTCGTGC	shared
ATCGCAAGAACGTACCGACCATCTTGCGCGC	shared
CATTGGGGCGATCGGATCGTATAAACTCTCG	shared
CTCAACCAGATGGGCGGCTCGCTCACGCAAC	shared
GCCACTTGTACACTTGTTTGCTGATACGACC	shared
CGAACCGAGCGACGAGTACTTTTTGTTGCGC	shared
TCGTCGGACAACCGCGAAAACGAACGAGCTC	shared
CTACACGCACACACGCAGCGAACTCATCACA	shared
GCGATCAAACGCAAATCATATACTACCTCAC	shared
ACTGAACATGCTGCACTACCACTTTTTCCCG	shared
ATGCGCGTGGCGCCGCGGTGACAGTTGTCCC	shared
AATTCGACGCTCCACGATTCCGACGGAAACG	shared
ACGACGACCAGGCCCTTAAGAACATTAACAC	shared
AAACGCTCCGAATGTCGACTGAGAGTTCGGT	shared
ACCACCGGAACGCCCGATCGACGAAACCCGC	shared
AACAGCGAGAAGATGCTTATGTACTCGTCGG	shared
ATGACGAACCGAAGAATCGATCGACGTCGTG	shared
TCCCACAATTTACTTGACCACTCCTGTCCGC	shared
CACGCGCTGTGGGACATCGTCATGATCCAGC	shared
TGGTGATGGTGGACGACTCTGGTTCATACTC	shared
CCGATAAATTCCTCGAGACCGCGGTCGGCAG	shared
TCTGATCGAGCTGGACTCGGTCCCCTCGATC	shared
ACAGTTGTTGCACGCGGACTCGGAGTACGTC	shared
AAACACTCCCTGTACATTTATTAGAACAAAC	shared
AACAGAACATTTGCATTCGATCGATTAGCTT	shared
ACGACGACGAGGACGACGACGAGGAGGAGAG	shared
TGTTCGTCGCGCAATATGATTTCCAAGGGAC	shared
CAAACAGTACGTACGAGGCTCTATCGTTGAA	shared
TCGATGTACCGGGGTACGCGCTTCGCCCCGC	shared
AACGAATCGGACGTTGACTACATTTTTGACC	shared
GATGGCCAAACAGAAACTCAAAGGTGTATAC	shared
CTGCGACGCATGTATTGATCGCGCCGCGGCA	shared
CTGGATGGACCAAGGTTGTGCACGAACACGC	shared
ACGTCGGAACGACAGCAAAGACCGAAAAATC	shared
ACGTGTGTACAGCTTTAACGCACTGACCGAC	shared
TAGGCGAACAGTGTTGTGATCACTTCTATGC	shared
TGAACATGGGTAACGCAAGCTCCGGGGCGCA	shared
TGACTCGTGTCGCCTACTTCGTTCTCGTGTC	shared
CGCCTCTCGACCCCGTGTCCGACAACTCGTC	shared
AACTCCTCGTGAACGCAACGAGGTCGGACAT	shared
TATGGATCTTTGCGCAGCCTGCAACATGGAA	shared
GCGGATTGATAAACTCAATATCAAGGACAAC	shared
CAGCCCGTCCGGAATCCTATTTGCCGCCCGA	shared
CACGAACACGCTGAAGCCCTCGTGGTTGGCG	shared
AGCAAGTGTTGGGTAGTACGTACGCGTTATA	shared
AACCCTGGCGGTGGACGAATACGACGTGCCT	shared
GGTCACCTTCTCACCTTTGCTCAATCTCACC	shared
AAACGTAGTGACCCAAGGTTGTGACTGTGGG	shared
TGACGGATACAACGACTGCAAAACTCCGGAC	shared
CGAGCAGTCCCAATCCCTCGCTGACCATCAC	shared
CGACCGTGGACAGCGGGACCGGGTGTCGAGC	shared
CCGGGCAGTTCAACTATGTTCTCGCGTCGGA	shared
CGTACTGCCGCGCGTTCGCCAAAGACTTGAC	shared
CAGCAGACCAACGTGACGGTTGTACTCAATC	shared
TACGTAATTTGAGTGATTATTCTTCTCAAGA	shared
GATGAGCTCGAACAGACGACGAAACGTCGGC	shared
AACTCGCCGTACTACCACTCGGTCTTCTTCA	shared
CAAACTTACGTAACCATTCTGCTCATCCAAG	shared
AAGCCAATACGATGAAACTGGATCTCTTGCG	shared
CCGAGGAAACAACTGAACGATCGTCGGAACG	shared
CGTCGCCGTCGCCGCGGCCTCGTCGTCGCCG	shared
CACGCTGAACTGCGCTCGTTCCGGGATGACG	shared
ACAACCGGAAATGTGAACAAACTGGTCGTGA	shared
GACTTTATTGCAATATTTTATTTAGCTCGCC	shared
AACCGGACAAAGTGTTCCAACTCTACAACTC	shared
CTTGGGCGACCGCAGCCGCTTGACCAACTCC	shared
TTTTTGCGTTTTCTTCTGAGCGACCTGTTCA	shared
CAACGACAACGAGGCCGGCGTGGACGCGCTG	shared
TAGAGACGCCCCCCAGAATCTCGAACTCACA	shared
CTTGCCGATCGTCATCGGTAGTCGACTCGAC	shared
TCGAGTCCAGGTCACGTAACCCGGACTTTAA	shared
GTCCATGTACGTCAATTGTTACGTTCCCGAC	shared
ACATAGCGACGCGCGACGTGTGCGGAGTACG	shared
AACCGTATCGCTCACGTTGTCGGTGGTAGTC	shared
AACTTGGTGAGTAAACTCTCTACCGACAAAC	shared
TCAAAGAAGTTGGTTCTCCCATCCAACGAGA	shared
ACAAAAAAGCAACCCAAAGACACACGCCAGT	shared
CGTGATCCAGGACTCGGCTGAGATATGGGGA	shared
TCGACGTCTGACAAAACTAATACCAAGTCCA	shared
ATAACCCCCGAACCTTTTGCACACGATGCCA	shared
ACTCATGTCGACACATCGACAATTGCGCGCG	shared
ATGATCACGGTAAAGGTAATCACAGTGGCGG	shared
AATTTGGATTCGATTTCGGTATCGACGGTTG	shared
ACGTCGTTTAACCACCGTGTAAACGCGTCCA	shared
TACAACACGGATCGTCTCGCCGCTCGCCAAC	shared
AACTTTCAGTATTGAAAATTTGTCTGGAATC	shared
TCCGCTTCCGGTGTAGCTCGTGGAGATCATC	shared
TGCGGGCTATCGTGTGCGCACCGGAGCGAAC	shared
TTGCGTGTTTCGCTTGTCGCACAAGCATTAC	shared
TTTGATGCGACTGTTGCTCATCTCGCCAAAC	shared
CAAACGGTTCGGTGCATTCTTTGCACGCGTG	shared
CGGTTTCTCTTCCGCCACCGTCGCCGTCTCA	shared
AGTCCTTGTTGAACGACCCATCTACCGTCCA	shared
TTAACAAATTAGTTCATATCAACCGCTTATC	shared
ATGATCCAGCGCACGAGCCACCGTCTCGCAA	shared
CCGCGTGTTCACTTCGAATAAGGGTAGCTAC	shared
AGCGCGTTGATCGCGGACGGGAAACACTTGA	shared
CAAACTGTCGAACATGTGCACGACCGTGGAC	shared
CGAGCATCATCGATTTTTGCCCGCATCTGGC	shared
CAGTCGTACATAATCACAGCACCCTTGACGG	shared
ATACGGAGCAGGAGTCAAATCACACCGAACT	shared
TAGCAACTCTGGGGCTAACGAGACACTAGCC	shared
TCTGAGATCACTTACAGACACCGAGCTCGCC	shared
TTGTTTGTAAGATGATGCGAATTCTTCAGAC	shared
TCGAACGACGGCCGACACTCGCTTTAAAACC	shared
AGTGACAACAATTTGGGCGCTGCTCTCGTAC	shared
AAAGTTCCTCGCCAGGTCTTTAACGATCCAC	shared
AAGCATGTTGTTCAACTTGCAAAATTGTCGC	shared
CGAAATGCTGTCGGTTAGAGGGAACACTGAA	shared
CTAATACCACAACCAAATCGAAACGTAAGAA	shared
ACCGTCGCCTACGACTCAATCCAATCGACCG	shared
CACACCTCGTGGCTTTTATACTGCCGATCGC	shared
TACGATCGTTCCGCATATCGATCGTATTCAC	shared
TCGCTAACGAACCTCTTATTCCGACAATCAA	shared
AACGATCAAACGGACAAAAGAGGTTAGTCTG	shared
CGAGCAGCAGTACCAGCGCGAGTACCGGGAC	shared
TCAGTCGACAGTCGAGATGCGGATTCCACTC	shared
AGAACTTTTTGTTCAAGCGACTCGCCGATAA	shared
ACCAAGTTGAAGGCTTTCAAAGGACTGTCGA	shared
CGGAAAGATCCCGCGCAGAGTGGGCAGCTGA	shared
ACTCAAGCTCGATCCGATCGCCACTCCCAGT	shared
ACAACCGTTCGTCATGTATATCCGACAAGCA	shared
AACGTGTCGACCAGCACGCACAGAAACAAGC	shared
CTGGAATCGGTTCTCCCCACAAGTCAGCCAC	shared
TTGTCGGCAAGTTAAGAAACACGAGATCAAC	shared
CGCACTCGTAGTAGAGTTAGAGACTGTAACA	shared
AAACAACTTATACAAACGGAACATACAGAGA	shared
TCGAGGCCGTCATACACTTGCACGTTTCGTC	shared
TCATGTCCGGACCGTTCGATGGTTGGGTCGA	shared
ACGTTTTGCCTCGATACTACGAATATACTTG	shared
ATATCGTTTGATATCTTTGGTCTCCCCTTCT	shared
TCACTACAACCAGTGGAGCGATCGGTATTAC	shared
AAAGCGAAGCGGAACCAGTCTGCTTCTTTGA	shared
GGACCGACATGGGTTTCGTTTTGAGTGTACC	shared
CTCGCGTAGACGGCGGTGAAGACGATTTTGA	shared
CGCAAGCTGGACCGGCGATATCGCGAAGTAA	shared
CGACTCGAAAAACTGCCGCTCGAAAACCCGC	shared
TACAGTGGACATTATAGTGGACCGGGCTCGC	shared
CAATCCCCTCAACCAGGACCCTCTGGATGGA	shared
CGTGGCATGACGCCCGACCGCCTGCCGACCG	shared
AGTGATGTGTTTATTACACACGTTGCAATAA	shared
TTGCCAACACGATCACGCACGAACTCGGTCA	shared
TTCTTTCGAGTCGTACTTTTCTCGAACGTTC	shared
ACGCCGGCGGATGGAGCGGGAGATGGCGCGG	shared
ACACATGTAGTCACGGTGGCCAAGTTTTTCT	shared
CAGGCCGGTTCTACCCATTCATCTACACCCA	shared
CGTCTGGTTAGCGAGACTACTCATCAACACG	shared
TCAGCAAGTGGTTCTCGAGGTTGTGCACCAC	shared
ATGCGGTATACGGAAAAGTGAAGTAGTTTGG	shared
GTCCTTCTGGTAGCTGGACTCGCTTGGAAAC	shared
AACCGAGCTACTCTGATCGAACAGAAACAGT	shared
CTCCTCAGTAAGGTAATATTGTTTCATCGGA	shared
CTGCGTGCTGCAAGTAATCTGGTTTTAATCG	shared
TTAGCTAGTGATAATACTAGATTTTACAGTC	shared
GTACACGGTATTTCGGTCGAGCGCTACGTCC	shared
ACAGTACTTTCCGGGACGGACGTTTGCAATC	shared
CCGATTTGTTGGAACAGGAATCCGCGCATGA	shared
TTCTCGATCGCGCGATGGCGGCGAGCTACGC	shared
CGTGCGGTGCAAGTGGTCCGCTTATCGGTTC	shared
CATCGAATACACACCTTCGCTCGAGGACTGG	shared
TGATTTGACTCCTGCTCCGTATTATTTGGTC	shared
TCGCTACCCAACGCGAAGAGGGAGCAAGCGC	shared
CCGTTCCGGCTCCGGCTCCGGCTCCGGGTGC	shared
TCACACTCACTTGACGAACAACAGTCTCGAC	shared
GACATCGCCAGCGCCGAGGAACGAGACTAAC	shared
ATATCAAAAATCCGAGACTCGTTGCATACAC	shared
CAGACGGTCAATCAGACGGATACGACGTTAG	shared
AATCCAGTCGAGCCAGTTGATCCAATCGAGC	shared
CAACTTGTTCGAGGTGTTCAAGTTGCCCAGC	shared
CTCTCGAGATGGAGAACCGAATGACGGATCG	shared
AGCGTGGGGTCGATGCGCCGTTTCTTCGGAG	shared
CGATCTTGGAGGTCGCGCGTGGAACCTTGAC	shared
TCTTTCTAGCCCAGGCAAAGAGACTGTTGCC	shared
TTGGTTATTCGGTTGCATCTCTGAGCGAGCA	shared
AACATACGAGTTTACTACGCACATCGTGCGA	shared
CTGTGTAGCGGCGAGCAATGTTCCAAACCAA	shared
AACGAACCGGCAAGTCGCGATCGTCGTACCG	shared
AAGTAATCTGGTTTTAATCGGCGATCGGCAT	shared
AACCAAACAGCGATCCCTACGAGGGAACCGC	shared
ACCATCAAGTTAATTGCCATGTTAAACACTC	shared
CTAGTAACACCAAGTCAAATCCAACCCGAAA	shared
CGTGCTGTTGATTGACCGTGGTAGCTTCGAC	shared
AACTTCAAAGTGTTGCGATCGCTCGACTCGC	shared
GAACCGCTGCTGCCCCGTGAGACGAACCACC	shared
CGATGTGTCATGCTCAGTCATGTTTGTCGTA	shared
CTGTCCAAACGAGTTCGTGGTCAAACTGCCC	shared
ACTACGGTTCGCCACAATGCTGGTCCTCCCG	shared
CTCGTAATCGTCGTACGTAATCCAGAAGACG	shared
CGCATACAGCTGACGATTGTAATGGTGGTAC	shared
ATAAGTTTATCGGCTCGACCTCTGGTGTAAC	shared
TTTCGGTAAATTTAAGTGAACGATACGAGTC	shared
CTTATGGCGAAGTCTACGACCTCGCTGATTC	shared
AAGCCGGTACAAACGAAAATTGGATTCCACT	shared
GCGCGGTTTTCTCAAGACTATTCTGGCCGAC	shared
TACCGCGTCTTTCGCCCAAAAGTGTCGAGAA	shared
AGGACTACATTGATCTAGGCAGCAACGACGC	shared
CAGCATATCCTCATTGTATTTGTCCACGAGC	shared
CCAAATCGTTGTGCACGAGAAACTGAAGCAC	shared
CAAAACGGTGACGACCGCCACGTTGTTCACG	shared
CTTGCGACGACTCTCCAACTCGTAACGAGAC	shared
CTGCTGAAAGATCTGGACAGCGAGCCGCTCG	shared
TGGTACCGCGAATACACGCGCGCGACAAGTC	shared
CATCAACCGGCAGTACAACTGGTCGATCAAG	shared
CGAGGACGCGACGCCGAGAACGCGAACGACG	shared
AGCTTTTATTTGGTGATTTATCGAATGTAAA	shared
CGGGCGATTGCCGCGGGCGACTCGGGCTGAC	shared
AGTCTACCGACCGGACCGTGCTACTCCAACT	shared
GATCGACGGCGACTTGAACTGCATACAAATC	shared
TGTTATTGTTGGACTCGACCATAGCGGCAGC	shared
CCGCGCGGCCGGCCGACGGAGGTGTTGGTCC	shared
CCAAGAACACCTCATGGCGCGGCGATTCAAC	shared
TACCACAATACTTGCGAACCAAGTAGACCAA	shared
AAAACTCCTCGTGAACGCAACGAGGTCGGAC	shared
CCAAGAGGTACAGCTTCCACGTGTCGTTAGC	shared
CGGGCGAACACATGTGCTTTCCGTGCGTCTC	shared
ACCGTACGATTTTATCTTTATAATCTCTTAA	shared
CCAACCACGACTGTGGGTCGGTCGTGTTCGA	shared
AAATCTACGAACATTGTCGCAACATTGATAC	shared
ATCAAGCGGGACAACATGTTCTGCGGAACGA	shared
ATTCGAACGTAAGAACGCGACGAAAACGATG	shared
CAACAAAGAGATAAAAATGAGATAACAGAAC	shared
CTGCCGACCGTTGCTATGTCGTAATCGCCAA	shared
GAGCGGTATGAACATGGGTAACGCAAGCTCC	shared
ACGAACTCGAACTAGTGGTGGTACTCTCGTC	shared
CCGTGACACTGACGCTCTGCGTGTGCGTCGA	shared
AAACCGTTCCAACTAGAGCCGAACCAGAATG	shared
ACATGAGTTGTCCAGACTTCCTATCCAAACA	shared
TGAAAAAGATGGCCGACCTCGAGCACGACTC	shared
TAGCCGACTCCTCGCGACCCGACTACGGTGC	shared
TACGCTCGACATGCACTTGCTCGACTTGCAA	shared
AAACCGCTCGACTTCAATAACGTGATGAGCA	shared
CATACGACATGGAACGTCGTCGTATTTTCAA	shared
ACGACAACGTGAGCAGCATTCACATTGTGGG	shared
TCCACAACGATTTGAGGGCTTTCGTGTCGAA	shared
CCGTCCGACCACGACAGCGGTGTCGACGAAA	shared
TGCGGTCATGATTAGGATGAGCAACGTAATC	shared
CGATAGCACTCTCGATCGAACTCTCGATCGA	shared
CTCGTCCAGTTGGACCGCATACACAATCCGC	shared
CAGAAACGGCAACAGACGGTTGAGCGCTGGG	shared
TGCATTCCCGATATGTTCATTGGTACATTCC	shared
TACACAAACGATTCAAACAGAACAAACTCAC	shared
CGAGATAATAACCGGGTAATAACGATAATGA	shared
TAACGAGACACTAGCCGTACATACTTGATTC	shared
AGACGGGTTCGCGCCACGTGTACCTCATGTC	shared
CATTACCCGCTTGGATTTTCTGACTCGTGTC	shared
CCAATGCAAGAAGTACGGGAGTCATAAAACG	shared
CCGCGAACGATCACGCTGGTACGATTCTCGA	shared
ACAAGACACAAGCGGGGATAGCCTCGCTGCG	shared
AGACGGTGCTCGAAAACGGTCGACGCGTGTA	shared
CTGCTGCACAATTTTCGAGACTCGGCTCAGC	shared
AAAGGCTATCGCCAGCTCCTCGTCCAAGTTG	shared
ACTCACCAGCTCGTGAAATTTGTTTCTCGAC	shared
CTTGAGTGGACATTTGCGTATCGAGTTTTCG	shared
TAACTGTCAACCTTGTAAAACGGTATAAAAC	shared
CAGCCATTCTTAAAACGTATGTTATCCAAAA	shared
CCTTTGACGAGGTAGATGTGAGCCAAGTTAG	shared
CCGTTATCTCACGACGTCGCACTCGGTTCGC	shared
ACGAGTCCAGCTCGTCCGCGTTGCTGTTGAG	shared
TCTCGTTCAACCCGCTTCGACTTCTCGACCC	shared
TCTACATTCGGCTCGTTGGGTCGAGAAACGA	shared
AAAGTCAAAACTTTCGTGCCGATATTGCGAC	shared
AACCAAGCATGCAATTGAAAAAAAGAACCGC	shared
AACGACGACGAAACGTGTCTTAGTAGAGTCG	shared
CTTGTTCCAGAACATTTCTGCTGCTCATTTC	shared
ACAACAAGCGCCACAGCAAGTCCCGCGATGA	shared
TTTGTGCGACAACGCATCGCGAACCGAGTGC	shared
ATAGAGAGGCTGGCTCACCTAGTTCTGCTGC	shared
TCGATAGATGGTCACCTTCTCACCTTTGCTC	shared
TTGAACACGCATTTGCACATGTTCTGCGAGC	shared
GCACACGCTGATCGAACTCGACGAAAAGGAC	shared
ATACCCGACCACGTAAGAAGAGCTCAACAAC	shared
AACCAAGAAGGCGTCAACAAGGCGACAACGT	shared
CGACGAGATACGTCCGCGATTCGATTCAACA	shared
TGAGCGCGAATTTGTCAGCGGGGTGGGTATC	shared
CGTTATTCGACGGCCTCGACTCTTCGTCTCC	shared
AACTGATTTCATCTTTTTTAGAGTCGGTTCG	shared
ATTGATAGCATAGCATGATCGGTGTTACAAA	shared
CATCCGCTTCGGACTCGAAAAGAAGCGGCCC	shared
TCGGGCGAGCGACGTGATCGTGGCGAACAAC	shared
ATGGGAGATGCCGCAACGATTGTTGGTCGAC	shared
CATCATGGACGAACACGTTCTTCGCATGTGC	shared
TCTGGAATCGGTTCTCCCCACAAGTCAGCCA	shared
CAACAACATCGCGCTGTTCAACGACTCGCGC	shared
TCGGCACTGATGACCACGAGCAAGTCGTCCA	shared
ACGACCGACTCGAACAAAGAGTATCAGGAGC	shared
CGAATCGGAAAACGCTTGGCGTCGAAAAAAA	shared
ACAGCGAGAACTCGATCAGCACAGAGGTTGC	shared
AAACGTAGAAACGAACACTATTACTCAAATT	shared
ATCACGCCGAGAGTTGAACACGTCGAGCACG	shared
CGAGCGGTAGCGAGAACGACGACGCCGACGA	shared
ACGTTGCGTGGAATCGACGACCACCGTGTCC	shared
CGATCACCGGCTCGTTCGTTCGCTCTACCGA	shared
CAACGGTAAGACCCTCGTGCTAGACTGCACC	shared
AAGTCGGTTGTCCGAACGGTGCGACGATGGC	shared
CGTGTGTCTTTGGGTTGCTTTTTTGTCTTTA	shared
AGCAAATTGTTCAGATTTTTAATTTCGGTAG	shared
GTCCACGGAGCCGGCGCCGCTACCGCTGCCC	shared
AACAAGATGAGGACCGCGAGGACGAAGAACA	shared
AAACGGTGAGCGTTGCGAGTCGGGAATGTTG	shared
AATCAACGACTGGGATTTCATCGAGCCCGAG	shared
ATGCTATTGATATGCTCGTAGTTCAAGTGGG	shared
CGCGTATTCTGGATCGGAACCGCGACACCAA	shared
GGAACACTTGCGCAAGATTAAACAACTAGCC	shared
TGGCCAGACCGATCAACGATTTCTGCATTGC	shared
CATTCGTATATCCGATTACTTCGCGATATCG	shared
CTCACGCACCTCAAGACCTTCTATGACGTCG	shared
AAGCGGTTTAGTCATGTCCACTTCCAGATAG	shared
TAAGAAGTTTGCGCAGTTCGAACGGTTCAGC	shared
GAGTTCCGCTGATATGTCGCGCACGGTGTGC	shared
CGTCGTCGATTTCGTTGAGCTCGCTGATGTC	shared
TAAACAACGACCGGATGTGTGTCGAAACCGA	shared
TAGCGACCAACGGTTTCGCCGTGTCGCCCAC	shared
TTTCGCGCGGTTCCAACGTCGACACTCGGTC	shared
GTAGTTTGGAGTCATGAAGAATGCTAGTTCC	shared
CATGTCACGCGAGTACTCGCCGTTCGACAAG	shared
CAACGGAGACGATGGAACGGACGGAGGAGAC	shared
ATGTGGCCCGACGAGATCCTGCGACCTTGCG	shared
AATCGAGTGTCCGAAACGCGAGTGCTCGAAG	shared
ATAGCGTGATATCCATGTGACCAATGATGAA	shared
CCAGCGGCGCTGGCAGGAGATTGGTCCGCAG	shared
TCGATCGAAATCTGAGCAAAGCCGTTTCCGA	shared
GTCCAGCTTGCGGTTCGCTACGTGTCGCAAC	shared
CGATGGCGCGGACGCCGCGACCGTTTCTCGC	shared
ACACTTACTCCAATTAATTGCATATCGACCA	shared
CTCGAGCGCCGAGTGTCTTGCGGAATGCTTC	shared
AGCTGGAAACCGGAATGCCGTTCCTATTGCA	shared
GAACCGAGTGCGACGTCGTGAGATAACGGTC	shared
CGGTTCGAAAAGATATTAAACGCACACAACC	shared
CACGAGAGAATACGGGTTGGAGATGCCGACC	shared
CTACCGCATTCTAGAACGGATGCACAAACTC	shared
CGAGACCTTTGGTGGATCGTTTGCGGTAACG	shared
AGCAGGTGATAGCGATTCACGTTCGAGAAGA	shared
GCGCGTATGGCAGAGTTTATGTCGGTGCTAC	shared
AACACGCGAACCGAATTGGACCGACGTATGG	shared
AAAGCTGCCGCTAAACAACAGTCCTTCGACC	shared
AAGCCAAGGACGACGATGCACCGTCCAAACG	shared
CGAGCCGACCCGGGAACCAGATGGACTCGCA	shared
ACCGACTGTTGAGTGCTTTCCTCCGACGTAG	shared
AGCCGAAAAGCGTCATCCCGGAACGAGCGCA	shared
AAAATCAGGACCGGCTGGCCCGCGAGACCGG	shared
AATGTATATGCGTCGGTCGCGCAGTTCGATG	shared
ACATTCGATCGAACGACACTCGACCCAACCA	shared
GTACGAACTTATTAATCGTGCGTTGTCCCAC	shared
CCGTGACGCTTGTGCAGCTCACGCCCGCGGC	shared
TTCGAACCTCTACGTCAACACAAAAACGTCA	shared
TCGAGCAACCCACTGGCGCGCAACCATTTAC	shared
TCCCGACTGATCAGTTCGTTACTAAAGGTCA	shared
CGGGCTGACGCGATCGACGACGCGACTCGGC	shared
ACGTAATCAGTATTCTGATCGTCTTCTGTGC	shared
ATTTTATACGGGAATTTCATATGGAAAAGAA	shared
AACGAGCTGATGGTCGAGTCCAGGTCACGTA	shared
AGGAACCTATTGCCCACAATACCGCTTATAC	shared
CCCAAATTTCGCTTTCGTTAAGTTCGGTTTC	shared
ACAGTCTTTGTCGCAGTTATCGTTGCAACCG	shared
ATGGTAATCTGCAGATACCGCGCGGCTTGCG	shared
ACTGACTACGTCGTCTCACTACCGCACCGAA	shared
TACCGAAGAGAAAGTCAATCGAACCGACCAA	shared
ACTCGGCGAGAAGACTCGACACCTTGACATA	shared
CGTTCGTCCCTTTTTGGCAGTACGAGTCTGA	shared
TAAAATGGAGCGAACGAAACAACAAAACGAC	shared
ACCCGACCACGTAAGAAGAGCTCAACAACGA	shared
TCATCGTGTCGACTGTGGTTGCGGATCGTGC	shared
AGTCAGAAAATCCAAGCGGGTAATGATCAAA	shared
CGACTGGGATTTCATCGAGCCCGAGAAGCGC	shared
AAACATTGGCGTGTCGTCACTGCTACAATGT	shared
CGCATTTTTTGGCGAAACAACGTCTCGCTGA	shared
AAACAACAACCGACCGTAGAGCAGCGTCCAC	shared
ACGACGATCCCAATGGTCACGATCGAACCAA	shared
CACAGAGATGTCCCTCTTCTCGCAGCTAGTA	shared
TATGGCCAAACGCAAGTACAAAGATAAGAAC	shared
CATTTGAAGAAATCGCGTTCATGGCTAGATA	shared
ATTGCGATTGCGACGGTTGTTACGAGGAACG	shared
ATGAGTGTTGTCCGATCCGTCATTCGGTTCT	shared
TGGGAATCGGAACCGTTGATAAAGTTGACGC	shared
CCTCAACCAGGACCCTCTGGATGGAAACCGG	shared
GAAGTGAGTTTGGCGAACGCGATTTGTCACC	shared
AGATGAACATGCTCTTCTACGCGGAAGTACG	shared
CGGTCGGTCGATCCACTTTGGAGGCGGAGAC	shared
AGACCTTCAAAAACATTGGTGAGATGAGCAC	shared
GATCGAGTTCTCGCTGTACGCCTCGCTCTAC	shared
CGAGTCGCCCGAGATCGTGCTGAACGCGCAC	shared
CAGGTCGAGGTCTAGGTCGCGCTGTCCCCCA	shared
GAGTCGCGCTATCGGCGAATCGGACTTGACC	shared
AATGTAACGCATTTCCACTGGGTCCCAAATG	shared
AATCCGCTCAACCGATATAGCGTCGGGCCGT	shared
ACGAGAGTACCACCACTAGTTCGAGTTCGTC	shared
TAGGCGTTGTAGAGTTCGACGAGGAAAACGA	shared
CACCCGCATCTTTGGTGGTGGGCGGCCGCAC	shared
ACGACCGTCGTGCTATGCGATTCCAAGATGG	shared
TGTACGATAAAGGTCTGAAAGACATGCTCGC	shared
CTCCTCGAGCCTCTTTTGTTCTTCGTAGCGA	shared
ATCGGCTTGCTGATATGGTGGTTCGTCTCAC	shared
TTCGCGTTGTTTTTCATCAACTCTTCGCGCA	shared
AACCCAACAACATAAAGCAGCTACCCAATAT	shared
TCAAAATGTGGTAATTCGGGATCGAGCGAAC	shared
CCAGGCGTGCCGAGTATGAACCAGAGTCGTC	shared
ACTGATGGTCAGTAGGTAGCAGCTGGCCAAG	shared
AGTGCAGCATGTTCAGTATTTTCGGAGCCGA	shared
ATATTGTTCCACGATACGGTCGCATTAGCGG	shared
ATTAAGATGGTCATTCGAGATATGTTTTTCG	shared
AAAAGTCGATTGGCAGATCAATCACGTACAA	shared
ATACGACCAAATACACTACAGCAAATGTCGA	shared
AATGTGAAGATGATGATCACCACGATAGCGA	shared
AAGAAATTCCCGCAAACGTGGTAAACGTGAA	shared
ACAAGCCTCACGTGTGTACAGCTTTAACGCA	shared
CCGGTCCGACGTGTACGTCGATCTGCGAAAC	shared
ACTTGTCGAACATACAGATCTCTTCCTCTCG	shared
CACGTGTCGCCGCGCTCAAAGTCGACCACAA	shared
CGACCGAATCGCCGGTCGGTGCGACGAACAC	shared
CAACTTTGTGCAGTTGGTGTGTACAGTTTGC	shared
TAACGTCGAACGTAACGGCGACCTCGATAAC	shared
TTTCTATTTCAGTTTAGTTGGTTAGTTCTCA	shared
ACTCGTACGGTGACGAACAACAATGGCCGTA	shared
CGGGCGAGATGGGCTCGGTCGGTCGATCCAC	shared
TATCGAAACTACAAGAAAGAGTTGTGTGCAC	shared
AGAACGACAACAAGCATCGCGCGAACAAATA	shared
AAGTTTATCGGCTCGACCTCTGGTGTAACGG	shared
ACGAGCGTGGCTTCGACATCGCCAGCGCCGA	shared
ACGCATCAATTTACAAGATGGACGTCCGTAT	shared
CCCGCTCAATTGTGGTTCATTTTCGCAATGA	shared
ATGCTCAACGAGTTCATGGTGGGTCGGACTC	shared
ATTACCAATACAGAAATTAGCGATATCGATA	shared
ACAACACCTAAATCGAAGCAGACCAAAAAGT	shared
AGATTCTCCGACTGGTTCGAGTTTCCTTCGA	shared
CTTGGGTAAGTAATGATACGCATGTTTATAC	shared
CCACCGTGGTGAAGCTCACGCGAGTCGCGAG	shared
CGACCCGGAGCACGTCGTGATCCAGGACTCG	shared
CTTAATATATTTTTGAGGTTAGTACGGAACG	shared
GAACTACAGCGACCGACGAGCCACTCGCGTC	shared
ATTCGGGATCGAGCGAACCAGCTCCCGCGAG	shared
TGGTCATAACTGGTCTTACTGGCATTCTGAC	shared
AGCCCTCATTGTGCAATAACGACTTGTCGGA	shared
CGTGCGTTTATGTGGTCTTTGTGCAATAGGA	shared
ACTCACTTATCGCGACGAGCGAGCCATGTTG	shared
TACCTACTGACCATCAGTGAAGACAGTATCC	shared
ACGTTCATGGCCAAACACGTGGACCCAGCGC	shared
AGATTAAACCAAATGGAAGGAGTAAGGTAAA	shared
CACAAGCCTCACGTGTGTACAGCTTTAACGC	shared
AGAATGCGGTAGAGCGAGTCTTCGAGTGGCG	shared
GCTCTGCGTTTGTGAGACGTTGCGCGGTACC	shared
AACACTATCGATTTTACTGATAAAACGAATA	shared
TTATTGAGTAACTTGGCCAACATTTCGAAAA	shared
AAGTGGCCCAGTTTTGGACCATGGAGGAGAT	shared
AAATGCCTCGCAAAGCCAGCTCATCACGGTC	shared
CCGACCCGGTACTCAGTCGTTTGTCTACACC	shared
CATTGTAAGTTACCGCCGCACCGCCTCCAAA	shared
CTTGACACCAGTGGTGAGCACGATGAGCGTC	shared
AGCTCGTGGAGATCATCGCCGCCATCTTTTG	shared
CCTACATACCAAAAACGAACGTGTCGAAATC	shared
CCATAATGTTCAAACTGTCGAACATGTGCAC	shared
CAAGAGCCTGGACCATCAAACGCTCTAGAGC	shared
ACGATAAACTCTGGGCTATCTCGCTCAAGTG	shared
TCCACGAGAAAATCTGCGGCCAGATGGACAC	shared
AGAATCGTTGGAATCGTCGTGATGGTCCGGA	shared
TATGAACTAATTTGTTAATAGGATTGCTCTA	shared
AAGCTGAGCTTGCGACTGGTAGTCAGATCCT	shared
ACCTGCCGACCGCGGTCTCGAGGAATTTATC	shared
GACGAGCGTTTGTCGGGCGGCAGCGATCTCC	shared
CCCGTTCGAACAGCCAATCCTGTACAGCGAG	shared
TAAAGGAAAATCGAACTGGAGAGGGAGTTGA	shared
GTACGATTTTATCTTTATAATCTCTTAATAC	shared
AAAGATACACAGCGACTTCACGCGCAAATAC	shared
AAGTTGTACGACGATGCTTTTCGCGGCGATC	shared
ACCTTGGTCGAGCTGTGGTCGAGACACTCGC	shared
AACTTCTTCCTCATCTTGTTCGGCTTCCTCA	shared
CGCATCTCGACTGTCGACTGAAAGGGACGAC	shared
TCTGGTCCTCGGGCACGTTGTTCTCTCGACA	shared
ATACTGGTAGTTGCCCGACGATACGTACTTC	shared
CGATATTACGATGAGCTCGAACAGACGACGA	shared
CCGCGAAAGAATCTGATCGTCCCGACGGACG	shared
ATCACCGACATCACCCGTCACTTCTCGCCGG	shared
CCTATCAAATGTGTCAAACACGCGCCAAACA	shared
CGCTGCCGCCCGACAAACGCTCGTCTGATAA	shared
TTTGATCGTTTGCGTTTGTCTCGTTTCCGTC	shared
GAAACCAAGTGGCTGTTTTCCATGGGACAGC	shared
ACCGTCAATGTCAAGAACGTGCGTCACGTCG	shared
AACGACTCGTCGACCTCCTCACCGACCGGCT	shared
CACGAAAGTTTTGACTTTCTGAGATCACTTA	shared
TCGATGCGTTCGTTTGCCGTTTTCGCTACAA	shared
ACAAAAAACAGATCAAACAAGCGAAACCGGG	shared
AATCCTCAGTAATGCTTCCGGTAATGTCGCG	shared
CGATTCGAGGCGGGCAGCGAGATATTCATGA	shared
CTACTCGTACGGTGACGAACAACAATGGCCG	shared
AAAAATCTAAGGCTCTCGTATACTCGAACAA	shared
AGAAGGCAGTGCGTCAATACGAGAATGGTGA	shared
CAAACGAATCGACCGAACAGCGACAACGCTG	shared
AGCGCTGGAAGAAGAACGCACTCTACTCGCA	shared
ACACCAGATGCGCGCCGCCAAGTGCGAATAC	shared
AAATCGGCCTAACCAACACGACCATTACCAA	shared
ATCGAGCACACGGTTCGAACGGTTCGCCGCA	shared
CCAAACGTTCTCGTCGCTCACGAGCGGCGTC	shared
CTGGCGTCCAAGATGCGATCGCGTTCGTCCA	shared
ATGCGACCAATGCTCGTGTAAACGCGCGACA	shared
GAGTTGGTCATCAAGTTTGGATAGCGACACC	shared
CTGTTGAGCGTCAACGCACCATACGTCAATC	shared
CTGCTTGCGCGATTTTGTACCTGATGATGCG	shared
CACGGGGCAGCAGCGGTTCCAGCGGAGACTC	shared
ACCCACTTTGGTCGAGGTAGTAACCGATGTC	shared
CGGCGATTTCGACCAACTACTCGACCAACTA	shared
CGTCACCGCACCCGGAGCCGGAGCCGGAGCC	shared
CCGGGGTGGCGGTAATGTCGATGGTTTCTCG	shared
TTCGGAAAGACGAGACACAAACACTTAACAA	shared
GATCTACGCGTACATTCGACACTCGTTGGCC	shared
CGTTTCTCACGAAGCGCGCCCAGGGAACGCA	shared
ATCTTAACGAGCGGTTCTGTGGCAGCACGAC	shared
CCGTGCGTATCAAAAGACGCGAACGAGTACG	shared
ACCTTGATGGTGGGGAACGCCAACCCGCCAA	shared
CGAGCAGCTCGCCGAACAGGGCGCGAGTTCC	shared
CACACCAAGCTGTCCACCTAGTCCAACAAGC	shared
ATAGTCATGGCAAATACAAAGACGAACGAAG	shared
ATGTGAAGATGATGATCACCACGATAGCGAC	shared
CTCCTATGTAATCAGCAACGCTCGGGCCGTC	shared
CGAAAGCGAGAGCCTCGATATTATCGGAGAC	shared
TCGACTGTTCGAACCTACTTCAGACGTTCAC	shared
TCATCTGTCTGGATGGACCAAGGTTGTGCAC	shared
CAGGAACGCGACGTGCCGCCAATTGAGCGTC	shared
AACCTTGCGCAATGATGAATATGATGAACGT	shared
CGAGCAGGTCAAGATGTCCAAAACGAAAGAC	shared
CGCCGCCGCGTAGCCTTAGTAGATTCAAAAC	shared
CGGCAGCGCGCCGGAAGCGCGGCGGCAGCGC	shared
GATGCGTAAACGTAGCGTTCAACAAGTCGAC	shared
TCGACCGAATCGCCGGTCGGTGCGACGAACA	shared
CCGTAAAAGTGTGCGTTGGTCAAGCGTTTAA	shared
CAAACCAGAGGCAACGCGGCTCCACCGTCCG	shared
TCGTGTGTCGGTGAAACATTTTCAGTCGTAA	shared
TTTTATCTTTGTAATCTCTTAATACCGGGTC	shared
ATTTAACGTTAAGCAGACCAACGAGTCAGCG	shared
CCGTCGCTCCGTCGCACCGGCGGCCGCAGCC	shared
TGCTTCAGAGTCATCATGGACGAACACGTTC	shared
AGAGGTATTCGGAAACACGACAGTACTGGTA	shared
CAGTCGTTTGTCTCGCTTTCACTGTTGAATC	shared
GCTTCAGCCATGTTATTGTATTCTTCGGAAC	shared
ATATACCCGGCCTCGAGCGAGCACGATTATC	shared
TTAACGCCGTGACGCTTGTGCAGCTCACGCC	shared
AGCGGGAACATCCAACCTTGTGAAACGGTTC	shared
TGCAACGTAATCTCGGTGCACAGGTTCGAGC	shared
AGCGCTTCTCGTAGAGACTCATCCGTGAGGA	shared
ACATGCAGTGCCACTTTGAACGAGTATCGGC	shared
CAGTTGGTAGTAGCGTTCAGACTTGCTGGAC	shared
ACGAGTCGTTCGAGCGCGGCGCTTTCCCGCC	shared
CACTACGGTCGACCACTATCTGCGACTCTCG	shared
ATTTCGCCCCGACGACACGTGACCAGTTGGA	shared
TGTGAGCGAAACGACAAGCGTCGGAATACGC	shared
CCACTTGATCCCGTGGCTCTCGATGTACGTA	shared
AACGACGGAGATAACCACGATCGAAACGGTG	shared
CACAGAAATGGGTACCGGACGGTTGATCACG	shared
ATCTGTGTGTGATGGCGCACGCGCGACAGCG	shared
TCGCTGGTCGGCGTACCACCCACCACGATAC	shared
AAGATAAACGATTTCTTTCGACACGTTTTGT	shared
AAACGAAACCCATGTCGGTCCACTCGGTACG	shared
AAACCCGCGAGACCTACGAGGCCGACGAGAA	shared
TTCTGGACTGGTTGTCTCGAGCCGTTATCAA	shared
ATCGATTGGTCCATCGATTTGGTTTGATCGC	shared
CGCCGACCGCGCTCACCCGCGGGCGGACCAA	shared
CGTGTGGGTGATTTGGTCCGCCCGATAAAAC	shared
ACAAGAGTACCAATATTTGGACCAAATTCGC	shared
CGTTCGCTCCGGCGAGTTCGCCGTGGTGAAC	shared
AGAGGACTCTACTAGGACACGAGTGCGACGG	shared
CATCCAGCAGCAGCGCTCACGCTACCAGCAG	shared
CGACCACGATAACGCGATGCAAGTACGTACA	shared
CGTGGAGCACATTCTCGCAAAACGGCTCGTC	shared
ATCGATGCTCGTTGCGACACACGTTGCGACA	shared
AACGCAGTCGAGCAAAGCCGAGTTTGCGACA	shared
CGACCAACTGAACTACTGACCAGATGGTCGA	shared
AGTACTGCAAACCCGGTCGTCTGTTGTGCGG	shared
ACCAATCGTCTCCAAGGCGTGGAGCACATTC	shared
CCAGTCGATGTCCCAGCTGGTCAAACCGTAC	shared
ACCAAGCGTGAAAAACGAAAAGTCAAACATG	shared
GAAATCAAAGTACTGACATTCGTGTTTGAAC	shared
TTTTTCGAGCGATCGTACGAACTTATTAATC	shared
AGTCGCTGTGTATCTTTGACCCACTTTGGTC	shared
CCCGAGCGTTGCTGATTACATAGGAGAATGC	shared
AGCAACACTACAAAAGCGCAAAAGCGATCGA	shared
ATATTTCCGGGAAAACGTGGAAATCGATCAT	shared
GCCTCATATGCGGCGGAACTGCAAGTACCCC	shared
GACCGGTTCGGATGCTGGTCCGCCGGCCCAC	shared
CAAAGCTGTTTTGAAGTACGTATCGTCGGGC	shared
CGAACATTTGACAGTCGTTTGTCTCGCTTTC	shared
GACGCGTCGCAAGTCGCGTACGACGCACAAC	shared
AGGCGTTTGTTGTCCATAAATTGGATCATGA	shared
AGATAAAATTGTACGTTTTTGCGATGAAGCT	shared
AGCCACCTCGTCCAGTTCGGTTGTGGTCGCT	shared
CACTCTTAGTAGGCGTATTCGTGGCAGTCAC	shared
CAAACACACCCAAGGTTAATTGATCGACCAA	shared
ACGACAAACCCGACTAATAAAACCAACAACG	shared
CCGCACGAAAATTGGACTCGCAAAACCGCGA	shared
AATCGCCTCTCAATCATTCAATCGTTTTGGT	shared
ACGCCTACGAAAACAACAACAAAATCAGGAC	shared
AACAACTTTTTGTCGCGGTACACGCTTCCGC	shared
TAAAATCTAGTATTATCACTAGCTAAACAAC	shared
TCGTCGCTCGTTCTTGGACCCCGATCCGCAA	shared
AGAGGAAACAGCAAACATAAACGACCAAGTA	shared
ATCATCGAACGTTACCTCGCCGAACAACTCG	shared
AGAGACGGTCCGCGAGCACACGTGCGCTAGC	shared
AGTGTTCGCTCGTTGGTGTCGTCTTCGTCTG	shared
TTTATCGGTGGATTTCAACAAAACGTACAGC	shared
AGTACTCGCGTGACATGAGGTACACGTGGCG	shared
ACCATGATAGATTCCGTCTCCATCGCCGTCG	shared
CCTTCTTCGGCGGGGATCAGGGTGTGGAGAC	shared
AAACTCGGTCTGCTTGTTCGCTATCTCGTCG	shared
ATGCGTTTGGTGGTGACTAACGGGTCGATAC	shared
AGTGCGACGTCGTGAGATAACGGTCCGCCCG	shared
ACCGAGCTCGCCACATTCGCCCCATGCCGTA	shared
ATGATTCCGAAACACTCGATGGTCCAGGAGC	shared
AAAACCTGATCCACACAAACGAACACACGAT	shared
CGGTGTCAACTAATGGCACAAGCGAACCGAC	shared
CGTTCTCGACTACAACCCCGCTCAGAGACGC	shared
AGAGTGGCTGGACCCCAAAATAGCCGACTTC	shared
TAAAGAGCGCTCGATGGTGATGGTTCTAGAA	shared
TTTCGTGGAGAGTATAAGATCCGAGGAGCGC	shared
CGGTCGATGTAGTGGACCGGGTTGGTGTTGA	shared
TATTCTTCTCAAGATGGATACTAAAGTTCAC	shared
CGAGTCTACCGACCGGACCGTGCTACTCCAA	shared
TATATTGTAATTGCATTAATTGTTTAATAAC	shared
TCGGTCGAAAGTGTCGTAAGTGGTCGACAGC	shared
CTGCTTCTTTGCGTATCTTCTCGCCATTTCG	shared
AGCCGTTCTCGAAGATCAAGTAGCTAAACTC	shared
CAATGAGCAAAGACGCGCCGCCAGAAAAACG	shared
TCGTTTTTACGGACTGAGCGGCGATCAAACC	shared
TTCGCCGAACGTTGTGTTATTCGAGACGTCA	shared
CGCATGGCGGTTCGGTCGCGCAATTTCGCGC	shared
ACCTGGAAGCCCTGCTCGTTCTTGTGAAAAA	shared
GACGCATACCTCGACAACGTGACGGCCGTCC	shared
CGTACATGCGACCACAGTTTTCCAGTGGGAA	shared
GATATCCGTCTACCTTCACAACGTGGGGCAC	shared
CGTTCGTCTTTGTATTTGCCATGACTATGAA	shared
ACCGACCAGTCGGGACCGTCGCGCTCCTGTC	shared
CATGTCGGATTACCGTACACGTAGTTGAGGC	shared
CGTCGTTCGCGTCGCGCGGACCACAACGCCC	shared
CAAGAGCTTGGACAACACGCTGTATGCAATC	shared
ATCGGGCCGGTCGTCCCATATTTCGCCTCGA	shared
TTTTCGGATGAGTTGCTGGCCCTCTTTGATC	shared
CGACTTGTCGAACGGCGAGTACTCGCGTGAC	shared
AAGTCATGTATAAAGTCGCACGACGTCGCGA	shared
ATCGGATCGAGCTTGAGTTCAAGTGGGCGTA	shared
ACGAGTCGAATCGAATCGAGCTTAGCTTGCT	shared
CGTCGACCGACAGCAACGATATCCGGAACGA	shared
AACAAAAAACTGAGGAGAAGCCGCAACATGT	shared
CTCTACTCCTACAAGCCGGTCAACTACAACA	shared
TCACGTTGTGCATATTGGTCAAGAAAGAGAA	shared
CGCTCGTTTCTTACGATCACTCGCTCGACCG	shared
TAGTCGAAACCGATGGAAAAGTTGCAAATGA	shared
ATCAACAGTGTGGTCGGGCTTTTTGCGAAGA	shared
CACGATACCGCAACAACCAGTTGAACGAATC	shared
GAGTAACGATTGCACGCGCGATCGCTCGTAC	shared
ATCAACTAGGTCAAGTTGGTGATCAAACAAC	shared
GACGAGACATCGAGATGCGCGTCCGACGATC	shared
GAGCCGACTTCAAGAAGGCTATCGAGACGGC	shared
CTTCAAAACGGTGACGACCGCCACGTTGTTC	shared
ACTCGCGATGACGTCGGCCACCCGTACCAGC	shared
TGCGTTGCTCGCTTCGTCGAGCCATGTCCAC	shared
CTTAGACTATTAAGATTCTCCGACTGGTTCG	shared
TTCGTCCACGTCCTCGTCCTCGTCCAGCTCC	shared
AAAAAAGATGTAACGGCAAATCGCCTGAAAA	shared
CACAAAGTGCGGTCGCCCGTCTTCCGAACGC	shared
ACCATGCGTCGTCTGCTCACCAACACGCGAA	shared
AAAATCAAGAAGTAACGGTTTATAGTTGTTT	shared
CGACATGTTTGGCGAGATGAGCAACAGTCGC	shared
ATCACTCGCTCGATTGGTCGATCAATTAACC	shared
CATGCTGGTGGACAGCCAGTACGGTCGGGCG	shared
AACGAGAAGTGATGATTACGATGCGAGATCG	shared
CTTGTTCCCCGTTCAGCATCCCGACATCTAC	shared
AGATCAAAACGAAAATCGATGAAACGATACG	shared
AAATTGCGACGCGAGGCGCCCAACGACAAGA	shared
ACCAGTTTGTTCACATTTCCGGTTGTTGTCG	shared
CGATTACGATTACGTGGTGACTCACTGTTGC	shared
TCTCGTGCATCTCGGTCAAATTCGGGCTGAA	shared
CGAGCAACTCATCGGGTATCTCGATACGAAC	shared
CATGATCCTGATGCGCAGCAAGCGAGAACTG	shared
CATTTTCGATTCGGTCCACTGGCGTCGCTAC	shared
AATTTTTGAATTAAAGACAAAAAAGCAACCC	shared
CGAGGAAGAGAGACGTGAGACGACTCATCCG	shared
ATCGCACGAGATCGGCCGTCCGTATTGCGCC	shared
GTCGACATTCGGAGCGTTTTGGTCTGACGAC	shared
CTCGAGAAAAGCGGTCATGCTGAACGCAGCG	shared
CGCGCGTGGATTCGTTTCTTCAAGCGCAACC	shared
ACTACGAACTGCGCAACCATAGCGATAACAA	shared
TAGAGGCAGGTAGACGCGGTTTTGCGCGAGC	shared
GAAAAGCGTCATCCCGGAACGAGCGCAGTTC	shared
CTTGAAGTCGATGGAGTTTGCGTAGTTTGGA	shared
AGCGCTTGCCGTTCCGCTTGCGCGAGGTATA	shared
ACCACATGCTCTACTTTCTCATGAAGGAAGC	shared
CCTCGCAACGCGAACGGCTTCTCGCTGTGGC	shared
CCGTCATTCCTGTGCCCGACGTGGAACGCGA	shared
ATTCGAGCGATGTTTCACTCTTCGGCGACGC	shared
GCAGGACGCGCCAGGACGCGTCAGGACGAGC	shared
ATCGCTGGCGTCCAAGATGCGATCGCGTTCG	shared
ACGGTTGGACGAACGGACGGATAAACGAGCG	shared
TTGTAGCGATGCAAGAATCGCCATTGCGGAC	shared
AAGCAATGCTGGCTCGCGGGAATGATCGGAA	shared
ACTCCATATCGAACATCTTGAATGATTCGAG	shared
ACCGACTCATCAACGAGATGGCGTTACGCGT	shared
CCGTACTTCCACCAACGGTTCGACCGCGACC	shared
CCGGAAACAACCACAGCGTCTTGTTTTTTGA	shared
CACTGGACCGCAACTTTGCGCTCGCCGAGCG	shared
GACTCGGACTATGCCAACTACATCAGCAAAC	shared
CATGGCGGTTCGGTCGCGCAATTTCGCGCAG	shared
CGAGCGGAAGAGTACACCAAACGGACGAACG	shared
CTACTTGTTCTAATCGCGAGTCTCGCGGACC	shared
CATCGACAAAGAAACTCTGTTTGGGCCACTC	shared
CCGAAATTTCGGTGGTGGGGTGGCTTTTCTC	shared
ATTCCTGTTCCAACAAATCGGCTCTACTCTG	shared
TGGTAACGCGTAGAGCGCACCGCCTGGCCGC	shared
ATTTGGTGGGTTTGGAGAAAGGGTTGATCGA	shared
ACCAACCGATCATGGATTCGCCCCCGGTTAC	shared
CTTTTTCGACCGTTTCGAGACCGAGTACGGC	shared
CGCATAGAGAACATACGAGTTTACTACGCAC	shared
AAAACTCTTTGTAGGTGTGCGTGTGTGTAAA	shared
CTCGGTTTCGGCGGTAACGTTAGTTCGTTGA	shared
AGACAAACTGTTACCCGACTCGGAGGACAAA	shared
AAAACCAAAGCAATCGCTTTCTCATACACCA	shared
CGTAACGATAAACTCTGGGCTATCTCGCTCA	shared
CGGTCGGCTGGTAGTAGTCCGTTGAGTGGCA	shared
ATTTTTGAGCGCGACTCGACGACCGGCGAGC	shared
CACTTATCGAAGACGATTCGATAACACGCAG	shared
TCGTTCGTCGCTCCGGTCGTAGCGATACTGC	shared
AATTCGGTTCCGTTCTTCTCGACCACAGCGT	shared
TCAACTGTCTGCACTCATCGATGTGGTCGAC	shared
CCTGACGAGCGACCGGGCACTCGGCCAAGCG	shared
AACATCTTAGCCGTCTTTACTAGTGTAAAGA	shared
TCCATCTCGTAGATCTCGATCATAGGATCCA	shared
AGTCGAGCCGACCGTAGCGATCGTACGCTGA	shared
CTATAATATCAAAAATCCGAGACTCGTTGCA	shared
CACATCTTGGAGGAAGCCGTTCACGTTATCG	shared
CCGGAAAACGGTACCCTAATAATCACACGGA	shared
TGCAACCGAGCTCGGTCAGCCGGTCGATCAC	shared
CATGTCGTCATGTTTCGCCGATTCCCTGTAC	shared
AGACCATCTCAAACGCTCTGGCGTCGTCGAG	shared
TGAGAAGATGGACCGCTGTTCGTCTTCGTTC	shared
AGCATGTGGAGTCGGAGTTGAAGCAGTTTCG	shared
ACTAAGGTTTATAAATTTGAAAATCAAGAAG	shared
AGTCTCCCAATTTTCGTGCAAAAACGCGACG	shared
TATCCATCGGTGGCACGAGACGCGCGAGAAA	shared
AGCGGTCATGCTGAACGCAGCGCCACACACG	shared
TGGAGCAACCGCCCGTCGTGGCCGCATCTCC	shared
AACAGATGGACCAATTGGGACAACACCATCA	shared
CGAGAGTGTATAAAGCAATCGAAGCTTCCGA	shared
ACTCAAGGAGAACCACGACCTCTCTGGTGAC	shared
TAATGAACTTTCTCAACGACCTGATGGACAA	shared
AACAAACAATTATACATCAATCATGTCATCG	shared
CGACATCCATTAACACGATACCTGACATGCA	shared
ACGCGAGTGCTCGAAGTGAGTTTGGCGAACG	shared
AGAAAAGATGACACTGCGCTTGAAATTGAGG	shared
CAACCTCTTCCGATCCCACGGCCGATCCCTC	shared
TGGCGGTTATTTTCCTCCTCTTTGTGATCGC	shared
CTTTGTTCTCGGGACAAGTGCAATCGAGGTA	shared
CACCAAAGTTCCGACTACGACCAATGTTCCG	shared
AAGAGTTCCAAGATGAACTTGAGGATCAAAA	shared
ACGAGCACTGGCGACCAGAGAACGCGGGCAT	shared
TACCCAGCGGTGAGCCATCTCGCACCGCCTC	shared
CCAAGATGACGAGCTACGATTCGCGGGCGTA	shared
AACTACGATACCAAACACAAACAAACGCCGA	shared
ACTAGCCGACTTGGCTCGTGTTACGACTCGG	shared
AGCACTCTGCACCGCCGAACATGGAGCAACG	shared
CGACACGTCGATTCGCGTCTCTTTGACGACG	shared
AGCGGGACGGACGTGGCGAACGCGAGCTTAC	shared
ATGTTTGTCTGCAAAGACGCCCGTCTCAACC	shared
TCCACGAGCTTCATGTAGGTCAGAGTGGTAA	shared
CGACATTGCGACGCTATTGAGTTGATAACCC	shared
AGTGGGATATTTGGTCGCCTCTCCGCAACGC	shared
CTCGCCCGAATTTGAGATGTTGCTCTCCTCG	shared
GAAACCATCGACATTACCGCCACCCCGGTTC	shared
CCAACTCGACCAGCGTCTCCGACGAGTTGAC	shared
CTCGCGTTCTATCGATTGCCAGGAGTTCGAC	shared
ACTCGATGTCCACAATCGAGACACAACCGCA	shared
TGCTGGACGACGATAGTGGGACCAACAAAGC	shared
ACACTGAGATGATGCCGATCGGCGAGAATCT	shared
ATGATCTACCAGCTGGAACGCGTTAATGCCA	shared
ACGCGCGCAACGTGGAACCGTGCCGGAGTAT	shared
AACCACGAGGGCTTCAGCGTGTTCGTGCACA	shared
AGAAGCATGATCGATATAAACGATCCGAACC	shared
CACGTCGGGCACAGGAATGACGGTCATCCAA	shared
AGTTCTTTTTGCCACGTATTCATTATGTAAA	shared
CATATTCCCGTACAACTTCCTTCTCACGTCG	shared
CGTGTTCGCTTGCCAGCTGTTCAAGTTGTGC	shared
ACCGAACCGTTTGACGCGTCGCAGAATAGCA	shared
ATGAGTGGAAGCGGCTCGAGTGTCCGGAGGG	shared
ACTACGTCAACGCCTACCAATATTTGTGCAA	shared
CACGTCGCGCAGGTTGCTAAAGGTATAGAGC	shared
GCCATCCTTGTCCTTGTTCTTATCTTTGTAC	shared
AACTCCACGCAGCTGGTCGTTTGAACAAGAT	shared
AATTGAGTCGCGCCGAATCTACGTCGAGCGG	shared
AAACGACCAAAATGACAACCAAAATGACAAT	shared
TAGAGATCGATTTGCAGTCCGATCCGTCACA	shared
CCATGATCATGATCGCGAGGAACCAGAAAAG	shared
AGACGAAAGTCTAGAGTATAAAACGATCGCC	shared
TTATGTTTCGTGCAAACACGAGCGGCTCAAA	shared
AATCTTTACAAAGTATTTACACCGGACAATC	shared
TCGGCGCCTCTCGCGATGCCGCCGACACCGA	shared
CGCAATCTAGACGTGAACAACAAACCAACGA	shared
TACTTGAACGAACGCGTCGCATTTTCCACGC	shared
AGTGGCGAAGACGCGGGCGTTGTGGTCCGCG	shared
TGAACTACCGATCATGAGTCTAGACGCACCA	shared
AGGAGAACGAGGGTGACTACGATTGGGACGA	shared
CCATGTCGCTGCACGCGCGGTCCACGTACTC	shared
CACACAATGTTGATGCTCGTTTGGTCCTCGC	shared
TGCGTTGGTCAAGCGTTTAAAGTTGGGCACC	shared
CAACTGAAACCGCTGACAAAAAGGACACGCC	shared
TCTAATAATATTCTCTAATAATACTCTTTAA	shared
CGAGCGACTAGTCGCTTTTGCTGTGGTCGAA	shared
ACGTCTCGCGGGAAAATGCGGTCCGTAAACT	shared
GCTGAGCGGTTTGGTGTCGCGGTTCCGATCC	shared
CATGAATCCCCAAGGTGAAACACTTACTCCA	shared
CAAAGTAAAACACGGCTCCACTCGAATACAC	shared
AAGCGACTGAGCGAGAATATCGTAAATTTCC	shared
ATGAACCACGATACCAAAAATAATGATGGTC	shared
ATCGCGGTTGGTTTCGAGGTCGCCGACCGAC	shared
CCGATCCGTCATTCGGTTCTCCATCTCGAGA	shared
CGAATGCAAGTGCTATTGTCGGGTATTGAGC	shared
ACCACATGTTCGTCAATAAGTTTGGACTAAA	shared
CTTCCAACGGTTCCTATATGGTTTTAGACAA	shared
TCAGACAGTACCGATAGTCGATTCGAAACAA	shared
CAGATACCGCGCGGCTTGCGGGGAAGACAGC	shared
ATAAAAAGTCGACGGATACACCTCCTCTCGC	shared
CTCACAACCCAACATGAAGTTCAGCACGCGA	shared
ATACCGCACGGTATGGGAGATGCCGCAACGA	shared
ATTTTGGATAAGTACTACGTCAACGCCTACC	shared
AAGTTCATTACGGTGGTCTTGCCCGAGCCTG	shared
CTGTACAACGACTTTACGCACATCTCGTTAC	shared
TCACAACACCCGTGTTTTTGTCGCACTCGAC	shared
TTCGCAGTTCATGAATATCTCGCTGCCCGCC	shared
CGACCAGATGACCAAGCGAGGCAACTTTGAC	shared
AACCGACAGAAACTAATTCAGTACAACTGAA	shared
AACTACAATTACAAATAATGGCACAAATAGA	shared
ATCGCCATTCCAATTCGGTTTCGATCTCGCA	shared
AGAGACTGTTGCAGCGAGTCAGTTTGAAGCT	shared
CGACAAACCGCTCCACGAATACTCGACCGAC	shared
CGTGCTGAACGCGCACCACCGGTTCTACGCC	shared
TAATGCGACCACTCGAGTATCAATCATTTCC	shared
TCGCTGTATCGAGGAGCGCCGTTTGCACAAC	shared
AACGCTGTCGGACATCGGTGAGCAGCTTGCG	shared
TCGATGAGCGGTTCGACGATCGATTCGCCAA	shared
TCTCGAGATGACGCGGGTCGGCCTCTTGCAC	shared
CAGGTCCGTCTTGATGCACCGCACGTTGTCC	shared
ATCGCGTCAGCCCGAGTCGCCCGCGGCAATC	shared
CGACATCAACCGGCAGTACAACTGGTCGATC	shared
ACAGCATATCCAGACAGAACCGCAAACACTC	shared
CTCGTTGAGATCGAACCGCTACCCGAAAAGA	shared
CAGCAACAACAGGTTCACCACGCTCACGCCA	shared
ATAACTGTCAACCTTGTAAAACGGTATAAAA	shared
ATCGTGTATTTGATTAACCAGTCGCACGCAA	shared
CAGTAATTCGCTGTGCGGTCTGGTCGTAGAC	shared
AACCGATTTGGATAACGACTCACCGTTCGGA	shared
ATAAATGGTTGTTACAAAAACTCTTTGTAGG	shared
GCGACACACCTTGCGTACGAGAGCAGCGCCC	shared
TTAATCGATCGGATAAACTACACGCAAAACC	shared
TAGGGATCGCTGTTTGGTTCGGTCTCGCTGA	shared
AAAGATTCTATCCGATCCGGAAAACGATACC	shared
ACAATACAATTCGACATAAAATTCGGTGTAA	shared
AGTTGGCCGGGATAACAACCCACCGCAAGCG	shared
CCAACAATGTGATCTACAACATCGTACGTGA	shared
AGAGACGAAGCGCGAGCGTGAGCACGGGAGA	shared
TAGTCAAGATGATTACATCGACTTGTTGGGC	shared
TGAAACGATACAACTGTTGAAAAATTATAAC	shared
GCCAATTTTTTTCGCTGTTAGATAGAGCAGC	shared
CGAGATTAACATCTCGGGGCAAGACGCCCGA	shared
AGTAGTATGACGAACCGAAGAATCGATCGAC	shared
ATGGCGATGCCGCATCTCGTTGGGCGACGCG	shared
CGACCGTTGCTATGTCGTAATCGCCAATTGC	shared
CCGCAAGGTCGCAGGATCTCGTCGGGCCACA	shared
GAGAGCGCCGGCCAAGAACCCAGACGAAGCC	shared
GTAAAGTCTCGCAGCGAGTGGGACGTGTGAC	shared
TGCATGAAATAATAAGGAATAAGGGAATAAC	shared
GTATGCGTTTTCTTCGTTGTATGTCTTGGAC	shared
TCAAACCGGACGAAGAGATGCCCGACGTGCC	shared
GCCTACTAAGAGTGTAGACGAAAGCGTTTAC	shared
TTATTCGAGACGTCAAGTTCGGGAATGCAAA	shared
ACGTTTAGTTACGTGAAGGTACATTGAGATA	shared
CCGTTTCTACTGATGCGCCGAGTGAACACAC	shared
CCAAACCAGAATTCCTAGGACTGATACTACA	shared
AGTGGTGTCGGTTCGCTTGTGCCATTAGTTG	shared
CTAACAAAGCAAACAACGCAAACGACGCAAA	shared
CGGCGATATTACGATGAGCTCGAACAGACGA	shared
ACGCGTCGCAGAATAGCAAGACGGTCGTACC	shared
ACCGAGCACTCTGCACCGCCGAACATGGAGC	shared
AATCCATTAATATTATTCATCTGACTCGCAC	shared
CTGACCAGATACGTGACCATCGCGCTGCTCG	shared
CCGGTCCTTCTCCATAATCATAAAACACGCG	shared
AAAACAACTCGAGATGGAACGAGAACGCGAG	shared
ACATTCAAATTGAACGAGAGTCGCTTGAAAG	shared
ATCGCTACTTTATCGACAGCGGGATCGAGCG	shared
TTCAACTATGTTCTCGCGTCGGACATCACAC	shared
TGCCGCCAATTGAGCGTCATAACGAACCAAC	shared
CGACATGGAGAGCGTGATCAACCGTCCGGTA	shared
TCGTCGCACACGCGGTCTTGGCGTTCCAAGC	shared
TGGGCGGGAAAGCGCCGCGCTCGAACGACTC	shared
CGGTTCGAACGGTTCGCCGCAGCATTCTCGA	shared
AACGAACCACTATACCCAGTACTGGCTGAAG	shared
AAGTCCAAATCGACTCACTGGTATGACTGGT	shared
GAATCCTCAGTAATGCTTCCGGTAATGTCGC	shared
GAAAACAGCGTCGATGCATCCACCTAACGAC	shared
CTAAGATGGAGCGTCTGCTCTACGATCGCAA	shared
CGCTCGACGTTGCTCCATGTTCGGCGGTGCA	shared
CTCGGCTTCCGCTGTTTCCTCGGACTCCTCG	shared
TTAAATGCTCGCTCATGCCGCGCGGAGCTAC	shared
TTGTAGAACGGGATGCTCGGGCGCTGACAGC	shared
TAGCATCAAGATTATGCGCTTCAACGAGCGC	shared
ACTTCCATTCTGAAGAACCACGACGCCAACC	shared
ATGGTCGAAAATCGGGCTCGGCGATGAGTGG	shared
AAACCCATGTCGGTCCACTCGGTACGAACAA	shared
AAATAGGCTGGAATAACGGTAGACCAGTGTT	shared
AGTGGGCACACGATTGCACAGTTGAGCCCCG	shared
ACGTTCGGAAAGACGAGACACAAACACTTAA	shared
AGTTGTCCTCCTCGTCAGACGAATCGTCGAA	shared
AAGAGAGCGCCGGCCAAGAACCCAGACGAAG	shared
CGCACGTTTGCGCGTTTGCGCGTCCGCAGCC	shared
AACTGGTAGAGGTTGAACGTGTGGTGCACTA	shared
ATGTACGAAGAGTACACTACTCCGAACCAGA	shared
ACATTATCGTCTGATAAAATAGCGACACATG	shared
CGCCCCCTGGTAACGCGTAGAGCGCACCGCC	shared
TGCGCACAAGTCGACCAACAATCGTTGCGGC	shared
AGACTACTCATCAACACGAACCCGCTACCAC	shared
ACTACACGCACACACGCAGCGAACTCATCAC	shared
AGGTAGGCCGCCCAAAGGCTGGCCATCGGCG	shared
ACGGTGACGACCGCCACGTTGTTCACGTCTA	shared
ACGGCTGAGCGGCTAAGTCCGTAGACGGCTG	shared
AGCTGCGCACAGATTGAAATGAGGAAAAACT	shared
ATCGCAACTCTGACAGAAATTCGGACCGAAA	shared
ACCAGTACTTGGTGGACGACTTGGTACGACT	shared
AGCCTCATCTGCCGTTTCTTTACTCCAAGTG	shared
ACTCGAACTGCTGTTTGTCGAATTGTTTGCC	shared
GAACGCGCTCGTTTCTTACGATCACTCGCTC	shared
CGATCGACTCGAGTTGACGAAACGTTAGCTC	shared
TATCGGAGACATCGTCTCCAACATCATTGCA	shared
ACCACAGCTCGACCAAGGTGACCAACATCTA	shared
TGACCGCATAGTCGATGATACCTCATCCGAC	shared
CACTAGCTACACACGAGGCGCTCGTTATCCG	shared
ACGCAAGTCGATCACGCAGACGCTGATCGCA	shared
CACCGTGGTGAAGCTCACGCGAGTCGCGAGA	shared
CTTCTCGCGCCCTCGGCGACCAGCCCGGGAC	shared
AACGGCGGTGAGTAATCGCGAAACAAGACGG	shared
ACCCGGTACTCAGTCGTTTGTCTACACCAGT	shared
CACCAACTCCATCTCGGCAAAGTTGCACAAG	shared
CGCGGAACAAGCCGTTCTCGAAGATCAAGTA	shared
ACTCCCCAATAATACTCTCAATAATACTCCC	shared
TACATTCGACACTCGTTGGCCGACTTGTCGA	shared
ATATCGGGAGTATTATTGAGAGTATTATTGG	shared
TCTTGTGATCAAATTGGTCCAATCATTTTTC	shared
CCCTTCGGCGCGCCGCTTTGCGATTGCGCGA	shared
TTCCTCACCAGGTCCGTCTTGATGCACCGCA	shared
ACGTCTCGCTTATTTTCGGTTTGATTGCAGA	shared
CGCCGAGCGAACACTTCGCACCGAATCGGAA	shared
CGAACCAACTGTCGTTATTACGGTTGAACGC	shared
CGCATACAACCAATTGCCCCTCATCCAGGAA	shared
ATCCAGCGTGTGTGGCGTGTTCGTCCCACTC	shared
ACTCGTAAAAGTCGAGTTTGTGCATCCGTTC	shared
AGACCCCACAACACCCGGTTCCGATAACGAA	shared
ATCTCAAACCGAGTACTTACCACCATACCAG	shared
AAAGTACAAGCAAATTGTTCAGATTTTTAAT	shared
GACAGTACCGATAGTCGATTCGAAACAAGTC	shared
AGTGCATCGGTGTTGATGTTGGTCGAGAAAC	shared
TTTGATAGCCAATTTGGTCGGTTCGATTGAC	shared
AAACTCTGATTCAAAGACGCATCCAAAGTTG	shared
CCGGAAACAAACACAGAATCTCGACGACTCG	shared
ATTTCTTCAAATGCATCTTGGCCTTCTTTGC	shared
ATTACTTGCAACGCATGTCGGCCCACGAGAC	shared
CATCTCGTTCGAAGACCCTCCGTACGGACAG	shared
GACTTCTTGTTCGTAGGCGTCGCGGTTTCGC	shared
CGACCTCCTGTTCTTGCCGGTCGTGACGTGC	shared
ATACGTCTTTTCGTGGACGCGCAACAGTTCG	shared
ACTTTTGGGCGAAAGACGCGGTAAGGACGGC	shared
CGTTCCCAAGTTCAGTCGACGGCGATGGAGA	shared
CCGATACCCACATCACCAATAGACGCACAAA	shared
ATGCATATGCTCTCGGTCGAGCTGTCGAGCT	shared
AGGTCCGTCTTGATGCACCGCACGTTGTCCA	shared
CCATCAGGTTCTTTTACAACTCGATCGACGA	shared
ATCGAGTCGGAACTGGCAAACGCAACGAATC	shared
TAAAACCATATAGGAACCGTTGGAAGGTTCA	shared
AGGAAAATCGAACTGGAGAGGGAGTTGATAG	shared
CAGATGATCGAGTCGTGCGACCAACTCTTGA	shared
ACGACCAGTATTTGCAGCCGCTCGAACCCAG	shared
AGTCCGAGCGACTTTTTGATGGAATCGTCGA	shared
ATGTTCATTGGTACATTCCAGTGTCCTTGAC	shared
ACTCCTGCTCCGTATTATTTGGTCCAGACTC	shared
TTCGCCCGACCGTACTGGCTGTCCACCAGCA	shared
AGACGCGCTACGTCGTCGCGCGGCAGGTCCG	shared
TGGATCGCCGCCACCCATCATCTTTCTAGCC	shared
TATTTAGTTCGTGCGAGCCGACCCGGGAACC	shared
CACTGCCTTGTACAATCAGATTACGGAAAGA	shared
AAGAATTCGCATCATCTTACAAACAAAATAC	shared
AGTTGGTGGAGGGATCGGCCGTGGGATCGGA	shared
ATGATCGAGATCTACGAGATGGACGGAAACG	shared
CGAGCAAGTCGTTGCAACGCACACGCAGTTC	shared
GAGCGAGAGCGTTCGCGCGAGCGGCTCGAGC	shared
TCGGTCAATCAGACACAGAGCAGCAAGCGAA	shared
CCGCCCGTCGTGGCCGCATCTCCACGGTCGC	shared
AGAGGCCGAGAAAAAAGACGTTCGAACGCGC	shared
TCGCCACCCAATCGAGTTGGGGACTCGCCGA	shared
CAGAACGGTCGTACACGTTTTGCCCGTCGGA	shared
ATCGATGAGTGGAAGCGGCTCGAGTGTCCGG	shared
AACTCTGACCAATTCCGCACGAAGAGACGCA	shared
TTCCGTCGCCCACCGTGCACACAACTCTTTC	shared
CGCGAACCGTGCGAGCCACTTGCGATGTCCG	shared
AATAGAAACCTTGGAAACAACCAACAACACG	shared
AGCTCACCATTCTCGTATTGACGCACTGCCT	shared
ATTTCGACGTGAAGAGGAGCGGCAAGTCAAA	shared
ACTTTGCGGAGACGCTGACGGACACGCAACG	shared
ATGAACAAATTGAAAATAACAACACACGGGC	shared
CGAACAACTTGGCGAAACAACCGATGGTTCA	shared
AACAGCTGGGCAACTTGAACACCTCGAACAA	shared
AATTTCACGCCGCTCATCGAAAACGCGCGGC	shared
GAACGCAGTCGAGCAAAGCCGAGTTTGCGAC	shared
CTGCTGCCCAGCTTTTGGACAACGGTGTATC	shared
AGGTACAGTCGACCAAAGTTACGGTCTAGCG	shared
CTGCCGCGCGACGACGTAGCGCGTCTCGCCG	shared
TTCGTTTTTCGAAGCGCTCCCCGATGGAACA	shared
TGGTCGGATCTGACCGCTATGTTGTTGCCGC	shared
ATAAACGAGACGGACAGAACATTTACGTGTA	shared
ATCATCCGAAGTGGTCACAGCGGCACGAAAC	shared
TCGGCCGCGCGTGTATCTAATCGCCGACTCA	shared
ATCGCGTCGAGCGGTTGCGCGCCAAATACGA	shared
ACGGTGCATCGTCGTCCTTGGCTTGCTTCGC	shared
CGCAACGTGGAACCGTGCCGGAGTATTATCC	shared
CTTTATTATCCATCGGTGGCACGAGACGCGC	shared
[truncated: 10,002 more rows]

## Sheet: A. mellifera 18S
kmer	classification
AACAAACAGAGAATTGAAAGAAGGGGATGAT	Non A-lineage
AAACAAACAGAGAATTGAAAAAAAGGATGAT	A-lineage

## Sheet: A. mellifera CDS
kmer	classification
ATGAGATCAAAATCTTCTACAAATGAAATTA	A. mellifera CDS
CGCGCGCGAGAGAAGGAAGACGAAAGGAGGA	A. mellifera CDS
ACAGAATGTGCACCAACAAAAATAATTGCGT	A. mellifera CDS
CAGCCCGCGGAAAGACACATCGCTGATCGCG	A. mellifera CDS
ATCTTCCATAGTGAAGATATACGTAAGCAAC	A. mellifera CDS
AATAATAAAAGAAAGAATTTTCACAGAAGAG	A. mellifera CDS
CAGCGTCGAATCGCTGCCGACCGCGGCGTTC	A. mellifera CDS
TACAGCGATGGTTGGAGGGAAAAACTGTTCC	A. mellifera CDS
AATTGAAACTCCTAATAAAGAAATGGAACAA	A. mellifera CDS
AATCTGCTAAATTATTGAAGTGTATTGGAAA	A. mellifera CDS
TTTTTTGTTTTGTTCTGAATATCATGGGAGC	A. mellifera CDS
CGAAGGCAGGGATCGCGCGTGTCCGACCCGA	A. mellifera CDS
TACCTCTGAAATTTATCAAAGATATTTCTGA	A. mellifera CDS
CGACGCTGAATTCAACTTGAGCGATCCTTAC	A. mellifera CDS
AATAAGCACTAATGATGAATATGATGAAAAG	A. mellifera CDS
AAGAAACTTCATCACAATTCATTAATTCGTC	A. mellifera CDS
AGAATCACCAGTGGAATATTTGATGCGTTTA	A. mellifera CDS
TATGATAAAAAAACTATAAAAAAAGAAACTA	A. mellifera CDS
ATTAAAGAATTATAGATGCATTTTCTTAATG	A. mellifera CDS
GCCAAGTGTTATGTACCACCTCGTCAAGTAC	A. mellifera CDS
ACGTTGGAATTGTTGTCGGGAATGTTCGTTG	A. mellifera CDS
AAATTAAACTTAGAAGATCTACAGAACAAAG	A. mellifera CDS
AACACATTACAAGAACATTCATATGCAAGAT	A. mellifera CDS
GAGCTGATCGTCGACTCATGGAACAAAAAGC	A. mellifera CDS
ATTCCTGCAACAAAATGATGACTTTACGACG	A. mellifera CDS
TCAAGCATTGAAATATTTGCAATATCATACA	A. mellifera CDS
GAAGAATAAATAACGAAGTGGCGACCCCGCC	A. mellifera CDS
CAGGATGGTGAAAACGTGAAACCTAAACCGG	A. mellifera CDS
TACAGAATTTAGTAGATAGAAGCTCTCATGC	A. mellifera CDS
AGAGACAGGTACCGAAACTATTACGTATTTA	A. mellifera CDS
AAAATTTATTTTTTACAAAGAATATGCCAAT	A. mellifera CDS
AAAAAGGATGGAATCTTTTTGACCGACCGAA	A. mellifera CDS
TTAAAATTTTGGAAATATGATGCCATACAAC	A. mellifera CDS
CTGTTGGTTCTATCATTGGTGTAGCAAATTC	A. mellifera CDS
TCAATATTTATTAATAATATTATTTTCATAA	A. mellifera CDS
ATCATTAAAACCATTATCATTTCCACCACCT	A. mellifera CDS
GCGTCCCTCGAGCTTTATTCCATTTAACCGC	A. mellifera CDS
ACACCCTAGCGGATCGCAGGCAATTAATCAA	A. mellifera CDS
ACACAATGGAGTTGGACATGGCAATGTAGAA	A. mellifera CDS
AAAATTATAGGAGAAACACCATTAAATTTTC	A. mellifera CDS
CCGATTATACTCAAGTGAAGAGCAAACGAGC	A. mellifera CDS
CCTCAACTTCCGCAAATTAATCTATTTACCG	A. mellifera CDS
ACAGACATTATTCCTAGGCGTATATTCTATG	A. mellifera CDS
ATTTCAAAGACAAATTGCTATGAGAGCTCAT	A. mellifera CDS
TAGAAAATTTAATACAAATTTATAAATCTGC	A. mellifera CDS
CTATTTGGATATGGATGAAAGTTGATACATC	A. mellifera CDS
ATGTAAGATGTATTCAATTTGTATATTAGAA	A. mellifera CDS
ACATTTTATGATTTCAATTCTACGGTTCTCT	A. mellifera CDS
TAACAGTCATGGTTAGTGCAATTCCAACCAA	A. mellifera CDS
TAGAGTGCAAGTTGATGGACCTAAACTTAAA	A. mellifera CDS
ACTTGTGGTGTTAATATACTCTGTCTTCAAG	A. mellifera CDS
AGAGTATCGAGTGTTGTAGCAGCAGCATCGA	A. mellifera CDS
TGATCAAGCTGTATGGAATGTAGATTATTGC	A. mellifera CDS
TAATTAGATATATATCTTTATATGAGTTGAA	A. mellifera CDS
CTGGAAATCAATTGCATGTCATAGTATATCG	A. mellifera CDS
CAAGAAGTATAATCAAACGAACCAGAGGCGG	A. mellifera CDS
ATTAAGGAATGATTTCATACTACATAATAAT	A. mellifera CDS
GAAATCTTTCCACTGTTCTGAAATAAACGGC	A. mellifera CDS
CCATCCAGTTCGAAGAAGACACGAGTTCCGG	A. mellifera CDS
GCGAAGTCGAGCACTCGCTCGTCAAACTTCC	A. mellifera CDS
TCAAACTACTATGCGTTCCTCGTTAGAAATC	A. mellifera CDS
AATGAAACGATGAAAAATGTTCGAAAGAGGA	A. mellifera CDS
AAAAGTGTTTAATGTTGAAAGATGTAGTGTT	A. mellifera CDS
CAACGAGAGTAAAATCGAAGATCCTGTGATC	A. mellifera CDS
ACATCTTTCCATTATTCATGATTTTCTACTG	A. mellifera CDS
ACAGGATTAACCTCATCGTTTAAACCCTCTG	A. mellifera CDS
TAATAAAATAGAAGATAAAACTGATATTGAA	A. mellifera CDS
TCGCACAAACGTCAACGATGTATTTGCGGAA	A. mellifera CDS
ATGAAAAAACAAAATGATGAATTATTTTCAA	A. mellifera CDS
TGGTTCCTGGAATGGCCGAGGGAAGCCCTGC	A. mellifera CDS
AGATACGGAATCGCTTGGGGCGCTTTGGGCG	A. mellifera CDS
CCGCTTCCCTGTTCGAGGTGATGGTGTCAGA	A. mellifera CDS
TATGACCCCTCCGTGTCACGTCCTCTCTCCC	A. mellifera CDS
TTCTTACTATCATTATACATTTTATATATGC	A. mellifera CDS
GATGAAGGGTTGCGTACGTTTCTCTCGTTAC	A. mellifera CDS
AATCTTGTTCTTATCACGAAGTAGAACAGTG	A. mellifera CDS
CGTTTCGAAAAAAGTTGTGACGCGACAATAA	A. mellifera CDS
ATACCAGACGAATGAATGAATCTCACGACTC	A. mellifera CDS
ACGAAATCGGATCTCCTCCGCCCGTGTCCGT	A. mellifera CDS
AAAAACAAACCATCAATGAATTATGAGAAAT	A. mellifera CDS
TCAGAATACGAAGAAATCCGAGGGGATCGAC	A. mellifera CDS
CTAAAAAAAAACTTCCCAGAGATGGCTCAAC	A. mellifera CDS
ACATGCTGTATTTTTAAACTGCTGTCCAACG	A. mellifera CDS
CCTACGATTATTTTTCTACGCGTCCGTTCAC	A. mellifera CDS
CAAGGACAAGTAGAACATTATAGAAAAAAAC	A. mellifera CDS
TAGAAACGGGCCGGCGAGATCGTTCCGAGGC	A. mellifera CDS
GAGGACCTCTGGTTGCGCAGAAAAGCTTGAC	A. mellifera CDS
CTTTCTTGTACTTTTGAAGCAAATATCCGAC	A. mellifera CDS
TCGGGTGTAGAAAAAAGCAAAAAAAAAAAAA	A. mellifera CDS
ACCGACGAAATAGATCATTGGAATTGTTATA	A. mellifera CDS
TATCAATTACAATAATTCTTAATACTCACAA	A. mellifera CDS
AATATTCTTTGTGATCGGAATATGATAACAT	A. mellifera CDS
CAACACGCGAATAATCTCAAAATAATTCACA	A. mellifera CDS
ACAATCAACAACAACAGCAGCAACAGCAACA	A. mellifera CDS
ATGATTCCAAATTTTTCAATGTAAAATGAAA	A. mellifera CDS
AAGAGGGAAGAAACGAAAAGAAAAGAAATGA	A. mellifera CDS
TCTCGAGCGGAGGGGAATGAAAAGATTTCGA	A. mellifera CDS
AGAATTATCCTCTTTTGGCATATCGTGAAAA	A. mellifera CDS
TCTTAAAGGTGCTATGAAACATGGTTTAACA	A. mellifera CDS
CTTACGACCTCGAGGCGATCTTCAGGCCGAC	A. mellifera CDS
GATGGAGAGTAAATTGTCGACGGTGACGGCC	A. mellifera CDS
CACACACAAATGCGCGCACGCACACACACAC	A. mellifera CDS
AAAAAGCGGAAAAAAAACTTAAAAGGCAAAA	A. mellifera CDS
ATTGTGACAATATCAAACATAAATCTAATGC	A. mellifera CDS
ACGTGCTTGACACTTGCGATTATCGCGGATG	A. mellifera CDS
TTGTACCAGAAGTTGTACCAGAAGTTAAGCC	A. mellifera CDS
ACAATGAATTTTTAAAATAATATGATGTAAT	A. mellifera CDS
TTAATTGTAGCTGTATCATAGAAGTTAAAAA	A. mellifera CDS
ACTACTAGAGCGCATGCGCAAGCTTCTATCA	A. mellifera CDS
GAAGTCAAGGTACCCGTACCCGCGCCCTACC	A. mellifera CDS
TGTTAACAGGTGACAAATTAGAAACAGCAAC	A. mellifera CDS
AGTTGACGAAAGATCAAGCCGGGACAATCGA	A. mellifera CDS
CAAAGTGTTACATAATAATATTTGTTGGTGC	A. mellifera CDS
AATGCAGCTGCTGTAATGAACCACGGTGTAT	A. mellifera CDS
AAAACGTATTTTATTTTTATAAAAAAAAAAA	A. mellifera CDS
TATCCGCTGGAATAGCTGGAATTGTGGAAGC	A. mellifera CDS
ATTACGTGCAGATCAGATCCTATGGCTGCAG	A. mellifera CDS
TATACAAAAGCCGTCATTATTGGTATAATAA	A. mellifera CDS
AGTGCAGAAAGAAAAGAAAACGTTTCTCACC	A. mellifera CDS
AAGAAAAAAAAAAAAAATTGTTAATCTTTGT	A. mellifera CDS
TTACGTTTACCGAAGGATTTCGTTCCCGGCA	A. mellifera CDS
CAAACAAACTTTCTTTAATTGTGGGCATGAC	A. mellifera CDS
AAGAATGTGATGATGAAGCAAAACGTTTAAT	A. mellifera CDS
CGCGAGAAGCGAAAAGTGCGTTCGTCGTATC	A. mellifera CDS
TCGAATTCGGGCGGATTCGGCTCGCGATCTC	A. mellifera CDS
AATTGGGGTCCATATTTGGTAAGGATAATAA	A. mellifera CDS
AAATGTTTGTGAGACTCTAATTAAATGTATG	A. mellifera CDS
AAACTTACTTAGCCTCGCTTCAATATTACTA	A. mellifera CDS
ATTTTTTTCTACGAAGTAAATTCTTTTGGTC	A. mellifera CDS
AAAGACGAAGTATAACCCATACTATTCAGGA	A. mellifera CDS
GAGCGTGTAATAGCTGCTGGATCAGCACCTC	A. mellifera CDS
AATATTCAAAATAATAAAAAAATTTTAATAA	A. mellifera CDS
AATTTATTGCTTTTATGAACGGCAATAATTG	A. mellifera CDS
AACGGAAGAAAGGAGTATGGGATAAGGATTC	A. mellifera CDS
CCTTCAAGATCACATATACAGCCATCGGAAA	A. mellifera CDS
ATATACACATATACAATCTAACGATGGCGCT	A. mellifera CDS
TATATAATTTTGAGCTATTAGAAAACGACAA	A. mellifera CDS
AAATGATACCATCAGATACAGATATTCTTGT	A. mellifera CDS
AACCATATGCATTTACGACAAAATCCTTATA	A. mellifera CDS
ATTAGGATTAATTCCTCGTATAAAATTACCT	A. mellifera CDS
TAATGATCCGAGCGCGTACATTGATCGTCGA	A. mellifera CDS
AGTATAATTAATGCTATATTTTAAATAGATA	A. mellifera CDS
AAAAGTTCGTTGATAGCGGCTCTGGCTTTTC	A. mellifera CDS
AGGGAGAGTCGAGGAACGACGATTGTAACGA	A. mellifera CDS
AACGAATCGTTTGGAAATATTACACTAATTG	A. mellifera CDS
AAGAAAACATTGAATCTTATTCGTGTCGATG	A. mellifera CDS
CCACTCTTCAAACCTGCAAAAGATCAAGAAC	A. mellifera CDS
ATATTAGTGGAATGCCTTTGTATGTTTTGGA	A. mellifera CDS
AATGGCGGATTACAATGATAAGTGTACAGAA	A. mellifera CDS
ACGAAATAAAGTAAAGAATTTATGATCTCGA	A. mellifera CDS
CTTCTTCTTTGTTGTGGAACCGTTGGAGGCG	A. mellifera CDS
TCATCATTACATTGTAAATTTTTTACGATGA	A. mellifera CDS
AAGGCTTCTGCAAAGTTGGTCCCTCAGCGCC	A. mellifera CDS
AACAATAAGCAGCGTTAAACGTTAGACGAGT	A. mellifera CDS
ATTTGCTATGTCAAAAATTATATTAAAAATA	A. mellifera CDS
AAGTAAATAAGTTTTTGCATTTCTTTCCTCG	A. mellifera CDS
CAGAAGAAATTCAAGATACACACTTTTTTGA	A. mellifera CDS
AAAAAAAAAAAAAAGTTTCGTTTCCTGTGAG	A. mellifera CDS
AGTTAAATACAGGTATATCTATTTGGGAACT	A. mellifera CDS
ACATTTATAAATCCATTTACCTTTTGCGCAA	A. mellifera CDS
CAAAGCGGTATGTAAACTTTCCAAAGAATCC	A. mellifera CDS
CAGCAGCAGCAACAGCAGCAGCAACAACAGA	A. mellifera CDS
ATCCAATATATCAACCGTTCCGAGTAACACC	A. mellifera CDS
ACCGGTTGAAAGGATTTGGAAAGAAACCGCG	A. mellifera CDS
AAAGAAAATCGAGAAATTGACGATATCAGGA	A. mellifera CDS
AAGGGGACAATTTAAAGGTCTAGGAGGAGAA	A. mellifera CDS
CGAAAGCTATGGAAGTTAATGAAGAAGTTTC	A. mellifera CDS
CGAAATGAAAAATATTTGTCTCCCTATTCAC	A. mellifera CDS
AAATACTAAAAAAACAGTACAACGGATTTAT	A. mellifera CDS
AAAAATTAACATAAAACTAAAAATCTAACAC	A. mellifera CDS
ACTATATACTAATACTATATACTATACTATA	A. mellifera CDS
AAATAGCTCTTGAACATTATAATAAGGCAGT	A. mellifera CDS
ATGAAGATGTTTCGAAGAAAAAAGATAGGCC	A. mellifera CDS
CTCTCAAAAATGTCATTTTTATGCGCAATCA	A. mellifera CDS
AATATATTTATTACGTAAATTATAATATAAT	A. mellifera CDS
AAAAAAAAAACATTATGCGTACACCGTTGAC	A. mellifera CDS
ATTATGTCAAGAGAGTGTATATATACGGAGG	A. mellifera CDS
ATTTGGAAATTATATTGGTCCTGATTTGGCT	A. mellifera CDS
TACGATCCAAAGAATCAAAGATGCGAGTGGC	A. mellifera CDS
CGGCCATTATTTTTGGTCTGCCGCCCGGCCG	A. mellifera CDS
AAATTTATCTAATATTTCTAAAGAAATCGAT	A. mellifera CDS
ATTTTAATTTTCTCAGTAATACAATAAACAC	A. mellifera CDS
AATGGCCACGATTCGAGTACATGAGGATCAA	A. mellifera CDS
ATATCGGTATAGAATTACATATATTAAGATA	A. mellifera CDS
ACAGAATTTAATAAATTATCGAAATATAAGA	A. mellifera CDS
GCTCCTCCTGCTATTTCTCGCCACGCCACGC	A. mellifera CDS
CAAAGAGGACAAACTCAAGTTTTATGTACAG	A. mellifera CDS
TTCCAATACATAAGTGGCAATATCATATAGC	A. mellifera CDS
ATCCAAGAACAATGGTACCAATATTTGTGAG	A. mellifera CDS
AATCTGTTAAAACAGTGGGGAGAGGCTACGT	A. mellifera CDS
TAAATCACGTGGCGTGGTGAAGATCAAGGAC	A. mellifera CDS
ATAGATTAAAGGGTTTCGTTCAGATGGAAAA	A. mellifera CDS
AAAATAGAAAATGAAGAAGAAATATTACGTT	A. mellifera CDS
ACTTGGAAGCCGCTTCGGTCACAATAACTAG	A. mellifera CDS
ACGAACAGCTGCGAGAACGATGATGTTACGT	A. mellifera CDS
AAAGTCCTTAATCTCTTCCTAAATGTCATTA	A. mellifera CDS
AAAAAAAAAGATTTTTACAAGGGATAAACTC	A. mellifera CDS
CAGAATGATTTGATGAACATGTAAAAATGTA	A. mellifera CDS
AAAAAAAGCGGAGAACTGGGCTTTTCTTCAA	A. mellifera CDS
ACGTAGATTTAGTAATAAACTTACCTCATGA	A. mellifera CDS
AAAAAGCAAGAGAGCGTACGAATGAGCAATT	A. mellifera CDS
AATTGTATATTTTTTAGACATTAGGCTAGGA	A. mellifera CDS
TTCCAAAATAGAAGCTTTATATTGCTTAAAA	A. mellifera CDS
TTATGGAATTTGTAAATTTTTTAAAAAATCC	A. mellifera CDS
CATGAAAATTTTTCCAGTCAAATTGCACAAA	A. mellifera CDS
ATCAATGGATCCTTCAGTCGTTGCCTCGCCT	A. mellifera CDS
GCTGGCCGGAATCCTGCGTGTGGAAACAACC	A. mellifera CDS
AGAAGAAATAAAAAGAGCTTAAAATAATTTA	A. mellifera CDS
CGGGCCGCTGCACACTTGTGTGAAAGATTAA	A. mellifera CDS
CAAGTGAAAACAAACGTATATCATATGAAAC	A. mellifera CDS
ATTAAAAAATTGTCAAAATGAATTAGCTAGA	A. mellifera CDS
CTAGAGAACCATCAATTCAAACAGAGACATC	A. mellifera CDS
AGGACGTCCAACGCTCCTCGCTCCTCGAAAA	A. mellifera CDS
CGTGCAATCATCGATATTGGATGCTGAACAA	A. mellifera CDS
AAGAAAGGAAACTTAGAGAATTATCGTGTGG	A. mellifera CDS
TTAATCGCGGGTGGACGTCAACGGTGAGGCC	A. mellifera CDS
AATACTTTCTTATAAAAAAATTCCCCATGAT	A. mellifera CDS
ACTCTAAACTGTTTGATTGAATGCCGTTCGA	A. mellifera CDS
TCGGTAGGTCTTTATGATTGTATTATATTAA	A. mellifera CDS
GCCTCAAGACGCCCACGAGCTTGCTTATCGC	A. mellifera CDS
AACAACAGTTCTGGTTAATTTAACTTTCGTG	A. mellifera CDS
ACTTAAACGCGAAATACGAGAAAGCTATGGA	A. mellifera CDS
ATTTAGTTCCTCCAAAACCATGTCGTGTACC	A. mellifera CDS
CAATATCAATTTATAAAAAGTTTCTAGTTTA	A. mellifera CDS
TTAATTGACAATTGTTAAAAAGAAAAAAACA	A. mellifera CDS
CTAAAAATTTTTCAATTTTTAAACTAAACTA	A. mellifera CDS
ATGTTTGTAATATCCATGGTATAAATATAAA	A. mellifera CDS
TATGTTAAAGAAGTAGATTCTAAAAAGATGA	A. mellifera CDS
ACGGTACACACAGTTGAAAATATATTTATTA	A. mellifera CDS
TGGAAATTATTTGAATGGAATTTATCGGAAC	A. mellifera CDS
AGGGGGGAGAGAAGGAGCAGTTGTACTTTGC	A. mellifera CDS
AATATTCACTACAAATAGAAGGTAGTTGTAA	A. mellifera CDS
AGATTTTACCTCGAATTATGGCATTCAGACG	A. mellifera CDS
AATGAAGTGGAGGAATAGCAAAGAGAGGGAG	A. mellifera CDS
GACCGGATGTCGTCTCGCTCGCTTTGTTTCC	A. mellifera CDS
ATGAAAATTCACAAAATATTGATATATCCGA	A. mellifera CDS
ACGAAACGAGATCGATGACTCGTCTGCTTAG	A. mellifera CDS
ATTTAAAGGAAGTAAAATTAGAATTCTTTGG	A. mellifera CDS
ATCCGCCATTCGAAGGGACTTGTCCACCAAT	A. mellifera CDS
TTCGTAAGTCCGTAAATAAGTTTCTCGACAA	A. mellifera CDS
CAAACGGGGATTTGCATAACCGATATATTCC	A. mellifera CDS
AAAAAAGGGGGGTATCGATCGCTTCGACGAC	A. mellifera CDS
AATATTTTTAATTTTTAATTTTAATTTGTAA	A. mellifera CDS
ATATATATATTAAAGATTAGATATCAAACAG	A. mellifera CDS
CAATATTATGGATACATTTGTTTAGAAAGCA	A. mellifera CDS
AATGCCATTCTCTTTTAAATCAAACTCTAGA	A. mellifera CDS
CAAACAACAGTTCACCAGAATCCCAATGGAA	A. mellifera CDS
CCAAGGCTAATAAGAAGTTGGAAAGTTGGCC	A. mellifera CDS
CTTATCCGGCCCAACAGCAGCAGCCGCAGCC	A. mellifera CDS
AAGCTTGGCCCATAGAATGGCAGGATAAAGC	A. mellifera CDS
ACCATCATTTGGATATTTTTGTGAAGCTAAA	A. mellifera CDS
CCAGCTGTAGCACGATGTTTAGCCACTATTC	A. mellifera CDS
TAAAGAATAATAAAGAACGTAAGAATAAACA	A. mellifera CDS
AGCGATATACGAAATGACAAAGCGACAACTA	A. mellifera CDS
TATTCAAGAAGAAGCAAATGTGGTATGATAA	A. mellifera CDS
AAACTTATACCACAACATTATCAAGAAGAAA	A. mellifera CDS
CGTGCCGAGTTTCAATTTGACCGGGGCCCTC	A. mellifera CDS
AAAAAAAAAAAACAATCATTACTCATTAAAA	A. mellifera CDS
AAAACGATATTCAGATTCTTCTTTACAAGGA	A. mellifera CDS
TATCAAGAATTTGTGCAGAATTTTTAATAAA	A. mellifera CDS
TGGTGACGATAGAAGAAATGAAATCTGAATC	A. mellifera CDS
ACAGCCTCCTTTCAAAGCAATTTACAGAGCC	A. mellifera CDS
ATTTACCTAATACAAATACATGTGATATTCA	A. mellifera CDS
ACGAAAACGCGAATTCACTCGCGCGGAGGAA	A. mellifera CDS
ATTTCTCGATTGGGAAAACATTGTACCAATA	A. mellifera CDS
CTACCGGCCTCGTCCCTCGGCTCGGGTCACG	A. mellifera CDS
AAGTGAGAGAGAGAGAGAGAGAGAGAGACAG	A. mellifera CDS
AGGCTGCATGGTAACCTAAAGAAAAACCAAA	A. mellifera CDS
TATCACCATTAGTATCCTTAATGGATGATCA	A. mellifera CDS
AGCGGTGCTTTTTCTACTTGTAAACTGTCAA	A. mellifera CDS
CGCTGCAGGAGTGTGCTTCTATTTTGGTAAA	A. mellifera CDS
ATTTCTTTACTCTTCCGGATTCGGCACCGCC	A. mellifera CDS
CGACTCATTGTCGTCGAACAATTTTCTCAAA	A. mellifera CDS
AAAGTGAACATGGATTTGCTCTCGATTGCTA	A. mellifera CDS
AGAACAATGGCCGACCGGCCGGAAGAACGGC	A. mellifera CDS
AGAGGGAAAAAGGGGGGAGGGAGGGGAGAAA	A. mellifera CDS
AAGATTTTGTCCTTTCTTATGACAGAAGAAA	A. mellifera CDS
CCGCTACGTTTAACTACAGAATCGCGGATTC	A. mellifera CDS
TTATGATCAAGCATTTCAATATTATTATCAA	A. mellifera CDS
GATTCAGTAACTAGTCTTGAAGAGACATTCC	A. mellifera CDS
CGCAAAACACGTCAAAATTATGTTGATTCTA	A. mellifera CDS
CGACAGGTGGATATCGACACGAAAGGGGAAA	A. mellifera CDS
GACCTTAGCATTAATGGAATAGCTCTTGATC	A. mellifera CDS
GTTAAAGGTTTGTTCTAAAATTTCCTTTCCC	A. mellifera CDS
CCTCAAGCTGTGCTTCTTGCCTTATTTTTTC	A. mellifera CDS
ATATACAGGTTATAAAGGTCCCAGTGCACAT	A. mellifera CDS
TCAAGTCAAAACAAATGAAAATGTTGAGAAA	A. mellifera CDS
GAATAAAGATCGATCGGTAAGTACAAATATC	A. mellifera CDS
CAATGATCGACTCTTCGTTTATGAACGATTC	A. mellifera CDS
AGAGAGACTCGTAATTAGCTTAATCGTATTA	A. mellifera CDS
TTATTATTAAAGGAACTCAGGTATATAATCC	A. mellifera CDS
AAAGTACAAGTAAGAGTTAGATTTGCTCCTA	A. mellifera CDS
CAGTGCCCCCACTGCGAGGAAAAACAGGCGA	A. mellifera CDS
ACAATGATTTATGGATTTTCGCTTTATTTGA	A. mellifera CDS
CCACGGCTCAAACGACTCACACGATAAACGA	A. mellifera CDS
CATATATTAAAAATTATGAAAACTTTCGAAG	A. mellifera CDS
TTCGGGGAACGATATTTTCGAAGGGAATCAA	A. mellifera CDS
TACAGCACCTCCTATGGAAAGTAGAAAGAGA	A. mellifera CDS
AAAATTTAAAATGGAAACGAAAGTCACTTCC	A. mellifera CDS
TAATAAATTAAATATATAATAGATTTTCTAA	A. mellifera CDS
CGGTTACATGGAGATCATAGTGTCGGCCAAC	A. mellifera CDS
TTTGAATTGGTTATGGTATTGGGGAGAAACA	A. mellifera CDS
TATCAGATCCTGTATATAGCTTGCATTCTAA	A. mellifera CDS
TATTAAGTGATGCAAGAATGGATGATGTACC	A. mellifera CDS
ACTGGAGAAGAGAGCTGTACATTTTCACGAG	A. mellifera CDS
GATACATTAACGCATTTATTGAAAGCAGCTC	A. mellifera CDS
ACGATCGCGTAAATGGTCCCATGGTCTGTCA	A. mellifera CDS
AATTGCAATTCATTCAAAGGGTAATCAAACT	A. mellifera CDS
CTTCGTTGCTCCCCGAACGGCCCTTACACGA	A. mellifera CDS
CTTGGAGAAGTCCCGCGACGGTTCCTATTAC	A. mellifera CDS
TCGCGGAGACAAAGAGGAACGTTCGCACAAA	A. mellifera CDS
CAAGGGCAGCAAGAGCCACCCCTGTCACTGC	A. mellifera CDS
CACACAGTTGGAAAATGCAAATATATGGGAA	A. mellifera CDS
ACTGCAAAAGTTGGAGATAACAATGCTAGAA	A. mellifera CDS
CGTCCTGAATCGGCTCACGTTGTCCGGCAAC	A. mellifera CDS
AGAAGAGTAACTCATAACGAAGTTGAGAGAC	A. mellifera CDS
AGAGCCGGCTTACTACGCGGCGAAACGCTAC	A. mellifera CDS
ACAAGTTGCAATATTGATTTTAATAGTGCGA	A. mellifera CDS
CCACGTTGGAGGTGGGGTTCCCGGCGCGCGG	A. mellifera CDS
CCGGACGGCCGCGTGGTGGACACGCCGGAAG	A. mellifera CDS
ATCTTTTTTTTTTTATTTTAAGAAGAAGAAG	A. mellifera CDS
ACAAAATCATCCAGAGCTCTAAAGAGCTTCG	A. mellifera CDS
TATCCAACGTTAACCTACATCGGGGATGACA	A. mellifera CDS
CCAATCTGAAACGGCCGAAACGCGACGGGCC	A. mellifera CDS
CTTAATGGATTTCAAGACATCAATAAATTAA	A. mellifera CDS
CAAGAAGTACGACTCGATCGCGCACAATTAC	A. mellifera CDS
TTGCTCTCTGCTGCTCTCTGCCCAACGTGTC	A. mellifera CDS
AAGATTTAATAAATTTTATACATAGTTTACA	A. mellifera CDS
ATATGGCAAAGATCTTGAATCAGCTGAAGAA	A. mellifera CDS
AGAAGCAAGTTTACCGACTTGAAGGAAAACC	A. mellifera CDS
AAAATATGAAAAATTCAATATAGAAAACATG	A. mellifera CDS
AAAAATATCGTAGCTTTTCGCGTGCGGTCCA	A. mellifera CDS
TAGGACACATTCCACGCATCCCAGGCATCGA	A. mellifera CDS
CTGAAGATAAAATAAAATTATTATTACAATA	A. mellifera CDS
AAAGAACAGGAAGAGCGTGTTATCAGTTCGA	A. mellifera CDS
AAAATTTCGTTTATCATATTCGTCGAAAAAT	A. mellifera CDS
ATCAGGTGAACGAAATGAACCTACGGTCCAA	A. mellifera CDS
ACATATATACATACATATATGTCGCACGGCC	A. mellifera CDS
CCAATGGAAAGATTTAGGTTAGAACAGAAAG	A. mellifera CDS
AAAAGAAACTATGAAATTGGACGAATGTTTC	A. mellifera CDS
AGCCTTTCAATGTTTCACGAAGAACAGGAAA	A. mellifera CDS
AAAATAGAAGATATTGCAACTTCGAATAAAA	A. mellifera CDS
ATTATGATAAAACTGTAAAAATATTGGAATA	A. mellifera CDS
ATTCTAGCAGAAGAAGGTTCTTCATTGGTTG	A. mellifera CDS
ACCGTTTCTCGAACGAAAACGGTGCGAACGT	A. mellifera CDS
ATTTATAATTGGGAAGTAAAACGCAGACAAG	A. mellifera CDS
CAAAAGAAGAAAATGTTTTAACCGTGAGAAA	A. mellifera CDS
TTTCAATCCGGAGAGAAGTGCGTTCCAAAAA	A. mellifera CDS
TTCGCGAAGGAAATTTTTTTAAAGGGATACA	A. mellifera CDS
CGAAGGATGGGGTAATGACGAAGAATTAGGA	A. mellifera CDS
CATATAAATATGAAAGATTTACTAATTAAAC	A. mellifera CDS
TTAGTGGTAGAAAATTTTGGAACTGTCATAC	A. mellifera CDS
TGGACAAAGCTATCCCGCCGTCCACCGCGGC	A. mellifera CDS
ATAGTAATTAAAATTCTCTTTTTTTTTTATA	A. mellifera CDS
TATCCTGGTAGAATGGCAGCTGACGACCCCC	A. mellifera CDS
ATTAAAAAAAAAAAACAAAAAAAAAAGAAGA	A. mellifera CDS
ATCCTAGAACTAAAAACTTTTTGCAAGATCC	A. mellifera CDS
CAAGAAAGTGATTTAAAAGTTATTAGATCTC	A. mellifera CDS
TCTGCAACAAGTTGGAACTGTTTCACCAAAA	A. mellifera CDS
AGAAACCAATCAATGGACTATTATAGCTCCA	A. mellifera CDS
TTTTTGCCTGGCACGCGTGTATATATAACAA	A. mellifera CDS
ATGACGACATTCCTTTATCATGACATTCTCG	A. mellifera CDS
TTATTAAAAGAAAAAATAAAAGTGGAGGAAA	A. mellifera CDS
TTCATTTTACGATCACCTTTTACGGGCCGTC	A. mellifera CDS
AGGAAAAGTAGTGCCAAGAGCGTAAAGAAAA	A. mellifera CDS
CAAAGTATATCGAAGAGTAGTGACAAGGTAC	A. mellifera CDS
CGTCTTTCTTTTCATTCCCGAAACAAAAGGC	A. mellifera CDS
TAGATAATAAGGAAACAGAAGAATCACTTAA	A. mellifera CDS
AAAATAATAATACGTTCAAAAGAATTAAAAC	A. mellifera CDS
AAATATTTAAAAGTATAAATTAAAAAAAAAG	A. mellifera CDS
ATGAAATCATTGGATCCATGCACACATACAG	A. mellifera CDS
TTATAATAATTTTGCGCGTTTTTCTCACTTC	A. mellifera CDS
ATTATCAAGGACTTATTATTTTATGGCGTAA	A. mellifera CDS
ATATTAGTTTAATATAATAATTACATATTAA	A. mellifera CDS
ATCGATTATTGAATCTTCTTCATTGTGATTG	A. mellifera CDS
ATTTAAACGTGGTACATCGATGCGTGGATTG	A. mellifera CDS
TTTTATTATGTCACAAATCTCATAACTATTC	A. mellifera CDS
TATATAATTATAGAACAAGAAATACATATGA	A. mellifera CDS
ACAACCGAAGCTTGTGGTAACTGTGCGAAAA	A. mellifera CDS
AGGAACGAAATTACGCTTCCTATTTCCGCTC	A. mellifera CDS
ATTCAATTTGTGTTCATATATTCCATTTTAA	A. mellifera CDS
CGGTCGAAGAATCATGTATATTACAAGAACC	A. mellifera CDS
CTACATCAACTACTACAACTCTTATCCCAAA	A. mellifera CDS
AAACTGCATATTCTTACTTTTATGAAGCATT	A. mellifera CDS
AATACGCATCGCTTGCATATTTCATATGACG	A. mellifera CDS
TATCACGCGTATAAATTCCCATAATCGACTA	A. mellifera CDS
ATTGCACGTATCAAGGGATGCTTATATAGCC	A. mellifera CDS
TATAGATGCATAACTATTATGAGAGAAATAA	A. mellifera CDS
AAATATAAAACATCTAATATGTATCGTAATA	A. mellifera CDS
CTGCTGGATTATCAGATTATTCTTAATTTCA	A. mellifera CDS
ACGAATCACGAGAATCCGGTGACGGCCGGCG	A. mellifera CDS
ATTCCGATATTTCTCTATTTTTATTTTAGTG	A. mellifera CDS
CACATGGTTTCTCGGGTGCTGATATAACAGA	A. mellifera CDS
CAGATTATTACATAATACAGTAAGATTTAAA	A. mellifera CDS
ATACAGATTAGATACACAAGGAGTTTGGGCA	A. mellifera CDS
AAAAGCGACGCAGAGATCGGAATCTGGTGGC	A. mellifera CDS
AACGAGCTCGGGGATCTCCTCGACGAACATC	A. mellifera CDS
ATAATATCAAATTAAAAAAATTATCTTCAGA	A. mellifera CDS
AAAAAAATTCATGAATTAGAATTACAATTAG	A. mellifera CDS
AGAGCTGTACGAGGATCCGACAAAAATGAAA	A. mellifera CDS
ACTTGGTTCAGTTTGCTTTCTAATATTTTAC	A. mellifera CDS
ATTGTTCCCTCGAGGCGTGCAAAATTATATC	A. mellifera CDS
CAAAATGAAATATCAGAATTTCGAGACAGTA	A. mellifera CDS
TTTTACAATTACAGTACATCACCATTTTCAA	A. mellifera CDS
TGGATTCGAGGGGTACGGCAGGATCGGAGGC	A. mellifera CDS
ATTCACATTGGCTCATCAACAAATGCAAGCA	A. mellifera CDS
ACGAAACGAGGATAATCCTTGATGGCGTGGG	A. mellifera CDS
CAATCGGTTGCGATCGGTTTTCGAATACGGC	A. mellifera CDS
AATTGTGCAATTGCAAGCAAAAAATAATTAA	A. mellifera CDS
AATTTTTATTCGATTAAAAATAAATTCTTAT	A. mellifera CDS
CAAGTGGTAGCTATGGATGGAGGGGGGTTGA	A. mellifera CDS
CAAGCTTTAGTTAATATTTATGCTAGCCTTG	A. mellifera CDS
CTCTTCCATTTGTTGCATTTTTTGGTGTACA	A. mellifera CDS
TCTTTCCATGTAGACAAAAAGATTTTACAGA	A. mellifera CDS
ATATGATATATATAAAATATATTCATATAAT	A. mellifera CDS
ATATATTTGGTATTATAATATTTTTTCAACT	A. mellifera CDS
CCTAAACTCGTTCGAATGGATCGACTATTTC	A. mellifera CDS
ATATCCAAAAAATTGAACATACAAATATATC	A. mellifera CDS
AGGGATCGTTTCGAAAAGGCGAAACTTCGAG	A. mellifera CDS
AAGCAACAGGTGGTCTTATCCACGTGTCGAT	A. mellifera CDS
AATGCGAGACGATTGTGCGTAAGAAACTCGC	A. mellifera CDS
ATAAAATTTTCTGAAGTGGGTCAGCGTGTCA	A. mellifera CDS
ATTGGTTGAAGCAGATATACCTCAAGCTCAT	A. mellifera CDS
AAATTTTATTAAATAATAAAATATGGGTCGT	A. mellifera CDS
ACTAGAGGTTACTAAGAAAAATGAAGAGGCT	A. mellifera CDS
AAAATAATGCAACGAAATGAAATGTATAAAT	A. mellifera CDS
CCGGCTCCGTAACCGCTCTTACGCGTGTTGC	A. mellifera CDS
AACCTACAGATAATCATAATATAAGAAATTG	A. mellifera CDS
ATTAAGAATTTTTGGAAGCAAAATAGTGTAA	A. mellifera CDS
ATTACATAATATCAAAGATCGCGATTGGCAG	A. mellifera CDS
AATATCATATAGATATCAATCAGAAGAAGTA	A. mellifera CDS
ATGGCTAGTACGTCGAATATTATAAAATCGA	A. mellifera CDS
CGGGTAATGAAAGATTTATACTATAATTAAA	A. mellifera CDS
AAACATGCCGATAAAATCTCCGATTGTAAAT	A. mellifera CDS
TATCGAGAAATAATTTCTAAGAGATATTCTA	A. mellifera CDS
AGTATGATATAATTACAAAATAAAATATCCG	A. mellifera CDS
CACATGTGCACGCGCGAAACTTTGATGATCG	A. mellifera CDS
TTTATCACACGGTTGGTATCGAGGGAAACAC	A. mellifera CDS
AATTTTAGAGGTTTTCGATTATGTAATGCGC	A. mellifera CDS
CTGCCCAGATGCTCCAATGATACTTGTTGGA	A. mellifera CDS
AAAATTTATTATGATCTTATTCGAGTGTGGA	A. mellifera CDS
ATTTTTTTTCATTCTTACAAATGCTATAGCA	A. mellifera CDS
AACAAACGACTTGAATATAACCAATGCAAAA	A. mellifera CDS
TAAATTTTCAATTCGATTGATTTAGATACAC	A. mellifera CDS
ATATTATTGACGATTGAAGATGTACTTGCAT	A. mellifera CDS
AATACCCAACATCGCGTTTCGTGACCTGCCT	A. mellifera CDS
TTTTAGAAAATTACCAGCGATGCAATGTATC	A. mellifera CDS
ACAAACCATATAATGTATGTTACTAAATTTG	A. mellifera CDS
AATACACTTAAATTTCCACTACGGGGAGCCA	A. mellifera CDS
AAGATTGGTCTTGCATTAGATCTTCAAGCTT	A. mellifera CDS
AAAAATTTTGGAAAATTTAAGCGAAGAAGCT	A. mellifera CDS
CGCGCGTTAATTTACGTGTTCGTAACAGAGC	A. mellifera CDS
TCGTACGTCTTTCTTTCCGGATATTTTGGAA	A. mellifera CDS
AAAGTGCCGAAATCGCAAAAGAAAACATTTG	A. mellifera CDS
TAAATTATATTATATAATCGAAAGAATTGAA	A. mellifera CDS
CGTGGTCACGAGATTGTATTGGTCACCACGA	A. mellifera CDS
ACGTGTCTTTCATCAAATACATATGGAATCT	A. mellifera CDS
CATCCTACCTTAAATCTTTTTGCTGCTGGTC	A. mellifera CDS
TTGCATCAATGTCCCTAGAATTGCTTAACGC	A. mellifera CDS
TATTTATCGTTTAAAAGTATCGATCATTTTC	A. mellifera CDS
AATATAAAACATTGTATAAGAATGTAAAAAG	A. mellifera CDS
ATATCGTGGCTAAATCGGTGAAGGAAATGGC	A. mellifera CDS
TTAAAAAAAATCTCGGAGAGATTTAGCAACA	A. mellifera CDS
TCGGATTCATGTATTAAAAATTTGCGTTGAA	A. mellifera CDS
TTGGATAATGTTAATGCATCTGTGATAAAAC	A. mellifera CDS
ACTACGTAAACCTGTCGAAATAATCAATCAC	A. mellifera CDS
ATATAGATTGTTATTAGGGATGTGAAATATC	A. mellifera CDS
AATAGAATCTTGAAAATGAATACTTTAATAA	A. mellifera CDS
CAAAAGTCGAATTCAAATATTCAATTAAAAA	A. mellifera CDS
ATAAGAGAAGAAGGAAAAGAAAATACATTCT	A. mellifera CDS
CAATAAAACATATAACAACAGAAAAATTACA	A. mellifera CDS
TACATTATTTCGGAAAAAAATGCTATACCAA	A. mellifera CDS
TGACACGCTGGCATGGTCAAAGATGCTAGCA	A. mellifera CDS
GTACGCGAAACTCACCGATCAGCCGGTAGAC	A. mellifera CDS
ATTTGTTGTATGTAAATGTAATAAAATGTAA	A. mellifera CDS
AACAACAATAACAACAATCTTGAAAATCCAG	A. mellifera CDS
AAATGTCTACGATACATTTAATCGGTATTAG	A. mellifera CDS
AAAAGTGATCATCAATTTCAACTTGATATTA	A. mellifera CDS
TCCGCCTGCCGTCGGAGGCGACGCGACGTGC	A. mellifera CDS
ATATATTTGCGATATGAAAGAAAATCGATTA	A. mellifera CDS
ATTCCCACCATGTCCGAAGAAGGAAAAATAC	A. mellifera CDS
CCATTCTTTTATCATGGCGTTGCTCAAAAAG	A. mellifera CDS
AAGAAAAATAGATACAAGAGCTACTAAAGGT	A. mellifera CDS
AACATGGATAATTTTTCCAAAGCCAGTACCA	A. mellifera CDS
TATGTGTACTGATATAACGTGATATTAGTGA	A. mellifera CDS
TACTGATGCGGGACTTCGTGGGATTCAAAAA	A. mellifera CDS
CACAATTGTTCGAGCTGTATCGTCATGGACA	A. mellifera CDS
ATGGGTTGGAAATTCAAATGTTGGATCCTTA	A. mellifera CDS
TAAGAGAGTTTTCGATCGATTATTTTTCAAA	A. mellifera CDS
CATCACCAAAGAAGTGGTATTTGCAGTAGTA	A. mellifera CDS
AAATACATGTTATAGAAATATATATATGGAA	A. mellifera CDS
GAGCTATGACAGCATGTATATTGAATGTTAC	A. mellifera CDS
AGTTGAAGGACGTTGTCGACGAGATCGTGTC	A. mellifera CDS
CCTACCCTATGCTGTGGGAGAGGATCAAGAA	A. mellifera CDS
AAGCAAAGATGATACTGCTGCTCGCCTGCCT	A. mellifera CDS
CGTCAGAATTTTTCAACTGCGGAATAATTTC	A. mellifera CDS
TGAAGGATTAAATTACTAACTTTATAGTATC	A. mellifera CDS
AAAAGAGCTATTCCATTGAAAGGTGGTCTTT	A. mellifera CDS
CCTGGCCATTTAGATAGCAGAAGAATTGAAG	A. mellifera CDS
ACGTGGCCACGAGATTGTAGTGATCACCACG	A. mellifera CDS
CTCTCGAGACACCGTGTTTCACGGCAGACCG	A. mellifera CDS
ATAAGTTAATAATATATCCTATAATTTCTAA	A. mellifera CDS
ACCTCCACTCTTTGTCGTTAGTGGGGTGAGA	A. mellifera CDS
AATCGTTGAACATCGACCAGAACCAAGAATC	A. mellifera CDS
TCCCATTACATGGATCATTGTTGATTGTGAA	A. mellifera CDS
ATCTTTCAAATGATATATTTGCATCTCTTCA	A. mellifera CDS
AAAATTAAAATTGATGGTATAGATATAGCAA	A. mellifera CDS
ACTTATGCATCAGCACCGATTGAAATTAGCT	A. mellifera CDS
ATCAAATGGTTAAGTGTGATCCAAGACACGG	A. mellifera CDS
CACTAATGTTTTTACGCGCATTTTGAAAGCA	A. mellifera CDS
AGAATTAGCTGGTGCTAATAATACTTTTCTA	A. mellifera CDS
AAATACGAACAGAGTCTGGAGTTTGGATACC	A. mellifera CDS
CCACGAAGTGCAGTCGGTCACGTACGCCGTA	A. mellifera CDS
TACGGAGGAAATGATGGAAATATAAGGATCA	A. mellifera CDS
AAACATCAACACAATGTTGTTGTTCAATTAG	A. mellifera CDS
AATGTGTAGACATTTGGTGTTCACGGCTGTA	A. mellifera CDS
AGAGAGCGATATATGGAAGGCTGACGATGGA	A. mellifera CDS
AAACGGCCGCCCGTTCCCAGCCCCAGGTGGT	A. mellifera CDS
ACTCGATGGTGTTGGGATCGGTTTACGTTTC	A. mellifera CDS
TAAAGAGAAGAGCAAAAGCAAAAGAGAGAAA	A. mellifera CDS
AGATTCGATTAACAAATCACAATCACTTATG	A. mellifera CDS
ATCGTTACAGTTCGTTAGCGTTGGAAATTGC	A. mellifera CDS
AAAAGTCGCATCAGCCATTGTAATCAATATG	A. mellifera CDS
ACCTATCGTCAACCTTCCAAATCCATTCGTA	A. mellifera CDS
ACATTATAATTAATCCTCATGCTATTCCATC	A. mellifera CDS
TTGTCCACTTGACACTGGTAGCTTTAGTCTC	A. mellifera CDS
GATAAAATAATTAATGAGAATAGTAATGCAC	A. mellifera CDS
TAATTTTTGTCCACGTTGGAAATGTTTTATC	A. mellifera CDS
AATGGAAAGGAGAAAATAAAATTGAAAAAAT	A. mellifera CDS
AATTCGGTCAGGATTTATTGGAATTACGTAC	A. mellifera CDS
CGTGTCCCCCCGTACTTCGTTCGTTCTTCGA	A. mellifera CDS
CTCGTACGAGATCTCGCGTAAGTGGTGGGGC	A. mellifera CDS
AACATTTTGAAAAAAAAGATATTTCAACAAT	A. mellifera CDS
ACAAGAAAGAGAAGAGAGTACGATGCGGTGG	A. mellifera CDS
AGCTTTGCGAAATGCAAAGGGATATCAGCGG	A. mellifera CDS
TGATGGAACAATAATTATTTTTCGTTCTAAC	A. mellifera CDS
AAATTGAGAAAAAAATGGTTAGCAACATTTC	A. mellifera CDS
AAAATTTTTATATTATTTTAATCTCGAAATC	A. mellifera CDS
TAGCCGATCAATGCCACCACCATGATATTTC	A. mellifera CDS
AAATATTTATATTAATTACAATTAATAATAT	A. mellifera CDS
AACTGTGTACGGAAAGAATAAAGGCGAGGTA	A. mellifera CDS
TGAAAGAGTTAAAATGTACTCAAACAGAAGC	A. mellifera CDS
TACCCTCGGTGGCAAAGCTGATATTTGCGAA	A. mellifera CDS
ACGTACGGTTAAGATGGTTTTAAACGAGTCG	A. mellifera CDS
AGATATTTCTACAGATGAAGCATTAAAACCC	A. mellifera CDS
AGCACAATATATATCGCGAGCAGGACAAGAG	A. mellifera CDS
AAACTGATGATGAAGAAATGATACCAGATTC	A. mellifera CDS
CACCCTGTCCTCCACCACCCTGTCCTCCACC	A. mellifera CDS
TCCTGATGAGGCGGTGAAAGATTTGTCCGAA	A. mellifera CDS
TATTTAATAAACTAACTGAGAATGTCTATCA	A. mellifera CDS
CCGACCATCTCTCGAAAGAGAAGCGACGAAG	A. mellifera CDS
CTTTATTGAGAAATCTCAAAAAGAACAAGAA	A. mellifera CDS
CCCTTGCGAATACCCCTAATGTGGGTATCTC	A. mellifera CDS
ACCACAACATCTATACCAGAAATTACAATAG	A. mellifera CDS
AAAAAATAGTCTTAAATTAATGGAATTAAGT	A. mellifera CDS
ACAGATATGGTTAGTTATTACACGTTACCGA	A. mellifera CDS
AACGAAGACAATAAAGTGAAACGGTACAACG	A. mellifera CDS
TAAACAAAGATGCTGAACATGAACCAAGAAA	A. mellifera CDS
ATTGCACAATTTTATTTTCTTTTGAATACAT	A. mellifera CDS
AATCCTATCCCTCTTTTGCGGTACAGTCAAT	A. mellifera CDS
TTAATTAGCGAACATTGAAATCATTGAAATC	A. mellifera CDS
AACACGGTTTATCCATATACTCGAATTGGAA	A. mellifera CDS
CCTGTTTTTTCATCCATCGAAAAAAATTACA	A. mellifera CDS
TAATTAAACATCTTCTAACCATAACCATTCC	A. mellifera CDS
ACATGGTTGGTCCTGGAGAAGTGGATGATGA	A. mellifera CDS
CTTACAAATTATGCTTCTGCATATTGTACAG	A. mellifera CDS
GCCTTGTGCAGCCTCATGTAATCAGCAAGAC	A. mellifera CDS
CTCTCTCTCTCTCTCTCTCTCTCTCTTCCGC	A. mellifera CDS
AATAAATTGTCACTTAATTAATCAGCCAACA	A. mellifera CDS
AAGAATTGTGGTTCAACACGAACAGGTTACA	A. mellifera CDS
AAGTGCAGCAAAATGGAAATAGTTCTTTCAT	A. mellifera CDS
TAAAGTGGATAATCTTAGTGAAATATTGATA	A. mellifera CDS
TTAATTTTTCGCATTTATCATAAAATATAAA	A. mellifera CDS
ATTAATTTATTTGCACAACGAAAACTATACG	A. mellifera CDS
AAATGGGAGTCAAACGATCGTTTGAACTTCG	A. mellifera CDS
AATTATTTATGACACCATGGCAAATTATACA	A. mellifera CDS
AATGTCATCTTTTACCATGACATTGGCTAGA	A. mellifera CDS
TTCGTCTCGAAGAAAAGCAACTACTTTTTAC	A. mellifera CDS
AATCTGAAAACTGCCAAATAGAAATACTAAG	A. mellifera CDS
ATGATGCTGTTAGTGGATTAGGAACTGATGA	A. mellifera CDS
ATAATAAGAAAAGGTGAAAGGTGAATTTATC	A. mellifera CDS
TAATAAGATTGATAGTGGTGATGGATTTGTA	A. mellifera CDS
ATGCTGATATACATCGTCGAGGCAGACGTCA	A. mellifera CDS
ACAAACATTATTTATTGAGCAACAATTTGAA	A. mellifera CDS
AAAGTGTATTGATTCATATGCTGTTCAGTAA	A. mellifera CDS
ATGGGGTCAGTGGCGAGTTCAAAGCCGGTGA	A. mellifera CDS
ACGAAATAAGTAGGACGAATTTTATCGAATC	A. mellifera CDS
TTACGAAGAAAATTAACAGAAGTTTCATAAA	A. mellifera CDS
AAAATTCTGTTAAAAACAGAATTCTTTTTAT	A. mellifera CDS
AGATATAGCCCCACAAAAGATACAAAAGTTA	A. mellifera CDS
TATTTCGATATTTTTCGCAGACAGATGTAAA	A. mellifera CDS
TATTTTGCTACTAATCCAAAGACCAGTTGGA	A. mellifera CDS
TCCGCACGTTGCTTCGCTGATGGATTTTCGA	A. mellifera CDS
TCACTGGATACGATCGAAAAGAACCTTATAA	A. mellifera CDS
ATAGAAGCCAAAAAACAAGCTATTAATGATG	A. mellifera CDS
TTTGTGCACACGACTGCCTCCAAAACGTGCA	A. mellifera CDS
TGTCCACCGTGTCCACCGTGTCCACCATGTC	A. mellifera CDS
ATGTGACACTCTCAAGCGTAAATGTTATTCC	A. mellifera CDS
CAACAACTTGCAACCGAGGTTTGGACATTTC	A. mellifera CDS
TGGTTGGGTGAGAGAATATACAAAGTTTCAC	A. mellifera CDS
AACACGGCAATTTGAGCAGAGAAGAGCGTCG	A. mellifera CDS
TAACTGAATTAGGACAAATGTTAGCTTTTCA	A. mellifera CDS
AAATACCTCATTGGTTATATGTATACAGTAG	A. mellifera CDS
CGCAGGCCTGTTTCCAATGGTAAAGCCGCGA	A. mellifera CDS
ATATAAATAGTTTACGTCAGAAATTCAAAAA	A. mellifera CDS
CTTTTAAAACCAGAGACTTTAAGGGAAAAGA	A. mellifera CDS
TATGTATTGCAACTCCTGGTAGATTGATCGA	A. mellifera CDS
TTTGTTCATTCCTTTAATCGAAAAGTGTACA	A. mellifera CDS
TTACAATTATTACAACGAAATGTGCAAAGAA	A. mellifera CDS
TAGTACAAAAGATATACAATTACAGACAAAA	A. mellifera CDS
AATGTTACTAGTTCTCATTCTCAGCGCTAAA	A. mellifera CDS
AACAAGAAGCATTTATTTCTGGTCATGGTGG	A. mellifera CDS
AATAGACATCTAGAAGAAAAAGAATAATGTA	A. mellifera CDS
CAACGGATGGATCGATTCTGCTATCGGGATC	A. mellifera CDS
ATCATTCCATCCGTTTCGCGACCCGATTCCA	A. mellifera CDS
TTTCGTCGTAGCGCTGGCGTATCAGGGACCA	A. mellifera CDS
ATATCAGAGAAGTTCAATTGAAACCCACCAC	A. mellifera CDS
TGTGTCTATTTTCAAAAATATAAATGGATTC	A. mellifera CDS
CAAACCAATTGCCCCGCCACCTGTTTGTGCC	A. mellifera CDS
CTTATGATACTTCTGCCCAAGATAAACAGAA	A. mellifera CDS
ATGAAAGTAATTCTGATTCAGATAGTGATTA	A. mellifera CDS
AGTCGTATTGAAGATACGTGGATCGAGTGTC	A. mellifera CDS
TAAACGGAAAAATACAGGTATAACTCAAATA	A. mellifera CDS
TGGCTTGAAAATTGGAAACCTAACACTTAAC	A. mellifera CDS
TTTCCTGCCTGCTTCTCTCTACCGCCCGCCC	A. mellifera CDS
AGATGAAGAGTGCACGGAGGCAACAGCGGGA	A. mellifera CDS
TATATATGTATATTACTTAAATTGTGTGGAA	A. mellifera CDS
ACAATGTACCACCTGAAGCCTTTTTATAATA	A. mellifera CDS
ATTTCCAATTGTTACTAATGTTACAATCTTC	A. mellifera CDS
ATTAATAAGTAAGTTTTTAATAATTTTTGTC	A. mellifera CDS
AATTGATGCAGCGATTAAAATATTGGATATA	A. mellifera CDS
CCCCTCGATCCGTACCCTCTCGACCGCTTAC	A. mellifera CDS
ACTAAACGTCGGAAGCTCAATTCTCCGAATC	A. mellifera CDS
AAGTGACAAGACTGGCACATTGACACAGAAT	A. mellifera CDS
CAAGCTTATACACTTATATACTTTCTCAAAA	A. mellifera CDS
CTGGTCCAGTGAACATCACGATCCTCTTTCC	A. mellifera CDS
AGATGCATAAACCCCAACACGAAAAGCACAA	A. mellifera CDS
TCGGTGGAGGTTCAACACAAGTGACTTTTTC	A. mellifera CDS
AAAATGTTGTATAACGAAAAAACTGAAGATA	A. mellifera CDS
CAACGTAAGAAAGAACAAGAACAAGCTGCAG	A. mellifera CDS
TACCATGTAATTGGATTATAAGTCCACTAAC	A. mellifera CDS
AATGTAATTAATTTTAATTTTCCTGCAAAGT	A. mellifera CDS
AACAATATATTTGGTGATAGTAATGAATCGG	A. mellifera CDS
AGGGAAAATTTCTGCTATGAACTCAAAAGGA	A. mellifera CDS
AGTTTTGCTATGACCGTCGTCTGGTCACGAG	A. mellifera CDS
AATATATTAAAATGGGACGAAAAGCAAAATT	A. mellifera CDS
CGAGCCGAAAGTTGGTTTTCTCAGGACTATA	A. mellifera CDS
ACCAGTGAGTGCCTCAGTGTAGAGATACGAG	A. mellifera CDS
AAACAATTTCTCGTACATATTTGAGACTGCG	A. mellifera CDS
CTTACTGCAGATGAAGTTTTACAATGCAAAC	A. mellifera CDS
AATTATTCGTTTGTGGATATTCATTATGAAT	A. mellifera CDS
AAAATAATGATGATAAAGCAAAAGCTGGACC	A. mellifera CDS
ATCCCTGGCATCATCTCGTTCCTACGCCACG	A. mellifera CDS
AAAGAAAATCCAATATCAATAAAGGATAGTA	A. mellifera CDS
AATGGGCACTGACGTAATCATCACATTTATG	A. mellifera CDS
AACGAAGTATTTCTGAATTTAATGCAAAAAT	A. mellifera CDS
ATAAATTTATATTATTTATCTTTGACTGATA	A. mellifera CDS
CCTCGTAATATAAAATTTCGCGACATTTGAA	A. mellifera CDS
ATTTTTATTTATATTTATAGTTCTTAATGAC	A. mellifera CDS
AAAAAGAATGAATCAGAATGTTCAGAAGATA	A. mellifera CDS
TACCAAAAAGTATTCATAAAAAACAAGTAAA	A. mellifera CDS
ATATGAAAGATTTATAATCCGTCCAACAAAT	A. mellifera CDS
AAAATTCCAAAGGAACAGAAAATTCCTATAA	A. mellifera CDS
AGACGGTCTCTCCCGCGGACCGATTCCGAAA	A. mellifera CDS
ATATTTTCCATTGAATAATAGTTGTCATGAA	A. mellifera CDS
CATCAAATATGTTTTTAAGATATACATTTGA	A. mellifera CDS
CACGATGAATCGGCGCTCGATCAACTATACG	A. mellifera CDS
AAGAGAGGACATCGAAAAATGGAATTGATCG	A. mellifera CDS
ACTTGGTCATAGATCAGCTATTGTTAAACAA	A. mellifera CDS
CCGGAGCTTACACCAGTTGTTGTTTACTCTA	A. mellifera CDS
GAAATTGAAGAAGTTTAGTTTAACTAGGAGC	A. mellifera CDS
AAAAATTTTTAAAAATTCAGATAGAAAAGTT	A. mellifera CDS
ATCTGAAAATATCAATAGAAGAAAATTATAA	A. mellifera CDS
TACATGTGGTAGACACAAAAAATTCACTTTC	A. mellifera CDS
AAACTTTTAGAAGATTCATGGCGTTCAAAGT	A. mellifera CDS
ACATTAAAAGTTAAATAATTGAAAGATAAAA	A. mellifera CDS
ATGGTTCACAGCGAGAAGTTATTGTTACAAC	A. mellifera CDS
ACGACCTGAAGTTTAATAAAGAAATGTTACA	A. mellifera CDS
AATACGACAAAAATATATTTTCGAATGCCAA	A. mellifera CDS
CAGGATTTGGTCGTAAAGGTCATGCTGTAGG	A. mellifera CDS
AAATAAATTATCTCTCGTTAATGATACATGA	A. mellifera CDS
CAGAGAGAATCGTACAACGAGACGAAACGAG	A. mellifera CDS
TTCGTTAAATGTACGAACGTCTGGCCCATTC	A. mellifera CDS
GATCCAGCTATCAAAGTATCCGCAAGCGATC	A. mellifera CDS
GAATTAAAGTCAACTAGACAATTAGCTAGTC	A. mellifera CDS
TCGTGTCAAGCGAGCTGCCTCCGAGGCGGAC	A. mellifera CDS
AAAAAACGAGCAACCGTCAATTGTTTCCCTT	A. mellifera CDS
ACCAAGTTTCTTGGACAATACACGATGACTG	A. mellifera CDS
ATTTGAGAATTATTCAAAATGTGATTCAGAA	A. mellifera CDS
TCCGTGGACCGAGTTTGACACGTATTCGCGC	A. mellifera CDS
ATTCAACAGTGAGAGATTTGAATTTGAAGAA	A. mellifera CDS
ATAAACTCGTGTAACATGTTAAATTGTTATA	A. mellifera CDS
CCAGTATTTATGGCTGGTATACCTGGAGTGA	A. mellifera CDS
TTAGAAAAGGCAGATGTCATACGTGACAAAA	A. mellifera CDS
CTGAACAGCATCGCGAACGACCAAGGTCATA	A. mellifera CDS
AAAATCCAAACATAAATAAACAGGCAATTTC	A. mellifera CDS
ATACGATTATTAGTGCGTGACTGTGCTCGTA	A. mellifera CDS
TATATATAAAATCGATCGTGACACCGAGCTC	A. mellifera CDS
ATGGCGCGGGGGAGATGGTGACACGGCACGG	A. mellifera CDS
AAGAAGATAGAAGAAAGTTAAGATTCTTAAA	A. mellifera CDS
CCGGTGGAATAGTTAAACACCTCGTTTTGCG	A. mellifera CDS
CATACAATTACATAACTATGCAGAAGAAGTA	A. mellifera CDS
ATTACTATTTTGTGGCACAAGATTGCGCTTG	A. mellifera CDS
AAATATAAAAAAGAATATTTCTATGATAAAG	A. mellifera CDS
CAAAACTCATTTTCCTTTTCCCTTGCTTCCG	A. mellifera CDS
ATTTCAAAAGTTCGAGTGAGTGCGCGCAAAA	A. mellifera CDS
GCAAACCGATATGTGTTGCCGAAGTCCTGCC	A. mellifera CDS
TAAATATAAGATTAAAATTAGATTCTTATTA	A. mellifera CDS
AGACAAATTCTTTTCATATAACTTCGATCTA	A. mellifera CDS
TTTTACAAAGAGATACTGAACGAAATGGCCC	A. mellifera CDS
TTGATAAGTTCTGATAAAAGTTAATAAAAGC	A. mellifera CDS
CTATGTTGATACAACCTGGTCAAGAATTTGA	A. mellifera CDS
CGTGTCCATCAACGTCGACGAGCAGGCGGCA	A. mellifera CDS
GATGCAACTCTTGTACATATTGTTAGAATAC	A. mellifera CDS
TTTATCAGAGTTGAATAATTATGTCCCTACA	A. mellifera CDS
TTTATTATAACGGGTATGTAAATGTAAGAAA	A. mellifera CDS
AATTGCAAGTAGCCACAGCAGCTTTGAACGC	A. mellifera CDS
ATACCTCAATTAATTTATTATGAATACAAAA	A. mellifera CDS
ATAATAGAAAATTCTCAGCACTTTAAAGAGC	A. mellifera CDS
CAGTGCATCGTTTACGACGGGAACCGGAGCG	A. mellifera CDS
AACATATATCAATTATATATAAACATATATT	A. mellifera CDS
AAAACGTCGTAAAGAGAGGTTGGAAAAGAAA	A. mellifera CDS
AGTTGGCGGTTAGTAAAGTTGAAATATGTAC	A. mellifera CDS
ACTTTCATAATCATGGAAATAATAAAAAAAA	A. mellifera CDS
ATATCTCTTATATTTAGATTATTATTACTTG	A. mellifera CDS
CATGTTGATGAGATGTTTTCGCGTCGATCGA	A. mellifera CDS
TATTATGCATATCCACATCATACTAGACCTC	A. mellifera CDS
GAAAGGGACGGAAGTCGGTGGATCAAGTGCC	A. mellifera CDS
ATCTCGGCGGACAAACGTTGTAAATAGCTAC	A. mellifera CDS
AGGATCGAGGCGAGATCCATCGTCGAGAAAC	A. mellifera CDS
GAAATGACTGGCAGGAAAGGACGAGTTGTTC	A. mellifera CDS
AAGAAAGAGGTGAGGATACAGGAGAACGTGG	A. mellifera CDS
ACGTCCCACCCTTTGAACCGCGCCGGACCCC	A. mellifera CDS
AGGCGAGCAGAGGAAACGGCCATTCTCGAGC	A. mellifera CDS
TTCAAAAAAATAATAACAGTGAAAAATGCTC	A. mellifera CDS
TTCAACTAACGATCATTCGTTCTGGTGAGCC	A. mellifera CDS
CAAAGACTTAAAATTATGGAATATTATGAGA	A. mellifera CDS
TGATAGAGGTTTCCGCGTTACACACAGGAAC	A. mellifera CDS
AGTCGGCTGTAAAGCCGATTATCACGAAACA	A. mellifera CDS
CAAACAGCGTTTGATATGACATCTTGCATTA	A. mellifera CDS
ACAAATTAAGAGAAGAATTGGAGCTTTACAA	A. mellifera CDS
ATTTCGAATTATTTTATATTAAATTCTCTCG	A. mellifera CDS
ACTGAAAACATTAAGGAGGGCATACCTTTAC	A. mellifera CDS
ATATATTTGAACCACCCTTACCAAATTATAA	A. mellifera CDS
CAACGTATCATATCGTCCCGATTCGAAGCTG	A. mellifera CDS
TGTCGTTCGTCACTTTTGTTTTTTCTTTTCC	A. mellifera CDS
ACATATTAAAACTTCCGTTTTGGTAGGAGAA	A. mellifera CDS
AATGTATGAATCTCTGCAATAAAAAGTATGA	A. mellifera CDS
ATGTCGAGCGTATATTTAAATCTATCAAAAG	A. mellifera CDS
CCTGGTAAGACTACAATGGATATTCTCAATA	A. mellifera CDS
ACCTCGAACAACAGCACAATTAACATGTTCT	A. mellifera CDS
CAGTTAAAAGTGTAACAATCCGGTGTAACTA	A. mellifera CDS
ATAATTAATGATAAGTTTTTAAAAAAATTAG	A. mellifera CDS
ATTATTATCATCATCGTTCGAAAAGTCGTGG	A. mellifera CDS
TCATGTTGCGGCCAATGAATTGTGAGTTAAA	A. mellifera CDS
AAAAAGAATCTATAAAGGAAGAGGAAATAGT	A. mellifera CDS
AATATCAAGATAATATGACAGATCGACGCTA	A. mellifera CDS
TATACAGATTGTTTTAATATCAAGAAAATCA	A. mellifera CDS
AAAGAAAAGATAACGAAGGTTATTCTATATT	A. mellifera CDS
ATGGATAGAGGATAGAGAAGGAGGAGGAGGA	A. mellifera CDS
AATTGCGGGAAAATACGCTCGCGCTCTGCCA	A. mellifera CDS
ACCCACGACCCCACCCAATCTCGAGGGCGAT	A. mellifera CDS
AATATCAAAATTTTAAAAGCTCTATTACACT	A. mellifera CDS
AAGTTCAGATTCAGAAGATTTAGATATGAAT	A. mellifera CDS
AGACGACCAATTTGAACAATTGCAGCTACTA	A. mellifera CDS
AAGATGAACCAATGGATGCGTTAAACATAGA	A. mellifera CDS
CGCGTGCGAAAGAAAAATATACTAATATTTA	A. mellifera CDS
AAATAACTAAACGCGTGGATCTTTTAATGGA	A. mellifera CDS
CAACCTACATTTCCTCCCGTGTCCAACGCTC	A. mellifera CDS
CCTCGGTAGCATTGTTAATTAATCCCATCTA	A. mellifera CDS
ACTGTTGATAGCAGGCCTATCTTACTATCGA	A. mellifera CDS
CCAAGTAGCACATTCGCAAGTTGGCGCAGTA	A. mellifera CDS
TCCGCCGCTCGCCGCTGCCGATCTCTACGGA	A. mellifera CDS
CCACGTTTTCAAGGTAGCGCCACTCTGAATA	A. mellifera CDS
TTTGCATGAAATGTCAGACGACGTGGCTATC	A. mellifera CDS
AAATTGTGCATGAAGTAGATGGTCTTGAAAT	A. mellifera CDS
AATGGGAGAATCATTCGGAAGTTGAATTAGT	A. mellifera CDS
ACATCTATTTTTAAGCATCGAAGTTTAACTG	A. mellifera CDS
GCTGCAAAACTTTTTCAAAAAGCTGGTTTAC	A. mellifera CDS
CAACAAGACGCTCAAATCAGTGACCGATCAA	A. mellifera CDS
TGTTAATGTTAATGAAGTACTCTATCCCATC	A. mellifera CDS
ATTCCCACGATCCACCAACGAGTTCCATAGA	A. mellifera CDS
GCCTCGACGTGTGTCCAGCATGTCGTTGTAC	A. mellifera CDS
CTTGTGGAATATTAGCACCTAATCATTGTTC	A. mellifera CDS
ATTTAATAAATACATAAATAATTGTATAAAA	A. mellifera CDS
AAATTTTGTTAAGGTTCGTGTTCTTCTTCCC	A. mellifera CDS
TATTTTACTTACCAAAAAATAGGTTATTTTC	A. mellifera CDS
CAGAGTGCTTTTGCAGCTTCCCTTTCCTCGA	A. mellifera CDS
ATTTCTTCGAATCTTCCTGAAAACTCACAAT	A. mellifera CDS
AAATAAATATTTTAGAAAGACTATATAAATA	A. mellifera CDS
ACGAAGTGACGAAAGTCGAGGAAGAAAACGC	A. mellifera CDS
TATTTAGGTCATGTAGGAGATTCTGCCATAA	A. mellifera CDS
TGAAGAAAGCATTAACAATGAAGTGTTAACA	A. mellifera CDS
ATGTTTACAAACATTTAGCATTGAACAAACA	A. mellifera CDS
ACGGCCATAACCATTTGCAAAGTAAACGAAG	A. mellifera CDS
CCGATACACTCGTTCAAGGGAGAACGTTCGA	A. mellifera CDS
AAATTGTAGATATATTCGAAAAATATGGCAC	A. mellifera CDS
ATATCGTTTCATCCATTAATAACAAGATGAT	A. mellifera CDS
ACACGAGGAGCATCATTCTCATCATTCCCAT	A. mellifera CDS
CGAAATTAATCGATAATTAATTTCTAGAAAA	A. mellifera CDS
CACATCGCGGCGATAACACCGGTTAATCGTG	A. mellifera CDS
AATCGTGGAGCGACGAGAGTCTGAACAACGC	A. mellifera CDS
TAACTAAGGTTACAAATTGTAAAGTCGGAGA	A. mellifera CDS
TACAACATATGCTATTTTCTATCTCAAATGC	A. mellifera CDS
ATGCATACATACGAAAGAGGAGAAGAAGACG	A. mellifera CDS
CGAACGAAATCCACATGATTTTTCTTCAGAC	A. mellifera CDS
CATTCGTACCTCTTCCGCCACCGCAATCTCA	A. mellifera CDS
AGTGTCGATTTTTCTGTTCAATAACGGCTAC	A. mellifera CDS
TTGACGTTCATCCTGCCCGACGAGAGATACC	A. mellifera CDS
ATTACTTGCGTTACCTCTTTTCCTCCGTAAA	A. mellifera CDS
ACGTCGCGACAACGCTCTTCGCGGGTGTTCA	A. mellifera CDS
ATCAAGCTGACACTCGGCGTTGAGTGTTAAT	A. mellifera CDS
AGATCGATGGGATGCGTTCGAAGCACTGAAC	A. mellifera CDS
AAGGAGAGGATGGAAACATCGATCCATTTGG	A. mellifera CDS
AATTCTTCGTGAACTTAAATCACAGGAGACA	A. mellifera CDS
AAGAAGTAAGATGGTTAGGTTTAAGTGCTAA	A. mellifera CDS
AGAAGTTTGTGATTTGTTACATGCAGCACCT	A. mellifera CDS
AGGGGATGAAAGCTTATTAATAGGGGGTTTC	A. mellifera CDS
ACATCCTAATACATTATTTGGAGAACCTGCT	A. mellifera CDS
AAATGGAAAATTTAATAAAAGAAACAGAAGA	A. mellifera CDS
TTAGTTGTACAGAAGGAACGTGAAAAAGAAC	A. mellifera CDS
TTTCATGCTTGCAATTGCAAAAATGTAACAA	A. mellifera CDS
TTTTCAAAAAACGAAGAACCACCAAAGAAAA	A. mellifera CDS
ATCCGTGCTCGTATTGACCAGGTTTGCGAGA	A. mellifera CDS
TCTTTTTTTATAAGCAATGTTGTTCGTTTAA	A. mellifera CDS
AAAGATATAAATTAAGAAATGAAATATTAAC	A. mellifera CDS
AAGAAAATGAATCGAAGATATGAAAAAGTTC	A. mellifera CDS
ATAATTACAAAAGAGAGAAAGAGAGATACAC	A. mellifera CDS
ATTATTTATTTATTTATTCTTTTTGTATTAG	A. mellifera CDS
AATGCTGTGTTGTCTGCTACTTCTTCGTTTC	A. mellifera CDS
ACGTTTTATTTTGAGAGTACCGAAAGATTTA	A. mellifera CDS
AAATAATAGTCAAATTGCAAGTTCTATATAT	A. mellifera CDS
ATGTAGGATTTGTAATCGTTTGATACTATAG	A. mellifera CDS
TACCGCCGCTCCGTAAACCAGATAGCCGGCA	A. mellifera CDS
CACACAACTCCTGTTTTATTAGCTTACGGTG	A. mellifera CDS
AGAACTGCAAGTTTTTCCCAGAAGGCTAGAG	A. mellifera CDS
AAAAACATGCTTAAGAATAATATTACTTATA	A. mellifera CDS
CCCCTGGAATCTATAAAATTCGTTCGCACGA	A. mellifera CDS
AAACTTGAAAATTCCAAGTGTAACGAATATT	A. mellifera CDS
CGAATCGAATCCAAAGCTTCTTGGAAACGCG	A. mellifera CDS
ACAAGGAAACGATCGCTCGAATAAATCACAA	A. mellifera CDS
TCCATATTACGACCATTATATAGTGCAAAAA	A. mellifera CDS
ACTTCCTTCGAATTGGGCATCACGTAAAAGA	A. mellifera CDS
CTCGTACAGAAGACACGTTCATTGAATCGTC	A. mellifera CDS
AAACCAGGATACCTCGGTGGATACGGTGGAT	A. mellifera CDS
ATATTTTATTCAATTTGGAAATCTTTTAAAA	A. mellifera CDS
AGTTTCGTGTCCAGCGTTATCTTTCGTACAG	A. mellifera CDS
TTCGAGTCAAGTGGTGCTGATTAGCTTTCAA	A. mellifera CDS
TACCTCTCTTTGTCAGCACTGCGTCGCCGTC	A. mellifera CDS
AGAATTCAAAATGTAATTTTAGATAATGAAG	A. mellifera CDS
ATTCGATATCAAACGATATCTGATTACACAA	A. mellifera CDS
AGAGGAATAAATCGTTGACGATTAGTGTTAA	A. mellifera CDS
ATCTTTTTTAGTGAACTTTATATTATATATA	A. mellifera CDS
CTGATCGATTTTGCAAATTAGATCAAAGGGA	A. mellifera CDS
ACTGAAGGATCGGACAGAGGGCGCTCGTGCT	A. mellifera CDS
ACGTTAACCTACATTTATGGGATGTCGGTGG	A. mellifera CDS
ACATATATTGTTATTATTTTAAAATAATATC	A. mellifera CDS
TTCGGCCAATTGATGCTGGAGGAGCATCCAA	A. mellifera CDS
ATTATATAATAACGTGCCTTATGCATTGAAT	A. mellifera CDS
AAGACAGAGTATAATCCTTCCCATCAAGCCT	A. mellifera CDS
AGTTGCTCGTTAACGTTGCAGGTAACGTGAA	A. mellifera CDS
AGATGGTGGCCGTGCAGGATCCCAAGGGGCC	A. mellifera CDS
AGTATTGTACCAGATGTTGATACATTAATTG	A. mellifera CDS
TTTTAGTATATGATATTTCTTGTCAACCTAC	A. mellifera CDS
CCTATTTTAGAAATTGTGAAAACACTTACTA	A. mellifera CDS
AATTTTATCCAAAATTTTTGAAAAATCGATG	A. mellifera CDS
TAAAGATGATAATATGATTGTTCAAGGATTA	A. mellifera CDS
CTATCGGATTACTCGGTGGTGATCCTCGACG	A. mellifera CDS
ACGTAATGCGTTGCATGTTGATGAAGAACAG	A. mellifera CDS
AAATAACGACGACACTTACCACGGAGAAAGA	A. mellifera CDS
AGAATTACATAAAAGTAGATTTGGATCTGGA	A. mellifera CDS
ATTCGATTTAGAACAATGGAATATCTATCTA	A. mellifera CDS
ATCAGCTCCCACGATGAAGGCGAGTTCTTGG	A. mellifera CDS
ATTTTCTCGATTGTCAATGAAGTTCGCGGTC	A. mellifera CDS
TCTCTATTCGAAATCTAACCTAATTTAAACA	A. mellifera CDS
AAGAGAAAGAGAAACGCCGGGAGTCGTGGAG	A. mellifera CDS
CCACTTTTTCAAAAAAACTCAATTATTTACA	A. mellifera CDS
ATCTTTGATAATGAGCATTCTCGACGCTATC	A. mellifera CDS
AAAATCGATATTATCTTTTAAAATTTCATTA	A. mellifera CDS
TAAAAATATACCAATGTATAGAAAATTTGCC	A. mellifera CDS
AGTTAAGTACGGTTCGTTGGTCGAAACAAAC	A. mellifera CDS
ATCTCCTAGGACAAATTTTCGTAATTGAAAG	A. mellifera CDS
ATTGGACAAAGAATTGAATTACGATAATCAC	A. mellifera CDS
ACAAAAGAAAATAAAAGAAAACAAAGTGATG	A. mellifera CDS
GAATTTAATAAAGTACCGATCAAAGATTATC	A. mellifera CDS
CCTGGATGGAACAGTCGTGATTCAAGTGTAG	A. mellifera CDS
TTCAGGTCGAGACAAACTTCGAAAGGGAAAA	A. mellifera CDS
GACAACGATGCGCCCCGTTGCATGGCGTGTC	A. mellifera CDS
CTCACTATCCTGTAGATATATGTATAGTAGA	A. mellifera CDS
TACAGATATGAGTATGAGTCAAGTTATTCAA	A. mellifera CDS
TACGGAAAAAAGAAAGAAAGAAAAAAAGGAA	A. mellifera CDS
ATAAAATTAACACGCATATTCAAAGTTGTAA	A. mellifera CDS
AACATGACATTGCAGATGATATTATTATGAA	A. mellifera CDS
CAATCGATCGTCGGCGTCGATTTGAGGAATC	A. mellifera CDS
ATTTTCTGCCTCGTCTCGTATCGAAAGATTC	A. mellifera CDS
ATTCCCCGTCAGGGTAAATCATGCTCACCCA	A. mellifera CDS
ATTTTTTAAACGGTTCAAACATAACCTTACA	A. mellifera CDS
AAACGAATTTATTCATACTGTTTTCTTTTTC	A. mellifera CDS
CAGCCCCGGTAGATCAGGGAATATTATCCAG	A. mellifera CDS
AATCCTTTTATGTGGTTCACTTGTATTAAAT	A. mellifera CDS
AGTTGCACAATAACTATCCCACTGTAGATCA	A. mellifera CDS
AAATAAAAAAATTGAAGTTCTTATCGAGCGA	A. mellifera CDS
TTTATGCATGAAGAATCTCCAGAAGGTGGTC	A. mellifera CDS
ATTTTTTTTATAAACTTTTTCTTTTTGCTCT	A. mellifera CDS
TAATTATCGTATAAACTTATTTGAGATAAGA	A. mellifera CDS
TACTTATCGACATGCATATACGCAGCCGCGC	A. mellifera CDS
CGAGAGCAGTTTCAACGCGCAAAGTTGGCAA	A. mellifera CDS
ATCGATTCGCAAAATGTTGTTTATTTAATTC	A. mellifera CDS
AAGAGTATGCCTATAGCCCTGTACCAGCGAG	A. mellifera CDS
TGATCGTCTTGGTTGCTTTAGTTTAAGTACA	A. mellifera CDS
AAAATTTTTAACTAAATAATGGCCACGATTC	A. mellifera CDS
CTTCTCACTTACGGTGGCTATTGGAGGCCAA	A. mellifera CDS
ACTTATGAAACAAAATCTTGATTATCAAGTG	A. mellifera CDS
CATCCAGAAGAAACGTTATAAGCGAGATGAA	A. mellifera CDS
TCATACAAAATTTTTAATATCGTAATAAAAA	A. mellifera CDS
AAATACTGTATATTCGATTTTTTATATATAC	A. mellifera CDS
ACGTCTCTCGTTTCGTGAAAACGTATTCCGC	A. mellifera CDS
AATGTGGATTAGAATCACGGTGTGCGGTAGA	A. mellifera CDS
AGTGCTGTGTTTTTTGGATTGACCCTCGGTC	A. mellifera CDS
CTCCAAGGAAGGATCAAGGAAATGTAGAGAA	A. mellifera CDS
AAACTTATTCAAAGAAAAGAATTACAGATTT	A. mellifera CDS
TCGCTCGCTCGACCGTTCTCTTTCGTTTCCC	A. mellifera CDS
CAAAATTCCAAAAAACGTGAATGGGTCTCTC	A. mellifera CDS
AAACGGGATCATTTGTTGTAGTTTCAATTTA	A. mellifera CDS
AATATTTGGTTGGAAAGAAAGGAAAAAAAAA	A. mellifera CDS
AGATGTCTCAACGTCCCACCGCAACACCATG	A. mellifera CDS
TTCCGTTGAAATTCCGGATTTTATTTGGACA	A. mellifera CDS
CCCTGATGTAAAAGAGAAGCGCGCCAAAGTC	A. mellifera CDS
CAAACAAAAAGACTGCGATCACGTATGGCGG	A. mellifera CDS
TTACAAATAATAATTACATTATTATACAAAC	A. mellifera CDS
AAGCTTTAAATCATTCAAATGTTGATATACA	A. mellifera CDS
AAAAGATGTTGACAAAGGATGCATACATAAT	A. mellifera CDS
AAATATTTTAAATTAACAAATATTCAGGATT	A. mellifera CDS
ACCATAGATCCTTTCATAAAATTAACTATTA	A. mellifera CDS
TATATTCGAGGTAGTACAATTAAATATTTAC	A. mellifera CDS
TAGGATCCTATTAAGAGAATAGGTCTTATGA	A. mellifera CDS
ACAAAGTATGCTTAGGGCACCGTAATTGTTC	A. mellifera CDS
CAGAAAGCACACGGAGGATTACAATTACAAG	A. mellifera CDS
AAAGAAAGCTAGTGACCGCTAGTGTCAACAG	A. mellifera CDS
AAGAGAAAGAGCCGATTTTCACGGTTATCCC	A. mellifera CDS
TAAATAAGACATTAAATCAAAATGTTTAACA	A. mellifera CDS
AAACTGACCGGTATCGAGGAGAGCATACCGC	A. mellifera CDS
CAAAATTGTCATAGATCACCTTTACCATATC	A. mellifera CDS
CATCATTTACTGCAAGTATCAGAATTAGAAC	A. mellifera CDS
CCCGGTATTTTCGAGAAACGCGTATGAATTA	A. mellifera CDS
CGAGAACAGGGGTACATCACGATGTTAGATC	A. mellifera CDS
AAAATTGCATAAAACTCTGTTATTGAAAACG	A. mellifera CDS
CCTATGTATTCTTAGTATACATACTATGGGC	A. mellifera CDS
CAATTCGTCGGGCTGATCTTCGCCGGCTACA	A. mellifera CDS
AGAATTTTTTTAACTTCTTCAATTTTTAACG	A. mellifera CDS
AATTAGAACAAATGGAAAATATTTAGTAGAA	A. mellifera CDS
AAATGGAAATTAGAAAATCTTTTATCACTGT	A. mellifera CDS
TCAGTAAGAGTAAAGCAAAGAAATTAAAAGC	A. mellifera CDS
TAATGATGCTGCACGTTGCCCTCTCTGCTTA	A. mellifera CDS
AAACGAGTGCGGAATACTCGGCAACAGAGTG	A. mellifera CDS
AATAGAGATACAGATTCGTTGTTACTTTCAC	A. mellifera CDS
TAAAATTATTACAAGAAAAAATAAATAACAA	A. mellifera CDS
ATTTGATTAGCATTTCAGAAAATATGTCGCA	A. mellifera CDS
CAGCCACTCTTCACATTCCATTTCCAGAACC	A. mellifera CDS
ATTTCCACATTTGTTTAAAATGTGACCTTTA	A. mellifera CDS
CCTAGCCCGACTGTGTCTCGTACATTGTCCA	A. mellifera CDS
AGGTGGTGGTGGCTTGACCGACTTTTAAAGA	A. mellifera CDS
TCGCGTTTCAACCCGTCGCTCCAACGGGCTC	A. mellifera CDS
ATATTTCCGGATTGTAAATTAAAATTAATTA	A. mellifera CDS
TCGCGATCGTTCAGCGAAAAAAATTTCGACC	A. mellifera CDS
ACACACACGCCGCTATTGTGACAGGGTTGAA	A. mellifera CDS
TCGTTGTGTTTGGTGGCGTCTCTTTCAACGC	A. mellifera CDS
TCTTTTCTTTGTTATGCTTGCCAAATTGCAA	A. mellifera CDS
TACATATTATATCTTAATGAACTTGAGGCTC	A. mellifera CDS
ATGCCAACGATTTGGAGCCTGGCACTACTTA	A. mellifera CDS
AGTTGGTATTGATCTTGGCACTACTTATTCC	A. mellifera CDS
CAATTTATTCTAAGAGGTTATTAATGCCAAG	A. mellifera CDS
CGCGTAACAGAGAAAAAGAATCGGGGGAATA	A. mellifera CDS
TTTTATTCAATTTTCTCTTTTAAATCCTACC	A. mellifera CDS
ATGACAAGTAAAACCTATGATTCTGTTACAG	A. mellifera CDS
AAATCCACACGTCGCCATCTATAGAGAACAG	A. mellifera CDS
ATCAGCATATTTTGAGTGAAGCTGAGCTTCC	A. mellifera CDS
ACGCCGCTTCCCTCGACCGATCTAGATTGAG	A. mellifera CDS
TCGCTGCTTCGAGCAGCCGAGCTGAAAGTGC	A. mellifera CDS
ATCACAGTTAGCCGCGAACAGTTAAAGTAGC	A. mellifera CDS
TAAAAATATTGAACAGCAAAAAATGAATACA	A. mellifera CDS
TATATACACAGCCTCCACAATACTAATCCTC	A. mellifera CDS
TCGCTCGGATGGAGAGCAGAGGCATATCCGA	A. mellifera CDS
ACCTACCTTCGCCCTTACCGACTAGAAAGGG	A. mellifera CDS
TATATATATTTATTTATTTATTTATTTATAA	A. mellifera CDS
AAAAAAGGAACAAAACGAAAAGGCACTAAGA	A. mellifera CDS
TATGGAATAAGAAACATTTTATTATTAATGA	A. mellifera CDS
AACGATATTTTCGATAATTCGATAAATCGAT	A. mellifera CDS
AATCATCCTATTTTCACATTCACATCCTCGC	A. mellifera CDS
TGGCGGACGAATGGTTACCGTGACGGACACC	A. mellifera CDS
TGGCGGGCTGAGCGCTGCGGTTGGCAGCCTC	A. mellifera CDS
AAAGATGTATACTCTTATATAAATAAATTTA	A. mellifera CDS
TCCTCGCCATGAACGACATGAACATCGCCAA	A. mellifera CDS
AAAAGCAAAGATCAATTTCATTTTGAAATTG	A. mellifera CDS
ATGATAACATAAAACAATTAAAGAAAATTAA	A. mellifera CDS
CGTATCGAAGCTGAAATGGGAATTATCCGCC	A. mellifera CDS
TGCTTGTTTGATGCTGTGCTTGCATATGTGC	A. mellifera CDS
AGTAATGGTGAAGTAATTAGTAGTCCAAGAA	A. mellifera CDS
AAAATCTATCAACAAAAAAAAAAAGTTTTGT	A. mellifera CDS
AGGCGGGAGGAACGCGAAATTCGGCACGGGG	A. mellifera CDS
CGACAAGAGAATTGGAGCTCGGAGGTGTACG	A. mellifera CDS
ACGGATAATCCGGCATCCATCGATTCCTTTG	A. mellifera CDS
CATTAATGGCAACAGTGGCGAAGCTTAGCCA	A. mellifera CDS
AATATTAAATTCTGAACTTGCCGATACACTA	A. mellifera CDS
GACTGGTCAAGAAGAAATTGATACAGCTTGC	A. mellifera CDS
TGGAACCGGTAGCGACAATCCGGCAGTTGCC	A. mellifera CDS
ATTTACGCGTAGAGGTTAGAGACGATCCGGC	A. mellifera CDS
AATTTTCTCATTAATTCAAAGTTAAGTTTTC	A. mellifera CDS
ATTTAACGAGAGCAGGAACACGCATTTAACC	A. mellifera CDS
AATGATTCTGAGAATAAAGAACAGGATAAAC	A. mellifera CDS
CTTGACGATGCATGGATGTAATGGTTTCGCC	A. mellifera CDS
TTCAAAAGTTTCCACGATGGACGTCCAAACC	A. mellifera CDS
ATAAAATATCTATTATGAATTTTATGCATGA	A. mellifera CDS
AGCAAAGAGATACATATAATGCATTATTTTA	A. mellifera CDS
AACTGCATCGCATCTGCCCGTTTTCTGCTCT	A. mellifera CDS
TCTGTCATGGGATCTTCCCATAATAAGATAC	A. mellifera CDS
AATATTAAATGAACTTGGAGAAAAATATAAA	A. mellifera CDS
CGAACGTCGATGGAATTGGTCGACCTCCTCC	A. mellifera CDS
AAATCGTATCATACTTAAGAAACAAAGTTGA	A. mellifera CDS
CTCCGTATCATCCGTTTTTTCCAAATTCTTC	A. mellifera CDS
CAGAGAAGGGCAGTAGTTATAGTTCCATCAG	A. mellifera CDS
ATGAAATGTGCGAAAAGTGTTGTTACCAACT	A. mellifera CDS
AAAAATTAGAGGACTTTATTAATTTCTTTGA	A. mellifera CDS
AAAAACGATTCAAAATCTTATCTTGATCATG	A. mellifera CDS
CAAGACTCTATTTGTATCTCATTTTGTCTAA	A. mellifera CDS
ATATTATGATACAGATTGGACACTATGGGAT	A. mellifera CDS
TCGAGGGGTACGGCAGGATCGGAGGCGGCCA	A. mellifera CDS
ATTTGAAATCTATGAATCATGATTAAAACTG	A. mellifera CDS
AATATATTTTTTTTTTTGATATGCTAGTTGA	A. mellifera CDS
AACCTCGAGGATGACGCAACAAAACAAAACG	A. mellifera CDS
ACTCGGTGTTGCGCCACTCGGACCAGTACCT	A. mellifera CDS
TCATGTAGCAGTACCTACTCATTTCTATAAA	A. mellifera CDS
CGCACGCGGCCCTACGCATCCCCTTTGTACG	A. mellifera CDS
CTTTTTTTAATTCTTTCTTATATAAAAATTA	A. mellifera CDS
TCTGGTGTTTCTAAAGGTTATGGTTTTGTTC	A. mellifera CDS
TGAATCTCGATAATTTTAAATTCTTTCTTCA	A. mellifera CDS
ATTCTCACGAAGATTTCAATGGCGAGCAACG	A. mellifera CDS
CGCTCGTACTACAAGCGCGCCACTTTTTCTC	A. mellifera CDS
ATAGATATTTCACTCGCCGCTCGATTTTTCG	A. mellifera CDS
TTACAACTCAAATAAAAGATATATCAAAGAA	A. mellifera CDS
ATTAATTTTATTTTTCATGCTCTACCAGGGC	A. mellifera CDS
ATAATTGACAAAGATGATTAAGAATATTGGA	A. mellifera CDS
AGTTTTTGTGATATGTTTTTAACGAAAAGGA	A. mellifera CDS
ATCAGTGTCACGCTCACCGAGCCCAAGGAAA	A. mellifera CDS
AGCATTTTCATTAGAAATACATCCTTCTGTG	A. mellifera CDS
AGAAAATAGTACAGGCAATGTATTCATATGC	A. mellifera CDS
AAGGTATAGAAGATGATTTACATAAAATAAT	A. mellifera CDS
TCGCTCGAATCGCGTTTTCCCCGGTAAACAA	A. mellifera CDS
ACATGCGCAGATTGTGGAAAGAAATTTAGAC	A. mellifera CDS
TAATGAGTACAATCTAATCGATGAACATAAA	A. mellifera CDS
TCAAGTTGCGCGCGTTCTCTCCATTTGACAA	A. mellifera CDS
TCAAGTCAATTACCAAATAATCATAATAAAA	A. mellifera CDS
AGAAATAAATATGCTCCGGAACTTATGAGAC	A. mellifera CDS
ACGGTGTTGCCGTTTGCCAAATCGCGTCGCT	A. mellifera CDS
TAATTTATAAAAAGAAAAGAAAAAAAGTTTC	A. mellifera CDS
CGGTAAGCGAGAAATCGATAAGCAACGTCGA	A. mellifera CDS
CAAAATCTATCACTGCCTAGTCGATGAGAAA	A. mellifera CDS
ACGATTGTTTTTAGAAGTTGATACAACTCAT	A. mellifera CDS
ATCAACCAAACCTTGATGCACGACTGTTTTC	A. mellifera CDS
AGAATGTTATTAAGCCATAGTAAACTGGGAA	A. mellifera CDS
ATCAATTTTTAATTCGTGTAAACAAGAACAT	A. mellifera CDS
CCTAGTAACGAGTTTCATATTTTTCGCCCCG	A. mellifera CDS
ATAATATATAGATAGATAATATACGGATACA	A. mellifera CDS
AGAACAGCAAAAAAATATAGTTCATCTTCAG	A. mellifera CDS
AATACTTGATGTATCGTGTGAGAATGAGCGC	A. mellifera CDS
AAAACAAAGTACTGAAGATTTATTTAATGCT	A. mellifera CDS
ATACGGGGGCAACACATGGGCGTGGAACCGC	A. mellifera CDS
ATTACGTCAACGAGAACGATCAATGGCTCTC	A. mellifera CDS
ATACAGATGATATTGTACAAAAACAATTTTA	A. mellifera CDS
AACACAGATAATGAAGAAGATAATGATGATG	A. mellifera CDS
ATTTTAGGTTAAATCGTCTTACGAACAATCG	A. mellifera CDS
AACTGTTGTAGATAGAAGACAGTGTGTTTCG	A. mellifera CDS
ACAATAGCTACATTTGTAACTGCTGCTGGTC	A. mellifera CDS
TAGATTCTCTTACTGCCACATTACCAAAGAA	A. mellifera CDS
CCCATGAGTGTGCGACAAACTTGTTTTCACC	A. mellifera CDS
AAAGGATCACAAAGGTTATGGAATCTCTCGT	A. mellifera CDS
AAACAGTAAGTAAAAAGTAAGAAAAAGCGTG	A. mellifera CDS
AAAAAAAACGACGTCATTCTAAGGGAGAAAC	A. mellifera CDS
ACAATAGATCGAGGGGCTTATCTATACGGTC	A. mellifera CDS
ATTTCAATTCAACGAACTCTCAACATTCTTC	A. mellifera CDS
CGAGAAACAATGCCAACTGTCAAAAAACTTC	A. mellifera CDS
TTAGTTCTGCTTCTGTTATTTTCGGAGTGAA	A. mellifera CDS
ATCCAAACAAGAATTCATGGAGCTGGTACTA	A. mellifera CDS
CGAAGCAGTAGCCAATATCATGGGTATTAAA	A. mellifera CDS
AGGATTCCGATTGCCGGATCCACGAAGCCGA	A. mellifera CDS
CGGTACCTGACGCGCAATCGTCGCCTCGAGA	A. mellifera CDS
ATCCTACCGCTGGTTACGGTGACGCGGTCCT	A. mellifera CDS
AGTCAGCTTCCAACAAATCTAAGAAATGCAA	A. mellifera CDS
CTATATGCACAGGAAAGTCGTGGCAATAGAA	A. mellifera CDS
ATAAAAGATTTGACATCAAATTCTCCAAAAA	A. mellifera CDS
TATCAAACATCAACCGATGATATCAAAACGC	A. mellifera CDS
AATTGACCGATTCGAAGCACGCGGTCCTCGT	A. mellifera CDS
ATACGAATTTTTACATCGTGCTATTGTGAAT	A. mellifera CDS
CACACAACCATCCAAAGCGAATATTACGGTA	A. mellifera CDS
CCTATCAGCGAATTCGAGAGAGAGGTCACGA	A. mellifera CDS
TCAATAAATGTATGTACTGAATAAAAATATC	A. mellifera CDS
CGGAATGTTTTGATCAAAATATATCTAGATA	A. mellifera CDS
AATACTTTAAGTGAAGATGTGAAAATAGATA	A. mellifera CDS
TTGCTTTTGTAAAATTATTACAGAAATTACC	A. mellifera CDS
ATCAAGTTATGAAAAAAAAACGTACATTACA	A. mellifera CDS
ATTTGGTGTGAATACCTTTTTTGCATTATTA	A. mellifera CDS
AGATCATACTCCTGACTCAGAATCGAATCGC	A. mellifera CDS
ACTGTGCCTATGCTTACTGGAGACAAAAAGG	A. mellifera CDS
AATTTCATGTGATATAGAAAGAGTGGACATA	A. mellifera CDS
AACTGCAGAAGCCGGGACAGTCGGCCACGAC	A. mellifera CDS
AAGTTATTAAAAAAATATTTTTGTTCTAAAA	A. mellifera CDS
AAATTGCTAAAGCTAATGTATCCAATGCTAA	A. mellifera CDS
AGATAATCAGGAAGGCAGTTTGTCTGAACTA	A. mellifera CDS
ACTAAAGAAGATGAATTAAAAACAGATAAAA	A. mellifera CDS
TAGATTAATCATAAATCCTTATCTTAAAAAA	A. mellifera CDS
AATTTATAAATTTGAAATAAGCATTATCGTC	A. mellifera CDS
CGATTTCTATAAATATTTGACATAACACGTA	A. mellifera CDS
ACGAAATTAGACGATTCTAAAATTGAAATAA	A. mellifera CDS
CATTACGGATTATCCGCGGATGGCTGCAAAG	A. mellifera CDS
AGACCTGCTGAACAATATAATGCAGGGCATC	A. mellifera CDS
TTCAAAGATTCTTCAGAAAATAAAAACAAAA	A. mellifera CDS
AAACGAAGCGAGGCGAGGCGAGCCGAGACGA	A. mellifera CDS
TCAGGGGATCGACGACATTAAAATTCGTGGA	A. mellifera CDS
AATACGATAATGAAAGTGGATATAATTATTA	A. mellifera CDS
CCCCTACAACGTGCCTCTATAAAGTGAGAGC	A. mellifera CDS
AAATATTTAATACCCTGTCTACAAATATTAA	A. mellifera CDS
AAAGAAATTAATCATTGGAAGGCACAATATC	A. mellifera CDS
TTGTATTAGATTCTACAGATTTCCAATTACC	A. mellifera CDS
CAGTATCTTATTTCTGAATTGCAAAGCCAAC	A. mellifera CDS
ACGCGATCTATCATACTGTCCAATTTACAAA	A. mellifera CDS
ACGTTAAGGAAGAGAATATTGCGTTAGGCCT	A. mellifera CDS
AAGGCGACCAACTCGAGTCTAGTTTACAGGA	A. mellifera CDS
AACAAGGCGACGCGGAGTTTTCGTCGATAAT	A. mellifera CDS
AGTTAATAAAAATCCTATTCAAAACTTAACA	A. mellifera CDS
TAAGTTCCAACAGTTTTTAATTCGTTAGATA	A. mellifera CDS
CATAAATGCTGGAAAAAGTACATGGAATGAA	A. mellifera CDS
AGAATTGTTATAGAAATTTATTTTCTGTAAC	A. mellifera CDS
TACTTCCTTCGTCACGTAATTATAGGAGTTC	A. mellifera CDS
AATCGTCTGCGATAATAAATACATGCAAAGC	A. mellifera CDS
AATTTCGCAGAGAAAGGTGCCGATTGCACTA	A. mellifera CDS
AAGTTCTAGCTTTAGCATTGTATTTGGAAAA	A. mellifera CDS
ATCTTGGCCTTCTAGTATACATAAAGCTTTA	A. mellifera CDS
ATTTATGACGACATTTTGAGAGGTTGTATTA	A. mellifera CDS
AATAATTAAATATATGAAAAATGTTTTCATA	A. mellifera CDS
TTGCTGGATTTATTCTTGGTGCTGGTACAGC	A. mellifera CDS
GATCAACATTATTATGTACCAGAACAAAAAC	A. mellifera CDS
ATAGGCATCTCAATATTCCTGACAAAAATGG	A. mellifera CDS
ATGGACCAAGATTATGTTGAATATTATCCAC	A. mellifera CDS
CATTTTTCCATTTAAAAATATATTATATAAA	A. mellifera CDS
TACTCTACATAATGCAAATAAGGAGTAAGAA	A. mellifera CDS
ATATTATGATCTACGCCAATATATAGCTGTC	A. mellifera CDS
CTTCGAAATCACGTGGCCCTCCATTCCCAGA	A. mellifera CDS
TATTCACAATTTTTGTTCGTATATTTTACAA	A. mellifera CDS
AACGGGCTCTTTTCGATCCGATATATATTCA	A. mellifera CDS
CTATAAATGATATACTTTAAATTCTACAAAA	A. mellifera CDS
TGCGAGAACGTCGACAAGCAGCAGCAGGGCC	A. mellifera CDS
AAAATGCGCAAATAGCACATAATGTTTATAT	A. mellifera CDS
CCTGAACGCGCCGTACAGCGCGGCACTTCCG	A. mellifera CDS
AACAACCTCAGCCTTCTCGTTCGGGTATAAC	A. mellifera CDS
AGACTATTTGCATCAACATTTTTATATTGCC	A. mellifera CDS
ACTGTGAAGTGAGTCAAATCATTTAAAGAAT	A. mellifera CDS
ATCATTCTACAATACCTCAAAAAATGAAAAA	A. mellifera CDS
AAAGTAATCCACATATATCTAAAATAAGAAA	A. mellifera CDS
GCACGTGCCGCCCGTCCCGTTCCTAGGAAAC	A. mellifera CDS
CGTTTTAGGTGTGATTGAAATTGTGATTTTA	A. mellifera CDS
TAGCATAAAATAGTTCACCGCTATAACACGA	A. mellifera CDS
AAAAAAAGATTCTCAAATATGTGATTTGAGA	A. mellifera CDS
CAAAACGCAACATTGGATCTTTGTCAATGGA	A. mellifera CDS
GTAAAAATTTATATTATCAAGTGATAGGAAC	A. mellifera CDS
AAAAACAAAAATGTGTATATGTTCCTAAAAT	A. mellifera CDS
TACGAAAGCCCTCGACAATACAACGTGCAAA	A. mellifera CDS
AAACGTTAGATAAATTGGCGTTGCAGGATCA	A. mellifera CDS
TATATAACAATAATAATTTAAGATATGAAAA	A. mellifera CDS
AAACTCAACGACGAGAAGTAAATCGAAAATT	A. mellifera CDS
CAATCTAGTAGACTATATATACCGCGGTAGA	A. mellifera CDS
AGGACAGGATGTATAAGCAAGCGCAAAGGAG	A. mellifera CDS
ACAATTTCATTGAGACTTCACAACAGAATTC	A. mellifera CDS
ATTGTTGTTGGCCACCCACGCAATGTAGATC	A. mellifera CDS
AGGGCCTATTATTGAGATGTCTACTTATGGA	A. mellifera CDS
CGCGGAAAACGATATTTATTGTTCTTGTTAC	A. mellifera CDS
TATTAGATGTACACGAAGTGCTACCTAATGC	A. mellifera CDS
ACTACTAATTTTGAGACGAATGCCGGAACGC	A. mellifera CDS
CGAATTTCGCCAAATATCCGTTACGCGATCC	A. mellifera CDS
TATATTTATACACTCATTAATCGCTGTACTC	A. mellifera CDS
CGAGGCGGAGCGAAGGATGTCTGATTTACGA	A. mellifera CDS
CACCAACAACACCAACAAACGAGTCATCATC	A. mellifera CDS
GATCCAGGAACCTGCGCCACGTTGTTTCCAC	A. mellifera CDS
AAAAACGAAGTTTGTTCGTCTCTCTATTTTC	A. mellifera CDS
CGGCCATCACGCCGCCATCGCTGTCGCTCGA	A. mellifera CDS
CGGGTGCAAGTGCCGAGGACGTTATAGACGA	A. mellifera CDS
ATGATAGATGAAGCCTTATTACGACCTGGTA	A. mellifera CDS
AATTATCCAGAACAATTATTTGCTGATGCTA	A. mellifera CDS
AATACTTCATCTTCGATGCGGAGAAGACTGG	A. mellifera CDS
AGATATAGATTTAATTCATAGACGATCATTA	A. mellifera CDS
ATACGATTCCACGAAGTGTGAATCGAAACGC	A. mellifera CDS
CTGGTCCGACCAATCTTATTACAGCGAAAAC	A. mellifera CDS
ATAGATCCTTTCTCGGGTTCGGAGATCGAGA	A. mellifera CDS
CCGCGGGCTATCCTCTAGGAGGATATCAAAC	A. mellifera CDS
TATTATGCAAGGAGGTTTTAGTTATCGGGGA	A. mellifera CDS
ACAAATCAAATTTGATTTTGCAATTATTATA	A. mellifera CDS
AAAAATTCAAAAGAAAGAACAGCTTGGATAT	A. mellifera CDS
AATGCAATGATGAACCGAAGAAGGAGGAATC	A. mellifera CDS
CTTCCAAGATCGACTCCGACTCCGAAAATAC	A. mellifera CDS
TATAAAAGGGTGATTAACTTTTCTTGCCTCA	A. mellifera CDS
ATGTTGCCCGGAATTCTTATGTTCCTCTGCG	A. mellifera CDS
CCACCTCTTAAATTGTCGCGGAGAAAAGTCG	A. mellifera CDS
CGATTAAAAATCTGATAAAGGAACTTAACGA	A. mellifera CDS
ATGGAAGCATTAACGCTTCTGGTTGTTTACA	A. mellifera CDS
AAAGGAATCGACGGTTAATGGAAGAGAGGAC	A. mellifera CDS
CATTGTTCTTTTTTAGTTTTCTCTCTATTAA	A. mellifera CDS
ATCATACAAAAAATTCTAAAAACCAACAATC	A. mellifera CDS
CACATAGTAAAGACTATATACATAGAGTTGG	A. mellifera CDS
ACTGTGGAAGAGAGGAAATTATTAGAATGCG	A. mellifera CDS
AGTGTAAAAAATTTTTGAAGAGACGAGATCA	A. mellifera CDS
TCATACGGGGGAGAAATTGTGCGTACACGAA	A. mellifera CDS
TAAAATTACAAGAGCTAATAGATAATGATCC	A. mellifera CDS
TTCAACGTTGTCAAAGAGTTTGTGGGGATCC	A. mellifera CDS
CGCAACACGGGCCCTGTTCGCTCCTCGTCGC	A. mellifera CDS
TCCGCGTGTCGGATAGACTGTGTCGCCCACC	A. mellifera CDS
ATTCGTTATTCCGGCATTACGTGATGCGTGA	A. mellifera CDS
TGTGCTTTTTAATTGTATAATTGTATTCAAC	A. mellifera CDS
ACTCTTCTTGTTCGTGATTATTGAGAAAACG	A. mellifera CDS
AAAAAAAAATCTTTTAAAAAAGAAATGTTTA	A. mellifera CDS
CAATAAATAAATCGAGCATATAATGTAAATC	A. mellifera CDS
TAAATTCCAAGCATTTCTGCCATTCTATAGC	A. mellifera CDS
ATTGTATTATTAAAATTAAATTTGTATAACG	A. mellifera CDS
AATAAAGCAAGGATATGGACTAACAGAAACT	A. mellifera CDS
AACACGACCGTCGTCGCCTCGTTGACGGGGT	A. mellifera CDS
AATTTTCATTGTTTATTAAACTATATAATTC	A. mellifera CDS
AAAAGCTTAATTTCCTTTGTGGGGGATAAAG	A. mellifera CDS
CATATAGTGTGGTGTTGCGTGCTATTCATCG	A. mellifera CDS
AATTCGTAAAATCTGTCGGGTTGAAAAGTCA	A. mellifera CDS
ACATGATGTACTTTAGTAGGTAAAGTTTGTA	A. mellifera CDS
AGAGGATATTGCTAAAGTATGTCATGCTCCA	A. mellifera CDS
AAAATATTGTACATAATTTAATTCCAAATGA	A. mellifera CDS
CCTTGTAATCCAATTTATTTTCCCCACGAAA	A. mellifera CDS
AGATATAGAGCTGGCAATTTTGACTTGAAAA	A. mellifera CDS
ATGGGACAAATGTTTATGTATGATATGTATC	A. mellifera CDS
ACACGCGTTGACGATAGACTCGTTGCGCGAG	A. mellifera CDS
AGGGTAAACTTGGCGGGACGTGGAAATTAGG	A. mellifera CDS
AAAACTCGACACTTATTATACTTTTACGGCT	A. mellifera CDS
AAACATGATATAAAAGATTTTAATAAATTTG	A. mellifera CDS
GATGATTGGACCTTGGCCTCCCGTTTCGAAC	A. mellifera CDS
GCCTCAAGAAACTATACGAAATTGCGCTGAC	A. mellifera CDS
CGTGATTCTGTCGTATCCAAATACGGCATTA	A. mellifera CDS
CGAACGATATGATGAGTAAGTCGTCGACGGA	A. mellifera CDS
ACAAGACAACCATGAAACATAATCGATCTAT	A. mellifera CDS
CTGTCTCTACCTCTCTGTCGTTCTTTCGTTC	A. mellifera CDS
TTCAATTAATTTCTGCGCATTATTCATTGAA	A. mellifera CDS
ATTTGTTATAGAATTTTTTTTTTTCTTCATA	A. mellifera CDS
CCTCATGATTGTCCAATCCTTGCCAACAAAC	A. mellifera CDS
TCACGAATTGATGATGGAGGCGCGTAAACGA	A. mellifera CDS
AGTTAAGTAAAACAATAACAGAATTACAATC	A. mellifera CDS
CAACAACAACAGCAACAACAACAACAGCAAC	A. mellifera CDS
AAAGTAACAACACAACCACAAATAATGGCTT	A. mellifera CDS
AATGAGACATCGACATTCAAGAAACAAAAAT	A. mellifera CDS
AACTCCGCCCACTACTACAACTACTATTATT	A. mellifera CDS
AAAAGTGAGGAACTGTATAGTAACGCATTGG	A. mellifera CDS
CAATCGCCGGCTGCTAAATTTCCAGTCAACA	A. mellifera CDS
CATTTACTGCCTGTTCTCGGAAGATTTCCGA	A. mellifera CDS
CTAATTTTTGTTAAGTATTTAGTTTTTGCTA	A. mellifera CDS
AAAAACAAATTTATCCGGGAACTCGTCAATC	A. mellifera CDS
AAAAGAATTAATCACAGATCGCAAATTAGAA	A. mellifera CDS
TTAACAAAAAAAAAATCGATTTTCAGTCTCA	A. mellifera CDS
AAACTTGTAAATTTTTTTTTAGCCGTGAATC	A. mellifera CDS
GAGAACTTTGGGATTGGCTAATTCCATTTAC	A. mellifera CDS
CAATCAAGTTAACCATGACGAGTCTTCGTGA	A. mellifera CDS
ATAAATGTATATGTTCTTCTTTGTATAGTTA	A. mellifera CDS
AATTTTGCAACATCAACTGCTAAAAAGGTTA	A. mellifera CDS
CATGACGCGATAGAAAAAGCGAAGAAGAAGC	A. mellifera CDS
ACCCAATGAGGAAGAATCCAATGAGAAATCT	A. mellifera CDS
ATTTGATAGTGTCGCAAAAAAACGTCGCAAT	A. mellifera CDS
ATTTTTTCTGTAATCGATATTATTTTTAATA	A. mellifera CDS
ATAGTAATATCTATGTTGTTCTTTTCAGATG	A. mellifera CDS
AACGAAAGATCGACTCGACGAATCTCCATTC	A. mellifera CDS
AACTTGTCATGATACTGTCTCTTGGTCGAGT	A. mellifera CDS
CTTAGCCTCTTTTCCCGCCAATTTTTATTTC	A. mellifera CDS
CAACTATGCATTTGGGAATGTACAATTGATC	A. mellifera CDS
AATTAAGAAAAATGCACGTAAATAATCGTAC	A. mellifera CDS
TTGTTATAATAGAAAGACCTGGAGATATACC	A. mellifera CDS
CCAGATGGATACATAATTGGTATAACTGGCC	A. mellifera CDS
ATCACATCGTGTAGAGGATATCCGATACTTA	A. mellifera CDS
AATTCGTGTCTGCGCAGGATTCGTTTCGCGA	A. mellifera CDS
AATTCTCAATATGAGTCGACGAAAAACTCTT	A. mellifera CDS
AAACAATCTGATTGTTTGAAGGAGAAAAAAT	A. mellifera CDS
AGATGCTGTCGTCCAATAGTTAATGTGTCCA	A. mellifera CDS
AATAATCTTATTCGAAGAGAAACGAGTCGAA	A. mellifera CDS
AAACATATTATTCATAAATCAAAAGATGTTC	A. mellifera CDS
CAGTTTACAGTAACAGTGTATTTCTGCAGTC	A. mellifera CDS
AATGGAAGGACAAATGAAAGAAGCAGAAGAA	A. mellifera CDS
CAAAGCTTCGTTGCCCAAGACATCGACCTAA	A. mellifera CDS
AAGATGATGACCATAAGTTTTAGCTTAGACA	A. mellifera CDS
AGCCGGAATTGGCGAAGAAGCAAAAGATTGA	A. mellifera CDS
ACGGAATTCCAGGTCGAGACCGACCAGGAAC	A. mellifera CDS
TTGCGATCGCAACAGCGTCAGCAAAACCCGC	A. mellifera CDS
AAGATTCGAAGTGGCAAAAATAATATTCCCA	A. mellifera CDS
ACGATATTAAAATTGAGCATATTAGTTTCTC	A. mellifera CDS
ATGCAGATGAACATAAATCTCTTGGAGCAAA	A. mellifera CDS
ATTGAATCCCACTATGGACAAAATAGCAACG	A. mellifera CDS
TGCAGTTCTTGTATAGTGAAAATAATAAAGC	A. mellifera CDS
ATCCGCTACCAAAGAGAGAGAGAGAGAGAGA	A. mellifera CDS
TACTTTCAAACTACGACAATTTTTCTCAAAC	A. mellifera CDS
ATTGTTAACAAATGCGATAAAGTAAATATTA	A. mellifera CDS
ACAAGATAAATCCACAATAAACATCGGGGAT	A. mellifera CDS
ATACTTATTGAAAAAGGGCGGAGAATGGTCG	A. mellifera CDS
ATCAATATGCGTTTAAAATGTCGCTGTTCAT	A. mellifera CDS
TAAAATTATAAGTATATAATACATTTAAATA	A. mellifera CDS
ATTGTCAGGATTCCCAAGAATTTCGAATTTC	A. mellifera CDS
CGAATGTACGTAACCCTCGAGGAGGAGGCGA	A. mellifera CDS
AATACTTTCAGAGAAAAAATGAATTAGCTCT	A. mellifera CDS
CCGACTCGAGGGCCAAAACTATTTGAAGATC	A. mellifera CDS
AATATATAACCCAATGGTAGCTGCAAGCTGT	A. mellifera CDS
TATTCTATTTTTGAATGGCCATCAATAAATA	A. mellifera CDS
AAAATATATATAGTTGGAGAAAACTTTCATG	A. mellifera CDS
CACGATCGGGCGTGAGTTTCGCGCCACGATC	A. mellifera CDS
CGTTGTCATTTGAAGTAACTGAATGATCGAA	A. mellifera CDS
AGCTTTATTTGGCAATTGAAAGTAAAATATG	A. mellifera CDS
CGATCTCGATGATAATCGCAAAAGAATCAAA	A. mellifera CDS
ATAATTTTGTTATTTTCTTTTTATTATACAT	A. mellifera CDS
ACCTATTTTCTGCTATTTCCTGTCTCCAACA	A. mellifera CDS
GTCATAAGTAATCTTGACAAGTATTTTCCAC	A. mellifera CDS
AATCAATTTGCATTCCTCACATCACAAACTT	A. mellifera CDS
CCTTGGCAGTAGAATAAAGGAGAAATTATTA	A. mellifera CDS
ATATAATATATAATATAATATAACAATTATA	A. mellifera CDS
ATATTAAGTCAAACAATTTTATATAATGTTA	A. mellifera CDS
ACATCCGACGTGAGAGCTGTAGCAACCTTTG	A. mellifera CDS
TGTAATAATAGATATGCATCCAAAGCATTCC	A. mellifera CDS
TCACCATAGCAACGAATCTGTGTTTTGAAAC	A. mellifera CDS
TGACGGATTGTGCAGTTTTTATGGCCATTAC	A. mellifera CDS
ATTAGAAAAAATATTCAAGCAAAAAACTCAA	A. mellifera CDS
TAAAATTTTTCTTTATGAATCCTATTGAAAA	A. mellifera CDS
TAAAATTTTTAATCTTCTTAATTTTTTACAA	A. mellifera CDS
ACGCGGTGCAGACGGGAACACGGGTTGTCCG	A. mellifera CDS
CGTGCTCAACCTCAACCAGCTTATAAAGTTC	A. mellifera CDS
ACCAGTATCATATAATAAAATACAAAGATAT	A. mellifera CDS
TAAAAGTTCACTACTATTACGATTTGCTGAC	A. mellifera CDS
AAATTATCAGAAGTAGTTATAAGAAGATACC	A. mellifera CDS
AAGAGAAAAAGCTCAAAAAAAAGAAATTGAA	A. mellifera CDS
ATATAAGTTCGATCGAGGAACAGAATAAATC	A. mellifera CDS
AATTTAACTGGATGTAATTATTTTTTATCTA	A. mellifera CDS
ATATAAGGTGATCATTTTAATTTAACTATCT	A. mellifera CDS
ATAGACAAACAAGTATGATGGCAGACTTTTG	A. mellifera CDS
ATTGTCTAATAATCTCTTGAATATATGATAA	A. mellifera CDS
ACTTCAAGAATCTATTTATCCGCTTGTAGGA	A. mellifera CDS
ATCACAATATGAAACTCCAACAACAGTTGCT	A. mellifera CDS
AGGTTGTTATAAGGCGCATAAATATAAATAA	A. mellifera CDS
AGAAACAATGTAAAGTAACCACTCACTTGAC	A. mellifera CDS
AGTTACAAAAAGAGAAGGACAAGGATCACAA	A. mellifera CDS
ATCTTCGAAATCTAATCTAGATGTAATTGAG	A. mellifera CDS
ACCGATATACGAATTTTATTTCAAGTCAGTA	A. mellifera CDS
TCTCGACGAGGCGCGCGTTGACGGTGCACAA	A. mellifera CDS
TCGAGCGATGCCAAAGCCGTCGTTATCCTTC	A. mellifera CDS
TATACATATCAAACACATATATTCATCAATA	A. mellifera CDS
ATATTCGCCGAATGGAAATCATAGCATAAAT	A. mellifera CDS
TAAATTTTGGAGTGGTTTTGATATATCTGGA	A. mellifera CDS
CTGACTCGTAGTAGAAGTCGTACAAACTTGA	A. mellifera CDS
AACTGAATTTTTATCTGAATTACCAATAAAA	A. mellifera CDS
CTTCCATCCGCTACTCGATACACGACGAAAC	A. mellifera CDS
CGCCTGCCTCCATCGTTTCTTTTTGATCTGC	A. mellifera CDS
AATGATCAAGAAAAAAATAGAACCATCTCCT	A. mellifera CDS
AGAGCCTAGGGTAGATTGCGATTAACGGTCG	A. mellifera CDS
AATCAATTAATTCACCGAAGAATAAATGAAT	A. mellifera CDS
TTTTTATTGGATTCGAGTTATACTTGCATCA	A. mellifera CDS
TTTGCGTAGGAGGATGTAATTTGCACGCATC	A. mellifera CDS
ATTAAATGTTAAAATAAAGGTAGAACCTGGA	A. mellifera CDS
AGAGGAACATCGCAGTATCGAAGTTTCCGAG	A. mellifera CDS
ACAGCTAATGTTTTATCCGATTCTGAAAGAA	A. mellifera CDS
AAATAGATATACTTCGTTCTTCCTTGGTCTG	A. mellifera CDS
AGGGTTAAAATTTAAAAATATTTCCAGGTCG	A. mellifera CDS
AAAAAAAAAAAAGGAAAAAAAGAATTGCGTG	A. mellifera CDS
CAACCAGAGCGTGATCAGCAACGACAAGCAC	A. mellifera CDS
ATAATATTTAAATGTTTTTTTAACATATAAA	A. mellifera CDS
TATAGTTTCATTAACTATTCTCATTTACAAA	A. mellifera CDS
AGGGCCGCGAAGGAGGGGGGAAGGGTAATCG	A. mellifera CDS
TGAGCGGCACTTGTTTGGAGTGTAAGCCTCA	A. mellifera CDS
TTTTTTCAAGAAAGCAAGAATTGAAAATATC	A. mellifera CDS
TATTGGAAAAGTTATGGTAGAACTGAGAAGA	A. mellifera CDS
AATATTAACACGTTCGGTCAACTCATCTTCC	A. mellifera CDS
CTGAGCATTATCCTCAAGCAAACTCGCCTAA	A. mellifera CDS
ATAAGGAGGGGGGGAAGGAGAGGGCACCCGG	A. mellifera CDS
GAAACAGCAGAATCTTACCATTGGATACCTC	A. mellifera CDS
CCACCCCCTGCCCGTGTTGCGAATGGAACAC	A. mellifera CDS
AGAACGTGCGCTTATACTAATCATACAGTTC	A. mellifera CDS
AAAGAAATAATTCAATTTTTATGGATCAATG	A. mellifera CDS
CTTATGAAAACGAAAAATATATAAAATATAA	A. mellifera CDS
AACTGGCAATTTCGAAGATGATTTTGTTGAT	A. mellifera CDS
ATAGACAACACAGACCATATAATAGACGTGA	A. mellifera CDS
TAACACCCGTATAAGTAATTACATAGAACCA	A. mellifera CDS
ATCTCGTAGAATCGAAATCCCCGTGTAACAA	A. mellifera CDS
AATTTCTTTTTGAACAAATACGCGAAAAAAT	A. mellifera CDS
AACCTATTCTGTTAGAACTTGAAGCACCACT	A. mellifera CDS
ATGTGTGATATTAGAAGTACAGGTGAAAAAA	A. mellifera CDS
TCTACAAACAGCTCTACCAACGTGTCGAAAC	A. mellifera CDS
GCAATATATTATGATGGAAAAATAGACATAC	A. mellifera CDS
ATCATTTTCTAAATTTGGTCAATTTTATGAA	A. mellifera CDS
AAGGAATCGGTGGAGGTATTAAACACAAATA	A. mellifera CDS
AAATTACAGGAAAACCTGCTTTAAGAGATGA	A. mellifera CDS
ATAGAGAATTATCTATAACAGTTTCTAATCA	A. mellifera CDS
AAGAATCGTATTTATTTCTTTTCATTTATGG	A. mellifera CDS
AATTAATCAACCTAAAGATGCAATGACAAAA	A. mellifera CDS
CATTTTTATTCTTATATAATGCATAGTAGCA	A. mellifera CDS
AAGTGGCTGTCTTGGAACATTTTGCCAAATC	A. mellifera CDS
AAATTCCTTCCGCTACTGAATGTGAAAAAAT	A. mellifera CDS
TCGATGAAGAGGAATTTCGGCGCGACGACAC	A. mellifera CDS
ATGATACGTAAATTATTAAGTGCAATGTTAG	A. mellifera CDS
AATAAATTACTTTCAAATCTAATTCAAGAAT	A. mellifera CDS
CAGACTCTGGGCACTCGAGAGAGCGTCAAAG	A. mellifera CDS
ATTTTTGCTGTCTCGAGGTCTAACTTTCATA	A. mellifera CDS
AACCAACGAATGATAATATTGAAAATAAATG	A. mellifera CDS
AAAGAGAAACATAAAGGGAGAGTGACAAGTA	A. mellifera CDS
TCTCCGAATATCTTGCCTAAAAAAAAAAAAA	A. mellifera CDS
AAATTTCAAAGCACACTAATAATGATTTAAA	A. mellifera CDS
ATATGATTCAACCAGAATTAGCTAAAACATA	A. mellifera CDS
AAATAGATTTTTATTACAAGTTTCTTCATAT	A. mellifera CDS
CAGGAGTAGACGGTCAGACGGTCTCTCCCGC	A. mellifera CDS
CGAACACCATTTAGAGTGTTCCTAGATATGC	A. mellifera CDS
AATAACTTTGGAATCAGCAATTCACATATTG	A. mellifera CDS
CGATTAACAACCGCGCGGAGTAACACGCGGA	A. mellifera CDS
TCAAAATAATAGCACTACATTTGGTAAAGGA	A. mellifera CDS
AGGGATGGAACCGAGCGGAGCGAACCGAGGG	A. mellifera CDS
CGAATGGCTAAAAGACAACGTAGACAAGATA	A. mellifera CDS
ATGTACACACGAGAAATAAAAATAGCAATAG	A. mellifera CDS
CGAGATAGTGTATATGGTCAATATGTGAAAA	A. mellifera CDS
CAATAGTGAGAGATAATCGTGAATGTTTGGG	A. mellifera CDS
AGTTTTGGGTCTTGATAAACTTGCAAAACGA	A. mellifera CDS
ACACGAGATATGCTCATTTATGCTAGTAGTG	A. mellifera CDS
AAAAAGAAATAGAACATAATACTATATGTAA	A. mellifera CDS
TAATATGTATTTGCTTTTAAAATGAAAAAAA	A. mellifera CDS
CAAATAAATAATCATAAAAAAAAAAAGAAAA	A. mellifera CDS
CTGGAGATAAAGAAAAATCTCAAAATAAACA	A. mellifera CDS
CTCTGCACGAGGCCGCTTATCACGCCGCTCC	A. mellifera CDS
AAGAAGAGAGAAGAAAGAAGAGGATCGTACA	A. mellifera CDS
TCGTTGAAAGAGTTACTACACGCGTACGATC	A. mellifera CDS
TCAGAAAAAAAAAAACTGATTGACGATAACC	A. mellifera CDS
AAATATTTAAATTTTTCAGAATGTGACAGAA	A. mellifera CDS
ATTTGTTGAAATATTTCTTTCCGTCGAAGAA	A. mellifera CDS
GACGATGCGTGACGGCTCGTCGTGTCGATCC	A. mellifera CDS
TATCTTTAAAAAGTCTACATCGTGTTCTTCC	A. mellifera CDS
AATGGATGCTTTCTCGAGGAACAATGACGCG	A. mellifera CDS
CGTTTCGAGCGAGCACCTCGAGGGAACGATC	A. mellifera CDS
ACGCGACTACGGAGGATCTGACTATCTCTTG	A. mellifera CDS
TGTTCGAATCACCATTTGGATGTAATCGAAC	A. mellifera CDS
ATTTTTAACTCGGCGGGAAACAAGGAAACAA	A. mellifera CDS
CGTAGAGAAACTTTCTTTCAAGGATCTCTAC	A. mellifera CDS
AAGAAAAACGTTTGTAAACGGGCGATACGAA	A. mellifera CDS
CGGCTTTTTTTCAAGGACAAATTGAACGTCC	A. mellifera CDS
ATGCGCCAGTCCACAAACCGCAATAAAGAGA	A. mellifera CDS
AAAAAAGGAAAGAATAATTTTTGCGTGCCAA	A. mellifera CDS
ATTGTACCTAAATTTGTTGAATTTCTAGAGA	A. mellifera CDS
CGCCATCTTGAGTAGCATGGCCCAGCTAGAC	A. mellifera CDS
TGTTATTTTAGTGTGCACGAAAATTAATCAC	A. mellifera CDS
AATGTAATATGTAAAACATTTTATATTTTGA	A. mellifera CDS
CCTCGCGTATCATACCTAGTCTCGAAGAATC	A. mellifera CDS
CAAATTTATGATCAAATACAAAGAGAACAAC	A. mellifera CDS
CGATTAATTGGACGTTCGAGACGTATCAAGA	A. mellifera CDS
AAATGAACTGCTTTTGAAAAACAATATAATA	A. mellifera CDS
AGCGAATCGCCGCCGAACCGCGCCGATTTCA	A. mellifera CDS
ATTATTTCAAAAATGGGTGTTAAAAGCATTA	A. mellifera CDS
TCACGTATGAAAATTCCTCATTTGGAATTCA	A. mellifera CDS
AAATACTGGATCTTTCATTATTAAAGATATT	A. mellifera CDS
AAGTATCGTTAAGATTCCATCCCGAACTGTC	A. mellifera CDS
TATAGTAAGCGAATGCGATGGACAATATACA	A. mellifera CDS
AATACATCAGGTATTAAAGTTTCCAAAAATC	A. mellifera CDS
CTCCTTCTGCACCTTTTTAGGGTACAACGAC	A. mellifera CDS
AAATATAGATGACGTTTGTATGGATGATAAA	A. mellifera CDS
ATCTAGATAAATAGATATGGAAAAACATACG	A. mellifera CDS
ATTCTCGTGTTTCATCGGTCATATAGTTTAA	A. mellifera CDS
CCAGAAGTAGTAGAAGGACGAGGTTTTCAGA	A. mellifera CDS
AATATGGAGACAAAACTTTGAATAAAATTAA	A. mellifera CDS
AAGCGGCCGACTTAACGACTGTTCGATACCT	A. mellifera CDS
TACAGGAGCCACGAGGTGGACCGCGACGACA	A. mellifera CDS
CCACCTTATCAACGTGGTGGTCGGTTCCGCC	A. mellifera CDS
AATGTTGATTTTGATAAACTTTAAATCTTTC	A. mellifera CDS
TAAATTAATAATCATGACTGTAATTATTTAC	A. mellifera CDS
TAAAATTAAAACATTAAAACAATATATGATA	A. mellifera CDS
AAGCCATGTATCATGGACGTTCAGTATTCAG	A. mellifera CDS
TTCTCCTCGTGCCATTGAGCAGCCCTCGACC	A. mellifera CDS
TGCAATAAATCTCGGAAATTTGAAACGCTTC	A. mellifera CDS
ATAGGTCTACAACGAATGATAACAACGAAAT	A. mellifera CDS
CGACAGAAGAAGAACCGTTTTTTGATAGATC	A. mellifera CDS
AACATTTATATTATACTAACATTTTATGGTT	A. mellifera CDS
AGGTTCTCCAACAATCTCATCAACATGGCGC	A. mellifera CDS
ATCTTCCGCAATGGAATGGAAGTCAAGATCT	A. mellifera CDS
ATGAAGTCATTAAAAGAAAATATTTTACAAC	A. mellifera CDS
TTTGAAAACCACGCGTATCACGGATACACTC	A. mellifera CDS
ATAGATGTTAATTTAGTGCTAGAAAGTGCAG	A. mellifera CDS
ATCGATAGACATTTCCGTCTCTCCTTCTATC	A. mellifera CDS
CTCGTGTTAAACTTTCTCGTTATTTTCACCG	A. mellifera CDS
AACGACGTTTCTGTGTACCTCGTCGCCTCGT	A. mellifera CDS
ATCTTGTATAATGTGTTACTCAAAATGGCCG	A. mellifera CDS
TTTTTTTTAAACGATGGCGAGGATCACCGTC	A. mellifera CDS
CGCCATCTTCCACCGCCGAACCGAAACGAGA	A. mellifera CDS
ATCCAACTTTTCTTAACCAACTTGTTTAATG	A. mellifera CDS
ATTCCAATTTCACAAGATATATTTTTAAAAA	A. mellifera CDS
TTTAAAACTTCATATTCGAATACTGAATATC	A. mellifera CDS
ATGGCTTGCAGTAGATGGCATAGGCAATGTA	A. mellifera CDS
ACCTCTTACAATTAATAAATTCGAGGGTGAT	A. mellifera CDS
TAATTGTTATTGGACTAGTTTTTACCTTAGA	A. mellifera CDS
ATTATAGTACAAAAATTTTTATAAAAATAAT	A. mellifera CDS
TAATTCAGTATGTTTTATTTTTAATATTGTC	A. mellifera CDS
TTCAAAAAAATACAACTAAATCTCTTGGATC	A. mellifera CDS
ACAAGAGGACCGAAGGGGATCGAAGGAGATG	A. mellifera CDS
CCGCCGACCTCGAAGGAACGAAGGACGAAAC	A. mellifera CDS
ATATATCTCCATGCGGATGGAACAAACAGAT	A. mellifera CDS
CGGACACGATTAGCTCGTATTTCGTAGGGAA	A. mellifera CDS
CGAATGTAATTTAAACAAAAGATTCGCCTCG	A. mellifera CDS
ATCGAAAAAAGAGGGAAAACAAAGAAGAAGA	A. mellifera CDS
ATTGTCAACTTAGATATGTAATGATAATATA	A. mellifera CDS
AAACAGTATTTTTACGCTTATATTAATTTAA	A. mellifera CDS
CATCGATCCTTTGCCACCCTCATCCAATGAA	A. mellifera CDS
AATCAACTGTGGTCTTCGTTGGACCGTTCGA	A. mellifera CDS
AATAATTTGTTCGTAAAATTTGTGCAAATTC	A. mellifera CDS
ATCAAACACTACAGCAGGAAATAATGTTCAA	A. mellifera CDS
CATCCTCGACATGCTTTTCTCACAATGTTGA	A. mellifera CDS
CGGGATTCTCCGCGAGGATTTATTTTCGGTC	A. mellifera CDS
AAACAACAACGTAATTTAAAAAACAATACAT	A. mellifera CDS
TTTCCGAATATACCGTGCTTTTAAGGCACGC	A. mellifera CDS
AAAATTATAGAAAATATAACTAATATTCAAG	A. mellifera CDS
ACGGTCGAAACGGTCGCGTCGTCTCGAGCGC	A. mellifera CDS
AATCCTGTTCAAGAGTTTAATAGAGATCTTA	A. mellifera CDS
ACTTGGAAAAGATGCGAAATATGCTGGTCTC	A. mellifera CDS
AGGATAATACAAAGAGATAGATTGTTCCTCA	A. mellifera CDS
ATATATGATAAAAAATAAAATTTTACCTGTA	A. mellifera CDS
CCGAATATCTCTCCATTAGCCCCCCTGACGG	A. mellifera CDS
AAAAAAAAAAACAGCTAATCATTCAATTTTT	A. mellifera CDS
AAACGAATATGAAACAAATTTTATGGAACAA	A. mellifera CDS
AATTTAAAAGGAAAGCAAACAGCAACTAATA	A. mellifera CDS
TTACTTCTTATTCGAACGAGAGAAAATTTCA	A. mellifera CDS
ATACATCATTAAAAGATGAAAGTTTAAATGA	A. mellifera CDS
CCTTGGTCTCTTGTGTGTATTTTCCCTTCTC	A. mellifera CDS
CAATGAGTAAACTATATAAAAGGGATTTGAA	A. mellifera CDS
TATTCAAAAGCTTTAGATTCTGTAATGGCAA	A. mellifera CDS
AAAACGAAAGAACGCTTTTTAGCATCACGAA	A. mellifera CDS
AGGGGAGCAACGCAGGAAATTCTAACAGATC	A. mellifera CDS
AATACGTAAAAATTATTTATTTAAATTTTCT	A. mellifera CDS
AGTTTCGGCTACACCAAATGTTAAAATAGAA	A. mellifera CDS
AAACATGTATAGAAAACGAAAATAAGTGAGC	A. mellifera CDS
TTTAAAATAGAGGAAGAAAAAGTTGAAAGTC	A. mellifera CDS
TCGGAAGAATCTGTTGATAAATCTAAAACCA	A. mellifera CDS
ATGAAGGGAGGTGCGTTCCTGGTAGCCGCGG	A. mellifera CDS
CACTGGCGATGCAAAAACTCAACGCGATCAC	A. mellifera CDS
CAGAAAAGAAAAGCAAATAAATATATATAAG	A. mellifera CDS
CAAATGAAAACTAATAAATCAATGCAAAAAA	A. mellifera CDS
AATTATATACGAGAATCAAAATTGGAAGATA	A. mellifera CDS
ATACAGCAATTATTATGGCTACGTATGAAGC	A. mellifera CDS
ACATGGTATTGCTCGCAATTATTGAATTACT	A. mellifera CDS
ATCTGTGAACCACTCATTAAATCTTGAAATC	A. mellifera CDS
CAACTTTCAGAGGACATGGTGGTAGTGTAGA	A. mellifera CDS
ATTTTGAAGAAAATGAATTATTGCCTTTGAA	A. mellifera CDS
TGGTGAAAGCACTAGAAATACAAATCGCGAC	A. mellifera CDS
ATTATCTGCCAATTTGGGAATAGCTATAGCA	A. mellifera CDS
AGAAAAATATACAAAAAATATCAGAAGTAAA	A. mellifera CDS
ATTGAAAAAAATTTAAGAATTCAATGCTATG	A. mellifera CDS
CGTATCCTTGTCGCACAACTTCGTTGTAAAA	A. mellifera CDS
TTGAGTGAAAATTCTCTAACAAGTTTACCAA	A. mellifera CDS
AGAGGACTTAGCGTCTAAAAACAACGAGCGA	A. mellifera CDS
CTTAAACTTGTCCATTCAAAATCAGCAAAAG	A. mellifera CDS
AAAAATTAAAAATTATTGTTAATAATTTTAA	A. mellifera CDS
ACGGATGAAAATGTTAAAATTATTAATAACA	A. mellifera CDS
TAATCACAGGAAAAGAAGACGCTGCGAACAA	A. mellifera CDS
ACAGAAGTAATATTAGCTGTATCTTATCGGG	A. mellifera CDS
CACAAGTGTGATTTGCACGAGGATCAGGACA	A. mellifera CDS
ATAGTATCTTTCTCAGAATATTTTTAGATAA	A. mellifera CDS
AATTAAAATTTCTTGTAAGATAAACAAACAT	A. mellifera CDS
CGGGACGAACGGAATTACCAGACAATTTGAA	A. mellifera CDS
CTTACTACATCACTATATTAATTTTATATGA	A. mellifera CDS
ATAATCTTCGATAATATCGTTTGAACATTCG	A. mellifera CDS
ATCGATGCCATTCATCTCATCATGCACTCTG	A. mellifera CDS
TAAAATTACGCACAGATTAATAACATACAAC	A. mellifera CDS
GTACAAATTAAAGCAGCTAGAATCTTCCTAC	A. mellifera CDS
TCAGCCGTGGAGAACGAAAAGGTGGAGTGAA	A. mellifera CDS
ATAGATATTTAAATAGTTGAAAAGCGTGTAA	A. mellifera CDS
CGTATGATTGGTTATTGTATTCTCTCCCTCC	A. mellifera CDS
TTGGTCGAGGTAAATCAATTTCGAGTCCGTC	A. mellifera CDS
TCATCTGAGCAATAGCAGCTGCAACGGCACC	A. mellifera CDS
CGTAAAACTGTTAGAGAATTAATAGAAGATA	A. mellifera CDS
CGAGACCGACCGATTTTCAGCTTCGAAAATC	A. mellifera CDS
CATATGCGATAATAGCATTATTTTACGAAGA	A. mellifera CDS
AATCTGAATCAGATTATGAATCTTCATCGCA	A. mellifera CDS
ATCGATCTTGAATTCGCGATATTTCATGAGA	A. mellifera CDS
AGATTTTTTTATCAAACGTGAAATCTCAAAC	A. mellifera CDS
AACCTAATGAGGTAGTCTCTTTTTACATGTA	A. mellifera CDS
TCGAGTATCGGGAAAAATTAAATCGAGAGAA	A. mellifera CDS
TTACAATCGACCACGGACATGGGTTTACGAA	A. mellifera CDS
ACAGCTCGAGATCGCACGCTATATTTTTAAT	A. mellifera CDS
CCGCTCCTTTTTCCACGTGATTTCCAAACCG	A. mellifera CDS
AATTAGAAGAAGAGAAACGGCAGCAACAAAG	A. mellifera CDS
TAAACAACTTATCATCGAGGTTCGTAAATCA	A. mellifera CDS
CGTCAAATTGACCAAGGAATTCTCCAGCAGC	A. mellifera CDS
GAACAGAATAAGGAGAAAGTAACGGAGAAAC	A. mellifera CDS
ATACAAAGAAGAGGAAGCATTGAATAAATTA	A. mellifera CDS
AAAAGCGGAACAAAAGAAAAAAGAAAAAGTT	A. mellifera CDS
TGGCGCGTTACCCGGCGAAAAGGGTTCTCCC	A. mellifera CDS
ACCATTTACAATTGAATGTTATAGAAACATA	A. mellifera CDS
AACAGAGTATTTTCCAAACAAGATCGAGGTG	A. mellifera CDS
AATATACGGAAAGTATATCTGATATTTTCGA	A. mellifera CDS
GATCCATCACAAGTTGAAATGGTTTTTGCAC	A. mellifera CDS
AAATCAAGATGTCGAAATATCAACAATTACT	A. mellifera CDS
AACACTGGATCGTTTCATTACTCGAGAAAGT	A. mellifera CDS
ATCGTTGTGTTAAAATACTTCACACTTTTTA	A. mellifera CDS
TATAAGTCTCGAGAAAAAAAAACCAAAAAAA	A. mellifera CDS
TGTTACGGGCACACATCGAAAGAACACTAAC	A. mellifera CDS
CGACAACATGTCAAATTATTCAGAAGTTGCG	A. mellifera CDS
ATATATAAAGAATTAACTTTGTGCTTTTGAA	A. mellifera CDS
AAAGAAACGCGCGACAACCTATTACTAACAG	A. mellifera CDS
TCGTTTCCATTGCGGAGCCAGTCTCGTTACC	A. mellifera CDS
CAACAACAAAACGTGCCCCATCAGTATCATC	A. mellifera CDS
AAAAATTATTTCTACTCTCAAATATTATTCT	A. mellifera CDS
TGGATTATCGCATATTCGAATCAGCCATCCC	A. mellifera CDS
AGCGTCGTTGAGGAATCGTCGAATGACGTTG	A. mellifera CDS
CTCTAGATTTAAATTTTAGCCGCGACTGGGA	A. mellifera CDS
CACTAATAATTAAGAATTATTTAACTTAAAA	A. mellifera CDS
AAGATGTGGTATAAAGGGGTGAGCTTTACTT	A. mellifera CDS
CGGAAAATGATACTTTAATTGTATTAATATC	A. mellifera CDS
AAACTTATATTACTTTTCGTATAACAACAAA	A. mellifera CDS
ATGGAATTGTGCTTAAATGCTTAATGAGGGA	A. mellifera CDS
AATCTAATAATCGTTTCCGCTCACGCGGCTG	A. mellifera CDS
ATTCTGCGTTAACTACTACAATAATTGGATG	A. mellifera CDS
TTCGTTCATGGTTGATTCCTTTTTAAACGAA	A. mellifera CDS
ATAAAGTCAGTGATTTTTCTTCAAGGAAGAT	A. mellifera CDS
TATTCATGTTGGTTGGAATATGGTACAGGAA	A. mellifera CDS
TTGCAAAAATAATTATGGTGGAAGGACATGC	A. mellifera CDS
TCACTTTGAGAGATTATATGAAAAAAAAAAA	A. mellifera CDS
TCAAAAGATACTACATTTAAATAAAATATAA	A. mellifera CDS
AAGCATCTAGCTATAAATCCCAATATGGGAT	A. mellifera CDS
TAGAAGGATTTGCCGCACAGGCCGCAGGTCC	A. mellifera CDS
ACCGGAACGACTAGTTGTACAGCAAGTTCCG	A. mellifera CDS
CACACTATCTCGATAAGGTATGAAGACATTA	A. mellifera CDS
CGGAACGTTGGGCCTTCTTTTTCGATTTTAA	A. mellifera CDS
AAAATCAATATCGCTTCTTAAATAGGTTCCT	A. mellifera CDS
ACTAAACCATATAAGAAGAATCTTATGAGAA	A. mellifera CDS
CGAAATAATAAAGTATATTTTTCATAATTTA	A. mellifera CDS
TTTGCGACTACAAGATTGTTTTGTTAACAAA	A. mellifera CDS
TATTCGAACGTGCACAAGCAGTTTCAATGAC	A. mellifera CDS
CACGCTTTTCGGCGCGGTTCAGTGGCATTGC	A. mellifera CDS
ATTTCATTAACTTTATTATTTTTTTTCCTTC	A. mellifera CDS
AAAAAGAAAAATAAAAAGAAAGAAAGAAAAA	A. mellifera CDS
CTCGAGGCGTGGCGAGTTGTTCGTTGTAAAA	A. mellifera CDS
CCAGCAAGGATCGATACTATACCGTAGCAGA	A. mellifera CDS
GACATGCGTGCGGCTCGCCCTCGACGCAACC	A. mellifera CDS
AACTGGAAATCCGATAGAAATTCCTACTAAA	A. mellifera CDS
TATATGTAAAAAAAAGTCTCAAAGTTTGAGA	A. mellifera CDS
TTTAAAGAGTCTCGGGGACAGAAGACTTTTC	A. mellifera CDS
CTTTCAAACGATCGCTATCTAAACTTATTGA	A. mellifera CDS
TGTTTAAATTGAACTTGTATCTTTTTAAGTC	A. mellifera CDS
ATTCTGGATTAGAAATGCAAAAGGCCCACGA	A. mellifera CDS
AATGGTGGCAGTTTAGAAACAAACAAAAAGA	A. mellifera CDS
AGCCCCGTGACAAACACACGCGGCCTCAACG	A. mellifera CDS
AGTCAATTACCTCGTTCTGTTTGGGATCGTA	A. mellifera CDS
CAACCGATAACAAACGAATCCGCAAATCTAC	A. mellifera CDS
ATCAACTTGCTATTTTAGTATATATATATAG	A. mellifera CDS
AACAAAGAGATCAAGCATTCGCATAATACGA	A. mellifera CDS
ACGCGGTCAAACGATACTGAAGGCCGCCGCC	A. mellifera CDS
TTCCTGGTACGTCGACATGGAACGGCCGACC	A. mellifera CDS
ATTGTATGAAATTATTAGAAACATTTAAAGG	A. mellifera CDS
AAAGAAGTTTCAAAGCAGAAGAATTCGCAAC	A. mellifera CDS
AATAGCTCAGAACATGGAACAGGAGCTAATC	A. mellifera CDS
GAACCGACCAACCCCGTTTCCCGAATGATCC	A. mellifera CDS
AAAAAAGCATAAAGGGAAAATTGCGTGGCCT	A. mellifera CDS
AAGAAATGAGGAACCAGTCGTGAAGAGAACA	A. mellifera CDS
CCATCTGTATCGCGTTTTTCCACACGGTCCA	A. mellifera CDS
ATCAAAAGTACCTTCGAGAGTTACTTCTCCA	A. mellifera CDS
AATGAAACAGTGATCATTGTCGTTTATCTTG	A. mellifera CDS
AGGTAACAAAAGTTCTAATAATATTGTAACA	A. mellifera CDS
TATTCTCAAGACGAAAAAATAGAATATTTAA	A. mellifera CDS
AAATGATTTAGTAATAAAAATAGATAGTTTA	A. mellifera CDS
ATCGTTTCGCATTAACACTATTATAAACAAT	A. mellifera CDS
AACAGTATGAACAATTACTAGATACTACAAA	A. mellifera CDS
CGATGGAATGAAAAATAAGAAACAAGAAGAA	A. mellifera CDS
ACGATCTCCTTTCGAGAATCAAACGCCTAAT	A. mellifera CDS
AGCATGCCGCCTATTGCCCGGCTACCTGGCC	A. mellifera CDS
ATTTCTAACATGATTTTCGAACTTGACTGGC	A. mellifera CDS
AATTCTTCTTTTATGTGATCATAAATGTTAT	A. mellifera CDS
AATAAATCTGAAAAAATAGAACTTCAGCCAT	A. mellifera CDS
TCGATATAAGCAATTATTAGCTCGTTTCAAA	A. mellifera CDS
ATACTCAAAAATTTTGAATAAATTGAAGTTA	A. mellifera CDS
TCCCTTGAAGGAGTTTCTTATAAACAAACGC	A. mellifera CDS
TTTTTTGGATCGATCTCGATTCTCGAGGGTC	A. mellifera CDS
CCTCGAGGCTCGAATTAGCACGGCGAAGCGG	A. mellifera CDS
AATATTTACTTTACTTTAAGAAAAATCTTTA	A. mellifera CDS
ACCCTGTTCAAATAGCTTCGTTGCCCAATCC	A. mellifera CDS
CAAATGCCATAGAATTTGTTAATTATAATAA	A. mellifera CDS
CAAGGACAATTCGTGATAAATGAATTGCAAG	A. mellifera CDS
CAGGCGTTGAGCGACGCCCAATTTGTGGCGC	A. mellifera CDS
TGGATATTAGAAGAATATGAAAGAATGGTTC	A. mellifera CDS
ACGACAAAAATATTATGACAAAAGTACATGG	A. mellifera CDS
CCGGGTGATCTCGCGAAATCCGTAGTATCGA	A. mellifera CDS
CGGATGTGTCAGAATTCTTAAAGAAAAAATA	A. mellifera CDS
AATATGACCATACGAAAAATTATCCATTCGA	A. mellifera CDS
CACCTATGAGAAGACAAAATTCTCCTGTTAA	A. mellifera CDS
AAAGGAAGAAACTAGGAAATTTAAAAAATTA	A. mellifera CDS
ACACTTCAAAGAGACGTAATATTTTACAATG	A. mellifera CDS
CTTCCTACGAATCGGTATCAAATCTTACATA	A. mellifera CDS
ATAAAACAATGCGATGAAAAGGGCCTCCACG	A. mellifera CDS
ATTGAAAAAAGAGGAGGAACGTAAGAAACAA	A. mellifera CDS
TTTCGAAACACTCGTACGGAAGTGCACTGAC	A. mellifera CDS
ATGTGTATGCTAGTTTCTGCGATAATCTATG	A. mellifera CDS
CATAAACGAATATATTTTTCCTGTGGACGAG	A. mellifera CDS
AGTTGTATTCAATTATTTTTCGATAATTCTA	A. mellifera CDS
ACACATATAAGAACGTAATTATTGAAAAGAG	A. mellifera CDS
CCGTCTCGTTTTCTTCTTTTTCAACCTATGA	A. mellifera CDS
CTCTTTACTTCTCAAATAATGTGATTTTTGA	A. mellifera CDS
AGGGTGGTGATTTTGTAAATGGTGACGGTAC	A. mellifera CDS
ATAAATATAAATATAGTTATATTCCATTAAA	A. mellifera CDS
AACATTAATTTCGAATTTTGATTCAAATTAT	A. mellifera CDS
ATTGAAATTTTTTGGTTTTCTTTTACAAAAA	A. mellifera CDS
TCCAGCACCAGTTGGATCGATGCGGCGACAA	A. mellifera CDS
ACAAAAGAATATGCACAAAAATCAAAAGATA	A. mellifera CDS
ATCGTGTTGTTCGTATCGAGCAATTATAGGA	A. mellifera CDS
AATGAATGAATTCAATGAATATACAAGAAAT	A. mellifera CDS
TACATCGCGCATAGGGGAAAAAAACACTGGA	A. mellifera CDS
ATGCTTAAGATAACTAAATCCGTGTTCTATA	A. mellifera CDS
ACATACACTCTTTCATAATCCTAGAATAAAT	A. mellifera CDS
TTTACCACTCATTAAAGGTAAAGACATGTAC	A. mellifera CDS
ACCATGGGAAACAGTACAACTTACAGCATTA	A. mellifera CDS
AACCTTTGATATATCGATTATAGATTTAGAA	A. mellifera CDS
TGAATAAATAAAAGAAGTGATAGGCATTGCA	A. mellifera CDS
CTCCCGACCGAGAGAACGTGGCAAAAAGAGC	A. mellifera CDS
AAAATGGGGGGAAAAAAATAGCCGCGGAAGG	A. mellifera CDS
CAATGAATATTATTTCAAAAGAAAAAAAAGA	A. mellifera CDS
AAGGATTAAGGAGAAGCGTGGAGCGGTATCC	A. mellifera CDS
AAATAGGGACGAGTCTGATGATGATGTTATC	A. mellifera CDS
ACTGCAACATCCGCTGGTTGAAACGTTCCTC	A. mellifera CDS
ATGTAACAATCGCTGTAGATGGATCTCTATA	A. mellifera CDS
CGCATGTATATATTCGCTGCGAACGAGTTAC	A. mellifera CDS
TTTGTGGGACATGGATTATTGTTAGAAATTC	A. mellifera CDS
ATTTGATGAAAATTCTACTGAAGAAAATGAA	A. mellifera CDS
AGAAGAAGTCATGTTAGAAAGAGGTTTCATC	A. mellifera CDS
GAATTTTATTTACTTTAATTCTCTTTTGGTC	A. mellifera CDS
AAAATAAATTTAAAAAGTTTGAAATAAAAAC	A. mellifera CDS
ACTCAATATTGATAAATGTCTTTATTCAAAA	A. mellifera CDS
CGATTTTCCATTTCAATCATCATCGAACCAC	A. mellifera CDS
CAAACTGAAACAGATGGTATGGATATCGATA	A. mellifera CDS
CGACAAGCCGTGTATATGATATTGCAAGAAA	A. mellifera CDS
AAATATACTCTGTGATGCAAAAATTGCATTA	A. mellifera CDS
TAATAAGATCAGAGCAGCAATCTTGAAGTGA	A. mellifera CDS
AAGAATACACGATACACACAAAAAATTTAGA	A. mellifera CDS
AGAAGCATCGATCTACGCGGCTAGGCAAACG	A. mellifera CDS
AAGACAAAGCGTAGGCGTATCGTGTCGAATA	A. mellifera CDS
ATATAATTCTCTTTTACATCACAAACACACA	A. mellifera CDS
TTTGAAGGAGAAGTTACAGAATTAACTCCAA	A. mellifera CDS
CTTAATATTTACAGCGATAAATTGTTCAAAG	A. mellifera CDS
AATATTAAATAATATTGAGAAAAAATATTCA	A. mellifera CDS
AAGAGTTCGACCGTTTACCTGAACGCGGAGG	A. mellifera CDS
TAAAATACGAGAGCGCGTTTCATATCTCGTA	A. mellifera CDS
ATTTGTACAAGGTATATCGGAAGATGGAGCA	A. mellifera CDS
ATTGCGACGAACGATGCTAGTGACATTTGTG	A. mellifera CDS
AGAAATAGCCGGGGCAAATCAAACGATAGAA	A. mellifera CDS
ATAATTACCATTCATTCAATTTCATAATTAT	A. mellifera CDS
TCCACTTCATCTCCTGGTAATTGTACATAAC	A. mellifera CDS
AAATTCGTGCGTGAAAGTATTAAAGTAGTGA	A. mellifera CDS
AGAGCGGAGCCCCGAGAGATTTACGATAACG	A. mellifera CDS
AAATGATAACAGGAAAAAATGAATCAGAATT	A. mellifera CDS
ATAATATTAATGATCAGCATATTGATGAAAT	A. mellifera CDS
TAGTTAACATACTTTACAAACATCAACTAAC	A. mellifera CDS
AAAACAATAAAATCTGATATTTAGTCGCATA	A. mellifera CDS
AACCGTTCCAAGCACCAGTCGACTGTCTCAA	A. mellifera CDS
AGAAAAAAGAATGATCGAAATCTTTATTTAA	A. mellifera CDS
ATAGAGCTTTAAATGCACAAGTGCTTTATTA	A. mellifera CDS
ACAAGGAGCGATCGCGATACGATTTGACTAT	A. mellifera CDS
AATTATTAAATAAATTTGAAATACCAAATAT	A. mellifera CDS
TCCTCGTTTCCTCCTCATCCGATTGCACCGA	A. mellifera CDS
ATACAGTGCGATTGGATTACAAACCATGAAG	A. mellifera CDS
AACATGGCGGATGTACAATTACGTGCATTGT	A. mellifera CDS
AAAAATAGATCAGCATGTCCTAAGAACAACT	A. mellifera CDS
CGAATATTTATCTCGATTATTCTCGTTGCAA	A. mellifera CDS
CCCTCTTTTTTCCACGCGTTTTTCCCTCGGC	A. mellifera CDS
AATGTGTTAAAGCAATATTTGGTAAAAAAAT	A. mellifera CDS
AAAACCGTCTCAGGTGTAAATGGACCATTGG	A. mellifera CDS
ATTAAATCATTATATTTATTTTATTTTATTC	A. mellifera CDS
ATAGAATTTTTAGCTTCGAATAAAGAGCTTG	A. mellifera CDS
ACGGGAAAAACGGGCAACCGCCGCCTGTCGC	A. mellifera CDS
CCACGCTTAGCGATAGTGACTAGTATGAGTA	A. mellifera CDS
ATCGGAGGACTGGACGGTCATGGCGGCAGCG	A. mellifera CDS
ACTAAAATTCATTTTTCTTGAAAATTATCGA	A. mellifera CDS
ATAGCTCTTGCAAAAAAAATGTCATTCCTCA	A. mellifera CDS
AACAAAAACCAAACTTTAAACTTAATTCATT	A. mellifera CDS
TAAGTGTAAATGTAATTACACGTATGCGCGA	A. mellifera CDS
AACATAATAATTACGGGCACAGCATCAGGAT	A. mellifera CDS
ACGAATAATGCAACGAGAGAAAATTCGACGA	A. mellifera CDS
CTGCTGCTGTTCTACCTACCAATGAGCCCAG	A. mellifera CDS
TGGCATGTTACTTTATTGTAAAGAAGCATGC	A. mellifera CDS
AAGTTTAATGGATGCGGAGGTACGAAGAATA	A. mellifera CDS
AACAGTAAGCATCACTGTGGTTGTCAGTGAT	A. mellifera CDS
CAGCTTGGAATAGATATGCATTTAATGATGA	A. mellifera CDS
TATTTCTCTAATTTTGTATATAAAATGAATC	A. mellifera CDS
AAATTACAAAAAATAGATATGCCGATATTCT	A. mellifera CDS
CCATTTAACCGCTTTCAAACCACTTATTTCC	A. mellifera CDS
AAACCAGTTAAGGTCGAACTCTTGAGACTAT	A. mellifera CDS
CAAAATTCGATTCGATGTGAAACGTGACAGG	A. mellifera CDS
TTAATTAAAATACTCGGAATGCGAGATAAAA	A. mellifera CDS
AAGTATCGAGCGTTAACAGTGTTCTTCCTGG	A. mellifera CDS
CGTTACCTTTGTAGTAAAAAAACAATACGTA	A. mellifera CDS
ACGTTGTATTCGAGTTGTCTTTCACAGGCTA	A. mellifera CDS
AACGAAATGTATTGAACCAGTAGATGTCCTC	A. mellifera CDS
ACTGGTTACTTAAAAACGTGGAGCGGCTCGT	A. mellifera CDS
ATAGACCCCAAGCAGAAGCCATGTGGGAAAA	A. mellifera CDS
CGAGATAAGTGTCAATAGTGGAGGAACAATA	A. mellifera CDS
AAAAGAATAAAAGAAAGAAAGAAAGAAAGAA	A. mellifera CDS
ATTTTTACTACTACTCCCGAAAGTGAACGGA	A. mellifera CDS
TGGGAGTAGTTACGTCCCTTATTGCAGCAGC	A. mellifera CDS
TTTATCGAAATAATTGAGCAGAGGAACAAGC	A. mellifera CDS
AAATTCGAATTTTTATACGCGGAGAAAAATG	A. mellifera CDS
TGGTGCTGATATTAATATGATACGTTCTTTC	A. mellifera CDS
AACCTTGGATTATTGTCTCAGTGGAGATACT	A. mellifera CDS
TTTCAGGAAATTGTTATAATCAGAAATCAAC	A. mellifera CDS
TTCTGCTGGTAGATACCGACTTGTCGATGGC	A. mellifera CDS
TCCCGGCCACTTTTCTCAGATGCCGCTATTC	A. mellifera CDS
TTCCGATACTTAAGTGCAACGCCCTTTTGCC	A. mellifera CDS
AAAAACGGAAAAGAAATTTACTTTGACAAAA	A. mellifera CDS
CCGAGGATGGAGCAACAATGCCTAGTGAATC	A. mellifera CDS
AAATATTATCAGGTAAACGTATTTACTCTTT	A. mellifera CDS
CCAAGCCTCGGATTCTCGAAACCGATCGACC	A. mellifera CDS
CCTGCTACAGGTGTAGGTGCTAAAGTTGGTA	A. mellifera CDS
CAGGATGGTAAAGATTTAATCGAGGAATGGA	A. mellifera CDS
TCACCGCGTTTCAAGGGACGGCCAATCTCCA	A. mellifera CDS
AAAGGAGAATAGTGGATGCAACTACGTATTA	A. mellifera CDS
AAAAATCATATTTCACCACTTCAAATAATTT	A. mellifera CDS
TTAATGATGCTGAATCAGTTGTATCTTACAC	A. mellifera CDS
TAAATTATTAAAGGATATCAAGTGGTACTGC	A. mellifera CDS
ATGTGATCTTTGTCATAAATCATATTCCACT	A. mellifera CDS
TTCCTTTAACATCACAAGGAAATATTTATTC	A. mellifera CDS
TCCATAATTGTTCGAGAAAGGACAAGAATTC	A. mellifera CDS
AACAGATACAAAAAGAGATGCAACTTTTGAA	A. mellifera CDS
AAAGTGGAAACGACTAGAACGTTCGACGCCG	A. mellifera CDS
AGAAAGCGTGGCTCGATATTAATAAACGGAG	A. mellifera CDS
ACGCGGACAGAAGGGAATTGGGAAGGAAGCA	A. mellifera CDS
TCATTTTTCAATGAAAGTTTGTGAAAAGGTC	A. mellifera CDS
CACACATTCTTAAGGCCAGGAGTTTGAAAAG	A. mellifera CDS
CTTTATCGATCGATCAGTTTTTGAAATTGTA	A. mellifera CDS
TCAAGAATCTTGCGTTCTACTATTTTTATAA	A. mellifera CDS
CTATCGTGAAATTGTATTAAATACAATTCAA	A. mellifera CDS
CTAGACAAAAAAGAAATATTGCTTATAATCA	A. mellifera CDS
ACTGAAAGCCGAAATCGCGATAAACGTGCAC	A. mellifera CDS
CATGTTCATGTTCTGGAGCAAACGGACGGCG	A. mellifera CDS
AAATTAGAATTAAAATGGTTCGCAGTTCCTG	A. mellifera CDS
ATATCTATGGAACAAAGCAAATATGCGCCTA	A. mellifera CDS
TTTTAAGAAAAAATAGAGAAGATCCATTTCC	A. mellifera CDS
AGTAACAAGGCATCTGTGAACAATTCTGATC	A. mellifera CDS
AAATAATGAACATACTGAAAATAATAATGGT	A. mellifera CDS
AACTAATATTCCTTTAACTACATGTACATAT	A. mellifera CDS
ATCGATATCGTATTTCCTTTGTACTTGTTTC	A. mellifera CDS
CGATAACTGAATTAATTACATGTATCACGTA	A. mellifera CDS
ATAACCAAACCTGAATTACAAAATTTTAAAA	A. mellifera CDS
AGTTATTTCAATGCTGTGAACGTTTTATTTA	A. mellifera CDS
AAAGATCAAATATCTGTGCATTATGACCCAT	A. mellifera CDS
CAGAAGCGGCCTATTGCAATAACGCTGCATC	A. mellifera CDS
TTCTTCGAAATCCGATTCGATGGGCAGAATC	A. mellifera CDS
ATTTGAATGGTGGATATTTAGTTTAGAGGTG	A. mellifera CDS
ATTCTGATGGAAAATGAAAATTTTCTTTACT	A. mellifera CDS
AAGAGAAAAATCAAATGAATCGAACGAATAT	A. mellifera CDS
AAAAATTGGCGGATCGAGTGTATATGATTCG	A. mellifera CDS
TATAATATAAATGGATATACTTGCCAACAAA	A. mellifera CDS
CCAGAATCAGCACAACACATTAAAACCTTAA	A. mellifera CDS
AACCAACATCTGAAGTAAAAGCATCAAAGGA	A. mellifera CDS
AACAATTCTTATTCTAATATGAATAGCAAGT	A. mellifera CDS
TTTCTATCATTCTTTTTCTTCATATTTTAAC	A. mellifera CDS
ATTGAGGACGAGGAGGAAGGAAGGAAATGAG	A. mellifera CDS
ACACTTCAAGTACAGAAGTCGTGGCCGGCAA	A. mellifera CDS
CTGTGAATTTCGACTTAAAATAGCGATGACG	A. mellifera CDS
AAATGCTATTTGGTCAAGCTCTATGAAAACC	A. mellifera CDS
AAAATAAGTAGTAAAGAAATTGACTTATTAA	A. mellifera CDS
CTCTCTATAGTTAGAGAAATGGTTACTATCA	A. mellifera CDS
ACCCACTGCACCTAGGCCAGTCGTCCAAGTG	A. mellifera CDS
CACATATCTAGTCAACTATTAATGAATTGTA	A. mellifera CDS
ATCTCAATTAATTATCAATTATGATTATAAG	A. mellifera CDS
AAAAATATAAAACCTGGTGAAAGTTTGAAAT	A. mellifera CDS
TCCATTTTACAAAGGAGTCCTTTAAGTTAAA	A. mellifera CDS
AAGAGTAAGTATAAATGTAATGCACATAATG	A. mellifera CDS
TTCTTCTACATGCGAAAGATTTTCTGGAACA	A. mellifera CDS
AAAAACGTTGCTCCTTTGAAAGGATTACGAT	A. mellifera CDS
AAATACTGATGGAAAACGACGAGAAATGTGG	A. mellifera CDS
TTTTTAACTCGCGGCGATTTATATCGAGCAA	A. mellifera CDS
GCAGGTTTTATTTTCACAACTTCATTACCAC	A. mellifera CDS
AAATTAGTTGTAATGGGATTTAAAAGTGCGA	A. mellifera CDS
ATTAGGAATTTTTTTTTGAAGGTGTTCATAA	A. mellifera CDS
ATTGGTTCGCATTTAGAAGATCAAAGTAAAA	A. mellifera CDS
CGCGAGTATTATTTGTACCGGCTGTGATCGC	A. mellifera CDS
ATCAGATTTTGCAACAACAATTGTTAATTAA	A. mellifera CDS
CGCGGAACATCCGACGACAGCCCGGATTACA	A. mellifera CDS
ACAGTGGGGAGAGGCTACGTGTTGTACACGT	A. mellifera CDS
TCCTGAAGTGCCAAAAGAAATACAACTTGAA	A. mellifera CDS
TAGAATTTTTAAATATTGCTCAAGAAGAAGA	A. mellifera CDS
CCTTCACCGCCACGTGTTCGACAATCTGACC	A. mellifera CDS
CATATGAATAATATATCAAGTATACTATAAG	A. mellifera CDS
TGCCTGAAACTACAACACCAAGTCCAATTCC	A. mellifera CDS
TCTCCTCGATTCTTTTCGTAAAAAAAGGAAA	A. mellifera CDS
ATCTGGCGGCTGTTAGCTACGCCAACTCTGA	A. mellifera CDS
AGCGTGATATCGCCGAATCGAATAAGAATAA	A. mellifera CDS
AAATTGTTGAAACCGGTGGGCGTGCTTTACG	A. mellifera CDS
TCTCACCGTGTTTGGGTACTGCGTGGCGAGA	A. mellifera CDS
AATATTAATTATAAATACGGATAAAATTAAG	A. mellifera CDS
ATGGAAAGTCAATATTCTCAGACGACCATTA	A. mellifera CDS
AATTCGTGCACGGGAAAGAACCAGAGAAAGA	A. mellifera CDS
AGAAATGCGTCGTTGTTCTGTTAATAAAATG	A. mellifera CDS
TACCTCAATTTGCAATGCAACATATTGAACC	A. mellifera CDS
ATAAAAGCGATGGTTGTCTTAACGTATATAT	A. mellifera CDS
TAATGTTTTCTTGTTCTCGTATGCTCGCAAC	A. mellifera CDS
TAAACGAGGAGGGAGGCTGTGATTCAAACAA	A. mellifera CDS
TGTAAGCATCCTTTCCATTTGTCTACTATAC	A. mellifera CDS
TACACCAGGAAAAGTATTTAGCGTAGGATCA	A. mellifera CDS
CACATAAAGGTAAAAGAAAAATATTTCGGCA	A. mellifera CDS
TTACACGATAACAATAATCTTAACAAAGAAA	A. mellifera CDS
ACGAATTTTGTTACTCGATATTATTTATAAT	A. mellifera CDS
CATTAGAATATACTCTCCGTTTAACAGCGTA	A. mellifera CDS
CATTGCATCAGCCTGATTCCCCTAGTTTGAA	A. mellifera CDS
ACGCGGAATGCACTTGGGAAATAACTGCGGA	A. mellifera CDS
TTACCTTATGAGGAAAAAATTGTTTCTGCAC	A. mellifera CDS
ATGATGTATAACTTCATTCATTGCATTATTA	A. mellifera CDS
ATAATTCGTCAGCTTGTTTCAAGAGTTACAA	A. mellifera CDS
ACGGCGATGATCTTGGATACATTTTCAAGGA	A. mellifera CDS
AGGTCTTACGTGGGTCTTCTAAGGTTAGAAG	A. mellifera CDS
CGGAAAAGCTGATCAATTACTGTCCAACTGC	A. mellifera CDS
CTTTTACAAATAAAAGATCGCCACAATGGTA	A. mellifera CDS
ATCGAAATTCGTTCCCCGAGCAAGGGGATAA	A. mellifera CDS
AACCCAGTCGAAGAGAAAAAGAGCCGGAGAG	A. mellifera CDS
TTTAACTGGTACAACAACGTTGATGATTAAC	A. mellifera CDS
TTACCTTGTGGTGTAACTCGCACAACATATC	A. mellifera CDS
CATTGTTCAAGTTTATAAATGAATGATGACA	A. mellifera CDS
AAATTTATTTTTGAAAGGAATTGAATATGAG	A. mellifera CDS
ATAATGCCAAATTCATACATACACCCTTGTA	A. mellifera CDS
ATAAGGGAGAATTATTAACGACAAAAGATTC	A. mellifera CDS
ACTTCGGTTCAAAAAATCTCAACCTTACCCG	A. mellifera CDS
TGCCGTTCCTATGTTACCGCATATGCCATAC	A. mellifera CDS
GATTCTGCGAAACAGTCTCTGTAACGAAGAC	A. mellifera CDS
TATTAAAAAAAAATAATATATATATATATAC	A. mellifera CDS
ATCAATATTGACAGGCTACAGAACTATCGCC	A. mellifera CDS
AGAGGAAAATCCTTCAATACATGGAATATTC	A. mellifera CDS
ACGGTCCGTCTTGGGGATTACAATATCAAAA	A. mellifera CDS
AAACAGCAACTAATAAAACTGGAGAATATGA	A. mellifera CDS
CAAGAAGAGAACAATTACCAAGTATAGTACC	A. mellifera CDS
CCTAAAGCTGTAAAAGGCACTGTACAACAGC	A. mellifera CDS
ACCGCAACGATTCCTCGATGCAAATGGCCGA	A. mellifera CDS
AGTGTACACTAATATCAGGGCAAGCGCACCG	A. mellifera CDS
ACCTGTGGAAGCAATAAACATCCGGATATGG	A. mellifera CDS
CGACAACAATCGGTGTGTCCAACCGATGCAA	A. mellifera CDS
AAAAATTTTGCAAAAAATCTTGATATAGAAG	A. mellifera CDS
CATTATTTCAACGCGCCTGCCTTTGCCAATG	A. mellifera CDS
AGAATTTGATCGAAGAGAGTATGAAGACAAA	A. mellifera CDS
TAACGGCAAGAGATACAAAAGTACGTACCAA	A. mellifera CDS
AACGACTTTTGATCGTTTCCAATATCCAGTA	A. mellifera CDS
AACGTAACATCAAATAAATTAAAATACCGGG	A. mellifera CDS
CAAAAGAAAAATCATCTTGTCATGTTTTATG	A. mellifera CDS
CGCTATAGTTCACGTTTATGGTCCTTTTAAC	A. mellifera CDS
CGCTAATTTTTAATTTTTATTCCATTTTATC	A. mellifera CDS
CGTAACACGAAATATATTGTCGTAAATATGC	A. mellifera CDS
TTGAGAACAGAATCGAAGTATCTAGTTCATC	A. mellifera CDS
AACCATTAAGAGAATCTATTAAAAATCTTAA	A. mellifera CDS
AAAATTTATTAAGGAATTACAAGAAGATTGT	A. mellifera CDS
AAATCAGAGAAGAACATATTTTGAATGGTGC	A. mellifera CDS
ACAAATTCTTCGATTTCCATATCTTTAACCG	A. mellifera CDS
TAGACAATTAAAAACAGCGGTAAAAAGTAAC	A. mellifera CDS
ACGGTCACTTTCAACGACGGGTTCTTCGTTC	A. mellifera CDS
ATGAAGCGCCCGTATTATATTGCCGGATGCA	A. mellifera CDS
CATTTACAAAACAAACGGCCCTTTTCAGGGC	A. mellifera CDS
ACACCGGCGTCTGTCAATCATCTGAGCAATA	A. mellifera CDS
AAGTACAACAGCAGGTACAACAACAACAGCA	A. mellifera CDS
CGGGAATTAGGAGGATCCTCTCTAGTTTTCA	A. mellifera CDS
TAATATTAATGTTGATCTATGATTACATATC	A. mellifera CDS
ACGTGGCCGCTCCGCAATCCTCACCGTCTTC	A. mellifera CDS
TGTGTCCGTGCCCAGTTTGAACAATGGAGTC	A. mellifera CDS
AGAAAGAAGAAAATCATCTTTAAAAGTTTTG	A. mellifera CDS
CTCTTCATATCTTCTTGGCTCCTTTCTTCAC	A. mellifera CDS
AATAAATTGGATGCATTAATGGAGGCAAATG	A. mellifera CDS
TCAGAGAGCGGAAGAATACCTGGAACGTCTC	A. mellifera CDS
AAATTAATTTTTTCTATGGAATATATCCTGA	A. mellifera CDS
CTCTTCACTAGCATACAGTGGCCAACCCCTA	A. mellifera CDS
CATTAGGAAACGCGCTACGTGGAAGTTTCGA	A. mellifera CDS
CTTTCAAATCATCATGTTGACAAAAAGAAAC	A. mellifera CDS
TAGTAAACATTATATCAAAAATTAATCTACA	A. mellifera CDS
TATATCAAGATTGTACCTACAACCTATGTTC	A. mellifera CDS
ACAGAGAGAGCGATGCACATGTGCAGGGACA	A. mellifera CDS
TCTAAATATGGAATATAAAAATTATATAAAA	A. mellifera CDS
CAAGAGGGAAAAAAGTCTCTCTGGTCACAGC	A. mellifera CDS
TTAGAACGTTTGTCCTTGAAAAACAACAGAA	A. mellifera CDS
CATTCCGGCCGATAAAAAGCAGAAGATCGCC	A. mellifera CDS
GAACACATGAAAATCATTTACTAAATAATAC	A. mellifera CDS
GGAAGAGCTCTTGGAGATTTAAGTCCTGTCC	A. mellifera CDS
CGCTGAGTGGATCCGCCTTACCAAGGGTACC	A. mellifera CDS
AAATATAGAACATGAATTAGCTAATGGTTAT	A. mellifera CDS
AAGCAAAAGAAATTTCTACACACCCATACAC	A. mellifera CDS
ATTCAATCAGTTAATTAATCCTTTCAATGGA	A. mellifera CDS
AGTTAAATTGGAAGTGCCTACAAGAAGTGAA	A. mellifera CDS
AATCGTATAAATGAAGTGGGAGTAGATTTAA	A. mellifera CDS
TCCGCTCGAAAAAATAAAGAGACTCGGGCTC	A. mellifera CDS
AACTACGCCATTGCGCTCATATTAACCAATG	A. mellifera CDS
AAAATCTTACTAAGCCCTATAAGCCTTAACG	A. mellifera CDS
ATTCGACTCGATTTATACGACTTCTTAGCCA	A. mellifera CDS
ACAACATATTTTTTTAAATAAATTTTATGGA	A. mellifera CDS
CAACGTGTAACAATTGCTTATATATAATATA	A. mellifera CDS
ATGGTAAAAAGGTCTATGTTTATTCGAGTGG	A. mellifera CDS
ATGATTTCATTAGTAAAGTAACAGTAAGATC	A. mellifera CDS
ATCAACATATTGGGGAAAATTTGTATTCGTA	A. mellifera CDS
CTCCTCTCCTCTTTCTTCAATTCTTCAACAA	A. mellifera CDS
AAAAGGAGACGAATTCCGTTTTCGCGTAATT	A. mellifera CDS
ATGGTAGAACGACAACGGAAAGAAGAATGGG	A. mellifera CDS
ATATTCATTGATAATTTTTCAAAAATTATGA	A. mellifera CDS
AAAAATGGAAATCAATTATACAACAAAAAAC	A. mellifera CDS
TACTCCTAATTTACGGCGATATCCTATGCCA	A. mellifera CDS
CAACTATAAGTGATCATGGATCTCATGGCTA	A. mellifera CDS
AAAAAAAGAATAGTAGAAGGTGGAGTACAAA	A. mellifera CDS
TCAAGCCAGCTTTTGCCCTTTTGCTCTACGC	A. mellifera CDS
AAACTGAAATCTCTTATTTCAAAACTGCATG	A. mellifera CDS
AGCGCTAGGCAGGTAGCTAAACAGCTGGACG	A. mellifera CDS
[truncated: 2,708 more rows]
