# Supplementary material for: Data mining reveals tissue-specific expression and host lineage-associated forms of Apis mellifera filamentous virus
Source: PeerJ. 2023 Nov 14;11:e16455. doi: 10.7717/peerj.16455 (PMC10655722; doi:10.7717/peerj.16455)
Supplement: Supplemental Information 17 [file peerj-11-16455-s017.xlsx]

## Sheet: Sheet1
Supplemental File S6. Characteristics of tandem repeats identified with Tandem Repeats Finder (Benson G. 1999. Tandem repeats finder: a program to analyze DNA sequences. Nucleic acids research 27:573-80. DOI: 10.1093/nar/27.2.573). The repeat periods searched for were in the range 8-20. A minimum threshold score of 100 was required. Any use of trade, firm, or product names is for descriptive purp…
start	stop	period	copy#	Consensus	%matches	%indels	score	a	c	g	t	Entropy
1055	1173	12	10.4	12	78	10	115	1	7	39	51	1.4
2527	2765	12	19.9	12	84	3	275	0	28	24	46	1.56
2780	2856	12	6.4	12	86	0	109	9	10	32	48	1.69
4878	4989	12	9.3	12	96	0	197	0	19	24	55	1.43
6598	6680	10	8.4	10	93	2	141	20	28	30	20	1.98
9497	9572	9	8.3	9	89	2	107	27	9	38	25	1.86
9931	10020	17	5.2	17	97	1	153	23	5	21	50	1.7
13189	13240	18	2.9	18	100	0	104	11	21	32	34	1.89
15856	15934	10	8	10	87	2	106	11	24	21	43	1.85
17269	17435	12	14.3	12	83	9	204	0	14	24	59	1.39
18271	18333	15	4.2	15	95	0	117	12	14	14	58	1.63
19817	19930	12	9.5	12	82	7	106	9	15	35	38	1.81
30269	30367	16	6.2	16	91	0	144	14	13	21	51	1.75
31085	31260	18	9.8	18	76	2	129	7	26	18	47	1.75
31639	31704	12	5.5	12	96	0	123	40	13	18	27	1.88
38906	38999	12	7.8	12	92	0	125	8	3	35	53	1.48
40889	40956	17	3.9	17	86	1	100	13	16	23	47	1.81
41231	41289	20	3	20	100	0	118	30	18	15	35	1.92
41969	42064	18	5.3	18	85	5	104	7	18	44	29	1.77
44000	44081	12	6.8	12	86	5	112	14	31	19	34	1.92
48442	48562	18	6.7	18	84	0	152	38	23	25	12	1.9
48442	48562	9	13.4	9	84	3	136	38	23	25	12	1.9
52616	52679	18	3.6	18	91	0	101	0	25	46	28	1.53
53845	53967	12	10.2	12	79	0	102	11	19	26	43	1.85
58952	59021	12	6	12	90	6	108	27	24	8	40	1.84
59218	59348	12	11.2	12	86	4	142	36	34	25	3	1.74
63128	63259	18	7.3	18	93	0	210	0	9	48	42	1.35
64360	64456	11	8.9	11	80	6	108	11	15	18	54	1.7
67801	67892	13	7.1	13	91	0	148	30	16	30	22	1.96
69624	69748	12	10.9	12	89	10	199	35	17	31	16	1.92
76449	76522	12	6.2	12	90	0	112	39	17	8	35	1.79
79714	79834	18	6.7	18	92	1	147	16	11	28	43	1.83
84755	84928	12	15.2	12	80	11	132	37	25	24	12	1.9
85065	85121	11	5.2	11	100	0	114	8	8	35	47	1.66
88157	88247	18	5.1	18	95	0	155	2	14	21	61	1.43
88161	88247	9	9.7	9	89	0	111	2	14	21	60	1.45
88595	88704	13	8.5	13	91	0	184	16	21	17	44	1.86
91542	91760	12	18.4	12	88	1	307	16	7	36	38	1.77
93247	93354	10	10.8	10	79	4	110	37	15	15	31	1.9
93257	93354	20	4.9	20	94	0	169	36	14	16	32	1.89
95996	96067	9	8	9	98	0	126	44	41	11	2	1.54
97862	97965	9	11.6	9	91	0	172	11	48	22	18	1.8
103759	103927	13	12.5	14	94	2	269	0	27	14	57	1.42
104222	104275	12	4.5	12	100	0	108	9	33	40	16	1.8
106266	106327	9	6.9	9	96	0	115	0	9	43	46	1.36
115378	115457	11	7.3	11	95	0	142	10	18	25	46	1.8
115999	116127	12	10.8	12	83	12	167	8	30	41	19	1.81
121639	121762	12	10.6	12	83	10	111	0	37	36	25	1.57
122281	122360	15	5.3	15	93	0	133	17	13	42	26	1.86
124674	124795	11	11.1	11	92	3	192	9	21	35	34	1.85
127711	127771	12	5.1	12	91	0	104	3	31	32	32	1.74
128362	128429	18	3.8	18	92	0	100	10	26	23	39	1.87
128374	128429	9	6.2	9	97	0	103	10	25	21	42	1.85
130194	130281	9	9.8	9	94	0	140	37	44	18	0	1.5
132085	132148	12	5.3	12	96	0	110	9	43	21	25	1.82
134824	134938	11	10.5	11	99	0	221	0	26	35	37	1.57
135392	135549	15	10.5	15	89	2	219	0	27	20	51	1.48
135693	135756	9	7.1	9	94	0	110	9	32	23	34	1.87
136852	136978	12	10.6	12	83	6	150	30	15	25	27	1.96
143386	143515	12	10.8	12	79	9	140	13	28	20	36	1.91
146654	146904	15	16.9	15	92	4	348	0	26	48	25	1.52
148511	148571	9	6.8	9	96	0	113	22	22	19	34	1.97
151729	151821	12	7.8	12	85	0	132	41	22	24	10	1.85
154709	154811	13	7.9	13	96	0	179	32	29	22	16	1.96
154937	155056	10	12	10	84	5	127	20	22	28	29	1.98
158764	158941	12	15.2	12	76	5	159	8	29	25	36	1.85
159286	159421	11	12.5	11	92	1	202	8	38	21	31	1.84
163381	163571	13	14.1	13	84	8	256	41	21	19	16	1.9
166348	166426	12	6.6	12	91	0	104	37	36	12	12	1.82
168059	168115	12	4.8	12	97	0	105	22	50	10	15	1.74
169730	169878	17	8.8	17	81	8	151	22	21	20	34	1.96
171072	171129	12	4.8	12	100	0	116	34	43	6	15	1.74
174885	174952	12	5.7	12	94	0	118	33	41	25	0	1.56
181532	181664	12	11.1	12	91	2	187	17	8	36	37	1.8
182039	182144	18	5.9	18	96	0	176	10	32	33	23	1.89
187336	187424	18	5.1	18	88	8	114	12	16	11	59	1.61
187772	187923	16	9.6	16	94	1	234	38	13	22	25	1.91
192756	192974	11	19.7	11	80	6	165	28	33	10	27	1.91
194800	194894	14	6.9	14	93	2	102	27	32	18	21	1.97
194827	194901	14	5.4	14	95	0	114	28	30	16	25	1.96
198148	198241	8	11.9	8	88	2	145	37	35	14	12	1.85
199874	199979	15	7.1	15	83	4	115	46	14	20	18	1.84
208621	208679	12	4.9	12	100	0	118	23	42	16	16	1.89
212881	212969	10	8.9	10	85	4	108	24	34	20	20	1.96
216629	216678	18	2.8	18	100	0	100	22	34	34	10	1.87
216982	217044	12	5.2	12	100	0	126	17	42	15	23	1.88
218294	218356	9	7	9	96	0	117	33	20	22	23	1.97
222055	222271	12	18.6	12	78	11	229	8	24	36	29	1.85
225115	225240	13	9.7	13	90	0	189	14	30	10	45	1.78
230620	230750	12	10.9	12	86	0	181	38	22	28	9	1.86
231319	231485	12	14	12	81	3	176	61	22	9	6	1.5
231687	231800	9	12.7	9	78	3	122	54	21	21	2	1.57
235135	235199	9	7.2	9	96	0	121	21	55	23	0	1.44
235994	236081	18	4.9	18	85	0	104	23	32	25	18	1.97
250363	250474	14	8.1	14	79	11	124	41	8	25	24	1.82
250799	250898	19	5.2	20	91	3	161	13	24	5	58	1.55
252103	252223	12	10.1	12	89	0	188	29	44	8	17	1.78
253660	253784	11	11.5	11	86	3	173	10	25	33	30	1.89
260420	260502	10	8.3	10	95	0	148	20	28	38	12	1.88
265128	265203	13	5.7	13	93	3	125	17	9	28	44	1.79
266106	266181	15	5.1	15	96	3	145	28	19	31	19	1.97
269112	269453	14	23.9	14	75	9	296	22	23	37	16	1.94
276022	276257	11	22.3	11	86	6	301	52	16	9	21	1.71
277321	277397	14	5.6	14	90	3	111	28	36	12	22	1.91
279039	279154	18	6.4	18	91	0	133	40	27	14	17	1.88
281334	281408	15	5	15	98	0	141	48	32	6	13	1.68
284341	284395	16	3.4	16	97	0	101	12	34	30	21	1.91
284445	284545	11	9.2	11	97	0	184	27	36	19	15	1.93
286792	286883	11	8.4	11	84	4	123	41	26	21	10	1.86
291324	291429	12	8.8	12	94	0	185	7	24	2	65	1.33
292889	292984	11	8.9	11	81	4	106	39	25	16	18	1.91
300976	301104	12	10.6	12	85	6	143	53	34	10	1	1.45
303024	303108	18	4.7	18	89	0	134	12	36	20	30	1.9
303024	303108	9	9.4	9	82	0	107	12	36	20	30	1.9
303459	303688	9	26.6	9	80	7	244	13	15	37	33	1.86
310149	310409	20	13.3	19	73	14	140	78	10	4	5	1.06
310149	310409	8	30.8	8	70	16	102	78	10	4	5	1.06
310257	310417	19	8.1	19	79	14	139	81	7	6	4	0.96
312598	312752	12	13.6	12	78	9	110	29	19	10	40	1.86
314226	314299	9	8.2	9	92	0	112	35	32	21	10	1.88
314919	315013	12	7.9	12	93	0	136	14	31	26	27	1.95
320247	320393	13	11.1	13	91	4	231	38	23	28	9	1.86
322633	322727	17	5.6	17	97	2	174	58	22	0	18	1.39
322750	322845	20	4.8	20	92	2	149	56	11	5	27	1.56
322750	322845	10	9.6	10	85	3	131	56	11	5	27	1.56
324871	324949	14	5.6	14	90	0	122	40	13	45	0	1.44
326326	326509	20	9.1	20	85	4	196	42	27	27	2	1.67
329425	329632	8	26.6	8	77	7	187	53	32	12	1	1.49
330885	330968	15	5.6	15	91	2	134	27	26	26	20	1.99
331092	331189	18	5.4	18	100	0	196	22	17	43	16	1.87
333244	333350	12	8.9	12	93	2	171	57	25	17	0	1.41
335827	335932	12	8.8	12	91	0	140	37	30	11	20	1.88
341166	341227	10	6.2	10	94	0	106	41	38	8	11	1.7
341415	341483	13	5.3	13	100	0	138	40	21	21	15	1.91
342624	342739	20	5.7	20	90	4	151	33	28	31	6	1.81
342662	342779	11	11.3	11	76	10	122	29	31	32	6	1.83
349821	350120	18	17.3	18	74	18	210	37	31	30	0	1.61
352831	352891	15	4.1	15	97	0	113	19	34	24	21	1.96
353070	353144	18	4.2	18	98	0	132	28	22	36	13	1.92
357712	357957	8	32.5	8	78	10	259	8	24	40	26	1.84
358231	358289	19	3.1	19	92	0	100	38	47	11	1	1.5
359699	359766	12	5.7	12	100	0	136	7	32	26	33	1.84
361004	361092	12	7.4	12	89	0	142	15	30	35	17	1.92
364239	364299	11	5.5	11	100	0	122	36	45	18	0	1.49
366686	366964	14	21.1	14	70	20	194	23	24	45	6	1.77
370836	370904	18	3.8	18	88	0	102	21	18	11	47	1.8
375074	375227	14	11.2	14	88	4	215	33	18	16	31	1.94
379284	379398	20	5.6	20	81	6	122	54	33	0	11	1.36
379285	379398	15	7.7	15	79	7	117	55	33	0	11	1.36
379494	379660	11	15.2	11	94	0	298	37	26	34	1	1.65
380729	380849	9	11.9	9	77	22	116	6	23	28	40	1.8
386158	386318	18	8.9	18	87	1	214	8	37	23	31	1.84
394366	394461	13	7.4	13	93	0	165	10	20	20	47	1.79
405833	405927	12	7.9	12	93	0	154	15	41	25	17	1.89
408916	409107	15	13.3	15	85	4	166	20	12	18	48	1.8
411335	411529	16	12	16	92	5	313	1	30	26	42	1.62
416567	416657	13	7	13	93	5	157	45	14	31	8	1.75
417037	417113	18	4.3	18	98	0	145	44	3	23	28	1.71
417037	417113	9	8.6	9	92	0	127	44	3	23	28	1.71
418059	418133	15	5.1	15	93	6	136	20	20	26	33	1.97
421605	421678	11	6.7	11	93	0	103	18	33	27	20	1.96
422986	423242	12	21.7	12	79	2	286	39	19	24	15	1.91
424171	424373	11	18.7	11	73	3	133	31	27	31	9	1.88
424504	424609	12	9	12	95	4	198	33	23	42	0	1.55
426088	426161	12	6	12	92	6	121	8	16	39	36	1.78
433261	433418	15	10.5	15	88	0	235	10	12	29	48	1.74
434130	434193	11	5.8	11	92	0	110	39	17	23	20	1.92
437714	437828	12	9.6	12	90	0	167	48	33	17	0	1.47
441072	441207	9	15.1	9	75	13	111	39	41	18	0	1.5
441074	441206	18	7.4	18	87	3	196	39	42	18	0	1.51
445944	446076	12	11.6	12	88	9	206	0	18	31	50	1.47
449605	449690	12	7.2	12	90	0	118	9	19	30	40	1.83
450408	450547	12	11.7	12	82	0	145	10	15	35	40	1.8
451347	451491	12	12.1	12	95	1	256	18	15	24	41	1.89
455254	455373	12	10	12	80	3	107	9	36	26	27	1.87
457103	457195	12	7.8	12	91	0	132	15	20	17	47	1.83
459671	459807	9	14.9	9	87	4	166	38	31	27	2	1.69
459671	459808	18	7.5	18	90	2	186	38	31	28	2	1.69
462257	462341	10	8.3	10	92	2	127	40	28	10	21	1.86
462895	462967	12	6.1	12	83	0	101	38	30	21	9	1.86
466812	466895	12	7	12	93	0	123	28	30	21	19	1.97
468648	468780	18	7.4	18	80	3	106	24	45	9	19	1.8
473190	473292	12	8.6	12	90	0	143	35	16	30	17	1.92
478626	478795	12	14.2	12	82	0	169	38	35	25	0	1.61
485141	485200	18	3.3	18	97	0	111	48	15	31	5	1.66
494064	494129	18	3.7	18	95	0	114	45	4	25	24	1.72
495961	496055	20	5	20	81	14	121	0	36	37	25	1.56
