# Supplementary material for: Data mining reveals tissue-specific expression and host lineage-associated forms of Apis mellifera filamentous virus
Source: PeerJ. 2023 Nov 14;11:e16455. doi: 10.7717/peerj.16455 (PMC10655722; doi:10.7717/peerj.16455)
Supplement: Supplemental Information 18 — See text for explanation and methodology. Any use of trade, firm, or product names is for descriptive purposes only and does not imply endorsement by the U.S. Government. [file peerj-11-16455-s018.xlsx]

## Sheet: annotation summary
Supplemental File S7. Summary of Apis mellifera filamentous virus (AmFV) open reading frame (ORF) conservation and characteristics, for those ORFs considered to be evolutionarily conserved (see following worksheet). See text for explanation and methodology. Any use of trade, firm, or product names is for descriptive purposes only and does not imply endorsement by the U.S. Government.
Locus tag	ORF	Strand	Peptides found by Yang et al. (2022)	Modified start?	Signal peptide score >=0.9?	Protein-level percent identity (ignoring gapped positions)	Alignment length	ENC' (from NC_027925.1)	Omega (PAML model 1 average)	Codons analyzed	Tree length	BUSTED P-value	BUSTED P-value (adjusted)	PAML model 2 P-value	PAML model 2 P-value (adjusted)	T-Coffee consistency score	Assigned to expression cluster 1?
APL35_gp001	gp001	minus				77.13	1056	32.4074	0.62277	202	0.331338	0.0254916	0.251391	0.0758168	0.800595	97
APL35_gp002	gp002	minus	yes			90.75	873	21.7838	0.3045	205	0.283606	0.122503	0.5	0.571358	1	96
APL35_gp003	gp003	plus				95.97	219	28.009	0.095189	68	0.191404	0.5	0.5	0.999974	1	91
APL35_gp005	gp005	minus				83.98	1645	27.563	0.288828	242	0.227037	0.00355034	0.0599614	0.777981	1	96	yes
APL35_gp006	gp006	minus				93.14	1768	27.8678	0.281525	345	0.255108	0.465798	0.5	1	1	99
APL35_gp008	gp008	minus				95.22	180	23.7664	0.342744	62	0.126099	0.5	0.5	0.886352	1	99
APL35_gp009	gp009	minus				94.6	406	23.9471	0.21038	108	0.175259	0.5	0.5	0.959842	1	99
APL35_gp011	gp011	minus				98.03	576	21.2207	0.0949091	128	0.152511	0.5	0.5	0.999893	1	100
APL35_gp016	gp016	minus				88.67	1419	28.913	0.33581	307	0.358971	0.5	0.5	0.811747	1	97
APL35_gp017	gp017	plus	yes			96.29	411	27.291	0.21489	124	0.263676	0.456366	0.5	0.213986	1	99
APL35_gp018	gp018	minus				95.04	615	25.4672	0.201001	165	0.23167	0.5	0.5	0.249635	1	99
APL35_gp019	gp019	minus				88.95	1482	31.0166	0.60544	210	0.188383	0.5	0.5	0.780584	1	98
APL35_gp021	gp021	plus	yes			93.94	321	29.3649	0.27352	122	0.324146	0.0809692	0.473359	0.0233572	0.599573	99
APL35_gp022	gp022	plus	yes			98.89	388	33.723	0.06088	94	0.194411	0.5	0.5	1	1	89
APL35_gp023	gp023	plus	yes			98.28	580	29.2788	0.099509	147	0.1833	0.5	0.5	0.999903	1	99
APL35_gp024	gp024	minus				90.38	418	29.2874	0.53517	134	0.251595	0.167887	0.5	0.961469	1	99
APL35_gp025	gp025	minus				87.42	502	29.8907	0.726482	165	0.321653	0.5	0.5	1	1	98
APL35_gp027	gp027	minus				91.27	647	28.7049	0.309951	170	0.231486	0.356991	0.5	1	1	98
APL35_gp028	gp028	minus				96.67	98	31.2867	0.80654	50	0.104219	0.5	0.5	0.567268	1	100
APL35_gp029	gp029	plus				97.03	147	32.6703	0.0773892	60	0.107551	0.5	0.5	0.999976	1	97
APL35_gp033	gp033	minus				92.31	52	41.3987	0.611924	38	0.232393	0.5	0.5	0.999999	1	100	yes
APL35_gp034	gp034	minus				91.16	656	34.0859	0.400481	168	0.296061	0.5	0.5	1	1	96	yes
APL35_gp041	gp041	plus				93.73	2036	31.5383	0.500877	419	0.270917	0.5	0.5	1	1	98	yes
APL35_gp042	gp042	minus				93.92	559	26.7552	0.27589	159	0.255072	0.0871905	0.49085	0.802354	1	99
APL35_gp043	gp043	minus				93.65	1582	26.6294	0.305904	341	0.26605	0.5	0.5	0.0779753	0.800595	99
APL35_gp045	gp045	minus				97.76	807	24.0953	0.08728	156	0.179391	0.247271	0.5	0.816293	1	99
APL35_gp048	gp048	minus		yes		98.62	2388	21.0286	0.0710069	759	0.164571	0.4585	0.4698	0.466688	1	99	yes
APL35_gp049	gp049	minus				96.8	308	21.0184	0.19611	101	0.1896	0.101163	0.5	0.661786	1	99
APL35_gp050	gp050	plus				97.15	1762	28.5066	0.188927	316	0.213713	0.293535	0.5	0.673491	1	99
APL35_gp051	gp051	minus	yes			98	346	31.5253	0.0620294	94	0.135402	0.5	0.5	0.999952	1	99
APL35_gp052	gp052	plus				98.98	564	24.8825	0.0686093	113	0.129177	0.5	0.5	0.99996	1	96
APL35_gp053	gp053	plus	yes			98.41	185	21.2807	0.13356	59	0.139838	0.25523	0.5	0.67193	1	85
APL35_gp054	gp054	plus	yes			94.17	1394	27.6299	0.40641	263	0.31163	1.03e-09	1.5656e-07	0.651605	1	92
APL35_gp055	gp055	plus			yes	95.92	254	33.4365	0.297397	100	0.199894	0.5	0.5	0.999989	1	99
APL35_gp056	gp056	minus	yes			91.92	292	29.1376	0.17657	101	0.237951	0.5	0.5	0.794409	1	97
APL35_gp057	gp057	minus	yes			97.76	333	24.8658	0.10599	116	0.258	0.0324081	0.259265	1	1	99
APL35_gp058	gp058	plus	yes			97.06	1359	25.5283	0.16387	260	0.237236	0.0272896	0.251391	0.596663	1	98
APL35_gp059	gp059	plus				97.72	1221	23.5984	0.14154	199	0.190774	0.5	0.5	1	1	94
APL35_gp060	gp060	plus	yes	yes		95.39	816	23.4479	0.19298	216	0.298845	0.472495	0.5	0.482592	1	98
APL35_gp061	gp061	minus				97.98	66	24.8459	0.18226	38	0.110249	0.5	0.5	0.712851	1	100
APL35_gp062	gp062	minus	yes			97.48	736	32.1645	0.0472153	142	0.166707	0.476566	0.5	0.699987	1	99
APL35_gp063	gp063	plus				93.46	1060	19.1267	0.44455	257	0.308529	0.5	0.5	0.982802	1	95
APL35_gp064	gp064	minus	yes	yes		97.63	194	30.1673	0.14631	73	0.179787	0.5	0.5	0.062941	0.800595	100
APL35_gp065	gp065	plus				94.17	1302	23.8472	0.411044	263	0.265811	0.106574	0.5	0.539497	1	96
APL35_gp067	gp067	minus				84.65	426	32.7093	1	106	0.198523	0.0180645	0.228817	0.0776939	0.800595	98	yes
APL35_gp068	gp068	minus				99.41	325	30.3584	0.0432296	93	0.122996	0.5	0.5	0.999944	1	100	yes
APL35_gp069	gp069	plus				97.61	260	23.3004	0.213791	89	0.151355	0.5	0.5	0.917079	1	100	yes
APL35_gp071	gp071	minus				93.84	279	25.1811	0.61089	98	0.178319	0.5	0.5	0.759753	1	99	yes
APL35_gp072	gp072	minus				86.13	1406	30.4036	0.79932	316	0.347364	0.0459291	0.303531	0.0527581	0.800595	97
APL35_gp073	gp073	minus	yes			89.02	436	34.7302	0.25614	129	0.247214	0.5	0.5	0.726827	1	99
APL35_gp074	gp074	plus				98.38	1955	29.0885	0.0843517	261	0.159911	0.5	0.5	1	1	97
APL35_gp075	gp075	plus				96.68	434	22.493	0.247901	114	0.183253	0.5	0.5	1	1	98
APL35_gp076	gp076	minus				93.92	525	25.674	0.325033	132	0.185723	0.5	0.5	1	1	99
APL35_gp077	gp077	minus	yes			95.38	1384	28.0151	0.09061	205	0.190337	0.486986	0.5	0.990323	1	99
APL35_gp078	gp078	minus	yes			95.62	335	21.62	0.23383	103	0.195773	0.5	0.5	0.548287	1	100
APL35_gp080	gp080	plus				95.77	554	23.8757	0.2683	153	0.212538	0.0408562	0.294649	0.985726	1	98
APL35_gp082	gp082	plus				97.37	509	28.1104	0.140466	134	0.181335	0.5	0.5	1	1	99	yes
APL35_gp083	gp083	plus				91.24	338	25.6971	0.38117	88	0.257542	0.5	0.5	0.999686	1	97
APL35_gp084	gp084	plus				97.74	266	29.5976	0.106339	79	0.134417	0.5	0.5	0.999943	1	99	yes
APL35_gp085	gp085	plus	yes	yes		98.3	90	18.063	0.0586694	52	0.195568	0.5	0.5	0.999972	1	99
APL35_gp086	gp086	minus				88.71	644	22.3004	0.51185	194	0.332215	0.5	0.5	0.85058	1	99
APL35_gp087	gp087	minus				94.35	636	23.7277	0.292842	156	0.202574	0.386548	0.5	1	1	99
APL35_gp088	gp088	plus	yes			98.49	279	21.5852	0.0603494	87	0.142052	0.5	0.5	0.999929	1	99
APL35_gp089	gp089	plus	yes			98.11	449	20.9784	0.13738	112	0.149784	0.195055	0.5	0.865774	1	100
APL35_gp092	gp092	plus	yes			98.2	356	22.521	0.107508	102	0.170649	0.5	0.5	1	1	99
APL35_gp093	gp093	plus				96.77	1711	20.7369	0.18604	271	0.179594	0.0426465	0.294649	0.316028	1	99
APL35_gp095	gp095	plus				95.38	1710	24.8225	0.295921	270	0.218515	0.28388	0.5	0.999999	1	97	yes
APL35_gp096	gp096	minus			yes	93.68	290	24.1965	0.171688	106	0.234799	0.5	0.5	0.999954	1	99
APL35_gp097	gp097	plus	yes			96.9	618	18.4832	0.1657	129	0.17112	0.5	0.5	1	1	99
APL35_gp098	gp098	minus				93.25	759	21.3002	0.19481	157	0.182084	0.461206	0.5	0.771461	1	99
APL35_gp099	gp099	minus	yes			95.17	388	22.4556	0.176274	121	0.217837	0.434972	0.5	1	1	98
APL35_gp100	gp100	minus	yes	yes	yes (covered)	96.8	519	18.7546	0.0683193	112	0.188845	0.5	0.5	0.758805	1	97
APL35_gp101	gp101	plus			yes	95.72	2043	20.4241	0.232038	311	0.238591	0.000447059	0.0169882	0.677425	1	96
APL35_gp102	gp102	minus				89.91	487	28.2636	0.2788	159	0.475933	0.0765298	0.465301	0.0306841	0.67496	98
APL35_gp103	gp103	plus			yes (covered)	93.16	459	26.0872	0.25581	164	0.603554	2.49E-005	0.0018924	0.00352469	0.271425	97
APL35_gp104	gp104	plus	yes			98.99	152	26.3972	0.04015	71	0.253974	0.5	0.5	0.836812	1	100
APL35_gp105	gp105	plus				89.41	371	36.8334	0.3631	130	0.471734	0.5	0.5	8.61675e-05	0.0132702	96
APL35_gp106	gp106	minus				90.28	823	47.8269	0.27336	183	0.434383	0.346486	0.5	0.252904	1	96
APL35_gp108	gp108	minus				88.22	652	49.8252	0.36745	159	0.32544	0.138294	0.5	0.0352426	0.67837	99
APL35_gp110	gp110	minus		yes		96.22	328	30.3851	0.18435	72	0.076641	0.5	0.5	0.00952853	0.366866	99
APL35_gp111	gp111	minus				96.92	495	25.6356	0.14025	96	0.111923	0.444388	0.5	0.0135415	0.417032	99
APL35_gp113	gp113	plus				88.49	2319	27.2982	0.67146	533	0.353459	0.5	0.091461	0.00614836	0.315597	94
APL35_gp114	gp114	plus				99.13	996	19.963	0.05993	142	0.117986	0.5	0.5	0.0654503	0.800595	96	yes
APL35_gp115	gp115	plus				97.59	84	22.2927	0.05286	41	0.105339	0.17824	0.5	0.179952	1	98
APL35_gp116	gp116	minus				84.98	501	32.7568	0.69379	169	0.358758	0.0294521	0.251391	0.179807	1	98
APL35_gp117	gp117	minus	yes			100	87	20.7356	1e-05	46	0.036501	0.5	0.5	0.999953	1	100
APL35_gp118	gp118	plus				98.22	60	45.6772	0.94658	37	0.050848	0.5	0.5	0.994478	1	100
APL35_gp119	gp119	minus				90.14	1104	28.0271	0.39968	213	0.227877	0.496338	0.5	0.630776	1	98	yes
APL35_gp122	gp122	minus	yes			98.18	539	22.7826	0.112552	122	0.157161	0.5	0.5	0.832653	1	99	yes
APL35_gp123	gp123	minus				97.96	843	22.9693	0.117043	140	0.118546	0.5	0.5	1	1	99	yes
APL35_gp124	gp124	minus				98.74	486	22.3158	0.0295997	123	0.168982	0.306384	0.5	0.999819	1	100	yes
APL35_gp125	gp125	minus				98.99	191	25.137	0.0634894	70	0.148607	0.5	0.5	0.999989	1	100	yes
APL35_gp126	gp126	minus				99.42	298	24.9188	0.0302097	86	0.1405	0.5	0.5	0.999973	1	100	yes
APL35_gp127	gp127	plus				90.31	1344	31.3326	0.46992	324	0.367045	0.5	0.5	0.991607	1	96	yes
APL35_gp128	gp128	plus	yes			97.72	518	22.2245	0.22495	104	0.115529	0.323824	0.5	0.415964	1	98
APL35_gp129	gp129	minus				95.02	245	32.6589	0.46722	88	0.282503	0.5	0.5	0.66054	1	98	yes
APL35_gp130	gp130	plus	yes	yes		99.49	170	22.8323	0.03537	70	0.148445	0.5	0.5	1	1	100	yes
APL35_gp133	gp133	plus				95.34	156	25.6184	0.232162	80	0.25321	0.5	0.5	1	1	99
APL35_gp138	gp138	plus	yes			96.46	449	25.1747	0.18836	129	0.218246	0.421899	0.5	0.5956	1	99
APL35_gp139	gp139	minus	yes			93.26	171	33.9908	0.354596	88	0.273074	0.343367	0.5	0.999991	1	96
APL35_gp140	gp140	plus	yes			95.3	1470	24.4058	0.24459	295	0.26733	0.00138604	0.0383475	0.0729255	0.800595	98
APL35_gp141	gp141	plus	yes			96.98	197	24.2781	0.15312	81	0.227444	0.5	0.5	0.443375	1	98
APL35_gp143	gp143	minus				92.98	375	31.3025	0.310549	121	0.206335	0.5	0.5	1	1	99
APL35_gp144	gp144	minus				86.26	658	40.0794	0.346357	178	0.310809	0.0018521	0.0402169	0.82312	1	98	yes
APL35_gp146	gp146	minus	yes			98.37	217	27.3356	0.0799592	82	0.184685	0.5	0.5	0.999945	1	100
APL35_gp148	gp148	minus	yes			97.46	404	24.7689	0.0381796	89	0.115479	0.5	0.5	0.999939	1	98	yes
APL35_gp149	gp149	plus	yes			99.74	126	21.073	0.0384096	47	0.076234	0.203251	0.5	0.999989	1	100
APL35_gp150	gp150	plus				91.65	215	25.1108	0.677733	86	0.266418	0.5	0.5	1	1	95
APL35_gp151	gp151	plus	yes			99.14	505	22.8529	0.0265032	112	0.191909	0.276666	0.5	1	1	94
APL35_gp152	gp152	minus				90.43	1094	34.1309	0.297068	231	0.284137	0.335107	0.5	1	1	96
APL35_gp154	gp154	plus	yes			97.49	862	23.2021	0.102168	185	0.209181	0.5	0.5	0.963074	1	99
APL35_gp156	gp156	plus	yes			98.58	252	23.9552	0.0831492	80	0.11786	0.5	0.5	0.999963	1	99
APL35_gp157	gp157	minus	yes			98.78	203	20.9571	0.0632294	73	0.125792	0.5	0.5	0.999964	1	99
APL35_gp159	gp159	plus				99.05	63	27.9708	0.0806992	NA (only five sequences available)	0.087086	NA	NA	NA	NA	NA
APL35_gp161	gp161	minus	yes			99.7	331	23.677	0.0110999	82	0.120391	0.49478	0.5	0.99999	1	100
APL35_gp162	gp162	plus				100	73	29.0691	1e-05	38	0.123658	0.5	0.5	0.999909	1	100
APL35_gp163	gp163	plus				97.19	57	29.0097	0.389676	38	0.126679	0.5	0.5	0.999999	1	100
APL35_gp164	gp164	plus	yes			96.76	240	22.7232	0.309652	80	0.174315	0.5	0.5	0.98073	1	93
APL35_gp165	gp165	minus		yes		97.36	621	29.0029	0.129277	140	0.172696	0.5	0.5	1	1	99	yes
APL35_gp166	gp166	minus				99.59	131	25.2915	0.0231798	59	0.140733	0.5	0.5	0.999993	1	100	yes
APL35_gp168	gp168	minus				93.38	1090	34.2204	0.25335	236	0.250138	0.5	0.5	0.400147	1	99	yes
APL35_gp169	gp169	plus				94.49	115	27.8204	1	54	0.126822	0.0230008	0.251391	0.159402	1	100
APL35_gp170	gp170	plus				93.28	250	30.0346	0.242619	118	0.38758	0.287521	0.5	0.729373	1	100
APL35_gp173	gp173	plus				90.18	377	27.8644	0.321475	143	0.406319	0.5	0.5	1	1	97
APL35_gp174	gp174	plus				94.08	139	20.6875	0.412366	47	0.259607	0.5	0.5	0.999997	1	100	yes
APL35_gp175	gp175	minus		yes		98.47	270	23.8171	0.0936069	86	0.146946	0.5	0.5	1	1	100
APL35_gp182	gp182	plus	yes	yes		81.74	860	24.8226	0.279565	342	1.57558	0.0125829	0.173872	1	1	97
APL35_gp183	gp183	minus				88.23	2186	25.3669	0.261261	414	0.396585	0.0756827	0.465301	0.946022	1	96	yes
APL35_gp188	gp188	plus				98.44	338	19.3414	0.114229	95	0.135385	0.5	0.5	0.999963	1	100	yes
APL35_gp192	gp192	plus				94.67	50	37.7619	0.800372	36	0.173048	0.5	0.5	1	1	100
APL35_gp193	gp193	minus		yes		85.9	856	33.1005	0.61395	238	0.325674	0.0079	0.12008	0.700715	1	97
APL35_gp198	gp198	minus		yes	yes (covered)	93.33	454	25.8705	0.266576	121	0.168808	0.5	0.5	1	1	99	yes
APL35_gp200	gp200	plus	yes			96.64	1041	32.2572	0.23369	228	0.222374	0.02977	0.251391	0.935574	1	99	yes
APL35_gp202	gp202	plus				94.42	209	37.4052	0.306917	92	0.278332	0.5	0.5	0.999984	1	100	yes
APL35_gp206	gp206	plus				95.47	768	31.2222	0.251721	190	0.229495	0.5	0.5	0.893126	1	98	yes
APL35_gp210	gp210	plus				89.65	165	19.0415	1	85	0.311253	0.454622	0.5	0.638732	1	97	yes
APL35_gp211	gp211	plus				91.24	805	37.8936	0.56813	248	0.360958	0.0236295	0.251391	0.595468	1	98	yes
APL35_gp212	gp212	minus				97.58	424	25.4926	0.0334197	93	0.11936	0.5	0.5	0.999981	1	98	yes
APL35_gp214	gp214	minus				91.11	228	22.2358	0.66557	82	0.217013	0.192478	0.5	1	1	97	yes
APL35_gp215	gp215	minus	yes			94.64	2548	25.0417	0.161179	308	0.174496	0.5	0.5	1	1	98
APL35_gp216	gp216	plus				94.3	1929	31.3687	0.394914	399	0.263232	0.209851	0.5	0.997625	1	99	yes
APL35_gp217	gp217	plus				100	143	25.96	1e-05	69	0.157897	0.5	0.5	0.999764	1	100	yes
APL35_gp218	gp218	minus				95.7	748	33.6129	0.235484	164	0.201623	0.385553	0.5	1	1	99
APL35_gp219	gp219	minus				87.78	1518	37.1522	0.63575	335	0.316825	0.302265	0.5	0.596167	1	98	yes
APL35_gp220	gp220	minus				92.19	152	36.8598	0.64577	79	0.302402	0.5	0.5	0.232746	1	100
APL35_gp221	gp221	minus				92.45	491	31.5957	0.64713	139	0.210581	0.328353	0.5	0.409228	1	99
APL35_gp225	gp225	plus				91.32	1285	32.0614	0.58894	315	0.336526	0.035825	0.27227	0.396134	1	97
APL35_gp226	gp226	plus				92.51	483	27.7657	0.88586	138	0.220664	0.149073	0.5	0.452061	1	97
APL35_gp229	gp229	plus				93.39	913	29.6102	0.506402	214	0.230269	0.00151372	0.0383475	0.295434	1	98	yes
APL35_gp230	gp230	plus				91.04	1443	33.9064	0.54274	354	0.351332	0.000377335	0.0169882	0.97753	1	97	yes
APL35_gp232	gp232	plus		yes		92.37	97	37.0553	0.821972	60	0.249189	0.5	0.5	1	1	100
APL35_gp233	gp233	minus	yes			96.1	82	24.0784	0.44992	51	0.170851	0.00248949	0.0473004	0.532848	1	100
APL35_gp235	gp235	minus	yes			94.56	451	28.6235	0.09351	104	0.260704	0.5	0.5	0.275783	1	98
APL35_gp236	gp236	plus				92.58	499	37.2248	0.756792	205	0.756792	0.480148	0.5	0.999863	1	99
APL35_gp237	gp237	plus				93.85	1966	37.1074	0.695403	402	0.695403	0.188405	0.5	0.12937	1	97

## Sheet: evaluation of ORF conservation
Supplemental File S7: classification of ORFs annotated in the RefSeq reference genome for AmFV, based on evolutionary conservation (see Supplemental File S3 for sequence alignments).
ORF	Locus tag from NC_027925.1	status
gp001	APL35_gp001	kept
gp002	APL35_gp002	kept
gp003	APL35_gp003	kept
gp004	APL35_gp004	failed
gp005	APL35_gp005	kept
gp006	APL35_gp006	kept
gp007	APL35_gp007	indeterminate
gp008	APL35_gp008	kept
gp009	APL35_gp009	kept
gp010	APL35_gp010	failed
gp011	APL35_gp011	kept
gp012	APL35_gp012	indeterminate
gp013	APL35_gp013	indeterminate
gp014	APL35_gp014	failed
gp015	APL35_gp015	indeterminate
gp016	APL35_gp016	kept
gp017	APL35_gp017	kept
gp018	APL35_gp018	kept
gp019	APL35_gp019	kept
gp020	APL35_gp020	failed
gp021	APL35_gp021	kept
gp022	APL35_gp022	kept
gp023	APL35_gp023	kept
gp024	APL35_gp024	kept
gp025	APL35_gp025	kept
gp026	APL35_gp026	indeterminate
gp027	APL35_gp027	kept
gp028	APL35_gp028	kept
gp029	APL35_gp029	kept
gp030	APL35_gp030	failed
gp031	APL35_gp031	indeterminate
gp032	APL35_gp032	failed
gp033	APL35_gp033	kept
gp034	APL35_gp034	kept
gp035	APL35_gp035	failed
gp036	APL35_gp036	failed
gp037	APL35_gp037	failed
gp038	APL35_gp038	indeterminate
gp039	APL35_gp039	failed
gp040	APL35_gp040	failed
gp041	APL35_gp041	kept
gp042	APL35_gp042	kept
gp043	APL35_gp043	kept
gp044	APL35_gp044	indeterminate
gp045	APL35_gp045	kept
gp046	APL35_gp046	failed
gp047	APL35_gp047	indeterminate
gp048	APL35_gp048	passed
gp049	APL35_gp049	kept
gp050	APL35_gp050	kept
gp051	APL35_gp051	kept
gp052	APL35_gp052	kept
gp053	APL35_gp053	kept
gp054	APL35_gp054	kept
gp055	APL35_gp055	kept
gp056	APL35_gp056	kept
gp057	APL35_gp057	kept
gp058	APL35_gp058	kept
gp059	APL35_gp059	kept
gp060	APL35_gp060	kept
gp061	APL35_gp061	kept
gp062	APL35_gp062	kept
gp063	APL35_gp063	kept
gp064	APL35_gp064	kept
gp065	APL35_gp065	kept
gp066	APL35_gp066	indeterminate
gp067	APL35_gp067	kept
gp068	APL35_gp068	kept
gp069	APL35_gp069	kept
gp070	APL35_gp070	failed
gp071	APL35_gp071	kept
gp072	APL35_gp072	kept
gp073	APL35_gp073	kept
gp074	APL35_gp074	kept
gp075	APL35_gp075	kept
gp076	APL35_gp076	kept
gp077	APL35_gp077	kept
gp078	APL35_gp078	kept
gp079	APL35_gp079	failed
gp080	APL35_gp080	kept
gp081	APL35_gp081	indeterminate
gp082	APL35_gp082	kept
gp083	APL35_gp083	kept
gp084	APL35_gp084	kept
gp085	APL35_gp085	kept
gp086	APL35_gp086	kept
gp087	APL35_gp087	kept
gp088	APL35_gp088	kept
gp089	APL35_gp089	kept
gp090	APL35_gp090	indeterminate
gp091	APL35_gp091	failed
gp092	APL35_gp092	kept
gp093	APL35_gp093	kept
gp094	APL35_gp094	failed
gp095	APL35_gp095	kept
gp096	APL35_gp096	kept
gp097	APL35_gp097	kept
gp098	APL35_gp098	kept
gp099	APL35_gp099	kept
gp100	APL35_gp100	kept
gp101	APL35_gp101	kept
gp102	APL35_gp102	kept
gp103	APL35_gp103	kept
gp104	APL35_gp104	kept
gp105	APL35_gp105	kept
gp106	APL35_gp106	kept
gp107	APL35_gp107	indeterminate
gp108	APL35_gp108	kept
gp109	APL35_gp109	indeterminate
gp110	APL35_gp110	kept
gp111	APL35_gp111	kept
gp112	APL35_gp112	failed
gp113	APL35_gp113	kept
gp114	APL35_gp114	kept
gp115	APL35_gp115	kept
gp116	APL35_gp116	kept
gp117	APL35_gp117	kept
gp118	APL35_gp118	kept
gp119	APL35_gp119	kept
gp120	APL35_gp120	failed
gp121	APL35_gp121	indeterminate
gp122	APL35_gp122	kept
gp123	APL35_gp123	kept
gp124	APL35_gp124	kept
gp125	APL35_gp125	kept
gp126	APL35_gp126	kept
gp127	APL35_gp127	kept
gp128	APL35_gp128	kept
gp129	APL35_gp129	kept
gp130	APL35_gp130	kept
gp131	APL35_gp131	failed
gp132	APL35_gp132	indeterminate
gp133	APL35_gp133	kept
gp134	APL35_gp134	indeterminate
gp135	APL35_gp135	indeterminate
gp136	APL35_gp136	failed
gp137	APL35_gp137	failed
gp138	APL35_gp138	kept
gp139	APL35_gp139	kept
gp140	APL35_gp140	kept
gp141	APL35_gp141	kept
gp142	APL35_gp142	failed
gp143	APL35_gp143	kept
gp144	APL35_gp144	kept
gp145	APL35_gp145	indeterminate
gp146	APL35_gp146	kept
gp147	APL35_gp147	failed
gp148	APL35_gp148	kept
gp149	APL35_gp149	kept
gp150	APL35_gp150	kept
gp151	APL35_gp151	kept
gp152	APL35_gp152	kept
gp153	APL35_gp153	failed
gp154	APL35_gp154	kept
gp155	APL35_gp155	failed
gp156	APL35_gp156	kept
gp157	APL35_gp157	kept
gp158	APL35_gp158	failed
gp159	APL35_gp159	kept
gp160	APL35_gp160	failed
gp161	APL35_gp161	kept
gp162	APL35_gp162	kept
gp163	APL35_gp163	kept
gp164	APL35_gp164	kept
gp165	APL35_gp165	kept
gp166	APL35_gp166	kept
gp167	APL35_gp167	failed
gp168	APL35_gp168	kept
gp169	APL35_gp169	kept
gp170	APL35_gp170	kept
gp171	APL35_gp171	failed
gp172	APL35_gp172	failed
gp173	APL35_gp173	kept
gp174	APL35_gp174	kept
gp175	APL35_gp175	kept
gp176	APL35_gp176	failed
gp177	APL35_gp177	failed
gp178	APL35_gp178	failed
gp179	APL35_gp179	failed
gp180	APL35_gp180	indeterminate
gp181	APL35_gp181	failed
gp182	APL35_gp182	kept
gp183	APL35_gp183	kept
gp184	APL35_gp184	indeterminate
gp185	APL35_gp185	failed
gp186	APL35_gp186	indeterminate
gp187	APL35_gp187	indeterminate
gp188	APL35_gp188	kept
gp189	APL35_gp189	failed
gp190	APL35_gp190	indeterminate
gp191	APL35_gp191	failed
gp192	APL35_gp192	kept
gp193	APL35_gp193	kept
gp194	APL35_gp194	indeterminate
gp195	APL35_gp195	indeterminate
gp196	APL35_gp196	failed
gp197	APL35_gp197	indeterminate
gp198	APL35_gp198	kept
gp199	APL35_gp199	indeterminate
gp200	APL35_gp200	kept
gp201	APL35_gp201	failed
gp202	APL35_gp202	kept
gp203	APL35_gp203	failed
gp204	APL35_gp204	failed
gp205	APL35_gp205	failed
gp206	APL35_gp206	kept
gp207	APL35_gp207	failed
gp208	APL35_gp208	indeterminate
gp209	APL35_gp209	indeterminate
gp210	APL35_gp210	kept
gp211	APL35_gp211	kept
gp212	APL35_gp212	kept
gp213	APL35_gp213	failed
gp214	APL35_gp214	kept
gp215	APL35_gp215	kept
gp216	APL35_gp216	kept
gp217	APL35_gp217	kept
gp218	APL35_gp218	kept
gp219	APL35_gp219	kept
gp220	APL35_gp220	kept
gp221	APL35_gp221	kept
gp222	APL35_gp222	failed
gp223	APL35_gp223	failed
gp224	APL35_gp224	failed
gp225	APL35_gp225	kept
gp226	APL35_gp226	kept
gp227	APL35_gp227	failed
gp228	APL35_gp228	failed
gp229	APL35_gp229	kept
gp230	APL35_gp230	kept
gp231	APL35_gp231	failed
gp232	APL35_gp232	kept
gp233	APL35_gp233	kept
gp234	APL35_gp234	failed
gp235	APL35_gp235	kept
gp236	APL35_gp236	kept
gp237	APL35_gp237	kept
gp238	APL35_gp238	indeterminate
gp239	APL35_gp239	indeterminate
gp240	APL35_gp240	indeterminate
gp241	APL35_gp241	indeterminate

## Sheet: DELTA Blast summary
Supplemental File S7: Summary of open reading frame (ORF) protein alignments to the Conserved Domain Database (CDD) of the National Center for Biotechnology Information (NCBI), identified with the DELTA Blast tool at an expectation of 1E-10 or lower. For each ORF, all significant hits to CDD domains are listed and are shaded alternately white or gray as a visual aid. Any use of trade, firm, or pr…
ORF	Protein	CDD ID	%ID				Query start	Query end			E-value	Bit score	Source ID	Short domain name	Domain description
gp001	YP_009165752.1	CDD:274009	12.5	328	260	5	186	497	194	510	1.19e-11	68.4	TIGR02169	SMC_prok_A	chromosome segregation protein SMC, primarily archaeal type. SMC (structural maintenance of chromosomes) proteins bind DNA and act in organizing and segregating chromosomes for partition. SMC proteins are found in bacteria, archaea, and eukaryotes. It is found in a single copy and is homodimeric in prokaryotes, but six paralogs (excluded from this family) are found in eukarotes, where SMC protein…
gp002	YP_009165753.1	CDD:336840	25.926	108	70	3	444	548	1	101	5.14e-35	131	pfam07859	Abhydrolase_3	alpha/beta hydrolase fold. This catalytic domain is found in a very wide range of enzymes.
gp002	YP_009165753.1	CDD:223730	16.111	180	137	3	372	548	14	182	2.58e-34	132	COG0657	Aes	Acetyl esterase/lipase [Lipid transport and metabolism].
gp002	YP_009165753.1	CDD:317997	19.62	158	126	1	288	444	50	207	1.5e-13	70.6	pfam15694	Med26_M	Mediator complex subunit 26 middle domain. Med26_M is the middle domain of subunit 26 of Mediator. Med19 and Med26 act synergistically to mediate the interaction between REST (a Kruppel-type zinc finger transcription factor that binds to a 21-bp RE1 silencing element present in over 900 human genes) and Mediator.
gp002	YP_009165753.1	CDD:225181	13.369	187	118	8	381	539	29	199	1.54e-13	73.3	COG2272	PnbA	Carboxylesterase type B [Lipid transport and metabolism].
gp002	YP_009165753.1	CDD:317767	17.915	307	198	5	144	440	477	739	2.25e-12	70.2	pfam15402	Spc7_N	N-terminus of kinetochore NMS complex subunit Spc7.
gp002	YP_009165753.1	CDD:333868	13.793	174	113	6	380	529	30	190	1.18e-11	67.1	pfam00135	COesterase	Carboxylesterase family.
gp005	YP_009165756.1	CDD:239805	35.714	56	34	1	1274	1327	101	156	3.58e-22	93.6	cd04278	ZnMc_MMP	Zinc-dependent metalloprotease, matrix metalloproteinase (MMP) sub-family. MMPs are responsible for a great deal of pericellular proteolysis of extracellular matrix and cell surface molecules, playing crucial roles in morphogenesis, cell fate specification, cell migration, tissue repair, tumorigenesis, gain or loss of tissue-specific functions, and apoptosis. In many instances, they are anchored …
gp005	YP_009165756.1	CDD:334067	29.091	55	36	1	1276	1327	104	158	4.02e-20	87.9	pfam00413	Peptidase_M10	Matrixin. The members of this family are enzymes that cleave peptides. These proteases require zinc for catalysis.
gp005	YP_009165756.1	CDD:214576	24.49	49	31	2	1283	1325	87	135	2.04e-13	67.8	smart00235	ZnMc	Zinc-dependent metalloprotease. Neutral zinc metallopeptidases. This alignment represents a subset of known subfamilies. Highest similarity occurs in the HExxH zinc-binding site/ active site.
gp005	YP_009165756.1	CDD:239806	25.424	59	40	2	1273	1327	97	155	1.11e-12	66.3	cd04279	ZnMc_MMP_like_1	Zinc-dependent metalloprotease; MMP_like sub-family 1. A group of bacterial, archaeal, and fungal metalloproteinase domains similar to matrix metalloproteinases and astacin.
gp005	YP_009165756.1	CDD:213029	26.667	30	22	0	1278	1307	121	150	7.36e-12	64.4	cd11375	Peptidase_M54	Peptidase family M54, also called archaemetzincins or archaelysins. Peptidase M54 (archaemetzincin or archaelysin) is a zinc-dependent aminopeptidase that contains the consensus zinc-binding sequence HEXXHXXGXXH/D and a conserved Met residue at the active site, and is thus classified as a metzincin. Archaemetzincins, first identified in archaea, are also found in bacteria and eukaryotes, includin…
gp005	YP_009165756.1	CDD:237325	25.641	39	29	0	1277	1315	122	160	2.43e-11	63.2	PRK13267	PRK13267	archaemetzincin-like protein; Reviewed
gp011	YP_009165762.1	CDD:276812	31.503	346	202	7	41	372	2	326	6.94e-180	509	cd00106	KISc	Kinesin motor domain. Kinesin motor domain. This catalytic (head) domain has ATPase activity and belongs to the larger group of P-loop NTPases. Kinesins are microtubule-dependent molecular motors that play important roles in intracellular transport and in cell division. In most kinesins, the motor domain is found at the N-terminus (N-type), in some its is found in the middle (M-type), or C-termin…
gp011	YP_009165762.1	CDD:214526	29.598	348	214	7	41	376	2	330	9.93e-180	509	smart00129	KISc	Kinesin motor, catalytic domain. ATPase. Microtubule-dependent molecular motors that play important roles in intracellular transport of organelles and in cell division.
gp011	YP_009165762.1	CDD:333938	30.321	343	206	8	46	374	1	324	2.86e-173	492	pfam00225	Kinesin	Kinesin motor domain.
gp011	YP_009165762.1	CDD:276823	28.212	358	215	8	41	375	3	341	1.41e-169	483	cd01372	KISc_KIF4	Kinesin motor domain, KIF4-like subfamily. Kinesin motor domain, KIF4-like subfamily. Members of this group seem to perform a variety of functions, and have been implicated in neuronal organelle transport and chromosome segregation during mitosis. This catalytic (head) domain has ATPase activity and belongs to the larger group of P-loop NTPases. Kinesins are microtubule-dependent molecular motors…
gp011	YP_009165762.1	CDD:276820	33.43	344	197	7	41	374	4	325	1.48e-162	465	cd01369	KISc_KHC_KIF5	Kinesin motor domain, kinesin heavy chain (KHC) or KIF5-like subgroup. Kinesin motor domain, kinesin heavy chain (KHC) or KIF5-like subgroup. Members of this group have been associated with organelle transport. This catalytic (head) domain has ATPase activity and belongs to the larger group of P-loop NTPases. Kinesins are microtubule-dependent molecular motors that play important roles in intrace…
gp011	YP_009165762.1	CDD:276817	27.429	350	214	10	41	375	4	328	1.59e-160	460	cd01366	KISc_C_terminal	Kinesin motor domain, KIFC2/KIFC3/ncd-like carboxy-terminal kinesins. Kinesin motor domain, KIFC2/KIFC3/ncd-like carboxy-terminal kinesins. Ncd is a spindle motor protein necessary for chromosome segregation in meiosis. KIFC2/KIFC3-like kinesins have been implicated in motility of the Golgi apparatus as well as dentritic and axonal transport in neurons. This catalytic (head) domain has ATPase act…
gp011	YP_009165762.1	CDD:276815	27.887	355	229	8	39	376	2	346	5.4e-160	459	cd01364	KISc_BimC_Eg5	Kinesin motor domain, BimC/Eg5 spindle pole proteins. Kinesin motor domain, BimC/Eg5 spindle pole proteins, participate in spindle assembly and chromosome segregation during cell division. This catalytic (head) domain has ATPase activity and belongs to the larger group of P-loop NTPases. Kinesins are microtubule-dependent molecular motors that play important roles in intracellular transport and i…
gp011	YP_009165762.1	CDD:276821	27.095	358	221	6	42	374	3	345	2.25e-157	453	cd01370	KISc_KIP3_like	Kinesin motor domain, KIP3-like subgroup. Kinesin motor domain, KIP3-like subgroup. The yeast kinesin KIP3 plays a role in positioning the mitotic spindle. This catalytic (head) domain has ATPase activity and belongs to the larger group of P-loop NTPases. Kinesins are microtubule-dependent molecular motors that play important roles in intracellular transport and in cell division. In most kinesins…
gp011	YP_009165762.1	CDD:276825	29.769	346	205	7	41	374	2	321	1.57e-156	449	cd01374	KISc_CENP_E	Kinesin motor domain, CENP-E/KIP2-like subgroup. Kinesin motor domain, CENP-E/KIP2-like subgroup, involved in chromosome movement and/or spindle elongation during mitosis. This catalytic (head) domain has ATPase activity and belongs to the larger group of P-loop NTPases. Kinesins are microtubule-dependent molecular motors that play important roles in intracellular transport and in cell division. …
gp011	YP_009165762.1	CDD:276816	26.703	367	225	9	41	376	3	356	2.33e-153	443	cd01365	KISc_KIF1A_KIF1B	Kinesin motor domain, KIF1_like proteins. Kinesin motor domain, KIF1_like proteins. KIF1A (Unc104) transports synaptic vesicles to the nerve terminal, KIF1B has been implicated in transport of mitochondria. Both proteins are expressed in neurons. This catalytic (head) domain has ATPase activity and belongs to the larger group of P-loop NTPases. Kinesins are microtubule-dependent molecular motors …
gp011	YP_009165762.1	CDD:227392	21.756	501	343	8	51	531	15	486	1.86e-148	438	COG5059	KIP1	Kinesin-like protein [Cytoskeleton].
gp011	YP_009165762.1	CDD:276818	26.608	342	226	8	41	372	2	328	2.8e-145	421	cd01367	KISc_KIF2_like	Kinesin motor domain, KIF2-like group. Kinesin motor domain, KIF2-like group. KIF2 is a protein expressed in neurons, which has been associated with axonal transport and neuron development; alternative splice forms have been implicated in lysosomal translocation. This catalytic (head) domain has ATPase activity and belongs to the larger group of P-loop NTPases. Kinesins are microtubule-dependent …
gp011	YP_009165762.1	CDD:318905	18.354	158	85	4	41	193	22	140	5.42e-32	119	pfam16796	Microtub_bd	Microtubule binding. This motor homology domain binds microtubules and lacks an ATP-binding site.
gp011	YP_009165762.1	CDD:227392	32.558	86	54	3	231	314	485	568	2.42e-21	96.7	COG5059	KIP1	Kinesin-like protein [Cytoskeleton].
gp011	YP_009165762.1	CDD:276814	15.441	272	113	9	43	310	1	159	3.42e-20	87.1	cd01363	Motor_domain	Myosin and Kinesin motor domain. Myosin and Kinesin motor domain. These ATPases belong to the P-loop NTPase family and provide the driving force in myosin and kinesin mediated processes. Some of the names do not match with what is given in the sequence list. This is because they are based on the current nomenclature by Kollmar/Sebe-Pedros.
gp011	YP_009165762.1	CDD:274009	15.873	189	143	4	372	545	751	938	6.51e-15	77.4	TIGR02169	SMC_prok_A	chromosome segregation protein SMC, primarily archaeal type. SMC (structural maintenance of chromosomes) proteins bind DNA and act in organizing and segregating chromosomes for partition. SMC proteins are found in bacteria, archaea, and eukaryotes. It is found in a single copy and is homodimeric in prokaryotes, but six paralogs (excluded from this family) are found in eukarotes, where SMC protein…
gp011	YP_009165762.1	CDD:275316	13.5	200	166	2	369	561	215	414	1.36e-14	75.9	TIGR04523	Mplasa_alph_rch	helix-rich Mycoplasma protein. Members of this family occur strictly within a subset of Mycoplasma species. Members average 750 amino acids in length, including signal peptide. Sequences are predicted (Jpred 3) to be almost entirely alpha-helical. These sequences show strong periodicity (consistent with long alpha helical structures) and low complexity rich in D,E,N,Q, and K. Genes encoding these…
gp011	YP_009165762.1	CDD:274009	13.018	169	146	1	401	568	751	919	2.9e-12	68.6	TIGR02169	SMC_prok_A	chromosome segregation protein SMC, primarily archaeal type. SMC (structural maintenance of chromosomes) proteins bind DNA and act in organizing and segregating chromosomes for partition. SMC proteins are found in bacteria, archaea, and eukaryotes. It is found in a single copy and is homodimeric in prokaryotes, but six paralogs (excluded from this family) are found in eukarotes, where SMC protein…
gp011	YP_009165762.1	CDD:317485	17.46	189	147	3	376	560	80	263	4.25e-12	67.8	pfam15070	GOLGA2L5	Putative golgin subfamily A member 2-like protein 5. The function of the GOLGA2L5 protein family remains unknown. This family of proteins is thought to be found in the Golgi apparatus of eukaryotes. Proteins in this family are typically between and 840 amino acids in length.
gp011	YP_009165762.1	CDD:274009	11.538	182	136	4	379	537	674	853	7.79e-12	67.4	TIGR02169	SMC_prok_A	chromosome segregation protein SMC, primarily archaeal type. SMC (structural maintenance of chromosomes) proteins bind DNA and act in organizing and segregating chromosomes for partition. SMC proteins are found in bacteria, archaea, and eukaryotes. It is found in a single copy and is homodimeric in prokaryotes, but six paralogs (excluded from this family) are found in eukarotes, where SMC protein…
gp011	YP_009165762.1	CDD:236892	10.132	227	176	4	355	561	111	329	4.97e-11	64.7	PRK11281	PRK11281	mechanosensitive channel MscK.
gp016	YP_009165767.1	CDD:334947	30.208	96	62	1	204	294	1	96	2.6e-43	151	pfam02498	Bro-N	BRO family, N-terminal domain. This family includes the N-terminus of baculovirus BRO and ALI motif proteins. The function of BRO proteins is unknown. It has been suggested that BRO-A and BRO-C are DNA binding proteins that influence host DNA replication and/or transcription. This Pfam domain does not include the characteristic invariant alanine, leucine, isoleucine motif of the ALI proteins.
gp016	YP_009165767.1	CDD:214989	18.605	86	69	1	209	294	5	89	4.8e-34	124	smart01040	Bro-N	BRO family, N-terminal domain. This family includes the N-terminus of baculovirus BRO and ALI motif proteins. The function of BRO proteins is unknown. It has been suggested that BRO-A and BRO-C are DNA binding proteins that influence host DNA replication and/or transcription. This Pfam domain does not include the characteristic invariant alanine, leucine, isoleucine motif of the ALI proteins.
gp016	YP_009165767.1	CDD:226144	20.43	93	71	1	208	300	21	110	8.3e-34	127	COG3617	COG3617	Prophage antirepressor [Mobilome: prophages, transposons].
gp023	YP_009165774.1	CDD:179699	22.593	270	170	10	327	593	139	372	1.62e-60	206	PRK03992	PRK03992	proteasome-activating nucleotidase; Provisional
gp023	YP_009165774.1	CDD:224143	22.348	264	166	10	327	587	159	386	1.19e-58	201	COG1222	RPT1	ATP-dependent 26S proteasome regulatory subunit [Posttranslational modification, protein turnover, chaperones].
gp023	YP_009165774.1	CDD:223540	25.7	393	210	14	206	595	172	485	2.19e-58	203	COG0464	SpoVK	AAA+-type ATPase, SpoVK/Ycf46/Vps4 family [Cell wall/membrane/envelope biogenesis, Cell cycle control, cell division, chromosome partitioning, Signal transduction mechanisms].
gp023	YP_009165774.1	CDD:273520	21.402	271	175	8	328	596	64	298	3.68e-58	202	TIGR01241	FtsH_fam	ATP-dependent metalloprotease FtsH. HflB(FtsH) is a pleiotropic protein required for correct cell division in bacteria. It has ATP-dependent zinc metalloprotease activity. It was formerly designated cell division protein FtsH. [Cellular processes, Cell division, Protein fate, Degradation of proteins, peptides, and glycopeptides]
gp023	YP_009165774.1	CDD:223541	20.588	272	176	8	328	596	159	393	4.92e-57	201	COG0465	HflB	ATP-dependent Zn proteases [Posttranslational modification, protein turnover, chaperones].
gp023	YP_009165774.1	CDD:223540	21.111	270	174	10	338	605	4	236	7.41e-53	188	COG0464	SpoVK	AAA+-type ATPase, SpoVK/Ycf46/Vps4 family [Cell wall/membrane/envelope biogenesis, Cell cycle control, cell division, chromosome partitioning, Signal transduction mechanisms].
gp023	YP_009165774.1	CDD:214386	23.6	250	166	7	334	581	198	424	1.01e-52	190	CHL00176	ftsH	cell division protein; Validated
gp023	YP_009165774.1	CDD:333757	31.429	140	84	3	363	500	1	130	2.6e-42	148	pfam00004	AAA	ATPase family associated with various cellular activities (AAA). AAA family proteins often perform chaperone-like functions that assist in the assembly, operation, or disassembly of protein complexes.
gp023	YP_009165774.1	CDD:99707	23.757	181	103	6	325	500	1	151	5.64e-32	120	cd00009	AAA	The AAA+ (ATPases Associated with a wide variety of cellular Activities) superfamily represents an ancient group of ATPases belonging to the ASCE (for additional strand, catalytic E) division of the P-loop NTPase fold. The ASCE division also includes ABC, RecA-like, VirD4-like, PilT-like, and SF1/2 helicases. Members of the AAA+ ATPases function as molecular chaperons, ATPase subunits of protease…
gp023	YP_009165774.1	CDD:214640	23.377	154	96	4	362	502	4	148	5.48e-24	97.6	smart00382	AAA	ATPases associated with a variety of cellular activities. AAA - ATPases associated with a variety of cellular activities. This profile/alignment only detects a fraction of this vast family. The poorly conserved N-terminal helix is missing from the alignment.
gp023	YP_009165774.1	CDD:273258	16.554	296	226	8	328	609	311	599	1.59e-22	101	TIGR00763	lon	endopeptidase La. This protein, the ATP-dependent serine endopeptidase La, is induced by heat shock and other stresses in E. coli, B. subtilis, and other species. The yeast member, designated PIM1, is located in the mitochondrial matrix, required for mitochondrial function, and also induced by heat shock. [Protein fate, Degradation of proteins, peptides, and glycopeptides]
gp023	YP_009165774.1	CDD:237355	18.836	292	177	11	321	603	11	251	2.17e-22	99.1	PRK13342	PRK13342	recombination factor protein RarA; Reviewed
gp023	YP_009165774.1	CDD:237354	18.056	288	191	7	331	604	27	283	4.13e-22	100	PRK13341	PRK13341	AAA family ATPase.
gp023	YP_009165774.1	CDD:225164	17.254	284	204	9	321	601	25	280	3.15e-21	94.5	COG2255	RuvB	Holliday junction resolvasome RuvABC, ATP-dependent DNA helicase subunit [Replication, recombination and repair].
gp023	YP_009165774.1	CDD:234619	16.197	284	207	9	321	601	24	279	1.4e-20	92.2	PRK00080	ruvB	Holliday junction branch migration DNA helicase RuvB.
gp023	YP_009165774.1	CDD:223542	18.062	227	176	6	339	560	330	551	4.2e-20	93.7	COG0466	Lon	ATP-dependent Lon protease, bacterial type [Posttranslational modification, protein turnover, chaperones].
gp023	YP_009165774.1	CDD:129721	16.774	310	224	10	321	626	3	282	7.13e-20	89.9	TIGR00635	ruvB	Holliday junction DNA helicase, RuvB subunit. All proteins in this family for which functions are known are 5'-3' DNA helicases that, as part of a complex with RuvA homologs serve as a 5'-3' Holliday junction helicase. RuvA specifically binds Holliday junctions as a sandwich of two tetramers and maintains the configuration of the junction. It forms a complex with two hexameric rings of RuvB, the …
gp023	YP_009165774.1	CDD:235250	17.702	322	216	8	336	637	15	307	1.17e-19	91.4	PRK04195	PRK04195	replication factor C large subunit; Provisional
gp023	YP_009165774.1	CDD:222866	15.748	254	171	7	343	591	25	240	1.71e-19	88.7	PHA02544	44	clamp loader, small subunit; Provisional
gp023	YP_009165774.1	CDD:225165	19.178	292	183	10	321	603	23	270	2.01e-19	90.3	COG2256	RarA	Replication-associated recombination protein RarA (DNA-dependent ATPase) [Replication, recombination and repair].
gp023	YP_009165774.1	CDD:273037	15.702	242	172	7	361	592	138	357	2.26e-19	90.3	TIGR00362	DnaA	chromosomal replication initiator protein DnaA. DnaA is involved in DNA biosynthesis; initiation of chromosome replication and can also be transcription regulator. The C-terminal of the family hits the pfam bacterial DnaA (bac_dnaA) domain family. For a review, see Kaguni (2006). [DNA metabolism, DNA replication, recombination, and repair]
gp023	YP_009165774.1	CDD:223666	15.353	241	172	7	361	592	114	331	3.42e-19	89.5	COG0593	DnaA	Chromosomal replication initiation ATPase DnaA [Replication, recombination and repair].
gp023	YP_009165774.1	CDD:224391	15.385	273	181	6	342	594	24	266	3.91e-19	88.7	COG1474	CDC6	Cdc6-related protein, AAA superfamily ATPase [Replication, recombination and repair].
gp023	YP_009165774.1	CDD:234751	15.018	273	194	6	342	592	37	293	8.68e-19	87.9	PRK00411	cdc6	ORC1-type DNA replication protein.
gp023	YP_009165774.1	CDD:310239	17.84	213	147	6	321	530	23	210	1.03e-18	84.9	pfam05496	RuvB_N	Holliday junction DNA helicase ruvB N-terminus. The RuvB protein makes up part of the RuvABC revolvasome which catalyzes the resolution of Holliday junctions that arise during genetic recombination and DNA repair. Branch migration is catalyzed by the RuvB protein that is targeted to the Holliday junction by the structure specific RuvA protein. This family contains the N-terminal region of the pro…
gp023	YP_009165774.1	CDD:234667	14.463	242	175	7	361	592	100	319	3.23e-18	86.4	PRK00149	dnaA	chromosomal replication initiator protein DnaA.
gp023	YP_009165774.1	CDD:234763	18.051	277	183	6	321	594	16	251	1.12e-17	83.3	PRK00440	rfc	replication factor C small subunit; Reviewed
gp023	YP_009165774.1	CDD:274354	19.355	279	180	9	342	591	22	284	1.52e-17	83.7	TIGR02928	TIGR02928	orc1/cdc6 family replication initiation protein. Members of this protein family are found exclusively in the archaea. This set of DNA binding proteins shows homology to the origin recognition complex subunit 1/cell division control protein 6 family in eukaryotes. Several members may be found in genome and interact with each other. [DNA metabolism, DNA replication, recombination, and repair]
gp023	YP_009165774.1	CDD:278724	14.798	223	159	6	340	552	14	215	2.45e-17	80.2	pfam00308	Bac_DnaA	Bacterial dnaA protein.
gp023	YP_009165774.1	CDD:224145	20.168	238	146	10	301	517	26	240	1.22e-16	81.8	COG1224	TIP49	DNA helicase TIP49, TBP-interacting protein [Transcription].
gp023	YP_009165774.1	CDD:224140	20.423	142	110	3	324	464	63	202	6.53e-16	79.1	COG1219	ClpX	ATP-dependent protease Clp, ATPase subunit [Posttranslational modification, protein turnover, chaperones].
gp023	YP_009165774.1	CDD:336785	21.014	138	99	4	362	492	1	135	1.16e-15	73.3	pfam07728	AAA_5	AAA domain (dynein-related subfamily). This Pfam entry includes some of the AAA proteins not detected by the pfam00004 model.
gp023	YP_009165774.1	CDD:223616	17.69	277	200	9	324	592	493	749	1.25e-15	79.5	COG0542	ClpA	ATP-dependent Clp protease ATP-binding subunit ClpA [Posttranslational modification, protein turnover, chaperones].
gp023	YP_009165774.1	CDD:214361	16.151	291	189	9	321	592	178	432	5e-15	77.5	CHL00095	clpC	Clp protease ATP binding subunit
gp023	YP_009165774.1	CDD:223786	18.359	256	178	7	362	592	45	294	5.42e-15	75.6	COG0714	MoxR	MoxR-like ATPase [General function prediction only].
gp023	YP_009165774.1	CDD:235422	20.423	142	111	2	324	464	73	213	5.75e-15	76.4	PRK05342	clpX	ATP-dependent Clp protease ATP-binding subunit ClpX.
gp023	YP_009165774.1	CDD:274528	14.386	285	205	8	324	583	568	838	2.02e-14	76	TIGR03345	VI_ClpV1	type VI secretion ATPase, ClpV1 family. Members of this protein family are homologs of ClpB, an ATPase associated with chaperone-related functions. These ClpB homologs, designated ClpV1, are a key component of the bacterial pathogenicity-associated type VI secretion system. [Protein fate, Protein and peptide secretion and trafficking, Cellular processes, Pathogenesis]
gp023	YP_009165774.1	CDD:223616	18.671	316	192	7	289	580	149	423	2.69e-14	75.2	COG0542	ClpA	ATP-dependent Clp protease ATP-binding subunit ClpA [Posttranslational modification, protein turnover, chaperones].
gp023	YP_009165774.1	CDD:224401	18.71	155	113	3	362	513	107	251	4.54e-14	71.8	COG1484	DnaC	DNA replication protein DnaC [Replication, recombination and repair].
gp023	YP_009165774.1	CDD:215031	13.834	253	194	4	353	588	141	386	7.55e-14	72.9	PLN00020	PLN00020	ribulose bisphosphate carboxylase/oxygenase activase -RuBisCO activase (RCA); Provisional
gp023	YP_009165774.1	CDD:283678	28.155	103	60	4	324	424	26	116	8.64e-14	72.5	pfam06068	TIP49	TIP49 C-terminus. This family consists of the C-terminal region of several eukaryotic and archaeal RuvB-like 1 (Pontin or TIP49a) and RuvB-like 2 (Reptin or TIP49b) proteins. The N-terminal domain contains the pfam00004 domain. In zebrafish, the liebeskummer (lik) mutation, causes development of hyperplastic embryonic hearts. lik encodes Reptin, a component of a DNA-stimulated ATPase complex. Bet…
gp023	YP_009165774.1	CDD:274241	14.504	262	197	8	352	603	473	717	1.6e-13	72.9	TIGR02639	ClpA	ATP-dependent Clp protease ATP-binding subunit clpA. [Protein fate, Degradation of proteins, peptides, and glycopeptides]
gp023	YP_009165774.1	CDD:274111	13.287	286	193	9	324	591	16	264	6.72e-13	69.4	TIGR02397	dnaX_nterm	DNA polymerase III, subunit gamma and tau. This model represents the well-conserved first ~ 365 amino acids of the translation of the dnaX gene. The full-length product of the dnaX gene in the model bacterium E. coli is the DNA polymerase III tau subunit. A translational frameshift leads to early termination and a truncated protein subunit gamma, about 1/3 shorter than tau and present in roughly …
gp023	YP_009165774.1	CDD:274529	14.478	297	204	8	324	587	566	845	9.89e-13	70.2	TIGR03346	chaperone_ClpB	ATP-dependent chaperone ClpB. Members of this protein family are the bacterial ATP-dependent chaperone ClpB. This protein belongs to the AAA family, ATPases associated with various cellular activities (pfam00004). This molecular chaperone does not act as a protease, but rather serves to disaggregate misfolded and aggregated proteins. [Protein fate, Protein folding and stabilization]
gp023	YP_009165774.1	CDD:226350	14.198	324	224	11	308	592	211	519	1.29e-12	69.4	COG3829	RocR	Transcriptional regulator containing PAS, AAA-type ATPase, and DNA-binding Fis domains [Transcription, Signal transduction mechanisms].
gp023	YP_009165774.1	CDD:274241	14.671	334	214	10	324	625	183	477	2.19e-12	69.1	TIGR02639	ClpA	ATP-dependent Clp protease ATP-binding subunit clpA. [Protein fate, Degradation of proteins, peptides, and glycopeptides]
gp023	YP_009165774.1	CDD:225114	14.043	235	174	6	363	586	167	384	4.68e-12	67.5	COG2204	AtoC	DNA-binding transcriptional response regulator, NtrC family, contains REC, AAA-type ATPase, and a Fis-type DNA-binding domains [Signal transduction mechanisms].
gp023	YP_009165774.1	CDD:306894	12.648	253	196	7	355	591	52	295	9.5e-12	65.6	pfam00493	MCM	MCM2/3/5 family.
gp023	YP_009165774.1	CDD:225369	15.354	254	168	8	353	580	31	263	1.31e-11	66.4	COG2812	DnaX	DNA polymerase III, gamma/tau subunits [Replication, recombination and repair].
gp023	YP_009165774.1	CDD:225822	14.87	269	201	8	334	588	313	567	6.05e-11	64.4	COG3284	AcoR	Transcriptional regulator of acetoin/glycerol metabolism [Transcription].
gp027	YP_009165778.1	CDD:333993	42.268	291	141	5	320	610	1	264	0	611	pfam00303	Thymidylat_synt	Thymidylate synthase. This is a family of proteins that are flavin-dependent thymidylate synthases.
gp027	YP_009165778.1	CDD:223285	40.068	292	149	5	319	610	3	268	0	599	COG0207	ThyA	Thymidylate synthase [Nucleotide transport and metabolism].
gp027	YP_009165778.1	CDD:234984	40.068	292	147	6	319	610	1	264	0	595	PRK01827	thyA	thymidylate synthase; Reviewed
gp027	YP_009165778.1	CDD:240299	38.276	290	171	4	321	610	233	514	0	580	PTZ00164	PTZ00164	bifunctional dihydrofolate reductase-thymidylate synthase; Provisional
gp027	YP_009165778.1	CDD:238211	43.388	242	109	6	321	561	1	215	1.07e-162	462	cd00351	TS_Pyrimidine_HMase	Thymidylate synthase and pyrimidine hydroxymethylase: Thymidylate synthase (TS) and deoxycytidylate hydroxymethylase (dCMP-HMase) are homologs that catalyze analogous alkylation of C5 of pyrimidine nucleotides. Both enzymes are involved in the biosynthesis of DNA precursors and are active as homodimers. However, they exhibit distinct pyrimidine base specificities and differ in the details of thei…
gp027	YP_009165778.1	CDD:179181	19.748	238	141	6	325	562	17	204	6.37e-47	162	PRK00956	thyA	thymidylate synthase; Provisional
gp042	YP_009165793.1	CDD:274043	22.051	195	136	7	294	483	103	286	8.78e-59	196	TIGR02225	recomb_XerD	tyrosine recombinase XerD. The phage integrase family describes a number of recombinases with tyrosine active sites that transiently bind covalently to DNA. Many are associated with mobile DNA elements, including phage, transposons, and phase variation loci. This model represents XerD, one of two closely related chromosomal proteins along with XerC (TIGR02224). XerC and XerD are site-specific rec…
gp042	YP_009165793.1	CDD:271179	22.599	177	125	5	298	474	2	166	3.12e-57	188	cd00798	INT_XerDC_C	XerD and XerC integrases, C-terminal catalytic domains. XerDC-like integrases are involved in the site-specific integration and excision of lysogenic bacteriophage genomes, transposition of conjugative transposons, termination of chromosomal replication, and stable plasmid inheritance. They share the same fold in their catalytic domain containing six conserved active site residues and the overall…
gp042	YP_009165793.1	CDD:227308	21.111	180	128	5	307	483	127	295	2.34e-55	187	COG4974	XerD	Site-specific recombinase XerD [Replication, recombination and repair].
gp042	YP_009165793.1	CDD:334163	17.318	179	134	4	296	474	1	165	3.7e-55	182	pfam00589	Phage_integrase	Phage integrase family. Members of this family cleave DNA substrates by a series of staggered cuts, during which the protein becomes covalently linked to the DNA through a catalytic tyrosine residue at the carboxy end of the alignment. The catalytic site residues in CRE recombinase are Arg-173, His-289, Arg-292 and Tyr-324.
gp042	YP_009165793.1	CDD:234713	20.103	194	140	7	294	483	112	294	2.82e-54	184	PRK00283	xerD	tyrosine recombinase.
gp042	YP_009165793.1	CDD:234698	20.106	189	133	5	298	483	119	292	5.22e-53	181	PRK00236	xerC	site-specific tyrosine recombinase XerC; Reviewed
gp042	YP_009165793.1	CDD:274042	19.898	196	139	8	294	483	105	288	4.52e-49	170	TIGR02224	recomb_XerC	tyrosine recombinase XerC. The phage integrase family describes a number of recombinases with tyrosine active sites that transiently bind covalently to DNA. Many are associated with mobile DNA elements, including phage, transposons, and phase variation loci. This model represents XerC, one of two closely related chromosomal proteins along with XerD (TIGR02225). XerC and XerD are site-specific rec…
gp042	YP_009165793.1	CDD:271175	22.727	176	126	4	299	473	1	167	4.13e-46	158	cd00397	DNA_BRE_C	DNA breaking-rejoining enzymes, C-terminal catalytic domain. The DNA breaking-rejoining enzyme superfamily includes type IB topoisomerases and tyrosine based site-specific recombinases (integrases) that share the same fold in their catalytic domain containing conserved active site residues. The best-studied members of this diverse superfamily include Human topoisomerase I, the bacteriophage lambd…
gp042	YP_009165793.1	CDD:271177	20.442	181	121	6	295	474	4	162	3.91e-45	155	cd00796	INT_Rci_Hp1_C	Shufflon-specific DNA recombinase Rci and Bacteriophage Hp1_like integrase, C-terminal catalytic domain. Rci protein is a tyrosine recombinase specifically involved in Shufflon type of DNA rearrangement in bacteria. The shufflon of plasmid R64 consists of four invertible DNA segments which are separated and flanked by seven 19-bp repeat sequences. RCI recombinase facilitates the site-specific rec…
gp042	YP_009165793.1	CDD:271193	18.785	181	136	6	295	474	5	175	2.38e-44	154	cd01193	INT_IntI_C	Integron integrase and similar protiens, C-terminal catalytic domain. Integron integrases mediate site-specific DNA recombination between a proximal primary site (attI) and a secondary target site (attC) found within mobile gene cassettes encoding resistance or virulence factors. Unlike other site specific recombinases, the attC sites lack sequence conservation. Integron integrase exhibits broade…
gp042	YP_009165793.1	CDD:271183	22.404	183	134	6	296	477	1	176	1.67e-42	149	cd01182	INT_RitC_C_like	C-terminal catalytic domain of recombinase RitC, a component of the recombinase trio. Recombinases belonging to the RitA (also known as pAE1 due to its presence in the deletion prone region of plasmid pAE1 of Alcaligenes eutrophus H1), RitB, and RitC families are associated in a complex referred to as a Recombinase in Trio (RIT) element. These RIT elements consist of three adjacent and unidirecti…
gp042	YP_009165793.1	CDD:271185	18.079	177	122	4	299	474	1	155	3.76e-39	139	cd01185	INTN1_C_like	Integrase IntN1 of Bacteroides mobilizable transposon NBU1 and similar proteins, C-terminal catalytic domain. IntN1 is a tyrosine recombinase for the integration and excision of Bacteroides mobilizable transposon NBU1 from the host chromosome. IntN1 does not require strict homology between the recombining sites seen with other tyrosine recombinases. This family belongs to the superfamily of DNA b…
gp042	YP_009165793.1	CDD:271184	19.474	190	132	7	296	474	1	180	7.02e-38	136	cd01184	INT_C_like_1	Uncharacterized site-specific tyrosine recombinase, C-terminal catalytic domain. Tyrosine recombinase (integrase) belongs to a DNA breaking-rejoining enzyme superfamily. The catalytic domain containing six conserved active site residues. The recombination reaction involves cleavage of a single strand of a DNA duplex by nucleophilic attack of a conserved tyrosine to give a 3' phosphotyrosyl protei…
gp042	YP_009165793.1	CDD:271194	16.575	181	142	4	296	474	1	174	2.76e-32	121	cd01194	INT_C_like_4	Uncharacterized site-specific tyrosine recombinase, C-terminal catalytic domain. Tyrosine recombinase (integrase) belongs to a DNA breaking-rejoining enzyme superfamily. The catalytic domain contains six conserved active site residues. The recombination reaction involves cleavage of a single strand of a DNA duplex by nucleophilic attack of a conserved tyrosine to give a 3' phosphotyrosyl protein-…
gp042	YP_009165793.1	CDD:223655	18.785	181	130	6	296	475	126	290	2.14e-28	114	COG0582	XerC	Integrase [Replication, recombination and repair, Mobilome: prophages, transposons].
gp042	YP_009165793.1	CDD:271192	20.455	176	123	5	300	473	8	168	3.48e-27	107	cd01192	INT_C_like_3	Uncharacterized site-specific tyrosine recombinase, C-terminal catalytic domain. Tyrosine recombinase (integrase) belongs to a DNA breaking-rejoining enzyme superfamily. The catalytic domain contains six conserved active site residues. The recombination reaction involves cleavage of a single strand of a DNA duplex by nucleophilic attack of a conserved tyrosine to give a 3' phosphotyrosyl protein-…
gp042	YP_009165793.1	CDD:271178	20.942	191	127	9	296	472	1	181	1.07e-26	106	cd00797	INT_RitB_C_like	C-terminal catalytic domain of recombinase RitB, a component of the recombinase trio. Recombinases belonging to the RitA (also known as pAE1 due to its presence in the deletion prone region of plasmid pAE1 of Alcaligenes eutrophus H1), RitB, and RitC families are associated in a complex referred to as a Recombinase in Trio (RIT) element. These RIT elements consist of three adjacent and unidirecti…
gp042	YP_009165793.1	CDD:271180	21.477	149	111	4	330	475	31	176	1.15e-26	105	cd00799	INT_Cre_C	C-terminal catalytic domain of Cre recombinase (also called integrase). Cre-like recombinases are tyrosine based site specific recombinases. They belong to the superfamily of DNA breaking-rejoining enzymes, which share the same fold in their catalytic domain and the overall reaction mechanism. The bacteriophage P1 Cre recombinase maintains the circular phage replicon in a monomeric state by catal…
gp042	YP_009165793.1	CDD:235339	14.535	172	130	5	306	474	186	343	6.54e-26	108	PRK05084	xerS	site-specific tyrosine recombinase XerS; Reviewed
gp042	YP_009165793.1	CDD:271189	14.557	158	81	5	330	474	31	147	1.87e-25	101	cd01189	INT_ICEBs1_C_like	C-terminal catalytic domain of integrases from bacterial phages and conjugate transposons. This family of tyrosine based site-specific integrases is has origins in bacterial phages and conjugate transposons. One member is the integrase from Bacillus subtilis conjugative transposon ICEBs1. ICEBs1 can be excised and transfered to various recipients in response to DNA damage or high concentrations o…
gp042	YP_009165793.1	CDD:271188	16.489	188	142	6	297	480	1	177	3.23e-25	101	cd01188	INT_RitA_C_like	C-terminal catalytic domain of recombinase RitA, a component of the recombinase trio. Recombinases RitA (also known as pAE1), RitB, and RitC are encoded by three adjacent and overlapping genes. Collectively they are known as the Recombinase in Trio (RIT). This RitA family includes various bacterial integrases and integrases from the deletion-prone region of plasmid pAE1 of Alcaligenes eutrophus H…
gp042	YP_009165793.1	CDD:271181	19.136	162	114	6	315	476	12	156	1.22e-22	93.5	cd00800	INT_Lambda_C	C-terminal catalytic domain of Lambda integrase, a tyrosine-based site-specific recombinase. Lambda-type integrases catalyze site-specific integration and excision of temperate bacteriophages and other mobile genetic elements to and from the bacterial host chromosome. They are tyrosine-based site-specific recombinase and belong to the superfamily of DNA breaking-rejoining enzymes, which share the…
gp042	YP_009165793.1	CDD:271187	16.883	154	90	2	324	473	22	141	1.76e-18	81.2	cd01187	INT_tnpB_C_Tn554	Putative Transposase B from transposon Tn554, C-terminal catalytic domain. This family includes putative Transposase B from transposon Tn554. It belongs to a DNA breaking-rejoining enzyme superfamily. The catalytic domain containing six conserved active site residues. The recombination reaction involves cleavage of a single strand of a DNA duplex by nucleophilic attack of a conserved tyrosine to …
gp042	YP_009165793.1	CDD:271182	18.978	137	94	3	327	463	31	150	1.97e-18	82.4	cd00801	INT_P4_C	Bacteriophage P4 integrase, C-terminal catalytic domain. P4-like integrases are found in temperate bacteriophages, integrative plasmids, pathogenicity and symbiosis islands, and other mobile genetic elements. The P4 integrase mediates integrative and excisive site-specific recombination between two sites, called attachment sites, located on the phage genome and the bacterial chromosome. The phage…
gp042	YP_009165793.1	CDD:177633	17.614	176	126	3	301	475	182	339	6.04e-18	84.7	PHA03397	vlf-1	very late expression factor 1; Provisional
gp043	YP_009165794.1	CDD:236304	16.525	236	184	5	1175	1410	35	257	1.55e-26	116	PRK08581	PRK08581	amidase domain-containing protein.
gp043	YP_009165794.1	CDD:236304	18.079	177	137	3	741	914	31	202	2.02e-24	109	PRK08581	PRK08581	amidase domain-containing protein.
gp050	YP_009165801.1	CDD:317802	29.07	172	89	6	1121	1288	1035	1177	1.34e-29	127	pfam15449	Retinal	Retinal protein. This family of proteins is found in the photoreceptor cells of the retina. Mutations of the gene encoding this protein have been associated with retinal disorders such as retinitis pigmentosa and late-onset progressive retinal atrophy. The function of this family of proteins is unknown, but it is likely to be important in the development and function of the retina.
gp050	YP_009165801.1	CDD:214546	30	40	25	1	1672	1708	1	40	5.72e-15	69.4	smart00184	RING	Ring finger. E3 ubiquitin-protein ligase activity is intrinsic to the RING domain of c-Cbl and is likely to be a general function of this domain; Various RING fingers exhibit binding activity towards E2 ubiquitin-conjugating enzymes (Ubc' s)
gp050	YP_009165801.1	CDD:333836	30	40	25	1	1672	1708	1	40	8.61e-15	69	pfam00097	zf-C3HC4	Zinc finger, C3HC4 type (RING finger). The C3HC4 type zinc-finger (RING finger) is a cysteine-rich domain of 40 to 60 residues that coordinates two zinc ions, and has the consensus sequence: C-X2-C-X(9-39)-C-X(1-3)-H-X(2-3)-C-X2-C-X(4-48)-C-X2-C where X is any amino acid. Many proteins containing a RING finger play a key role in the ubiquitination pathway.
gp050	YP_009165801.1	CDD:338865	39.535	43	22	2	1671	1709	2	44	9.98e-15	69	pfam13639	zf-RING_2	Ring finger domain.
gp050	YP_009165801.1	CDD:339001	35	40	24	1	1672	1709	5	44	1.59e-14	68.3	pfam13920	zf-C3HC4_3	Zinc finger, C3HC4 type (RING finger).
gp050	YP_009165801.1	CDD:319362	29.545	44	25	2	1672	1709	1	44	2.81e-13	64.8	cd16448	RING-H2	H2 subclass of RING (RING-H2) fingers and its variants. The RING finger is a specialized type of Zn-finger of 40 to 60 residues that binds two atoms of zinc. It is defined by the "cross-brace" motif that chelates zinc atoms by eight amino acid residues, typically Cys or His, arranged in a characteristic spacing. Canonical RING motifs have been categorized into two major subclasses, RING-HC (C3HC4…
gp050	YP_009165801.1	CDD:319703	36.585	41	24	1	1671	1709	1	41	4.96e-13	64	cd16789	mRING-HC-C3HC5_MGRN1-like	Modified RING finger, HC subclass (C3HC5-type), found in mahogunin RING finger protein 1 (MGRN1), RING finger protein 157 (RNF157) and similar proteins. MGRN1, also known as RING finger protein 156 (RNF156), is a cytosolic E3 ubiquitin-protein ligase that inhibits signaling through the G protein-coupled melanocortin receptors-1 (MC1R), -2 (MC2R) and -4 (MC4R) via ubiquitylation-dependent and -ind…
gp050	YP_009165801.1	CDD:319363	32.5	40	23	2	1672	1708	1	39	6.12e-13	63.7	cd16449	RING-HC	HC subclass of RING (RING-HC) finger and its variants. The RING finger is a specialized type of Zn-finger of 40 to 60 residues that binds two atoms of zinc. It is defined by the "cross-brace" motif that chelates zinc atoms by eight amino acid residues, typically Cys or His, arranged in a characteristic spacing. Canonical RING motifs have been categorized into two major subclasses, RING-HC (C3HC4-…
gp050	YP_009165801.1	CDD:319443	27.5	40	27	1	1672	1709	3	42	1.43e-12	62.9	cd16529	RING-HC_RAD18	RING finger, HC subclass, found in postreplication repair protein RAD18 and similar proteins. RAD18, also known as HR18 or RING finger protein 73 (RNF73), is an E3 ubiquitin-protein ligase involved in post replication repair of UV-damaged DNA via its recruitment to stalled replication forks. It associates to the E2 ubiquitin conjugating enzyme UBE2B to form the UBE2B-RAD18 ubiquitin ligase comple…
gp050	YP_009165801.1	CDD:319375	32.558	43	25	2	1671	1709	1	43	1.5e-12	62.5	cd16461	RING-H2_EL5-like	RING finger, H2 subclass, found in rice E3 ubiquitin-protein ligase EL5 and similar proteins. EL5, also known as protein ELICITOR 5, is an E3 ubiquitin-protein ligase containing an N-terminal transmembrane domain and a C3H2C3-type RING-H2 finger that is a binding site for ubiquitin-conjugating enzyme (E2). It can be rapidly induced by N-acetylchitooligosaccharide elicitor. EL5 catalyzes polyubiqu…
gp050	YP_009165801.1	CDD:316445	32.5	40	25	1	1671	1708	1	40	1.96e-12	62.1	pfam13923	zf-C3HC4_2	Zinc finger, C3HC4 type (RING finger).
gp050	YP_009165801.1	CDD:319488	25	40	28	1	1672	1709	1	40	2.66e-12	61.7	cd16574	RING-HC_Topors	RING finger, HC subclass, found in topoisomerase I-binding arginine/serine-rich protein (Topors) and similar proteins. Topors, also known as topoisomerase I-binding RING finger protein, tumor suppressor p53- binding protein 3, or p53-binding protein 3 (p53BP3), is a ubiquitously expressed nuclear E3 ubiquitin-protein ligase that can ligate both ubiquitin and small ubiquitin-like modifier (SUMO) t…
gp050	YP_009165801.1	CDD:319371	33.333	42	25	1	1671	1709	2	43	3.4e-12	61.7	cd16457	RING-H2_BRAP2	RING finger, H2 subclass, found in BRCA1-associated protein (BRAP2) and similar proteins. BRAP2, also known as impedes mitogenic signal propagation (IMP), RING finger protein 52, or renal carcinoma antigen NY-REN-63, is a novel cytoplasmic protein interacting with the two functional nuclear localization signal (NLS) motifs of BRCA1, a nuclear protein linked to breast cancer. It also binds to the …
gp050	YP_009165801.1	CDD:319423	34.884	43	23	2	1671	1709	2	43	4.41e-12	61.3	cd16509	RING-HC_HLTF	RING finger, HC subclass, found in helicase-like transcription factor (HLTF) and similar proteins. HLTF, also known as DNA-binding protein/plasminogen activator inhibitor 1 regulator, HIP116, RING finger protein 80, SWI/SNF-related matrix-associated actin-dependent regulator of chromatin subfamily A member 3, or sucrose nonfermenting protein 2-like 3, is a yeast RAD5 homolog found in mammals. It …
gp050	YP_009165801.1	CDD:319533	29.268	41	26	1	1672	1709	3	43	4.72e-12	61.3	cd16619	mRING-HC-C4C4_TRIM37_C-VIII	Modified RING finger, HC subclass (C4C4-type), found in tripartite motif-containing protein 37 (TRIM37) and similar proteins. TRIM37, also known as mulibrey nanism protein, or MUL, is a peroxisomal E3 ubiquitin-protein ligase that is involved in the tumorigenesis of several cancer types, including pancreatic ductal adenocarcinoma (PDAC), hepatocellular carcinoma (HCC), breast cancer, and sporadic…
gp050	YP_009165801.1	CDD:319446	30	40	25	2	1672	1709	2	40	5.06e-12	61	cd16532	RING-HC_RNFT1-like	RING finger, HC subclass, found in RING finger and transmembrane domain-containing protein RNFT1, RNFT2, and similar proteins. Both RNFT1 and RNFT2 are multi-pass membrane proteins containing a C3HC4-type RING-HC finger. Their biological roles remain unclear.
gp050	YP_009165801.1	CDD:319561	33.333	42	25	1	1671	1709	1	42	5.83e-12	61	cd16647	mRING-HC-C3HC5_NEU1	Modified RING finger, HC subclass (C3HC5-type), found in neuralized-like protein NEURL1A, NEURL1B, and similar proteins. This subfamily includes Drosophila neuralized (D-neu) protein, and its two mammalian homologs, NEURL1A and NEURL1B. D-neu is a regulator of the developmentally important Notch signaling pathway. NEURL1A, also known as NEURL1, NEU, neuralized 1, or RING finger protein 67 (RNF67)…
gp050	YP_009165801.1	CDD:319387	22.727	44	29	2	1671	1709	1	44	6.46e-12	61	cd16473	RING-H2_RNF103	RING finger, H2 subclass, found in RING finger protein 103 (RNF103) and similar proteins. RNF103, also known as KF-1 or zinc finger protein 103 homolog (Zfp-103), is an endoplasmic reticulum (ER)-resident E3 ubiquitin-protein ligase that is widely expressed in many different organs, including brain, heart, kidney, spleen, and lung. It is involved in the ER-associated degradation (ERAD) pathway by…
gp050	YP_009165801.1	CDD:319368	27.907	43	27	2	1671	1709	1	43	1.19e-11	60.2	cd16454	RING-H2_PA-TM-RING	RING finger, H2 subclass, found in the PA-TM-RING ubiquitin ligase family. The PA-TM-RING family represents a group of transmembrane-type E3 ubiquitin ligases, which has been characterized by an N-terminal transient signal peptide, a PA (protease-associated) domain, a TM (transmembrane) domain, as well as a C-terminal C3H2C3-type RING-H2 finger domain. It includes RNF13, RNF167, ZNRF4 (zinc and R…
gp065	YP_009165816.1	CDD:236304	12.5	272	218	5	527	784	30	295	5.45e-35	141	PRK08581	PRK08581	amidase domain-containing protein.
gp072	YP_009165823.1	CDD:236304	12.136	206	168	3	1005	1210	130	322	1.53e-42	164	PRK08581	PRK08581	amidase domain-containing protein.
gp072	YP_009165823.1	CDD:275319	13.333	225	186	2	960	1179	70	290	7.17e-17	85.2	TIGR04526	predic_Ig_block	putative immunoglobulin-blocking virulence protein. Members of this family are putative virulence proteins of Mycoplasma and Ureaplasma species. Members share a region of sequence similarity (see TIGR04524) with protein M, a Mycoplasma genitalium protein that binds a conserved light chain region of IgG and blocks its protective function of antigen-specific binding. The seed alignment for this mod…
gp072	YP_009165823.1	CDD:236766	14.943	174	144	2	103	275	853	1023	4.72e-14	76.3	PRK10811	rne	ribonuclease E; Reviewed
gp074	YP_009165825.1	CDD:333869	20.07	284	151	8	1140	1418	46	258	1.14e-73	253	pfam00136	DNA_pol_B	DNA polymerase family B. This region of DNA polymerase B appears to consist of more than one structural domain, possibly including elongation, DNA-binding and dNTP binding activities.
gp074	YP_009165825.1	CDD:99915	18.412	277	130	8	1143	1414	8	193	2.51e-60	212	cd05532	POLBc_alpha	DNA polymerase type-B alpha subfamily catalytic domain. Three DNA-dependent DNA polymerases type B (alpha, delta, and epsilon) have been identified as essential for nuclear DNA replication in eukaryotes. DNA polymerase (Pol) alpha is almost exclusively required for the initiation of DNA replication and the priming of Okazaki fragments during elongation. In most organisms no specific repair role, …
gp074	YP_009165825.1	CDD:214691	19.466	262	133	6	1140	1393	283	474	5.48e-58	207	smart00486	POLBc	DNA polymerase type-B family. DNA polymerase alpha, delta, epsilon and zeta chain (eukaryota), DNA polymerases in archaea, DNA polymerase II in e. coli, mitochondrial DNA polymerases and and virus DNA polymerases
gp074	YP_009165825.1	CDD:222962	18.77	309	175	12	1139	1418	526	787	3.35e-53	203	PHA03036	PHA03036	DNA polymerase; Provisional
gp074	YP_009165825.1	CDD:223494	18.981	216	151	5	1207	1415	394	592	8.68e-51	193	COG0417	PolB	DNA polymerase elongation subunit (family B) [Replication, recombination and repair].
gp074	YP_009165825.1	CDD:99917	17.69	277	161	9	1147	1415	40	257	9.52e-51	186	cd05534	POLBc_zeta	DNA polymerase type-B zeta subfamily catalytic domain. DNA polymerase (Pol) zeta is a member of the eukaryotic B-family of DNA polymerases and distantly related to DNA Pol delta. Pol zeta plays a major role in translesion replication and the production of either spontaneous or induced mutations. Apart from its role in translesion replication, Pol zeta also appears to be involved in somatic hyperm…
gp074	YP_009165825.1	CDD:99919	18.677	257	123	6	1140	1395	1	172	1.12e-49	180	cd05536	POLBc_B3	DNA polymerase type-B B3 subfamily catalytic domain. Archaeal proteins that are involved in DNA replication are similar to those from eukaryotes. Some members of the archaea also possess multiple family B DNA polymerases (B1, B2 and B3). So far there is no specific function(s) has been assigned for different members of the archaea type B DNA polymerases. Phylogenetic analyses of eubacterial, arch…
gp074	YP_009165825.1	CDD:99912	23.129	147	95	2	1269	1411	56	188	4.49e-49	177	cd00145	POLBc	DNA polymerase type-B family catalytic domain. DNA-directed DNA polymerases elongate DNA by adding nucleotide triphosphate (dNTP) residues to the 5'-end of the growing chain of DNA. DNA-directed DNA polymerases are multifunctional with both synthetic (polymerase) and degradative modes (exonucleases) and play roles in the processes of DNA replication, repair, and recombination. DNA-dependent DNA p…
gp074	YP_009165825.1	CDD:240301	16.667	318	168	13	1124	1418	504	747	6.66e-49	190	PTZ00166	PTZ00166	DNA polymerase delta catalytic subunit; Provisional
gp074	YP_009165825.1	CDD:99916	18.71	155	117	3	1267	1418	61	209	8.93e-41	155	cd05533	POLBc_delta	DNA polymerase type-B delta subfamily catalytic domain. Three DNA-dependent DNA polymerases type B (alpha, delta, and epsilon) have been identified as essential for nuclear DNA replication in eukaryotes. Presently, no direct data is available regarding the strand specificity of DNA polymerase during DNA replication in vivo. However, mutation analysis supports the hypothesis that DNA polymerase de…
gp074	YP_009165825.1	CDD:235595	18.621	145	96	2	1269	1413	454	576	9.03e-35	143	PRK05762	PRK05762	DNA polymerase II; Reviewed
gp074	YP_009165825.1	CDD:99920	18.243	148	99	2	1266	1413	54	179	1.51e-34	136	cd05537	POLBc_Pol_II	DNA polymerase type-II subfamily catalytic domain. Bacteria contain five DNA polymerases (I, II, III, IV and V). DNA polymerase II (Pol II) is a prototype for the B-family of polymerases. The role of Pol II in a variety of cellular activities, such as repair of DNA damaged by UV irradiation or oxidation has been proven by genetic studies. DNA polymerase III is the main enzyme responsible for repl…
gp074	YP_009165825.1	CDD:235594	16.185	173	118	3	1233	1392	417	575	2.23e-32	135	PRK05761	PRK05761	DNA-directed DNA polymerase I.
gp074	YP_009165825.1	CDD:177369	14.286	287	213	8	1140	1421	374	632	8.13e-32	134	PHA02528	43	DNA polymerase; Provisional
gp074	YP_009165825.1	CDD:99914	16.107	149	99	3	1270	1418	57	179	1.63e-31	127	cd05531	POLBc_B2	DNA polymerase type-B B2 subfamily catalytic domain. Archaeal proteins that are involved in DNA replication are similar to those from eukaryotes. Some archaeal members also possess multiple family B DNA polymerases (B1, B2 and B3). So far there is no specific function(s) has been assigned for different members of the archaea type B DNA polymerases. Phylogenetic analyses of eubacterial, archaeal, …
gp074	YP_009165825.1	CDD:335220	16.556	151	94	7	479	619	205	333	2.38e-26	111	pfam03104	DNA_pol_B_exo1	DNA polymerase family B, exonuclease domain. This domain has 3' to 5' exonuclease activity and adopts a ribonuclease H type fold.
gp074	YP_009165825.1	CDD:223494	18.852	122	75	4	498	619	203	300	1.81e-24	110	COG0417	PolB	DNA polymerase elongation subunit (family B) [Replication, recombination and repair].
gp074	YP_009165825.1	CDD:99918	15.926	270	184	5	1161	1402	95	349	2.84e-24	109	cd05535	POLBc_epsilon	DNA polymerase type-B epsilon subfamily catalytic domain. Three DNA-dependent DNA polymerases type B (alpha, delta, and epsilon) have been identified as essential for nuclear DNA replication in eukaryotes. DNA polymerase (Pol) epsilon has been proposed to play a role in elongation of the leading strand during DNA replication. Pol epsilon might also have a role in DNA repair. The structure of pol …
gp074	YP_009165825.1	CDD:176646	17.355	121	78	4	499	619	56	154	1.74e-17	82	cd05160	DEDDy_DNA_polB_exo	DEDDy 3'-5' exonuclease domain of family-B DNA polymerases. The 3'-5' exonuclease domain of family-B DNA polymerases. This domain has a fundamental role in reducing polymerase errors and is involved in proofreading activity. Family-B DNA polymerases contain an N-terminal DEDDy DnaQ-like exonuclease domain in the same polypeptide chain as the polymerase domain, similar to family-A DNA polymerases.…
gp074	YP_009165825.1	CDD:99827	18.981	216	115	8	473	676	18	185	7.94e-17	79.7	cd05784	DNA_polB_II_exo	DEDDy 3'-5' exonuclease domain of Escherichia coli DNA polymerase II and similar bacterial family-B DNA polymerases. The 3'-5' exonuclease domain of Escherichia coli DNA polymerase II (Pol II) and similar bacterial proteins. Pol II is a family-B DNA polymerase. Family-B DNA polymerases contain an N-terminal DEDDy DnaQ-like exonuclease domain in the same polypeptide chain as the polymerase domain,…
gp074	YP_009165825.1	CDD:99822	15.748	127	82	5	479	601	44	149	4.85e-15	75.1	cd05779	DNA_polB_epsilon_exo	DEDDy 3'-5' exonuclease domain of eukaryotic DNA polymerase epsilon, a family-B DNA polymerase. The 3'-5' exonuclease domain of eukaryotic DNA polymerase epsilon. DNA polymerase epsilon is a family-B DNA polymerase with a catalytic subunit that contains a DEDDy-type DnaQ-like 3'-5' exonuclease domain. It is one of the three DNA-dependent type B DNA polymerases (alpha and delta are the other two) …
gp074	YP_009165825.1	CDD:214691	14.573	199	136	6	455	642	19	194	8.22e-15	78.5	smart00486	POLBc	DNA polymerase type-B family. DNA polymerase alpha, delta, epsilon and zeta chain (eukaryota), DNA polymerases in archaea, DNA polymerase II in e. coli, mitochondrial DNA polymerases and and virus DNA polymerases
gp074	YP_009165825.1	CDD:235595	19	200	124	7	492	685	189	356	1.94e-14	78.2	PRK05762	PRK05762	DNA polymerase II; Reviewed
gp074	YP_009165825.1	CDD:99820	14.493	138	84	5	494	619	59	174	2.82e-14	73.5	cd05777	DNA_polB_delta_exo	DEDDy 3'-5' exonuclease domain of eukaryotic DNA polymerase delta, a family-B DNA polymerase. The 3'-5' exonuclease domain of eukaryotic DNA polymerase delta. DNA polymerase delta is a family-B DNA polymerase with a catalytic subunit that contains a DEDDy-type DnaQ-like 3'-5' exonuclease domain. It is one of the three DNA-dependent type B DNA polymerases (alpha and epsilon are the other two) that…
gp074	YP_009165825.1	CDD:99916	16.667	78	55	4	1142	1216	2	72	1.48e-13	73.9	cd05533	POLBc_delta	DNA polymerase type-B delta subfamily catalytic domain. Three DNA-dependent DNA polymerases type B (alpha, delta, and epsilon) have been identified as essential for nuclear DNA replication in eukaryotes. Presently, no direct data is available regarding the strand specificity of DNA polymerase during DNA replication in vivo. However, mutation analysis supports the hypothesis that DNA polymerase de…
gp074	YP_009165825.1	CDD:99912	21.25	80	61	2	1143	1220	3	82	1.65e-12	69.7	cd00145	POLBc	DNA polymerase type-B family catalytic domain. DNA-directed DNA polymerases elongate DNA by adding nucleotide triphosphate (dNTP) residues to the 5'-end of the growing chain of DNA. DNA-directed DNA polymerases are multifunctional with both synthetic (polymerase) and degradative modes (exonucleases) and play roles in the processes of DNA replication, repair, and recombination. DNA-dependent DNA p…
gp074	YP_009165825.1	CDD:99824	17.829	129	82	4	491	619	33	137	2.14e-12	67	cd05781	DNA_polB_B3_exo	DEDDy 3'-5' exonuclease domain of Sulfurisphaera ohwakuensis DNA polymerase B3 and similar archaeal family-B DNA polymerases. The 3'-5' exonuclease domain of archaeal proteins with similarity to Sulfurisphaera ohwakuensis DNA polymerase B3. B3 is a family-B DNA polymerase. Family-B DNA polymerases contain an N-terminal DEDDy DnaQ-like exonuclease domain in the same polypeptide chain as the polyme…
gp074	YP_009165825.1	CDD:240301	17.391	138	80	6	494	619	318	433	4.22e-12	70.5	PTZ00166	PTZ00166	DNA polymerase delta catalytic subunit; Provisional
gp085	YP_009165836.1	CDD:224429	23.077	65	50	0	33	97	5	69	4.79e-16	70.6	COG1512	YgcG	Uncharacterized membrane protein YgcG, contains a TPM-fold domain [Function unknown].
gp086	YP_009165837.1	CDD:339570	21.739	69	44	2	22	88	99	159	1.43e-11	62.5	pfam16009	DUF4779	Domain of unknown function (DUF4779). This family of proteins is functionally uncharacterized. This family of proteins is found in eukaryotes. Proteins in this family are typically between 234 and 351 amino acids in length.
gp086	YP_009165837.1	CDD:339570	23.288	73	54	1	35	105	5	77	9.78e-11	59.8	pfam16009	DUF4779	Domain of unknown function (DUF4779). This family of proteins is functionally uncharacterized. This family of proteins is found in eukaryotes. Proteins in this family are typically between 234 and 351 amino acids in length.
gp087	YP_009165838.1	CDD:274009	18.462	260	200	5	134	382	207	465	2.91e-16	81.8	TIGR02169	SMC_prok_A	chromosome segregation protein SMC, primarily archaeal type. SMC (structural maintenance of chromosomes) proteins bind DNA and act in organizing and segregating chromosomes for partition. SMC proteins are found in bacteria, archaea, and eukaryotes. It is found in a single copy and is homodimeric in prokaryotes, but six paralogs (excluded from this family) are found in eukarotes, where SMC protein…
gp087	YP_009165838.1	CDD:274009	8.75	240	209	3	135	368	286	521	2.83e-14	75.6	TIGR02169	SMC_prok_A	chromosome segregation protein SMC, primarily archaeal type. SMC (structural maintenance of chromosomes) proteins bind DNA and act in organizing and segregating chromosomes for partition. SMC proteins are found in bacteria, archaea, and eukaryotes. It is found in a single copy and is homodimeric in prokaryotes, but six paralogs (excluded from this family) are found in eukarotes, where SMC protein…
gp087	YP_009165838.1	CDD:314924	12.134	239	203	4	144	376	293	530	5.23e-14	74.5	pfam12128	DUF3584	Protein of unknown function (DUF3584). This protein is found in bacteria and eukaryotes. Proteins in this family are typically between 943 to 1234 amino acids in length. This family contains a P-loop motif suggesting it is a nucleotide binding protein. It may be involved in replication.
gp087	YP_009165838.1	CDD:274009	11.066	244	206	3	144	376	195	438	2.53e-13	72.6	TIGR02169	SMC_prok_A	chromosome segregation protein SMC, primarily archaeal type. SMC (structural maintenance of chromosomes) proteins bind DNA and act in organizing and segregating chromosomes for partition. SMC proteins are found in bacteria, archaea, and eukaryotes. It is found in a single copy and is homodimeric in prokaryotes, but six paralogs (excluded from this family) are found in eukarotes, where SMC protein…
gp087	YP_009165838.1	CDD:274009	13.462	260	198	3	144	376	759	1018	1.19e-12	70.3	TIGR02169	SMC_prok_A	chromosome segregation protein SMC, primarily archaeal type. SMC (structural maintenance of chromosomes) proteins bind DNA and act in organizing and segregating chromosomes for partition. SMC proteins are found in bacteria, archaea, and eukaryotes. It is found in a single copy and is homodimeric in prokaryotes, but six paralogs (excluded from this family) are found in eukarotes, where SMC protein…
gp087	YP_009165838.1	CDD:274009	12.8	250	217	1	125	374	671	919	1.68e-11	66.4	TIGR02169	SMC_prok_A	chromosome segregation protein SMC, primarily archaeal type. SMC (structural maintenance of chromosomes) proteins bind DNA and act in organizing and segregating chromosomes for partition. SMC proteins are found in bacteria, archaea, and eukaryotes. It is found in a single copy and is homodimeric in prokaryotes, but six paralogs (excluded from this family) are found in eukarotes, where SMC protein…
gp087	YP_009165838.1	CDD:274009	11.416	219	177	3	141	345	313	528	8.34e-11	64.1	TIGR02169	SMC_prok_A	chromosome segregation protein SMC, primarily archaeal type. SMC (structural maintenance of chromosomes) proteins bind DNA and act in organizing and segregating chromosomes for partition. SMC proteins are found in bacteria, archaea, and eukaryotes. It is found in a single copy and is homodimeric in prokaryotes, but six paralogs (excluded from this family) are found in eukarotes, where SMC protein…
gp088	YP_009165839.1	CDD:223076	26.22	164	97	10	120	276	51	197	4.05e-65	201	PHA03399	pif3	per os infectivity factor 3; Provisional
gp095	YP_009165846.1	CDD:334188	25	88	56	3	551	638	1	78	6.15e-31	116	pfam00645	zf-PARP	Poly(ADP-ribose) polymerase and DNA-Ligase Zn-finger region. Poly(ADP-ribose) polymerase is an important regulatory component of the cellular response to DNA damage. The amino-terminal region of Poly(ADP-ribose) polymerase consists of two PARP-type zinc fingers. This region acts as a DNA nick sensor.
gp095	YP_009165846.1	CDD:273147	16.766	167	93	4	782	945	2	125	7.91e-31	128	TIGR00574	dnl1	DNA ligase I, ATP-dependent (dnl1). All proteins in this family with known functions are ATP-dependent DNA ligases. Functions include DNA repair, DNA replication, and DNA recombination (or any process requiring ligation of two single-stranded DNA sections). This family is based on the phylogenomic analysis of JA Eisen (1999, Ph.D. Thesis, Stanford University). [DNA metabolism, DNA replication, re…
gp095	YP_009165846.1	CDD:335865	14.465	159	89	4	780	935	54	168	1.55e-20	89.5	pfam04675	DNA_ligase_A_N	DNA ligase N-terminus. This region is found in many but not all ATP-dependent DNA ligase enzymes (EC:6.5.1.1). It is thought to be involved in DNA binding and in catalysis. In human DNA ligase I, and in Saccharomyces cerevisiae, this region was necessary for catalysis, and separated from the amino terminus by targeting elements. In vaccinia virus this region was not essential for catalysis, but d…
gp095	YP_009165846.1	CDD:234900	14.286	168	96	5	784	945	60	185	9.71e-19	91	PRK01109	PRK01109	ATP-dependent DNA ligase; Provisional
gp095	YP_009165846.1	CDD:313469	17.45	149	112	3	339	487	69	206	5.22e-11	66	pfam10243	MIP-T3	Microtubule-binding protein MIP-T3. This protein, which interacts with both microtubules and TRAF3 (tumor necrosis factor receptor-associated factor 3), is conserved from worms to humans. The N-terminal region is the microtubule binding domain and is well-conserved; the C-terminal 100 residues, also well-conserved, constitute the coiled-coil region which binds to TRAF3. The central region of the …
gp101	YP_009165852.1	CDD:307247	24.83	294	142	10	1606	1897	248	464	3.27e-71	247	pfam01019	G_glu_transpept	Gamma-glutamyltranspeptidase.
gp101	YP_009165852.1	CDD:223482	22.17	212	108	8	1688	1897	344	500	2.04e-66	234	COG0405	Ggt	Gamma-glutamyltranspeptidase [Amino acid transport and metabolism].
gp101	YP_009165852.1	CDD:223482	27.059	170	97	8	213	370	128	282	4.78e-58	210	COG0405	Ggt	Gamma-glutamyltranspeptidase [Amino acid transport and metabolism].
gp101	YP_009165852.1	CDD:307247	21.893	169	106	6	213	370	94	247	1.92e-53	195	pfam01019	G_glu_transpept	Gamma-glutamyltranspeptidase.
gp101	YP_009165852.1	CDD:223482	28.696	115	66	3	22	125	18	127	9.44e-31	128	COG0405	Ggt	Gamma-glutamyltranspeptidase [Amino acid transport and metabolism].
gp101	YP_009165852.1	CDD:307247	30.612	98	55	3	36	125	1	93	2.96e-28	120	pfam01019	G_glu_transpept	Gamma-glutamyltranspeptidase.
gp101	YP_009165852.1	CDD:275316	10.284	457	389	4	863	1303	2	453	3.46e-14	77.2	TIGR04523	Mplasa_alph_rch	helix-rich Mycoplasma protein. Members of this family occur strictly within a subset of Mycoplasma species. Members average 750 amino acids in length, including signal peptide. Sequences are predicted (Jpred 3) to be almost entirely alpha-helical. These sequences show strong periodicity (consistent with long alpha helical structures) and low complexity rich in D,E,N,Q, and K. Genes encoding these…
gp103	YP_009165854.1	CDD:236766	13.235	136	111	1	298	433	905	1033	9.67e-21	95.7	PRK10811	rne	ribonuclease E; Reviewed
gp106	YP_009165857.1	CDD:334947	20.408	98	72	2	135	231	2	94	2.68e-40	141	pfam02498	Bro-N	BRO family, N-terminal domain. This family includes the N-terminus of baculovirus BRO and ALI motif proteins. The function of BRO proteins is unknown. It has been suggested that BRO-A and BRO-C are DNA binding proteins that influence host DNA replication and/or transcription. This Pfam domain does not include the characteristic invariant alanine, leucine, isoleucine motif of the ALI proteins.
gp106	YP_009165857.1	CDD:226144	18.079	177	126	5	117	290	4	164	4.68e-38	138	COG3617	COG3617	Prophage antirepressor [Mobilome: prophages, transposons].
gp106	YP_009165857.1	CDD:214989	24.742	97	62	2	135	231	2	87	3.01e-32	118	smart01040	Bro-N	BRO family, N-terminal domain. This family includes the N-terminus of baculovirus BRO and ALI motif proteins. The function of BRO proteins is unknown. It has been suggested that BRO-A and BRO-C are DNA binding proteins that influence host DNA replication and/or transcription. This Pfam domain does not include the characteristic invariant alanine, leucine, isoleucine motif of the ALI proteins.
gp106	YP_009165857.1	CDD:307549	17.045	176	136	3	247	419	1	169	5.49e-11	60.9	pfam01442	Apolipoprotein	Apolipoprotein A1/A4/E domain. These proteins contain several 22 residue repeats which form a pair of alpha helices. This family includes: Apolipoprotein A-I. Apolipoprotein A-IV. Apolipoprotein E.
gp106	YP_009165859.1	CDD:334947	20	100	74	2	134	232	2	96	6.76e-43	148	pfam02498	Bro-N	BRO family, N-terminal domain. This family includes the N-terminus of baculovirus BRO and ALI motif proteins. The function of BRO proteins is unknown. It has been suggested that BRO-A and BRO-C are DNA binding proteins that influence host DNA replication and/or transcription. This Pfam domain does not include the characteristic invariant alanine, leucine, isoleucine motif of the ALI proteins.
gp106	YP_009165859.1	CDD:226144	16.418	134	95	4	121	253	9	126	1.76e-41	147	COG3617	COG3617	Prophage antirepressor [Mobilome: prophages, transposons].
gp106	YP_009165859.1	CDD:214989	20.202	99	68	3	134	232	2	89	4.33e-30	112	smart01040	Bro-N	BRO family, N-terminal domain. This family includes the N-terminus of baculovirus BRO and ALI motif proteins. The function of BRO proteins is unknown. It has been suggested that BRO-A and BRO-C are DNA binding proteins that influence host DNA replication and/or transcription. This Pfam domain does not include the characteristic invariant alanine, leucine, isoleucine motif of the ALI proteins.
gp106	YP_009165859.1	CDD:307549	22.759	145	109	1	258	399	26	170	1.45e-11	62.4	pfam01442	Apolipoprotein	Apolipoprotein A1/A4/E domain. These proteins contain several 22 residue repeats which form a pair of alpha helices. This family includes: Apolipoprotein A-I. Apolipoprotein A-IV. Apolipoprotein E.
gp106	YP_009165859.1	CDD:307549	19.632	163	124	2	260	415	2	164	8.12e-11	60.1	pfam01442	Apolipoprotein	Apolipoprotein A1/A4/E domain. These proteins contain several 22 residue repeats which form a pair of alpha helices. This family includes: Apolipoprotein A-I. Apolipoprotein A-IV. Apolipoprotein E.
gp106	YP_009165861.1	CDD:226144	17.416	178	109	5	116	292	2	142	3.83e-51	170	COG3617	COG3617	Prophage antirepressor [Mobilome: prophages, transposons].
gp106	YP_009165861.1	CDD:334947	28.866	97	63	2	136	230	2	94	2.5e-41	142	pfam02498	Bro-N	BRO family, N-terminal domain. This family includes the N-terminus of baculovirus BRO and ALI motif proteins. The function of BRO proteins is unknown. It has been suggested that BRO-A and BRO-C are DNA binding proteins that influence host DNA replication and/or transcription. This Pfam domain does not include the characteristic invariant alanine, leucine, isoleucine motif of the ALI proteins.
gp106	YP_009165861.1	CDD:214989	22.222	99	65	2	132	230	1	87	8.98e-37	129	smart01040	Bro-N	BRO family, N-terminal domain. This family includes the N-terminus of baculovirus BRO and ALI motif proteins. The function of BRO proteins is unknown. It has been suggested that BRO-A and BRO-C are DNA binding proteins that influence host DNA replication and/or transcription. This Pfam domain does not include the characteristic invariant alanine, leucine, isoleucine motif of the ALI proteins.
gp113	YP_009165864.1	CDD:235124	17.518	137	99	3	329	451	67	203	2.26e-23	100	PRK03427	ZipA	cell division protein ZipA; Provisional
gp114	YP_009165865.1	CDD:178056	41.804	909	392	15	6	876	2	811	0	1120	PLN02437	PLN02437	ribonucleoside--diphosphate reductase large subunit
gp114	YP_009165865.1	CDD:235966	30.919	925	477	19	6	877	150	965	0	1101	PRK07207	PRK07207	ribonucleoside-diphosphate reductase subunit alpha.
gp114	YP_009165865.1	CDD:335131	41.385	592	276	8	259	849	1	522	0	941	pfam02867	Ribonuc_red_lgC	Ribonucleotide reductase, barrel domain.
gp114	YP_009165865.1	CDD:274170	33.936	719	366	11	142	853	1	617	0	901	TIGR02506	NrdE_NrdA	ribonucleoside-diphosphate reductase, alpha subunit. This model represents the alpha (large) chain of the class I ribonucleotide reductase (RNR). RNR's are responsible for the conversion of the ribose sugar of RNA into the deoxyribose sugar of DNA. This is the rate-limiting step of DNA biosynthesis. Class I RNR's generate the required radical (on tyrosine) via a "non-heme" iron cofactor which res…
gp114	YP_009165865.1	CDD:223287	26.316	855	402	18	46	877	2	651	0	871	COG0209	NrdA	Ribonucleotide reductase alpha subunit [Nucleotide transport and metabolism].
gp114	YP_009165865.1	CDD:181649	24.612	902	501	26	7	877	4	757	0	848	PRK09103	PRK09103	ribonucleoside-diphosphate reductase subunit alpha.
gp114	YP_009165865.1	CDD:274168	24.604	695	399	17	168	859	3	575	0	827	TIGR02504	NrdJ_Z	ribonucleoside-diphosphate reductase, adenosylcobalamin-dependent. This model represents a group of adenosylcobalamin(B12)-dependent ribonucleotide reductases (Class II RNRs) related to the characterized species from Pyrococcus, Thermoplasma, Corynebacterium, and Deinococcus. RNR's are responsible for the conversion of the ribose sugar of RNA into the deoxyribose sugar of DNA. This is the rate-li…
gp114	YP_009165865.1	CDD:236330	22.418	736	407	16	138	871	10	583	0	810	PRK08665	PRK08665	vitamin B12-dependent ribonucleotide reductase.
gp114	YP_009165865.1	CDD:236378	24.062	773	377	21	131	877	13	601	0	689	PRK09102	PRK09102	ribonucleoside-diphosphate reductase subunit alpha.
gp114	YP_009165865.1	CDD:153089	27.219	507	269	9	229	733	1	409	0	666	cd02888	RNR_II_dimer	Class II ribonucleotide reductase, dimeric form. Ribonucleotide reductase (RNR) catalyzes the reductive synthesis of deoxyribonucleotides from their corresponding ribonucleotides. It provides the precursors necessary for DNA synthesis. RNRs are separated into three classes based on their metallocofactor usage. Class I RNRs, found in eukaryotes, bacteria, and bacteriophage, use a diiron-tyrosyl ra…
gp114	YP_009165865.1	CDD:235828	20.296	675	420	18	222	862	112	702	0	665	PRK06556	PRK06556	vitamin B12-dependent ribonucleotide reductase; Validated
gp114	YP_009165865.1	CDD:153088	38.085	449	163	6	184	627	1	339	0	626	cd01679	RNR_I	Class I ribonucleotide reductase. Ribonucleotide reductase (RNR) catalyzes the reductive synthesis of deoxyribonucleotides from their corresponding ribonucleotides. It provides the precursors necessary for DNA synthesis. RNRs are separated into three classes based on their metallocofactor usage. Class I RNRs, found in eukaryotes, bacteria, and many viruses, use a diiron-tyrosyl radical. Class II …
gp114	YP_009165865.1	CDD:236049	17.068	457	278	13	369	798	395	777	4.27e-96	326	PRK07562	PRK07562	vitamin B12-dependent ribonucleotide reductase.
gp114	YP_009165865.1	CDD:153088	44.231	156	56	3	698	852	335	460	2.53e-66	228	cd01679	RNR_I	Class I ribonucleotide reductase. Ribonucleotide reductase (RNR) catalyzes the reductive synthesis of deoxyribonucleotides from their corresponding ribonucleotides. It provides the precursors necessary for DNA synthesis. RNRs are separated into three classes based on their metallocofactor usage. Class I RNRs, found in eukaryotes, bacteria, and many viruses, use a diiron-tyrosyl radical. Class II …
gp114	YP_009165865.1	CDD:236049	16.667	342	209	14	144	431	51	370	1.01e-57	214	PRK07562	PRK07562	vitamin B12-dependent ribonucleotide reductase.
gp114	YP_009165865.1	CDD:334002	26.05	119	48	2	138	256	1	79	7.31e-30	111	pfam00317	Ribonuc_red_lgN	Ribonucleotide reductase, all-alpha domain.
gp114	YP_009165865.1	CDD:335348	21.348	89	65	2	6	93	2	86	2.81e-25	99.2	pfam03477	ATP-cone	ATP cone domain.
gp114	YP_009165865.1	CDD:153089	25.455	55	40	1	798	851	409	463	2.24e-19	91.1	cd02888	RNR_II_dimer	Class II ribonucleotide reductase, dimeric form. Ribonucleotide reductase (RNR) catalyzes the reductive synthesis of deoxyribonucleotides from their corresponding ribonucleotides. It provides the precursors necessary for DNA synthesis. RNRs are separated into three classes based on their metallocofactor usage. Class I RNRs, found in eukaryotes, bacteria, and bacteriophage, use a diiron-tyrosyl ra…
gp114	YP_009165865.1	CDD:236436	15.054	93	72	2	5	94	3	91	4.03e-18	88.4	PRK09263	PRK09263	anaerobic ribonucleoside triphosphate reductase; Provisional
gp114	YP_009165865.1	CDD:236049	18.182	132	89	4	747	863	800	927	6.06e-17	85	PRK07562	PRK07562	vitamin B12-dependent ribonucleotide reductase.
gp114	YP_009165865.1	CDD:153083	14.851	202	105	5	427	627	173	308	9.99e-17	82.3	cd00576	RNR_PFL	Ribonucleotide reductase and Pyruvate formate lyase. Ribonucleotide reductase (RNR) and pyruvate formate lyase (PFL) are believed to have diverged from a common ancestor. They have a structurally similar ten-stranded alpha-beta barrel domain that hosts the active site, and are radical enzymes. RNRs are found in all organisms and provide the only mechanism by which nucleotides are converted to deo…
gp114	YP_009165865.1	CDD:235937	16.304	92	67	2	6	91	4	91	4.66e-16	81.9	PRK07111	PRK07111	anaerobic ribonucleoside triphosphate reductase; Provisional
gp114	YP_009165865.1	CDD:236212	16.667	90	66	3	6	91	4	88	5.8e-15	78	PRK08270	PRK08270	ribonucleoside triphosphate reductase.
gp114	YP_009165865.1	CDD:234774	10	90	73	3	7	92	51	136	8.19e-15	71.9	PRK00464
gp114	YP_009165865.1	CDD:224246	10	90	73	3	7	92	51	136	8.6e-14	68.8	COG1327	NrdR	Transcriptional regulator NrdR, contains Zn-ribbon and ATP-cone domains [Transcription].
gp114	YP_009165865.1	CDD:224247	12.281	171	111	6	5	144	3	165	2.85e-11	66.1	COG1328	NrdD	Anaerobic ribonucleoside-triphosphate reductase [Nucleotide transport and metabolism].
gp122	YP_009165873.1	CDD:224000	16.848	184	124	6	295	468	960	1124	8.16e-49	179	COG1074	RecB	ATP-dependent exoDNAse (exonuclease V) beta subunit (contains helicase and exonuclease domains) [Replication, recombination and repair].
gp122	YP_009165873.1	CDD:273172	15.196	204	126	8	292	468	861	1044	1.71e-33	134	TIGR00609	recB	exodeoxyribonuclease V, beta subunit. The RecBCD holoenzyme is a multifunctional nuclease with potent ATP-dependent exodeoxyribonuclease activity. Ejection of RecD, as occurs at chi recombinational hotspots, cripples exonuclease activity in favor of recombinagenic helicase activity. All proteins in this family for which functions are known are DNA-DNA helicases that are used as part of an exonucl…
gp122	YP_009165873.1	CDD:236784	13.776	196	128	8	295	468	952	1128	7.01e-32	129	PRK10876	recB	exonuclease V subunit beta; Provisional
gp122	YP_009165873.1	CDD:274298	14.835	182	123	5	295	468	964	1121	1.24e-14	76	TIGR02784	addA_alphas	double-strand break repair helicase AddA, alphaproteobacterial type. AddAB, also called RexAB, substitutes for RecBCD in several bacterial lineages. These DNA recombination proteins act before synapse and are particularly important for DNA repair of double-stranded breaks by homologous recombination. The term AddAB is used broadly, with AddA homologous between the alphaproteobacteria (as modeled …
gp122	YP_009165873.1	CDD:274299	14.216	204	129	8	290	467	1032	1215	2.99e-13	71.7	TIGR02785	addA_Gpos	helicase-exonuclease AddAB, AddA subunit, Firmicutes type. AddAB, also called RexAB, substitutes for RecBCD in several bacterial lineages. These DNA recombination proteins act before synapse and are particularly important for DNA repair of double-stranded breaks by homologous recombination. The term AddAB is used broadly, with AddA homologous between the Firmicutes (as modeled here) and the alpha…
gp133	YP_009165884.1	CDD:334947	26.744	86	58	4	27	110	13	95	4.02e-34	114	pfam02498	Bro-N	BRO family, N-terminal domain. This family includes the N-terminus of baculovirus BRO and ALI motif proteins. The function of BRO proteins is unknown. It has been suggested that BRO-A and BRO-C are DNA binding proteins that influence host DNA replication and/or transcription. This Pfam domain does not include the characteristic invariant alanine, leucine, isoleucine motif of the ALI proteins.
gp133	YP_009165884.1	CDD:214989	17.778	90	65	3	22	110	7	88	7.22e-27	95.8	smart01040	Bro-N	BRO family, N-terminal domain. This family includes the N-terminus of baculovirus BRO and ALI motif proteins. The function of BRO proteins is unknown. It has been suggested that BRO-A and BRO-C are DNA binding proteins that influence host DNA replication and/or transcription. This Pfam domain does not include the characteristic invariant alanine, leucine, isoleucine motif of the ALI proteins.
gp133	YP_009165884.1	CDD:226144	15.385	104	75	4	12	114	16	107	6.95e-24	90.8	COG3617	COG3617	Prophage antirepressor [Mobilome: prophages, transposons].
gp143	YP_009165894.1	CDD:350024	19.298	57	44	1	262	318	118	172	8.29e-20	87.3	cd18580	ABC_6TM_ABCC_D2	Six-transmembrane helical domain 2 (TMD2) of the ABC transporters, subfamily C. This group represents the six-transmembrane domain 2 (TMD2) of the ABC transporters that belong to the ABCC subfamily, such as the sulphonylurea receptors SUR1/2 (ABCC8), the cystic fibrosis transmembrane conductance regulator (CFTR, ABCC7), Multidrug-Resistance associated Proteins (MRP1-9), VMR1 (vacuolar multidrug r…
gp143	YP_009165894.1	CDD:350047	25.333	75	53	2	242	315	99	171	1.05e-15	75.8	cd18603	ABC_6TM_MRP1_2_3_6_D2_like	Six-transmembrane helical domain 2 (TMD2) of multidrug resistance-associated proteins (MRPs) 1, 2, 3 and 6. This group represents the six-transmembrane domain 2 (TMD2) of multidrug resistance-associated proteins (MRPs) 1, 2, 3 and 6, all of which are belonging to the subfamily C of the ATP-binding cassette (ABC) transporter superfamily. The MRP subfamily (ABCC subfamily) is composed of 13 members…
gp143	YP_009165894.1	CDD:350043	11.321	53	45	1	263	315	138	188	2.13e-11	63.1	cd18599	ABC_6TM_MRP5_8_9_D2	Six-transmembrane helical domain 2 (TMD2) of multidrug resistance-associated proteins (MRPs) 5, 8, and 9. This group represents the six-transmembrane domain 2 (TMD2) of multidrug resistance-associated proteins (MRPs) 5, 8, and 9, all of which are belonging to the subfamily C of the ATP-binding cassette (ABC) transporter superfamily. The MRP subfamily (ABCC subfamily) is composed of 13 members, of…
gp143	YP_009165894.1	CDD:350046	11.628	43	36	1	273	315	140	180	2.85e-11	62.7	cd18602	ABC_6TM_SUR1_D2_like	Six-transmembrane helical domain 2 (TMD2) of the sulphonylurea receptors SUR1/2. This group represents the six-transmembrane domain 2 (TMD2) of the sulphonylurea receptors SUR1/2 (ABCC8), which function as a modulator of ATP-sensitive potassium channels and insulin release, and belong to the ABCC subfamily. The ATP-sensitive (K-ATP) channel is an octameric complex of four pore-forming Kir6.2 subu…
gp152	YP_009165903.1	CDD:259791	36.364	33	21	0	845	877	11	43	1.92e-22	89.7	cd00656	Zn-ribbon	C-terminal zinc ribbon domain of RNA polymerase intrinsic transcript cleavage subunit. The homologous C-terminal zinc ribbon domains of subunits A12.2, Rpb9, and C11 in RNA Polymerases (Pol) I, II, and III, respectively are required for intrinsic transcript cleavage. TFS is a related archaeal protein that is involved in RNA cleavage by archaeal polymerase. These proteins have two zinc-binding bet…
gp152	YP_009165903.1	CDD:259795	36.364	33	21	0	845	877	11	43	2.03e-22	89.7	cd10511	Zn-ribbon_TFS	C-terminal zinc ribbon domain of archaeal Transcription Factor S (TFS). TFS is an archaeal protein that stimulates the intrinsic cleavage activity of archaeal RNA polymerase. TFS C-terminal domain shows sequence similarity to the homologous C-terminal zinc ribbon domain of subunits A12.2, Rpb9, and C11 in eukaryotic RNA Polymerases (Pol) I, II, and III, respectively and domain III of TFIIS. TFS i…
gp152	YP_009165903.1	CDD:334384	39.394	33	20	0	845	877	5	37	5.02e-21	85.9	pfam01096	TFIIS_C	Transcription factor S-II (TFIIS).
gp152	YP_009165903.1	CDD:128717	33.333	33	22	0	845	877	5	37	1.25e-20	84.7	smart00440	ZnF_C2C2	C2C2 Zinc finger. Nucleic-acid-binding motif in transcriptional elongation factor TFIIS and RNA polymerases.
gp152	YP_009165903.1	CDD:224510	33.333	33	22	0	845	877	77	109	2.92e-20	85.9	COG1594	RPB9	DNA-directed RNA polymerase, subunit M/Transcription elongation factor TFIIS [Transcription].
gp152	YP_009165903.1	CDD:259794	39.394	33	20	0	845	877	11	43	5.27e-20	82.8	cd10509	Zn-ribbon_RPC11	C-terminal zinc ribbon domain of RPC11 subunit of RNA polymerase III. The C-terminal zinc ribbon domain (C-ribbon) of subunit C11 (Zn-ribbon_RPC11) in RNA polymerase (Pol) III is required for intrinsic transcript cleavage. RPC11 is also involved in Pol III termination. Eukaryote genomes are transcribed by three nuclear RNA polymerases (Pol I, II and III) that share some subunits. RPC11 has strong…
gp152	YP_009165903.1	CDD:259792	42.424	33	19	0	845	877	11	43	1.65e-19	81.6	cd10507	Zn-ribbon_RPA12	C-terminal zinc ribbon domain of RPA12 subunit of RNA polymerase I. The C-terminal zinc ribbon domain (C-ribbon) of subunit A12 (Zn-ribbon_RPA12) in RNA polymerase (Pol) I is involved in intrinsic transcript cleavage. Eukaryote genomes are transcribed by three nuclear RNA polymerases (Pol I, II and III) that share some subunits. RPA12 in Pol I, RPB9 in Pol II, RPC11 in Pol III and TFS in archaea …
gp152	YP_009165903.1	CDD:259793	36.364	33	21	0	845	877	15	47	1.36e-16	73.2	cd10508	Zn-ribbon_RPB9	C-terminal zinc ribbon domain of RPB9 subunit of RNA polymerase II. The C-terminal zinc ribbon domain (C-ribbon) of subunit B9 (Zn-ribbon_RPB9) in RNA polymerase (Pol) II is involved in intrinsic transcript cleavage. Eukaryote genomes are transcribed by three nuclear RNA polymerases (Pol I, II and III) that share some subunits. RPB9 have strong homology to RPA12 of Pol I and RPC11 of Pol III subu…
gp152	YP_009165903.1	CDD:259796	42.308	26	15	0	852	877	19	44	3.93e-13	63.5	cd13749	Zn-ribbon_TFIIS	domain III/zinc ribbon domain of Transcription Factor IIS. TFIIS is a zinc-containing transcription factor. It has been shown in vitro to have distinct biochemical activities, including binding to RNA polymerases, stimulation of transcript elongation, and activation of a nascent RNA cleavage activity in the RNA polymerase II (Pol II) elongation complex. TFIIS consists of three domains. Domain II …
gp193	YP_009165944.1	CDD:335201	30.508	177	104	6	48	216	1	166	1.22e-92	288	pfam03067	LPMO_10	Lytic polysaccharide mono-oxygenase, cellulose-degrading. This domain is found associated with a wide variety of cellulose binding domains. This is a family of two very closely related proteins that together act as both a C1- and a C4-oxidising lytic polysaccharide mono-oxygenase, degrading cellulose. This domain is also found in baculoviral spheroidins and spindolins, protein of unknown function.
gp193	YP_009165944.1	CDD:237309	32.673	202	114	7	24	216	2	190	3.15e-82	272	PRK13211	PRK13211	N-acetylglucosamine-binding protein GbpA.
gp193	YP_009165944.1	CDD:177623	16	250	145	10	29	216	1	247	2.02e-34	131	PHA03387	gp37	spherodin-like protein; Provisional
gp193	YP_009165944.1	CDD:236304	15.063	239	196	2	631	865	27	262	1.24e-19	93	PRK08581	PRK08581	amidase domain-containing protein.
gp215	YP_009165966.1	CDD:274009	12.972	848	707	7	56	874	193	1038	6.29e-32	135	TIGR02169	SMC_prok_A	chromosome segregation protein SMC, primarily archaeal type. SMC (structural maintenance of chromosomes) proteins bind DNA and act in organizing and segregating chromosomes for partition. SMC proteins are found in bacteria, archaea, and eukaryotes. It is found in a single copy and is homodimeric in prokaryotes, but six paralogs (excluded from this family) are found in eukarotes, where SMC protein…
gp215	YP_009165966.1	CDD:274009	13.176	888	701	8	593	1414	155	1038	1.79e-31	134	TIGR02169	SMC_prok_A	chromosome segregation protein SMC, primarily archaeal type. SMC (structural maintenance of chromosomes) proteins bind DNA and act in organizing and segregating chromosomes for partition. SMC proteins are found in bacteria, archaea, and eukaryotes. It is found in a single copy and is homodimeric in prokaryotes, but six paralogs (excluded from this family) are found in eukarotes, where SMC protein…
gp215	YP_009165966.1	CDD:274009	13.565	892	730	7	107	997	187	1038	1.88e-28	124	TIGR02169	SMC_prok_A	chromosome segregation protein SMC, primarily archaeal type. SMC (structural maintenance of chromosomes) proteins bind DNA and act in organizing and segregating chromosomes for partition. SMC proteins are found in bacteria, archaea, and eukaryotes. It is found in a single copy and is homodimeric in prokaryotes, but six paralogs (excluded from this family) are found in eukarotes, where SMC protein…
gp215	YP_009165966.1	CDD:274009	11.723	853	729	8	63	906	186	1023	7.68e-25	112	TIGR02169	SMC_prok_A	chromosome segregation protein SMC, primarily archaeal type. SMC (structural maintenance of chromosomes) proteins bind DNA and act in organizing and segregating chromosomes for partition. SMC proteins are found in bacteria, archaea, and eukaryotes. It is found in a single copy and is homodimeric in prokaryotes, but six paralogs (excluded from this family) are found in eukarotes, where SMC protein…
gp215	YP_009165966.1	CDD:274009	12.702	866	740	6	441	1292	186	1049	7.88e-25	112	TIGR02169	SMC_prok_A	chromosome segregation protein SMC, primarily archaeal type. SMC (structural maintenance of chromosomes) proteins bind DNA and act in organizing and segregating chromosomes for partition. SMC proteins are found in bacteria, archaea, and eukaryotes. It is found in a single copy and is homodimeric in prokaryotes, but six paralogs (excluded from this family) are found in eukarotes, where SMC protein…
gp215	YP_009165966.1	CDD:274009	12.056	929	781	10	1057	1957	186	1106	3.78e-22	103	TIGR02169	SMC_prok_A	chromosome segregation protein SMC, primarily archaeal type. SMC (structural maintenance of chromosomes) proteins bind DNA and act in organizing and segregating chromosomes for partition. SMC proteins are found in bacteria, archaea, and eukaryotes. It is found in a single copy and is homodimeric in prokaryotes, but six paralogs (excluded from this family) are found in eukarotes, where SMC protein…
gp215	YP_009165966.1	CDD:274009	14.589	754	590	7	25	777	318	1018	8.37e-21	99.1	TIGR02169	SMC_prok_A	chromosome segregation protein SMC, primarily archaeal type. SMC (structural maintenance of chromosomes) proteins bind DNA and act in organizing and segregating chromosomes for partition. SMC proteins are found in bacteria, archaea, and eukaryotes. It is found in a single copy and is homodimeric in prokaryotes, but six paralogs (excluded from this family) are found in eukarotes, where SMC protein…
gp215	YP_009165966.1	CDD:274008	16.056	928	714	9	119	997	141	1052	2.78e-20	97.5	TIGR02168	SMC_prok_B	chromosome segregation protein SMC, common bacterial type. SMC (structural maintenance of chromosomes) proteins bind DNA and act in organizing and segregating chromosomes for partition. SMC proteins are found in bacteria, archaea, and eukaryotes. This family represents the SMC protein of most bacteria. The smc gene is often associated with scpB (TIGR00281) and scpA genes, where scp stands for seg…
gp215	YP_009165966.1	CDD:274009	12.573	859	739	6	1090	1945	154	1003	4.32e-20	96.8	TIGR02169	SMC_prok_A	chromosome segregation protein SMC, primarily archaeal type. SMC (structural maintenance of chromosomes) proteins bind DNA and act in organizing and segregating chromosomes for partition. SMC proteins are found in bacteria, archaea, and eukaryotes. It is found in a single copy and is homodimeric in prokaryotes, but six paralogs (excluded from this family) are found in eukarotes, where SMC protein…
gp215	YP_009165966.1	CDD:314924	12.071	787	685	5	505	1289	243	1024	6.81e-19	92.9	pfam12128	DUF3584	Protein of unknown function (DUF3584). This protein is found in bacteria and eukaryotes. Proteins in this family are typically between 943 to 1234 amino acids in length. This family contains a P-loop motif suggesting it is a nucleotide binding protein. It may be involved in replication.
gp215	YP_009165966.1	CDD:314924	11.183	769	668	5	20	778	280	1043	8.92e-19	92.5	pfam12128	DUF3584	Protein of unknown function (DUF3584). This protein is found in bacteria and eukaryotes. Proteins in this family are typically between 943 to 1234 amino acids in length. This family contains a P-loop motif suggesting it is a nucleotide binding protein. It may be involved in replication.
gp215	YP_009165966.1	CDD:274008	11.303	982	823	6	524	1491	145	1092	7.77e-18	89.4	TIGR02168	SMC_prok_B	chromosome segregation protein SMC, common bacterial type. SMC (structural maintenance of chromosomes) proteins bind DNA and act in organizing and segregating chromosomes for partition. SMC proteins are found in bacteria, archaea, and eukaryotes. This family represents the SMC protein of most bacteria. The smc gene is often associated with scpB (TIGR00281) and scpA genes, where scp stands for seg…
gp215	YP_009165966.1	CDD:275316	12.57	716	618	6	267	980	24	733	2.38e-17	87.5	TIGR04523	Mplasa_alph_rch	helix-rich Mycoplasma protein. Members of this family occur strictly within a subset of Mycoplasma species. Members average 750 amino acids in length, including signal peptide. Sequences are predicted (Jpred 3) to be almost entirely alpha-helical. These sequences show strong periodicity (consistent with long alpha helical structures) and low complexity rich in D,E,N,Q, and K. Genes encoding these…
gp215	YP_009165966.1	CDD:274009	15.084	358	303	1	55	412	689	1045	5.43e-16	83.7	TIGR02169	SMC_prok_A	chromosome segregation protein SMC, primarily archaeal type. SMC (structural maintenance of chromosomes) proteins bind DNA and act in organizing and segregating chromosomes for partition. SMC proteins are found in bacteria, archaea, and eukaryotes. It is found in a single copy and is homodimeric in prokaryotes, but six paralogs (excluded from this family) are found in eukarotes, where SMC protein…
gp215	YP_009165966.1	CDD:275316	10.064	467	413	2	64	523	214	680	2.03e-15	81.3	TIGR04523	Mplasa_alph_rch	helix-rich Mycoplasma protein. Members of this family occur strictly within a subset of Mycoplasma species. Members average 750 amino acids in length, including signal peptide. Sequences are predicted (Jpred 3) to be almost entirely alpha-helical. These sequences show strong periodicity (consistent with long alpha helical structures) and low complexity rich in D,E,N,Q, and K. Genes encoding these…
gp215	YP_009165966.1	CDD:274008	11.521	894	772	4	1047	1927	143	1030	4.36e-15	80.6	TIGR02168	SMC_prok_B	chromosome segregation protein SMC, common bacterial type. SMC (structural maintenance of chromosomes) proteins bind DNA and act in organizing and segregating chromosomes for partition. SMC proteins are found in bacteria, archaea, and eukaryotes. This family represents the SMC protein of most bacteria. The smc gene is often associated with scpB (TIGR00281) and scpA genes, where scp stands for seg…
gp215	YP_009165966.1	CDD:274009	9.817	927	806	8	988	1912	187	1085	6.85e-15	79.8	TIGR02169	SMC_prok_A	chromosome segregation protein SMC, primarily archaeal type. SMC (structural maintenance of chromosomes) proteins bind DNA and act in organizing and segregating chromosomes for partition. SMC proteins are found in bacteria, archaea, and eukaryotes. It is found in a single copy and is homodimeric in prokaryotes, but six paralogs (excluded from this family) are found in eukarotes, where SMC protein…
gp215	YP_009165966.1	CDD:224117	13.276	1047	884	5	478	1518	109	1137	2.52e-14	77.9	COG1196	Smc	Chromosome segregation ATPase [Cell cycle control, cell division, chromosome partitioning].
gp215	YP_009165966.1	CDD:274008	12.9	876	753	4	46	913	171	1044	3.55e-14	77.5	TIGR02168	SMC_prok_B	chromosome segregation protein SMC, common bacterial type. SMC (structural maintenance of chromosomes) proteins bind DNA and act in organizing and segregating chromosomes for partition. SMC proteins are found in bacteria, archaea, and eukaryotes. This family represents the SMC protein of most bacteria. The smc gene is often associated with scpB (TIGR00281) and scpA genes, where scp stands for seg…
gp215	YP_009165966.1	CDD:274008	12.859	871	742	6	82	943	171	1033	5.06e-14	77.1	TIGR02168	SMC_prok_B	chromosome segregation protein SMC, common bacterial type. SMC (structural maintenance of chromosomes) proteins bind DNA and act in organizing and segregating chromosomes for partition. SMC proteins are found in bacteria, archaea, and eukaryotes. This family represents the SMC protein of most bacteria. The smc gene is often associated with scpB (TIGR00281) and scpA genes, where scp stands for seg…
gp215	YP_009165966.1	CDD:235316	9.182	1100	974	10	36	1121	236	1324	7.14e-14	76.7	PRK04863	mukB	chromosome partition protein MukB.
gp215	YP_009165966.1	CDD:336190	10.846	544	466	6	114	656	35	560	1.08e-12	72.1	pfam05701	WEMBL	Weak chloroplast movement under blue light. WEMBL consists of several plant proteins required for the chloroplast avoidance response under high intensity blue light. This avoidance response consists in the relocation of chloroplasts on the anticlinal side of exposed cells. Acts in association with PMI2 to maintain the velocity of chloroplast photo-relocation movement via the regulation of cp-acti…
gp215	YP_009165966.1	CDD:336159	11.265	506	440	4	49	547	153	656	1.8e-12	71.7	pfam05622	HOOK	HOOK protein. This family consists of several HOOK1, 2 and 3 proteins from different eukaryotic organisms. The different members of the human gene family are HOOK1, HOOK2 and HOOK3. Different domains have been identified in the three human HOOK proteins, and it was demonstrated that the highly conserved NH2-domain mediates attachment to microtubules, whereas the central coiled-coil motif mediates…
gp215	YP_009165966.1	CDD:314924	9.889	718	626	6	1228	1941	227	927	1.4e-11	69	pfam12128	DUF3584	Protein of unknown function (DUF3584). This protein is found in bacteria and eukaryotes. Proteins in this family are typically between 943 to 1234 amino acids in length. This family contains a P-loop motif suggesting it is a nucleotide binding protein. It may be involved in replication.
gp215	YP_009165966.1	CDD:274008	10.306	883	767	6	429	1287	162	1043	1.82e-11	68.6	TIGR02168	SMC_prok_B	chromosome segregation protein SMC, common bacterial type. SMC (structural maintenance of chromosomes) proteins bind DNA and act in organizing and segregating chromosomes for partition. SMC proteins are found in bacteria, archaea, and eukaryotes. This family represents the SMC protein of most bacteria. The smc gene is often associated with scpB (TIGR00281) and scpA genes, where scp stands for seg…
gp215	YP_009165966.1	CDD:224259	12.587	286	248	1	157	440	6	291	2.61e-11	65.9	COG1340	COG1340	Uncharacterized coiled-coil protein, contains DUF342 domain [Function unknown].
gp215	YP_009165966.1	CDD:310273	9.881	587	508	6	282	862	1	572	2.76e-11	67.5	pfam05557	MAD	Mitotic checkpoint protein. This family consists of several eukaryotic mitotic checkpoint (Mitotic arrest deficient or MAD) proteins. The mitotic spindle checkpoint monitors proper attachment of the bipolar spindle to the kinetochores of aligned sister chromatids and causes a cell cycle arrest in prometaphase when failures occur. Multiple components of the mitotic spindle checkpoint have been ide…
gp215	YP_009165966.1	CDD:336190	11.698	530	466	2	72	600	32	560	5.37e-11	66.3	pfam05701	WEMBL	Weak chloroplast movement under blue light. WEMBL consists of several plant proteins required for the chloroplast avoidance response under high intensity blue light. This avoidance response consists in the relocation of chloroplasts on the anticlinal side of exposed cells. Acts in association with PMI2 to maintain the velocity of chloroplast photo-relocation movement via the regulation of cp-acti…
gp216	YP_009165967.1	CDD:333968	45.614	171	92	1	2153	2323	1	170	1.54e-102	329	pfam00268	Ribonuc_red_sm	Ribonucleotide reductase, small chain.
gp216	YP_009165967.1	CDD:153108	45.402	174	89	3	2154	2323	1	172	2.33e-96	312	cd01049	RNRR2	Ribonucleotide Reductase, R2/beta subunit, ferritin-like diiron-binding domain. Ribonucleotide Reductase, R2/beta subunit (RNRR2) is a member of a broad superfamily of ferritin-like diiron-carboxylate proteins. The RNR protein catalyzes the conversion of ribonucleotides to deoxyribonucleotides and is found in all eukaryotes, many prokaryotes, several viruses, and few archaea. The catalytically ac…
gp216	YP_009165967.1	CDD:223286	29.146	199	132	2	2133	2323	6	203	4.11e-95	311	COG0208	NrdF	Ribonucleotide reductase beta subunit, ferritin-like domain [Nucleotide transport and metabolism].
gp216	YP_009165967.1	CDD:236591	24.176	182	135	3	2143	2323	1	180	7.65e-93	303	PRK09614	nrdF	ribonucleotide-diphosphate reductase subunit beta; Reviewed
gp216	YP_009165967.1	CDD:275027	24.26	169	124	3	2151	2319	1	165	3.78e-82	272	TIGR04171	RNR_1b_NrdF	ribonucleoside-diphosphate reductase, class 1b, beta subunit. Members of this family are NrdF, the beta subunit of class 1b ribonucleotide reductase. This form uses a dimanganese moiety associated with a tyrosine radical to reduce the cellular requirement for iron. [Purines, pyrimidines, nucleosides, and nucleotides, 2'-Deoxyribonucleotide metabolism]
gp216	YP_009165967.1	CDD:235968	22.816	206	140	5	2129	2319	25	226	5.27e-74	251	PRK07209	PRK07209	ribonucleotide-diphosphate reductase subunit beta; Validated
gp216	YP_009165967.1	CDD:181647	16.514	218	148	4	2131	2319	5	217	7.36e-44	164	PRK09101	nrdB	ribonucleotide-diphosphate reductase subunit beta; Reviewed
gp216	YP_009165967.1	CDD:236242	20.149	134	96	4	2134	2263	1	127	1.36e-21	97.1	PRK08326	PRK08326	R2-like ligand-binding oxidase.
gp216	YP_009165967.1	CDD:153120	22.807	114	78	5	2154	2263	3	110	1.45e-18	87.5	cd07911	RNRR2_Rv0233_like	Ribonucleotide Reductase R2-like protein, Mn/Fe-binding domain. Rv0233 is a Mycobacterium tuberculosis ribonucleotide reductase R2 protein with a heterodinuclear manganese/iron-carboxylate cofactor located in its metal center. The Rv0233-like family may represent a structural/functional counterpart of the evolutionary ancestor of the RNRR2's (Ribonucleotide Reductase, R2/beta subunit) and the bac…
gp217	YP_009165968.1	CDD:223286	32.237	152	84	8	1	143	207	348	2.24e-58	183	COG0208	NrdF	Ribonucleotide reductase beta subunit, ferritin-like domain [Nucleotide transport and metabolism].
gp217	YP_009165968.1	CDD:235968	31.618	136	82	5	1	127	234	367	5.87e-56	177	PRK07209	PRK07209	ribonucleotide-diphosphate reductase subunit beta; Validated
gp217	YP_009165968.1	CDD:153108	38.261	115	60	4	1	106	176	288	4.96e-47	152	cd01049	RNRR2	Ribonucleotide Reductase, R2/beta subunit, ferritin-like diiron-binding domain. Ribonucleotide Reductase, R2/beta subunit (RNRR2) is a member of a broad superfamily of ferritin-like diiron-carboxylate proteins. The RNR protein catalyzes the conversion of ribonucleotides to deoxyribonucleotides and is found in all eukaryotes, many prokaryotes, several viruses, and few archaea. The catalytically ac…
gp217	YP_009165968.1	CDD:275027	19.595	148	99	6	1	137	173	311	2.42e-45	148	TIGR04171	RNR_1b_NrdF	ribonucleoside-diphosphate reductase, class 1b, beta subunit. Members of this family are NrdF, the beta subunit of class 1b ribonucleotide reductase. This form uses a dimanganese moiety associated with a tyrosine radical to reduce the cellular requirement for iron. [Purines, pyrimidines, nucleosides, and nucleotides, 2'-Deoxyribonucleotide metabolism]
gp217	YP_009165968.1	CDD:236591	23.377	154	94	8	1	143	184	324	7.33e-43	143	PRK09614	nrdF	ribonucleotide-diphosphate reductase subunit beta; Reviewed
gp217	YP_009165968.1	CDD:333968	35.849	106	59	3	1	99	174	277	4.83e-42	139	pfam00268	Ribonuc_red_sm	Ribonucleotide reductase, small chain.
gp217	YP_009165968.1	CDD:181647	17.568	148	107	4	1	135	225	370	2.58e-30	111	PRK09101	nrdB	ribonucleotide-diphosphate reductase subunit beta; Reviewed
gp218	YP_009165969.1	CDD:334067	25.874	143	81	7	97	224	22	154	6e-29	112	pfam00413	Peptidase_M10	Matrixin. The members of this family are enzymes that cleave peptides. These proteases require zinc for catalysis.
gp218	YP_009165969.1	CDD:239805	29.078	141	71	9	100	224	25	152	3.74e-28	110	cd04278	ZnMc_MMP	Zinc-dependent metalloprotease, matrix metalloproteinase (MMP) sub-family. MMPs are responsible for a great deal of pericellular proteolysis of extracellular matrix and cell surface molecules, playing crucial roles in morphogenesis, cell fate specification, cell migration, tissue repair, tumorigenesis, gain or loss of tissue-specific functions, and apoptosis. In many instances, they are anchored …
gp218	YP_009165969.1	CDD:214576	21.905	105	62	6	129	224	40	133	2.24e-20	87.1	smart00235	ZnMc	Zinc-dependent metalloprotease. Neutral zinc metallopeptidases. This alignment represents a subset of known subfamilies. Highest similarity occurs in the HExxH zinc-binding site/ active site.
gp218	YP_009165969.1	CDD:237325	31.667	60	36	2	173	227	112	171	9.57e-13	66.3	PRK13267	PRK13267	archaemetzincin-like protein; Reviewed
gp218	YP_009165969.1	CDD:239797	26.582	79	49	2	136	208	88	163	4.33e-12	64.7	cd04269	ZnMc_adamalysin_II_like	Zinc-dependent metalloprotease; adamalysin_II_like subfamily. Adamalysin II is a snake venom zinc endopeptidase. This subfamily contains other snake venom metalloproteinases, as well as membrane-anchored metalloproteases belonging to the ADAM family. ADAMs (A Disintegrin And Metalloprotease) are glycoproteins, which play roles in cell signaling, cell fusion, and cell-cell interactions.
gp225	YP_009165976.1	CDD:236304	14.124	177	141	3	611	778	28	202	6.84e-23	104	PRK08581	PRK08581	amidase domain-containing protein.
gp226	YP_009165977.1	CDD:313469	15.596	109	85	2	105	206	126	234	8.47e-14	73.3	pfam10243	MIP-T3	Microtubule-binding protein MIP-T3. This protein, which interacts with both microtubules and TRAF3 (tumor necrosis factor receptor-associated factor 3), is conserved from worms to humans. The N-terminal region is the microtubule binding domain and is well-conserved; the C-terminal 100 residues, also well-conserved, constitute the coiled-coil region which binds to TRAF3. The central region of the …
gp235	YP_009165986.1	CDD:176500	23.396	265	177	11	84	333	5	258	5.63e-83	251	cd08557	PI-PLCc_bacteria_like	Catalytic domain of bacterial phosphatidylinositol-specific phospholipase C and similar proteins. This subfamily corresponds to the catalytic domain present in bacterial phosphatidylinositol-specific phospholipase C (PI-PLC, EC 4.6.1.13) and their sequence homologs found in eukaryota. Bacterial PI-PLCs participate in Ca2+-independent PI metabolism, hydrolyzing the membrane lipid phosphatidylinosi…
gp235	YP_009165986.1	CDD:176528	18.45	271	191	8	83	333	5	265	4.71e-68	213	cd08586	PI-PLCc_BcPLC_like	Catalytic domain of Bacillus cereus phosphatidylinositol-specific phospholipases C and similar proteins. This subfamily corresponds to the catalytic domain present in Bacillus cereus phosphatidylinositol-specific phospholipase C (PI-PLC, EC 4.6.1.13) and its sequence homologs found in bacteria and eukaryota. Bacterial PI-PLCs participate in Ca2+-independent PI metabolism, hydrolyzing the membrane…
gp235	YP_009165986.1	CDD:176529	20	285	185	13	81	333	2	275	1.35e-63	202	cd08587	PI-PLCXDc_like	Catalytic domain of phosphatidylinositol-specific phospholipase C X domain containing and similar proteins. This family corresponds to the catalytic domain present in phosphatidylinositol-specific phospholipase C X domain containing proteins (PI-PLCXD) which are bacterial phosphatidylinositol-specific phospholipase C (PI-PLC, EC 4.6.1.13) sequence homologs mainly found in eukaryota. The typical e…
gp235	YP_009165986.1	CDD:176555	20.629	286	175	12	85	333	7	277	5.39e-55	180	cd08616	PI-PLCXD1c	Catalytic domain of phosphatidylinositol-specific phospholipase C, X domain containing 1. This subfamily corresponds to the catalytic domain present in a group of phosphatidylinositol-specific phospholipase C X domain containing 1 (PI-PLCXD1), 2 (PI-PLCXD2) and 3 (PI-PLCXD3), which are bacterial phosphatidylinositol-specific phospholipase C (PI-PLC, EC 4.6.1.13) sequence homologs found in vertebr…
gp235	YP_009165986.1	CDD:176557	15.942	276	200	10	80	333	1	266	1.11e-41	145	cd08620	PI-PLCXDc_like_1	Catalytic domain of uncharacterized hypothetical proteins similar to eukaryotic phosphatidylinositol-specific phospholipase C, X domain containing proteins. This subfamily corresponds to the catalytic domain present in a group of uncharacterized hypothetical proteins found in bacteria and fungi, which are similar to eukaryotic phosphatidylinositol-specific phospholipase C, X domain containing pro…
gp235	YP_009165986.1	CDD:176558	14.235	281	207	9	85	332	6	285	6.23e-41	144	cd08621	PI-PLCXDc_like_2	Catalytic domain of uncharacterized hypothetical proteins similar to eukaryotic phosphatidylinositol-specific phospholipase C, X domain containing proteins. This subfamily corresponds to the catalytic domain present in a group of uncharacterized hypothetical proteins found in bacteria and fungi, which are similar to eukaryotic phosphatidylinositol-specific phospholipase C, X domain containing pro…
gp235	YP_009165986.1	CDD:176530	17.375	259	194	9	85	333	9	257	3.2e-39	138	cd08588	PI-PLCc_At5g67130_like	Catalytic domain of Arabidopsis thaliana PI-PLC X domain-containing protein At5g67130 and its uncharacterized homologs. This subfamily corresponds to the catalytic domain present in Arabidopsis thaliana PI-PLC X domain-containing protein At5g67130 and its uncharacterized homologs. Members in this family show high sequence similarity to bacterial phosphatidylinositol-specific phospholipase C (PI-P…
gp235	YP_009165986.1	CDD:176559	16.105	267	196	12	84	333	5	260	2.75e-38	136	cd08622	PI-PLCXDc_CG14945_like	Catalytic domain of Drosophila melanogaster CG14945-like proteins similar to phosphatidylinositol-specific phospholipase C, X domain containing. This subfamily corresponds to the catalytic domain present in uncharacterized metazoan Drosophila melanogaster CG14945-like proteins, which are similar to eukaryotic phosphatidylinositol-specific phospholipase C, X domain containing proteins (PI-PLCXD). …
gp235	YP_009165986.1	CDD:197543	21.233	146	107	4	85	229	2	140	6.55e-38	131	smart00148	PLCXc	Phospholipase C, catalytic domain (part); domain X. Phosphoinositide-specific phospholipases C. These enzymes contain 2 regions (X and Y) which together form a TIM barrel-like structure containing the active site residues. Phospholipase C enzymes (PI-PLC) act as signal transducers that generate two second messengers, inositol-1,4,5-trisphosphate and diacylglycerol. The bacterial enzyme appears to…
gp235	YP_009165986.1	CDD:176532	14.286	252	191	7	83	318	5	247	2.15e-32	120	cd08590	PI-PLCc_Rv2075c_like	Catalytic domain of uncharacterized Mycobacterium tuberculosis Rv2075c-like proteins. This subfamily corresponds to the catalytic domain present in uncharacterized Mycobacterium tuberculosis Rv2075c and its homologs. Members in this family are more closely related to the Streptomyces antibioticus phosphatidylinositol-specific phospholipase C1(SaPLC1)-like proteins rather than the typical bacteria…
gp235	YP_009165986.1	CDD:176531	14.42	319	191	12	80	333	1	302	1.03e-30	117	cd08589	PI-PLCc_SaPLC1_like	Catalytic domain of Streptomyces antibioticus phosphatidylinositol-specific phospholipase C1-like proteins. This subfamily corresponds to the catalytic domain present in Streptomyces antibioticus phosphatidylinositol-specific phospholipase C1 (SaPLC1) and similar proteins. The typical bacterial phosphatidylinositol-specific phospholipase C (PI-PLC, EC 4.6.1.13) catalyzes Ca2+-independent hydrolys…
gp235	YP_009165986.1	CDD:334053	16.429	140	108	5	85	222	2	134	1.39e-25	98.8	pfam00388	PI-PLC-X	Phosphatidylinositol-specific phospholipase C, X domain. This associates with pfam00387 to form a single structural unit.
gp235	YP_009165986.1	CDD:176535	17.241	145	112	4	86	229	6	143	1.04e-24	99.6	cd08593	PI-PLCc_delta	Catalytic domain of metazoan phosphoinositide-specific phospholipase C-delta. This subfamily corresponds to the catalytic domain present in metazoan phosphoinositide-specific phospholipase C (PI-PLC, EC 3.1.4.11)-delta isozymes. PI-PLC is a signaling enzyme that hydrolyzes the membrane phospholipids phosphatidylinositol-4,5-bisphosphate (PIP2) to generate two important second messengers in eukary…
gp235	YP_009165986.1	CDD:176540	17.123	146	113	4	85	229	5	143	1.63e-24	98.4	cd08598	PI-PLC1c_yeast	Catalytic domain of putative yeast phosphatidylinositide-specific phospholipases C. This family corresponds to the catalytic domain present in a group of putative phosphoinositide-specific phospholipase C (PI-PLC, EC 3.1.4.11) encoded by PLC1 genes from yeasts, which are homologs of the delta isoforms of mammalian PI-PLC in terms of overall sequence similarity and domain organization. Mammalian P…
gp235	YP_009165986.1	CDD:176501	15.942	138	108	4	86	222	6	136	6.1e-23	94.2	cd08558	PI-PLCc_eukaryota	Catalytic domain of eukaryotic phosphoinositide-specific phospholipase C and similar proteins. This family corresponds to the catalytic domain present in eukaryotic phosphoinositide-specific phospholipase C (PI-PLC, EC 3.1.4.11) and similar proteins. The higher eukaryotic PI-PLCs play a critical role in most signal transduction pathways, controlling numerous cellular events such as cell growth, p…
gp235	YP_009165986.1	CDD:318806	11.491	322	192	11	87	333	1	304	4.17e-22	93.8	pfam16670	PI-PLC-C1	Phosphoinositide phospholipase C, Ca2+-dependent. PI-PLC-C1 is a family of calcium 2+-dependent phosphatidylinositol-specific phospholipase C1 enzymes from bacteria and fungi. The enzyme classification number is EC:3.1.4.11. This enzyme is involved in part of the myo-inositol phosphate metabolic pathway.
gp235	YP_009165986.1	CDD:176533	14.094	149	120	4	85	229	5	149	6.04e-22	92.3	cd08591	PI-PLCc_beta	Catalytic domain of metazoan phosphoinositide-specific phospholipase C-beta. This subfamily corresponds to the catalytic domain present in metazoan phosphoinositide-specific phospholipase C (PI-PLC, EC 3.1.4.11)-beta isozymes. PI-PLC is a signaling enzyme that hydrolyzes the membrane phospholipids phosphatidylinositol-4,5-bisphosphate (PIP2) to generate two important second messengers in eukaryot…
gp235	YP_009165986.1	CDD:176498	16.279	129	83	3	119	240	19	129	1.81e-14	69.6	cd08555	PI-PLCc_GDPD_SF	Catalytic domain of phosphoinositide-specific phospholipase C-like phosphodiesterases superfamily. The PI-PLC-like phosphodiesterases superfamily represents the catalytic domains of bacterial phosphatidylinositol-specific phospholipase C (PI-PLC, EC 4.6.1.13), eukaryotic phosphoinositide-specific phospholipase C (PI-PLC, EC 3.1.4.11), glycerophosphodiester phosphodiesterases (GP-GDE, EC 3.1.4.46)…
gp237	YP_009165988.1	CDD:313063	17.241	174	134	6	1065	1232	182	351	7.6e-22	102	pfam09770	PAT1	Topoisomerase II-associated protein PAT1. Members of this family are necessary for accurate chromosome transmission during cell division.
