# Supplementary material for: Data mining reveals tissue-specific expression and host lineage-associated forms of Apis mellifera filamentous virus
Source: PeerJ. 2023 Nov 14;11:e16455. doi: 10.7717/peerj.16455 (PMC10655722; doi:10.7717/peerj.16455)
Supplement: Supplemental Information 20 — Values are derived from mapping reads to reference accession NC_027925.1. Columns colored yellow are whole-body tissue samples from BioProject PRJNA706851 and columns colored green are brain tissue samples from BioProject PRJNA740269. Note that six accessions from these BioProjects that were AmFV positive were excluded here due to low total counts, rendering them not useful for relative gene expression analysis. [file peerj-11-16455-s020.xlsx]

## Sheet: ORF relative abundance
Supplemental File S9. Log-ratio transformed relative abundance of each open reading frame (ORF) in 42 sequence data accessions positive for Apis mellifera filamentous virus (AmFV). Values are derived from mapping reads to reference accession NC_027925.1. Columns colored yellow are whole-body tissue samples from BioProject PRJNA706851 and columns colored green are brain tissue samples from BioProj…
ORF	SRR13871577	SRR13871578	SRR13871579	SRR13871581	SRR13871611	SRR13871645	SRR13871647	SRR13871650	SRR13871651	SRR13871652	SRR13871655	SRR13871671	SRR13871673	SRR13871674	SRR13871676	SRR13871678	SRR13871679	SRR13871680	SRR13871681	SRR13871685	SRR13871687	SRR13871688	SRR13871690	SRR13871694	SRR13871706	SRR13871707	SRR13871708	SRR13871709	SRR13871710	SRR13871711	SRR13871718	SRR13871721	SRR13871724	SRR13871725	SRR13871727	SRR13871729	SRR14887965	SRR14887970	SRR14887971	SRR14887973	SRR14887977	SRR14887996
gp001	3.26017	3.69592	3.65659	4.01776	3.92334	3.56544	4.62211	3.81653	2.98875	4.02979	3.40002	3.38091	3.76798	4.41458	3.63439	3.43694	4.19534	3.08694	3.91453	4.08543	4.07494	3.78015	3.93198	3.44655	3.76064	3.76343	3.56112	3.5247	3.99869	4.2864	3.47271	4.4023	3.93832	4.06912	3.91459	3.87628	3.38477	3.88864	0	3.19397	3.75997	3.60248
gp002	3.35315	3.45447	3.33284	3.67673	3.60338	2.86996	3.64186	3.34911	3.30086	3.68512	3.36186	3.38091	3.55744	3.60217	3.51715	3.35587	3.81868	3.35225	3.13637	3.58675	3.32463	3.37964	3.05691	3.34936	3.40765	3.50812	3.65317	3.42624	3.57806	3.72253	3.48557	3.51882	3.37826	3.59549	3.39607	3.14033	0	2.77964	2.54123	0	3.33896	2.93948
gp003	3.84179	3.38477	3.19488	2.73561	2.85609	0	2.43774	3.18479	3.81327	3.05305	3.29931	2.84761	2.85893	2.63155	3.22918	3.08257	2.93415	3.65525	2.55412	3.15113	2.66763	2.09214	3.07948	3.57826	2.88491	3.38358	3.6448	3.10483	2.64161	0	3.27496	2.48087	2.65072	2.67995	2.82859	2.66321	0	0	0	0	0	2.7054
gp005	3.26698	3.58097	3.64458	3.85532	3.86245	3.41403	4.15889	3.69843	3.17956	3.76498	3.37073	3.79588	3.48111	4.16935	3.3979	3.16461	3.87753	3.20151	3.50061	4.0801	4.00398	3.80976	4.08859	3.60244	3.70753	3.62726	3.54281	3.34071	3.66893	4.34208	3.37002	4.261	3.87377	4.02011	3.73236	3.66321	4.00802	3.77677	3.44432	4.37957	3.57906	4.76091
gp006	3.81984	3.92673	4.08967	4.10386	4.15671	4.18481	4.62741	4.23333	3.826	4.09951	3.9065	3.92382	4.01603	4.48017	3.86067	3.79389	4.20631	3.5444	3.96568	4.24182	4.23834	4.18657	4.16435	4.01246	4.14656	3.94824	3.99378	3.82936	4.03217	4.2805	3.88531	4.47724	4.09885	4.1783	4.04136	4.09564	2.98683	2.87791	0	3.56578	3.20066	3.60224
gp008	3.24944	3.09043	3.32459	2.89306	3.24504	2.94061	3.19766	3.487	3.27997	3.08502	3.17035	2.71267	3.25668	3.31121	3.10275	3.37736	3.31749	3.18309	2.97101	3.50625	3.31495	3.60099	3.53113	3.35361	3.38147	3.08248	3.50141	3.1309	3.05452	2.22313	3.36349	2.85223	3.14209	3.08856	3.23711	3.19667	0	0	0	0	0	0
gp009	3.05206	3.36334	3.24534	3.63984	3.34346	3.7086	3.35542	3.28633	2.96474	3.46302	3.05828	2.50585	3.4823	3.73343	3.43709	3.09644	3.53069	2.85319	3.23846	3.46782	3.4781	3.19799	3.56835	3.08466	3.48066	3.39566	2.97977	3.378	3.64032	3.51336	3.07914	3.76201	3.43155	3.69895	3.43441	3.32005	0	0	0	0	0	0
gp011	3.27399	3.44762	3.48509	3.56052	3.5109	3.56893	3.68489	3.49155	3.32782	3.5506	3.35966	3.40894	3.48907	3.73209	3.42324	3.2337	3.72419	3.14558	3.67961	3.72146	3.6192	3.54515	3.57805	3.37263	3.38409	3.40892	3.41914	3.37409	3.53273	4.00305	3.26807	3.87225	3.47607	3.67314	3.47281	3.36468	0	0	0	2.495	0	2.63845
gp016	3.1278	3.3644	3.39108	3.66607	3.45125	3.60396	4.14593	3.43359	2.8695	3.53695	3.14505	3.40548	3.2848	3.9484	3.14589	3.06478	3.57625	2.93485	3.53431	3.82504	3.65777	3.7293	3.63708	3.28098	3.46875	3.37846	2.62136	3.24537	3.47532	4.17269	3.11446	3.80825	3.59106	3.79646	3.60356	3.56339	2.6858	0	2.84226	3.27315	3.07572	2.46236
gp017	2.7613	2.84052	2.85696	2.79319	2.92145	3.04605	2.6994	2.64082	2.85613	2.84563	2.70602	2.50585	2.81804	2.94034	2.7551	2.97569	3.02349	3.01234	3.1977	2.93424	2.86615	3.22865	3.23397	2.85148	2.85245	2.72792	3.23051	2.782	2.71906	3.0436	2.9367	2.31651	2.78735	2.93528	2.81665	2.78815	0	0	0	2.99606	0	2.16133
gp018	3.40486	3.33407	3.67431	3.3812	3.61741	3.34708	3.76188	3.86422	3.47205	3.56574	3.7505	2.90379	3.43881	3.67846	3.46075	3.35505	3.51805	3.19071	3.31247	3.5589	3.63674	3.94258	3.53404	3.48922	3.63994	3.40815	3.49952	3.39063	3.4433	3.59759	3.40121	3.64244	3.37166	3.48722	3.58281	3.48261	0	3.12095	0	2.79603	2.5986	2.63845
gp019	3.7108	3.7617	4.04596	4.05867	4.0884	4.04489	4.37021	4.14205	3.59502	4.03642	3.87727	3.75821	3.85129	4.31489	3.77695	3.79614	4.02719	3.45302	3.80538	4.15691	4.11783	4.04257	4.20366	3.79696	4.02943	3.83355	3.60423	3.74715	3.88899	4.299	3.86359	4.22568	3.95136	4.00151	4.05983	4.02093	0	2.57688	0	3.09706	3.55573	3.18252
gp021	3.64891	3.59335	3.61628	3.95882	3.215	2.76575	3.71343	3.60914	3.53678	3.74601	3.54142	3.0898	3.70859	3.60054	3.68178	3.4473	3.33633	3.77749	3.54235	3.35654	3.56144	3.7861	2.56656	3.43522	3.5085	3.62623	3.44015	3.69486	3.97548	3.63042	3.61129	3.58196	3.74115	3.99573	3.62288	3.40427	0	2.21035	0	0	2.29757	2.16133
gp022	3.32391	3.10255	3.09781	2.97419	3.08983	0	3.34083	3.12715	3.35459	3.04491	3.08803	2.91295	3.00678	3.18013	2.94721	3.1437	2.80285	3.35506	0	3.297	2.95782	2.79111	0	3.05193	3.11262	3.02153	3.03967	3.07636	3.01057	3.24541	2.97943	2.93561	3.09214	3.25603	3.00322	3.33939	0	0	0	2.79603	0	0
gp023	4.08377	3.77119	3.89562	3.63718	3.46566	3.34708	3.77044	3.64121	3.96733	3.61615	4.03969	3.20482	3.75643	3.60802	3.7679	3.80537	3.38693	4.27871	3.45756	3.72836	3.46395	3.74394	3.05691	3.90527	3.75275	3.75756	3.80491	3.8472	3.63906	3.54061	4.00498	3.49241	3.57446	3.81081	3.57315	3.61552	2.98683	2.87791	0	3.09706	0	3.0991
gp024	3.72131	3.41818	3.77034	3.52758	4.13172	4.27865	3.63749	3.69345	3.79587	3.56677	3.74286	4.20363	3.49736	3.54721	3.53948	3.982	3.8654	3.76815	3.64355	3.83231	3.55981	3.85317	4.13802	3.6085	3.69532	3.34486	3.95531	3.57154	3.45388	2.89701	3.67412	3.64367	3.43814	3.39288	3.54862	3.62204	4.05502	4.08454	3.23759	3.09706	3.50223	4.34356
gp025	3.48595	3.33826	3.638	3.59947	3.88838	4.12014	4.3809	3.69154	3.42987	3.62687	3.52287	3.39608	3.50221	4.13716	3.41727	3.59508	3.90832	3.28723	3.75494	3.77312	3.80977	3.61389	3.99124	3.4353	3.65149	3.37475	3.684	3.3866	3.6019	4.13001	3.49077	4.0145	3.66506	3.66878	3.66297	3.37248	3.58563	3.89254	2.1747	3.30186	3.47279	4.3254
gp027	3.60407	3.40609	3.76217	3.57054	4.24949	4.02469	3.82059	3.81729	3.64504	3.63688	3.73928	3.88248	3.49245	3.99261	3.58179	3.9262	3.9207	3.58386	3.69906	3.75468	3.77321	3.86879	3.87865	3.61086	3.82033	3.32925	3.92996	3.59419	3.46454	3.86606	3.59299	3.77921	3.54523	3.57814	3.58772	3.39165	3.8705	4.01001	3.2402	3.6333	3.39169	4.32271
gp028	2.58126	2.87247	2.7695	3.13689	3.15735	3.0202	2.94917	2.75017	2.63212	2.92986	2.59678	3.10098	2.71315	3.38098	2.61204	2.8054	2.9441	2.39641	0	3.44197	3.46712	2.78234	2.71967	2.59207	3.1097	2.82336	2.73543	2.74672	2.98335	3.48135	2.77627	3.48126	2.98684	3.18284	2.95518	2.5192	2.90591	2.88758	0	0	2.30189	3.25035
gp029	2.9775	2.79421	2.78635	2.82598	2.95159	2.59696	2.72404	2.9333	3.02861	2.74354	2.86882	3.076	2.73472	2.69324	2.78992	3.08755	3.00764	3.06791	0	3.11546	2.91097	3.02224	0	2.79772	2.74684	2.72533	2.99669	2.8757	2.55663	3.24541	3.19061	2.77791	2.55766	2.8361	2.79816	2.75818	0	3.12095	2.84009	3.14433	0.29757	3.21422
gp033	2.24671	2.315	2.26572	2.44468	2.12681	0	3.19412	2.28626	2.2602	2.38013	2.27971	2.82668	2.11441	2.78213	2.11881	1.73953	2.41202	2.08462	2.93109	2.65001	2.32393	1.97675	0	2.39745	2.32999	2.37356	2.39084	2.17604	2.47642	3.1319	1.82673	2.78585	2.34731	2.59407	2.13525	2.25797	3.81226	4.0492	3.81307	2.94984	4.37974	3.67945
gp034	2.95457	3.24525	3.23126	3.3437	3.38988	3.46692	3.79795	3.24333	2.93697	3.32755	3.09974	4.1439	3.11862	3.6448	3.13939	3.08779	3.38791	3.0071	3.31535	3.60988	3.4342	3.32208	4.00695	3.3527	3.4183	3.15821	3.20529	3.08659	3.25861	3.68684	2.9695	3.69199	3.27309	3.42859	3.33666	3.25748	4.77323	4.99324	4.95391	4.39885	5.40354	4.74272
gp041	3.83479	4.13569	3.86042	4.3852	4.13065	3.84768	4.20121	3.99089	3.71342	4.22755	3.95275	4.05587	4.09237	4.24065	4.12816	3.82045	4.10113	3.63407	4.1141	4.24337	4.19697	3.92673	3.60098	3.93709	4.10142	4.15325	3.85064	4.10674	4.3318	4.42409	3.98101	4.27562	4.08092	4.37013	4.07917	4.14855	4.26547	4.23317	3.60193	4.5096	4.29579	4.4119
gp042	3.47933	3.33036	3.50829	3.34721	3.36294	3.08392	3.47196	3.4796	3.61123	3.34999	3.45998	3.36738	3.29984	3.48087	3.3205	3.56886	3.29681	3.57407	2.96888	3.50189	3.59067	3.62174	3.53404	3.47974	3.46412	3.229	3.63129	3.37291	3.31629	3.94162	3.59746	3.60357	3.38773	3.44986	3.39398	3.24197	2.98683	2.97482	0	0	0	2.7054
gp043	3.63617	3.9431	3.88151	4.17405	3.92066	3.69841	4.13275	3.95874	3.60272	3.99755	3.75789	4.12239	3.94392	4.20562	3.9709	3.81568	3.93299	3.46285	4.02493	3.91883	4.00463	3.96368	3.64463	3.79331	3.9618	3.90558	3.78991	3.88521	4.20646	4.15183	3.79335	4.01728	4.03173	4.23584	4.01332	3.90103	2.6858	3.4467	2.54123	3.31978	2.99654	3.44008
gp045	2.97066	3.57495	3.28688	3.94813	3.52008	2.70671	3.71051	3.24939	2.90474	3.81948	3.23585	3.67228	3.57789	3.71856	3.57659	3.08336	3.53135	2.51146	0	3.50612	3.44407	3.55173	3.05691	3.15652	3.41596	3.50475	3.09062	3.61515	3.9235	2.94438	2.8505	3.52063	3.71795	3.96392	3.63676	3.3538	0	0	0	2.97212	0	2.8603
gp048	3.62914	3.80913	3.82412	4.0856	4.07402	4.03113	4.10575	3.68014	3.95018	3.99997	3.60317	3.61666	3.91048	3.93338	3.81532	4.22465	4.16301	3.83122	3.64535	3.58554	3.68213	3.79818	3.71013	3.39143	3.69664	3.82622	4.09372	3.77466	4.10606	3.94438	3.36564	3.91399	3.89783	4.08901	3.77782	3.85917	0	0	0	2.495	0	2.81454
gp049	3.9842	3.43342	3.82151	3.23275	3.97471	4.46232	2.64725	3.58717	3.98705	3.75959	3.80433	4.16242	3.57322	3.34358	3.50081	4.17239	4.11195	4.09903	3.68044	3.39818	3.51941	3.88784	4.33491	3.65367	3.74071	3.48146	4.07682	3.52623	3.13696	2.94438	3.82798	3.60759	3.43509	3.17181	3.51323	3.19554	0	0	0	2.79603	0	2.97424
gp050	3.97775	4.05226	3.84129	4.25619	4.06782	4.14443	4.11922	3.9566	3.85369	4.0812	4.01537	4.28585	3.96353	4.04271	4.01972	4.0591	3.98932	3.92099	3.98446	3.93155	3.88571	4.02852	3.86983	4.03705	3.91108	4.05677	4.07376	4.03939	4.22684	3.98485	3.97253	3.96507	3.98259	4.23007	4.05109	3.91379	2.98683	3.75297	2.84226	3.44924	3.4437	3.63845
gp051	3.69896	3.6477	3.43456	3.8865	3.37196	0	3.78016	3.36977	3.47106	3.80619	3.59829	3.24621	3.58288	3.64876	3.71365	3.34676	3.48962	3.83473	3.13637	3.19407	3.3562	3.08543	0	3.37415	3.47541	3.69295	3.27235	3.63688	3.85955	3.44406	3.64339	3.45387	3.55248	3.72552	3.54264	3.63314	0	0	0	0	0	0
gp052	3.21677	3.91274	3.48484	4.33716	3.42174	3.17099	4.03849	3.52011	3.13634	4.07846	3.3889	3.39608	3.98639	3.9636	3.96582	3.33419	3.7027	3.12443	3.31535	3.57706	4.5547	3.8044	3.53404	3.78291	3.92262	3.92056	3.01176	3.86044	4.2794	3.74715	3.23532	3.46264	4.015	4.31433	3.8929	3.76587	0	0	0	0	0	0
gp053	2.68342	2.82591	2.65138	2.91369	2.6652	2.38847	3.22069	2.74959	2.51773	2.91702	2.68148	2.50585	2.82293	2.89897	2.75773	2.44007	2.59954	2.78829	3.42043	2.97207	3.15111	2.72896	0	2.73265	2.73083	2.74301	2.22114	2.75805	3.14096	3.6871	2.89613	2.66287	2.72932	2.92787	2.78437	2.99855	0	0	0	0	0	0
gp054	3.80904	4.23194	3.9233	4.54104	3.70817	3.9099	4.12533	3.75325	3.90375	4.18895	3.89664	3.12389	4.20379	4.22814	4.31172	3.96879	4.07055	3.88275	3.80801	3.81799	4.21847	3.79411	3.23301	4.03135	3.9347	4.31962	3.95979	4.27197	4.70538	4.25173	3.745	4.03285	4.39704	4.58577	4.20927	4.14152	0	0	0	0	0	0
gp055	4.03798	3.77078	3.72564	3.0428	3.4427	3.74521	3.15039	3.66112	4.01471	3.45597	3.84084	3.94507	3.59947	3.22662	3.55275	3.9047	3.38517	4.21831	3.64062	3.54624	3.44379	3.57042	3.52967	3.81832	3.52346	3.68363	3.85609	3.62237	3.17833	3.55892	4.03472	3.50535	3.46308	3.12154	3.58136	3.8797	0	0	0	0	0	0
gp056	4.61623	4.01834	4.17703	3.21863	3.06585	3.17099	2.73877	4.37597	4.20628	3.5215	4.5426	2.98297	4.14805	3.0489	4.09193	4.02425	3.34422	4.52528	3.60546	3.81089	3.88262	4.14833	0	4.26947	4.07485	4.17975	4.15315	4.19386	3.64904	3.54644	4.4894	3.83309	3.94278	3.26934	4.15283	4.34175	0	0	0	2.75268	0	0
gp057	4.57316	4.04191	4.14925	3.22408	3.00041	2.53272	3.19158	4.27434	4.20419	3.5316	4.39796	2.50585	4.14416	3.04146	4.05816	3.74008	3.04052	4.59155	3.64826	3.86291	3.87204	4.02054	0	4.30805	4.00115	4.17249	4.15351	4.15386	3.69613	3.45492	4.47107	3.23033	3.87293	3.27698	3.99336	4.22756	0	0	0	0	0	0
gp058	4.08595	4.46549	4.15927	4.7477	3.89308	3.91528	4.48561	4.00951	4.00572	4.41429	4.20005	3.10791	4.44548	4.46569	4.52145	4.27145	4.17967	4.18226	4.00795	3.95452	4.16071	3.96449	3.05691	4.1649	4.10008	4.49642	3.95209	4.38973	4.92941	3.99822	4.08907	4.31885	4.55782	4.76943	4.49801	4.34092	0	0	0	0	0	2.35306
gp059	3.47791	4.04492	3.66608	4.35164	3.59205	3.70965	4.03426	3.59263	3.50703	4.12587	3.66274	2.80688	3.99071	4.03133	4.06637	3.66042	3.83014	3.5238	3.73916	3.60115	3.97801	3.55063	2.54358	3.59539	3.54889	4.03622	3.49083	4.00112	4.36717	3.8229	3.52516	3.9907	4.08167	4.3348	4.04699	4.02228	2.6858	0	0	2.79603	0	2.23321
gp060	3.2786	3.61896	3.39832	3.71307	3.4432	2.86996	3.8088	3.23204	3.4116	3.50914	3.46356	3.04991	3.4497	3.48489	3.55827	3.35869	3.4127	3.58851	2.78473	3.46834	3.32607	3.36876	2.75588	3.4772	3.38865	3.46802	3.52352	3.49475	3.61083	3.66177	3.4936	3.45345	3.43157	3.78904	3.45725	3.44996	0	0	0	2.495	2.5986	2.7054
gp061	3.29043	3.21667	3.37003	3.32089	2.95825	3.0892	2.57128	3.36885	3.31361	3.17633	3.3545	3.00827	3.29531	3.31239	3.22665	3.41235	3.3137	3.23433	2.0825	2.93011	3.24042	3.24626	0	3.10768	3.32011	3.26731	3.17792	3.25757	3.35439	2.9221	3.17123	3.20526	3.19881	3.44242	3.14908	3.08335	0	0	0	0	0	1.8603
gp062	4.54796	4.24357	4.31816	4.34915	4.28922	4.39656	4.11898	4.25606	4.54032	4.18796	4.44367	4.04346	4.2556	3.96555	4.41233	4.54784	4.30879	4.54823	3.73843	3.91301	4.03998	4.46879	4.18153	4.42113	4.3024	4.16091	4.54488	4.37392	4.37288	3.75729	4.59546	3.7918	4.20849	4.29962	4.22654	4.19985	2.98683	0	0	0	0	2.90169
gp063	3.34189	3.77807	3.47521	4.12329	3.89338	3.34708	4.00882	3.48498	3.25478	3.8473	3.46835	3.91205	3.78656	3.79682	3.85817	3.4558	3.64735	3.35959	3.10252	3.73809	3.99149	3.57786	2.73816	3.48097	3.60366	3.78037	3.35338	3.71408	4.18262	3.87226	3.34351	3.85701	3.85135	4.08634	3.76059	3.77057	2.87333	3.83945	0	2.79603	3.35789	3.19536
gp064	2.77774	2.98264	2.86896	2.98319	2.88699	2.86996	3.27659	2.668	2.72732	2.87333	2.83788	2.80688	2.89082	2.95356	2.72123	2.65275	2.94447	2.92464	0	3.12114	3.34902	3.01435	0	2.86139	3.36014	2.85531	2.63282	2.87214	2.99439	3.44452	2.75128	3.09079	2.90466	3.23619	2.99851	3.08918	0	2.57688	0	0	0	0
gp065	4.58488	4.04364	4.3131	4.11198	4.1839	4.51054	3.78734	4.36688	4.80827	4.06289	4.35956	4.72131	4.16118	4.12879	4.24144	4.55912	4.23753	4.66782	4.22374	4.13351	4.20016	4.48093	4.41409	4.3317	4.19427	3.95542	4.5604	4.43878	4.05109	3.97172	4.29567	3.94633	4.04566	4.0763	4.0514	4.26256	3.89478	4.18068	3.61385	4.17105	4.20878	4.57472
gp067	3.22079	3.11741	3.24769	3.32127	3.31465	3.62583	3.49312	3.13208	3.18835	3.4188	3.23429	3.75781	3.15581	3.09672	3.25615	3.22519	3.46609	3.21025	3.43595	3.3183	3.44736	3.41875	2.75588	3.17421	3.21383	2.92669	3.23249	3.2162	3.31995	2.64335	2.94867	3.39425	3.13564	3.25905	3.30586	3.45106	4.08322	4.20537	3.95687	4.08684	4.28555	4.30453
gp068	3.27002	3.10624	3.26987	3.31697	3.3553	3.64811	3.48202	3.1232	3.26199	3.4012	3.28058	3.85635	3.16015	2.95087	3.27614	3.26727	3.43047	3.25322	3.33868	3.28744	3.35836	3.43456	0	3.15972	3.30897	2.93419	3.31141	3.24833	3.30909	0	2.91731	3.15452	3.14176	3.21955	3.3138	3.43226	3.97651	4.21372	3.92199	4.07053	4.24205	4.20055
gp069	3.53791	3.75327	3.58822	4.08064	3.46209	3.65148	3.57657	3.50221	3.59355	3.70146	3.50423	3.82189	3.70344	3.72046	3.77681	3.61157	3.49336	3.57022	3.48694	3.34489	3.93839	3.89546	0	3.66049	3.64823	3.73778	3.552	3.73263	4.178	3.57818	3.441	3.55823	3.87144	4.09503	3.77396	3.84435	3.70158	3.83957	3.49547	3.73028	4.07976	3.87532
gp071	2.94138	3.32462	3.1708	3.53614	3.10933	3.54144	2.99645	3.11421	2.98681	3.40657	2.99814	3.59798	3.29551	3.49331	3.39423	3.04255	3.36281	2.75695	3.35692	3.12675	3.17593	3.07592	2.18185	3.03437	3.05761	3.29147	3.12138	3.19852	3.658	3.18242	3.07793	3.16161	3.26409	3.6176	3.30327	3.27717	2.98027	3.5383	2.79891	3.27243	3.71852	3.80567
gp072	4.01097	3.67895	4.05136	3.86782	4.08789	4.66542	4.05974	4.15513	4.05415	4.02405	3.91631	4.12487	3.81394	4.08362	3.75905	4.32357	4.28205	3.88911	3.93237	3.91888	3.98969	4.0676	4.5216	3.87532	3.98102	3.727	4.04927	3.72574	3.79485	3.9923	3.76781	3.82581	3.85685	3.85783	3.93195	4.04634	0	2.5383	0	0	3.13579	3.16436
gp073	3.95088	3.56066	4.15479	3.92458	4.1452	4.75978	3.90043	3.98738	4.1395	3.93821	3.84601	4.06102	3.77569	4.01188	3.65983	4.28678	4.44259	4.03302	3.95107	3.92184	3.9431	4.08067	4.16717	3.70132	4.01816	3.65142	4.15758	3.64922	3.8964	3.77282	3.63442	3.59036	3.75936	3.77717	3.87895	3.71535	0	2.37966	0	2.79603	0	2.97424
gp074	3.76223	4.57705	4.17179	4.91857	4.42835	4.18983	4.55831	4.09108	3.56317	4.61754	3.96681	4.11976	4.5331	4.54578	4.59643	4.0284	4.31709	3.56293	4.03946	4.02993	4.73924	4.20064	3.60098	4.21665	4.26618	4.5756	3.78952	4.4556	4.99595	4.35918	3.8655	4.33129	4.67287	4.93641	4.50075	4.50112	3.58889	3.7357	3.01835	3.57418	2.89963	3.56471
gp075	2.83443	3.40247	3.07488	3.66771	3.95489	3.3432	0	3.0665	2.82459	3.4894	2.95915	3.70861	3.18053	3.51581	3.35247	3.17039	3.52413	2.88248	3.13637	3.30845	3.15139	2.56926	3.0598	3.06196	3.34675	3.2923	3.33206	3.22968	3.47582	3.59759	3.23685	3.54696	3.29774	3.62063	3.32611	3.03118	3.18549	4.09183	0	3.44924	3.49375	3.24051
gp076	3.72086	3.47959	3.34412	3.63667	3.65976	3.5669	3.6675	3.66998	3.90622	3.48883	3.65306	3.31921	3.58414	3.37898	3.56167	4.13169	3.56441	3.84157	3.31247	3.48018	3.28593	3.48425	3.60098	3.60424	3.62239	3.29192	4.02384	3.59584	3.56725	3.51453	3.78458	3.48423	3.50995	3.25834	3.57232	3.64838	3.32229	3.01384	0	2.495	0	1.8603
gp077	4.11475	4.06422	4.02857	4.31058	3.71344	3.68287	4.26897	3.9882	3.98529	4.05416	4.18056	3.10791	4.07322	4.12471	4.16049	4.14314	3.84962	4.06899	3.4374	3.69981	3.87939	3.99316	2.98803	3.9975	3.91577	4.07837	3.99469	4.00233	4.14085	4.0268	4.05338	3.66947	3.9019	4.0762	4.04762	4.05622	0	0	0	3.28528	0	2.63845
gp078	3.8671	3.69907	3.81211	4.04976	3.31562	3.34708	2.9743	3.45742	3.93503	3.75003	3.9349	3.31361	3.56467	3.74765	3.7788	3.77828	3.45201	4.06541	3.38963	3.34123	3.47727	3.47235	0	3.64514	3.61226	3.71546	3.66471	3.81485	3.8932	3.34232	3.87186	3.44534	3.75547	4.10219	3.65392	3.61379	0	0	0	0	0	0
gp080	4.27681	3.86671	4.15039	3.65292	3.70583	3.7309	3.62826	4.04314	4.46568	3.5998	4.06831	4.38006	3.85208	3.56872	4.10511	4.28054	3.66308	4.30375	3.13637	3.58117	3.91653	4.12728	3.65897	4.10566	3.89059	3.80153	4.16995	4.0036	3.72351	3.59501	4.28899	3.67824	3.66667	3.74331	3.96127	3.83308	3.15267	3.6313	2.84226	2.79603	2.89963	3.82864
gp082	3.35426	3.39167	3.4707	3.41083	3.49744	3.52446	2.77884	3.3408	3.3197	3.50183	3.35887	4.55812	3.35998	3.4646	3.49777	3.41535	3.55091	3.46266	3.35561	3.48304	3.37919	3.33815	3.64011	3.37143	3.40887	3.28313	3.37688	3.32073	3.42093	3.13935	3.35512	3.39762	3.2683	3.48198	3.36894	3.26527	3.8619	3.86669	3.63779	3.75555	3.79436	4.25756
gp083	2.76227	3.38591	3.12028	3.66009	3.82785	3.39153	3.66614	2.97081	2.57383	3.74082	2.97083	4.54512	3.52507	3.74725	3.48294	3.09314	3.79793	2.95227	3.49336	3.63177	3.11903	2.99595	4.42159	3.29108	3.32848	3.52792	3.15081	3.41578	3.86359	3.24613	2.83397	3.38222	3.51101	3.8447	3.38247	3.46392	3.27239	3.80167	0	0	3.98892	2.79681
gp084	3.41769	3.29299	3.3565	3.35803	4.05789	4.01609	2.83799	3.13459	3.72116	3.53809	3.61482	4.86563	3.2811	3.34831	3.39589	3.56478	3.99346	3.60942	3.7813	3.73465	3.48419	3.01573	4.48715	3.66196	3.62566	3.31175	3.62003	3.38736	3.05083	3.40877	3.44775	3.36702	3.43937	3.18196	3.2777	3.01902	4.55849	4.88174	3.85762	4.67944	4.22149	4.88319
gp085	3.00594	2.73112	2.73949	2.4797	2.94682	0	0	2.68367	3.03219	2.52794	2.95148	3.44785	2.51573	2.70119	2.7277	2.6546	2.66544	3.02905	2.82657	2.8619	2.48818	2.4675	3.50716	2.77957	2.93425	2.58712	2.8148	2.77145	2.38276	0	3.24536	2.23033	2.48424	2.66463	2.5885	0	3.03411	2.57688	0	0	2.5331	2.93475
gp086	3.42741	3.62665	3.47844	3.84015	3.72327	3.73585	4.05052	3.49898	3.47851	3.6994	3.49472	4.04367	3.61004	3.80179	3.61194	3.37045	3.64848	3.45264	3.78959	3.53202	3.47668	3.53951	3.84461	3.34744	3.5626	3.63359	3.23802	3.53988	3.83887	3.59759	3.43052	3.93976	3.57028	3.93485	3.58156	3.66485	2.98683	3.27585	0	2.79603	2.99654	3.67984
gp087	3.04977	3.70841	3.45069	3.92533	3.73228	3.26031	3.73058	3.40512	3.05654	3.73692	3.29835	4.05181	3.65254	3.75521	3.70079	3.26905	3.65387	3.31286	3.13637	3.51781	3.71348	3.31399	3.40327	3.37286	3.51107	3.61095	3.23286	3.54915	4.19201	3.64335	3.29516	3.53347	3.76031	4.12968	3.76946	3.4268	0	2.75297	2.84226	2.79603	3.03237	3.45832
gp088	3.06943	3.30236	3.03875	3.73246	3.26534	0	2.73877	2.98321	2.88554	3.53691	3.14775	3.05648	3.28442	3.29268	3.41505	2.99101	3.21204	3.19421	3.24188	3.06181	2.88551	2.59274	2.45485	2.82199	2.74942	3.23794	2.93776	3.37608	3.70972	2.842	3.11315	3.23139	3.17018	3.42524	3.25142	3.27881	0	0	0	0	0	0
gp089	3.92712	3.97719	3.79855	4.31816	3.5357	3.43777	3.97125	3.57477	3.74553	3.9802	3.89696	2.96824	3.93898	4.06635	4.05587	3.70335	3.8567	4.10241	3.27468	3.37398	3.64335	3.67276	3.54074	3.75875	3.5109	4.04917	3.65909	4.00179	4.33395	3.9069	3.85606	3.7748	4.00275	4.19605	3.96515	3.8572	0	0	0	0	0	2.46236
gp092	3.22241	3.78744	3.48997	4.10769	3.46819	3.05465	3.73877	3.45052	3.2945	3.85531	3.34745	3.03433	3.88082	3.76433	3.88435	3.30061	3.63435	3.28268	3.41779	3.51696	4.31967	3.5235	0	3.63615	3.65322	3.82696	3.2668	3.69349	4.37198	3.08004	3.43883	3.9542	3.95428	4.17175	3.718	3.58622	0	2.57688	0	0	0	2.16133
gp093	3.87615	4.4622	4.2042	4.78907	4.25168	4.16706	4.36535	4.16759	3.80315	4.48417	4.04773	4.34031	4.48246	4.47095	4.50731	4.06976	4.4163	3.75038	4.11142	3.96148	4.29104	3.92405	4.22117	4.10087	4.03966	4.46752	4.08729	4.37428	4.92447	4.14092	3.9633	4.37054	4.58861	4.80965	4.43287	4.44046	2.98683	3.94601	0	3.09706	3.52802	3.02791
gp095	4.08025	4.23578	4.15876	4.4184	4.57416	4.44997	4.43892	4.0779	4.10217	4.2973	4.18948	4.42084	4.22815	4.45772	4.29948	4.22101	4.34989	4.02169	4.23502	4.33839	4.28284	4.14234	4.33544	4.1499	4.25141	4.22443	4.20308	4.16124	4.50131	4.43574	4.13797	4.23191	4.267	4.46239	4.27621	4.25644	4.31694	4.84085	3.93252	4.2585	4.61299	4.56912
gp096	3.77286	3.57086	3.31221	3.6605	3.01026	2.56893	3.43774	3.28528	4.05702	3.49714	3.42585	2.59927	3.35332	3.36547	3.50944	3.71553	3.09517	3.89595	3.1817	2.99745	2.89917	3.26591	2.89786	3.6075	3.43517	3.43798	3.72905	3.54982	3.38569	3.23143	3.65156	3.10421	3.35048	3.60075	3.12682	3.25179	0	0	0	0	0	0
gp097	3.94933	4.11889	3.93538	4.44141	3.66322	3.89335	3.9804	3.74775	3.9049	4.17345	3.99478	3.20482	4.09479	4.11777	4.15721	3.91042	3.88319	4.08568	3.48856	3.53521	3.98021	3.6158	3.35794	3.79311	3.85613	4.15299	3.80388	4.0422	4.46465	3.83068	3.90298	3.7916	4.05189	4.40855	4.01352	4.00268	0	0	0	0	0	0
gp098	4.01809	4.198	3.97089	4.47524	3.87373	3.98122	4.11729	3.73436	4.19923	4.20558	4.12247	3.18829	4.10971	4.17024	4.26785	4.16518	3.96434	4.26285	3.84366	3.5205	3.82599	3.82389	4.06495	4.01091	3.78281	4.16186	4.15899	4.15883	4.5103	3.78885	3.99277	3.91377	4.16215	4.43325	4.06631	4.01238	0	0	0	0	0	0
gp099	4.62806	4.18712	4.45327	3.90457	3.97244	4.08744	3.61614	4.14772	4.66814	3.92075	4.58781	3.66721	4.14501	3.70537	4.29304	4.48499	3.93494	4.9027	3.90229	4.05095	3.81628	4.34651	3.98633	4.31852	4.24964	4.2903	4.51269	4.29743	3.87253	3.06604	4.62569	3.94244	4.0891	3.90461	4.11056	4.51645	0	0	0	0	0	0
gp100	3.82137	3.86336	3.51743	4.04484	3.58118	3.46656	3.52929	3.48562	3.67756	3.87837	3.77037	2.5765	3.76227	3.80673	3.84158	3.51135	3.54918	3.85456	3.13637	3.30116	3.28136	3.11112	3.74236	3.5788	3.38897	3.83093	3.38488	3.78202	4.03118	3.48844	3.65483	3.70827	3.7246	3.97889	3.69358	3.62521	0	0	0	0	0	0
gp101	4.82032	4.64464	4.89411	4.82796	4.23753	3.77305	4.55215	4.67242	4.84905	4.54946	4.89866	3.58091	4.69885	4.6152	4.83925	4.77059	4.40756	4.77441	4.46155	4.44494	4.54187	4.70657	4.03464	4.68611	4.76895	4.6667	4.73248	4.74413	4.99365	4.67089	4.81774	4.53973	4.69259	4.87553	4.68079	4.75797	0	3.17894	0	4.01561	2.5986	0
gp102	3.1966	3.51195	3.33575	3.77705	3.83908	3.34708	3.66853	3.3806	3.19183	3.57275	3.35885	3.60633	3.56255	3.77673	3.63701	3.35427	3.56954	3.25633	3.23328	3.16762	3.45504	2.8288	3.58711	3.39586	3.4337	3.56192	3.27236	3.45197	3.81643	3.45581	3.34054	3.37418	3.44744	3.74033	3.40511	3.56205	0	3.72993	0	3.50104	3.72619	3.33728
gp103	3.13505	3.42234	3.30336	3.62469	3.76624	3.47202	3.60308	3.30882	3.1399	3.45257	3.31448	3.5116	3.51815	3.53091	3.48222	3.31752	3.49699	3.19604	3.13854	3.19025	3.38889	2.75741	3.53404	3.34381	3.41068	3.46054	3.20312	3.3228	3.68095	3.2868	3.2622	3.54131	3.37845	3.62746	3.3495	3.4984	0	3.47533	0	3.495	3.64762	3.30356
gp104	2.93041	2.91966	2.82236	2.90379	3.41457	2.56893	3.0398	2.7939	2.78886	2.71548	2.92326	2.36917	2.7045	2.70221	2.64746	2.69406	2.94976	2.88709	3.29019	3.05546	2.7151	3.24545	0	2.89727	2.97434	2.72932	2.71931	2.8096	2.55681	3.5561	3.02223	2.79364	2.80301	2.9169	2.8896	3.02745	0	3.054	0	0	2.5986	2.16133
gp105	3.2407	3.15172	3.2351	3.09466	3.7709	3.50005	3.32423	3.13433	3.4107	3.18202	3.39517	3.80572	3.26824	3.14154	2.99346	3.22417	3.32698	3.16732	3.31247	3.45588	3.41497	3.37514	3.60098	3.35261	3.27277	3.07842	3.36335	3.28731	2.85588	3.08425	2.7975	3.66767	3.28226	3.30983	3.17269	2.78815	1.58889	3.13499	2.54123	2.79603	3.11908	3.30777
gp106	3.4555	3.24306	3.24355	3.40696	4.46177	4.00847	3.56246	3.27773	3.57107	3.16204	3.24019	4.04025	3.20835	3.29851	2.98673	3.28836	3.76624	3.2142	3.63053	3.77033	3.42121	3.21228	4.62476	3.33679	3.41374	3.36278	3.46122	3.20677	2.86005	3.50865	2.94909	3.64679	3.23138	2.64748	3.11761	3.18609	3.7272	3.97177	0	3.495	4.01349	3.61823
gp108	2.90933	2.54672	3.30692	2.5674	2.85641	3.17099	3.74595	2.28471	2.12972	2.79239	0.577354	3.82869	1.69095	2.81071	2.97818	2.71465	3.26263	1.70766	3.31198	3.12168	2.27434	3.20608	3.75298	2.67941	2.22203	0	2.74256	2.44736	2.94881	3.61924	3.4916	2.59982	2.65738	0.324424	2.67077	0	3.16148	0	0	2.495	3.23459	3.21479
gp110	5.07658	4.76366	3.82953	3.6646	3.55095	3.77916	3.0398	4.0705	4.80967	3.55251	4.48471	3.90673	4.65696	3.335	4.48378	4.30276	3.73853	4.93962	4.05502	3.91175	4.27977	4.61672	2.75588	4.89122	4.12424	4.42852	4.92307	4.46395	4.36863	3.5812	4.54778	4.13342	4.26048	3.39642	4.04011	4.25179	0	2.87791	0	2.495	2.89963	2.81454
gp111	3.52683	3.34996	3.38772	3.14402	3.43768	3.74075	3.0967	3.57382	3.87983	3.16574	3.30176	3.49855	3.34369	3.40829	3.30419	3.69027	3.18187	3.78816	3.13492	3.22017	3.34164	3.29098	3.53404	3.77078	3.39888	3.12031	3.88239	3.48614	2.6863	3.33117	3.60743	2.31651	3.02578	3.08752	3.21043	3.07333	0	2.87024	0	0	0	2.98676
gp113	0.464278	0.756536	0.678737	0.811461	0.776168	0.693869	1.40777	0.7227	0.697994	0.703734	0.771	0	0.655769	1.33809	0.647931	1.13343	0.672928	0.692571	0.960283	1.01901	0.876403	0	0.579793	0.779018	0.951852	0.551777	0.69859	0.644516	0.781491	0	0.728416	1.04351	0.758859	1.17752	0.65799	0.00999509	0.685805	1.17894	0	0.495	0.99654	1.18252
gp114	3.64256	3.97202	3.89345	4.26738	4.23695	4.26283	4.01138	3.78831	3.92665	4.05656	3.92551	4.65499	4.03737	4.1442	4.0531	4.0369	4.13072	3.7215	3.90845	3.87015	3.81507	3.62251	3.95892	3.78943	3.91819	4.01163	3.95165	4.03986	4.20396	3.93159	3.76121	3.98471	4.0163	4.22542	3.99451	3.9687	3.64485	4.45741	3.44432	3.98186	4.25556	4.10589
gp115	3.69895	3.23841	3.73992	3.43851	3.76447	3.94684	3.20316	3.58897	4.0891	3.33366	3.30065	3.37469	3.56776	3.35656	3.31139	4.03864	3.71526	4.0507	3.47978	3.01044	3.32389	3.53785	3.70201	3.37672	3.61456	3.31553	3.98939	3.43072	3.07536	1.99873	3.54297	3.31244	3.19535	3.05561	3.23242	3.60273	0	0	0	0	0	0
gp116	3.94009	3.52496	3.99384	3.74837	4.16267	4.11556	3.55962	4.02091	4.23891	3.68548	3.62764	3.7385	4.04331	3.6365	3.51972	4.43348	4.36212	4.11109	3.97971	3.3979	3.4252	3.89569	3.65897	3.32367	3.73155	3.81996	4.53844	3.67967	3.821	3.2835	3.74363	3.54849	3.66683	3.72546	3.58005	3.98758	0	0	0	0	0	0
gp117	3.40538	3.06127	3.33384	3.31508	3.50561	3.17459	3.23937	3.27335	3.66862	3.14973	3.09909	2.99204	3.22711	2.97866	2.94064	3.49315	3.48578	3.24649	3.35779	3.10204	2.99729	3.05687	3.0598	2.81468	3.19701	3.20723	3.54343	3.06942	2.99588	3.00883	2.71057	3.06573	3.06652	3.20005	3.06535	3.2823	0	0	0	0	0	0
gp118	2.5922	2.42865	2.60272	2.51558	2.72209	0	2.93096	2.65339	2.95479	2.40787	2.52311	2.95763	2.58161	2.15403	2.22475	2.73974	2.78514	2.45326	2.90967	2.49096	2.63715	2.61415	2.75877	2.30739	2.46659	2.5079	2.69335	2.39021	2.1989	2.41174	2.19564	2.34454	2.56538	2.61754	2.54892	3.04862	0	2.77416	0	2.12847	2.07572	3.14743
gp119	3.37696	3.83736	3.77343	4.11329	3.94497	4.08392	3.77098	3.59745	3.82215	3.85119	3.51894	4.84787	3.92447	3.93366	3.86823	3.61346	4.05501	3.93757	3.91825	3.82167	3.8802	3.77609	3.95491	3.78021	3.94473	3.78633	3.60572	3.75195	4.21955	3.92875	3.97792	3.6423	3.96301	4.10847	3.80523	3.70539	4.18038	4.41805	3.50502	4.49478	4.25885	4.74687
gp122	4.35695	4.06169	4.11941	3.91669	4.0159	4.15084	3.9046	4.15	4.43971	3.85953	4.10766	4.31825	4.08059	3.91359	3.95151	4.21361	3.82964	4.45707	3.89059	3.81112	3.74667	4.11583	0	4.23848	3.97947	4.07871	4.29377	4.07151	3.95162	3.67757	4.46056	3.8605	3.84586	3.86256	3.93734	3.99699	4.35092	4.53887	4.00363	3.92636	4.45666	4.59293
gp123	3.47988	3.93748	3.64857	4.18431	4.17018	3.56893	3.90302	3.70199	3.33789	3.98099	3.63708	3.73467	3.91272	4.12633	3.96777	3.74899	3.96878	3.43574	3.99078	3.65235	3.79584	3.91107	3.86083	3.71757	3.81429	3.98014	3.74915	3.86264	4.29039	4.0905	3.4353	3.97713	3.9822	4.23146	3.91781	3.7213	4.33863	4.21687	4.07041	4.21854	4.49391	4.62818
gp124	3.31081	3.33891	3.25837	3.3764	3.83827	3.04605	3.13671	3.34003	3.32554	3.34056	3.34261	3.87691	3.22089	3.4127	3.26786	3.4673	3.57576	3.32634	3.47715	3.53143	3.53003	3.52809	3.23301	3.37128	3.55413	3.23483	3.55646	3.28562	3.18218	3.76304	3.39919	3.63928	3.4136	3.43337	3.34131	3.44007	3.98683	3.47997	3.38633	3.72545	4.06842	4.30737
gp125	2.89794	2.86879	2.88169	2.95678	3.33564	0	3.32083	3.0574	2.69057	2.93632	2.89167	2.79215	2.97743	3.05802	2.74112	2.99659	2.92311	2.70921	3.45094	3.16672	3.18329	3.10526	2.91825	2.92593	3.0696	2.85978	3.01452	2.8358	2.68392	0	2.92833	3.03915	2.84909	2.977	2.8874	3.17136	3.12514	3.32816	3.56366	3.65003	3.64782	3.73617
gp126	2.96044	3.19723	3.11354	3.36898	3.65666	3.46177	3.02657	3.21438	2.92683	3.32653	3.1083	3.55169	3.223	3.42509	3.2598	3.30479	3.1861	3.00725	3.48759	3.40644	3.388	3.60951	0	3.22411	3.5574	3.092	3.29996	3.21342	3.28991	3.54426	3.08491	3.58117	3.30327	3.34708	3.21791	3.52201	3.19231	3.42384	3.49547	3.4569	3.65665	4.00053
gp127	3.61316	3.56834	3.68225	3.72427	3.77335	3.98612	4.12793	3.92363	3.54867	3.79604	3.65254	3.47974	3.68166	4.20966	3.5718	3.63985	3.74406	3.25992	3.96568	3.93925	3.85273	3.78891	0	3.69312	3.87018	3.53376	3.55339	3.55965	3.65504	4.21707	3.66837	4.203	3.83006	3.85098	3.66871	3.63211	3.6858	3.52407	3.38633	3.81722	3.81198	4.42277
gp128	4.04932	3.63769	3.82008	3.5572	3.47674	2.829	3.34083	3.61744	3.9325	3.49031	3.91605	3.46009	3.71114	3.53998	3.70882	3.62535	3.44648	4.0776	2.09859	3.60372	3.58861	3.9288	0	3.69812	3.5377	3.65038	3.80188	3.75547	3.76772	3.64335	3.73232	3.55086	3.55424	3.67591	3.59444	3.6393	1.94108	1.80733	3.06886	3.40348	3.47017	4.08351
gp129	3.94552	3.47443	3.88492	3.19316	4.5131	4.03133	3.27784	3.53886	4.08635	3.77111	3.90323	3.99926	3.83522	3.37377	3.79026	3.88748	4.19277	3.73451	4.24183	3.74989	3.92566	3.32733	4.37872	3.99054	3.74749	3.98579	3.93576	3.69307	2.85766	2.64335	3.92098	3.31651	4.17954	3.07576	3.81781	3.58829	3.9595	4.21781	3.62041	4.26585	4.34543	4.79065
gp130	3.99412	3.58114	3.89323	3.29093	4.53037	3.8242	3.08053	3.49206	4.16587	3.68893	3.95475	4.0981	3.85148	3.2857	3.89796	3.81996	4.19663	3.86109	4.1166	3.81031	4.00904	2.78762	4.57266	4.0888	3.84784	4.03601	3.98284	3.72639	2.7215	0	3.7742	3.25935	4.21091	3.04375	3.82702	3.45059	4.03391	4.38946	3.90183	4.43929	4.48714	4.83786
gp133	2.67223	2.76528	2.7022	2.73668	3.03349	0	3.12497	2.76008	2.8505	2.68086	2.76755	3.22848	2.57664	3.13968	2.67993	2.85021	2.95028	2.65411	3.05893	2.82565	2.65248	2.42255	3.42303	2.85299	2.80013	2.44163	2.96264	2.75045	2.654	0	2.82701	3.02295	2.93229	2.79613	2.70887	2.48712	3.38303	3.03173	0	3.53521	3.25852	4.02777
gp138	3.55181	3.50411	3.57646	3.58339	3.43403	2.86996	3.75899	3.50128	3.5217	3.51399	3.58905	2.47277	3.52038	3.60832	3.5473	3.29708	3.30493	3.71789	3.42567	3.65637	3.58217	3.34158	3.80871	3.3622	3.40843	3.49006	3.4961	3.55546	3.82009	3.53987	3.58565	3.79102	3.54165	3.69727	3.52282	3.38785	0	0	0	0	2.5986	3.0055
gp139	3.10339	3.38789	3.23224	3.54318	3.16039	3.21238	3.18489	3.12864	3.18487	3.33696	3.18486	2.74053	3.40982	3.07209	3.39151	3.13156	2.98098	3.29355	3.09382	2.86809	2.85619	3.29626	3.65897	3.13749	2.73901	3.37913	3.1243	3.30533	3.63896	2.94438	3.0322	3.15115	3.44231	3.61879	3.23999	2.79461	0	0	0	0	0	1.9641
gp140	3.84651	4.09361	4.01043	4.36073	3.95089	3.88223	4.28997	3.95305	3.8382	4.14805	3.91655	3.56654	4.10452	4.27496	4.13252	3.90804	4.03774	3.73114	3.68044	4.00595	4.02777	3.96126	3.65897	3.80252	3.98525	4.16788	3.90849	4.06181	4.43521	4.15842	3.7876	4.17316	4.09324	4.32984	4.12466	3.94696	0	2.27585	0	3.27315	2.8404	3.32509
gp141	3.38319	3.08404	3.18145	2.93739	2.97655	3.14795	3.53488	3.31101	3.18731	2.95028	3.34838	0	2.97756	3.4056	3.08226	3.10237	3.0761	3.29274	3.34499	3.38897	3.2122	3.23827	3.6633	3.32336	3.3906	3.01593	3.32672	3.12826	2.96777	3.34232	3.42036	3.3388	3.09698	3.03013	3.20174	2.96424	2.89532	3.15207	0	3.98228	2.99654	3.61243
gp143	3.69342	3.36392	3.4387	3.25406	3.22077	2.52638	2.78278	3.47772	3.71904	3.2858	3.49473	3.24304	3.39829	3.42152	3.29825	3.58791	3.28383	3.75909	3.28662	3.31966	3.36529	3.48308	3.05691	3.54698	3.57763	3.34385	3.60143	3.46442	3.09065	3.68395	3.81664	3.43555	3.34882	3.28976	3.4387	3.42846	2.6858	3.24852	0	3.6377	0	3.10925
gp144	3.06876	3.37446	3.50587	3.43731	3.47517	3.50678	3.60308	3.1898	3.09579	3.43103	3.35057	3.81491	3.19678	3.66121	3.09598	3.40387	3.24516	3.15728	3.91897	3.55281	3.46251	3.64925	3.05691	3.64919	3.46419	3.20613	3.30171	3.36142	3.27052	3.78364	3.24526	3.64066	3.40171	3.48314	3.37135	3.25477	4.54326	4.47456	4.45436	4.30858	5.10894	4.33124
gp146	3.64959	3.2937	3.38787	2.71738	3.14263	2.86996	2.73877	3.25455	3.58629	2.955	3.30937	2.9169	3.1031	2.74817	3.13938	3.30072	2.95117	3.75716	2.83244	3.16521	3.09974	3.32952	3.35649	3.41222	2.94194	3.03495	3.42828	3.31258	2.85677	3.55927	3.66758	3.27332	2.86324	2.80734	2.95686	2.44616	3.423	2.97482	0	3.64113	2.58087	2.39433
gp148	2.97783	3.13856	3.42944	3.51247	4.27996	3.89826	3.51908	3.16152	3.22229	3.47713	3.22156	4.79291	3.01907	3.3812	3.28559	3.61261	3.94824	3.29863	3.73807	3.58326	3.25415	3.48484	4.37113	3.54418	3.4398	3.11662	3.74685	3.28037	2.63454	3.24541	3.20519	3.33521	3.23348	3.17977	3.41572	2.96424	4.51382	4.92682	4.06145	4.48222	4.77499	4.4488
gp149	5.11682	4.50717	4.84829	3.67564	4.33812	4.4682	3.49056	4.68388	4.8226	4.1227	5.00789	4.07323	4.67544	3.38773	4.66202	4.67757	4.21495	5.1824	4.45783	4.52361	4.38657	4.67733	3.85163	4.73716	4.70377	4.62673	4.59469	4.59078	4.14929	3.18741	5.16627	4.06856	4.43433	3.48095	4.51909	4.74866	3.1467	3.66802	0	4.17588	3.6969	4.19322
gp150	4.86144	4.28547	4.25189	2.9937	3.68193	3.87913	2.7627	4.4078	4.49662	3.69188	4.63238	3.52009	4.26953	3.22917	4.23977	4.20491	3.64652	4.71481	3.86729	4.02399	3.95011	4.21326	3.41166	4.4608	3.94111	4.18188	4.30084	4.44875	3.56368	3.37948	4.59206	3.73459	4.07092	3.1227	4.22035	4.12337	3.74461	4.13361	2.84226	4.87984	3.87449	4.05331
gp151	5.058	4.38128	4.85139	3.48923	4.10385	4.50735	3.51377	4.79778	4.8854	4.21018	4.89416	3.97118	4.65001	3.50723	4.53948	4.60151	4.1726	5.00705	4.32493	4.44628	4.35341	4.53421	3.93198	4.66808	4.56983	4.6109	4.64729	4.61119	4.34126	3.5963	4.84299	4.08594	4.31336	3.53611	4.36138	4.55687	3.28786	2.87791	2.84226	3.23694	3.0169	2.16133
gp152	3.48634	3.51191	3.42636	3.41763	3.80188	3.89074	3.75259	3.55874	3.57548	3.50577	3.36534	3.77357	3.35283	3.78222	3.33774	3.73375	3.4765	3.58806	3.37941	3.61568	3.59978	3.53368	3.89534	3.48004	3.55033	3.40447	3.62109	3.3712	3.27592	3.67811	3.36518	3.788	3.45619	3.59604	3.3836	3.65787	3.38477	3.5063	0	3.6159	2.89963	3.89549
gp154	3.8768	3.92471	3.94764	4.14321	4.10454	4.21034	4.08414	3.94521	3.79036	4.03797	3.91872	3.8866	3.9754	4.04404	3.97353	3.96245	4.10397	3.72991	3.78196	3.95801	3.95275	3.64351	3.96	3.88733	4.01907	3.95772	3.90189	3.86093	4.05288	4.07876	3.83173	3.86058	3.94515	4.06994	3.89371	3.96837	0	2.57688	0	3.27747	2.5986	3.44857
gp156	4.91306	4.31538	4.60482	3.64244	4.28206	4.52066	3.28284	4.55749	4.74298	4.04313	4.75802	4.04572	4.5446	3.95058	4.45742	4.54166	4.20102	4.87695	4.3185	4.48506	4.27253	4.44536	4.15659	4.45789	4.46693	4.46089	4.52635	4.3972	4.11729	3.59759	4.746	3.96298	4.22803	3.46319	4.32166	4.5414	0	0	0	0	2.14883	2.76339
gp157	4.91569	4.37958	4.50564	3.27085	3.90552	4.04169	2.71649	4.47766	4.78701	3.75522	4.64355	3.93425	4.28419	3.38927	4.30723	4.40309	3.83576	5.02398	4.02865	4.08711	3.92455	4.23459	4.03464	4.53115	4.15049	4.45459	4.51216	4.42777	3.85113	3.33766	4.80633	3.9639	3.9444	3.29047	4.14422	4.34677	0	0	0	0	0	0
gp159	4.65942	4.07854	4.38999	2.72175	3.68743	3.82291	0	4.35786	4.47856	3.44012	4.38522	3.5765	4.10471	2.64422	4.06757	4.12413	3.50714	4.71657	3.95482	4.12759	3.82371	4.17772	3.50768	4.28873	3.80917	4.12528	4.17507	4.22958	3.69146	2.27343	4.45172	3.9075	3.71946	2.8111	3.64012	4.0435	0	0	0	0	0	2.16133
gp161	3.21334	3.59144	3.19968	3.92075	3.45256	3.8151	2.73877	3.34367	3.34993	3.70645	3.34819	3.5781	3.5632	3.69899	3.65331	3.46041	3.57509	3.23097	3.56934	2.92463	3.18232	3.46419	4.30037	3.31746	3.22654	3.57331	3.45962	3.4627	3.71108	3.01132	3.46399	3.39425	3.53773	3.77638	3.46915	3.80393	2.6858	0	0	0	0	2.44801
gp162	2.48405	2.93328	2.4905	3.2622	2.59667	1.47202	2.19106	2.65603	2.52739	3.05248	2.49064	2.93398	2.82902	3.06385	2.98606	2.60487	2.86614	2.43844	3.19264	2.12622	2.44933	2.61153	3.87005	2.58641	2.58126	2.81859	2.64706	2.72729	3.08925	2.56762	2.71784	3.09803	2.78625	3.08086	2.78069	3.33695	0	0	0	0	0	2.29487
gp163	2.11109	2.70353	2.10923	2.85612	2.33986	2.12523	2.83799	2.46367	2.16837	2.74018	2.33741	1.68194	2.64287	2.80697	2.72251	2.39008	2.38677	2.11468	0	2.57263	2.53984	2.43588	2.15958	2.08932	2.30815	2.5284	2.17634	2.57846	2.82317	3.01992	2.33515	2.84199	2.42155	2.75572	2.48349	2.57348	0	0	0	2.495	0	0
gp164	3.3623	3.17926	3.30892	2.88328	2.98895	3.54329	2.92251	3.47414	3.31312	3.03583	3.355	3.1597	3.23784	3.10854	3.10865	3.25812	3.09639	3.31153	3.31247	3.30691	3.25281	3.25768	3.53404	3.35249	3.34954	3.1783	3.32448	3.18675	3.21544	3.08425	3.44363	3.29454	3.15338	3.02043	3.24802	3.17938	0	0	0	0	2.29757	1.99384
gp165	3.53588	3.53377	3.6199	3.42472	3.63652	3.17099	3.62826	3.72474	3.4868	3.39829	3.78051	3.78506	3.55981	3.38948	3.4085	3.71035	3.53282	3.67651	3.37941	3.56294	3.65626	3.13353	3.87271	3.74883	3.68642	3.51646	3.50789	3.45653	3.46893	3.988	3.65058	3.57275	3.55894	3.55108	3.65624	3.63324	3.38477	3.84405	3.14329	3.79603	3.57632	4.45963
gp166	2.92785	2.87382	2.96301	2.72401	3.12258	0	3.03102	3.21552	2.67575	2.76162	3.18359	2.84695	2.98281	3.02326	2.79339	2.91306	3.00706	2.82771	2.81154	3.04605	3.05421	2.65005	2.55292	3.13298	3.12445	2.94471	2.94208	2.81046	2.72981	3.83274	3.15991	2.95997	3.00234	2.86054	3.10649	3.0353	3.16293	2.43722	3.10114	3.43352	2.95844	3.64981
gp168	3.49575	3.658	3.5293	3.67476	3.87645	3.52317	3.90004	3.71501	3.4797	3.69499	3.67772	4.09131	3.61753	3.72184	3.50396	3.57975	3.80245	3.49807	3.62539	3.90489	3.81642	3.66034	3.35794	3.70256	3.80913	3.62786	3.64455	3.54074	3.4351	3.84747	3.62038	3.86805	3.69971	3.70937	3.72329	3.71876	0	3.31764	2.84226	3.75027	3.57034	4.29471
gp169	2.49258	2.96489	2.88548	3.03597	3.38956	2.86996	3.20859	2.86196	2.47205	3.05921	2.79905	3.68194	2.86512	3.22957	2.85395	2.74414	3.19613	2.51624	3.37316	3.37461	3.16755	1.96913	3.20304	2.93391	3.05819	2.86396	2.95677	2.80096	2.9786	3.64824	2.41837	3.43135	3.15488	3.18095	3.02405	2.73916	0	2.63379	0	3.22173	3.14267	3.57202
gp170	3.63191	3.38861	3.5858	3.16405	3.22902	3.68598	3.13322	3.44577	3.43398	3.28631	3.46878	3.37975	3.29722	3.46069	3.16588	3.33065	3.37616	3.5594	3.38882	3.59803	3.47787	3.04638	3.4449	3.40325	3.2291	3.33783	3.3598	3.22683	3.08668	3.28877	3.64478	2.84799	3.38096	3.17312	3.39298	3.37172	2.98683	2.87791	2.84226	2.495	0	3.47803
gp173	3.74193	3.33198	3.81519	3.53836	3.41207	3.68598	3.56764	3.70123	3.85051	3.49482	3.90093	3.67444	3.68826	3.98795	3.51457	3.7285	3.68678	3.43467	4.25115	3.89231	4.06193	3.48694	3.74355	3.60756	3.79895	3.54168	3.85865	3.80936	3.04127	3.3475	3.47799	3.01083	3.78929	3.36178	3.86525	3.81976	5.40605	5.26632	5.01718	5.33956	5.30177	5.40724
gp174	3.2202	2.91163	3.22448	2.84635	2.84847	0	2.80942	2.94564	3.48904	2.86834	3.28275	3.30196	2.90144	2.89461	2.92031	3.16929	2.934	3.05297	3.034	3.05369	3.13659	3.21272	3.46628	3.04082	3.36419	2.94239	3.35245	3.14399	2.77979	0	3.13232	2.937	3.19538	2.89639	3.04228	3.00475	4.71401	4.61337	4.39188	4.45404	4.68443	4.73504
gp175	3.08252	3.19246	3.03942	3.39134	3.19419	3.54513	3.28325	3.08799	3.13802	3.35595	3.08238	4.24208	3.19057	3.18194	3.19762	3.18099	3.13475	3.17641	3.57518	3.18138	3.18426	3.04638	3.34546	3.09614	3.10571	2.99685	3.10093	3.16506	3.29311	3.64392	3.19025	3.44232	3.10023	3.30704	3.18842	3.1527	2.98683	3.054	0	2.89983	3.14267	2.8603
gp182	4.12144	3.85458	4.04713	3.56274	3.43816	3.2679	4.0068	4.22993	3.82293	3.71093	4.2491	2.80688	4.02768	3.77705	3.79866	3.87992	3.64667	4.14367	3.64826	3.87539	3.94612	4.06922	3.45485	4.0598	3.92141	3.9064	3.76403	3.93353	3.59725	3.90926	4.09461	3.84009	3.88065	3.69386	3.93739	4.07423	0	2.75297	2.84226	3.27315	0	3.47308
gp183	4.2237	4.25069	4.04132	4.3745	4.25258	3.86909	4.12144	4.04842	4.16419	4.22052	4.34041	3.99935	4.2804	4.17569	4.27202	4.14569	4.13885	4.4337	4.02098	3.94359	3.8932	4.05981	3.83507	4.17696	3.94356	4.30306	4.07592	4.2419	4.50121	4.00432	4.25296	3.85189	4.18338	4.50129	4.13901	4.23613	4.66188	4.68833	4.16448	4.18271	4.79453	4.99461
gp188	3.61181	3.8158	3.5843	4.06476	3.531	3.56893	3.81795	3.65579	3.66384	3.94796	3.6771	3.88828	3.92048	3.62507	3.85918	3.65311	3.58048	3.60433	3.6135	3.38529	3.38023	3.67647	3.35794	3.57452	3.63361	3.90396	3.51405	3.73584	3.97831	3.614	3.6946	2.91857	3.8275	4.0505	3.77072	3.67745	3.38477	3.70155	3.14329	3.86217	3.44432	4.5472
gp192	2.68946	2.47411	2.4684	2.289	1.94948	2.56893	0	3.04694	2.66646	2.1283	2.62878	0	2.41966	1.44282	2.4501	2.93705	2.17324	2.67088	0	2.53489	2.48181	3.18486	2.40587	2.5081	2.35864	2.1867	2.49689	2.80364	1.88051	2.87037	2.55097	0	2.17572	2.1903	2.33869	2.31963	0	0	0	0	0	0
gp193	3.94829	3.58567	3.72912	3.44247	3.50028	3.74502	3.98181	4.05144	3.82292	3.54063	3.88835	3.57192	3.5747	4.09146	3.60576	3.9237	3.68268	3.65611	3.43813	3.83749	3.80262	4.22873	4.00041	3.83442	3.69294	3.49063	3.81939	3.70782	3.43004	3.89017	3.90392	4.01141	3.59075	3.55849	3.71458	3.64848	0	2.87791	0	2.495	0	2.21055
gp198	3.56369	3.3962	3.59928	3.42679	3.66544	3.99064	3.48618	3.75514	3.6389	3.49814	3.60962	4.24137	3.46681	3.63227	3.51535	3.85246	3.70557	3.68605	3.85224	3.5798	3.42456	3.67291	3.53404	3.56984	3.72714	3.42897	3.66813	3.49985	3.22244	3.54752	3.7213	3.27108	3.38077	3.35754	3.48704	3.48726	4.53177	4.72018	4.3159	4.64817	4.51684	5.00618
gp200	3.92905	4.04353	3.84115	4.16944	3.73549	4.10041	4.08394	3.91695	3.60326	4.17326	4.01899	4.1804	3.92832	4.09692	4.01195	3.86847	3.78851	4.05978	3.9934	3.71737	3.72417	3.78762	3.05691	3.88734	3.76764	4.12891	3.73581	4.02112	4.14001	3.64277	4.02545	3.79796	3.92301	4.06951	3.944	4.03193	4.6845	4.88382	4.45159	4.56511	4.78602	4.89773
gp202	3.10399	3.00254	3.01948	3.07764	3.56788	3.02732	3.49743	3.09637	2.98942	3.32451	3.03539	4.28136	2.96878	3.16227	3.08056	3.14969	3.43515	2.997	3.37442	3.47158	3.03376	3.42646	4.02306	3.05332	3.12077	3.05947	3.17581	3.08261	2.73029	3.57514	3.04834	3.00848	3.0942	3.16377	3.11985	3.02072	3.58233	3.80669	3.59928	3.572	4.06137	3.65178
gp206	3.4084	3.53985	3.40709	3.60808	3.65321	3.65766	3.63419	3.66559	3.46326	3.6805	3.55882	4.3594	3.58902	3.69307	3.55795	3.56513	3.57584	3.42317	3.6135	3.7176	3.66151	3.93371	3.65897	3.70888	3.70812	3.55238	3.50476	3.46345	3.45235	3.78238	3.5334	3.3957	3.50675	3.64888	3.67014	3.79225	3.7551	3.91224	3.17369	3.78414	3.93546	4.12389
gp210	4.0523	4.00768	4.3156	3.9763	3.92895	4.13908	2.77619	4.20498	4.49244	4.04046	4.4735	4.03864	4.13785	3.17762	4.3689	4.09549	3.67808	4.0056	5.24125	4.02287	4.2286	4.07435	3.45485	4.55957	4.54659	4.09061	4.04111	4.05529	3.67278	2.64335	4.0135	4.18832	4.54648	3.45637	4.10748	4.12018	5.13329	5.14509	4.94743	5.60883	5.35641	6.08146
gp211	4.64949	4.5625	4.7688	4.35114	4.09159	4.48598	3.7485	4.69516	5.07518	4.39929	5.02855	4.55548	4.58843	3.94851	4.89947	4.45708	4.14121	4.4898	5.67211	4.42894	4.69759	4.66364	3.54499	5.14066	5.0241	4.65854	4.66107	4.53518	4.21115	3.69023	4.56406	4.48672	5.08937	3.97766	4.70687	4.25326	6.02289	5.98426	5.75176	6.41789	6.20502	6.72496
gp212	3.06976	3.25078	3.25347	3.24948	3.55796	3.63909	3.39868	3.32707	3.32922	3.3391	3.18146	4.12211	3.11624	3.28641	3.15479	3.17374	3.0416	3.23276	3.57201	3.3169	3.36579	3.5155	3.75588	3.27802	3.263	3.11949	3.22563	3.16047	3.06771	3.48844	3.05773	3.05529	3.22046	3.35185	3.2682	3.15983	4.65717	4.58165	4.34455	4.53738	4.57756	4.99569
gp214	3.22443	3.27744	2.9983	3.06284	3.04947	0	3.08512	3.2589	3.26126	3.11447	3.24389	2.97321	3.19916	3.28579	3.23577	3.34558	3.06049	3.46881	3.04664	2.74456	3.00811	3.22653	3.20511	3.33351	3.09335	3.17716	3.35656	3.23856	3.18511	2.59759	3.42586	3.30358	2.91758	3.17422	3.10937	2.92592	3.13912	2.99018	2.84226	2.92636	2.55042	3.38664
gp215	4.23588	4.3467	4.3775	4.44495	4.32267	4.494	4.23987	4.48633	4.20522	4.46034	4.37142	3.91216	4.44925	4.36091	4.39385	4.46031	4.39002	4.1067	4.2825	4.38451	4.32652	4.47485	4.15382	4.31283	4.42276	4.34111	4.3151	4.31041	4.56288	4.37979	4.31986	4.312	4.32863	4.51644	4.34809	4.50674	3.38477	3.27585	0	3.67109	3.24156	4.31543
gp216	4.74124	4.46562	4.76932	3.97039	4.41843	4.54504	4.22292	4.97859	4.75932	4.39115	4.69214	4.76854	4.61777	4.25937	4.57078	4.73089	4.36149	4.63882	4.37751	4.54517	4.62651	4.95243	4.46937	4.75321	4.8115	4.44377	4.74384	4.51119	4.34962	3.98577	4.8493	4.46639	4.33029	4.11681	4.55267	4.65529	5.05641	5.02805	4.83592	5.33767	5.22882	5.67424
gp217	3.74867	3.48533	3.81967	2.93535	3.58355	3.78991	3.02282	3.98685	3.77009	3.3464	3.76145	3.86448	3.61928	2.76208	3.60042	3.81613	3.3026	3.83324	3.41436	3.57607	3.5431	4.00294	3.56432	3.74272	3.69494	3.44884	3.77436	3.56003	3.14414	2.94438	3.96868	3.53065	3.3356	2.85052	3.51718	3.70143	4.01091	4.29309	3.87569	4.3284	4.44183	4.69637
gp218	3.33087	3.55909	3.5745	3.67716	4.12021	4.53117	4.04797	3.52024	3.61636	3.85272	3.52363	4.16277	3.54309	3.68319	3.42641	3.94691	4.34539	3.47374	3.85653	3.8913	3.47059	3.43456	4.63521	3.48705	3.62398	3.55788	3.88773	3.57651	3.40848	3.72397	3.46897	3.63873	3.47149	3.65391	3.52308	3.33695	0	3.3817	0	2.79603	2.29757	2.16133
gp219	3.6553	3.8741	3.64816	3.94453	3.53948	3.22726	4.16201	3.81553	3.67514	3.8942	3.55579	4.01764	3.74937	4.00837	3.68277	3.58029	3.67044	3.73854	3.83171	4.01537	3.92559	3.61675	3.53404	3.74439	3.77462	3.95709	3.33864	3.76501	3.87239	4.24562	3.57752	4.04633	3.8693	4.08182	3.87862	3.84505	4.26018	3.83933	3.75502	4.49369	4.13167	4.64515
gp220	2.56522	2.85376	2.67535	2.83472	2.14458	0	2.91966	2.83428	2.72718	2.92887	2.38564	1.82112	2.65127	3.08458	2.64273	2.42748	2.85908	2.47778	3.36168	3.0296	3.06827	2.89102	0	2.7741	2.71975	2.86066	1.87421	2.68887	2.91573	2.86693	2.40843	2.94456	2.92939	3.09159	2.7424	3.20783	2.6858	0	0	3.17805	0	3.22654
gp221	3.17859	3.84532	3.35808	3.98877	2.94617	3.34708	3.78147	3.46295	3.14121	3.78554	3.11154	2.40164	3.86523	3.8925	3.86886	3.26586	3.54191	3.18001	3.41053	3.53741	3.65886	3.46061	0	3.27789	3.40307	4.00166	2.51107	3.79909	4.27448	3.62952	2.83129	3.98806	3.93196	4.2152	3.86222	3.91113	2.6858	2.57688	0	3.60861	0	3.79308
gp225	3.46903	3.64313	3.72092	3.61705	3.57575	3.97388	4.43681	3.89837	3.33736	3.74824	3.61177	3.24674	3.67513	4.26938	3.48504	3.51389	3.91291	3.4557	3.92407	4.06956	3.97565	3.79795	4.01548	3.6236	3.74042	3.69403	3.44887	3.59892	3.92221	4.40261	3.70323	4.28241	3.87786	3.98565	3.89603	3.7053	2.98683	0	0	3.79603	2.89963	3.55103
gp226	3.11791	3.33831	3.31358	3.37314	3.34277	3.44011	3.88655	3.55479	3.07532	3.49712	3.2348	0	3.36504	3.69529	3.19334	3.06987	3.46726	2.87072	3.37941	3.63536	3.61238	3.53116	3.32643	3.17413	3.37416	3.29093	3.13284	3.16873	3.45767	3.36926	3.12842	3.48442	3.50712	3.63484	3.45532	3.32111	0	2.92226	0	3.39809	0	3.59438
gp229	3.65755	3.90137	3.76566	4.01865	3.86858	3.66514	4.22595	3.88215	3.79156	3.99159	3.87316	3.65197	4.00151	4.07226	3.88	3.59643	3.79299	3.69205	3.87157	3.95519	3.88686	3.81822	3.90428	3.82878	3.79939	4.00824	3.71458	3.85574	4.14371	4.07471	3.81412	3.91406	3.98106	4.06607	3.90628	3.68015	3.79975	3.96614	3.77168	4.65508	3.7945	4.61417
gp230	3.46393	3.71099	3.78957	3.91647	3.9145	3.75324	4.57904	3.81698	3.41364	3.96248	3.72515	3.84231	3.77425	4.42344	3.50623	3.35865	4.04367	3.21782	4.09629	4.1763	4.09406	3.82981	3.94938	3.61157	3.91344	3.78299	3.49074	3.4993	3.73391	4.36729	3.71001	4.21289	4.00956	4.08041	3.89159	3.98506	4.55097	4.53823	4.2965	5.14248	4.60262	5.10655
gp232	4.5447	4.01003	3.82854	2.98666	2.83624	0	3.28859	3.82534	4.52159	3.21877	4.3273	0	3.85768	3.31929	3.86217	3.73905	3.11878	4.60169	3.86608	3.67669	3.54397	3.65538	2.77292	4.06345	3.58854	4.02969	4.09629	4.25986	3.3346	3.03896	4.35575	3.57499	3.62424	3.05343	3.55386	3.68742	0	2.35503	0	0	0	0
gp233	4.49864	4.0616	3.78738	2.63311	2.65241	2.86851	0	3.96466	4.44948	3.26196	4.27074	2.32539	3.94119	2.57954	3.92165	4.06539	2.62121	4.68639	3.77152	3.73919	3.45242	3.78634	2.88729	4.20886	3.6895	4.09374	4.06833	4.14282	3.30167	3.2972	4.65292	3.60446	3.44985	2.77238	3.79235	3.71475	0	0	0	0	0	0
gp235	4.56823	4.13699	3.80077	3.02084	3.12449	2.86996	3.25596	3.88806	4.41907	3.49486	4.29192	3.24621	3.73706	3.25382	3.92742	3.79961	3.18636	4.69931	3.64826	3.85965	3.40111	3.90121	0	4.26636	3.53589	4.1291	4.02525	4.21175	3.20032	3.30861	4.62887	3.663	3.55957	3.2994	3.75529	3.83601	0	0	0	0	0	0
gp236	3.3931	3.44705	3.60664	3.60379	3.8331	3.17099	4.29046	3.75873	3.27558	3.72098	3.5179	3.931	3.47592	4.00978	3.33772	3.28021	3.73976	3.33516	3.13637	3.88644	3.66251	3.83742	3.25189	3.48114	3.50584	3.4745	3.29523	3.45332	3.5033	4.05023	3.53644	4.02928	3.61458	3.65839	3.66905	3.72281	2.62532	0	0	0	3.11248	2.7948
gp237	3.89695	3.86328	3.86763	3.87464	4.07367	3.77305	4.52338	3.99973	3.89421	4.02067	3.87824	4.45094	3.73782	4.24074	3.68618	3.72314	4.0761	3.9001	3.89604	4.15597	3.98958	4.01666	4.45485	3.87766	3.93611	3.80374	3.7379	3.82784	3.74603	4.33871	3.96901	4.12836	3.8788	3.98118	3.90821	3.69466	3.4206	3.58548	0	3.09706	3.77018	3.22203

## Sheet: Avg. read depth in windows
Supplemental File S9. Average read-depth per base in consecutive 1 kb genomic windows from 42 sequence data accessions positive for Apis mellifera filamentous virus (AmFV). Values are derived from mapping reads to reference accession NC_027925.1. Columns colored yellow are whole-body tissue samples from BioProject PRJNA706851 and columns colored green are brain tissue samples from BioProject PRJN…
Genomic window start coordinate	SRR13871577	SRR13871578	SRR13871579	SRR13871581	SRR13871611	SRR13871645	SRR13871647	SRR13871650	SRR13871651	SRR13871652	SRR13871655	SRR13871671	SRR13871673	SRR13871674	SRR13871676	SRR13871678	SRR13871679	SRR13871680	SRR13871681	SRR13871685	SRR13871687	SRR13871688	SRR13871690	SRR13871694	SRR13871706	SRR13871707	SRR13871708	SRR13871709	SRR13871710	SRR13871711	SRR13871718	SRR13871721	SRR13871724	SRR13871725	SRR13871727	SRR13871729	SRR14887965	SRR14887970	SRR14887971	SRR14887973	SRR14887977	SRR14887996
1	25.189	956.629	137.006	211.818	125.483	1.5	13.595	223.717	17.477	174.786	100.61	1.35	66.266	42.584	137.066	50.624	57.933	15.291	2.349	29.048	43.392	4.771	1.392	21.457	13.548	236.582	50.581	441.624	37.557	4.635	11.126	11.129	137.423	436.258	244.809	4.205	0.338	2.329	0	0.2	1.5	3.611
1001	10.77	386.535	68.52	90.899	50.129	0	6.593	131.471	11.412	107.267	51.444	0	21.701	17.208	48.477	27.732	22.101	10.958	1.227	13.73	14.742	1.938	0.858	8.397	5.286	71.628	28.26	164.865	12.474	1.103	4.73	5.954	54.513	140.852	89.772	1.937	0.162	0.671	0	0	0.5	1.089
2001	2.113	76.543	37.258	5.491	7.129	0	1.609	19.981	10.57	8.878	10.895	0.093	5.727	2.69	9.011	5.222	6.32	2.387	0.024	3.446	3.225	0.036	0	3.595	0.708	10.133	15.268	19.483	1.648	0.329	0.337	0.173	2.383	8.575	12.455	0.158	0	1.1	0	0.3	0.286	0.361
3001	26.092	584.733	65.126	109.438	65.944	0	1.153	65.971	50.393	93.957	85.291	1.873	43.475	4.765	139.041	39.806	26.982	37.511	0	10.061	6.957	1.218	0	16.863	5.365	129.448	88.028	435.874	18.57	0.869	9.961	1.19	29.537	133.04	64.593	1.05	0	0.2	0	0	0.618	0.539
4001	15.288	189.35	27.713	22.241	27.666	0.3	0	27.842	33.091	24.306	40.795	0.284	13.97	2.176	32.806	22.986	5.987	23.781	0.45	3.691	1.681	0.732	0.15	8.577	2.675	40.063	41.204	123.686	3.513	0.861	5.784	0.3	18.106	43.442	24.098	0	0	0.1	0.1	0	0.296	0.5
5001	2921.62	3905.06	3425.57	848.762	1589.96	22.204	2.694	3308.52	3103.61	1738.64	3605.14	6.252	2072.51	28.09	3044.56	1701.72	139.406	3455.67	14.728	512.158	486.713	204.777	0.6	1569.61	525.442	3325.08	1556.29	3810.73	234.283	0.232	942	20.746	1852.31	776.529	2800.35	506.551	0	0	0	0	0	0.5
6001	2807.55	4872.21	3088.11	242.542	300.583	6.884	1.506	2178.36	3685.11	351.197	3035.8	2.592	916.889	9.7	1254.02	1438.78	50.767	2829.37	4.019	107.867	97.897	53.634	3.441	658.908	97.513	3503.99	671.785	3498.58	67.342	0.668	194.483	7.748	824.573	367.301	755.035	114.7	0	0	0	0	0	0.3
7001	1954.72	3988.5	1638.51	690.864	577.173	23.4	6.026	1574.48	2257.48	689.477	2223.8	16.397	1305.37	50.437	1660.58	1391.14	128.028	2763.41	59.477	104.682	96.579	118.853	3.924	1483.77	530.51	2162.92	1562.74	3009.9	88.459	3.3	1435.97	192.75	1353.85	388.437	1410.71	147.602	0	0	0	0	0	0.213
8001	98.006	546.993	60.651	44.108	35.676	0.3	2.218	100.885	189.581	44.001	86.609	0.253	15.521	13.13	57.148	28.799	8.602	93.288	0.218	9.004	6.908	0.847	0.573	38.813	3.339	112.128	53.801	247.608	6.471	0.75	11.652	2.25	28.49	53.4	51.875	0.898	0	0	0	0	0	0.987
9001	6.004	218.565	52.725	10.216	30.641	0.3	4.654	66.825	10.872	10.053	29.352	0	14.388	17.577	35.014	5.631	7.567	4.08	2.55	4.05	9.936	0.75	0.9	3.338	5.1	24.419	0	114.2	5.548	1.2	3.164	2.547	31.107	89.968	38.264	0	0.4	0.4	0	0.4	0.4	4
10001	16.87	294.563	52.516	22.286	36.339	0	1.952	62.169	25.169	30.96	61.224	1.164	21.396	7.183	36.515	18.675	11.884	17.342	1.05	5.535	7.76	0.9	0.845	17.312	4.566	52.579	20.356	164.426	4.607	1.763	7.736	0.3	28.67	93.245	31.749	0.385	0.8	1.048	0.4	2	0.4	21.871
11001	16.516	351.376	78.001	81.065	49.405	0.75	2.308	92.696	24.709	61.684	58.617	1.136	16.173	11.378	39.107	14.219	13.077	18.434	0.3	14.012	12.132	2.796	1.021	17.041	4.075	74.516	26.363	170.74	9.211	2.137	5.164	3.946	40.248	126.541	56.039	0.815	0.9	1.522	0	2.732	0.718	27.529
12001	6.107	279.928	56.701	73.127	47.255	0	1.587	81.859	13.547	48.708	26.47	1.186	13.8	12.358	32.87	8.681	10.946	9.806	0.424	7.464	16.909	2.863	1.079	13.926	5.309	73.004	25.191	134.971	3.727	1.5	2.057	4.418	41.383	126.494	78.439	1.05	0.398	0.23	0.2	1.755	0.282	11.602
13001	9.833	379.101	79.828	66.495	44.57	0.15	1.603	66.394	15.922	29.645	31.421	1.37	11.468	8.831	47.175	10.518	11.845	10.484	0.026	17.993	15.688	1.316	0.205	12.536	6.008	78.738	18.405	93.601	14.316	1.513	3.844	4.086	60.608	207.783	75.302	0.45	0.402	0.5	0.2	1.846	0.567	14.594
14001	12.241	284.9	36.806	41.131	34.389	0.192	1.552	67.671	17.466	40.678	36.717	1.144	11.619	4.135	38.951	10.183	8.418	10.386	0.075	17.788	8.83	1.516	0.258	14.135	3.79	53.797	53.103	119.801	2.958	1.691	0.515	1.391	35.554	117.648	42.36	1.964	0.158	0.011	0	0.646	0.133	10.471
15001	10.118	177.812	37.298	22.638	19.921	0.108	0.744	53.413	17.232	33.322	22.691	0.3	7.292	7.115	23.297	6.723	10.648	5.828	0.225	11.155	3.889	1.559	0.342	10.092	2.352	34.377	36.265	81.484	7.029	0.395	2.582	3.859	31.821	113.143	53.869	1.636	0.542	1.789	0.1	1.921	0.2	24.329
16001	13.203	292.33	83.528	38.415	41.845	0.676	3.048	131.798	22.056	60.225	49.954	1.35	16.72	14.422	44.98	12.648	14.782	7.493	0.341	12.736	11.332	1.851	1.05	13.323	3.099	74.053	36.514	123.314	9.255	1.624	4.642	3.914	34.75	103.371	58.366	1.078	0	1.451	0	4.294	0.306	16.312
17001	5.084	232.126	53.8	56.729	39.211	0.634	4.291	80.38	8.235	49.684	36.47	0.15	13.03	15.291	25.777	11.303	11.463	4.936	1.216	11.112	8.852	1.44	0.6	4.817	4.487	50.654	10	82.215	5.935	1.643	4.014	3.369	26.451	88.438	51.893	1.766	0	0.849	0.4	2.531	0.194	2.913
18001	31.984	347.408	101.155	41.992	40.269	0.04	2.261	183.654	67.709	48.372	81.089	2.017	28.951	5.437	45.495	35.696	9.919	25.707	0.242	7.075	7.667	1.894	1.744	25.919	9.428	79.398	110.588	284.212	4.684	0.182	8.812	3.478	22.657	96.299	56.896	0.92	0.3	0.2	0.2	0.174	0.4	2.285
19001	31.67	559.079	176.516	103.245	92.014	1.174	8.621	238.367	60.862	103.985	127.039	0.529	36.061	21.825	87.435	34.213	26.575	17.094	1.472	17.509	21.088	4.041	1.406	28.348	9.48	111.094	61.129	297.101	16.055	1.65	10.614	5.975	62.413	170.815	117.179	2.485	0	0.4	0	0.4	0.4	2.289
20001	30.129	732.113	181.987	138.706	100.005	0.926	5.872	214.727	48.821	108.189	122.299	0.764	47.653	27.887	114.166	36.73	33	20.835	1.378	26.464	32.816	4.247	0.3	30.874	9.224	138.336	57.008	331.078	23.574	2.301	11.187	8.607	95.319	253.472	129.498	2.384	0	0	0	0	0	0.9
21001	32.432	484.764	119.781	70.278	60.794	1.392	4.696	197.64	52.666	64.705	113.408	1.394	45.867	14.565	79.149	27.946	17.221	15.314	0.704	12.988	17.042	3.319	0.55	27.824	11.342	106.077	58.993	259.851	7.536	0.929	7.078	2.53	51.137	144.368	85.054	2.511	0	0	0	0.4	0.2	1.032
22001	30.384	382.592	114.176	41.476	54.463	2.208	2.224	193.022	65.242	47.988	107.024	1.662	36.819	4.875	63.352	49.628	16.744	20.338	0.496	4.838	10.968	3.105	0.05	31.022	11.857	84.666	55.263	297.043	6.457	0.37	5.874	0.47	29.107	93.276	61.269	1.366	0	0	0	0.2	0	0.568
23001	40.215	1203.48	150.793	189.663	51.191	0.6	2.146	193.655	108.775	122.191	141.517	2.634	60.648	9.337	222.719	67.355	10.163	46.75	0.26	11.59	17.562	4.014	0.3	36.378	10.053	231.608	90.691	771.048	38.486	2.076	12.714	2.4	95.26	311.839	151.86	3.48	0.2	0	0	0.1	0	0.204
24001	58.76	701.348	182.644	58.604	61.977	1.05	6.739	270.275	127.045	69.457	149.171	0.619	47.978	17.01	110.893	101.581	21.795	60.089	1.063	22.951	21.877	5.807	1.5	46.966	13.176	151.704	138.01	569.291	23.042	1.674	20.316	3	62.181	141.759	158.931	2.848	0	0	0	0	0	0.196
25001	28.711	555.092	109.548	81.136	55.387	1.704	1.908	141.061	55.481	54.535	82.32	0.281	39.072	12.928	105.608	39.164	20.009	27.144	0.777	11.264	16.987	2.453	1.05	19.586	12.875	104.961	50.516	318.56	14.706	1.95	8.927	2.512	49.623	170.346	101.105	3.056	0	0	0	0	0	0
26001	22.447	658.56	87.756	134.498	45.126	1.448	1.477	92.753	37.67	88.723	69.078	0.3	48.268	12.353	153.831	39.879	18.698	19.335	0.857	11.959	13.315	1.099	0.554	15.483	6.793	135.26	29.451	535.755	28.479	0.362	7.786	3.094	59.955	235.14	111.633	0.158	0	0	0	0	0	0
27001	12.254	466.408	114.831	96.926	37.833	1.312	8.653	134.365	20.832	93.653	62.35	0	26.935	19.326	51.543	20.39	17.952	7.689	1.649	23.668	20.604	2.145	0.496	10.039	7.231	108.246	18.98	215.426	18.001	1.926	6.411	4.513	74.055	180.149	109.674	5.286	0	0	0	0	0	0
28001	17.995	653.062	91.079	101.122	42.799	0.925	2.073	100.611	46.758	88.8	101.062	0.834	41.104	9.311	117.846	28.213	20.412	23.726	0.794	18.089	13.069	0.574	0.9	16.119	5.85	123.566	44.888	423.418	16.368	2.232	7.052	3.768	54.406	192.234	87.446	2.056	0	0	0	0.1	0	0.1
29001	37.208	455.585	109.833	56.723	48.264	0.611	0.752	114.055	72.402	42.754	91.629	1.566	28.376	5.296	69.851	38.691	16.62	30.008	1.5	9.863	12.488	3.9	0.739	22.576	5.18	72.662	57.855	274.408	10.038	1.516	7.372	2.171	28.568	112.282	69.325	0.9	0	0	0	0	0	0.5
30001	14.463	514.229	132.748	560.95	2120.42	5.785	2.48	70.008	1386.38	57.83	71.218	40.156	20.507	8.501	150.609	1764.38	39.38	214.287	1.189	15.366	14.117	4.799	1.216	33.12	20.333	87.762	996.359	545.341	6.99	1.163	10.099	2.782	31.188	115.593	80.052	1.529	0	0.3	0.2	0.037	0	0.6
31001	94.315	1458.44	202.567	103.614	40.451	2.902	3.741	324.4	344.635	89.965	307.701	3.005	66.829	18.025	229.33	120.212	20.864	198.715	0.599	22.089	21.407	13.26	1.391	88.291	8.965	183.291	203.062	993.223	14.191	2.816	29.204	7.781	105.209	152.476	227.301	3.134	0	0.9	0	0.162	1.1	0.7
32001	9.567	215.557	42.711	70.376	23.351	0.163	3.389	56.804	8.816	46.053	32.556	0.733	11.625	10.518	28.219	10.061	10.88	8.914	0.304	6.82	6.581	0.989	0.252	8.412	2.515	57.413	2.016	113.204	5.382	2.779	3.57	1.894	28.459	84.042	56.419	1.487	0	0	0.2	0.6	0.2	0
33001	12.464	328.232	60.624	60.9	27.075	0.874	2.527	59.828	7.587	32.118	39.094	0.162	15.743	6.469	33.749	13.605	7.079	9.67	0.603	14.889	10.6	1.35	0.45	8.659	3.775	60.508	4.053	198.447	9.254	1.155	2.743	2.233	42.063	193.448	79.232	1.8	0	0	0	0	0.4	0
34001	8.496	174.559	31.289	24.268	15.989	0.45	1.156	36.577	16.453	20.881	23.473	0.7	7.664	3.042	21.075	12.034	5.151	7.223	0.368	3.652	5.656	2.619	0.086	8.258	2.618	28.237	3.702	107.092	2.941	0.592	1.302	0.51	15.974	51.24	36.497	0.3	0	0	0	0	0	0.1
35001	5.904	126.341	18.661	18.782	8.005	0.15	0.644	21.171	7.097	15.569	15.827	0.8	5.986	2.508	13.573	7.766	1.899	5.827	0.232	3.548	2.594	1.581	0.364	4.942	2.632	21.413	5.748	68.257	2.759	0.608	1.398	0.09	9.676	36.96	18.703	0	0.1	0	0	0	0	0.3
36001	3.52	64.006	11.8	21.1	8.649	0	1.174	15.195	4.672	13.661	7.288	0.3	3.345	0.303	7.891	1.615	2.292	3.067	0.32	4.375	1.827	0.907	0.123	1.832	2.14	14.057	2.17	46.401	1.975	0.357	1.664	0.9	8.223	24.368	12.488	0.15	0.1	0.1	0	0.17	0	0.2
37001	15.98	255.494	45.5	23.45	22.101	0.45	0.326	28.905	39.428	23.539	40.862	0.3	14.205	2.247	39.659	35.585	7.158	38.333	0.73	3.725	4.173	2.093	0.477	11.368	2.81	37.843	63.68	169.297	3.575	0.393	6.136	0.15	15.327	50.932	31.462	0.6	0	0	0	0.33	0	0.2
38001	8.55	108.75	38.097	15.75	17.399	0.15	0.6	65.545	11.55	19.65	46.348	0	6.45	2.1	34.047	10.649	2.4	5.25	0	3.9	5.548	2.1	0	6.15	1.65	28.05	15.45	99.3	4.35	0.75	2.4	0.6	11.85	34.199	33.147	0.15	0	0.4	0	0	0	0.2
39001	50.468	495.31	198.92	56.905	67.833	0.607	2.25	306.488	115.355	72.159	325.469	0.638	39.001	4.41	131.098	63.989	9.782	42.731	0.529	7.135	12.868	6.097	0.9	30.913	11.873	112.618	81.305	471.613	10.377	0.3	12.12	1.143	28.074	90.187	113.32	2.135	0	0.3	0	0.2	0.2	0.283
40001	28.608	335.732	152.81	51.675	52.804	0.143	1.994	238.637	79.622	65.969	198.861	0.202	26.307	10.704	88.68	27.352	18.147	21.13	0.521	12.17	16.114	5.504	0	28.082	6.528	72.032	61.368	267.738	11.384	1.95	5.88	2.757	32.376	151.501	95.274	1.634	0	0.2	0	0	0	0.117
41001	50.382	393.626	190.033	48.826	78.356	1.2	1.304	189.768	97.006	65.202	157.244	3.36	25.305	10.085	85.218	57.45	12.28	39.191	0.3	20.433	17.663	4.623	1.05	25.599	9.762	88.503	58.473	389.22	11.383	1.362	13.211	2.099	44.998	144.554	140.491	3.435	0	0	0	0.2	0.5	0.4
42001	15.646	462.922	110.384	85.679	49.642	1.291	4.808	165.225	34.304	89.821	78.033	0.3	26.834	16.032	67.512	28.386	15.532	15.198	0.45	10.083	12.037	2.375	0.676	13.53	9.001	97.394	22.668	196.426	8.062	1.724	5.94	3.25	43.022	128.181	87.687	2.661	0	0	0	0.2	0.404	0.103
43001	54.222	703.985	270.756	146.246	126.02	1.709	2.971	372.122	71.359	127.296	258.634	2.1	70.003	14.176	184.664	102.37	24.865	31.616	0.9	20.721	20.026	4.742	0.824	38.81	16.743	193.08	48.586	692.821	24.21	2.46	18.889	4.307	73.544	182.384	222.589	3.355	0	0	0	0	0.496	1.283
44001	31.843	584.006	179.989	153.359	78.219	0.375	4.477	210.04	43.291	96.195	143.902	0	33.588	15.265	95.746	48.168	20.756	24.921	1.219	16.54	28.323	3.659	2.077	26.246	7.864	107.493	33.769	327.526	13.327	1.669	13.034	3.353	61.504	177.1	123.686	1.93	0	0.2	0	0	0.6	0.314
45001	58.96	578.869	254.14	63.418	51.331	0.38	4.241	290.613	91.18	71.405	186.5	0.6	53.31	17.903	86.765	48.062	19.042	30.721	1.185	13.943	17.673	5.244	0.858	27.985	8.248	123.965	45.181	552.954	11.349	3.758	23.414	4.178	61.585	149.444	190.875	1.499	0	0.034	0	0	0	0
46001	122.948	1455.42	266.596	345.059	44.255	0.295	2.999	268.226	192.846	186.473	281.47	1.067	111.084	10.218	336.645	109.079	14.764	222.269	1.646	10.502	21.04	7.414	0.215	44.865	13.049	301.4	104.159	1391.7	64.741	1.623	29.57	2.968	136.438	585.682	203.01	2.536	0	0.166	0	0	0.1	0.2
47001	63.924	518.099	90.582	44.556	35.105	0	1.433	97.46	135.737	42.285	107.484	1.182	23.424	4.897	70.908	57.541	5.322	92.993	0	9.501	5.861	0.835	0	19.439	5.429	84.202	47.628	362.506	8.134	0.6	8.115	0.952	34.775	110.994	51.802	2.25	0	0	0	0.2	0	0
48001	74.035	769.445	212.902	70.954	16.816	0.6	3.037	80.101	101.867	55.09	166.994	0.3	49.049	5.778	133.971	42.905	9.239	153.154	0.15	6.926	4.822	0.924	0	26.072	6.852	130.012	35.993	643.928	15.848	0.3	12.487	0.633	37.381	294.149	71.899	0.9	0.107	0.077	0	0	0	0.4
49001	214.196	1215.35	249.262	91.231	54.954	0.016	1.8	180.705	335.419	79.842	622.008	1.2	66.86	6.916	244.422	166.622	10.728	448.139	0.988	15.171	10.406	5.676	0.3	82.908	13.052	245.176	170.269	1126.18	13.82	1.05	51.579	1.427	55.52	107.451	107.042	3.205	0.093	0.223	0	0.253	0	0.97
50001	90.178	554.82	85.151	25.605	24.091	0.584	1.414	74.662	148.331	31.569	176.308	0.565	20.23	0.921	62.144	53.4	5.901	176.591	0.529	6.211	5.325	0.9	0	43.307	5.074	76.655	67.982	470.855	3.038	0.426	13.424	0.776	13	41.255	30.651	0.709	0.137	0.616	0	0.147	0.112	1.413
51001	124.366	855.005	282.272	96.33	305.308	5.173	2.199	260.565	308.561	89.983	380.036	15.177	48.203	5.878	190.145	313.792	36.543	195.864	1.33	26.44	15.529	7.991	3.644	56.823	16.578	134.749	292.74	957.21	16.697	0.474	28.211	2.934	55.449	129.051	140.771	4.006	2.116	7.12	0.497	0.2	1.588	25.973
52001	61.735	491.779	194.009	78.431	163.859	4.409	2.572	173.203	117.641	84.898	202.466	2.333	43.712	11.526	129.722	130.425	33.804	65.552	1.209	14.057	16.363	2.907	1.327	29.685	11.903	94.247	136.978	411.478	10.997	2.357	13.52	1.857	48.803	122.95	101.111	0.918	0.697	1.796	0	0.2	0.742	17.225
53001	54.303	570.257	184.686	110.427	99.294	2.958	11.422	282.449	99.47	99.698	170.225	2.625	46.389	27.684	114.945	86.292	34.996	39.911	1.965	20.664	30.474	3.431	2.769	33.842	13.838	118.835	145.396	541.101	19.539	2.643	16.098	7.091	89.376	199.379	174.354	2.1	0.505	3.547	0.2	0.8	1.158	17.99
54001	75.688	536.256	239.683	74.078	361.57	3.019	0.687	293.367	176.74	78.438	281.468	6.629	44.512	5.248	158.235	235.545	35.615	112.627	1.326	14.425	17.986	5.754	2.137	46.964	16.067	83.045	244.687	736.63	11.283	1.618	15.753	0.9	36.171	88.675	112.649	1.35	1.042	2.712	0.5	0.9	0.3	16.981
55001	43.307	465.843	152.943	72.658	146.193	1.973	3.057	174.572	85.375	75.587	189.551	1.813	28.75	20.152	125.494	105.162	23.891	40.006	1.05	11.927	17.536	3.628	0.602	25.611	11.109	79.717	108.984	432.495	9.843	0.949	12.695	3.45	56.162	139.816	87.603	1.366	0.7	3.623	0	0.5	0.923	16.502
56001	32.991	547.384	89.805	86.195	100.147	0.938	1.443	95.449	75.841	55.068	91.52	1.681	25.654	9.331	61.663	68.039	17.048	29.899	0	18.721	22.842	2.35	0.577	18.116	9.299	86.211	65.655	308.207	10.153	2.444	9.221	4.144	45.822	149.624	82.915	1.184	0.2	0.683	0	0	0.277	5.235
57001	30.624	959.19	98.498	193.353	110.465	0.562	0.6	106.552	79.916	100.701	111.285	0	54.254	5.34	173.221	80.229	14.985	44.917	0	8.614	12.353	1.364	0.171	18.873	4.997	120.908	50.377	586.215	34.652	2.323	7.484	0.356	60.261	250.874	102.734	1.966	0	0.394	0	0	0.2	0.6
58001	7.524	291.081	93.11	57.411	29.706	0.15	2.202	73.632	17.489	43.395	32.511	0.3	18.099	14.431	36.844	17.017	12.673	11.188	1.95	9.778	9.305	1.038	0	8.924	2.606	67.075	6.066	124.299	10.533	1.916	1.809	2.636	38.574	95.442	44.252	3.134	0	0	0	0.2	0.2	0.3
59001	24.619	402.015	65.42	67.512	28.829	0.15	1.398	58.329	65.892	47.209	63.393	1.319	24.57	3.823	70.882	31.57	11.191	36.822	0	8.156	7.941	1.285	0	12.544	3.052	56.686	43.407	333.111	11.087	0.656	7.694	2.314	19.909	111.032	70.18	0.491	0.1	0.686	0.2	0.563	0.2	2.013
60001	38.561	265.885	49.116	12.3	17.9	0.45	0.76	87.014	46.053	19.048	73.346	0.631	11.733	3.759	66.149	45.654	7.079	56.912	0.15	5.97	3.688	1.993	0	19.955	2.951	66.284	21.987	274.691	1.862	0.844	12.933	1.596	12.894	44.968	26.316	0.559	0	0.614	0	0.137	0.4	1.587
61001	27.376	612.922	56.05	116.432	32.198	0.3	2.755	93.455	36.957	53.923	90.423	0.3	34.512	6.862	146.184	55.286	10.5	53.675	0.15	9.102	11.053	1.082	0.449	26.78	1.435	105.602	24.168	496.976	37.419	0.75	5.585	1.254	37.141	164.772	72.424	0.3	0	0	0	0.082	0	0
62001	21.22	417.907	54.421	51.87	28.864	0.706	3.067	72.545	39.119	39.44	75.809	4.98	17.144	7.637	65.271	25.346	8.891	34.454	1.65	9.356	8.447	1.65	0.058	21.726	5.563	78.856	34.393	240.218	8.219	1.43	8.168	2.764	27.157	112.932	53.358	0.624	5.057	26.12	10.705	2.523	50.825	32.037
63001	16.69	385.818	74.43	44.519	45.931	0.446	2.116	80.298	29.869	41.563	68.432	8.289	17.818	5.64	56.662	33.151	9.909	25.471	0	11.629	8.266	1.2	2.518	25.536	5.605	53.872	41.632	208.111	5.876	0.82	4.539	1.459	27.32	78.659	62.85	1.326	8.004	29.986	15.823	5.513	82.044	47.628
64001	13.579	176.662	25.377	15.165	8.071	0.048	2.848	63.623	17.695	14.52	38.894	0.68	6.643	4.696	25.828	12.16	3.776	10.105	0.3	5.491	3.678	0.9	0.724	8.44	1.338	40.981	11.054	90.607	4.106	0.3	3.352	2.249	15.076	32.204	38.639	0.9	0.939	2.891	1.072	3.154	12.828	4.533
65001	32.813	204.767	29.826	11.951	11.334	0.049	1.2	58.873	32.388	18.834	58.479	0	8.185	4.716	36.931	13.28	4.627	35.635	0.3	2.639	1.442	1.188	0	12.287	1.705	49.503	16.727	132.596	2.093	0.626	6.506	2.978	24.829	29.079	42.663	1.8	0	0.1	0	0.627	0.6	0.5
66001	16.959	206.88	54.83	23.07	13.033	0.251	0.596	93.833	16.255	23.692	57.203	0.204	8.989	4.868	26.894	15.98	3.102	15.471	0.15	4.119	7.103	2.007	0.15	9.722	3.094	35.45	24.099	178.085	6.964	0.811	4.336	0.748	19.697	65.186	44.708	0.899	0	0.1	0	0.3	0.198	0
67001	10.074	181.116	48.652	43.139	20.122	0.258	1.125	68.462	8.623	23.12	43.042	0.096	10.4	6.061	24.186	13.714	3.928	7.556	0.288	12.729	5.679	0.306	0.113	5.65	1.911	53.938	8.401	160.541	8.057	2.28	3.566	1.239	28.943	62.986	64.899	1.065	0.003	0	0	1	0	0.204
68001	38.983	310.091	99.772	23.684	26.911	0.342	1.124	164.817	37.857	44.101	115.052	1.046	20.975	4.484	59.46	36.378	10.139	31.858	0.162	7.778	8.377	1.593	0.486	24.808	7.676	65.278	30.286	270.046	4.876	1.378	10.603	2.163	25.599	50.513	51.02	2.901	0.497	0.197	0	0.1	0.499	1.491
69001	14.276	324.086	34.575	44.864	16.377	0.3	0.712	63.31	12.708	28.704	43.476	0.377	17.534	0.39	34.529	20.213	5.205	10.291	0.342	7.624	11.379	0.571	0	15.138	4.748	58.302	12.336	145.142	6.709	0.871	1.943	1.861	20.022	98.294	36.08	1.004	0	0	0	0	0.2	0.3
70001	18.77	489.866	53.854	74.691	31.525	0.3	1.261	75.166	30.187	74.681	71.237	1.271	21.227	4.118	84.886	23.13	10.905	20.565	1.677	9.419	6.56	0.929	0	16.296	5.53	107.296	31.301	361.225	9.06	0.479	5.181	0.655	26.942	133.094	47.743	1.388	0	0.2	0	0	0.189	1.1
71001	26.235	736.988	65.414	117.683	31.877	0.15	1.177	100.499	39.131	90.025	98.845	1.345	44.48	3.742	186.591	27.288	10.315	20.734	0.531	7.69	12.794	1.05	0	14.747	4.122	133.508	32.372	558.784	31.94	2.1	9.661	1.877	28.808	181.158	60.045	2.789	0	0	0	0	0.011	0.2
72001	38.018	808.205	75.479	155.183	79.197	1.35	1.263	100.077	40.098	84.529	150.554	0.907	57.674	9.432	162.019	46.416	17.82	22.814	0	13.356	13.98	1.689	0.6	20.399	10.233	153.467	35.297	466.522	20.458	1.35	12.374	1.95	47.434	190.86	85.592	2.102	0.2	0.2	0	0	0.651	0.5
73001	30.401	1232.7	85.447	266.972	68.775	0.6	1.222	123.118	60.471	132.481	152.424	1.611	58.826	8.775	262.816	56.975	14.347	23.9	1.261	9.237	8.005	1.767	0	24.763	6.461	261.378	53.774	864.217	32.993	2.15	14.28	2.298	67.421	330.536	148.03	4.22	1.231	2.089	0.5	3.799	2.854	9.807
74001	42.03	1157.69	102.565	224.646	89.023	0	1.775	124.328	67.294	114.804	154.484	3.639	48.125	14.275	166.615	53.332	16.003	42.627	1.289	23.575	32.428	2.994	0.45	38.183	13.948	238.138	67.959	983.682	43.224	2.195	17.053	4.002	93.056	385.954	166.608	2.39	1.168	2.436	0.6	3.349	4.131	15.383
75001	24.357	333.908	52.528	54.513	49.291	0.15	2.325	81.634	37.747	49.062	62.797	1.65	21.6	4.412	43.308	31.343	12.714	22.516	0.75	8.736	6.798	1.35	0	12.633	6.552	72.409	40.678	225.512	2.157	0.305	7.446	2.25	24.83	73.955	45.406	0.585	1.3	5.466	0.4	3.749	3.558	11.91
76001	22.825	167.139	55.511	15.116	10.625	0	0.576	50.966	61.876	19.5	54.281	0.169	11.541	2.367	30.45	26.853	3.156	30.462	0	3.148	5.395	1.486	0.15	14.217	1.444	32.575	39.111	149.37	2.11	0.936	8.355	1.609	11.852	22.799	26.094	0	0.2	0.251	0	0	0	0.4
77001	55.209	595.664	140.439	64.08	47.135	0.3	0.924	137.867	151.367	54.782	166.125	1.631	31.725	4.477	109.523	106.189	8.763	100.74	0.3	11.096	15.406	3.313	0.9	34.889	9.883	87.819	108.355	492.879	11.216	2.031	17.806	0.791	47.273	137.214	90.481	1.5	0	0.249	0	0	0	0.6
78001	24.854	225.795	38.694	27.712	14.446	0.6	0.75	55.021	50.023	22.108	46.931	0.658	7.865	3.147	28.202	25.096	3.806	29.956	0.545	4.952	3.53	1.681	0.099	10.095	3.658	43.835	36.03	162.898	3.027	1.434	6.674	0.9	11.646	35.956	26.596	0.781	0	0.169	0	0.106	0.1	0
79001	21.155	334.974	69.904	38.236	30.175	0.418	0.3	71.423	54.087	30.771	54.354	3.092	14.7	5.6	42.305	42.053	8.265	28.399	0.355	7.177	9.116	0.869	0.201	15.788	6.004	57.522	42.213	205.025	8.346	0.233	5.993	1.199	25.004	81.363	42.072	0.269	0.1	1.031	0	0.394	0.3	1.2
80001	21.95	647.4	99.193	115.273	60.037	0.332	1.344	141.485	39.648	71.623	101.268	1.2	39.193	6.046	121.63	51.053	11.05	17.236	0.062	5.569	10.261	1.056	0.6	22.704	6.805	110.997	51.458	364.313	18.457	0.594	8.708	0.754	50.096	178.743	84.533	1.269	0	0	0.1	0	0	1.167
81001	17.353	670.173	84.968	145.816	37.667	0.75	1.806	102.943	32.047	78.008	82.526	1.987	38.016	9.948	118.86	41.958	10.446	16.781	1.849	8.644	11.943	2.89	0	17.378	8.393	120.702	32.304	352.47	22.12	1.372	11.514	2.247	48.407	209.318	99.634	2.264	0	0.1	0	0.007	0.2	0.133
82001	31.856	1235.44	134.72	221.267	60.47	0	2.591	158.84	50.099	116.839	140.823	2.894	74.599	11.84	301.862	75.243	16.32	25.817	1.089	7.673	16.867	4.148	0.3	27.918	8.896	216.26	60.099	1001.1	56.39	2.032	9.317	1.691	107.689	451.579	198.861	2.403	0	0.2	0	0.193	0	1.1
83001	23.755	304.79	84.56	43.363	32.325	0.6	1.606	108.854	32.515	34.435	75.116	3.366	20.708	7.394	63.187	31.981	10.93	14.575	1.2	6.923	8.621	2.103	0	14.036	5.314	58.411	40.427	188.02	4.32	0.365	7.679	1.759	34.573	78.399	63.81	1.564	0	0	0	0	0	0.2
84001	10.36	89.509	19.776	10.658	19.35	0.3	0.45	27.998	9.301	12.766	26.041	0.15	5.519	1.512	18.639	12.606	4.65	4.65	0	1.65	3.6	0.3	0	4.35	1.05	19.1	12.624	51.372	2.854	0	3.3	0.15	8.571	24.899	12.038	0.15	0	0.132	0	0	0	0
85001	8.765	901.506	55.642	259.518	40.65	0	0.75	52.064	12.176	160.367	80.842	1.35	59.308	4.001	189.169	21.189	8.685	4.05	0	3.985	5.45	1.05	0.248	7.757	2.628	162.969	15.541	878.549	49.575	0.15	1.347	1.486	86.823	407.284	135.235	0.754	0	0.068	0	0	0	0.046
86001	10.512	187.553	27.712	15.737	19.279	0	1.35	28.083	15.022	21.434	19.188	1.2	11.689	3.02	39.188	9.142	5.518	4.02	0	3.502	5.843	2.292	0.052	7.439	3.258	25.938	13.388	116.542	5.175	0.15	2.388	0.164	16.388	66.789	27.628	0.596	0	0	0	0.3	0	0.727
87001	6.222	288.93	38.431	60.58	28.255	0.299	0.75	34.593	16.45	37.931	37.795	2.096	9.699	6.476	32.633	15.415	8.296	4.076	0	6.611	4.306	1.008	0	7.751	4.463	36.232	17.264	150.27	2.25	0	1.214	0.75	26.234	64.71	45.474	0.9	0	0	0	0	0	0.227
88001	0.347	2.473	0.357	0.881	0.267	0	0	0.271	0.306	0.387	0.68	0.056	0.126	0.003	0.376	0.485	0.122	0.403	0.027	0	0.023	0.042	0.009	0.042	0	0.407	0.435	1.639	0.068	0	0.004	0	0.045	0.714	0.18	0	0	0	0	0	0.1	0
89001	42.651	822.566	131.69	158.215	110.823	0.945	0.485	108.377	190.789	108.956	129.357	1.734	61.446	6.501	180.879	237.824	33.575	97.059	0.423	3.057	6.162	3.1	1.041	12.617	5.22	158.401	171.254	603.256	29.891	0.47	6.644	2.849	59.018	226.404	104.777	1.676	0	0	0	0	0	0.2
90001	55.898	1351.31	231.42	248.454	155.43	2.251	4.189	169.886	265.345	192.311	163.905	1.81	98.072	12.465	253.675	346.174	51.368	136.327	0.9	8.888	17.302	4.358	0.198	21.524	11.463	264.444	238.331	907.983	52.275	2.53	7.8	2.551	114.932	427.731	160.859	4.678	0	0	0	0.1	0	0.7
91001	44.61	343.681	97.673	66.248	75.482	3.095	2.6	65.885	74.449	53.167	81.906	2.149	26.324	4.69	49.14	91.756	28.424	51.223	0.6	8.11	7.986	1.302	1.451	10.317	6.932	84.451	94.279	248.917	9.768	0	5.146	0.927	37.503	114.921	48.138	1.306	0	0	0	0	0	0.311
92001	245.987	935.584	386.908	62.475	232.718	10.509	0.26	229.484	490.745	179.2	473.443	12.401	73.579	5.972	203.276	521.386	74.946	437.429	2.1	11.417	16.836	8.598	4.949	68.547	20.044	194.515	416.799	880.919	8.492	0.432	44.604	3.123	61.585	84.745	146.052	1.19	0	0	0	0.2	0	0.989
93001	20.022	306.742	62.856	61.515	20.317	0	1.498	70.491	28.45	34.884	36.299	0.573	18.756	7.392	34.057	17.965	6.125	18.912	0.216	9.232	10.137	1.111	0	12.914	6.855	56.288	21.634	156.015	8.525	1.368	4.63	2.249	35.442	113.622	40.015	0.701	0	0	0	0	0	0.6
94001	46.734	407.736	56.977	29.596	48.371	0.031	0.715	126.404	80.205	32.93	99.741	3.717	18.246	1.906	56.715	66.68	6.337	58.355	0.161	4.706	4.713	3.77	0.298	26.843	5.908	64.891	71.459	270.207	2.077	0	15.107	0.381	15.474	47.423	45.716	1.115	0	0	0	0.099	0	0.5
95001	36.773	852.627	88.866	202.572	57.57	0.269	1.2	115.29	70.293	96.956	162.191	4.035	40.382	9.054	166.548	80.658	11.133	55.77	0.523	3.886	5.91	1.989	0.15	38.604	6.923	204.787	77.88	849.04	34.987	0.3	9.217	1.899	56.828	259.77	145.173	2.673	0	0.2	0	0	0	0.3
96001	38.943	818.898	84.59	151.088	60.595	1.2	1.2	114.913	48.414	82.101	141.287	1.117	44.58	6.017	171.582	84.81	13.433	49.246	1.35	7.388	7.285	2.121	0.026	22.954	8.026	146.826	60.182	639.973	29.4	0.9	8.062	0.591	53.771	195.765	101.968	1.2	0	0.3	0	0	0.1	1
97001	21.313	364.081	43.803	63.977	30.131	0.3	1.139	66.56	31.943	39.113	74.717	0.45	19.982	2.124	56.107	32.476	6.17	21.645	0.224	3.79	7.193	2.003	0.274	17.714	4.271	88.354	36.665	254.291	10.006	0.159	7.356	1.318	22.992	89.453	51.502	0.606	0	0.3	0.2	0	0.5	1.1
98001	49.628	1082.34	94.988	175.096	42.883	1.8	2.311	105.216	58.494	110.748	143.368	3.809	48.59	6.414	176.112	61.927	18.288	39.624	0.976	10.483	11.768	1.836	0	29.825	5.479	208.672	75.527	585.578	28.244	0.891	10.368	2.112	58.189	287.754	105.639	2.094	0	0.726	0	0.4	0	1
99001	67.006	585.361	64.405	46.845	74.266	1.662	0.679	64.645	97.687	36.512	195.8	5.359	24.098	2.578	97.561	101.839	9.53	89.654	0.684	6.486	5.611	2.834	1.396	40.376	2.922	85.219	118.724	429.41	9.541	0.513	15.213	0.3	27.44	97.285	79.95	0.689	0.105	1.344	0	0.5	0.727	2.031
100001	96.148	916.958	111.023	122.98	39.914	0.438	2.98	120.922	124.546	86.691	212.585	1.027	44.288	5.305	177.921	68.259	9.699	164.644	0.614	6.465	10.896	1.333	0.104	27.056	5.899	174.173	56.041	624.781	21.943	0.986	21.669	1.852	55.841	171.702	93.785	2.412	0.095	0.13	0	0	0.073	0.069
101001	74.287	2489.57	169.236	721.401	64.181	0.3	4.637	160.908	80.74	381.034	226.886	2.449	168.776	20.051	579.515	70.314	31.001	118.099	0.801	7.274	165.359	5.73	0.57	77.08	30.432	538.516	43.114	1914.57	115.803	1.706	18.806	0.848	205.69	1005.55	327.648	4.33	0	0	0	0	0	0
102001	25.899	1337.34	101.439	280.374	37.432	0.3	2.505	109.31	51.642	148.816	104.01	1.006	78.845	9.859	247.096	44.762	13.963	32.401	0.6	11.509	38.44	2.065	0.33	33.58	9.369	234.653	26.077	748.262	41.65	0.86	8.107	1.8	88.427	362.611	134.21	3.367	0	0	0	0	0	0
103001	19.589	415.138	57.361	57.413	23.242	0.45	1.943	62.524	23.85	44.934	55.601	0.3	23.046	8.527	67.496	16.963	6.444	29.417	1.413	6.199	13.028	1.466	0	14.285	3.688	66.041	10.677	237.256	13.501	2.984	8.516	0.774	24.818	92.612	50.798	1.097	0	0	0	0	0	0
104001	30.834	1215.46	105.337	238.493	33.83	1.05	2.152	82.809	71.146	101.926	126.782	0.007	62.081	11.085	294.133	70.63	14.582	42.04	0.884	7.782	35.953	3.219	0	38.958	8.438	259.477	69.684	1014.43	67.084	2.596	7.986	1.176	131.524	435.275	150.314	1.894	0	0	0	0	0	0
105001	54.346	2222.52	182.839	491.364	45.663	0.582	3.719	145.332	138.629	188.384	215.357	1.036	132.462	16.797	567.888	148.543	33.682	88.948	0.999	7.36	19.124	1.413	0.1	58.255	8.952	542.387	126.08	1994.57	167.132	1.601	10.516	2.099	223.461	987.036	330.303	5.417	0	0	0	0	0	0
106001	75.3	2766.61	229.857	595.913	51.476	1.668	1.766	130.51	184.969	225.63	261.555	0.157	148.162	16.221	569.824	120.326	28.611	127.557	1.043	12.865	42.481	2.663	0.35	70.289	15.67	666.754	128.616	2191.22	117.295	1.947	18.318	4.554	272.642	873.622	297.6	6.217	0	0	0	0	0	0
107001	220.053	1789.94	260.871	41.451	63.328	1.614	0.463	255.45	449.945	80.949	429.277	7.668	70.18	3.28	203.098	246.182	15.941	476.403	1.357	12.006	14.64	3.74	0.365	87.984	12.436	269.777	212.603	909.918	8.642	1.056	58.888	2.35	51.383	70.692	151.485	5.456	0	0	0	0	0	0
108001	306.19	1509.09	315.518	43.35	30.131	1.536	1.95	429.765	340.992	60.637	783.826	1.54	91.544	4.508	264.369	185.498	8.445	460.103	0.986	16.773	18.14	6.079	0.685	100.399	15.65	347.314	192.156	1347.68	12.609	0.769	64.389	2.048	87.859	81.278	307.869	6.924	0	0	0	0	0	0
109001	976.906	3184.16	776.34	47.692	28.6	0	0.6	1214.63	744.633	92.358	2288.4	0.692	243.482	2.718	698.306	307.503	12.351	1004.05	1.714	20.152	33.704	13.468	0	236.849	39.337	887.193	450.094	3347.28	25.37	1.181	180.645	4.399	176.612	82.369	470.176	17.695	0	0	0	0.2	0	0
110001	1004.19	3765.91	863.994	57.57	25.414	0.15	0.876	1187.08	843.372	109.049	1964.26	0.3	292.497	2.521	776.397	204.668	7.177	1418.97	1.95	29.818	39.728	12.286	0	315.544	38.408	1027.51	522.665	3192.07	33.129	0.9	202.295	1.122	181.028	103.028	460.621	16.307	0	0	0	0	0	0
111001	64.161	1064.56	109.416	177.461	23.198	0.259	1.8	108.457	126.12	76.134	172.663	0.266	61.715	8.476	221.404	55.213	9.057	91.92	1.127	9.666	13.378	1.924	0	40.53	7.904	225.032	57.576	657.735	59.401	0.867	12.511	1.717	88.103	343.369	148.121	1.987	0	0	0	0	0	0.2
112001	101.372	4006.09	329.105	750.44	69.356	0.941	7.653	231.204	147.911	272.295	415.877	0.334	212.452	26.004	956.419	201.413	35.478	190.438	1.569	11.065	48.707	4.36	0	88.666	21.825	864.256	98.891	2455.07	270.098	0.783	27.652	6.787	385.423	1432.68	570.586	6.897	0	0	0	0	0	0
113001	83.028	2647.91	190.727	562.051	43.725	1.2	3.621	152.567	140.036	251.246	288.148	0	162.507	16.463	515.801	194.435	25.705	121.401	0.721	6.568	10.021	2.029	0.3	48.861	7.137	509.788	77.054	1780.34	115.407	0.944	21.72	2.658	202.32	817.796	383.961	3.309	0	0	0	0	0	0
114001	71.129	2277.22	210.784	474.678	55.676	0.886	2.038	135.898	113.114	198.818	327.433	0.6	116.813	15.506	481.28	186.671	21.78	143.74	0.783	8.936	9.197	3.533	0	50.741	10.547	473.264	80.2	1503.31	99.221	0.917	18.452	2.742	175.244	653.054	296.063	7.683	0	0	0	0	0	0.2
115001	47.223	1561.74	139.534	285.834	35.376	0.314	2.462	104.279	68.317	125.195	134.978	0	86.242	13.53	299.82	89.829	15.392	49.822	1.5	11.345	39.612	1.217	0	32.092	10.058	267.584	41.84	873.577	75.523	1.289	11.369	3.574	114.251	475.623	229.196	4.017	0	0	0	0	0	0.1
116001	10.707	583.856	37.07	96.12	17.203	0	0.3	50.697	24.061	55.183	51.333	0	26.915	3.76	104.096	30.479	8.014	24.122	0.15	2.029	2.796	0.384	0	7.778	1.5	106.263	17.659	342.336	12.803	0	4.3	0.976	30.528	123.228	59.967	1.05	0	0	0	0.2	0	0
117001	26.456	1548.27	104.374	319.152	46.984	0.75	3.45	90.45	52.034	216.815	160.116	0.6	71.145	11.006	253.129	62.289	17.425	46.807	1.913	4.04	4.887	0.966	0	17.036	4.211	282.617	41	880.777	28.191	1.031	10.419	3.52	91.794	412.57	182.95	2.782	0.1	0	0	0	0	0.2
118001	37.436	1429.86	108.527	339.062	30.772	1.35	1.822	82.051	88.064	132.284	131.643	0	82.156	10.526	317.742	65.958	15.364	47.566	0.197	10.031	17.394	1.95	0.15	24.94	5.847	292.351	50.388	1327.23	86.061	0.794	7.195	1.653	130.515	533.697	232.117	5.018	0	0	0	0	0	0
119001	13.233	773.912	63.224	143.875	21.698	0	1.261	45.985	34.496	58.694	66.721	0.324	38.837	5.449	154.64	23.813	6.26	35.256	0.29	4.793	6.31	1.155	0.15	16.349	4.406	131.458	28.978	430.885	20.339	1.025	4.248	0.3	39.06	253.468	72.887	1.41	0	0	0	0	0	0
120001	24.56	472.606	64.222	31.467	36.486	0.3	1.336	44.501	61.738	32.473	116.304	0.726	15.048	1.709	62.561	35.278	8.241	69.94	0	5.315	3.681	0.719	0	22.763	3.785	48.131	57.125	278.84	4.325	0.3	13.476	1.143	16.434	62.662	44.435	0.99	0	0	0	0.1	0	0.567
121001	56.984	629.431	120.385	61.539	33.501	0.103	1.201	147.076	128.615	45.622	185.592	0.741	36.585	3.665	96.734	92.292	11.416	87.163	0.15	5.081	10.962	2.513	0	24.384	7.555	104.862	84.353	431.569	10.098	0.577	12.472	0.916	34.924	110.853	75.798	1.714	0	0	0	0	0.2	0.138
122001	234.023	1689.45	359.793	169.509	112.621	3.489	1.092	411.963	401.534	122.001	530.732	3.272	107.862	9.862	418.207	347.244	38.136	298.253	0	10.713	19.339	8.151	1.729	99.318	18.244	301.673	305.354	1688.09	43.793	0.322	66.305	1.876	121.261	354.552	213.044	3.578	0	0	0	0	0	0.395
123001	459.547	3378.39	610.836	512.329	264.23	5.008	4.889	561.61	938.307	286.603	1082.99	4.217	204.529	13.701	944.946	671.401	76.679	659.934	1.8	17.694	35.595	20.298	1.706	205.716	42.096	555.174	674.795	3376.29	104.572	0.458	143.135	2.838	228.328	685.161	458.922	6.539	0.053	0	0	0	0	0.6
124001	341.797	2061.31	491.979	241.551	180.791	2.347	1.728	312.116	690.239	158.049	809.505	4.068	114.412	7.718	575.915	411.012	34.51	434.964	0.6	11.781	15.473	9.562	0.765	143.795	27.004	306.453	411.241	1995.75	52.461	1.642	81.986	1.771	99.567	319.844	200.897	6.616	0.147	0	0	0	0	0.2
125001	13.486	1260.97	76.749	346.926	54.829	0.3	2.552	65.943	8.378	116.005	58.681	1.194	69.871	10.181	281.691	23.041	14.813	8.877	0	9.349	41.557	3.305	0.144	21.551	6.601	257.427	16.825	778.378	84.243	1.341	1.575	2.1	129.776	477.911	168.077	3.705	0	0.4	0	0	0.3	1.275
126001	22.444	446.036	53.836	64.751	69.837	0.45	1.8	64.277	39.277	58.433	80.992	2.476	23.886	2.183	87.106	37.764	7.262	35.848	0.3	7.499	6.325	0.57	0	11.556	5.609	68.868	29.496	260.381	6.631	0.525	6.329	1.51	19.852	104.59	42.769	1.5	0	0.7	0	0.2	0.4	0.313
127001	25.233	502.671	62.411	90.372	84.361	0.15	1.35	69.67	50.273	60.212	97.686	4.05	37.612	3.817	132.316	46.686	7.738	42.478	0.3	7.051	7.431	0.78	0	15.294	3.991	98.23	42.203	409.797	17.368	0.675	7.62	1.64	29.222	135.857	65.582	0.674	0.2	2.713	0	0	0.519	0.609
128001	17.242	300.211	43.541	29.754	15.547	0.3	0.793	26.989	25.655	22.2	51.672	0.824	14.264	1.822	30.268	14.613	5.174	31.594	0	4.121	9.953	1.2	0	10.355	7.803	44.931	14.777	176.874	4.532	0.672	3.597	0.6	20.51	81.161	42.7	1.276	0	0.287	0	0	0.081	0
129001	47.341	531.759	76.715	58.968	55.925	0.34	1.395	79.634	100.229	46.299	117.232	10.505	33.589	7.891	114.366	48.794	9.926	45.739	1.103	10.905	14.572	2.13	0.557	16.318	8.203	70.043	57.548	358.231	13.452	0.965	8.782	1.6	32.558	114.218	74.917	0.974	0	0.3	0	0.659	0.552	4.124
130001	31.573	324.721	76.721	47.294	69.695	2.011	0.579	60.697	95.453	34.358	81.396	14.114	23.754	4.621	70.967	51.178	14.161	46.227	0.529	8.333	7.263	1.32	2.265	17.682	6.198	56.954	57.362	245.367	7.221	0.613	6.173	0.438	36.875	100.155	64.949	1.276	0.7	0.507	0.314	1.56	1.708	10.827
131001	23.824	636.168	98.404	89.343	62.292	2.143	0.98	84.799	63.982	79.854	96.749	8.207	42.427	7.843	146.872	51.541	19.912	35.643	2.418	16.934	19.638	1.5	1.228	17.796	8.206	100.154	51.264	430.548	20.647	1.488	4.981	2.004	54.344	207.798	114.15	5.088	0.4	3.288	0.286	1.875	2.634	15.969
132001	837.012	2405.76	952.158	308.091	203.345	8.152	1.2	1112.55	2374.96	221.528	1437.91	13.551	198.694	15.719	844.157	1080.76	68.394	1404.8	2.698	25.358	50.667	30.348	2.224	254.562	34.9	398.113	1061.87	4011.17	41.786	0.456	100.603	3.632	154.598	334.867	300.412	10.367	0.42	3.764	0.488	0.6	3.041	19.62
133001	365.751	1355.57	273.982	47.591	115.559	2.648	0.9	536.177	1403.94	69.91	333.508	17.522	77.844	6.195	219.982	334.84	18.762	542.981	2.463	9.635	13.393	5.192	2.426	121.187	18.636	135.43	383.54	1750.86	5.887	0.744	64.744	2.024	41.087	69.42	82.375	2.683	1.191	2.439	0.594	1.506	1.701	12.785
134001	24.191	185.206	37.016	23.155	29.075	0	1.551	34.224	36.287	14.99	50.401	5.824	12.461	3.208	20.805	13.487	6.168	12.526	0.344	9.467	5.538	0.46	0	9.456	5.937	37.019	23.553	142.041	1.65	0.949	3.115	1.699	29.291	46.818	38.45	0.459	2.109	8.253	1.627	1.918	5.106	25.281
135001	17.052	267.348	53.167	46.878	37.541	0.998	1.143	41.225	26.704	34.732	54.111	1.303	12.887	4.381	43.828	21.425	7.369	17.46	0.641	9.218	11.5	0.741	0.15	12.932	2.33	33.553	21.441	190.201	7.649	0.551	2.814	1.797	23.639	74.801	60.751	0.887	1.675	5.192	2.223	1.676	5.929	21.621
136001	48.383	438.965	112.006	70.744	53.306	1.252	1.206	76.414	101.474	72.704	142.446	6.5	27.496	2.783	114.804	59.554	15.014	60.554	1.176	8.346	11.535	2.746	0	21.482	9.036	53.166	73.353	436.732	10.221	0	5.53	1.054	30.366	96.396	89.81	2.568	1.6	8.685	2.052	3.645	7.696	23.051
137001	106.461	2167.8	259.962	461.881	85.744	1.947	2.052	226.244	239.332	173.082	276.1	6.9	112.997	14.676	429.224	162.613	22.347	149.622	1.475	10.919	49.849	9.876	0	77.139	18.637	393.24	148.854	1586.96	104.044	1.215	21.962	3.194	185.825	745.922	295.296	7.034	1.2	4.784	1.116	2.331	8.058	13.692
138001	37.631	329.485	64.503	42.26	15.839	2.287	1.765	60.144	75.685	24.037	71.746	1.273	16.431	4.208	47.2	48.69	10.133	33.817	1.459	6.147	7.953	2.557	0	14.565	3.617	41.558	36.505	232.427	6.488	1.473	8.313	1.259	43.927	71.876	59.758	0.902	0.8	2.481	1.064	1.577	5.501	14.484
139001	107.22	665.572	142.682	63.985	56.987	0.716	1.283	141.194	187.005	56.731	216.246	6.617	32.652	4.305	128.567	80.17	14.016	137.853	0.687	9.447	12.547	3.739	0.093	39.081	10.425	91.779	111.159	668.472	6.928	0.762	22.219	2.974	34.493	90.125	126.928	0.84	1.976	4.124	0.661	3.472	6.207	21.249
140001	36.274	766.71	109.812	131.427	39.349	2.1	0.45	91.542	79.317	91.448	104.22	5.156	42.221	7.689	179.088	56.716	16.194	32.96	1.026	5.724	8.879	1.668	0.207	21.254	4.396	137.595	68.64	469.876	29.75	0.058	12.09	1.269	47.555	240.063	102.329	3.236	0.224	2.204	0.272	1.174	3.134	11.269
141001	48.958	433.688	64.565	32.446	36.757	0.6	0.824	55.993	121.397	45.483	87.802	2.55	14.851	4.802	54.705	53.329	8.724	56.119	0.338	5.853	6.628	1.017	0.29	15.881	5.803	66.719	65.091	298.694	6.426	1.742	7.481	1.216	22.904	64.17	54.417	0.274	0.2	0.661	0.7	0.399	1.627	4.282
142001	93.667	587.354	214.03	74.728	113.901	5.966	0.82	281.376	217.765	105.775	208.587	4.9	49.359	5.64	150.993	357.883	33.268	103.903	1.177	11.112	10.552	4.05	2.41	47.323	12.09	147.985	132.02	553.202	16.817	0.747	13.408	1.478	55.735	123.909	140.357	3.391	0	0	0	0	0.5	0.2
143001	89.058	453.885	256.807	66.851	71.047	6.772	0.3	382.417	181.035	110.007	231.611	2.747	40.668	7.063	106.477	207.207	45.5	98.139	0.75	6.484	17.46	5.85	4.35	37.977	14.413	93.628	128.067	409.463	5.449	0.3	13.535	0.45	43.104	61.631	124.432	5.009	0	0	0	0	0	0.3
144001	23.449	165.118	74.854	21.276	39.379	1.65	0.75	95.231	67.951	36.279	58.613	1.635	11.393	3.765	37.002	58.65	15.718	21.174	0.19	5.113	6.213	2.182	0.75	9.117	4.476	31.148	50.256	144.267	1.95	0	4.635	0.19	16.869	33.728	38.692	0.573	0	0	0	0	0	0.1
145001	73.835	580.703	158.851	120.753	106.657	4.994	4.469	164.486	148.147	101.546	163.847	3.312	37.846	14.456	111.59	168.276	31.937	68.201	1.712	12.867	20.58	2.395	1.516	27.289	7.409	109.101	104.957	402.165	20.161	2.235	9.322	2.786	64.512	217.766	108.036	1.99	0	0.164	0	0	0.151	1.364
146001	61.77	554.094	165.301	85.179	111.648	4.155	1.957	131.535	149.327	72.489	130.306	1.989	38.143	7.751	96.816	152.06	33.243	83.613	0.638	7.181	13.602	2.557	1.932	19.351	9.997	147.48	129.889	392.921	31.902	1.123	4.563	0.931	48.953	156.243	87.416	1.748	0	0.233	0	0	0.049	0.436
147001	206.114	927.255	778.741	254.119	291.304	20.572	2.513	544.853	651.597	236.768	483.733	9.288	103.986	21.341	252.627	633.642	163.49	336.402	3.368	32.452	40.161	12.932	2.847	64.905	34.42	202.018	461.106	998.722	32.795	1.592	27.472	2.093	110.787	238.057	309.937	4.137	0	0	0	0.2	0	1.162
148001	19.133	1632.86	124.478	398.429	64.163	0.591	1.783	116.192	45.422	166.57	113.388	1.522	87.226	9.916	298.351	64.689	13.605	23.071	0.935	4.547	32.37	3.962	0	35.451	6.331	321.002	37.543	891.713	62.9	0.402	6.286	1.923	148.02	554.12	177.03	3.463	0	0	0	0.12	0	0.502
149001	35.654	3300.89	214.085	692.749	139.713	1.575	5.214	194.412	36.435	299.745	138.499	1.992	180.212	21.077	666.552	92.582	29.935	31.09	0.507	8.32	56.718	5.676	0	62.271	19.997	633.158	41.786	1951.5	186.844	0.648	9.48	2.393	303.997	1337.85	415.435	6.32	0.1	0.022	0	0.08	0	0.654
150001	24.334	1401.06	100.646	271.135	84.517	1.255	3.021	103.474	31.507	146.354	114.909	1.836	65.994	13.281	245.493	58.645	18.09	19.972	0.563	11.568	18.775	1.792	0.3	13.174	6.922	229.402	31.07	642.84	40.343	1.595	9.599	4.084	94.7	371.821	134.346	2.619	0.1	0.578	0	0.2	0	0.275
151001	24.748	2636.53	189.479	596.566	86.873	1.138	3.591	134.072	29.527	213.021	95.53	2.749	147.754	17.653	551.166	54.216	22.288	16.496	1.44	6.871	149.729	4.553	0.15	70.921	19.837	522.921	25.409	1351.8	176.708	1.058	6.791	1.956	232.582	1098.23	258.725	8.201	0	0.3	0.246	0	0	0.607
152001	27.118	2676.23	158.086	623.459	127.117	1.173	3.604	127.377	34.709	289.985	137.078	2.223	153.529	13.696	582.5	67.029	29.4	19.549	0.547	6.963	41.412	2.062	0	48.309	9.265	505.04	39.754	1789.67	137.289	2.665	7.183	3.144	234.458	944.054	298.934	6.305	0.4	0.404	0.054	0.2	0.2	1.057
153001	21.067	1282.74	91.858	300.238	172.942	0.479	2.339	86.201	36.691	166.115	107.594	2.1	59.972	10.198	238.318	62.121	19.206	23.111	0.423	7.271	8.238	1.785	0.282	25.069	5.981	263.671	51.66	775.538	34.444	1.009	9.531	0.969	82.703	390.417	140.168	2.435	0.2	0.824	0	0.4	0.2	1.633
154001	19.172	1226.48	93.744	299.18	77.66	0.21	1.059	76.018	22.877	135.235	74.679	1.2	48.094	6.062	205.948	30.775	12.396	16.875	0.477	5.895	6.994	0.6	0.318	16.363	6.002	241.061	28.707	790.984	45.796	0.872	5.191	1.281	92.779	498.334	136.615	1.958	0	0.972	0	0.3	0.4	0.51
155001	13.435	751.794	52.767	153.756	156.903	0.3	0	53.264	25.476	85.455	57.236	3.45	24.252	6.312	126.113	33.472	17.199	19.789	0.546	7.659	5.031	0.15	0	10.583	5.014	111.693	50.768	354.442	17.336	0.483	5.954	2.122	37.326	194.397	73.946	1.014	0.1	3.708	0	0.599	0.97	1.525
156001	9.516	193.254	24.274	32.668	89.805	0.6	0	32.488	19.393	20.559	23.019	1.35	9.811	2.988	32.922	31.157	5.843	11.621	0.054	2.6	3.361	0.3	0.45	8.796	4.287	28.961	37.008	131.51	3.514	1.017	6.188	0.578	17.879	50.697	31.06	0.036	0.316	3.096	0	0.401	0.63	0.875
157001	115.048	700.741	96.034	67.676	86.337	1.35	0.6	241.988	365.475	46.315	269.21	1.5	45.478	1.2	129.619	463.96	16.049	200.706	0.45	6.541	6.315	3	1.05	48.146	11.999	61.232	354.509	751.051	5.548	0.3	36.448	1.65	34.595	31.95	108.734	1.649	0.482	0.196	0	0	0	0.1
158001	36.27	443.791	46.371	106.477	36.455	0.398	2.1	79.95	86.876	63.732	110.985	0.634	40.627	5.282	136.642	63.283	9.663	65.368	0.45	8.084	6.065	1.286	0	16.97	5.279	82.116	53.649	374.154	22.02	1.125	6	0.75	56.086	78.45	82.969	2.7	0	0.4	0	0.1	0	0
159001	56.375	404.199	95.342	61.948	28.556	0.546	2.1	158.718	76.324	48.899	198.686	0.258	32.202	4.278	85.459	67.152	8.006	58.746	0.319	10.126	11.185	4.25	0	16.069	6.901	86.742	64.295	267.529	10.605	2.013	8.991	1.178	57.669	35.041	90.209	0.921	0	0.1	0	1.1	0	0.2
160001	114.276	891.097	257.489	115.593	56.854	0.552	2.214	203.46	173.711	61.586	426.112	1.05	54.149	7.737	221.432	158.088	11.123	159.035	0.415	9.671	12.977	4.258	0	60.462	12.309	154.575	125.134	676.748	11.783	1.062	29.659	0.645	55.396	113.778	103.082	1.988	0	0	0	0	0	0.2
161001	89.521	1461.89	167.595	359.502	37.847	0.6	3.182	131.664	80.498	127.05	377.882	0	108.608	14.658	407.936	157.23	14.181	95.017	0.316	5.828	13.59	2.675	0	49.244	8.4	327.678	102.004	675.409	36.958	0.3	11.883	1.233	66.087	263.083	210.596	4.537	0	0	0	0	0	0
162001	99.935	1461.24	140.203	256.745	23.023	0.3	2.817	182.298	189.131	141.011	232.633	0.15	65.889	7.261	297.219	129.272	15.803	122.997	0.15	2.957	9.264	3.123	0.15	30.056	5.673	270.108	90.263	1131.17	42.113	0.75	25.417	0.844	50.382	275.439	164.91	3.504	0	0	0	0	0	0.2
163001	39.156	340.69	75.517	43.84	8.223	0.25	0.337	43.27	91.095	25.628	142.56	0.396	18.186	2.05	78.771	72.123	4.315	66.558	0.115	1.783	3.158	0.471	0.15	13.696	4.012	77.163	40.146	287.375	8.476	0	8.167	0.15	19.075	75.847	39.382	0.814	0	0	0	0	0	0
164001	183.143	1641.3	350.033	393.352	50.778	0.65	0.6	168.915	411.034	174.326	593.941	1.554	66.48	13.762	365.749	176.813	15.738	381.326	1.085	9.154	16.447	3.177	0	65.988	14.513	314.285	146.752	1645.45	46.811	0.75	47.001	2.25	127.622	683.833	188.717	3.677	0	0	0	0	0	0
165001	314.594	1624.66	466.868	130.646	49.274	1.549	0.973	444.676	890.425	104.455	581.715	3.048	93.501	7.46	434.54	285.83	20.263	364.247	1.122	15.628	26.971	7.629	0.15	96.582	21.423	241.671	413.245	1650.13	19.411	2.7	76.264	3.215	84.281	250.276	218.021	3.159	0	0.589	0	0.475	0	0.463
166001	328.929	1525.17	509.69	70.339	55.294	3.192	1.808	389.573	859.072	73.895	482.995	18.732	73.723	6.825	378.943	288.478	21.209	380.826	0.978	9.28	21.868	8.088	0.543	101.173	16.946	201.708	352.861	1397.97	11.984	1.8	77.179	1.327	63.058	134.097	182.75	3.081	0	0.649	0.2	0.325	0.175	3.223
167001	348.104	1819.02	645.281	122.523	96.832	1.502	1.569	509.698	1023.6	90.745	685.776	11.927	112.253	7.133	637.249	534.18	23.069	475.349	0.6	10.838	34.806	12.694	0.621	140.154	21.615	305.037	399.221	2010.69	27.77	0.366	95.599	2.358	89.384	230.051	331.047	5.792	0.2	1.121	0.2	0.2	0.225	6.014
168001	246.324	1154.24	219.816	47.331	37.366	1.94	0.714	188.646	830.812	34.104	286.803	8.59	38.08	4.025	294.853	181.327	8.722	378.536	0.258	7.552	10.314	7.871	0.336	99.289	8.755	172.256	235.663	903.206	6.489	0.7	71.117	1.949	27.6	82.763	78.007	1.707	0.3	1.741	0.4	0.4	0.4	3.495
169001	134.684	785.206	107.346	61.077	24.17	0.613	1.832	136.134	331.941	32.838	140.539	1.4	24.795	8.897	117.165	61.295	6.193	157.866	1.842	16.575	4.761	2.926	0	31.303	4.32	97.646	115.413	717.344	9.463	2.359	43.215	0.807	33.029	101.394	92.606	0.923	0	0	0	0.3	0	0.005
170001	30.227	458.987	46.839	85.899	35.236	0.441	3.488	58.093	20.734	43.178	50.398	0.093	20.179	13.317	54.299	25.711	6.9	51.108	0.299	12.831	13.389	0.869	0	5.646	4.069	50.992	29.22	410.088	13.492	1.948	3.571	3.422	42.384	140.183	80.66	1.547	0	0	0	0	0	0.1
171001	42.611	372.193	111.009	35.804	57.891	2.013	1.451	95.363	72.292	60.471	126.602	22.675	26.915	5.471	94.673	60.257	17.615	56.729	0.339	10.292	7.899	1.833	1.5	23.459	4.238	61.163	50.774	266.647	5.052	1.365	11.118	1.647	22.147	61.156	62.065	1.342	0.9	1.957	0.4	1.1	2.15	17.413
172001	36.532	672.743	114.542	76.505	52.415	0.598	0	78.487	73.801	67.574	110.078	17.353	31.881	4.515	161.798	60.216	12.833	68.182	0.968	6.643	9.872	1.789	0.3	23.13	8.012	91.818	54.036	427.437	15.979	0.496	9.538	1.17	30.572	145.197	73.991	1.058	1	2.397	0.9	1	1.997	16.18
173001	37.993	677.219	69.048	204.711	24.651	0.45	0.876	72.277	74.863	106.867	87.255	3.431	44.493	5.196	139.719	35.042	13.005	32.555	0.643	10.861	9.297	1.058	0	27.772	4.769	169.335	48.515	499.784	36.212	0.632	7.995	1.011	49.065	223.629	90.423	0	0	1.045	0	0.399	0.753	1.707
174001	12.92	275.67	43.974	31.116	124.098	1.479	0.424	35.789	19.424	62.177	32.695	26.89	18.562	5.591	32.258	34.146	26.492	30.856	1.35	16.317	4.715	1.085	3.491	19.689	6.639	45.82	46.714	232.306	3.332	0.499	4.881	2.129	18.578	86.056	44.004	0.304	0.6	2.7	0	0	4.357	0.9
175001	16.014	1274.86	93.414	243.306	248.657	1.152	3.599	63.24	28.517	269.842	103.3	33.359	108.477	18.256	307.405	58.388	45.191	43.028	0.629	19.262	7.399	0.743	7.176	36.93	8.666	350.518	46.543	995.265	78.48	0.922	4.264	2.535	111.364	650.565	131.443	4.878	0	3.393	0	0	2.616	0.2
176001	15.428	1136.04	100.518	282.011	200.595	0.518	3.555	81.545	23.999	189.741	78.651	25.944	59.152	20.247	198.056	44.304	39.301	31.355	0.571	27.136	10.178	2.066	4.03	13.179	8.176	233.262	32.105	873.179	52.182	1.973	4.148	2.571	98.513	299.941	179.423	1.381	0.435	8.965	0	0	4.299	0.721
177001	76.686	1006.48	162.188	159.052	332.763	4.2	0.615	105.413	297.613	146.88	352.17	75.859	55.021	7.993	230.351	149.534	72.44	161.728	2.7	25.934	19.048	1.941	8.555	79.246	18.308	186.976	165.939	861.7	18.735	1.047	22.019	1.941	86.521	155.364	125.47	1.165	8.118	45.806	2.387	15.94	9.191	109.638
178001	42.507	811.116	111.323	247.395	122.632	0.339	1.725	94.29	126.644	92.372	133.903	18.123	45.477	11.273	161.466	64.321	25.996	73.288	2.278	19.264	15.879	2.214	3.745	35.052	12.949	125.144	67.721	705.789	41.369	0.728	13.182	2.269	79.861	351.635	113.11	1.419	2.817	26.439	0.913	2.958	2.933	21.357
179001	98.601	533.766	103.06	30.018	67.107	0.261	0	109.722	263.506	40.933	198.502	3.807	31.462	4.335	92.658	68.476	9.517	106.032	1.022	8.326	7.159	1.106	1.187	31.179	6.256	75.162	69.183	459.455	7.314	0	24.293	0.588	18.587	73.208	85.455	0	0.33	0.897	0	0	0.399	2.582
180001	50.896	907.502	114.76	158.975	87.555	2.1	2.806	121.862	114.572	88.419	165.522	8.242	59.347	10.625	232.631	63.524	14.058	83.446	0.916	6.687	10.709	2.572	1.813	23.994	8.335	219.997	56.444	594.052	32.547	1.2	16.958	2.179	55.496	308.555	104.063	2.75	0.2	0.842	0	0.2	0.401	3.95
181001	20.502	597.707	69.444	95.493	46.888	0.064	3.31	75.539	41.062	67.375	75.794	2.08	25.181	5.075	47.736	21.807	15.247	16.85	1.567	6.731	5.666	1.633	0	10.433	5.822	78.234	8.27	349.955	14.137	0.15	1.984	4.119	35.722	187.144	71.884	1.731	0	0.158	0	0	0	2.607
182001	18.516	307.641	43.926	72.606	40.902	0.086	1.385	60.051	38.5	60.917	62.681	1.489	26.525	3.302	65.808	22.168	5.732	30.548	0.217	7.566	5.779	0.917	0.6	7.362	3.024	47.225	23.066	334.581	17.21	1.2	3.66	1.052	24.087	168.427	76.888	1.219	0	0	0	0	0.291	0.624
183001	13.245	1543.61	127.802	248.442	96.381	0.184	1.799	98.398	25.758	126.514	88.18	8.468	67.588	10.934	282.702	42.983	21.961	42.05	0.6	8.329	23.56	1.514	0.3	27.515	8.857	236.892	34.385	658.791	90.376	0	9.649	1.214	114.757	637.559	203.515	1.687	0	0.253	0.2	0.1	0.009	2.087
184001	17.799	279.947	50.077	34.426	50.018	1.31	0.3	64.384	26.32	32.321	70.727	3.03	20.603	3.157	37.153	33.201	4.687	27.703	0.297	3.881	3.26	1.63	0	9.852	3.199	50.208	21.023	156.897	4.484	0.634	1.756	1.301	21.602	75.371	40.215	0.441	0	0.744	0	0.1	0.697	2.091
185001	15.443	442.992	73.185	89.313	26.826	0.75	1.291	68.173	27.894	47.863	47.105	0.45	20.494	3.906	37.983	17.846	5.939	16.822	0.466	19.9	12.105	1.373	0	7.535	7.102	80.051	11.575	262.455	10.065	1.35	4.035	0.63	39.646	132.905	75.94	0.272	0	0	0	0	0.3	0.241
186001	28.525	405.334	44.758	43.097	22.278	0.15	1.417	76.713	40.397	38.101	55.991	0	13.902	4.28	37.741	28.597	9.006	40.387	1.736	9.629	8.959	1.165	0	18.162	5.967	67.308	21.421	246.401	6.625	0.713	5.932	2.649	25.748	93.835	54.592	1.74	0	0.1	0	0.398	0	0.1
187001	22.077	350.899	47.271	49.228	27.635	0	1.324	71.437	37.035	23.275	61.361	0	17.013	2.727	34.727	25.24	4.773	52.424	0.192	10.457	10.695	1.959	0.583	16.336	3.872	48.322	27.973	265.661	9.304	1.869	6.786	2.64	22.931	91.438	74.757	1.707	0	0	0	0.2	0	0
188001	147.999	905.04	108.246	62.185	29.291	0.133	1.204	206.109	285.983	53.506	194.634	0.08	36.2	3.899	111.175	93.09	5.937	164.41	0.175	12.78	13.205	2.755	0.167	63.668	11.543	71.971	109.339	691.425	7.486	0.859	35.041	1.95	30.119	110.347	90.055	0.852	0	0	0.2	0.4	0	0
189001	60.257	651.546	111.831	81.399	29.267	0.315	2.101	117.45	129.318	73.633	103.526	0.52	20.893	15.868	83.211	39.614	13.192	49.876	1.373	23.015	13.908	2.64	0.149	19.866	5.464	167.647	47.896	669.378	25.836	6.393	17.205	4.852	47.502	175.635	244.476	0.622	0	0	0	0.1	0.098	0
190001	83.075	1545.75	158.586	389.724	68.796	0.266	1.705	99.606	100.737	218.167	242.876	1.051	81.459	10.847	321.279	72.477	20.71	145.455	1.036	6.444	5.937	1.379	0.3	27.798	3.655	289.688	67.913	1199.33	57.905	0.583	22.566	2.351	90.069	344.43	159.257	4.274	0	0	0	0	0	0
191001	158.791	2650.02	276.892	632.723	64.693	0.871	3.634	187.906	212.513	220.639	449.128	0.493	148.533	21.327	635.554	137.56	38.476	341.919	0.714	6.543	20.619	5.071	0.289	68.587	8.91	615.444	115.888	2173.33	126.724	2.117	33.858	3.233	197.383	738.517	357.222	4.927	0	0	0	0	0	0.256
192001	114.844	633.914	131.705	45.577	32.791	1.113	1.41	108.546	148.394	51.256	213.383	1.302	26.302	6.788	109.522	62.186	4.771	173.307	0	7.52	7.995	0.899	0.611	27.89	6.951	115.188	83.957	566.343	5.867	1.048	24.643	2.393	42.559	93.482	67.597	1.772	0	0	0	0	0	0.144
193001	28.391	615.55	65.23	68.015	13.821	0	2.69	59.598	49.155	50.893	47.866	0.3	21.394	2.377	90.576	17.376	8.449	35.589	0.286	8.782	8.729	0.738	0.093	12.396	6.828	75.892	18.143	315.99	30.919	2.016	4.65	3.132	40.495	144.099	76.639	2.093	0.2	0.205	0	0.201	0	0
194001	6.645	452.948	74.092	107.642	44.73	1.551	6.01	82.286	12.835	53.166	40.002	0.552	18.897	34.559	53.636	7.935	9.394	5.546	0.912	32.318	19.8	1.096	0.057	9.843	5.633	116.088	7.286	377.972	16.813	3.534	4.959	5.638	59.518	153.494	160.732	2.406	0.2	0.939	0	0.899	0	0.399
195001	17.44	708.148	57.894	121.491	93.347	1.149	0.206	89.202	22.383	75.664	76.657	2.975	42.747	5.294	164.554	33.047	18.692	20.825	0.962	9.886	11.668	0.714	0.6	16.504	4.895	124.876	34.645	389.406	23.524	0.3	5.076	1.656	45.935	218.165	79.763	2.434	0.2	1.454	0	0.2	0.661	0.999
196001	18.361	666.96	70.417	121.855	44.477	0.333	2.672	93.389	45.951	89.751	56.482	0.823	39.213	3.761	160.895	30.605	8.105	23.102	0.388	6.693	6.412	0	0	11.127	1.634	106.241	30.724	365.567	34.294	0	6.243	1.57	30.653	244.923	86.81	1.738	0	0.202	0	0	0.039	0
197001	42.638	2204.76	185.41	475.441	74.352	0.57	2.814	174.182	91.24	237.092	174.189	0.927	161.285	14.671	523.471	72.955	27.339	65.946	1.085	13.169	116.118	4.05	0	67.05	17.952	463.939	63.734	1347.07	159.485	0.557	18.117	6.466	218.865	862.232	245.132	3.773	0	0.2	0	0	0	0.2
198001	46.439	939.992	170.637	164.979	94.488	2.091	1.518	202.231	97.81	92.893	152.246	3.049	60.565	7.961	222.859	84.338	22.583	45.346	2.152	5.929	13.156	3.044	2.094	25.093	8.055	193.549	101.004	699.566	47.583	1.591	18.741	3.209	76.64	301.071	106.714	6.104	0	0	0	0	0.1	0.1
199001	37.864	556.844	142.277	78.925	52.958	2.702	1.994	173.835	75.512	56.553	107.47	2.542	24.628	10.567	95.526	60.572	24.959	29.036	1.008	20.286	17.759	1.306	0.818	22.587	5.701	99.518	88.902	355.246	12.668	1.593	14.004	3.238	54.669	170.223	130.956	2.947	0	0	0	0	0	0
200001	37.832	1050.55	155.618	211.887	68.879	0.914	3.26	140.919	58.791	111.505	133.187	1.869	62.257	14.994	211.108	54.256	23.109	37.033	1.144	14.492	13.69	2.777	0.384	24.077	6.622	185.984	73.988	703.948	51.455	0.907	11.367	3.559	86.845	368.626	150.461	4.364	0.4	0.402	0	0	0	0.3
201001	37.126	1201.48	152.681	363.101	104.879	3.387	1.372	147.529	55.342	152.143	181.504	2.622	100.289	17.097	333.618	88.237	25.812	32.336	0.608	27.491	29.735	1.273	0.598	34.078	13.655	246.852	83.68	916.308	49.471	2.497	17.364	3.478	162.348	555.749	179.953	5.175	0	0.198	0	0	0.174	0.2
202001	35.638	1719.59	195.341	373.593	86.951	1.567	2.954	194.425	74.059	162.729	169.246	4.722	109.699	16.87	395.609	83.048	36.378	40.5	0.75	10.057	17.061	2.39	0.3	37.897	12.006	322.662	80.688	1303.15	85.185	2.836	9.676	2.245	182.359	702.866	242.806	6.774	0	0	0	0.2	0.026	0.4
203001	56.092	1228.62	171.133	199.538	108.996	1.221	1.791	203.523	84.922	125.665	179.682	4.42	70.309	8.217	274.203	105.236	28.869	52.581	1.056	10.451	20.405	2.448	0.645	31.178	8.525	154.938	113.152	794.245	63.224	0.369	16.834	3.217	86.721	428.939	144.665	4.025	0	0.4	0	0	0	0.2
204001	40.049	2086.22	162.973	380.727	89.47	1.178	1.392	172.615	84.595	149.894	213.134	5.71	133.193	10.706	371.697	83.316	28.317	45.349	1.068	8.046	16.655	1.154	2.135	40.635	9.401	423.176	113.035	833.288	90.392	0.776	12.589	3.208	162.768	443.727	192.078	3.092	0	0.175	0	0	0.017	0.4
205001	17.427	624.202	85.871	122.834	47.984	0.583	0.94	80.731	39.115	70.649	69.683	1.225	26.942	4.457	105.073	50.227	12.928	17.888	0.639	4.748	6.723	1.204	0.217	16.068	3.849	129.898	34.28	380.506	25.26	1.196	6.151	1.06	36.205	207.005	82.709	1.713	0	0.225	0	0	0.483	0
206001	39.418	3977.53	308.132	975.638	102.68	1.04	4.026	238.828	46.215	359.312	188.791	4.028	239.686	27.827	874.047	91.798	54.808	35.534	1.442	8.328	49.108	2.782	0.436	61.154	10.248	852.447	70.4	2570.61	261.79	0.128	10.487	5.173	420.066	1652.45	532.656	10.567	0.1	1.805	0	0.2	0.993	0.2
207001	46.492	1425.71	166.909	319.11	84.179	1.36	2.353	157.986	80.968	194.452	152.864	3.985	90.02	12.286	261.503	73.971	22.414	43.456	1.195	6.647	7.629	1.272	1.814	27.225	6.058	254.587	101.662	994.128	54.834	1.35	20.129	2.947	96.465	431.514	162.716	5.17	0.3	4.395	0.2	0	0.607	0.8
208001	17.616	814.843	89.993	223.695	36.973	0	0.521	65.957	19.204	96.477	64.158	1.734	58.317	11.816	217.981	17.505	15.601	12.775	0.78	10.927	10.563	0.614	0	14.424	8.368	172.376	17.641	551.137	51.601	0.9	4.873	2.284	50.611	321.121	97.98	2.895	0	0	0	0	0	0
209001	14.431	344.929	39.244	37.074	51.999	0.6	2.027	62.927	39.431	27.22	62.176	2.141	17.956	5.645	32.26	24.871	6.453	36.252	0.42	9.481	5.397	0.586	0.15	9.842	2.261	36.817	29.697	241.79	5.026	0.75	4.877	1.166	22.109	70.68	46.876	0.57	0	0	0	0	0.454	0.2
210001	23.806	252.083	29.148	18.611	52.274	0.15	0.699	45.718	65.473	15.469	53.883	2.211	15.886	1.469	37.669	23.369	6.671	76.009	0.224	6.063	5.142	0.486	0.6	12.711	2.81	25.592	50.362	199.329	1.443	0.283	4.836	0.307	13.382	43.952	23.621	0.714	0	0.3	0	0	0.446	0.5
211001	27.924	659.916	66.045	74.336	134.508	0.3	0.552	87.484	115.667	52.946	94.132	2.319	29.396	4.745	113.171	57.967	7.889	42.119	0.446	7.323	5.282	1.614	0.75	21.321	4.71	86.804	61.944	481.917	16.137	0.167	11.98	1.793	44.411	182.099	69.166	1.495	0.1	0	0	0	0.3	0.1
212001	40.84	524.101	81.264	37.375	191.12	1.845	1.266	117.783	154.247	39.644	135.708	5.175	28.388	5.956	98.016	116.203	16.727	69.349	1.728	12.22	8.94	1.05	1.5	32.918	8.357	56.584	98.013	347.016	4.632	0.3	12.438	3.501	27.234	96.86	51.087	1.709	0	0.917	0.2	0	2.046	0.6
213001	45.442	926.116	125.83	129.283	260.5	4.365	2.411	150.247	119.19	101.744	150.86	3.969	58.101	12.776	238.078	99.585	27.257	42.484	2.206	16.159	17.07	2.7	0.6	30.098	8.109	146.692	97.287	646.487	27.337	1.509	19.606	2.94	53.816	216.83	128.542	3.732	0.731	2.849	0	0.462	3.095	4.129
214001	46.282	1814.68	192.631	279.657	140.412	1.952	8.21	185.188	69.643	132.293	141.695	3.607	82.663	33.119	361.369	52.133	29.539	22.841	2.638	39.189	43.8	4.228	2.247	53.491	13.164	214.609	65.491	1151.54	119.222	4.735	12.84	4.509	190.75	789.177	303.035	3.75	0.469	5.932	0.6	2.018	5.668	14.429
215001	100.819	1106.03	204.767	117.361	251.084	1.138	0.812	188.07	239.302	143.908	338.964	9.378	62.377	8.005	254.295	185.024	33.269	159.835	1.741	14.568	13.566	3.243	1.803	53.512	18.102	213.307	196.998	840.125	10.925	0.978	30.446	1.108	50.784	142.624	148.659	2.188	0.8	5.513	0.4	0.82	2.624	9.652
216001	98.558	1370.5	221.525	161.095	261.706	1.497	1.482	148.977	171.265	154.027	394.525	4.11	91.888	10.601	324.366	208.709	35.471	116.032	1.515	11.379	15.51	2.427	0.447	50.798	18.511	350.452	165.333	898.066	34.129	1.628	25.328	2.347	79.593	275.899	181.855	4.229	0.3	5.487	0.6	2	3.365	9.185
217001	58.888	1284.29	183.3	326.184	165.096	2.514	2.618	152.019	151.097	143.377	259.516	5.026	84.341	10.689	284.982	124.006	28.661	69.246	0.3	13.589	17.932	3.933	0.6	45.988	14.517	279.79	107.02	771.289	33.66	0.715	16.565	2.459	82.132	304.953	160.504	5.033	1.824	15.768	0.694	0.424	6.568	12.864
218001	103.447	779.718	105.624	86.401	24.108	0.336	1.894	80.382	473.544	48.993	141.418	0.524	27.873	3.904	106.487	172.845	7.621	135.312	0.3	8.795	4.536	2.363	0.3	47.979	5.066	106.967	132.057	479.679	4.563	0.785	32.261	1.136	23.846	73.46	35.746	0.819	0.176	2.132	0.206	0.076	0.432	1.536
219001	98.864	1196.75	88.326	195.421	29.008	0.193	0.634	88.455	335.245	99.762	140.337	0	44.107	4.532	202.621	98.7	6.449	196.748	0.45	4.035	3.525	1.672	0.3	41.31	8.636	168.601	123.749	825.947	21.61	0.623	16.281	0.45	60.022	271.116	59.955	1.697	0	0	0	0	0	0
220001	142.889	3133.35	320.59	664.322	66.957	2.131	2.974	206.974	257.419	301.901	450.686	1.075	178.201	18.768	654.122	156.316	26.007	260.326	0.709	10.567	35.414	3.11	0.528	61.249	19.438	640.999	122.667	2004.91	135.72	2.209	29.909	2.81	184.214	1019.88	302.229	5.768	0	0	0	0	0	0
221001	109.473	1829.39	233.87	407.473	58.972	1.12	2.518	165.367	191.5	206.905	358.784	0.425	95.478	15.344	372.982	158.872	26.006	204.985	0.641	5.45	19.113	2.259	0.072	41.724	10.062	383.235	122.581	1163.91	70.634	0.3	27.972	1.761	104.635	522.237	206.777	4.761	0	0	0	0	0	0
222001	83.446	1876.4	235.928	494.653	55.306	0.15	3.298	146.31	270.586	206.029	355.649	1.2	92.149	14.272	427.118	146.22	20.714	223.449	0.937	10.572	23.385	5.376	0.996	59.112	12.903	351.345	200.443	1516.78	86.661	0.897	26.976	2.675	136.799	570.939	244.91	4.09	0	0	0	0	0	0
223001	103.916	3016.67	255.002	611.803	97.472	2.918	2.937	161.618	338.152	279.868	477.056	0.3	141.48	19.407	669.258	269.814	32.336	322.36	1.913	5.498	18.233	4.71	1.752	73.078	8.865	590.449	222.869	1919.8	130.669	1.2	24.69	2.951	189.931	891.84	305.893	5.058	0	0	0	0	0	0
224001	134.421	1348.76	181.882	118.186	71.378	0.982	2.235	114.436	349.955	89.287	329.089	0.554	59.503	9.355	280.388	154.623	17.383	222.74	0.64	5.718	13.421	1.398	0.702	56.515	8.952	189.518	199.064	953.153	22.206	0.568	24.211	1.457	55.93	200.394	88.125	1.625	0	0	0	0	0	0
225001	800	3565.26	1111.81	165.195	153.979	3.485	1.47	684.633	1485.23	174.53	2115.3	2.492	206.005	8.427	896.865	809.63	44.184	1739.02	2.751	35.285	29.327	17.598	1.741	209.961	43.367	944.477	843.299	3367.86	21.629	0.243	198.681	4.709	173.302	266.272	434.768	24.643	0	0	0	0	0	0
226001	499.955	3284.53	806.717	322.941	149.128	1.765	1.431	324.403	1195.67	206.64	1233.78	2.354	154.499	11.191	726.381	418.971	26.298	1395.46	0.959	18.347	12.403	10.788	1.277	158.133	31.967	659.215	504.18	2601.97	70.677	0.689	110.114	3.271	183.118	475.02	298.04	9.407	0	0	0	0	0	0
227001	138.505	1845.32	133.588	263.043	70.377	0.9	1.766	152.09	189.879	167.161	335.215	0.297	79.477	11.255	299.421	77.756	16.964	183.483	0.801	6.434	7.918	1.341	1.182	40.534	6.621	316.238	64.949	1208.71	36.708	0.75	23.941	2.998	87.188	337.239	160.52	3.375	0	0	0	0	0	0
228001	344.038	3297.41	537.871	489.072	59.327	0	2.205	303.323	658.611	211.826	869.091	0.3	175.122	14.35	790.218	283.337	21.017	445.418	1.601	9.056	16.617	7.894	0.3	130.285	23.624	617.046	338.924	3032.34	115.807	1.22	90.474	2.641	217.642	767.29	356.115	5.247	0	0	0	0	0	0
229001	306.462	2739.51	787.776	497.487	78.251	0.6	1.611	408.229	705.581	222.663	1187.22	0.9	161.702	15.129	799.636	422.62	33.42	381.775	2.694	15.593	21.558	11.114	0.3	122.717	38.654	541.6	397.518	2477.45	89.193	1.212	82.076	4.775	192.644	618.928	344.232	11.273	0	0.2	0	0	0	0
230001	234.414	3119.95	1039.16	617.675	76.71	0.968	7.005	491.156	543.151	269.407	1114.82	0.318	207.702	16.162	984.129	439.852	33.039	318.984	1.251	23.441	38.623	12.682	0.114	141.862	48.662	596.893	282.591	2898.75	152.16	2.4	60.437	6.225	316.836	1128.06	431.472	14.015	0	0	0	0	0.2	0
231001	128.861	1045.88	466.888	132.554	71.629	0.232	2.073	365.877	240.876	84.265	545.483	1.182	71.352	25.774	327.175	144.818	17.628	123.873	3.734	25.532	34.123	9.248	1.28	64.396	25.593	185.264	119.63	972.973	47.156	4.79	36.761	5.232	66.977	255.062	272.137	4.761	0	0.4	0	2.4	0	0
232001	225.917	1479.67	618.876	178.038	66.6	0	3.356	562.573	441.358	98.056	753.475	0	139.097	9.718	465.499	285.352	21.861	242.691	1.551	20.923	25.424	7.82	0.256	86.421	34.011	324.919	237.42	1665.96	62.385	3.345	52.289	1.977	81.991	462.928	311.571	7.826	0	0	0	0.2	0	0
233001	466.566	3995.36	1299.69	594.654	97.235	0.6	3.308	767.753	980.454	261.136	1591.42	0.3	287.012	22.721	1259.8	544.722	37.978	575.427	2.205	22.26	54.286	11.905	0.6	204.035	56.534	880.209	546.597	3734.15	195.568	2.812	111.18	2.873	316.519	1101.42	515.862	12.451	0	0.1	0	0.2	0	0
234001	176.154	1443.47	252.764	191.452	108.354	0.411	1.857	236.617	427.41	118.509	436.777	1.852	62.497	12.096	377.127	158.339	19.981	191.987	0.532	11.004	12.099	3.292	0.441	51.868	10.054	302.936	165.147	1397.08	34.659	1.488	39.129	2.209	72.499	262.987	142.047	2.157	0	2.573	0	1.2	1.593	0.787
235001	21.014	658.186	75.323	117.818	94.803	0.776	0.693	76.335	42.023	61.152	94.123	2.604	44.679	5.64	157.133	50.868	12.852	33.762	0.481	3.087	9.951	0.418	0.75	22.47	5.873	143.12	36.057	382.408	27.275	0.128	7.515	1.368	39.164	195.628	77.268	1.803	0	0.685	0	0.883	1.307	1.513
236001	28.465	311.818	60.07	26.75	75.643	0.313	1.2	60.317	60.947	25.584	91.171	0.419	23.063	2.376	36.089	31.852	8.47	33.898	0.737	5.268	3.911	1.355	0.15	13.664	5.861	53.285	33.246	226.348	2.786	0.741	6.926	1.122	19.393	36.943	30.583	1.553	0	0.598	0	0.117	0.6	1.105
237001	19.081	325.453	38.654	42.967	54.533	0.314	0.75	38.955	20.76	17.727	60.487	0.066	13.178	3.202	30.834	15.31	5.009	23.092	0.313	4.775	4.123	1.771	0	12.439	4.069	48.168	13.221	179.684	2.596	1.25	6.828	1.355	20.647	60.371	42.058	0.951	0	0.635	0	0.474	0.3	0.195
238001	45.35	594.755	64.78	52.614	165.819	0.282	0.637	82.099	118.746	28.441	132.226	2.792	30.1	3.076	64.204	45.89	6.536	64.937	0.3	10.437	12.64	2.257	0.539	34.397	7.303	88.254	64.273	346.785	3.851	0.709	3.666	2.025	28.612	84.155	72.596	0.943	0.1	0.1	0	0.026	0	0.908
239001	49.653	553.539	121.613	48.1	173.008	1.2	1.313	90.533	150.42	53.595	212.433	7.257	43.312	3.716	75.553	74.576	14.349	60.559	0.9	12.546	15.943	3.017	1.111	39.975	7.711	87.166	96.276	587.413	5.624	0.3	4.956	2.996	50.734	111.601	75.653	0.6	0.1	0.6	0.1	0.2	0.7	2.992
240001	68.388	480.869	33.518	47.921	431.437	3.497	0.642	79.357	168.578	30.69	121.336	4.2	21.162	1.205	45.652	49.321	16.908	49.619	0.754	15.162	7.122	2.015	0.947	25.528	8.269	97.022	94.962	331.949	2.946	0.836	0.24	2.758	21.003	49.687	45.81	0	0.6	4.2	0	0.579	2.4	3.871
241001	17.025	110.195	59.576	50.098	298.75	0.553	1.158	38.181	42.369	12.747	29.501	3.968	14.573	3.745	21.766	23.481	18.906	14.379	0.845	10.805	7.561	0.385	9.283	11.883	2.568	59.813	9.245	125.649	2.314	0.232	2.894	0.842	18.297	1.586	18.4	1.5	0.2	1.5	0	0.248	2.292	1.627
242001	13.585	220.683	69.223	16.113	119.735	0.6	1.05	43.187	54.803	21.431	50.75	2.632	10.06	0.9	38.82	8.941	12.034	10.399	0.351	1.333	4.817	0.6	1.17	5.09	2.36	59.45	25.081	174.125	1.79	0.582	3.166	0.45	16.753	28.442	35.416	0	0.3	0.5	0	0.173	1.108	0.302
243001	10.131	53.672	38.3	4.65	3.871	0	1.05	20.326	17.582	7.803	12.604	0.627	5.654	1.396	18.892	4.2	6.322	2.25	0	2.372	0.9	0.168	1.789	1.748	1.253	11.41	5.25	62.364	2.745	0.574	6.705	1.105	5.517	15.307	11.71	0.15	0	0	0	0	0.4	0.051
244001	12.113	106.63	58.913	13.5	16.713	0.6	2.4	7.989	6.3	13.091	0.299	5.044	0.75	0.887	36.637	18.898	7.635	1.8	0.599	2.837	1.05	1.1	0.761	6.749	0.4	0	19.65	49.401	3.201	0.776	14.848	0.245	5.883	0	18.12	0	0.299	0	0	0.1	0.7	1.449
245001	8.796	22.335	68.445	0.75	2.536	0	0.6	4.657	1.95	8.047	0	1.078	0.733	0.714	27.716	0.9	4.098	0.15	0.3	4.062	0	0.832	0.6	1.316	0.386	0	1.65	32.036	3.46	0.6	6.904	0	5.85	0.22	4.754	0	0	0	0	0	0.2	0.798
246001	1129.38	3745.92	186.83	33.65	45.32	0.694	0	171.555	1375.5	45.135	842.739	2.483	194.952	2.654	792.428	308.218	15.498	1190.79	2.9	10.276	26.162	14.715	0	381.743	12.199	770.86	1227.17	2685.24	19.228	0.9	67.847	1.251	201.169	52.703	164.438	6.725	0	0.4	0	0	0.2	0.497
247001	2177.78	5984.33	259.131	140.431	51.26	1.772	0.6	602.075	2094.5	77.39	1616.42	5.457	785.223	4.096	1338.63	450.199	21.843	2061.24	2.543	26.851	82.703	36.594	0.15	889.469	41.203	1130.34	1940.27	4776.15	144.612	0.6	181.152	8.951	251.514	94.475	367.694	10.806	0	0	0	0.1	0.2	0.403
248001	74.235	491.842	80.073	16.165	18.437	0.084	0.3	78.723	45.796	29.599	160.925	1.355	20.047	0.909	55.846	65.156	1.625	108.111	0.257	4.15	5.56	1.189	0	57.428	3.821	38.762	165.832	654.225	2.101	0.3	5.148	1.047	15.058	18.035	27.064	0.203	0	0.103	0	0	0.1	0
249001	75.929	659.98	129.675	43.527	61.952	1.8	0.3	198.058	330.267	40.171	121.862	2.848	38.748	4.641	114.939	141.227	8.046	179.718	0.6	5.306	10.308	1.951	0.59	72.246	8.064	70.87	230.723	685.045	1.95	0.6	22.238	0	21.058	57.081	62.519	1.161	0	0.397	0	0	0	0.8
250001	33.752	327.205	53.289	21.788	17.665	0.45	0.529	90.034	141.42	15.815	99.087	1.35	20.22	2.724	38.846	85.94	3.82	71.97	0	2.938	3.395	1.2	0.31	31.72	4.088	35.387	89.792	280.493	1.855	0.75	15.909	0.341	9.364	40.035	30.243	0.311	0.019	0	0	0	0.042	0.835
251001	7.336	167.232	17.132	17.415	8.953	0	0.52	18.383	22.954	10.501	39.464	0	7.657	1.422	21.18	44.964	1.009	17.182	0	3.287	3.567	0	0	7.439	2.973	17.935	13.862	105.278	1.895	0	4.404	0.409	10.595	77.576	12.614	0.139	0.081	0.1	0	0	0.158	0.865
252001	9.351	361.952	56.386	51.489	21.842	0.3	1.95	62.534	35.862	42.583	101.48	0	20.467	9.78	83.86	41.44	6.006	19.73	1.05	7.069	5.984	0.6	0.3	16.454	4.659	58.941	40.279	255.849	14.227	0	4.878	1.333	22.723	111.98	43.191	0.231	0	0.7	0	0.1	0.3	1.459
253001	29.117	360.74	50.361	50.54	26.491	0.482	0.635	61.94	62.603	35.775	98.977	1.027	23.973	3.415	50.946	60.714	8.865	33.726	1.156	7.272	7.361	0.424	0.128	18.31	5.263	73.645	66.401	297.922	5.775	0.926	8.213	2.939	27.806	70.883	48.932	1.563	0	0.424	0.2	0.1	0.672	2.145
254001	58.164	1582.79	201.983	411.164	177.313	4.14	3.278	173.891	188.594	187.758	330.701	19.609	111.44	13.724	430.353	186.988	38.538	85.619	1.668	14.296	13.33	2.135	1.372	44.45	12.741	389.799	112.148	1397.24	67.857	1.172	14.441	2.137	121.854	455.108	243.803	3.718	0.6	4.035	0.2	0.5	3.607	5.353
255001	37.164	806.172	144.41	82.432	170.799	2.428	0.444	118.707	156.231	62.466	175.666	14.91	50.599	9.233	151.26	119.406	26.383	61.525	1.152	8.876	11.317	2.54	0.75	24.884	9.214	137.072	98.299	747.899	12.763	0.851	15.079	2.116	61.861	212.694	99.864	2.135	0	4.69	0.4	1.592	3.479	5.683
256001	29.68	1216.62	173.769	230.363	128.546	0.9	2.54	123.643	155.736	158.007	206.999	11.104	82.514	13.246	227.242	125.978	27.584	55.454	1.572	11.226	13.296	0.75	0.3	33.67	12.571	224.318	160.397	1100.74	29.566	0.955	11.985	3.32	86.856	359.371	150.458	3.75	0.4	7.651	0.2	1.008	2.241	7.156
257001	294.119	1329.07	698.338	217.899	324.112	7.5	1.65	531.598	1226.24	154.132	356.562	4.848	155.235	11.7	280.93	906.185	88.458	748.533	2.1	11.942	21.895	7.95	2.1	79.715	34.326	313.334	804.154	1422.07	17.376	0.444	45.105	2.7	73.048	132.702	148.375	6.6	0	0	0	0	0	0
258001	52.477	131.564	148.266	15.045	63.695	1.328	0.104	138.273	205.337	18.595	64.864	1.08	104.16	1.715	26.084	246.128	24.655	78.105	0.827	4.234	4.379	1.216	0.379	6.608	7.497	128.359	674.186	195.728	1.636	0	18.783	0	7.428	27.433	17.055	1.689	0	0	0	0	0	0
259001	376.323	2627.01	851.392	557.761	753.049	8.289	3.952	818.263	1283.26	319.72	540.152	8.182	224.905	23.199	504.6	1213.78	246.683	662.397	5.641	17.53	27.191	13.083	2.521	58.232	27.666	795.349	923.843	2355.57	99.418	1.394	26.768	4.321	269.784	674.62	377.401	12.849	0	0	0	0	0	0
260001	72.96	676.51	173.797	111.826	89.371	0.883	4.011	167.446	269.177	73.938	131.053	6.225	49.899	7.151	84.187	116.933	29.639	70.397	2.629	12.215	13.711	2.069	0.7	19.324	11.197	152.29	129.183	411.7	12.604	0.859	10.032	2.833	60.492	186.408	87.583	2.914	0.7	5.229	0.2	2.574	2.589	17.228
261001	23.275	1486.74	141.576	366.425	76.933	2.1	2.779	114.949	111.384	143.703	112.199	17.441	102.802	9.67	314.799	51.499	33.487	113.789	1.103	10.021	22.321	3.633	0.6	33.108	16.529	261.582	53.466	974.664	95.536	2.213	24.755	0.946	121.867	537.661	155.692	3.209	0.974	8.473	0.4	6.4	4.794	44.762
262001	23.814	512.01	109.976	62.725	71.305	1.326	0.104	65.452	124.212	40.785	71.042	22.544	40.234	8.203	89.1	51.01	19.775	97.259	0.814	7.282	11.04	2.371	0.9	30.052	8.889	71.951	50.506	263.818	8.293	0.634	21.91	1.8	62.525	114.181	78.465	0.789	2.026	4.751	0.3	2.871	2.562	24.644
263001	16.681	461.659	104.541	58.696	75.74	1.283	0.6	67.722	106.623	50.918	74.344	21.94	34.965	3.827	98.025	45.386	20.702	92.08	1.514	9.902	8.245	1.175	0.554	27.838	8.282	91.08	42.789	296.42	7.512	0.15	18.43	0.405	37.221	85.782	60.652	0.844	0.1	1.658	0.2	1.26	1.94	10.015
264001	113.411	836.339	205.611	60.263	105.246	3.689	0.15	163.974	266.78	75.103	218.143	19.535	44.17	2.881	164.109	121.882	25.946	203.524	1.272	10.9	11.809	3.9	1.867	47.229	10.768	113.179	135.836	687.341	10.266	0.595	24.861	0.865	39.331	110.218	97.881	3.034	0.1	0.289	0.2	0.295	0.912	5.042
265001	29.626	339.443	61.237	34.211	38.077	0	0.3	87.908	28.734	31.589	66.406	0.939	18.261	2.76	46.346	32.473	8.134	26.411	0.6	5.26	5.668	0.9	0.579	21.965	3.046	58.171	26.691	199.087	4.76	0.899	11.271	1.13	25.489	68.548	41.086	1.672	0	0.5	0	0.2	0.5	8.472
266001	11.979	244.748	34.213	18.482	17.84	0	0.9	63.047	17.509	14.35	40.506	0	10.508	3.578	30.755	19.358	1.822	14.913	0	5.919	1.836	0.45	0.15	14.93	3.592	38.856	16.168	127.231	5.837	0.306	2.915	0	16.609	48.028	38.621	0.299	0	0	0	0	0.2	0.628
267001	276.137	1743.63	307.515	102.927	107.572	1.874	1.359	512.152	657.755	76.48	531.455	5.075	114.198	6.001	211.662	243.755	16.23	489.118	1.351	22.539	16.457	5.433	0	126.188	24.593	356.714	338.568	1546.4	16.509	0.771	103.794	3.57	75.9	124.047	197.523	2.879	1.822	7.169	0.4	1.471	3.672	18.196
268001	416.719	3007.71	583.832	239.701	183.675	4.426	3.775	579.138	1016.54	185.758	655.589	14.405	176.403	16.888	456.655	422.833	31.888	670.438	2.249	16.961	19.857	11.115	0	184.955	24.51	601.034	482.481	2265.85	48.413	0.879	136.497	3.809	124.373	338.917	290.237	7.479	2.986	11.163	2.5	1.229	10.794	35.764
269001	16.085	393.863	44.936	64.489	53.152	0.436	1.766	44.785	36.568	33.129	51.781	4.609	21.223	2.311	69.403	32.915	8.583	24.282	0.6	10.106	12.087	1.139	0.424	12.902	6.6	57.361	43.831	231.712	18.823	0	3.726	0.644	29.278	126.792	57.941	1.042	0.492	2.605	0.783	0.365	4.826	16.2
270001	34.045	1629.41	115.218	297.461	130.553	0.314	2.024	132.633	30.315	143.895	120.7	1.898	86.324	14.843	352.22	75.124	29.724	42.914	1.35	6.519	16.023	5.094	0.39	32.391	8.329	350.62	57.562	1050.85	86.561	1.334	7.707	3.3	134.84	690.83	222.778	2.147	1.2	3.927	1.117	2.335	7.874	15.079
271001	35.229	1203.82	119.223	222.246	178.103	0.462	1.51	121.725	64.68	140.901	154.967	1.763	59.402	11.448	220.457	99.67	22.142	38.421	2.183	7.124	11.35	3.01	1.436	31.231	9.464	256.447	113.716	766.812	29.936	1.366	9.433	2.509	68.746	265.915	123.165	1.497	2.582	2.953	0.881	1.823	5.059	22.012
272001	12.666	301.567	39.322	41.87	66.663	0.593	0.666	61.582	18.018	28.16	61.108	1.349	22.398	7.608	63.055	31.527	8.77	17.125	0.259	5.193	8.803	1.403	0.15	18.374	7.301	64.554	32.257	195.062	12.815	1.5	2.373	0.863	30.109	117.192	48.047	1.156	0.9	1.997	1.219	0.977	4.104	19.91
273001	28.838	324.763	53.666	49.463	92.188	0.445	0.3	71.74	56.385	40.336	100.849	1.691	25.471	3.157	73.646	57.415	11.755	39.304	0.858	4.061	6.959	1.492	0.15	20.697	5.938	66.159	66.911	269.14	9.316	1.2	10.843	1.05	23.703	71.216	47.328	2.118	0.726	1.183	0.443	1.04	3.097	13.859
274001	32.97	613.695	79.515	64.727	113.325	0.15	0.75	99.036	67.72	52.139	102.868	5.509	21.192	5.082	81.163	61.357	15.938	47.188	1.35	13.71	13.296	3.112	0.3	22.557	9.706	82.739	77.029	364.172	6.91	1.186	7.856	3	50.151	132.257	77.349	1.407	1.292	1	0.657	1.36	4.072	17.415
275001	27.131	380.61	76.902	55.872	75.185	0	1.675	106.131	36.112	41.877	89.067	0.75	25.817	5.12	58.246	52.564	8.333	25.308	1.832	11.569	12.059	1.945	0.3	17.37	6.504	75.893	50.455	278.321	6.127	0.63	7.608	1.2	32.882	93.671	63.76	2.325	0.3	1.393	1.399	1.5	2.593	9.152
276001	23.924	542.138	76.027	84.562	105.303	1.2	3.725	99.489	42.994	62.544	92.846	2.669	31.426	7.416	118.204	67.873	10.809	32.053	1.534	11.766	13.808	4.036	0.3	22.226	13.598	85.303	67.285	417.811	13.219	1.531	8.201	2.627	43.647	118.984	102.024	3.3	0.3	1.321	0.6	0.9	1.721	8.995
277001	12.01	323.708	58.104	98.09	51.987	0.08	1.808	71.987	19.099	51.607	48.035	1.342	31.344	7.942	81.173	29.764	7.698	13.64	1.134	7.245	8.581	2.072	0.3	11.942	7.042	99.091	26.025	268.317	14.699	0.931	3.465	0.59	32.008	85.853	63.31	0.645	0.9	0.686	0.5	1.777	2.628	19.842
278001	21.824	430.224	114.244	68.468	40.135	0.82	2.541	193.939	45.411	67.803	86.548	0.639	29.514	14.095	69.961	21.736	15.646	18.22	0.676	16.037	15.605	1.925	0	17.7	7.93	93.384	29.895	258.169	12.111	3.324	9.774	4.843	46.238	87.798	75.993	1.755	0.3	0.7	0.1	0.423	1.789	10.306
279001	12.962	160.979	36.411	46.829	17.992	1.35	3.301	76.669	16.829	28.349	39.441	0.3	11.558	8.654	29.213	17.094	6.116	6.557	1.424	5.338	4.36	0.822	0	6.647	3.705	32.466	8.998	106.812	5.778	0.498	3.005	2.615	33.801	68.986	30.007	1.072	0.3	0	0.2	0.882	0.91	9.889
280001	26.301	266.346	74.833	39.461	45.277	0.54	0.271	109.143	41.827	47.586	93.714	0.15	21.196	5.954	61.923	54.066	6.617	14.188	1.251	6.807	5.948	1.436	0	20.869	7.215	46.24	35.15	252.412	3.278	0.413	5.467	1.079	26.278	73.669	42.618	1.137	0.3	1	0.14	0.064	0.824	8.92
281001	37.739	487.61	81.615	60.397	47.733	1.26	2.279	173.884	62.266	69.733	113.348	0.9	38.699	15.033	83.323	49.215	10.205	17.918	0.849	12.732	13.476	2.681	0	24.86	8.505	71.594	42.932	294.427	9.771	1.987	10.505	3.995	64.341	172.5	75.712	1.685	0.322	0.1	0.26	0.654	0.634	12.419
282001	129.85	553.439	158.463	24.771	45.573	0.9	0.238	122.832	202.92	35.695	285.391	1.224	30.521	5.529	120.68	82.061	11.848	156.231	0	8.967	8.979	3.249	0	34.924	6.098	106.328	119.289	688.937	9.592	0.9	21.081	0.973	33.977	79.092	70.076	0.948	0.178	0.3	0.219	0.2	0.313	6.117
283001	189.114	1174.72	273.898	118.813	51.607	0	1.112	185.734	285.474	83.067	406.657	2.349	83.581	6.004	263.238	100.543	10.531	285.23	0	12.787	17.255	7.077	0	53.757	10.92	238.238	137.629	1053.64	32.977	1.5	20.448	1.8	67.092	246.94	139.568	2.836	0	0	0.181	0.8	1.023	11.853
284001	85.299	401.209	124.669	42.164	38.389	0.9	0.465	103.516	161.808	77.488	198.959	1.348	33.005	3.816	84.446	69.431	36.071	96.213	1.2	12.197	10.854	2.932	3.941	30.506	8.481	81.519	87.943	529.034	7.65	0.75	12.786	1.727	47.02	81.563	66.594	2.194	0.328	1.054	0.3	0.7	1.904	9.932
285001	239.004	1082.92	475.279	58.303	856.511	4.35	1.035	220.688	654.995	194.63	632.612	9.329	144.974	5.935	424.308	288.066	102.464	199.078	7.649	24.168	47.006	2.575	6.258	154.513	21.845	676.025	319.138	1361.07	4.829	0.15	57.722	1.5	371.269	68.916	311.712	3.772	1.872	8.746	1.2	5.9	11.159	85.124
286001	284.596	1557.36	508.359	80.771	915.123	2.966	1.19	212.74	842.496	170.251	790.603	11.883	158.596	6.27	579.751	253.904	109.065	283.981	5.987	31.27	64.041	0.759	10.066	205.306	29.549	813.583	375.853	1595.59	4.216	0.199	46.724	1.65	425.631	82.382	352.509	2.999	3.218	16.965	2.783	10.21	20.707	132.404
287001	209.937	1121.62	307.92	102.638	217.054	2.317	4.055	212.553	454.999	181.257	534.912	3.387	114.29	13.195	396.134	124.964	101.587	165.023	6.291	27.754	75.658	4.388	9.173	139.857	27.441	564.05	185.362	1002.67	9.607	2.737	39.339	1.733	330.531	130.507	443.024	2.272	4.66	32.459	2.822	14.366	31.431	182.953
288001	357.021	1789.05	607.868	103.722	909.897	3.468	1.05	394.408	1092.25	171.454	981.113	16.119	222.427	9.153	833.239	343.395	168.43	336.827	8.528	38.189	88.732	5.853	9.589	238.387	40.766	1195.16	449.897	1711.1	14.285	1.694	91.778	1.064	562.436	132.744	629.039	4	4.201	50.494	4.062	12.789	30.005	189.813
289001	273.387	1395.16	466.992	64.646	533.921	1.445	2.607	230.854	894.942	91.853	717.381	13.736	116.883	4.421	538.386	289.977	60.323	258.843	5.933	24.619	59.783	3.375	7.145	163.465	27.177	601.931	372.135	1161.63	7.288	0.619	47.821	0.425	428.069	103.254	356.608	1.078	7.617	50.992	3.132	7.757	16.951	106.475
290001	22.674	371.564	56.2	46.283	46.247	0.09	2.206	58.697	46.686	35.345	78.313	1.806	16.823	6.281	54.922	44.11	10.314	26.702	1.149	7.055	7.004	1.194	0.605	17.865	4.914	40.37	57.242	246.036	6.666	0.15	7.228	1.698	37.168	66.142	49.014	0.3	1.5	1.451	0.6	2.419	2.003	22.58
291001	19.239	515.019	52.134	104.244	28.067	0.66	2.672	42.531	19.492	62.843	53.411	0.9	23.299	6.86	39.89	21.967	11.031	14.881	0.3	17.263	12.759	2.425	0.45	8.63	5.38	97.49	20.403	269.13	8.308	1.8	2.979	2.727	46.501	129.197	58.826	1.65	0.8	0.913	0	0.355	0.197	23.381
292001	3.847	123.887	38.099	30.749	16.443	0	4.649	34.122	2.459	26.365	15.749	0	7.649	10.644	19.499	2.196	8.533	2.974	0.15	5.628	4.05	0.75	0.3	2.1	1.29	30.298	1.8	44.184	7.2	0.9	1.05	2.1	18.576	56.85	32.975	0.749	0	0	0	0.3	0	0.2
293001	49.806	716.256	140.44	94.886	42.3	0.3	2.471	125.427	98.541	70.791	193.573	0	46.742	6.447	160.299	37.346	8.109	106.926	0.836	10.783	9.494	1.8	0.995	20.749	5.968	133.73	63.218	608.576	30.476	0.6	19.33	2.478	52.066	182.411	92.998	2.54	0	0	0	0	0.2	0.8
294001	70.246	1120.54	172.565	152.267	60.372	0.573	1.372	145.589	129.148	96.514	210.111	0.574	66.401	6.463	232.677	75.956	11.284	137.266	0.537	11.6	15.142	2.411	1.742	32.51	6.237	210.856	91.97	832.947	37.18	0.85	13.714	3.262	85.687	295.76	126.645	0.36	0	0	0	0	0	0.6
295001	47.658	1540.64	161.556	293.478	72.88	0.677	1.3	130.412	110.234	123.828	168.897	0.926	96.38	11.24	300.285	69.886	17.139	65.279	0.727	10.626	16.667	1.704	0.563	28.465	8.836	316.24	72.214	947.596	86.567	1.25	11.757	2.262	110.933	441.411	217.874	1.759	0	0	0	0.4	0.4	0.403
296001	50.036	875.576	156.515	165.786	55.374	0.951	2.231	156.287	103.992	106.931	160.379	1.862	53.469	8.859	158.799	72.904	14.36	54.746	0.207	13.431	12.671	4.557	0.3	23.627	8.716	201.846	80.186	597.28	15.266	0.823	10.375	1.596	57.297	215.999	121.28	1.512	0	0	0	0	0	0.697
297001	60.448	1280.81	181.81	213.719	52.65	0.499	3.781	139.437	120.678	131.269	174.363	0.838	65.23	9.052	237.592	88.139	16.602	64.136	0.993	7.925	9.123	3.618	0.105	25.532	8.763	302.496	87.011	855.23	40.56	0.398	11.807	2.148	70.112	327.413	148.127	2.944	0	0	0	0	0	0.653
298001	31.062	750.645	108.686	156.764	44.067	0.6	1.04	92.615	51.624	70.304	114.066	0.15	44.782	8.625	179.667	62.141	10.061	25.632	0.3	8.842	11.821	1.5	0.495	16.961	6.722	167.44	44.7	696.923	39.174	1.926	7.223	1.426	55.498	237.081	135.592	0.932	0	0	0	0	0	1.247
299001	27.577	423.018	88.78	74.355	31.131	0.6	2.965	105.501	46.065	56.279	96.622	0	30.398	11.296	112.561	37.067	16.519	27.903	0.374	4.58	12.238	0.714	0	15.731	5.804	107.865	45.737	300.075	11.959	0.729	6.362	3.7	37.662	97.937	46.409	2.139	0.076	0.1	0	0.2	0	0.503
300001	93.19	619.177	132.415	43.632	34.117	0.6	2.217	171.811	126.685	36.913	236.901	0	26.547	7.883	113.921	67.624	10.78	107.673	1.244	11.771	11.483	2.892	1.2	44.029	11.528	103.784	108.917	498.291	7.011	0.771	22.991	2.173	40.175	77.218	92.228	1.161	0.224	0.9	0	3.6	0.7	6.297
301001	65.206	458.845	89.763	39.279	18.64	0.3	0.773	109.893	126.97	42.43	120.318	1.318	29.109	6.547	65.839	61.127	4.873	86.594	0.594	6.443	7.896	1.827	0.3	26.297	7.687	85.955	75.72	408.166	3.728	1.05	24.629	0.9	34.192	60.128	65.631	0.9	0	1.199	0	1.999	0	1.314
302001	96.979	792.627	193.535	93.367	55.398	0.89	2.673	145.512	207.633	73.222	205.399	3.034	43.405	7.686	112.836	130.499	16.952	153.205	2.727	13.006	12.228	3.809	0	54.734	14.019	122.572	111.583	685.392	9.741	2.444	28.005	2.722	50.654	156.261	119.446	2.935	3.318	4.996	2.05	2.585	19.565	8.266
303001	1.635	62.525	14.514	8.591	5.828	0.057	0.12	9.392	5.06	6.834	11.249	0.69	2.651	0.785	6.277	5.77	1.064	3.546	0.008	1.365	1.667	0.201	0.034	4.462	0.618	7.486	11.696	54.467	1.068	0.16	1.056	0.496	5.048	16.996	13.622	0.392	1.474	3.094	1.7	0.624	9.847	4.691
304001	24.422	574.864	121.726	58.084	51.557	0.403	1.082	63.101	44.81	51.429	124.204	3.966	20.636	5.248	60.732	66.853	6.535	41.442	1.35	9.308	10.972	4.348	0.289	52.543	6.914	75.59	43.633	456.926	9.215	0.692	7.485	1.408	39.773	109.417	78.405	0.715	2.973	8.607	4.93	4.196	38.27	18.727
305001	104.952	623.018	130.861	28.634	35.818	0.249	0.703	104.64	180.179	33.569	175.067	1.18	22.397	4.019	91.545	71.29	8.509	152.067	0.6	9.98	9.145	1.178	0.38	36.466	4.888	71.178	91.905	514.818	5.331	1.064	25.316	1.635	25.045	49.268	54.862	0.75	0.964	0.4	0.014	0.33	0.7	0.635
306001	65.189	491.245	119.007	26.34	71.897	0.755	0.947	85.692	126.154	33.707	94.223	12.506	20.471	2.431	68.044	59.407	13.887	123.69	0.736	8.072	5.837	3.442	1.496	33.506	3.69	68.375	76.364	386.395	3.633	0.586	17.44	1.535	18.807	43.546	34.243	0.15	2.155	14.953	1.575	2.403	5.05	6.51
307001	25.115	475.572	156.457	120.137	494.607	3.046	1.8	87.129	82.558	95.201	126.894	55.98	20.739	5.88	126.732	144.01	55.86	71.339	2.114	15.731	9.749	3.182	6.051	52.43	10.497	85.053	197.725	502.071	2.656	0.6	10.789	1.5	40.221	86.049	121.276	0.9	5.899	38.444	2.825	9.241	27.571	35.752
308001	4203.11	4738.44	4315.75	303.159	1116.85	22.856	2.601	4134.98	4117.19	732.673	4593.19	26.808	1693.14	10.419	4124.12	2705.46	193.277	4445.3	21.99	246.812	260.228	105.362	4.713	1481.24	363.017	3551.25	2381.03	4732.1	168.929	0.635	1293.2	14.162	1315.1	321.006	2632.43	95.902	0.817	7.379	0.798	9.122	6.673	36.697
309001	4210.06	5994.83	3136.85	110.519	456.41	11.976	0.699	4046.14	4206.03	567.253	5101.83	10.388	1146.72	10.057	3191.25	1601.93	100.828	4275.36	12.744	159.378	179.8	73.92	4.081	1199.06	171.884	3235.87	1974.16	7513.22	93.429	1.165	1166.7	11.302	897.315	182.248	2189.77	55.624	2.667	10.177	0.2	30.271	7.582	41.705
310001	1647.88	3368.54	1324.7	78.433	109.606	2.049	5.419	1523.33	2139.91	177.325	2325.98	2.111	394.424	16.057	859.657	410.412	31.956	1072.2	3.104	46.04	58.33	15.062	0.646	310.368	40.994	968.752	699.923	3474.84	53.254	2.282	150.78	8.284	203.305	111.74	630.717	9.299	0.814	6.428	0.001	33.97	3.935	7.967
311001	2194.66	5297.75	3373.1	86.931	259.634	11.556	1.451	3119.71	2842.68	421.8	4909.87	7.964	709.279	6.275	1856.2	1162.77	78.832	2855.54	7.298	94.733	100.329	33.127	1.803	573.437	118.789	2112.32	1206.41	5755.25	113.262	0.859	354.226	7.01	424.672	155.52	883.945	28.136	0.4	0.2	0.199	0.303	0.482	0.2
312001	66.312	276.996	72.791	7.694	13.175	0	0.906	154.751	143.412	16.71	136.979	0.35	17.719	1.379	50.379	24.988	2.367	43.775	0.6	2.742	4.594	1.715	0.149	11.247	3.303	63.109	33.474	319.027	4.022	0.6	8.653	0.746	19.426	27.429	49.817	1.151	0	0.3	0	0.2	0	0.775
313001	32.161	566.766	81.913	50.093	63.233	0.818	1.644	116.053	73.573	62.219	76.173	0.946	26.498	10.013	77.793	72.835	8.393	47.395	0.6	9.378	9.543	2.377	0.296	19.788	5.572	94.578	58.396	289.078	5.868	0	3.852	2.743	38.39	122.16	56.107	3.524	0.2	1.5	0	0.8	0.053	5.253
314001	29.58	412.64	58.195	34.559	60.549	2.029	1.2	70.334	80.596	30.767	78.383	3.06	15.729	5.105	46.702	80.34	8.086	54.679	0.45	6.071	9.77	1.04	1.498	16	6.522	54.11	61.758	224.063	5.434	1.5	8.283	1.011	21.869	83.653	37.434	0.6	0	0.2	0	0.2	0.347	3.972
315001	22.05	205.65	24.15	13.8	44.097	0.3	0.15	46.054	49.05	12.75	29.401	1.65	5.25	0	25.95	51	3	40.5	0	2.401	2.85	0.9	0.3	12.15	1.65	28.35	36	136.909	1.5	0.15	4.35	0.6	9.75	22.65	21.602	0.3	0.3	0	0	0.3	0	1.9
316001	78.07	527.724	165.844	45.36	78.2	1.723	0.6	183.582	125.901	55.828	191.136	0.616	47.31	5.145	115.366	108.068	10.904	63.623	0.9	11.53	14.592	0.959	0.477	36.341	17.492	119.438	86.537	420.313	12.029	0.371	17.603	1.877	40.915	85.869	78.434	1.573	0	0.121	0	0.4	0.2	2.884
317001	63.185	1611.35	207.744	338.39	115.429	1.77	3.7	176.229	98.096	181.393	237.357	2.218	96.272	13.805	297.039	100.012	29.457	68.078	1.2	17.969	21.177	0.991	1.201	47.676	14.682	286.671	92.437	801.804	42.476	1.934	13.775	2.053	123.135	440.745	171.845	2.975	0	0.079	0	0	0	1.351
318001	81.073	1013.34	219.28	145.479	153.115	2.626	2.71	244.598	129.259	128.508	254.777	4.043	70.254	11.505	244.382	148.897	42.725	77.634	1.068	13.917	17.639	3.807	1.013	45.737	14.311	253.476	130.963	837.9	25.374	1.819	18.685	1.84	60.493	182.155	136.652	5.178	0	0	0	0.4	0	0.965
319001	2053.26	4971.17	2393.83	164.406	483.043	13.186	1.24	2187.3	2778.55	355.479	4222.35	10.385	713.682	21.686	1889.24	1198.35	103.391	2615.09	8.699	125.161	101.337	32.186	3.464	427.964	110.146	1908.63	1163.19	4954.97	87.851	1.341	358.899	5.539	393.735	177.753	961.05	31.315	0	0	0	0	0	0.8
320001	2302.48	4182.84	1988.97	74.669	226.203	5.193	0.3	1843.65	2961.48	196.751	3274.2	7.785	413.22	7.809	1462.34	1026.55	45.002	3197.87	4.723	58.696	49.663	21.098	2.604	516.78	55.829	1977.94	1274.19	4329.66	42.999	0.769	436.819	7.907	241.521	111.335	666.113	23.028	0	0	0	0	0.1	0
321001	2791.07	4623.57	2820.85	59.68	300.382	6.334	0	2779.29	3399.2	207.038	3663.69	9.186	592.453	5.532	1921.61	1284.05	55.958	3724.52	6.995	121.915	76.117	36.959	2.188	764.279	59.087	2200.01	1368.3	4404.81	71.314	0.816	503.55	12.208	273.708	98.234	494.198	23.384	0	0	0	0	0	0.2
322001	141.703	71.97	149.829	9.456	28.947	0.217	0	163.282	175.19	18.125	163.176	0.267	35.714	0.215	97.794	51.197	3.852	94.925	0.415	8.849	5.825	2.399	0.003	45.849	3.546	111.373	80.782	69.456	5.498	0	25.686	1.276	17.858	16.438	29.063	1.647	0	0	0	0	0	0
323001	31.476	842.994	64.511	169.335	59.576	2.235	0.084	98.891	92.632	102.441	132.699	2.118	48.345	7.332	177.095	86.097	16.678	46.453	0.9	2.75	5.527	2.821	2.354	22.562	4.327	166.292	110.232	537.951	17.283	0.3	15.818	0.735	52.558	197.399	87.408	2.732	0.1	0	0	0	0	0.3
324001	30.759	1067.59	65.28	210.16	45.557	0.764	0.966	113.345	67.402	114.358	104.737	2.082	52.448	9.748	229.576	64.626	14.819	35.33	0.9	4.448	7.33	2.428	3.944	17.643	5.273	166.64	62.523	573.182	29.341	1.05	10.282	2.563	52.141	240.823	98.227	4.918	0	0	0	0.1	0	0.4
325001	76.687	832.919	166.247	47.361	31.425	1.582	0.864	233.578	138.885	55.683	231.729	1.904	49.884	5.405	124.612	94.58	13.799	91.909	1.35	15.762	15.723	2.818	0.9	44.42	13.238	162.978	96.006	586.329	18.498	0.969	25.987	2.136	45.776	101.911	109.166	1.809	0	0	0	0.2	0.1	0.397
326001	48.48	686.643	112.675	52.345	41.932	0.861	0.621	128.373	69.433	40.6	182.411	2.933	35.16	6.164	95.689	67.697	9.347	74.275	0	12.681	14.949	1.831	0.3	35.862	8.318	138.015	53.119	441.104	19.11	1.88	14.999	1.762	42.069	92.456	125.455	1.768	0	1.16	0.4	0	0.5	10.716
327001	54.93	725.574	152.762	47.545	57.512	0.107	1.134	217.222	99.088	45.916	262.081	2.336	48.861	2.183	106.148	106.668	11.337	107.849	0.9	7.268	12.527	0.845	1.2	52.239	11.659	134.088	70.589	451.878	12.348	2.1	16.315	2.4	48.619	116.147	124.733	3.24	0.4	2.376	0	1.766	1.075	21.768
328001	33.311	447.987	85.795	51.034	52.211	0.3	1.581	137.028	58.063	39.876	190.202	1.536	27.242	4.936	68.849	68.324	11.512	44.263	0.45	8.655	13.383	0.739	0.6	28.959	7.244	92.021	46.963	275.797	7.157	2.343	14.501	0.719	40.043	92.554	95.615	1.121	0.4	0.264	0.053	0.434	0.432	11.531
329001	36.493	469.816	82.467	38.796	59.255	0.15	0.6	148.355	47.931	28.363	169.78	1.857	27.38	4.723	72.866	51.388	8.297	43.752	0.4	8.038	15.39	2.525	0	32.824	7.18	92.078	41.759	271.774	6.062	1.257	15.431	2.161	33.063	60.32	81.335	1.829	0	0.6	0.447	1.198	0.593	6.865
330001	30.199	380.837	64.784	15.446	50.057	0.3	0.9	114.98	61.138	20.287	132.965	2.862	20.703	2.012	53.49	53.123	7.802	45.506	0.65	2.377	6.401	1.891	0	26.526	6.931	72.249	55.699	253.097	2.767	0.15	9.855	0.57	22.163	34.785	53.119	0.282	0	0.1	0	0.425	0	10.992
331001	20.638	524.943	55.538	72.154	44.647	0.6	1.256	75.106	50.999	70.482	101.011	2.372	31.26	4.51	58.419	31.081	14.342	29.772	0.15	12.472	10.345	0.665	0.3	20.965	9.107	95.238	41.536	314.513	4.263	0.15	7.526	1.323	42.804	111.272	94.763	1.791	0	0.6	0.2	0.077	1.04	6.063
332001	11.986	468.348	47.535	65.43	67.229	0.3	1.395	51.752	21.623	57.572	63.024	5.008	22.932	3.882	62.149	26.067	14.512	14.664	0.6	14.068	8.624	1.135	0.261	16.684	5.32	70.578	43.758	246.074	5.63	1.713	3.362	1.527	37.735	112.753	57.987	2.229	0	0.2	0	0.935	0.414	5.946
333001	15.488	368.386	83.547	56.374	40.961	0.15	1.128	72.686	28.902	46.704	56.795	0.639	14.022	14.25	49.141	14.204	6.689	19.193	1.65	12.002	14.633	0.599	0.489	14.385	4.084	70.688	13.952	166.804	9.688	2.186	6.08	2.1	50.507	94.807	63.776	1.059	0	0.1	0	0.165	0.346	3.954
334001	117.526	845.393	269.61	44.447	37.053	1.947	1.076	174.769	139.056	54.401	218.083	1.963	40.352	4.512	93.122	80.184	14.745	134.098	0.75	14.983	16.484	1.534	0.6	38.246	6.643	143.665	84.157	426.426	6.035	0.772	31.784	0.529	48.882	65.399	104.591	2.015	0.2	0.4	0.2	0.1	0	3.066
335001	22.094	251.616	57.533	32.188	11.32	0.15	2.494	59.026	12.169	29.151	59.498	0.287	15.183	9.676	34.286	12.19	7.157	16.72	0.15	6.719	6.268	0.716	0.3	7.919	2.76	52.303	7.282	170.982	6.107	1.328	8.202	2.471	29.883	54.452	48.501	1.154	0.2	0	0	0.2	0.1	1.9
336001	71.228	682.739	191.344	85.63	22.634	1.499	2.699	174.07	279.984	64.491	284.793	2.399	43.489	9.291	165.562	67.777	14.541	47.987	4.35	10.494	23.992	3.747	0.45	50.241	17.398	147.559	14.83	1132.51	16.947	2.4	7.796	0.45	55.775	62.951	119.215	3.598	10.213	16.78	4.775	7.961	16.54	59.829
337001	22.14	89.068	45.542	10.141	4.163	0.45	0.542	28.319	45.796	8.986	86.717	1.05	7.797	0.299	20.941	20.097	1.996	8.492	0.9	0.947	4.35	0.15	0	6	3.3	22.141	37.29	243.587	0.3	0.45	1.649	0.6	22.335	10.784	23.386	0.3	11.765	9.925	4.979	11.4	16.939	56.49
338001	44.728	344.521	135.893	70.87	40.559	1.2	3.799	130.768	96.154	46.715	194.431	2.115	32.978	14.847	74.312	45.209	23.157	18.258	1.473	15.916	33.425	2.55	0.304	22.936	8.037	84.138	71.479	673.11	8.882	0.788	7.12	4.35	56.977	94.809	134.695	3.165	33.167	42.031	14.936	24.652	47.014	192.27
339001	95.798	528.069	243.952	78.717	63.793	1.809	2.722	178.27	212.955	76.842	394.544	3.906	68.013	16.743	142.018	119.016	18.919	58.836	5.357	23.244	48.839	1.909	0.664	40.639	13.881	170.01	168.775	1069.72	9.905	1.162	13.909	0.756	95.849	115.615	191.706	3.825	39.949	72.89	25.364	60.082	82.342	257.812
340001	127.719	747.836	349.775	117.762	51.531	0.59	1.337	268.907	411.572	82.552	498.478	3.423	72.105	17.007	191.718	166.518	27.769	98.762	4.268	24.091	40.435	4.991	2.032	51.924	24.581	201.75	233.797	1443.95	8.062	0.15	20.521	1.344	134.877	118.974	271.05	4.56	37.101	73.671	19.843	35.301	80.65	266.475
341001	20.96	275.485	32.855	32.501	20.508	0.805	0.779	39.459	46.563	31.411	45.805	11.356	16.133	2.11	53.861	23.453	4.912	31.124	0.81	3.478	3.807	0.42	0.543	8.898	1.951	38.99	28.304	192.022	4.323	0.9	6.352	0.835	17.648	60.762	40.226	0.272	0.1	0.296	0	0.3	0.479	0.8
342001	25.339	430.358	54.228	65.974	29.361	0.695	1.019	79.336	53.803	53.23	88.903	6.011	24.551	1.789	67.932	44.399	5.926	40.331	0.988	5.458	7.708	1.464	0.207	19.502	5.385	46.025	29.695	333.86	10.22	0.747	8.715	1.499	21.649	90.968	55.364	1.595	0.1	0.304	0	0	0.221	0.376
343001	354.848	1347.08	294.735	43.278	20.782	0.15	1.216	631.588	273.019	69.778	799.293	0.932	77.509	4.53	220.374	104.362	12.56	322.752	0.9	17.007	19.583	8.395	0.75	108.229	15.17	199.734	141.772	2271.45	8.377	0.75	112.218	2.791	83.988	71.521	239.183	1.282	0	0	0	0.2	0	1.224
344001	211.381	735.658	150.19	36.525	17.973	0	2.197	231.225	142.289	47.541	475.027	0.6	64.016	7.754	121.942	47.103	7.706	119.689	0.75	13.823	9.192	2.584	0.3	37.279	6.87	184.54	83.376	904.011	8.183	0.792	46.496	2.91	74.084	85.195	114.8	1.09	0.098	0	0	0.058	0.4	0.529
345001	95.344	597.584	147.382	48.529	22.88	0.3	3.065	192.397	42.42	51.543	311.405	0.034	36.927	7.673	76.424	21.187	9.985	63.942	0.3	13.878	10.613	2.516	0.3	26.235	7.757	109.939	25.722	492.302	11.791	1.758	19.269	2.914	45.503	83.069	147.55	0.709	0.002	0	0	3.119	0.1	1.693
346001	141.853	864.648	103.293	44.819	74.094	0.898	2.665	216.148	53.918	47.611	290.684	1.76	47.539	14.543	94.682	55.29	16.176	91.953	0.599	13.321	7.888	3.99	0.299	40.017	5.46	157.254	58.438	706.304	13.056	0.748	43.894	2.735	66.096	101.53	150.335	2.219	0.5	1.097	0	5.742	0.2	10.892
347001	110.022	797.264	224.841	32.819	24.186	0.6	1.5	375.013	105.347	48.478	413.78	0	74.512	2.228	131.893	94.258	8.262	168.163	0.6	9.512	17.244	3.429	0.15	63.218	8.539	151.561	67.477	773.287	8.08	0.9	32.104	1.76	52.739	77.945	117.086	4.38	0	0.1	0	0.18	0	1.685
348001	122.271	946.532	242.187	51.949	31.862	0	2.25	376.286	125.156	65.998	536.281	0.028	74.478	4.156	146.453	88.814	7.3	171.276	0.631	12.356	16.021	3.957	0.6	59.106	11.796	220.514	76.055	827.29	6.198	1.65	24.699	1.159	63.039	110.288	143.537	3.654	0	0.1	0.2	0.121	0	0.991
349001	94.18	657.714	186.664	40.001	12.088	0.15	1.5	267.345	104.793	44.252	378.549	0.572	60.221	6.194	127.898	84.136	11.3	135.622	0.719	7.744	14.429	5.043	0	47.844	11.154	150.886	52.797	544.299	7.902	0	24.801	1.241	52.311	71.962	117.763	2.496	0.6	1.2	0.1	0.279	0.2	1.109
350001	162.655	2302.63	229.418	349.933	189.827	1.671	3.75	230.464	291.834	195.086	586.666	4.05	155.273	17.121	475.147	189.989	37.394	390.455	2.362	10.964	18.242	2.082	1.5	84.558	14.031	503.441	168.853	1742.49	105.678	1.49	38.416	1.038	150.667	603.398	283.615	5.97	6.011	13.889	1.89	2.551	14.126	63.431
351001	88.497	1290.84	140.018	183.489	138.338	0.995	1.302	122.27	158.967	132.689	413.013	2.855	88.687	5.378	257.528	123.582	20.294	199.422	1.238	5.879	7.974	3.021	0	41.087	5.319	280.66	94.954	854.278	23.07	0.31	22.395	1.062	67.895	409.019	118.034	2.696	2.524	6.967	1.078	0.924	9.93	41.211
352001	78.836	1001.65	122.699	119.808	89.125	0.034	0.798	113.303	140.321	67.373	341.425	1.644	48.54	4.95	197.443	97.262	17.46	156.792	0.3	8.506	4.684	3.897	0.3	40.398	5.7	252.076	81.343	857.457	29.946	0.6	20.327	0.45	57.272	453.897	106.838	3.934	0.765	3.343	0.709	0.825	6.912	27.736
353001	21.118	558.204	36.206	63.578	12.049	0	0.15	43.19	34.638	38.746	78.349	0.6	30.996	2.659	86.349	20.432	6.849	40.33	0.15	1.384	1.209	0.939	0	13.73	0.253	120.441	15.882	289.805	13.806	0.45	7.221	0.562	39.115	209.521	46.51	1.712	0	0.327	0.322	0.117	0.33	0.72
354001	77.538	985.413	120.805	132.68	30.288	0.15	0.75	143.825	116.578	82.955	225.964	0.024	58.731	4.025	197.252	70.932	6.213	178.826	0	7.942	6.904	2.211	0	46.138	8.147	189.172	57.974	763.167	28.681	0.308	29.688	1.538	46.555	128.699	70.484	2.038	0	1.024	0.1	0.383	0.1	1.2
355001	29.773	477.937	49.907	61.448	18.456	0.17	1.861	96.844	45.37	44.064	96.362	0.293	31.531	12.943	96.552	25.73	6.457	33.952	0.75	7.132	9.943	2.039	0	16.045	2.004	88.152	23.943	380.485	23.506	0.469	6.203	1.667	26.709	104.168	51.283	0.982	0.2	1.003	0.1	0.399	0.1	2.501
356001	10.984	685.499	40.893	117.122	17.831	0.13	1.505	67.848	18.752	54.352	52.963	0.58	51.032	6.526	173.884	21.923	8.076	14.015	0.482	6.322	22.372	2.771	0	11.667	4.938	165.033	13.342	461.214	44.149	0.434	3.593	0.23	84.848	225.073	106.696	2.962	0	0.416	0	0.077	0	0.854
357001	17.255	1205.41	75.192	256.26	15.703	0.15	1.431	126.751	16.41	106.457	59.527	0.15	94.436	9.981	275.662	29.379	11.099	11.773	0.418	7.813	55.367	3.731	0.15	27.878	8.205	321.278	14.97	841.632	92.04	0.283	3.233	1.102	157.242	504.851	210.082	4.306	0.1	0.23	0	0.123	0.2	0.345
358001	0	0	0	0.232	0	0	0	0	0	0	0	0	0	0	0	0	0	0	0	0	0	0	0	0	0	0	0	0	0	0	0	0	0	0	0	0	0	0	0	0	0	0
359001	63.016	4683.48	324.898	1912.44	136.013	2.893	8.161	431.434	40.898	938.947	333.26	4.841	649.796	42.893	1235.91	166.417	75.201	29.78	2.549	15.288	172.011	15.106	1.498	174.78	28.195	2230.84	66.268	4129.49	322.427	1.696	11.983	4.161	764.805	3891.4	1072.7	27.058	0.2	5.832	0.6	0	2.099	3.098
360001	166.594	6505.36	902.101	2865.94	283.601	8.889	22.184	1458.84	69.647	1210.23	397.339	6.109	1511.25	113.626	2688.88	346.139	171.381	63.907	4.577	55.342	601.209	52.773	2.272	462.843	81.919	4853.57	101.006	5981.44	1153.51	3.632	23.152	12.136	1825.04	5457.36	2805.34	57.744	0.5	8.119	0.345	0	1.771	2.407
361001	160.495	6511.42	853.414	2408.86	212.027	5.384	20.467	1200.33	56.478	967.525	331.837	6.057	1235.1	106.517	2616.76	298.67	131.687	70.706	4.783	56.229	776.84	64.556	2.68	509.624	121.24	4215.33	74.104	5436.57	1087.87	2.922	15.236	7.853	1548.79	4826.79	2086.99	60.355	0.2	6.125	1.055	0.2	1.53	2.482
362001	45.238	4472.92	184.786	1052.99	107.363	3.67	5.924	475.785	40.793	663.418	211.507	3.288	384.129	44.229	821.981	141.328	66.052	26.378	1.141	22.699	61.315	4.362	0.896	89.733	19.661	2089.55	51.428	3351.11	201.097	1.938	11.071	3.902	499.024	1703.96	612.228	17.789	0	2.224	0	0	0.5	0.413
363001	149.142	5907.94	220.812	1642.87	91.814	3.302	14.499	928.169	38.996	719.39	232.299	1.709	784.344	72.828	1684.53	116.648	104.137	42.458	1.83	42.94	243.872	18.333	0.004	201.434	34.148	2533.05	42.059	3661.68	563.023	2.485	13.405	8.873	751.318	2710.1	1389.02	22.696	0	0	0	0	0	0
364001	118.909	5165.36	408.347	800.635	85.687	0.988	11.332	1052.25	21.987	365.144	138.856	0.779	976.225	50.408	1090.44	87.394	49.987	46.413	1.872	29.083	409.518	23.519	0.15	188.048	71.393	2154.91	22.41	2595.78	330.297	0.963	7.598	9.473	526.23	2487.45	775.323	40.061	0	0	0	0	0	0
365001	198.256	2000.32	134.731	197.262	9.513	0.074	2.837	363.476	10.393	105.789	48.76	0.318	299.272	20.556	344.72	33.451	15.257	14.155	0.928	8.528	124.99	6.706	0.186	68.014	13.285	558.717	6.727	451.769	64.733	0.983	2.44	2.752	95.327	552.528	153.826	11.345	0	0	0	0	0	0
366001	1606.58	5831.49	744.124	1347.24	82.897	0.798	18.245	3332.41	34.81	800.312	244.689	0.668	1376.91	81.639	2036.63	211.049	84.169	70.492	1.995	41.041	1062.67	212.331	0.114	554.38	135.7	3504.8	41.717	4429.5	851.771	2.384	13.027	17.921	1069.27	4291.73	1397.36	56.18	0	0	0	0	0.2	0.4
367001	332.196	1554.76	147.258	302.545	45.645	0.702	5.351	438.468	18.207	118.148	67.722	0.231	466.966	25.911	378.367	53.563	20.65	28.202	1.325	21.608	220.824	24.783	0	110.787	30.44	830.601	12.477	931.453	172.615	2.185	4.522	8.364	203.917	1148.51	312.028	28.338	0	0	0	0	0	0
368001	9.308	247.312	19.471	19.841	21.032	0.15	1.2	47.776	10.399	30.077	30.834	2.016	9.644	0.4	23.117	8.091	3.965	10.542	0.15	5.771	3.749	1.239	0	12.067	2.25	46.825	13.589	106.483	4.57	0	4.545	2.4	16.709	35.431	24.901	0.357	0.198	1.139	0.2	1.455	0.7	19.859
369001	55.188	621.636	98.346	74.146	36.795	0.874	0.396	129.077	139.82	72.218	140.717	2.653	42.176	4.789	120.156	67.937	8.172	68.312	0.773	6.615	7.644	2.661	0	24.742	10.951	120.381	50.796	429.848	13.051	0.857	19.034	0.313	34.007	117.127	76.957	2.05	0.073	0.861	0	0.639	0.182	14.807
370001	85.991	2023.96	182.654	382.255	70.821	0.926	3.204	229.25	183.512	241.212	287.719	6.408	151.33	7.415	419.004	126.54	19.092	115.902	1.027	8.511	10.534	4.671	0.6	47.361	10.697	479.329	93.128	1260.7	57.851	0.78	26.756	0.615	146.16	582.933	231.668	3.141	0.527	2.337	0.4	2.096	1.218	41.398
371001	24.823	317.688	49.073	45.016	13.583	0	1.64	66.894	26.176	24.865	59.34	0.278	18.782	6.462	39.161	11.886	3.497	24.734	0.746	11.649	7.602	1.017	0	31.997	1.536	68.654	7.408	240.81	3.295	2.057	4.864	1.584	32.528	68.675	48.358	1.774	0	0.061	0	0.164	0	0.432
372001	21.368	226.982	27.093	14.65	6.012	0	0.15	41.369	36.343	13.904	103.541	0.472	15.39	1.146	52.385	16.325	2.47	30.878	0.153	4.621	4.364	0.9	0.15	25.424	1.711	48.956	10.001	140.475	1.612	0.649	4.208	0.411	14.645	23.081	26.424	0.604	0	0	0	0.128	0	0
373001	2155.04	3141.28	1199.93	55.014	449.995	3.784	0.299	1456.74	2148.8	273.7	2752.67	6	369.212	5.182	2537.19	1178.4	94.644	2299.89	1.359	69.55	123.11	41.399	12.213	1643.28	76.526	2058.69	1857.95	2992.65	9.461	0.6	780.704	5.193	458.054	83.507	775.851	17.481	0	0.4	0	1.282	3.004	7.515
374001	2786.61	5426.06	4623.87	1653.82	271.357	21.602	5.827	5989.94	2829.26	2552.95	5133.62	5.847	2211.75	35.921	3740.73	1867.66	356.467	1889.1	10.22	518.418	1284.46	465.647	12.774	2616.1	463.249	3903.95	1934.35	5440.32	202.221	3.962	1114.34	67.715	2542.11	546.007	5090.04	336.471	0.5	7.544	0	504.036	15.688	42.978
375001	1888.69	4476.41	856.171	69.78	318.861	1.56	4.506	4053.13	1652.21	139.944	3457.67	0.743	481.376	7.735	1997.76	2009.59	113.048	1504.88	0.852	82.303	173.148	87.991	1.236	893.684	57.621	2187.06	1620.76	4616.3	23.711	0.679	588.901	50.099	439.774	98.747	1781.55	17.103	0.2	0.547	0	5.802	0.294	1.89
376001	2117.88	5003.95	712.598	354.1	388.119	0.342	1.937	1904.83	3513.47	241.891	3510.75	0.334	376.031	6.814	2078.97	2615.06	73.801	4318.97	0.149	53.539	52.169	59.86	0.15	1387.96	48.99	3435.83	1990.85	5496.97	57.948	0.956	454.985	4.017	320.825	442.354	1573.44	15.273	0	0	0	0	0	0
377001	3572.2	7205.62	2379.3	623.392	684.245	2.208	5.563	3539.56	4624.97	459.408	5438.27	0.536	833.303	23.156	3617.02	4009.02	146.895	6053.72	3.15	98.134	152.63	110.23	1.199	2051.25	125.943	5116.9	3071.29	7289.89	140.177	1.894	851.704	6.777	609.524	1168.36	2245.81	34.782	0	0	0	0	0	0
378001	1472.83	4301.98	400.548	44.406	259.034	1.65	0.45	2629.26	2392.13	99.89	2134.57	4.078	193.848	2.385	1665.99	1346.62	46.671	3211.49	1.35	52.035	40.42	106.821	4.668	1051.31	53.585	2016.99	1302.27	6194.19	9.377	0.6	502.285	7.647	151.581	75.834	522.901	6.327	0	0.2	0	0.2	0.498	0.9
379001	1066.27	2546.19	283.456	16.018	218.151	1.2	2.25	2827.87	1610.96	88.647	1063.75	3.019	215.084	4.65	1302.16	878.304	60.801	1834.99	0	59.755	48.76	68.954	2.555	542.364	33.508	1185.88	794.009	4853.55	55.775	0.15	325.034	19.627	100.894	273.972	670.612	10.156	0	0.2	0	0	1.2	0.514
380001	2476.36	2700.18	2003.29	165.264	1827.25	72	0.6	2045.49	2479.6	936.366	2668.86	33.275	1380.21	13.439	2701.04	2085.52	553.786	2709.73	13.65	75.741	86.944	197.021	32.815	1887.17	200.114	2437.2	2322.36	3995.72	4.65	1.343	1579.59	8.955	1348.05	102.228	1768.08	20.55	0	0	0	0	0	0.73
381001	110.519	496.03	138.667	36.583	21.931	1.125	1.308	262.644	131.218	42.605	228.979	0.638	25.306	11.461	90.381	80.55	11.116	57.298	0.429	13.157	16.301	13.652	0.486	42.354	8.514	53.365	90.443	518.595	4.623	1.2	20.835	3.12	36.878	69.098	102.796	1.8	0	0.248	0	0	0	0.099
382001	57.396	395.196	95.229	39.218	30.672	0.863	3.097	211.563	87.204	46.972	158.087	0.812	27.839	14.753	84.25	79.349	13.698	30.907	0.771	8.257	10.464	3.638	0.541	29.488	6.185	75.103	59.777	376.901	6.079	1.126	15.819	3.313	32.06	75.132	82.568	0.75	0	0.152	0	0	0	0.057
383001	96.332	646.572	118.221	35.083	36.041	0.262	0.845	344.057	171.833	40.804	281.022	2.3	34.496	5.647	129.125	182.813	8.335	94.217	0.6	11.066	11.2	4.838	1.673	46.774	7.855	124.233	137.414	643.857	8.52	0.374	33.198	1.667	34.71	80.319	76.89	1.8	0	0	0	0.1	0	0.1
384001	34.267	280.692	102.19	42.115	20.814	1.048	1.361	196.882	56.505	38.672	92.038	10.255	18.618	6.74	66.743	63.818	9.756	32.971	0.684	13.01	5.513	5.641	0	23.609	6.243	89.023	68.101	372.099	3.242	1.267	16.362	2.515	27.578	64.658	58.07	2.143	8.52	28.565	7.116	14.325	14.256	100.134
385001	26.702	450.161	121.479	79.258	45.198	1.435	2.837	132.825	60.216	81.086	106.126	3.653	33.264	11.705	81.612	46.576	14.696	35.381	0.768	9.915	15.401	3.755	0.981	21.723	6.87	128.56	47.232	318.008	9.531	1.122	17.148	1.326	45.672	160.833	70.606	1.121	5.636	20.331	5.36	13.456	13.748	109.5
386001	38.495	554.533	104.048	79.407	64.384	3.191	1.35	150.408	88.15	82.307	159.7	4.904	39.966	6.57	145.243	99.812	18.44	67.589	1.289	10.198	12.817	2.457	0.519	28.006	9.389	108.61	74.437	471.063	11.284	0.89	13.436	0.891	46.196	129.603	101.017	1.994	3.856	20.208	3.908	9.425	10.493	81.395
387001	79.517	697.265	190.659	73.557	88.679	1.674	0.733	292.4	178.956	73.16	229.06	14.044	48.609	7.517	156.612	207.289	25.18	134.939	2.239	11.329	13.462	4.938	0.45	46.312	16.279	143.976	129.324	644.456	7.967	0.468	27.729	1.108	38.047	83.71	94.564	1.64	4.749	16.444	3.6	8.916	11.953	107
388001	42.243	371.109	47.625	22.941	16.931	0.6	0.539	134.36	80.788	30.635	106.718	0.588	15.028	1.788	54.215	65.285	6.579	53.41	0.274	10.201	5.166	1.153	0	30.833	7.189	77.275	62.817	284.741	3.282	1.585	11.698	1.875	11.552	73.19	36.015	0.74	0.039	0.409	0.412	0.563	0.336	7.803
389001	9.519	164.965	10.579	14.491	5.673	0.029	1.284	32.452	9.002	7.838	27.289	0.3	5.085	4.016	21.02	12.32	3.5	6.489	0.483	7.302	5.075	0.599	0	8.386	2.771	27.011	5.533	87.641	4.425	1.61	1.236	1.357	6.306	70.824	16.443	0.036	0	0	0	0.1	0	0.987
390001	23.698	271.992	12.816	48.91	11.637	0.571	1.314	43.144	46.158	42.527	57.658	0	8.723	2.954	33.362	6.183	4.835	14.309	0.263	7.099	6.215	1.248	0.3	18.074	4.052	42.432	4.975	218.267	2.487	1.673	4.273	1.127	12.85	80.675	25.212	0.124	0	0	0	0	0.2	0.822
391001	69.117	697.049	60.625	26.141	12.941	0.3	0.475	206.108	175.869	35.992	189.787	0	24.303	2.481	93.247	62.159	6.824	109.681	0.283	8.203	6.029	3.553	0	52.312	6.507	63.703	58.105	551.744	2.887	0.082	23.944	0.432	15.193	52.562	42.594	0.596	0.1	0.188	0	0	0	0.478
392001	33.553	349.502	72.37	29.119	12.499	0.3	2.7	113.234	69.971	28.686	111.492	0.3	18.515	4.061	53.82	33.454	2.863	61.281	0.315	4.998	4.219	4.05	0	22.29	5.712	53.055	27.36	288.639	2.407	0.6	15.911	0.75	16.428	37.185	41.009	0.15	0	0.512	0.2	0	0	2.1
393001	40.456	477.117	91.974	31.635	14.863	0.897	0.952	150.128	77.552	31.734	113.448	0	23.649	4.749	61.633	53.263	9.057	64.981	0.15	5.064	8.144	1.375	0	26.285	6.167	80.216	40.191	328.803	3.688	0.3	15.192	0.646	22.499	93.601	64.032	3.45	0.2	0	0	0	0	5.558
394001	46.996	578.45	90.926	82.26	18.447	1.353	1.598	155.417	56.965	55.709	115.854	1.774	34.455	7.256	89.989	56.375	7.847	72.422	0.734	15.958	14.772	4.616	0	35.082	11.416	125.77	36.071	441.671	13.298	0.131	18.49	1.634	35.215	113.83	84.604	1.69	0.6	4.826	2.03	1.304	3.586	21.656
395001	52.948	1350.89	133.676	235.829	44.653	2.089	1.252	143.843	56.19	150.118	223.712	4.16	55.819	8.207	246.319	74.557	11.918	95.717	1.216	4.2	10.075	2.083	0	36.53	6.566	368.275	53.331	944.734	46.37	0.319	17.045	1.115	79.657	234.668	168.607	2.1	1.336	10.936	2.754	1.581	6.995	28.883
396001	82.528	1617.62	148.9	220.789	56.144	2.261	4.448	172.437	70.246	248.941	322.049	4.576	65.208	10.435	219.472	100.76	18.616	124.22	1.566	5.682	7.176	1.85	0	35.93	6.771	343.328	69.087	1050.61	17.786	0.451	26.877	1.105	85.887	322.493	142.423	4.274	4.094	12.012	2.616	5.458	13.269	38.92
397001	98.972	1048.6	151.616	100.167	40.013	0.75	1.05	210.432	90.318	87.78	284.489	4.94	55.722	12.986	223.348	92.796	9.231	197.442	1.284	13.94	12.425	2.965	0.3	45.21	8.5	239.51	78.03	892.093	26.616	0.863	29.977	3.548	46.903	119.788	106.389	4.369	4.47	17.615	2.6	4.657	9.846	39.216
398001	15.847	228.259	39.067	33.952	8.132	0.158	3.461	63.302	20.368	35.416	50.17	0.688	10.886	5.269	30.24	13.944	8.065	19.618	0.6	6.495	5.856	0.592	0	11.413	1.72	48.485	11.519	185.801	4.06	4.083	5.503	1.235	20.257	75.246	40.368	0.911	0	0.111	0	1.1	0.004	0.852
399001	23.702	360.704	42.893	25.05	8.774	0.822	1.488	86.253	70.659	27.948	72.867	0.431	21.797	4.142	38.688	36.62	4.699	39.413	0.15	4.964	6.433	0.768	0.15	15.828	3.182	88.962	27.729	249.918	2.373	0.592	11.5	0.9	21.17	119.238	59.07	3.014	0	0	0	0.2	0	2.074
400001	47.747	493.963	72.13	52.866	101.523	1.12	1.327	117.382	69.282	74.501	124.584	17.361	26.524	3.857	90.714	72.497	16.358	57.628	0.96	16.859	8.479	3.594	2.88	26.841	6.024	102.016	69.403	457.999	5.372	2.344	9.345	1.218	38.794	125.965	90.722	1.486	1	2.784	1.376	1.893	4.253	6.96
401001	33.978	431.825	68.294	50.228	64.77	1.5	1.926	91.278	78.34	84.504	83.003	18.073	21.313	7.468	74.011	42.226	9.788	43.348	2.862	12.392	6.277	2.256	1.388	17.753	8.113	93.745	54.387	387.685	3.15	0.514	8.559	0.749	31.491	88.602	69.186	0.855	1.301	3.204	0.67	2.464	6.964	5.273
402001	47.236	441.174	63.222	47.596	71.265	0.9	1.547	76.119	98.724	66.126	112.127	14.862	19.296	3.657	89.208	48.279	11.416	71.342	1.278	10.363	7.088	2.087	2.152	22.273	5.517	74.438	68.204	400.114	3.425	1.034	9.452	0.434	31.687	82.018	68.51	1.395	1.909	8.528	1.205	3.322	10.32	9.884
403001	28.438	217.119	40.493	51.868	21.656	0	1.758	67.571	44.797	30.119	72.473	3.482	11.376	3.969	43.83	21.748	6.554	26.956	0.6	15.037	7.233	0.614	0.683	13.135	2.401	69.27	29.792	278.811	6.71	0.77	5.979	2.349	22.376	47.588	51.946	0	0.39	3.983	0.149	0.721	3.762	2.769
404001	66.962	679.597	124.54	53.072	30.402	0.9	1.555	311.104	98.96	67.406	153.486	0.734	46.595	9.078	81.849	68.614	20.251	72.497	0.387	13.117	12.967	2.791	0.325	47.881	15.282	116.969	84.27	431.823	9.642	0.905	26.411	4.716	47.355	112.037	91.697	0.632	0	0.4	0.2	0.2	0	2.247
405001	80.559	821.097	144.402	76.729	35.672	0.896	1.637	374.985	99.651	109.114	216.27	3.81	50.475	5.639	124.553	104.399	18.028	81.627	0.511	14.094	13.574	5.907	1.394	56.342	14.467	181.247	90.094	710.445	22.737	1.191	27.31	3.11	43.717	122.828	141.902	1.991	0.2	0.426	0	0.4	0.4	3.251
406001	34.481	477.956	63.82	44.251	40.64	0.6	0.6	128.669	58.58	61.035	127.543	7.849	33.005	4.884	94.456	75.325	7.444	43.84	0.251	8.089	8.449	4.67	0.326	38.118	6.984	97.331	55.995	373.627	5.526	0.26	14.295	0.365	26.782	79.07	75.994	2.443	0.304	1.064	0	0.2	2.263	8.696
407001	25.206	684.993	69.9	86.665	48.245	0.6	2.1	117.051	59.832	84.216	124.506	7.177	43.907	5.972	117.521	56.209	12.421	45.406	1.525	13.849	13.254	3.644	0.514	30.257	11.667	130.745	46.659	393.604	14.007	0.944	7.73	1.175	43.154	173.044	119.05	2.01	0.496	2.209	0	0.8	2.178	9.243
408001	42.072	478.474	76.004	48.875	55.678	1.35	0.258	168.762	91.863	57.758	142.802	10.58	28.662	4.281	96.057	64.504	12.357	42.529	0.176	7.842	8.855	4.421	0.686	44.631	7.105	88.958	69.928	344.549	4.342	0.963	13.475	0.6	28.615	64.486	75.683	3.423	0.6	2.001	1.099	1	1.959	7.11
409001	22.097	316.024	41.399	47.693	10.732	1.35	1.336	93.062	43.78	42.676	73.098	0.3	16.228	2.273	30.734	23.435	5.709	21.254	0.3	13.404	6.974	1.815	0	18.534	5.26	57.683	18.124	221.01	2.869	1.095	4.21	1.715	16.842	70.789	43.37	0.367	0.2	0	0.101	0.2	0.1	1.4
410001	17.81	287.132	33.262	24.184	13.242	0.9	1.106	52.441	32.929	32.491	72.316	0	10.701	2.791	26.445	18.577	3.521	25.148	0.118	6.453	1.802	0.938	0	18.34	3.412	37.058	10.269	309.692	2.245	1.388	4.354	1.414	9.063	60.251	34.035	0.248	0	0	0	0	0.2	0.195
411001	14.371	320.999	31.778	33.698	12.891	0.6	0.9	50.552	18.082	26.426	72.702	0.051	14.024	3.313	31.054	19.779	2.704	12.662	0.332	7.034	6.264	1.57	0	13.857	4.473	42.148	10.741	194.348	2.102	0.697	5.167	1.606	22.521	72.009	44.038	1.635	0.1	0.2	0.2	0	0.1	0.839
412001	95.244	1324.06	380.388	92.811	53.252	0.878	0.3	365.286	397.664	93.49	670.369	3.813	86.651	4.787	436.706	119.675	9.862	92.22	21.221	16.423	24.394	5.846	0.03	181.399	42.79	247.845	130.752	892.996	16.981	1.53	24.385	2.889	230.491	110.055	134.174	1.807	4.46	15.307	4.185	23.967	25.992	284.71
413001	623.835	6329.24	2551	574.568	368.027	9.251	0.914	1964.62	3334.11	588.653	4695.59	18.669	506.841	8.016	3047.17	839.091	55.64	727.761	126.604	83.308	165.725	27.883	0.87	1110.75	259.512	1522.27	827.804	5887.9	67.07	0.323	135.899	16.453	1805.58	288.934	1161.62	22.62	49.448	144.363	41.385	233.885	206.647	2861.57
414001	413.093	4386.77	1072.76	474.419	133.811	5.637	1.126	1238.97	2090.09	430.732	2784.93	13.801	339.371	8.288	1768.3	460.987	41.077	397.272	99.543	40.611	100.47	15.954	0.75	686.595	142.629	1090.65	524.443	3394.24	41.084	0.3	86.095	9.683	1033.45	264.414	884.759	7.384	57.09	134.342	48.843	234.727	198.161	2495.34
415001	472.42	5188.86	1544.11	234.519	121.82	4.445	1.41	1177.03	2253.29	256.812	3322.12	13.985	284.597	10.958	2201.53	372.436	32.6	433.753	79.221	51.078	117.592	25.568	0.15	999.915	165.657	1073.62	739.281	3523.17	39.03	0.938	100.451	8.627	1056.45	181.869	873.186	7.003	96.717	214.149	71.454	372.722	362.765	2795.65
416001	737.9	6835.76	1713.32	218.08	99.641	3.754	3.98	1083.85	3624.76	239.724	4790.41	11.039	384.674	7.393	3143.91	479.493	42.024	632.822	54.473	71.546	129.19	29.8	2.699	1055.76	193.9	1832.51	868.416	5363.6	59.037	2.916	177.971	8.634	1532.4	308.294	1060.61	9.39	179.957	394.497	130.533	575.458	725.909	4018.41
417001	251.164	2860.74	630.336	118.957	121.569	1.847	12.659	346.052	850.164	127.531	1544.43	6.093	110.525	22.672	932.843	145.914	22.394	123.491	18.022	33.259	47.688	7.876	0.9	254.682	48.153	619.522	246.186	1648.83	21.412	2.405	77.816	9.664	326.704	119.536	467.439	3	135.915	326.67	92.983	317.869	521.044	2646.12
418001	32.502	476.527	56.786	35.461	22.518	0.249	2.547	120.243	89.688	34.401	98.905	0.601	21.792	1.383	52.697	29.19	4.069	55.775	0.75	8.519	6.352	1.492	0.15	20.039	4.888	71.593	46.631	323.089	6.552	1.691	12.258	1.699	23.964	76.153	75.854	0.675	0	0	0	0.488	0.2	0.97
419001	20.254	377.686	70.061	30.827	53.783	1.624	0.795	92.263	80.568	37.889	93.186	6.403	16.112	3.615	63.798	41.122	6.312	41.204	0.879	5.904	8.902	0.818	0.6	19.802	6.052	63.435	38.718	256.394	3.806	0.336	7.793	1.893	30.288	58.248	58.027	0.668	3.846	11.136	3.757	6.998	12.258	69.734
420001	31.608	647.914	106.986	72.078	82.915	1.514	1.502	130.277	107.288	72.76	110.088	11.682	25.554	4.104	92.234	49.388	7.814	56.611	1.521	8.993	12.244	4.334	1.5	27.601	6.416	93.722	57.315	391.685	7.085	0.839	7.453	0.991	39.106	133.945	87.189	1.94	7.279	17.322	5.476	9.239	16.312	121.026
421001	66.053	744.498	77.54	107.243	36.813	0.012	0.778	107.016	136.072	75.75	153.294	6.229	37.714	3.927	120.203	48.313	11.083	75.472	0	10.366	8.19	2.114	0	24.091	9.223	119.517	62.503	556.238	13.953	2.098	16.691	1.455	24.068	115.179	84.341	2.173	3.675	5.205	2.032	5.557	8.43	50.254
422001	40.954	389.813	48.232	64.25	24.178	0.6	2.475	105.488	40.537	15.924	189.149	0.127	38.542	5.517	48.33	54.847	8.376	42.573	0.227	20.868	5.752	4.417	0	21.492	6.797	84.369	49.61	294.382	6.242	1.913	15.057	2.155	24.301	47.167	52.299	0.086	0.4	0.735	0.035	0.4	0.1	3.884
423001	63.638	581.958	97.953	75.623	25.363	0.102	1.925	148.972	86.27	44.693	207.24	0.389	44.528	5.652	84.903	66.789	7.605	72.935	0.849	21.202	11.64	6.45	0.27	29.124	11.652	91.06	56.619	430.908	8.861	1.8	25.013	4.001	42.057	74.9	134.764	2.224	0	0.2	0	0.3	0	2.547
424001	40.572	362.796	63.923	30.157	14.426	0.048	0.594	99.297	91.022	22.807	70.7	0.661	17.205	2.793	47.424	56.667	4.251	52.575	0.582	7.56	4.937	1.844	0.18	21.969	5.395	61.082	20.921	253.708	1.973	0.386	8.016	1.288	18.379	51.837	45.245	0.768	0.2	0.2	0	0.021	0.361	1.176
425001	67.761	966.18	95.641	54.498	41.841	0	0.931	188.022	143.614	56.553	214.804	0.976	46.629	5.318	157.374	124.593	11.017	150.625	1.041	5.167	7.778	3.354	0.45	50.888	8.238	144.103	122.084	676.476	12.164	0.428	27.746	1.8	33.192	120.644	86.611	1.151	0.4	0.6	0.3	1.141	0.439	4.98
426001	68.283	735.856	176.973	52.632	55.796	1.846	0.216	263.663	111.331	57.914	229.867	1.246	41.622	3.188	120.779	169.706	15.967	82.457	0.6	14.113	8.692	3.504	0.3	49.088	11.456	117.253	103.649	501.086	3.697	0.628	22.177	1.2	45.575	104.32	112.53	3.055	0.2	0	0	0.038	0.3	4.619
427001	81.193	893.735	287.592	80.934	107.89	3.176	1.291	440.369	143.441	89.45	305.542	0.929	75.261	8.598	188.939	206.567	31.241	87.373	2.706	18.912	24.213	8.044	0.251	57.159	20.155	164.102	133.238	652.56	20.877	0.766	23.774	1.861	75.312	168.394	172.312	4.088	0	0.6	0	0.264	0.2	7.117
428001	55.206	1242.02	199.856	129.212	71.366	1.731	2.41	259.905	90.184	107.063	266.325	0.447	75.587	8.143	203.503	109.007	24.525	56.105	1.344	16.06	20.929	5.18	1.549	42.182	20.015	230.604	94.214	772.078	33.76	2.956	18.553	4.415	80.698	302.878	177.402	5.555	0	0.4	0	0.236	0	4.177
429001	79.018	2512	305.102	437.387	107.032	2.337	1.281	358.71	148.962	364.328	422.746	2.411	182.794	11.789	541.332	213.11	32.754	78.803	1.728	18.488	17.264	6.265	0.431	52.017	19.078	512.97	130.47	1719.82	112.962	1.2	22.778	2.662	166.647	775.587	233.24	9.656	0	0	0	0.3	0	3.817
430001	96.49	1185.78	256.71	136.013	101.124	2.495	2.019	386.37	179.609	122.865	354.848	1.637	87.652	6.881	258.182	199.484	32.013	89.089	0.672	17.505	25.176	9	0.769	69.732	20.254	166.412	156.295	876.545	27.558	1.574	30.148	3.439	66.435	226.821	172.271	5.975	0.1	0	0	0.4	0.2	6.311
431001	89.886	1565.63	252.889	214.486	109.61	1.27	2.245	262.192	187.609	209.743	294.523	1.161	135.6	19.473	388.823	199.268	25.281	79.281	1.32	19.813	21.935	4.243	0.45	57.972	12.446	343.967	149.598	1135.78	48.917	1.042	27.438	1.268	91.065	358.999	191.886	3.268	0.2	0	0	0.254	0.2	3.264
432001	27.318	223.513	47.474	14.538	17.03	0.105	1.359	98.278	18.122	41.585	48.848	0.225	19.828	2.484	51.214	40.036	4.679	27.156	0.249	5.685	5.557	0.42	0.15	15.368	6.571	55.378	29.036	224.451	2.847	0.304	5.81	0	18.999	61.869	36.402	0.351	0	0	0	0.046	0.1	1.086
433001	20.245	425.26	53.002	45.781	12.121	0.239	1.624	89.396	17.63	45.536	61.867	0.412	24.088	4.544	77.013	14.929	6.948	15.777	0.231	9.915	10.68	0.896	0.15	15.136	4.981	80.008	29.733	252.276	9.665	0.484	6.949	1.778	35.803	122.728	54.759	0.855	0	0	0.1	0	0.2	1.168
434001	12.024	315.334	29.773	50.621	12.267	0.15	0.599	69.284	16.618	37.6	32.241	0.15	14.122	1.806	32.945	19.348	6.621	12.33	1.244	11.406	5.149	1.054	0.3	8.612	4.798	26.382	17.551	182.423	5.327	1.256	4.793	1.075	16.479	48.706	33.84	0.766	0	0	0	0	0	0.532
435001	29.866	349.912	53.645	44.058	18.811	0.6	0.3	86.639	93.963	40.378	88.157	0.3	16.702	2.674	45.911	37.845	5.642	39.87	1.071	15.604	8.686	2.217	1.2	20.088	4.345	42.522	40.914	291.121	2.799	2.088	7.309	1.278	20.613	83.005	48.07	0.984	0.624	0	0	0.1	0	2.657
436001	128.284	1063.45	210.737	30.931	41.154	0	1.377	529.391	342.11	60.633	248.973	2.374	60.751	1.7	165.121	105.584	6.215	177.878	0.234	14.429	13.31	11.417	0	75.211	16.758	158.426	200.948	1037.21	9.153	0.3	55.46	2.018	29.136	78.193	118.044	1.974	0.476	1.349	0.413	1.96	0.697	19.726
437001	104.469	1017.48	245.051	38.924	56.776	0.6	1.516	451.7	242.855	58.937	301.132	3.946	66.756	5.023	187.512	100.199	14.228	163.225	0.3	15.601	15.615	11.651	1.058	88.499	15.915	150.793	143.731	787.529	10.379	0.75	42.432	2.705	47.243	94.42	151.39	2.266	1.25	3.878	2.616	8.538	8.036	65.394
438001	149.45	1079.85	338.983	45.171	63.922	0.15	0.761	645.521	287.534	94.295	388.357	4.693	86.661	8.045	249.996	142.122	13.231	124.609	1.289	23.445	26.241	10.122	0.442	88.758	24.019	188.643	212.547	1036.1	13.829	0.6	48.938	1.845	45.055	80.27	187.01	4.509	2.139	4.916	3.046	7.827	9.204	73.805
439001	255.168	1735.24	726.403	44.58	109.872	0.595	1.234	1155.2	511.867	146.888	770.006	5.022	184.49	9.114	486.193	344.372	26.162	261.629	2.476	24.14	37.127	16.735	1.668	162.049	48.43	355.172	337.265	1507.18	25.648	0	69.433	2.681	90.995	129.307	297.428	8.527	1.594	3.96	1.195	9.131	8.234	71.082
440001	342.429	2289.38	799.133	61.886	124.706	4.205	2.418	1423.64	563.572	159.979	710.48	8.576	173.618	7.74	494.686	435.462	27.023	343.736	2.867	27.183	57.297	28.601	1.478	191.002	48.924	397.967	421.784	2003.57	36.565	0.269	116.704	7.473	99.206	105.914	368.276	10.402	3.439	11.272	4.02	11.119	13.137	111.075
441001	96.116	736.579	217.336	57.733	69.294	0.63	1.091	359.052	217.263	70.254	292.152	2.569	70.06	5.43	188.058	163.198	15.544	96.359	0.485	14.043	21.775	6.535	1.354	74.843	22.617	154.768	156.814	565.71	12.766	1.231	32.021	1.796	55.358	133.708	109.737	5.112	3.407	6.349	1.164	6.441	8.817	71.16
442001	267.598	1844.22	696.6	49.743	118.965	4.414	1.713	1006.51	618.61	162.131	760.325	15.813	157.584	6.252	525.693	410.859	32.937	256.446	2.328	26.612	41.556	21.033	0.927	144.262	47.123	367.894	382.64	1559.79	31.444	0.45	90.606	2.627	104.151	135.475	314.208	5.992	4.048	12.025	4.431	11.563	17.09	123.823
443001	306.444	2130.53	757.521	61.71	171.195	5.085	0.387	1210.14	682.542	141.166	812.173	15.454	166.174	4.518	496.703	502.228	26.104	400.363	1.337	24.925	41.98	14.54	1.275	160.085	53.593	375.087	451.621	1735.2	22.566	0.122	100.928	2.77	101.349	87.895	300.751	8.448	8.221	18.64	3.768	15.925	26.235	157.045
444001	161.65	1388.23	346.874	67.432	77.013	1.913	4.194	540.892	414.795	70.78	401.589	7.395	76.3	6.066	259.247	198.119	10.918	250.995	0.764	24.605	27.151	14.098	0.879	87.456	11.813	234.742	203.231	1151.12	21.753	1.376	68.095	4.794	72.371	134.798	206.61	4.813	1.202	6.905	1.946	5.291	8.542	39.666
445001	17.967	322.997	70.064	42.603	86.429	3.971	0.472	50.927	61.484	48.314	80.772	3.591	14.894	1.608	44.095	95.527	43.331	29.149	0.746	10.425	6.587	0.869	3.066	11.715	4.07	39.615	93.972	310.36	4.365	0.254	8.744	0.75	15.083	65.68	37.692	0.3	0	1	0	0	0.1	0
446001	17.507	672.396	89.408	119.992	117.944	3.633	3.611	83.515	53.222	126.822	96.811	2.567	44.69	9.447	80.654	69.99	64.165	25.074	1.504	10.941	7.989	1.614	4.2	14.669	8.249	170.037	84.176	410.062	10.407	1.546	4.963	2.4	42.348	155.361	70.166	1.651	0	0.3	0	0.2	0	0.2
447001	35.126	488.056	96.65	35.804	156.401	7.076	2.51	109.947	139.367	78.894	119.817	15.666	21.047	2.25	87.766	183.25	42.439	72.309	1.19	17.088	6.01	1.375	4.8	29.278	5.757	73.716	125.197	470.496	4.247	0	10.953	0.239	25.888	87.539	79.769	0.449	0.352	1.818	0.149	0.911	2.283	2.345
448001	35.408	362.217	44.314	24.129	21.888	0.424	0.401	83.054	51.401	44.435	62.992	22.282	21.2	2.405	100.211	33.228	2.432	56.343	2.252	5.898	6.18	1.749	0	14.669	4.387	84.588	26.739	202.933	2.827	0.6	7.281	1.074	21.306	60.162	66.444	0.708	5.494	8.482	3.551	3.09	15.709	19.161
449001	41.147	1464.68	109.958	184.435	28.149	0	3.511	166.07	99.535	125.761	148.377	0.241	67.112	9.545	188.488	70.075	13.382	90.263	0.75	13.345	18.75	1.855	0.3	42.227	8.603	381.015	48.401	841.83	34.442	2.55	15.813	3.487	97.23	425.452	172.369	4.375	0.854	0.2	0	1.883	0.1	12.833
450001	9.095	295.807	46.826	46.358	19.247	0	2.225	52.761	20.972	29.356	26.11	0.28	15.526	5.444	25.454	10.73	6.7	12.208	0.821	9.803	12.468	0.567	0.278	9.015	4.348	62.407	6.799	158.956	6.6	1.525	1.173	1.2	31.121	109.113	64.546	0.149	0.2	0.2	0	2.871	0.2	16.958
451001	23.551	256.074	30.512	35.371	13.747	0.6	0.925	54.094	54.19	23.433	25.259	0.15	5.914	3.468	30.119	14.715	2.183	31.515	0.079	8.892	4.891	0.3	0.322	11.532	2.761	55.738	7.475	214.559	3.333	0.575	3.986	1.05	16.39	40.565	33.237	0.817	0.2	0	0	1.271	0.2	9.199
452001	28.98	413.457	58.131	47.423	17.546	0	0.9	87.391	53.42	52.389	46.358	0.724	17.284	5.549	38.849	26.514	6.615	30.117	0.6	8.68	5.897	1.8	0	15.533	5.586	83.303	7.114	247.458	4.578	0.6	2.213	1.5	21.996	79.524	41.908	0.993	0.2	0	0	2.251	0.293	12.941
453001	20.055	349.226	41.081	39.069	10.185	0	0.45	65.253	49.179	32.008	40.593	0.626	13.885	4.616	31.749	19.621	4.267	34.101	0.306	8.028	8.838	2.55	0	13.742	3.342	53.914	4.551	208.398	4.759	2.85	3.065	1.8	22.656	75.392	37.897	0.767	0.2	0	0	0.653	0.207	5.343
454001	21.733	965.844	70.058	119.15	12.602	0.457	1.375	84.123	43.552	101.962	54.254	0.3	39.582	9.962	131.363	35.328	12.532	25.867	1.644	6.705	12.555	2.684	0	16.172	4.993	251.694	7.306	594.333	13.94	0.383	4.177	1.5	70.561	270.585	105.271	4.847	0.2	0.2	0	0.967	0	4.868
455001	28.218	1930.91	102.107	293.475	14.295	0.443	2.546	142.628	55.25	133.354	67.857	0	135.97	13.069	438.725	43.536	16.368	42.368	0.3	12.906	21.019	1.499	0	22.228	7.226	538.872	6.691	1326.56	128.008	1.293	2.146	6.431	165.434	798.217	284.185	4.569	0	0.088	0	0.932	0	6.167
456001	85.255	519.454	68.938	28.846	10.678	0.3	0.879	84.383	174.507	40.255	100.777	0.3	21.646	1.407	59.819	29.506	5.06	92.222	0.6	6.69	6.06	1.056	0	20.789	6.558	97.083	16.176	405.987	6.808	0.7	17.67	1.437	17.789	88.139	44.065	1.205	0	0.512	0	0.868	0	2.977
457001	37.169	450.899	79.826	32.413	11.189	0.3	2.903	114.058	88.057	40.976	91.909	0	22.19	2.822	45.229	22.099	3.062	46.535	0.138	9.832	7.426	1.515	0.6	25.224	3.881	65.309	21.613	320.834	4.174	1.588	16.324	3.388	34.546	84.207	50.056	0.9	0	0	0	0	0	0.662
458001	32.929	435.91	91.425	22.11	10.143	0.754	0.547	162.259	122.962	39.225	92.06	0.6	19.898	4.329	56.022	35.782	4.48	45.632	0.762	9.537	9.468	2.493	0	20.668	6.221	59.972	29.479	300.653	5.747	0.867	11.032	1.04	21.385	65.611	46.713	1.048	0.121	0.2	0	0.3	0.2	0.854
459001	25.684	404.839	93.413	52.643	21.901	0.446	2.1	109.106	92.012	26.72	45.692	0.3	19.631	4.105	42.254	16.213	4.389	25.759	0.823	19.564	8.827	1.084	0	15.265	7.718	71.83	21.241	345.423	4.848	2.678	11.217	3.097	36.414	150.164	96.477	1.2	0.079	0	0	0.1	0	0.384
460001	21.039	549.222	123.478	89.449	50.935	0.6	6.413	183.701	39.664	56.725	93.716	0.15	23.441	20.726	60.737	39.152	12.278	20.239	0.975	26.918	30.787	2.593	0.576	15.781	8.104	100.176	32.949	508.751	27.624	2.819	11.575	3.996	82.614	197.158	181.796	2.308	0	0.2	0	2.779	0.1	0.5
461001	27.461	551.099	95.643	60.45	40.476	0.3	1.439	162.586	107.958	55.865	161.394	0.963	27.723	9.1	61.936	34.906	8.798	50.417	0.3	19.535	14.241	4.13	0.174	29.438	9.163	82.752	51.701	387.058	11.707	2.261	16.763	1.806	43.78	127.585	94.413	1.078	0.2	0.7	0	2.42	0.2	10.752
462001	35.151	397.078	79.986	22.25	16.532	0.3	2.173	122.149	92.466	28.15	85.281	0.681	18.352	1.908	47.402	63.839	3.755	67.584	0	5.371	6.268	2.069	0.805	20.281	2.733	38.907	37.714	277.64	4.727	0.15	11.751	0.857	11.956	71.444	30.229	1.417	0	0	0	0.8	0	1.604
463001	16.999	363.918	84.7	35.507	21.28	0.75	1.356	97.944	25.136	58.262	79.944	0.3	24.421	12.219	50.807	43.673	10.555	30.105	1.384	8.595	9.849	3.167	0.824	13.672	2.403	61.813	13.236	224.03	10.971	0.6	7.775	3.463	27.824	135.164	44.392	1.572	0	0	0	0.4	0.2	2.173
464001	31.497	525.219	107.275	28.392	25.937	1.564	3.888	181.59	44.621	47.438	124.445	0.6	28.378	10.791	69.852	39.809	13.645	47.923	1.466	16.527	16.373	2.299	1.622	26.83	6.591	87.213	42.492	432.786	15.528	3.836	11.58	2.91	47.83	171.466	110.52	0.584	0.1	0	0	0.83	0	1.485
465001	21.803	442.93	93.47	41.151	22.713	0.478	4.197	144.849	28.382	47.176	73.436	0.45	19.696	13.151	55.836	27.719	11.076	19.462	0	13.3	11.353	1.249	0.195	19.114	8.391	90.784	39.182	255.035	9.215	2.455	8.403	3.861	50.127	157.768	85.387	1.069	0.1	0	0	0.77	0	0.98
466001	7.581	133.312	12.129	21.997	8.962	0.508	3.422	41.01	15.973	11.634	30.165	0	20.403	3.359	14.716	3.034	12.677	5.787	0.171	5.954	5.561	0.848	0	3.715	3.322	74.548	6.548	88.517	9.318	1.462	6.175	1.539	34.954	19.118	71.109	1.562	0	0	0	0	0.2	0.2
467001	13.632	516.751	103.006	86.334	62.605	1.8	5.854	141.402	12.971	68.213	68.432	0.6	27.563	21.53	66.441	29.977	19.226	8.322	1.71	18.23	23.768	0.965	0	15.225	4.622	91.798	22.603	254.007	26.509	1.238	4.298	4.552	68.499	215.384	152.797	0.891	0	0.2	0	0.4	0	1.1
468001	13.918	399.228	59.916	37.437	28.421	1.05	1.25	110.22	43.267	56.905	61.774	0	25.834	7.146	53.479	20.03	10.308	11.502	0.069	6.42	11.163	2.335	0.3	10.625	5.923	65.729	20.04	203.147	8.483	0	6.129	0.75	39.178	126.818	60.447	0.451	0	0	0	0.4	0	2.958
469001	43.786	546.031	69.375	100.65	32.699	0	3.832	147.162	32.215	57.121	96.015	0.6	38.243	11.186	67.673	26.454	11.684	20.827	0.9	22.621	16.886	2.391	0.6	12.145	7.089	111.003	41.361	300.925	10.787	2.348	8.974	3.483	72.343	220.207	126.012	1.958	0	0.3	0	0.5	0.195	3.042
470001	23.497	1251.38	102.844	204.49	49.458	0.55	0.874	143.059	70.541	113.347	141.963	0.9	94.398	8.609	229.339	37.254	9.44	35.052	0.6	10.821	14.915	2.003	0.371	22.917	6.665	294.747	41.353	777.265	57.228	1.124	9.067	2.472	100.049	294.09	149.62	1.608	0.041	1.1	0	1.344	0.505	8.301
471001	45.399	1088.2	136.647	131.509	82.672	0.65	1.877	163.645	130.387	141.558	254.313	2.21	83.116	9.298	213.247	65.377	19.056	59.921	1.5	8.706	14.866	2.873	1.129	34.524	8.46	276.365	65.403	743.427	22.461	0.587	16.153	1.397	62.672	234.852	102.623	2.291	0.459	0.5	0.5	4.319	1.102	18.081
472001	53.147	648.26	125.943	73.563	61.555	0.419	6.45	194.117	121.578	71.957	194.292	1.261	38.909	12.525	85.235	43.748	12.555	84.134	1.198	22.546	16.467	3.168	0.598	46.22	9.972	169.865	84.517	499.2	17.883	2.436	19.571	2.697	83.142	178.07	145.587	0.9	0.681	3.238	1.119	7.718	1.236	28.967
473001	18.808	292.334	61.336	41.72	29.205	1.228	1.939	84.392	47.394	35.441	74.105	1.281	18.821	9.277	33.642	21.981	8.519	14.713	0.3	9.652	7.768	0.746	0.162	11.375	3.096	51.487	21.418	147.85	2.762	1.108	5.461	1.253	23.987	96.285	47.34	1.286	0.359	1.141	1.181	4.39	1.057	16.298
474001	14.811	476.081	94.606	74.84	46.037	0.3	6.818	120.229	29.381	78.823	102.582	1.248	29.858	19.736	52.37	16.475	17.492	14.003	1.5	20.332	15.314	1.1	0.912	14.799	10.903	112.96	23.52	206.538	7.606	3.251	6.67	2.799	62.549	173.379	74.394	2.148	1.122	2.337	0.3	8.408	3.034	35.91
475001	9.641	218.38	52.446	31.486	27.396	0.15	4.472	45.642	19.376	40.567	41.833	1.2	16.495	15.327	20.796	10.668	9.935	5.897	1.227	8.346	10.224	0.829	0.372	6.54	2.671	65.428	11.264	97.441	6.789	0.54	5.384	3.098	33.619	89.798	61.117	0.68	0.638	1.722	1.289	6.239	1.698	20.482
476001	11.069	248.572	69.666	46.753	37.619	0.617	3.647	67.6	12.409	44.8	57.312	0.75	21.89	11.629	32.325	10.459	14.302	4.9	0.518	8.163	7.881	1.682	0.054	7.565	4.087	76.509	19.289	115.929	6.055	1.35	5.252	2.317	46.889	126.702	62.466	1.358	1.137	4.404	0.855	8.75	4.547	41.275
477001	18.318	509.514	81.837	79.761	58.312	0.283	3.671	86.758	28.246	76.42	105.23	0.377	33.458	10.997	70.22	22.456	19.351	19.629	1.705	15.293	20.214	3.087	0.891	18.491	8.674	92.158	34.991	261.255	11.456	1.553	8.292	1.764	67.644	174.113	100.902	3.793	2.875	6.803	1.009	13.521	6.537	44.903
478001	18.131	301.059	58.694	56.21	34.568	0.3	1.2	59.877	24.182	56.81	91.539	2.141	18.575	5.371	31.972	11.771	10.288	11.054	0.6	9.263	12.849	1.619	0	14.827	6.406	59.713	19.138	144.537	5.716	0.871	7.9	0.613	35.46	84.629	53.013	0.938	2.988	5.664	2.047	8.609	6.488	34.082
479001	1510.41	4814.03	638.409	61.071	40.796	0	1.79	830.979	2078.45	140.77	2542.22	0.33	368.222	9.665	973.88	332.051	12.485	2489.8	4.094	47.373	46.149	12.619	0.213	465.727	26.635	1272.02	660.054	4211.64	39.014	2.071	219.714	6.316	168.013	170.893	450.362	13.873	0.197	0.685	0	0.397	0	1.165
480001	2364.75	6402.78	1123.69	108.501	47.661	0.352	1.507	2296.41	3828.49	216.829	3370.45	0.835	535.076	11.921	1560.21	948.695	20.325	3824.72	4.441	92.425	69.624	30.339	0.438	808.763	64.728	2360.35	1193.38	5414.94	51.423	3.263	621.339	12.829	245.265	217.747	891.187	18.176	0	0	0	0	0	0
481001	1308.6	5245.27	380.649	31.056	31.686	0.373	0.851	669.84	2095.51	109.769	1761.85	2.165	190.224	3.272	772.145	416.081	10.344	1959.66	3.478	30.741	16.355	11.358	0.099	352.133	19.589	1223.93	561.682	4867.51	14.02	1.986	462.846	4.829	101.802	89.906	362.932	7.237	0	0	0	0	0	0
482001	533.145	2704.12	258.282	48.954	30.002	0.211	2.126	308.912	737.634	64.275	806.391	0.75	69.753	6.481	304.837	92.376	6.244	915.078	0.887	22.546	13.97	5.495	0.3	158.615	8.21	489.946	204.698	2242.53	10.046	0.718	129.458	1.906	60.516	114.466	157.323	3.609	0	0	0	0	0	0.169
483001	43.864	511.688	107.96	57.44	117.742	1.461	2.413	174.589	57.376	56.87	110.941	1.58	28.524	7.601	76.32	36.544	11.161	48.069	0.898	24.538	9.668	0.968	0.598	25.299	7.964	115.403	42.095	363.687	7.612	1.828	10.973	0.966	37.197	89.342	75.935	1.049	0	0	0	0	0	0.211
484001	37.601	534.566	131.597	48.405	102.839	0.3	3.552	185.242	60.24	71.194	137.504	6.367	34.334	7.775	76.459	46.413	17.119	50.158	0.3	12.732	9.68	4.888	0	25.215	4.573	88.636	43.23	385.428	5.582	0.9	12.825	2.093	43.832	114.711	84.094	1.485	0	0	0	0	0.261	0.22
485001	41.156	638.147	135.445	138.679	51.272	0.3	8.448	223.059	72.931	131.726	153.579	1.023	37.204	26.338	93.246	34.31	19.174	42.24	0.3	25.058	23.147	3.591	0.45	30.028	9.219	153.53	33.01	525.41	20.909	3.696	12.068	6.682	80.214	202.897	180.056	5.266	0.2	0.033	0	0	0.674	0.6
486001	70.663	722.127	134.825	46.507	75.626	0	1.558	202.207	186.808	53.37	201.759	9.014	27.826	4.466	100.223	63.039	12.442	114.588	0.712	10.33	8.928	3.364	1.2	36.197	5.755	85.484	73.114	582.943	5.08	1.254	23.543	1.726	26.417	78.786	79.757	1.349	0	0.167	0	0	0.265	0.2
487001	39.827	449.481	66.908	50.034	83.918	0.655	0.569	92.349	53.961	64.352	104.603	5.93	20.772	7.345	54.878	25.166	12.001	42.01	0.802	8.601	11.067	1.925	1.085	18.368	8.166	82.998	32.104	328.736	6.13	0.787	6.863	2.028	37.658	103.649	63.86	0.6	0	0	0	0	0.2	0
488001	34.164	473.569	72.515	35.451	62.365	0.714	2.256	82.412	59.331	57.139	84.45	3.683	18.711	5.162	53.881	25.211	12.652	44.17	0.286	10.644	9.224	2.261	1.915	15.8	4.9	72.383	27.378	299.952	5.058	2.023	10.388	0.538	23.233	99.114	58.02	0.15	0	0.2	0	0.2	0.519	0.8
489001	28.768	393.859	80.434	55.718	30.252	0.731	8.972	109.11	46.765	83.405	83.672	1.403	19.969	12.35	50.667	40.115	20.783	39.145	0.45	6.709	8.952	1.826	0.9	18.435	7.789	86.597	27.106	241.614	9.4	1.99	9.976	2.727	41.238	114.003	49.159	0.9	0	0	0	0.2	0.694	0.5
490001	23.174	361.657	52.779	62.098	37.008	0.015	2.375	83.828	36.758	60.336	72.716	4.724	15.785	8.86	40.969	24.717	12.567	25.428	0.324	18.179	8.77	1.764	2.251	17.828	4.103	70.733	27.266	231.083	7.317	0	6.602	1.482	34.253	105.228	63.385	1.332	0.2	0.9	0	0	0.861	0.4
491001	88.294	971.233	145.994	50.777	34.344	1.987	3.02	130.645	138.325	55.385	219.631	18.655	40.125	7.06	110.259	61.75	21.126	51.669	1.881	15.292	16.378	4.6	2.771	55.093	17.776	125.075	133.637	468.234	8.346	1.2	17.424	3.972	80.859	92.694	106.486	1.178	4.374	22.133	2.535	2.177	7.988	28.295
492001	187.102	2085.48	318.736	173.632	70.349	4.869	0.3	171.257	295.968	199.577	496.405	30.314	138.941	7.865	397.481	211.22	35.758	141.261	2.876	24.574	25.673	4.691	2.376	127.27	41.163	400.485	331.512	1572.86	27.593	0.3	22.797	1.395	196.578	221.197	195.486	1.69	6.426	34.667	4.474	5.647	17.276	54.405
493001	65.519	561.949	102.589	26.75	11.103	1.979	0.6	63.776	101.853	38.368	177.173	7.905	34.09	3.324	82.348	69.645	10.722	39.211	0.318	10.681	13.121	1.058	1.152	43.176	12.708	98.614	112.382	351.216	5.435	0.15	8.126	0.905	63.605	57.202	60.795	0.45	0.247	4.374	4.245	5.572	10.12	4.4
494001	2.278	38.289	5.226	3.017	0.761	0	0	3.259	4.932	3.72	9.543	0.292	1.746	0.164	5.717	1.602	0.643	1.839	0	0.381	0.174	0.288	0	2.749	0.598	6.438	3.955	21.845	0.338	0	0.441	0.084	3.896	2.3	4.786	0	0.342	1.984	1.946	3.825	10.996	2.85
495001	21.571	194.846	36.466	14.233	4.789	0.45	0.15	23.781	35.263	23.727	68.748	3.308	11.015	0.436	34.555	20.744	3.857	13.174	0.15	2.469	3.276	0.762	0.3	11.951	5.852	41.284	45.838	171.478	1.612	0.45	3.309	0.066	27.9	20.05	21.614	0	0.509	3.842	0.6	0.977	3.246	9.25
