# Supplementary material for: Data mining reveals tissue-specific expression and host lineage-associated forms of Apis mellifera filamentous virus
Source: PeerJ. 2023 Nov 14;11:e16455. doi: 10.7717/peerj.16455 (PMC10655722; doi:10.7717/peerj.16455)
Supplement: Supplemental Information 21 — All samples are inferred from metadata to be female adult workers, although the number of individuals represented in each BioSample is not explicitly known. [file peerj-11-16455-s021.xlsx]

## Sheet: AmFV ratios
Supplemental File S10: The ratio of kmers assigned to Apis mellifera filamentous virus (AmFV) and host in 78 sequence read archive (SRA) accessions for which tissue category could be inferred from BioSample metadata or BioProject summaries. All samples are inferred from metadata to be female adult workers, although the number of individuals represented in each BioSample is not explicitly known.
Accession	BioProject	Tissue	Apis mellifera kmer counts	AmFV kmer counts			GLM binomial model of AmFV kmer proportion, weighted by total kmer counts:
SRR3033251	PRJNA306498	abdomen	5914	67932			Df	Deviance	AIC	LRT	Pr(>Chi)
SRR7770435	PRJNA488619	abdomen	7148	33331			53125	53657
SRR12659848	PRJNA663557	abdomen	2494	5740			tissue	1	53138	53667	13	0.0003255
SRR7770433	PRJNA488619	abdomen	1951	2305			BioProject	27	332921	333398	279796	< 0.00000000000000022
SRR7770432	PRJNA488619	abdomen	7293	7468
SRR7770436	PRJNA488619	abdomen	1710	576
SRR806508	PRJNA194157	abdomen	7986	1690
SRR801844	PRJNA194157	abdomen	7891	1313
SRR5136458	PRJNA359486	abdomen	8236	1251
SRR1255152	PRJNA243651	abdomen	6824	749
SRR14690758	PRJNA733472	abdomen	5391	502
SRR6047316	PRJNA407316	abdomen	8618	776
SRR806709	PRJNA194157	abdomen	8531	535
SRR806711	PRJNA194157	abdomen	8533	511
SRR802538	PRJNA194157	abdomen	8121	439
SRR1255546	PRJNA243651	abdomen	6891	133
SRR3033259	PRJNA306498	abdomen	7415	92
SRR1255153	PRJNA243651	abdomen	7232	47
SRR7770430	PRJNA488619	abdomen	2191	12
SRR10343222	PRJNA579390	abdomen	9802	25
SRR12780028	PRJNA667676	abdomen	9783	22
SRR13517984	PRJNA694473	abdomen	9835	22
SRR13517983	PRJNA694473	abdomen	12345	27
SRR12780027	PRJNA667676	abdomen	12264	24
SRR10343221	PRJNA579390	abdomen	12274	24
SRR6880286	PRJNA442330	abdomen	5581	10
SRR13361458	PRJNA689223	abdomen	7202	12
SRR10901290	PRJNA601517	abdomen	8725	10
SRR10901289	PRJNA601517	abdomen	13214	15
SRR10598663	PRJNA593999	head	639	3898
SRR10598633	PRJNA593999	head	557	2241
SRR14887996	PRJNA740269	head	6583	1272
SRR9007944	PRJNA541004	head	4430	747
SRR10598638	PRJNA593999	head	641	39
SRR8567940	PRJNA521949	head	3095	147
SRR9007931	PRJNA541004	head	5828	259
SRR12424206	PRJNA656275	head	9449	357
SRR12424205	PRJNA656275	head	9555	337
SRR8567942	PRJNA521949	head	3911	133
SRR14887970	PRJNA740269	head	6597	209
SRR14887977	PRJNA740269	head	7346	184
SRR9007934	PRJNA541004	head	4863	83
SRR9007939	PRJNA541004	head	5293	80
SRR14887973	PRJNA740269	head	6827	96
SRR8567900	PRJNA521949	head	1131	13
SRR446002	PRJNA104931	head	4915	52
SRR9312728	PRJNA549281	head	9198	92
SRR7513060	PRJNA480381	head	4247	38
SRR14887971	PRJNA740269	head	6672	53
SRR14887965	PRJNA740269	head	6039	34
SRR9312729	PRJNA549281	head	7139	39
SRR15990885	PRJNA764848	head	3528	17
SRR13361461	PRJNA689223	head	11691	55
SRR15990883	PRJNA764848	head	3602	15
SRR15990871	PRJNA764848	head	3275	12
SRR8769537	PRJNA521949	head	5411	19
SRR15990880	PRJNA764848	head	5708	20
SRR15990892	PRJNA764848	head	5854	20
SRR17818550	PRJNA801850	head	6150	21
SRR9007929	PRJNA541004	head	5078	17
SRR14887980	PRJNA740269	head	6385	17
SRR9020424	PRJNA541333	head	8378	22
SRR7513061	PRJNA480381	head	5467	14
SRR14887963	PRJNA740269	head	6757	16
SRR9007943	PRJNA541004	head	4567	10
SRR15990878	PRJNA764848	head	6008	13
SRR9020422	PRJNA541333	head	8307	16
SRR8769539	PRJNA521949	head	5279	10
SRR15560393	PRJNA756776	head	8062	14
SRR15990898	PRJNA764848	head	6347	10
SRR9312721	PRJNA549281	head	8052	12
SRR9020427	PRJNA541333	head	9628	14
SRR6793277	PRJNA436350	head	10011	13
SRR15560389	PRJNA756776	head	15649	19
SRR9020425	PRJNA541333	head	17193	18
SRR14755818	PRJNA735887	head	11717	12
SRR9020421	PRJNA541333	head	15423	15
SRR15560381	PRJNA756776	head	13997	10
