# Supplementary material for: Data mining reveals tissue-specific expression and host lineage-associated forms of Apis mellifera filamentous virus
Source: PeerJ. 2023 Nov 14;11:e16455. doi: 10.7717/peerj.16455 (PMC10655722; doi:10.7717/peerj.16455)
Supplement: Supplemental Information 22 — Alignment metrics are standard output of BLASTN tabular format. Any use of trade, firm, or product names is for descriptive purposes only and does not imply endorsement by the U.S. Government. [file peerj-11-16455-s022.xlsx]

## Sheet: NC_027925.1 ORFs to OK392616.1
Supplemental File S11. Reciprocal alignment scores between open reading frames (ORFs) annotated in NCBI accessions OK392616.1 and NC_027925.1. Alignment metrics are standard output of BLASTN tabular format. Any use of trade, firm, or product names is for descriptive purposes only and does not imply endorsement by the U.S. Government.
Query	Subject	Percent identity	Matches	Mismatches	Gaps	Query start	Query end	Subject start	Subject end	E-value	Bit score
gp001	OK392616.1	96.334	3519	114	9	1	3516	3519	13	0	5770
gp002	OK392616.1	94.196	2912	116	11	1	2892	5440	2562	0	4394
gp003	OK392616.1	97.877	471	10	0	1	471	7773	8243	0	832
gp004	OK392616.1	98.148	162	3	0	1	162	10116	9955	6.22e-80	289
gp005	OK392616.1	97.86	4065	87	0	1	4065	14429	10365	0	7145
gp006	OK392616.1	99.922	5097	4	0	1	5097	23727	18631	0	9393
gp007	OK392616.1	100	165	0	0	1	165	24025	23861	6.31e-85	305
gp008	OK392616.1	99.817	546	1	0	1	546	25083	24538	0	1003
gp009	OK392616.1	99.925	1326	1	0	1	1326	26823	25498	0	2444
gp010	OK392616.1	98.958	192	2	0	1	192	27322	27131	4.4e-97	346
gp011	OK392616.1	99.191	1731	14	0	1	1731	29912	28182	0	3129
gp012	OK392616.1	99.435	177	1	0	1	177	30111	29935	1.88e-90	324
gp013	OK392616.1	96.124	258	10	0	1	258	30539	30282	4.53e-123	433
gp014	OK392616.1	99.425	174	1	0	1	174	31206	31033	8.59e-89	318
gp015	OK392616.1	100	186	0	0	1	186	31955	31770	1.53e-96	344
gp016	OK392616.1	95.36	3944	155	10	1	3942	35883	31966	0	6263
gp017	OK392616.1	96.659	1227	41	0	1	1227	36930	38156	0	2041
gp018	OK392616.1	98.131	1926	33	1	1	1926	40281	38359	0	3356
gp019	OK392616.1	98.798	3576	43	0	1	3576	44866	41291	0	6407
gp020	OK392616.1	98.462	195	3	0	1	195	45972	45778	4.47e-97	346
gp021	OK392616.1	99.065	963	9	0	1	963	45971	46933	0	1731
gp022	OK392616.1	99.631	813	3	0	1	813	46998	47810	0	1487
gp023	OK392616.1	97.531	1944	30	1	1	1926	48221	50164	0	3312
gp024	OK392616.1	97.386	1224	26	2	1	1221	52232	51012	0	2106
gp025	OK392616.1	98.119	1542	29	0	1	1542	53583	52042	0	2708
gp026	OK392616.1	99.057	318	3	0	1	318	53945	53628	3.18e-165	573
gp027	OK392616.1	98.691	1833	24	0	1	1833	55944	54112	0	3269
gp028	OK392616.1	99.327	297	2	0	1	297	56338	56042	1.08e-154	538
gp029	OK392616.1	98.413	441	7	0	1	441	59657	60097	0	789
gp030	OK392616.1	97.101	690	11	1	1	690	61204	60524	0	1155
gp031	OK392616.1	96.154	234	9	0	1	234	61566	61333	1.16e-108	385
gp032	OK392616.1	98.387	186	2	1	1	186	61914	61730	5.53e-91	326
gp033	OK392616.1	98.742	159	2	0	1	159	62478	62320	2.83e-78	283
gp034	OK392616.1	98.008	1506	27	1	1	1506	63935	62433	0	2617
gp035	OK392616.1	96.618	207	7	0	1	207	65071	64865	1.72e-96	344
gp036	OK392616.1	96.804	219	7	0	1	219	65865	65647	3.9e-103	366
gp037	OK392616.1	97.674	258	6	0	1	258	66850	66593	2.09e-126	444
gp038	OK392616.1	93.333	180	3	2	1	180	67021	66851	1.97e-70	257
gp039	OK392616.1	96.296	270	9	1	13	282	67605	67337	8.27e-126	442
gp040	OK392616.1	98.113	318	5	1	1	318	67955	67639	4.15e-159	553
gp041	OK392616.1	98.334	6303	93	2	1	6291	69125	75427	0	11069
gp042	OK392616.1	98.529	1632	24	0	1	1632	78133	76502	0	2881
gp043	OK392616.1	97.759	4908	89	7	1	4896	83733	78835	0	8445
gp044	OK392616.1	96.491	171	5	1	2	171	85101	84931	1.11e-77	281
gp045	OK392616.1	97.236	2352	53	5	1	2352	87526	85187	0	3973
gp046	OK392616.1	83.908	174	9	5	5	170	88052	87890	1.19e-37	148
gp047	no match in OK392616.1 due to N's in that reference, found in all de novo assembled draft genomes
gp048	OK392616.1	98.932	2527	27	0	3	2529	91398	88872	0	4518
gp049	OK392616.1	99.115	904	8	0	24	927	92708	91805	0	1626
gp050	OK392616.1	98.139	5751	95	5	1	5751	94255	99993	0	10065
gp051	OK392616.1	99.318	1026	7	0	1	1026	101282	100257	0	1857
gp052	OK392616.1	99.605	1518	6	0	1	1518	101453	102970	0	2771
gp053	OK392616.1	99.213	381	3	0	1	381	102977	103357	0	688
gp054	OK392616.1	97.769	3182	59	4	1	3173	103948	107126	0	5483
gp055	OK392616.1	98.389	807	13	0	1	807	107272	108078	0	1426
gp056	OK392616.1	97.241	870	12	1	1	870	109421	108564	0	1463
gp057	OK392616.1	98.403	1002	10	1	1	996	110891	109890	0	1757
gp058	OK392616.1	99.025	4104	38	2	1	4104	111071	115172	0	7365
gp059	OK392616.1	97.814	2653	47	4	523	3174	115907	118549	0	4569
gp060	OK392616.1	98.193	2490	45	0	1	2490	118853	121342	0	4349
gp061	OK392616.1	100	201	0	0	1	201	121947	121747	7.63e-105	372
gp062	OK392616.1	99.26	2028	15	0	1	2028	124312	122285	0	3664
gp063	OK392616.1	97.372	2778	43	8	1	2757	124990	127758	0	4698
gp064	OK392616.1	98.507	804	3	1	1	795	128985	128182	0	1410
gp065	OK392616.1	97.538	3534	42	8	1	3519	129411	132914	0	6004
gp066	OK392616.1	98.611	72	1	0	1	72	133767	133696	5.48e-32	128
gp067	OK392616.1	99.369	1109	4	1	1	1106	136394	135286	0	2006
gp068	OK392616.1	99.693	978	3	0	1	978	136582	135605	0	1790
gp069	OK392616.1	99.364	786	5	0	1	786	137072	137857	0	1424
gp070	OK392616.1	96.593	499	15	2	1	498	138522	138025	0	833
gp071	OK392616.1	98.447	837	10	1	1	834	140929	140093	0	1472
gp072	OK392616.1	95.738	3942	114	14	1	3933	145808	141912	0	6312
gp073	OK392616.1	96.152	1897	59	5	1	1893	147826	145940	0	3121
gp074	OK392616.1	98.011	5883	81	5	1	5865	148398	154262	0	10214
gp075	OK392616.1	98.694	1302	14	1	1	1299	154882	156183	0	2309
gp076	OK392616.1	97.188	1707	30	2	1	1689	158535	156829	0	2896
gp077	OK392616.1	97.494	3591	63	5	1	3591	162945	159382	0	6135
gp078	OK392616.1	98.214	1008	18	0	1	1008	164629	163622	0	1777
gp079	OK392616.1	96.667	150	5	0	1	150	166410	166261	5.78e-70	255
gp080	OK392616.1	99.009	1716	17	0	1	1716	166409	168124	0	3094
gp081	OK392616.1	100	153	0	0	1	153	168788	168636	2.71e-78	283
gp082	OK392616.1	98.889	1530	17	0	1	1530	171227	172756	0	2741
gp083	OK392616.1	97.748	1110	25	0	1	1110	174178	175287	0	1951
gp084	OK392616.1	99.501	801	4	0	1	801	176916	177716	0	1459
gp085	OK392616.1	98.588	354	5	0	1	354	179373	179726	0	632
gp086	OK392616.1	98.88	2232	25	0	1	2232	182022	179791	0	4006
gp087	OK392616.1	98.849	1911	10	1	1	1899	184026	182116	0	3410
gp088	OK392616.1	99.405	840	5	0	1	840	189630	190469	0	1530
gp089	OK392616.1	99.407	1350	8	0	1	1350	190600	191949	0	2449
gp090	OK392616.1	94.783	345	5	3	1	345	195139	194808	9.86e-151	525
gp091	OK392616.1	99.333	1349	8	1	1	1348	196409	195061	0	2440
gp092	OK392616.1	99.533	1071	5	0	1	1071	196598	197668	0	1953
gp093	OK392616.1	98.705	5250	44	4	1	5247	202013	207241	0	9335
gp094	OK392616.1	97.024	168	5	0	1	168	207854	208021	1.8e-80	291
gp095	OK392616.1	99.127	4809	42	0	1	4809	213040	217848	0	8693
gp096	OK392616.1	99.173	846	7	0	1	846	219168	218323	0	1533
gp097	OK392616.1	99.204	1884	12	1	1	1881	219795	221678	0	3411
gp098	OK392616.1	99.367	2211	14	0	1	2211	224416	222206	0	4017
gp099	OK392616.1	98.705	1158	6	1	1	1158	226118	224970	0	2052
gp100	OK392616.1	99.668	1206	4	0	1	1206	227633	226428	0	2206
gp101	OK392616.1	98.94	5946	63	0	1	5946	228063	234008	0	10656
gp102	OK392616.1	96.045	1795	45	10	1	1791	236122	234350	0	2907
gp103	OK392616.1	96.165	1747	41	10	1	1743	234666	236390	0	2841
gp104	OK392616.1	96.33	545	15	3	1	545	236583	237122	0	891
gp105	OK392616.1	98.077	1092	15	1	1	1092	238793	239878	0	1901
gp106	OK392616.1	97.051	2001	47	1	1	1989	241976	239976	0	3398
gp107	OK392616.1	98.305	177	0	1	1	177	242975	243148	1.9e-85	307
gp108	OK392616.1	95.8	1881	79	0	1	1881	245521	243641	0	3107
gp109	OK392616.1	99.145	234	2	0	1	234	245738	245971	6.82e-121	425
gp110	OK392616.1	98.063	1497	29	0	1	1497	247659	246163	0	2623
gp111	OK392616.1	98.474	1311	20	0	1	1311	250002	248692	0	2318
gp112	OK392616.1	96.296	162	6	0	1	162	250527	250366	6.26e-75	272
gp113	OK392616.1	94.854	1749	90	0	1	1749	250686	252434	0	2800
gp114	OK392616.1	99.128	2637	23	0	1	2637	253713	256349	0	4745
gp115	OK392616.1	98.81	252	3	0	1	252	257013	257264	9.42e-130	455
gp116	OK392616.1	96.834	1611	51	0	1	1611	259183	257573	0	2724
gp117	OK392616.1	100	264	0	0	1	264	259903	259640	9.76e-140	488
gp118	OK392616.1	99.567	231	1	0	1	231	259848	260078	2.42e-120	424
gp119	OK392616.1	97.857	3033	38	6	1	3015	263748	260725	0	5243
gp120	OK392616.1	99.583	240	1	0	1	240	265190	265429	9e-125	438
gp121	OK392616.1	99.346	153	1	0	1	153	265551	265399	1.26e-76	278
gp122	OK392616.1	99.474	1521	8	0	1	1521	268678	267158	0	2765
gp123	OK392616.1	99.332	2844	19	0	1	2844	272839	269996	0	5158
gp124	OK392616.1	98.685	1521	20	0	1	1521	274543	273023	0	2717
gp125	OK392616.1	100	576	0	0	1	576	275555	274980	0	1064
gp126	OK392616.1	99.666	897	3	0	1	897	276870	275974	0	1642
gp127	OK392616.1	97.506	3890	97	0	2	3891	278067	281956	0	6752
gp128	OK392616.1	99.456	1470	8	0	1	1470	282295	283764	0	2671
gp129	OK392616.1	97.379	725	19	0	14	738	285375	284651	0	1234
gp130	OK392616.1	98.992	595	6	0	66	660	285680	286274	0	1066
gp131	OK392616.1	99.123	114	1	0	1	114	286630	286743	4.34e-55	206
gp132	OK392616.1	99.113	789	7	0	1	789	287917	288705	0	1419
gp133	OK392616.1	99.363	471	3	0	1	471	289593	290063	0	857
gp134	OK392616.1	97.631	591	14	0	1	591	290703	290113	0	1035
gp135	OK392616.1	98.324	1074	18	0	1	1074	291538	290465	0	1912
gp136	OK392616.1	96.93	228	7	0	1	228	291778	292005	6.72e-111	392
gp137	OK392616.1	97.778	180	4	0	1	180	292066	292245	1.49e-86	311
gp138	OK392616.1	99.63	1350	5	0	1	1350	292798	294147	0	2466
gp139	OK392616.1	99.008	504	5	0	1	504	294831	294328	0	905
gp140	OK392616.1	98.803	4344	40	2	1	4332	294988	299331	0	7725
gp141	OK392616.1	98.129	588	11	0	1	588	299995	300582	0	1026
gp142	OK392616.1	96.047	506	18	2	1	506	300339	300842	0	828
gp143	OK392616.1	99.534	1074	5	0	1	1074	302096	301023	0	1956
gp144	OK392616.1	97.125	2226	43	3	1	2205	304569	302344	0	3749
gp145	OK392616.1	96.875	192	6	0	1	192	305084	305275	7.54e-90	322
gp146	OK392616.1	99.083	654	6	0	1	654	306116	305463	0	1175
gp147	OK392616.1	98.485	198	3	0	1	198	306311	306508	3.52e-98	350
gp148	OK392616.1	99.615	1038	4	0	1	1038	307586	306549	0	1895
gp149	OK392616.1	99.738	381	1	0	1	381	308081	308461	0	699
gp150	OK392616.1	99.182	489	4	0	1	489	309187	309675	0	881
gp151	OK392616.1	98.316	1188	20	0	1	1188	310410	311597	0	2087
gp152	OK392616.1	97.919	2643	49	2	1	2637	315241	312599	0	4575
gp153	OK392616.1	86.667	180	21	2	1	177	315515	315694	7.12e-55	206
gp154	OK392616.1	98.431	2550	40	0	1	2550	316201	318750	0	4495
gp155	OK392616.1	93.007	143	10	0	3	145	318673	318815	4.84e-58	217
gp156	OK392616.1	99.2	750	6	0	1	750	318945	319694	0	1352
gp157	OK392616.1	99.51	612	3	0	1	612	320795	320184	0	1114
gp158	OK392616.1	94.41	161	7	1	1	159	321050	321210	3.72e-67	246
gp159	OK392616.1	100	192	0	0	1	192	321414	321605	7.31e-100	355
gp160	OK392616.1	93.75	160	9	1	1	159	322114	322273	6.22e-65	239
gp161	OK392616.1	98.594	996	14	0	1	996	323917	322922	0	1766
gp162	OK392616.1	98.198	222	4	0	1	222	323772	323993	8.45e-110	388
gp163	OK392616.1	99.435	177	1	0	1	177	324228	324404	6.77e-90	322
gp164	OK392616.1	99.084	546	5	0	1	546	325044	325589	0	981
gp165	OK392616.1	98.393	2116	21	4	1	2103	328365	326250	0	3720
gp166	OK392616.1	99.536	431	2	0	1	431	328839	328409	0	785
gp167	OK392616.1	95.652	207	9	0	1	207	328909	329115	3.78e-93	333
gp168	OK392616.1	97.683	3755	78	4	1	3753	332777	329030	0	6445
gp169	OK392616.1	97.033	1045	19	7	1	1035	332043	333085	0	1749
gp170	OK392616.1	98.274	753	13	0	1	753	333452	334204	0	1319
gp171	OK392616.1	94.902	255	13	0	1	255	335629	335375	1.62e-117	414
gp172	OK392616.1	98.113	159	3	0	1	159	335949	336107	1.32e-76	278
gp173	OK392616.1	96.078	1122	20	3	1	1122	338887	339984	0	1808
gp174	OK392616.1	98.354	243	4	0	1	243	340221	340463	1.97e-121	427
gp175	OK392616.1	99.565	919	3	1	1	918	342087	341169	0	1674
gp176	OK392616.1	100	108	0	0	1	108	343422	343529	1.89e-53	200
gp177	OK392616.1	94.558	294	16	0	1	294	343730	344023	8.5e-136	475
gp178	OK392616.1	96.875	192	6	0	1	192	344203	344394	1.59e-91	327
gp179	OK392616.1	100	80	0	0	1	80	344367	344446	4.9e-38	148
gp180	OK392616.1	96.005	876	26	1	1	876	344643	345509	0	1443
gp181	OK392616.1	96.907	291	9	0	1	291	345732	346022	1.08e-139	488
gp182	OK392616.1	98.063	2685	52	0	1	2685	346484	349168	0	4674
gp183	OK392616.1	95.371	5530	171	16	1	5484	355286	349796	0	8717
gp184	OK392616.1	97.518	282	7	0	1	282	355176	355457	4.87e-138	483
gp185	OK392616.1	97.222	144	4	0	1	144	355559	355702	1.19e-66	244
gp186	OK392616.1	91.667	300	22	1	1	297	356179	356478	1.47e-118	418
gp187	OK392616.1	97.054	2817	53	7	1	2814	361531	358742	0	4747
gp188	OK392616.1	99.213	1017	8	0	1	1017	369341	370357	0	1834
gp189	OK392616.1	95.758	165	4	1	1	162	371179	371015	3.77e-72	263
gp190	OK392616.1	94.242	330	4	5	1	327	371489	371172	3.4e-140	490
gp191	OK392616.1	86.55	171	4	5	1	171	373396	373245	2.5e-44	171
gp192	OK392616.1	100	153	0	0	1	153	380082	380234	2.71e-78	283
gp193	OK392616.1	96.67	2733	51	5	1	2697	383257	380529	0	4547
gp194	OK392616.1	94.902	255	5	1	1	255	383929	384175	4.53e-113	399
gp195	OK392616.1	98.582	423	6	0	1	423	384478	384056	0	758
gp196	OK392616.1	99.231	520	1	3	3	522	385790	385274	0	935
gp197	OK392616.1	97.436	351	4	5	1	351	386053	385708	2.71e-171	593
gp198	OK392616.1	99.216	1530	8	4	1	1530	387317	385792	0	2756
gp199	OK392616.1	99.333	150	1	0	1	150	391411	391262	5.74e-75	272
gp200	OK392616.1	98.86	3069	23	1	1	3069	394424	397480	0	5470
gp201	OK392616.1	98.45	258	3	1	1	258	397884	397628	3.47e-129	453
gp202	OK392616.1	98.372	1044	13	3	1	1041	399971	401013	0	1838
gp203	OK392616.1	98.99	2079	17	3	1	2076	400653	402730	0	3731
gp204	OK392616.1	98.851	87	1	0	1	87	404296	404210	3.2e-40	156
gp205	OK392616.1	100	135	0	0	1	135	404761	404627	2.38e-68	250
gp206	OK392616.1	98.975	2244	23	0	1	2244	406210	408453	0	4036
gp207	OK392616.1	98.551	138	2	0	1	138	408735	408598	8.8e-68	248
gp208	OK392616.1	100	177	0	0	1	177	409977	409801	1.46e-91	327
gp209	OK392616.1	95.433	416	11	6	1	411	411184	410772	0	660
gp210	OK392616.1	97.348	528	2	1	1	528	412803	413318	0	891
gp211	OK392616.1	98.044	2556	20	4	1	2541	413405	415945	0	4421
gp212	OK392616.1	99.727	1098	3	0	1	1098	420452	419355	0	2012
gp213	OK392616.1	96.296	162	6	0	1	162	422576	422737	1.35e-76	278
gp214	OK392616.1	99.15	588	5	0	1	588	425309	424722	0	1064
gp215	OK392616.1	99.254	5895	44	0	1	5895	431618	425724	0	10671
gp216	OK392616.1	98.672	7005	77	5	1	6999	436352	443346	0	12425
gp217	OK392616.1	99.074	432	4	0	1	432	443327	443758	0	776
gp218	OK392616.1	98.403	2505	19	3	1	2493	447353	444858	0	4399
gp219	OK392616.1	98.876	4626	52	0	1	4626	452657	448032	0	8298
gp220	OK392616.1	99.408	507	3	0	1	507	453847	453341	0	922
gp221	OK392616.1	97.917	1584	12	1	1	1584	455419	453857	0	2728
gp222	OK392616.1	95.175	228	11	0	1	228	459148	459375	5.23e-107	379
gp223	OK392616.1	98.765	324	4	0	1	324	460138	460461	1.94e-167	580
gp224	OK392616.1	98.148	162	0	3	1	159	462072	461911	3.67e-77	279
gp225	OK392616.1	99.192	4209	34	0	1	4209	462484	466692	0	7587
gp226	OK392616.1	98.97	1941	14	1	1	1941	466993	468927	0	3482
gp227	OK392616.1	99.123	114	1	0	1	114	469095	469208	1.21e-55	207
gp228	OK392616.1	98.309	414	7	0	1	414	469741	469328	0	728
gp229	OK392616.1	98.438	2880	45	0	1	2880	469950	472829	0	5132
gp230	OK392616.1	98.681	5079	58	1	1	5079	472845	477914	0	9062
gp231	OK392616.1	93.548	279	18	0	1	279	478084	478362	4.96e-118	416
gp232	OK392616.1	100	363	0	0	1	363	479124	479486	0	671
gp233	OK392616.1	100	249	0	0	1	249	480674	480426	2e-131	460
gp234	OK392616.1	98.667	150	2	0	1	150	480828	480977	2.07e-74	270
gp235	OK392616.1	100	1002	0	0	1	1002	482000	480999	0	1851
gp236	OK392616.1	99.846	1947	1	2	1	1947	483320	485264	0	3578
gp237	OK392616.1	99.963	5412	2	0	1	5412	485417	490828	0	9984
gp238	OK392616.1	100	243	0	0	1	243	491592	491350	4.21e-128	449
gp239	OK392616.1	100	621	0	0	1	621	491423	492043	0	1147
gp240	no match in OK392616.1 due to truncation, found in all de novo assembled draft genomes
gp241	no match in OK392616.1 due to truncation, found in all de novo assembled draft genomes

## Sheet: OK392616.1 ORFs to NC_027925.1
Query	Subject	Percent identity	Matches	Mismatches	Gaps	Query start	Query End	Subject Start	Subject end	E-value	Bit score
lcl|OK392616.1_cds_UQL06502.1_1	NC_027925.1	96.334	3519	114	9	1	3507	3528	13	0	5770
lcl|OK392616.1_cds_UQL06503.1_2	NC_027925.1	92.923	2925	145	17	1	2883	5181	2277	0	4200
lcl|OK392616.1_cds_UQL06504.1_3	NC_027925.1	97.877	471	10	0	1	471	7795	8265	0	832
lcl|OK392616.1_cds_UQL06505.1_4	NC_027925.1	98.148	162	3	0	1	162	10150	9989	6.27e-80	289
lcl|OK392616.1_cds_UQL06506.1_5	NC_027925.1	97.86	4065	87	0	1	4065	14463	10399	0	7145
lcl|OK392616.1_cds_UQL06507.1_6	NC_027925.1	99.922	5097	4	0	1	5097	23779	18683	0	9393
lcl|OK392616.1_cds_UQL06508.1_7	NC_027925.1	100	165	0	0	1	165	24077	23913	6.35e-85	305
lcl|OK392616.1_cds_UQL06509.1_8	NC_027925.1	99.817	546	1	0	1	546	25135	24590	0	1003
lcl|OK392616.1_cds_UQL06510.1_9	NC_027925.1	99.925	1326	1	0	1	1326	26875	25550	0	2444
lcl|OK392616.1_cds_UQL06511.1_10	NC_027925.1	98.958	192	2	0	1	192	27374	27183	4.43e-97	346
lcl|OK392616.1_cds_UQL06512.1_11	NC_027925.1	99.191	1731	14	0	1	1731	29956	28226	0	3129
lcl|OK392616.1_cds_UQL06513.1_12	NC_027925.1	99.435	177	1	0	1	177	30155	29979	1.9e-90	324
lcl|OK392616.1_cds_UQL06514.1_13	NC_027925.1	94.242	330	19	0	1	330	30583	30254	2.63e-151	527
lcl|OK392616.1_cds_UQL06515.1_14	NC_027925.1	100	186	0	0	1	186	31999	31814	1.54e-96	344
lcl|OK392616.1_cds_UQL06516.1_15	NC_027925.1	95.36	3944	155	10	1	3918	35951	32010	0	6263
lcl|OK392616.1_cds_UQL06517.1_16	NC_027925.1	96.659	1227	41	0	1	1227	37012	38238	0	2041
lcl|OK392616.1_cds_UQL06518.1_17	NC_027925.1	98.131	1926	33	1	1	1923	40371	38446	0	3356
lcl|OK392616.1_cds_UQL06519.1_18	NC_027925.1	98.798	3576	43	0	1	3576	44956	41381	0	6407
lcl|OK392616.1_cds_UQL06520.1_19	NC_027925.1	98.462	195	3	0	1	195	46059	45865	4.51e-97	346
lcl|OK392616.1_cds_UQL06521.1_20	NC_027925.1	99.065	963	9	0	1	963	46058	47020	0	1731
lcl|OK392616.1_cds_UQL06522.1_21	NC_027925.1	99.631	813	3	0	1	813	47085	47897	0	1487
lcl|OK392616.1_cds_UQL06523.1_22	NC_027925.1	97.531	1944	30	1	1	1944	48294	50219	0	3312
lcl|OK392616.1_cds_UQL06524.1_23	NC_027925.1	97.386	1224	26	2	1	1221	52306	51086	0	2106
lcl|OK392616.1_cds_UQL06525.1_24	NC_027925.1	98.119	1542	29	0	1	1542	53657	52116	0	2708
lcl|OK392616.1_cds_UQL06526.1_25	NC_027925.1	98.691	1833	24	0	1	1833	56018	54186	0	3269
lcl|OK392616.1_cds_UQL06527.1_26	NC_027925.1	99.327	297	2	0	1	297	56412	56116	1.09e-154	538
lcl|OK392616.1_cds_UQL06528.1_27	NC_027925.1	98.413	441	7	0	1	441	59731	60171	0	789
lcl|OK392616.1_cds_UQL06529.1_28	NC_027925.1	97.101	690	11	1	1	681	61290	60601	0	1155
lcl|OK392616.1_cds_UQL06530.1_29	NC_027925.1	96.154	234	9	0	1	234	61652	61419	1.17e-108	385
lcl|OK392616.1_cds_UQL06531.1_30	NC_027925.1	98.008	1506	27	1	1	1503	64033	62528	0	2617
lcl|OK392616.1_cds_UQL06532.1_31	NC_027925.1	97.674	258	6	0	1	258	66972	66715	2.11e-126	444
lcl|OK392616.1_cds_UQL06533.1_32	NC_027925.1	98.334	6303	93	2	1	6303	69260	75550	0	11069
lcl|OK392616.1_cds_UQL06534.1_33	NC_027925.1	98.529	1632	24	0	1	1632	78242	76611	0	2881
lcl|OK392616.1_cds_UQL06535.1_34	NC_027925.1	97.759	4908	89	7	1	4899	83834	78939	0	8445
lcl|OK392616.1_cds_UQL06536.1_35	NC_027925.1	97.236	2352	53	5	1	2340	87641	85290	0	3973
lcl|OK392616.1_cds_UQL06537.1_36	NC_027925.1	98.981	2355	24	0	1	2355	91339	88985	0	4217
lcl|OK392616.1_cds_UQL06538.1_37	NC_027925.1	99.115	904	8	0	9	912	92815	91912	0	1626
lcl|OK392616.1_cds_UQL06539.1_38	NC_027925.1	98.139	5751	95	5	1	5739	94376	100126	0	10065
lcl|OK392616.1_cds_UQL06540.1_39	NC_027925.1	99.318	1026	7	0	1	1026	101405	100380	0	1857
lcl|OK392616.1_cds_UQL06541.1_40	NC_027925.1	99.605	1518	6	0	1	1518	101589	103106	0	2771
lcl|OK392616.1_cds_UQL06542.1_41	NC_027925.1	99.213	381	3	0	1	381	103113	103493	0	688
lcl|OK392616.1_cds_UQL06543.1_42	NC_027925.1	97.769	3182	59	4	1	3179	104071	107243	0	5483
lcl|OK392616.1_cds_UQL06544.1_43	NC_027925.1	98.389	807	13	0	1	807	107392	108198	0	1426
lcl|OK392616.1_cds_UQL06545.1_44	NC_027925.1	97.241	870	12	1	1	858	109576	108707	0	1463
lcl|OK392616.1_cds_UQL06546.1_45	NC_027925.1	98.403	1002	10	1	1	1002	111053	110058	0	1757
lcl|OK392616.1_cds_UQL06547.1_46	NC_027925.1	99.015	4061	38	2	1	4059	111233	115293	0	7286
lcl|OK392616.1_cds_UQL06548.1_47	NC_027925.1	98.834	2145	25	0	1	2145	116578	118722	0	3825
lcl|OK392616.1_cds_UQL06549.1_48	NC_027925.1	98.193	2490	45	0	1	2490	119022	121511	0	4349
lcl|OK392616.1_cds_UQL06550.1_49	NC_027925.1	99.26	2028	15	0	1	2028	124491	122464	0	3664
lcl|OK392616.1_cds_UQL06551.1_50	NC_027925.1	97.372	2778	43	8	1	2769	125169	127925	0	4698
lcl|OK392616.1_cds_UQL06552.1_51	NC_027925.1	98.095	1050	6	2	1	1050	129381	128346	0	1820
lcl|OK392616.1_cds_UQL06553.1_52	NC_027925.1	97.538	3534	42	8	1	3504	129561	133079	0	6004
lcl|OK392616.1_cds_UQL06554.1_53	NC_027925.1	99.369	1109	4	1	1	1109	136580	135475	0	2006
lcl|OK392616.1_cds_UQL06555.1_54	NC_027925.1	99.693	978	3	0	1	978	136768	135791	0	1790
lcl|OK392616.1_cds_UQL06556.1_55	NC_027925.1	99.364	786	5	0	1	786	137258	138043	0	1424
lcl|OK392616.1_cds_UQL06557.1_56	NC_027925.1	96.593	499	15	2	1	498	138708	138211	0	833
lcl|OK392616.1_cds_UQL06558.1_57	NC_027925.1	98.447	837	10	1	1	837	141103	140270	0	1472
lcl|OK392616.1_cds_UQL06559.1_58	NC_027925.1	95.738	3942	114	14	1	3897	146018	142086	0	6312
lcl|OK392616.1_cds_UQL06560.1_59	NC_027925.1	96.152	1897	59	5	1	1887	148042	146150	0	3121
lcl|OK392616.1_cds_UQL06561.1_60	NC_027925.1	98.011	5883	81	5	1	5865	148610	154474	0	10214
lcl|OK392616.1_cds_UQL06562.1_61	NC_027925.1	98.694	1302	14	1	1	1302	155091	156389	0	2309
lcl|OK392616.1_cds_UQL06563.1_62	NC_027925.1	97.188	1707	30	2	1	1707	158736	157048	0	2896
lcl|OK392616.1_cds_UQL06564.1_63	NC_027925.1	97.494	3591	63	5	1	3564	163158	159568	0	6135
lcl|OK392616.1_cds_UQL06565.1_64	NC_027925.1	98.214	1008	18	0	1	1008	164860	163853	0	1777
lcl|OK392616.1_cds_UQL06566.1_65	NC_027925.1	96.667	150	5	0	1	150	166635	166486	5.83e-70	255
lcl|OK392616.1_cds_UQL06567.1_66	NC_027925.1	99.009	1716	17	0	1	1716	166634	168349	0	3094
lcl|OK392616.1_cds_UQL06568.1_67	NC_027925.1	100	153	0	0	1	153	169017	168865	2.73e-78	283
lcl|OK392616.1_cds_UQL06569.1_68	NC_027925.1	98.889	1530	17	0	1	1530	171457	172986	0	2741
lcl|OK392616.1_cds_UQL06570.1_69	NC_027925.1	97.748	1110	25	0	1	1110	174408	175517	0	1951
lcl|OK392616.1_cds_UQL06571.1_70	NC_027925.1	99.501	801	4	0	1	801	177162	177962	0	1459
lcl|OK392616.1_cds_UQL06572.1_71	NC_027925.1	98.588	354	5	0	1	354	179619	179972	0	632
lcl|OK392616.1_cds_UQL06573.1_72	NC_027925.1	98.88	2232	25	0	1	2232	182268	180037	0	4006
lcl|OK392616.1_cds_UQL06574.1_73	NC_027925.1	98.849	1911	10	1	1	1911	184260	182362	0	3410
lcl|OK392616.1_cds_UQL06575.1_74	NC_027925.1	99.405	840	5	0	1	840	189860	190699	0	1530
lcl|OK392616.1_cds_UQL06576.1_75	NC_027925.1	99.407	1350	8	0	1	1350	190830	192179	0	2449
lcl|OK392616.1_cds_UQL06577.1_76	NC_027925.1	98.514	1615	11	1	1	1602	196672	195058	0	2837
lcl|OK392616.1_cds_UQL06578.1_77	NC_027925.1	99.533	1071	5	0	1	1071	196861	197931	0	1953
lcl|OK392616.1_cds_UQL06579.1_78	NC_027925.1	98.705	5250	44	4	1	5229	202276	207522	0	9335
lcl|OK392616.1_cds_UQL06580.1_79	NC_027925.1	99.127	4809	42	0	1	4809	213299	218107	0	8693
lcl|OK392616.1_cds_UQL06581.1_80	NC_027925.1	99.173	846	7	0	1	846	219424	218579	0	1533
lcl|OK392616.1_cds_UQL06582.1_81	NC_027925.1	99.204	1884	12	1	1	1884	220054	221934	0	3411
lcl|OK392616.1_cds_UQL06583.1_82	NC_027925.1	99.367	2211	14	0	1	2211	224673	222463	0	4017
lcl|OK392616.1_cds_UQL06584.1_83	NC_027925.1	98.705	1158	6	1	1	1149	226384	225227	0	2052
lcl|OK392616.1_cds_UQL06585.1_84	NC_027925.1	99.668	1206	4	0	1	1206	227899	226694	0	2206
lcl|OK392616.1_cds_UQL06586.1_85	NC_027925.1	98.94	5946	63	0	1	5946	228316	234261	0	10656
lcl|OK392616.1_cds_UQL06587.1_86	NC_027925.1	96.045	1795	45	10	1	1773	236402	234612	0	2907
lcl|OK392616.1_cds_UQL06588.1_87	NC_027925.1	96.165	1747	41	10	1	1725	234928	236670	0	2841
lcl|OK392616.1_cds_UQL06589.1_88	NC_027925.1	96.388	526	15	2	1	522	236878	237403	0	863
lcl|OK392616.1_cds_UQL06590.1_89	NC_027925.1	98.077	1092	15	1	1	1086	239096	240187	0	1901
lcl|OK392616.1_cds_UQL06591.1_90	NC_027925.1	97.051	2001	47	1	1	2001	242273	240285	0	3398
lcl|OK392616.1_cds_UQL06592.1_91	NC_027925.1	98.305	177	0	1	1	174	243284	243460	1.87e-85	307
lcl|OK392616.1_cds_UQL06593.1_92	NC_027925.1	95.8	1881	79	0	1	1881	245836	243956	0	3107
lcl|OK392616.1_cds_UQL06594.1_93	NC_027925.1	99.145	234	2	0	1	234	246046	246279	6.87e-121	425
lcl|OK392616.1_cds_UQL06595.1_94	NC_027925.1	98.063	1497	29	0	1	1497	247967	246471	0	2623
lcl|OK392616.1_cds_UQL06596.1_95	NC_027925.1	98.474	1311	20	0	1	1311	250313	249003	0	2318
lcl|OK392616.1_cds_UQL06597.1_96	NC_027925.1	96.296	162	6	0	1	162	250838	250677	6.31e-75	272
lcl|OK392616.1_cds_UQL06598.1_97	NC_027925.1	94.854	1749	90	0	1	1749	251000	252748	0	2800
lcl|OK392616.1_cds_UQL06599.1_98	NC_027925.1	99.128	2637	23	0	1	2637	254033	256669	0	4745
lcl|OK392616.1_cds_UQL06600.1_99	NC_027925.1	98.81	252	3	0	1	252	257339	257590	9.49e-130	455
lcl|OK392616.1_cds_UQL06601.1_100	NC_027925.1	96.834	1611	51	0	1	1611	259519	257909	0	2724
lcl|OK392616.1_cds_UQL06602.1_101	NC_027925.1	100	264	0	0	1	264	260239	259976	9.83e-140	488
lcl|OK392616.1_cds_UQL06603.1_102	NC_027925.1	99.567	231	1	0	1	231	260184	260414	2.44e-120	424
lcl|OK392616.1_cds_UQL06604.1_103	NC_027925.1	97.857	3033	38	6	1	3024	264082	261068	0	5243
lcl|OK392616.1_cds_UQL06605.1_104	NC_027925.1	99.583	240	1	0	1	240	265542	265781	9.06e-125	438
lcl|OK392616.1_cds_UQL06606.1_105	NC_027925.1	99.474	1521	8	0	1	1521	269008	267488	0	2765
lcl|OK392616.1_cds_UQL06607.1_106	NC_027925.1	99.332	2844	19	0	1	2844	273162	270319	0	5158
lcl|OK392616.1_cds_UQL06608.1_107	NC_027925.1	98.87	1505	17	0	1	1505	274866	273362	0	2704
lcl|OK392616.1_cds_UQL06609.1_108	NC_027925.1	100	576	0	0	1	576	275880	275305	0	1064
lcl|OK392616.1_cds_UQL06610.1_109	NC_027925.1	99.666	897	3	0	1	897	277204	276308	0	1642
lcl|OK392616.1_cds_UQL06611.1_110	NC_027925.1	97.527	3882	96	0	1	3882	278409	282290	0	6743
lcl|OK392616.1_cds_UQL06612.1_111	NC_027925.1	99.456	1470	8	0	1	1470	282639	284108	0	2671
lcl|OK392616.1_cds_UQL06613.1_112	NC_027925.1	97.379	725	19	0	2	726	285720	284996	0	1234
lcl|OK392616.1_cds_UQL06614.1_113	NC_027925.1	99.425	522	3	0	1	522	286111	286632	0	948
lcl|OK392616.1_cds_UQL06615.1_114	NC_027925.1	98.544	1030	11	1	1	1026	288049	289078	0	1816
lcl|OK392616.1_cds_UQL06616.1_115	NC_027925.1	99.363	471	3	0	1	471	289961	290431	0	857
lcl|OK392616.1_cds_UQL06617.1_116	NC_027925.1	97.631	591	14	0	1	591	291071	290481	0	1035
lcl|OK392616.1_cds_UQL06618.1_117	NC_027925.1	98.324	1074	18	0	1	1074	291906	290833	0	1912
lcl|OK392616.1_cds_UQL06619.1_118	NC_027925.1	96.93	228	7	0	1	228	292146	292373	6.77e-111	392
lcl|OK392616.1_cds_UQL06620.1_119	NC_027925.1	97.778	180	4	0	1	180	292434	292613	1.5e-86	311
lcl|OK392616.1_cds_UQL06621.1_120	NC_027925.1	99.63	1350	5	0	1	1350	293170	294519	0	2466
lcl|OK392616.1_cds_UQL06622.1_121	NC_027925.1	99.008	504	5	0	1	504	295210	294707	0	905
lcl|OK392616.1_cds_UQL06623.1_122	NC_027925.1	98.803	4344	40	2	1	4344	295367	299698	0	7725
lcl|OK392616.1_cds_UQL06624.1_123	NC_027925.1	98.129	588	11	0	1	588	300364	300951	0	1026
lcl|OK392616.1_cds_UQL06625.1_124	NC_027925.1	95.785	522	19	3	1	519	300708	301229	0	845
lcl|OK392616.1_cds_UQL06626.1_125	NC_027925.1	99.534	1074	5	0	1	1074	302473	301400	0	1956
lcl|OK392616.1_cds_UQL06627.1_126	NC_027925.1	97.125	2226	43	3	1	2226	304922	302718	0	3749
lcl|OK392616.1_cds_UQL06628.1_127	NC_027925.1	96.93	228	7	0	1	228	305432	305659	4.07e-108	383
lcl|OK392616.1_cds_UQL06629.1_128	NC_027925.1	99.083	654	6	0	1	654	306464	305811	0	1175
lcl|OK392616.1_cds_UQL06630.1_129	NC_027925.1	98.485	198	3	0	1	198	306659	306856	3.54e-98	350
lcl|OK392616.1_cds_UQL06631.1_130	NC_027925.1	99.615	1038	4	0	1	1038	307934	306897	0	1895
lcl|OK392616.1_cds_UQL06632.1_131	NC_027925.1	99.738	381	1	0	1	381	308429	308809	0	699
lcl|OK392616.1_cds_UQL06633.1_132	NC_027925.1	99.182	489	4	0	1	489	309551	310039	0	881
lcl|OK392616.1_cds_UQL06634.1_133	NC_027925.1	98.316	1188	20	0	1	1188	310772	311959	0	2087
lcl|OK392616.1_cds_UQL06635.1_134	NC_027925.1	97.919	2643	49	2	1	2643	315610	312974	0	4575
lcl|OK392616.1_cds_UQL06636.1_135	NC_027925.1	98.431	2550	40	0	1	2550	316571	319120	0	4495
lcl|OK392616.1_cds_UQL06637.1_136	NC_027925.1	99.22	769	6	0	18	786	319304	320072	0	1387
lcl|OK392616.1_cds_UQL06638.1_137	NC_027925.1	99.51	612	3	0	1	612	321172	320561	0	1114
lcl|OK392616.1_cds_UQL06639.1_138	NC_027925.1	96.296	270	8	1	1	270	321416	321683	7.95e-126	442
lcl|OK392616.1_cds_UQL06640.1_139	NC_027925.1	100	192	0	0	1	192	321778	321969	7.36e-100	355
lcl|OK392616.1_cds_UQL06641.1_140	NC_027925.1	98.594	996	14	0	1	996	324263	323268	0	1766
lcl|OK392616.1_cds_UQL06642.1_141	NC_027925.1	98.198	222	4	0	1	222	324118	324339	8.51e-110	388
lcl|OK392616.1_cds_UQL06643.1_142	NC_027925.1	99.084	546	5	0	1	546	325397	325942	0	981
lcl|OK392616.1_cds_UQL06644.1_143	NC_027925.1	98.962	1926	20	0	1	1926	328507	326582	0	3459
lcl|OK392616.1_cds_UQL06645.1_144	NC_027925.1	98.72	547	7	0	1	547	329158	328612	0	972
lcl|OK392616.1_cds_UQL06646.1_145	NC_027925.1	97.793	3715	73	4	1	3708	333101	329389	0	6399
lcl|OK392616.1_cds_UQL06647.1_146	NC_027925.1	97.034	1079	20	7	1	1077	332367	333435	0	1807
lcl|OK392616.1_cds_UQL06648.1_147	NC_027925.1	98.274	753	13	0	1	753	333767	334519	0	1319
lcl|OK392616.1_cds_UQL06649.1_148	NC_027925.1	94.932	296	14	1	6	300	335981	335686	2.43e-136	477
lcl|OK392616.1_cds_UQL06650.1_149	NC_027925.1	98.113	159	3	0	1	159	336273	336431	1.33e-76	278
lcl|OK392616.1_cds_UQL06651.1_150	NC_027925.1	96.078	1122	20	3	1	1098	339203	340324	0	1808
lcl|OK392616.1_cds_UQL06652.1_151	NC_027925.1	98.354	243	4	0	1	243	340549	340791	1.99e-121	427
lcl|OK392616.1_cds_UQL06653.1_152	NC_027925.1	99.631	813	3	0	1	813	342314	341502	0	1485
lcl|OK392616.1_cds_UQL06654.1_153	NC_027925.1	94.558	294	16	0	1	294	344064	344357	8.56e-136	475
lcl|OK392616.1_cds_UQL06655.1_154	NC_027925.1	96.875	192	6	0	1	192	344537	344728	1.6e-91	327
lcl|OK392616.1_cds_UQL06656.1_155	NC_027925.1	96.005	876	26	1	1	867	344977	345852	0	1443
lcl|OK392616.1_cds_UQL06657.1_156	NC_027925.1	96.907	291	9	0	1	291	346075	346365	1.09e-139	488
lcl|OK392616.1_cds_UQL06658.1_157	NC_027925.1	98.063	2685	52	0	1	2685	346826	349510	0	4674
lcl|OK392616.1_cds_UQL06659.1_158	NC_027925.1	96.187	2806	60	10	1	2781	352942	350159	0	4545
lcl|OK392616.1_cds_UQL06660.1_159	NC_027925.1	96.537	1848	49	3	1	1848	355642	353810	0	3044
lcl|OK392616.1_cds_UQL06661.1_160	NC_027925.1	97.518	282	7	0	1	282	355532	355813	4.91e-138	483
lcl|OK392616.1_cds_UQL06662.1_161	NC_027925.1	93.243	222	4	1	1	222	355837	356047	4.07e-88	316
lcl|OK392616.1_cds_UQL06663.1_162	NC_027925.1	97.054	2817	53	7	1	2790	361947	359134	0	4747
lcl|OK392616.1_cds_UQL06664.1_163	NC_027925.1	99.213	1017	8	0	1	1017	369733	370749	0	1834
lcl|OK392616.1_cds_UQL06665.1_164	NC_027925.1	93.275	342	7	4	1	330	371754	371417	3.46e-140	490
lcl|OK392616.1_cds_UQL06666.1_165	NC_027925.1	96.669	2912	56	6	1	2907	383800	380925	0	4844
lcl|OK392616.1_cds_UQL06667.1_166	NC_027925.1	98.582	423	6	0	1	423	384887	384465	0	758
lcl|OK392616.1_cds_UQL06668.1_167	NC_027925.1	99.181	2198	10	8	1	2190	387737	385540	0	3952
lcl|OK392616.1_cds_UQL06669.1_168	NC_027925.1	98.86	3069	23	1	1	3057	394842	397910	0	5470
lcl|OK392616.1_cds_UQL06670.1_169	NC_027925.1	98.598	214	2	1	1	213	398287	398074	1.76e-106	377
lcl|OK392616.1_cds_UQL06671.1_170	NC_027925.1	99.239	2761	17	3	1	2760	400368	403125	0	4988
lcl|OK392616.1_cds_UQL06672.1_171	NC_027925.1	98.975	2244	23	0	1	2244	406608	408851	0	4036
lcl|OK392616.1_cds_UQL06673.1_172	NC_027925.1	98.551	138	2	0	1	138	409133	408996	8.86e-68	248
lcl|OK392616.1_cds_UQL06674.1_173	NC_027925.1	97.348	528	2	1	1	516	413206	413733	0	891
lcl|OK392616.1_cds_UQL06675.1_174	NC_027925.1	98.044	2556	20	4	1	2541	413820	416360	0	4421
lcl|OK392616.1_cds_UQL06676.1_175	NC_027925.1	99.727	1098	3	0	1	1098	420896	419799	0	2012
lcl|OK392616.1_cds_UQL06677.1_176	NC_027925.1	96.97	264	8	0	1	264	423018	423281	7.71e-131	459
lcl|OK392616.1_cds_UQL06678.1_177	NC_027925.1	99.15	588	5	0	1	588	425738	425151	0	1064
lcl|OK392616.1_cds_UQL06679.1_178	NC_027925.1	99.254	5895	44	0	1	5895	432047	426153	0	10671
lcl|OK392616.1_cds_UQL06680.1_179	NC_027925.1	98.692	7417	81	5	1	7407	436815	444225	0	13164
lcl|OK392616.1_cds_UQL06681.1_180	NC_027925.1	98.403	2505	19	3	1	2496	447819	445327	0	4399
lcl|OK392616.1_cds_UQL06682.1_181	NC_027925.1	98.876	4626	52	0	1	4626	453119	448494	0	8298
lcl|OK392616.1_cds_UQL06683.1_182	NC_027925.1	99.408	507	3	0	1	507	454319	453813	0	922
lcl|OK392616.1_cds_UQL06684.1_183	NC_027925.1	97.917	1584	12	1	1	1563	455912	454329	0	2728
lcl|OK392616.1_cds_UQL06685.1_184	NC_027925.1	98.765	324	4	0	1	324	460624	460947	1.96e-167	580
lcl|OK392616.1_cds_UQL06686.1_185	NC_027925.1	98.148	162	0	3	1	162	462555	462397	3.77e-77	279
lcl|OK392616.1_cds_UQL06687.1_186	NC_027925.1	99.192	4209	34	0	1	4209	462982	467190	0	7587
lcl|OK392616.1_cds_UQL06688.1_187	NC_027925.1	98.97	1941	14	1	1	1935	467491	469431	0	3482
lcl|OK392616.1_cds_UQL06689.1_188	NC_027925.1	100	192	0	0	1	192	470245	470054	7.49e-100	355
lcl|OK392616.1_cds_UQL06690.1_189	NC_027925.1	98.438	2880	45	0	1	2880	470454	473333	0	5132
lcl|OK392616.1_cds_UQL06691.1_190	NC_027925.1	98.681	5079	58	1	1	5070	473349	478427	0	9062
lcl|OK392616.1_cds_UQL06692.1_191	NC_027925.1	93.548	279	18	0	1	279	478597	478875	4.99e-118	416
lcl|OK392616.1_cds_UQL06693.1_192	NC_027925.1	100	363	0	0	1	363	479632	479994	0	671
lcl|OK392616.1_cds_UQL06694.1_193	NC_027925.1	100	249	0	0	1	249	481182	480934	2.01e-131	460
lcl|OK392616.1_cds_UQL06695.1_194	NC_027925.1	98.667	150	2	0	1	150	481336	481485	2.08e-74	270
lcl|OK392616.1_cds_UQL06696.1_195	NC_027925.1	100	1002	0	0	1	1002	482508	481507	0	1851
lcl|OK392616.1_cds_UQL06697.1_196	NC_027925.1	99.933	7511	3	2	1	7509	483827	491337	0	13841
lcl|OK392616.1_cds_UQL06698.1_197	NC_027925.1	100	621	0	0	1	621	491932	492552	0	1147
